# Supplementary material for: Differentially Expressed Conserved Plant Vegetative Phase-Change-Related microRNAs in Mature and Rejuvenated Silver Birch In Vitro Propagated Tissues
Source: MDPI journal article supplement (doi:10.3390/plants12101993), 2023-05-16
Supplement: s1 [file s1]

Supplementary file 7. Photographs representative of the analyzed *in vitro* samples. Samples were maintained in *in vitro* culture for approximately 10 months prior to collection for analysis.

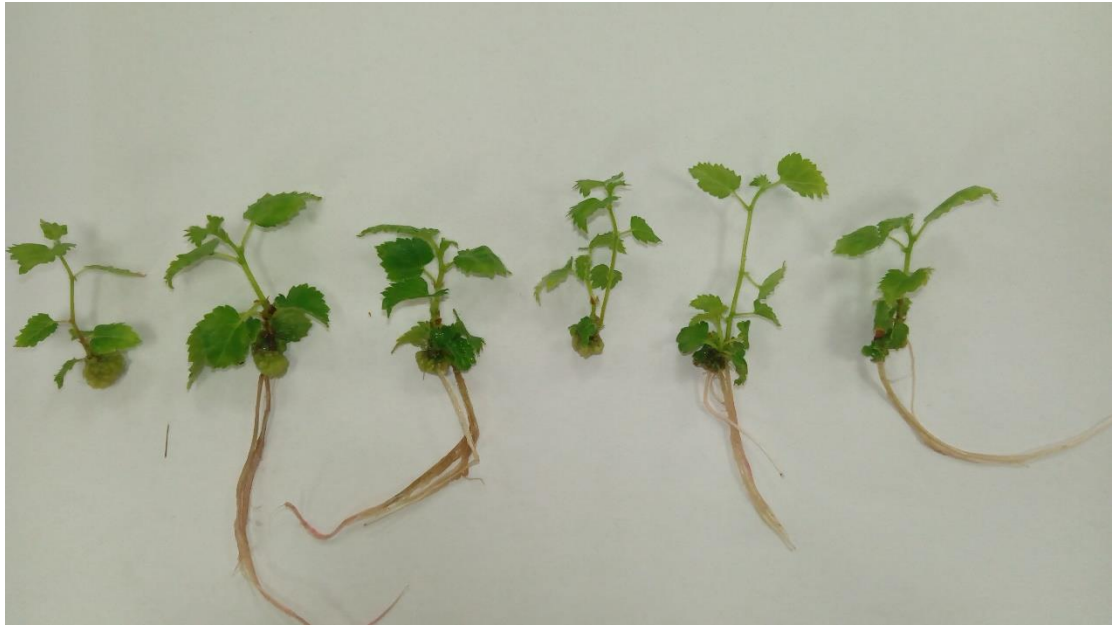

Typical rejuvenated *in vitro* shoots (REV samples).

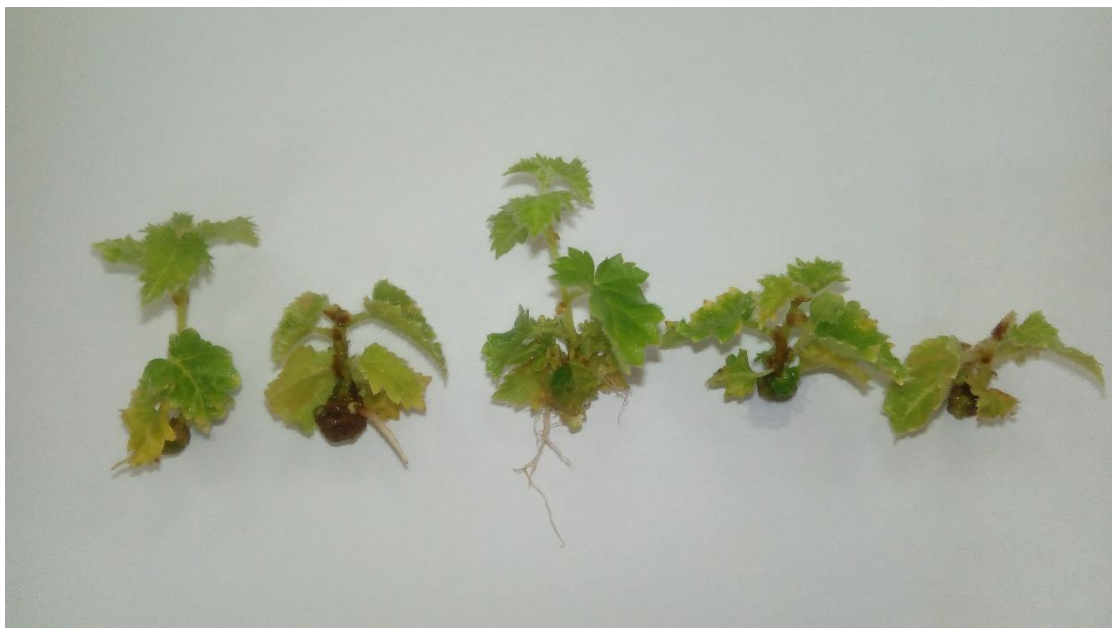

Typical mature *in vitro* shoots (IVM samples).
