# Supplementary material for: Differentially Expressed Conserved Plant Vegetative Phase-Change-Related microRNAs in Mature and Rejuvenated Silver Birch In Vitro Propagated Tissues
Source: Plants (Basel). 2023 May 16;12(10):1993. doi: 10.3390/plants12101993 (PMC10220576; doi:10.3390/plants12101993)
Supplement: Supplementary file 1 [file plants-12-01993-s001.zip]

Archive with 9 entries (9 files):
- Supplementary_files_Krivmane_plants/~$Supplementary_file4.xlsx
- Supplementary_files_Krivmane_plants/~$Supplementary_file5.xlsx
- Supplementary_files_Krivmane_plants/Supplementary_file1.xlsx
- Supplementary_files_Krivmane_plants/Supplementary_file2.xlsx
- Supplementary_files_Krivmane_plants/Supplementary_file3.xlsx
- Supplementary_files_Krivmane_plants/Supplementary_file4.xlsx
- Supplementary_files_Krivmane_plants/Supplementary_file5.xlsx
- Supplementary_files_Krivmane_plants/Supplementary_file6.xlsx
- Supplementary_files_Krivmane_plants/Supplementary_file7.pdf
