# Supplementary material for: Differentially Expressed Conserved Plant Vegetative Phase-Change-Related microRNAs in Mature and Rejuvenated Silver Birch In Vitro Propagated Tissues
Source: Plants (Basel). 2023 May 16;12(10):1993. doi: 10.3390/plants12101993 (PMC10220576; doi:10.3390/plants12101993)
Supplement: Supplementary file 1 [file plants-12-01993-s001.zip › Supplementary_files_Krivmane_plants/Supplementary_file1.xlsx]

## Sheet: Sheet1
Supplementary file 1. Conserved small RNAs identified from miRBase.
Annotation	Read count	Percentage
Total matches with mature miRNA sequences in miRBase	8664	0.31
Acacia auriculiformis	110	1.27
Acacia mangium	1	0.01
Glycine max	3749	43.27
Oryza sativa	686	7.92
Zea mays	161	1.86
Vitis vinifera	393	4.54
Prunus persica	381	4.4
Populus euphratica	1434	16.55
Populus trichocarpa	422	4.87
Pinus densata	20	0.23
Pinus taeda	69	0.8
Picea abies	298	3.44
Arabidopsis lyrata	431	4.97
Arabidopsis thaliana	368	4.25
Nicotiana tabacum	114	1.32
Brassica rapa	27	0.31
Unannotated	2768143	99.69
Total	2776807	100
