# Supplementary material for: Differentially Expressed Conserved Plant Vegetative Phase-Change-Related microRNAs in Mature and Rejuvenated Silver Birch In Vitro Propagated Tissues
Source: Plants (Basel). 2023 May 16;12(10):1993. doi: 10.3390/plants12101993 (PMC10220576; doi:10.3390/plants12101993)
Supplement: Supplementary file 1 [file plants-12-01993-s001.zip › Supplementary_files_Krivmane_plants/Supplementary_file2.xlsx]

## Sheet: Lapa1
Supplementary file 2. miRNA families identified in all sample types and sequencing libraries
Sample/Library	JUV (Clone VKA)				MAT (Clone VKA)			REV-1 (Clone VKA)		REV-2 (Clone 54-257)		IVM-1 (Clone VKA)		IVM-2 (Clone 54-257)
miRNA family	2_1_1	2_2_1	2_2_2	2_3_1	3_3_4_1	3_4_1	3_6_1	4_2_1	4_4_1	5_5_1	5_6_2	4_3_1	4_3_2	5_1_1	5_2_1
miR156		+	+	+	+	+		+	+	+	+	+	+	+	+
miR157	+	+	+	+	+	+	+	+	+	+	+	+	+	+	+
miR159	+	+	+	+	+	+	+	+	+	+	+	+	+	+	+
miR162			+	+	+	+				+	+	+	+		+
miR164			+		+	+				+	+			+
miR165	+	+	+	+	+	+	+	+	+	+	+	+	+	+	+
miR166	+	+	+	+	+	+	+	+	+	+	+	+	+	+	+
miR167			+	+	+	+	+	+	+	+	+	+	+	+	+
miR168			+	+	+	+		+		+	+	+	+	+	+
miR169			+	+	+	+				+	+	+	+	+	+
miR170			+	+	+					+	+	+	+		+
miR171			+	+	+	+		+	+	+	+	+	+	+	+
miR319	+		+	+	+	+			+	+	+	+	+	+	+
miR390			+		+	+				+	+	+	+	+
miR393			+	+	+	+		+	+	+	+	+	+	+	+
miR394	+		+	+	+	+		+		+	+	+	+		+
miR395			+	+	+	+	+		+	+	+
miR396	+		+	+	+	+		+	+	+	+	+	+	+	+
miR397			+	+			+	+	+	+	+	+	+	+	+
miR398		+	+	+	+		+	+		+	+	+	+	+	+
miR399				+	+	+				+	+		+	+
miR403	+	+	+	+	+	+	+	+	+	+	+	+	+	+	+
miR408		+	+	+	+			+	+	+	+	+	+	+	+
miR472		+	+		+	+	+	+		+	+	+	+	+	+
miR482	+	+	+	+	+	+	+	+	+	+	+	+	+	+	+
miR858	+		+	+	+	+				+	+	+	+	+	+
miR947						+					+		+	+
miR950			+			+					+		+	+
miR951										+	+		+	+	+
miR2118								+	+	+	+		+	+	+
miR2916		+	+	+	+			+		+	+	+	+	+	+
miR2950			+		+	+							+
miR3627			+					+		+	+	+	+	+	+
miR3630		+	+		+			+	+	+	+	+	+	+
miR3711			+					+			+	+	+		+
miR4995		+	+	+	+					+	+	+	+	+	+
miR5077	+	+	+	+	+	+	+	+	+	+	+	+	+	+	+
miR5083			+	+							+	+	+
miR5368		+	+	+	+				+	+	+	+	+	+	+
miR6300	+		+	+				+		+	+	+	+	+	+
miR6478			+	+	+					+	+	+	+
miR7122			+			+		+					+	+
miR8175			+	+	+	+	+	+	+	+	+	+	+	+	+
miR9726			+	+			+					+
miR11511											+		+
miR11571										+	+		+
miR160			+	+						+	+	+
miR172			+			+	+			+	+		+		+
miR535										+		+	+
miR1507			+									+	+
Total	12	15	43	33	33	29	15	26	20	41	45	38	46	35	33
