# Supplementary material for: Differentially Expressed Conserved Plant Vegetative Phase-Change-Related microRNAs in Mature and Rejuvenated Silver Birch In Vitro Propagated Tissues
Source: Plants (Basel). 2023 May 16;12(10):1993. doi: 10.3390/plants12101993 (PMC10220576; doi:10.3390/plants12101993)
Supplement: Supplementary file 1 [file plants-12-01993-s001.zip › Supplementary_files_Krivmane_plants/Supplementary_file3.xlsx]

## Sheet: Lapa1
Supplementary file 3. Differentially expressed miRNA isomiR groups
		Mean normalised expression values over all libraries				Differential expression between sample types (+ indicates p-value <0.05)
IsomiR group name	Consensus sequence	MAT	IVM	REV	JUV	MAT/JUV	IVM/REV	REV/JUV	IVM/JUV	REV/MAT	IVM/MAT
bpe-miR408-3p	ATGCACTGCCTCTTCCCTGGC	252.509	9102.77	8902.22	8665.02	+				+	+
bpe-miR408-5p	CAGGGAACAAGCAGAGCATGG	126.255	763.869	1983.65	4790.42	+
bpe-miR166h-5p	GGAATGTTGGCTGGCTCGAGG	13572.4	2259.78	3048.04	1549.84	+		+
bpe-miR169a-3p	GGCAAGTTGTCCTTGGCTAC	0	0	0	1549.84	+		+	+
bpe-miR169a-3p	GGCAAGTTGTCCTTGGCTACA	0	31.8279	145.145	12539.6	+		+	+
bpe-miR396g-5p	TCCCACAGCTTTATTGAACTG	126.255	541.074	580.58	5107.43	+		+	+
bpe-miR165a-3p	TCGGACCAGGCTTCATCCCC	9405.97	6524.71	2806.13	1268.05	+
bpe-miR165a-3p	TCGGACCAGGCTTCATCCCCC	378.764	286.451	241.908	0	+
bpe-miR166a-3p	TCGGACCAGGCTTCATTCCCC	351619	276202	163094	65445.6	+
bpe-miR156a-5p	TGACAGAAGAGAGTGAGCAC	189.382	4646.87	4402.73	8735.47	+				+	+
bpe-miR156x	TGACAGGAGATAGAGAGCAC	0	1241.29	1499.83	4649.52	+				+	+
bpe-miR408	TGCACTGCCTCTTCCCTGGCT	0	2991.82	1838.5	7854.88	+				+	+
bpe-miR398a-3p	TGTGTTCTCAGGTCACCCCTT	0	381.934	435.435	2465.66	+
bpe-miR858b	TTCGTTGTCTGTTCGACCTTG	4671.42	10057.6	870.869	246.566	+	+		+
bpe-miR156ab	TTGACAGGAGATAGAGAGCAC	0	1145.8	1644.98	7819.65	+				+	+
bpe-miR171h	TTGAGCCGCGTCAATATCTCC	1956.95	9039.12	2951.28	70.4473	+			+
bpe-miR394a-5p	TTGGCATTCTGTCCACCTCC	189.382	636.557	1935.27	6375.48	+			+
bpe-miR482a-3p	TTTCCGAAACCTCCCATTCCAA	126.255	63.6557	0	140.895	+		+
bpe-miR472-3p	TTTTTCCTACTCCGCCCATACC	1956.95	9134.6	2902.9	211.342	+			+
bpe-miR157d-3p	GCTCTCTATGCTTCTGTCATC	126.255	7734.17	7692.68	810.144			+	+	+	+
bpe-miR5368	GGACAGTCTCAGGTAGACA	505.019	700.213	193.527	1585.07			+
bpe-miR5077	GTTCGCGTCGGGTTCACCA	17423.1	38575.4	13256.6	45332.9		+	+
bpe-miR166h-3p	TCTCGGACCAGGCTTCATTCC	149738	112257	232087	46636.1			+
bpe-miR482a	TCTTCCCTACTCCTCCCATTCC	36740.1	79060.4	49204.1	4649.52			+	+
bpe-miR403a-3p	TTAGATTCACGCACAAACTCG	17612.5	5028.8	5080.07	20077.5			+		+
bpe-miR403a	TTAGATTCACGCACAAACTTG	378.764	63.6557	48.3816	810.144			+
bpe-miR171m	TTGAGCCGCGTCAATATCTCA	63.1273	1718.71	822.488	0			+	+		+
bpe-miR2118a-3p	TTGCCGATTCCACCCATTCCT	0	286.451	435.435	0			+	+	+
bpe-miR395d-3p	CTGAAGTGTTTGGGGGAACTC	568.146	0	387.053	2465.66				+
bpe-miR167b-3p	GGTCATGCTCTGACAGCCTCACT	126.255	445.59	338.671	35.2237				+
bpe-miR166a	TCGGACCAGGCTTCATTCC	883.783	1909.67	1209.54	211.342				+
bpe-miR3627b	TGTCGCAGGAGAGATGGCGCTA	441.891	509.246	241.908	105.671				+
bpe-miR319	TTGGACTGAAGGGAGCTCCCT	441.891	859.353	241.908	105.671				+
bpe-miR858-5p	TTTCGTTGTCTGTTCGACCTT	757.528	2259.78	241.908	35.2237		+		+
bpe-miR156g	ACAGAAGATAGAGAGCACAG	281.789	677.343	286.451	0					+
bpe-miR8175	GATCCCCGGCAACGGCGCCA	4121.17	1451.45	9484.71	187		+			+
bpe-miR157d-5p	TGACAGAAGATAGAGAGCAC	14441.7	13643.6	7988.8	99					+
bpe-miR169d-5p	TGAGCCAAGGATGACTTGCCG	387.46	0	63.6557	20					+	+
bpe-miR408d	TGCACTGCCTCTTCCCTGGC	1197.6	774.106	1846.02	63.1273						+
bpe-miR3711	TGGCGCTAGAAGGAGGGCCT	281.789	290.29	859.353	63.1273						+
bpe-miR159a.1	TTTGGATTGAAGGGAGCTCTG	378.764	413.762	145.145	176.118		+
