# Supplementary material for: Differentially Expressed Conserved Plant Vegetative Phase-Change-Related microRNAs in Mature and Rejuvenated Silver Birch In Vitro Propagated Tissues
Source: Plants (Basel). 2023 May 16;12(10):1993. doi: 10.3390/plants12101993 (PMC10220576; doi:10.3390/plants12101993)
Supplement: Supplementary file 1 [file plants-12-01993-s001.zip › Supplementary_files_Krivmane_plants/Supplementary_file4.xlsx]

## Sheet: pre-miRNA_DE_p<0.05
Supplementary file 4. Potential precursor miRNA sequences for differentially expressed miRNAs
IsomiRs group name	isomiR's name	Length (nt)	miRNA sequence	Precursor 1	Contig	pre-miRNA length (nt)	A	C	G	U/T	(G+C)/seq length*100	MFE (dG, − kcal/mol)	AMFE= (MFE: RNA seq length x 100 (− kcal/mol)	MFEI = AMFE/(G+C)/seq length%	Precursor 2	Contig	pre-miRNA length (nt)	A	C	G	U/T	(G+C)/seq length*100	MFE (dG, − kcal/mol)	AMFE= (MFE: RNA seq length x 100 (− kcal/mol)	MFEI = AMFE/(G+C)/seq length%	Precursor 3	Contig	pre-miRNA length (nt)	A	C	G	U/T	(G+C)/seq length*100	MFE (dG, − kcal/mol)	AMFE= (MFE: RNA seq length x 100 (− kcal/mol)	MFEI = AMFE/(G+C)/seq length%	Precursor 4	Contig	pre-miRNA length (nt)	A	C	G	U/T	(G+C)/seq length*100	MFE (dG, − kcal/mol)	AMFE= (MFE: RNA seq length x 100 (− kcal/mol)	MFEI = AMFE/(G+C)/seq length%	Precursor 5	Contig
bpe-miR408-3p	bpe-miR408-3p	21	ATGCACTGCCTCTTCCCTGGC	CAGGGAACGGGCAGAGCATGGATGGAGCTATCGACAGTATAGGAACCTGTCGTGGCTCTACTCATGCACTGCCTCTTCCCTG	Contig129	82	18	22	24	18	56.0976	-52.9	-64.5122	-1.15
	bpe-miR408-3p.as.TT	22	TGCACTGCCTCTTCCCTGGCTT	CAGGGAACGGGCAGAGCATGGATGGAGCTATCGACAGTATAGGAACCTGTCGTGGCTCTACTCATGCACTGCCTCTTCCCTG	Contig129	82	18	22	24	18	56.0976	-52.9	-64.5122	-1.15
	bpe-miR408-3p.gc	19	ATGCACTGCCTCTTCCCTG	CAGGGAACGGGCAGAGCATGGATGGAGCTATCGACAGTATAGGAACCTGTCGTGGCTCTACTCATGCACTGCCTCTTCCCTG	Contig129	82	18	22	24	18	56.0976	-52.9	-64.5122	-1.15
	bpe-miR408-3p.C	22	ATGCACTGCCTCTTCCCTGGCC	CAGGGAACGGGCAGAGCATGGATGGAGCTATCGACAGTATAGGAACCTGTCGTGGCTCTACTCATGCACTGCCTCTTCCCTG	Contig129	82	18	22	24	18	56.0976	-52.9	-64.5122	-1.15
	bpe-miR408-3p.c	20	ATGCACTGCCTCTTCCCTGG	CAGGGAACGGGCAGAGCATGGATGGAGCTATCGACAGTATAGGAACCTGTCGTGGCTCTACTCATGCACTGCCTCTTCCCTG	Contig129	82	18	22	24	18	56.0976	-52.9	-64.5122	-1.15
	bpe-miR408-3p.as.gc	18	TGCACTGCCTCTTCCCTG	CAGGGAACGGGCAGAGCATGGATGGAGCTATCGACAGTATAGGAACCTGTCGTGGCTCTACTCATGCACTGCCTCTTCCCTG	Contig129	82	18	22	24	18	56.0976	-52.9	-64.5122	-1.15
	bpe-miR408-3p.as.c	19	TGCACTGCCTCTTCCCTGG	CAGGGAACGGGCAGAGCATGGATGGAGCTATCGACAGTATAGGAACCTGTCGTGGCTCTACTCATGCACTGCCTCTTCCCTG	Contig129	82	18	22	24	18	56.0976	-52.9	-64.5122	-1.15
	bpe-miR408-3p.C.A	23	ATGCACTGCCTCTTCCCTGGCCA	CAGGGAACGGGCAGAGCATGGATGGAGCTATCGACAGTATAGGAACCTGTCGTGGCTCTACTCATGCACTGCCTCTTCCCTG	Contig129	82	18	22	24	18	56.0976	-52.9	-64.5122	-1.15
	bpe-miR408-3p.As.A1G	22	AGTGCACTGCCTCTTCCCTGGC	CAGGGAACGGGCAGAGCATGGATGGAGCTATCGACAGTATAGGAACCTGTCGTGGCTCTACTCATGCACTGCCTCTTCCCTG	Contig129	82	18	22	24	18	56.0976	-52.9	-64.5122	-1.15
	bpe-miR408-3p.A	22	ATGCACTGCCTCTTCCCTGGCA	CAGGGAACGGGCAGAGCATGGATGGAGCTATCGACAGTATAGGAACCTGTCGTGGCTCTACTCATGCACTGCCTCTTCCCTG	Contig129	82	18	22	24	18	56.0976	-52.9	-64.5122	-1.15
	bpe-miR408-3p.G20C.c	20	ATGCACTGCCTCTTCCCTGC	CAGGGAACGGGCAGAGCATGGATGGAGCTATCGACAGTATAGGAACCTGTCGTGGCTCTACTCATGCACTGCCTCTTCCCTG	Contig129	82	18	22	24	18	56.0976	-52.9	-64.5122	-1.15
	bpe-miR408-3p.C21T.C	22	ATGCACTGCCTCTTCCCTGGTC	CAGGGAACGGGCAGAGCATGGATGGAGCTATCGACAGTATAGGAACCTGTCGTGGCTCTACTCATGCACTGCCTCTTCCCTG	Contig129	82	18	22	24	18	56.0976	-52.9	-64.5122	-1.15
	bpe-miR408-3p.A1G.T	22	GTGCACTGCCTCTTCCCTGGCT	CAGGGAACGGGCAGAGCATGGATGGAGCTATCGACAGTATAGGAACCTGTCGTGGCTCTACTCATGCACTGCCTCTTCCCTG	Contig129	82	18	22	24	18	56.0976	-52.9	-64.5122	-1.15
	bpe-miR408-3p.T	22	ATGCACTGCCTCTTCCCTGGCT	CAGGGAACGGGCAGAGCATGGATGGAGCTATCGACAGTATAGGAACCTGTCGTGGCTCTACTCATGCACTGCCTCTTCCCTG	Contig129	82	18	22	24	18	56.0976	-52.9	-64.5122	-1.15
	bpe-miR408-3p.AC	23	ATGCACTGCCTCTTCCCTGGCAC	CAGGGAACGGGCAGAGCATGGATGGAGCTATCGACAGTATAGGAACCTGTCGTGGCTCTACTCATGCACTGCCTCTTCCCTG	Contig129	82	18	22	24	18	56.0976	-52.9	-64.5122	-1.15
	bpe-miR408-3p.C.T	23	ATGCACTGCCTCTTCCCTGGCCT	CAGGGAACGGGCAGAGCATGGATGGAGCTATCGACAGTATAGGAACCTGTCGTGGCTCTACTCATGCACTGCCTCTTCCCTG	Contig129	82	18	22	24	18	56.0976	-52.9	-64.5122	-1.15
	bpe-miR408-3p.as.C20G.C.T	22	TGCACTGCCTCTTCCCTGGGCT	CAGGGAACGGGCAGAGCATGGATGGAGCTATCGACAGTATAGGAACCTGTCGTGGCTCTACTCATGCACTGCCTCTTCCCTG	Contig129	82	18	22	24	18	56.0976	-52.9	-64.5122	-1.15
	bpe-miR408-3p.Cs.T	23	CATGCACTGCCTCTTCCCTGGCT	CAGGGAACGGGCAGAGCATGGATGGAGCTATCGACAGTATAGGAACCTGTCGTGGCTCTACTCATGCACTGCCTCTTCCCTG	Contig129	82	18	22	24	18	56.0976	-52.9	-64.5122	-1.15
	bpe-miR408-3p.Cs.AT	24	CATGCACTGCCTCTTCCCTGGCAT	CAGGGAACGGGCAGAGCATGGATGGAGCTATCGACAGTATAGGAACCTGTCGTGGCTCTACTCATGCACTGCCTCTTCCCTG	Contig129	82	18	22	24	18	56.0976	-52.9	-64.5122	-1.15
	bpe-miR408-3p.C21T.T	22	ATGCACTGCCTCTTCCCTGGTT	CAGGGAACGGGCAGAGCATGGATGGAGCTATCGACAGTATAGGAACCTGTCGTGGCTCTACTCATGCACTGCCTCTTCCCTG	Contig129	82	18	22	24	18	56.0976	-52.9	-64.5122	-1.15
	bpe-miR408-3p.C21T	21	ATGCACTGCCTCTTCCCTGGT	CAGGGAACGGGCAGAGCATGGATGGAGCTATCGACAGTATAGGAACCTGTCGTGGCTCTACTCATGCACTGCCTCTTCCCTG	Contig129	82	18	22	24	18	56.0976	-52.9	-64.5122	-1.15
	bpe-miR408-3p.A1T.T2A.T	22	TAGCACTGCCTCTTCCCTGGCT	CAGGGAACGGGCAGAGCATGGATGGAGCTATCGACAGTATAGGAACCTGTCGTGGCTCTACTCATGCACTGCCTCTTCCCTG	Contig129	82	18	22	24	18	56.0976	-52.9	-64.5122	-1.15
	bpe-miR408-3p.C12T	21	ATGCACTGCCTTTTCCCTGGC	CAGGGAACGGGCAGAGCATGGATGGAGCTATCGACAGTATAGGAACCTGTCGTGGCTCTACTCATGCACTGCCTCTTCCCTG	Contig129	82	18	22	24	18	56.0976	-52.9	-64.5122	-1.15
	bpe-miR408-3p.A1T.T2G.T	22	TGGCACTGCCTCTTCCCTGGCT	CAGGGAACGGGCAGAGCATGGATGGAGCTATCGACAGTATAGGAACCTGTCGTGGCTCTACTCATGCACTGCCTCTTCCCTG	Contig129	82	18	22	24	18	56.0976	-52.9	-64.5122	-1.15
	bpe-miR408-3p.G19T.gc	19	ATGCACTGCCTCTTCCCTT	CAGGGAACGGGCAGAGCATGGATGGAGCTATCGACAGTATAGGAACCTGTCGTGGCTCTACTCATGCACTGCCTCTTCCCTG	Contig129	82	18	22	24	18	56.0976	-52.9	-64.5122	-1.15
	bpe-miR408-3p.C17G	21	ATGCACTGCCTCTTCCGTGGC	CAGGGAACGGGCAGAGCATGGATGGAGCTATCGACAGTATAGGAACCTGTCGTGGCTCTACTCATGCACTGCCTCTTCCCTG	Contig129	82	18	22	24	18	56.0976	-52.9	-64.5122	-1.15
	bpe-miR408-3p.C21G.C	22	ATGCACTGCCTCTTCCCTGGGC	CAGGGAACGGGCAGAGCATGGATGGAGCTATCGACAGTATAGGAACCTGTCGTGGCTCTACTCATGCACTGCCTCTTCCCTG	Contig129	82	18	22	24	18	56.0976	-52.9	-64.5122	-1.15
	bpe-miR408-3p.TT	23	ATGCACTGCCTCTTCCCTGGCTT	CAGGGAACGGGCAGAGCATGGATGGAGCTATCGACAGTATAGGAACCTGTCGTGGCTCTACTCATGCACTGCCTCTTCCCTG	Contig129	82	18	22	24	18	56.0976	-52.9	-64.5122	-1.15
	bpe-miR408-3p.A1G	21	GTGCACTGCCTCTTCCCTGGC	CAGGGAACGGGCAGAGCATGGATGGAGCTATCGACAGTATAGGAACCTGTCGTGGCTCTACTCATGCACTGCCTCTTCCCTG	Contig129	82	18	22	24	18	56.0976	-52.9	-64.5122	-1.15
	bpe-miR408-3p.A1T.T2A	21	TAGCACTGCCTCTTCCCTGGC	CAGGGAACGGGCAGAGCATGGATGGAGCTATCGACAGTATAGGAACCTGTCGTGGCTCTACTCATGCACTGCCTCTTCCCTG	Contig129	82	18	22	24	18	56.0976	-52.9	-64.5122	-1.15
	bpe-miR408-3p.G19A	21	ATGCACTGCCTCTTCCCTAGC	CAGGGAACGGGCAGAGCATGGATGGAGCTATCGACAGTATAGGAACCTGTCGTGGCTCTACTCATGCACTGCCTCTTCCCTG	Contig129	82	18	22	24	18	56.0976	-52.9	-64.5122	-1.15
	bpe-miR408-3p.as.G19T.c	19	TGCACTGCCTCTTCCCTGT	CAGGGAACGGGCAGAGCATGGATGGAGCTATCGACAGTATAGGAACCTGTCGTGGCTCTACTCATGCACTGCCTCTTCCCTG	Contig129	82	18	22	24	18	56.0976	-52.9	-64.5122	-1.15
	bpe-miR408-3p.as.C.T	22	TGCACTGCCTCTTCCCTGGCCT	CAGGGAACGGGCAGAGCATGGATGGAGCTATCGACAGTATAGGAACCTGTCGTGGCTCTACTCATGCACTGCCTCTTCCCTG	Contig129	82	18	22	24	18	56.0976	-52.9	-64.5122	-1.15
	bpe-miR408-3p.as.G19T.C20A.TT	22	TGCACTGCCTCTTCCCTGTATT	CAGGGAACGGGCAGAGCATGGATGGAGCTATCGACAGTATAGGAACCTGTCGTGGCTCTACTCATGCACTGCCTCTTCCCTG	Contig129	82	18	22	24	18	56.0976	-52.9	-64.5122	-1.15
	bpe-miR408-3p.as.G18C.c	19	TGCACTGCCTCTTCCCTCG	CAGGGAACGGGCAGAGCATGGATGGAGCTATCGACAGTATAGGAACCTGTCGTGGCTCTACTCATGCACTGCCTCTTCCCTG	Contig129	82	18	22	24	18	56.0976	-52.9	-64.5122	-1.15
	bpe-miR408-3p.ats	19	GCACTGCCTCTTCCCTGGC	CAGGGAACGGGCAGAGCATGGATGGAGCTATCGACAGTATAGGAACCTGTCGTGGCTCTACTCATGCACTGCCTCTTCCCTG	Contig129	82	18	22	24	18	56.0976	-52.9	-64.5122	-1.15
	bpe-miR408-3p.ats.TG	21	GCACTGCCTCTTCCCTGGCTG	CAGGGAACGGGCAGAGCATGGATGGAGCTATCGACAGTATAGGAACCTGTCGTGGCTCTACTCATGCACTGCCTCTTCCCTG	Contig129	82	18	22	24	18	56.0976	-52.9	-64.5122	-1.15
bpe-miR408-5p	bpe-miR408-5p.A9G.A10G	21	CAGGGAACGGGCAGAGCATGG	CAGGGAACGGGCAGAGCATGGATGGAGCTATCGACAGTATAGGAACCTGTCGTGGCTCTACTCATGCACTGCCTCTTCCCTG	Contig129	82	18	22	24	18	56.0976	-52.9	-64.5122	-1.15
	bpe-miR408-5p.GAs.A9G.A10G.gg	21	GACAGGGAACGGGCAGAGCAT	CAGGGAACGGGCAGAGCATGGATGGAGCTATCGACAGTATAGGAACCTGTCGTGGCTCTACTCATGCACTGCCTCTTCCCTG	Contig129	82	18	22	24	18	56.0976	-52.9	-64.5122	-1.15
bpe-miR166h-5p	bpe-miR166h-5p.T8C	21	GGAATGTCGGCTGGCTCGAGG	TTTGAGGGGAATGTCGGCTGGCTCGAGGCTTTTTGGCTTTTGGCATGGGTGGTTTTCTCATGAAAAAAAGAACTCTTAAGGCTTCGGACCAGGCTTCATTCCCCTCAAA	Contig2096	109	23	22	30	34	47.7064	-53.1	-48.7156	-1.02115	GGGGAGGATGAAAAGTGAAGGTCTGGTGTGGGGAATGTTGTCTGGCTCGAGGCCACCAATAGACTGAATGATGACGTTCAGTTTGAGAGAGTTTTCTCGGACCAGGCTTCATTCCCCTCACTATCTTCTCTTTCTCTATCATTTTCTCT	Contig1055	149	31	31	39	48	46.9799	-69.8	-46.8456	-0.997143
	bpe-miR166h-5p.T8C.C	22	GGAATGTCGGCTGGCTCGAGGC	TTTGAGGGGAATGTCGGCTGGCTCGAGGCTTTTTGGCTTTTGGCATGGGTGGTTTTCTCATGAAAAAAAGAACTCTTAAGGCTTCGGACCAGGCTTCATTCCCCTCAAA	Contig2096	109	23	22	30	34	47.7064	-53.1	-48.7156	-1.02115	GGGGAGGATGAAAAGTGAAGGTCTGGTGTGGGGAATGTTGTCTGGCTCGAGGCCACCAATAGACTGAATGATGACGTTCAGTTTGAGAGAGTTTTCTCGGACCAGGCTTCATTCCCCTCACTATCTTCTCTTTCTCTATCATTTTCTCT	Contig1055	149	31	31	39	48	46.9799	-69.8	-46.8456	-0.997143
	bpe-miR166h-5p.T8C.g	20	GGAATGTCGGCTGGCTCGAG	TTTGAGGGGAATGTCGGCTGGCTCGAGGCTTTTTGGCTTTTGGCATGGGTGGTTTTCTCATGAAAAAAAGAACTCTTAAGGCTTCGGACCAGGCTTCATTCCCCTCAAA	Contig2096	109	23	22	30	34	47.7064	-53.1	-48.7156	-1.02115	GGGGAGGATGAAAAGTGAAGGTCTGGTGTGGGGAATGTTGTCTGGCTCGAGGCCACCAATAGACTGAATGATGACGTTCAGTTTGAGAGAGTTTTCTCGGACCAGGCTTCATTCCCCTCACTATCTTCTCTTTCTCTATCATTTTCTCT	Contig1055	149	31	31	39	48	46.9799	-69.8	-46.8456	-0.997143
	bpe-miR166h-5p.Gs.T8C.C	23	GGGAATGTCGGCTGGCTCGAGGC	TTTGAGGGGAATGTCGGCTGGCTCGAGGCTTTTTGGCTTTTGGCATGGGTGGTTTTCTCATGAAAAAAAGAACTCTTAAGGCTTCGGACCAGGCTTCATTCCCCTCAAA	Contig2096	109	23	22	30	34	47.7064	-53.1	-48.7156	-1.02115	GGGGAGGATGAAAAGTGAAGGTCTGGTGTGGGGAATGTTGTCTGGCTCGAGGCCACCAATAGACTGAATGATGACGTTCAGTTTGAGAGAGTTTTCTCGGACCAGGCTTCATTCCCCTCACTATCTTCTCTTTCTCTATCATTTTCTCT	Contig1055	149	31	31	39	48	46.9799	-69.8	-46.8456	-0.997143
	bpe-miR166h-5p.Gs.T8C	22	GGGAATGTCGGCTGGCTCGAGG	TTTGAGGGGAATGTCGGCTGGCTCGAGGCTTTTTGGCTTTTGGCATGGGTGGTTTTCTCATGAAAAAAAGAACTCTTAAGGCTTCGGACCAGGCTTCATTCCCCTCAAA	Contig2096	109	23	22	30	34	47.7064	-53.1	-48.7156	-1.02115	GGGGAGGATGAAAAGTGAAGGTCTGGTGTGGGGAATGTTGTCTGGCTCGAGGCCACCAATAGACTGAATGATGACGTTCAGTTTGAGAGAGTTTTCTCGGACCAGGCTTCATTCCCCTCACTATCTTCTCTTTCTCTATCATTTTCTCT	Contig1055	149	31	31	39	48	46.9799	-69.8	-46.8456	-0.997143
	bpe-miR166h-5p.T8C.T	22	GGAATGTCGGCTGGCTCGAGGT	TTTGAGGGGAATGTCGGCTGGCTCGAGGCTTTTTGGCTTTTGGCATGGGTGGTTTTCTCATGAAAAAAAGAACTCTTAAGGCTTCGGACCAGGCTTCATTCCCCTCAAA	Contig2096	109	23	22	30	34	47.7064	-53.1	-48.7156	-1.02115	GGGGAGGATGAAAAGTGAAGGTCTGGTGTGGGGAATGTTGTCTGGCTCGAGGCCACCAATAGACTGAATGATGACGTTCAGTTTGAGAGAGTTTTCTCGGACCAGGCTTCATTCCCCTCACTATCTTCTCTTTCTCTATCATTTTCTCT	Contig1055	149	31	31	39	48	46.9799	-69.8	-46.8456	-0.997143
	bpe-miR166h-5p.T8C.G21C	21	GGAATGTCGGCTGGCTCGAGC	TTTGAGGGGAATGTCGGCTGGCTCGAGGCTTTTTGGCTTTTGGCATGGGTGGTTTTCTCATGAAAAAAAGAACTCTTAAGGCTTCGGACCAGGCTTCATTCCCCTCAAA	Contig2096	109	23	22	30	34	47.7064	-53.1	-48.7156	-1.02115	GGGGAGGATGAAAAGTGAAGGTCTGGTGTGGGGAATGTTGTCTGGCTCGAGGCCACCAATAGACTGAATGATGACGTTCAGTTTGAGAGAGTTTTCTCGGACCAGGCTTCATTCCCCTCACTATCTTCTCTTTCTCTATCATTTTCTCT	Contig1055	149	31	31	39	48	46.9799	-69.8	-46.8456	-0.997143
	bpe-miR166h-5p.T8C.G9T	21	GGAATGTCTGCTGGCTCGAGG	TTTGAGGGGAATGTCGGCTGGCTCGAGGCTTTTTGGCTTTTGGCATGGGTGGTTTTCTCATGAAAAAAAGAACTCTTAAGGCTTCGGACCAGGCTTCATTCCCCTCAAA	Contig2096	109	23	22	30	34	47.7064	-53.1	-48.7156	-1.02115	GGGGAGGATGAAAAGTGAAGGTCTGGTGTGGGGAATGTTGTCTGGCTCGAGGCCACCAATAGACTGAATGATGACGTTCAGTTTGAGAGAGTTTTCTCGGACCAGGCTTCATTCCCCTCACTATCTTCTCTTTCTCTATCATTTTCTCT	Contig1055	149	31	31	39	48	46.9799	-69.8	-46.8456	-0.997143
	bpe-miR166h-5p.T8C.C15T	21	GGAATGTCGGCTGGTTCGAGG	TTTGAGGGGAATGTCGGCTGGCTCGAGGCTTTTTGGCTTTTGGCATGGGTGGTTTTCTCATGAAAAAAAGAACTCTTAAGGCTTCGGACCAGGCTTCATTCCCCTCAAA	Contig2096	109	23	22	30	34	47.7064	-53.1	-48.7156	-1.02115	GGGGAGGATGAAAAGTGAAGGTCTGGTGTGGGGAATGTTGTCTGGCTCGAGGCCACCAATAGACTGAATGATGACGTTCAGTTTGAGAGAGTTTTCTCGGACCAGGCTTCATTCCCCTCACTATCTTCTCTTTCTCTATCATTTTCTCT	Contig1055	149	31	31	39	48	46.9799	-69.8	-46.8456	-0.997143
	bpe-miR166h-5p.T8C.G	22	GGAATGTCGGCTGGCTCGAGGG	TTTGAGGGGAATGTCGGCTGGCTCGAGGCTTTTTGGCTTTTGGCATGGGTGGTTTTCTCATGAAAAAAAGAACTCTTAAGGCTTCGGACCAGGCTTCATTCCCCTCAAA	Contig2096	109	23	22	30	34	47.7064	-53.1	-48.7156	-1.02115	GGGGAGGATGAAAAGTGAAGGTCTGGTGTGGGGAATGTTGTCTGGCTCGAGGCCACCAATAGACTGAATGATGACGTTCAGTTTGAGAGAGTTTTCTCGGACCAGGCTTCATTCCCCTCACTATCTTCTCTTTCTCTATCATTTTCTCT	Contig1055	149	31	31	39	48	46.9799	-69.8	-46.8456	-0.997143
	bpe-miR166h-5p.gs.T7C	20	GAATGTCGGCTGGCTCGAGG	TTTGAGGGGAATGTCGGCTGGCTCGAGGCTTTTTGGCTTTTGGCATGGGTGGTTTTCTCATGAAAAAAAGAACTCTTAAGGCTTCGGACCAGGCTTCATTCCCCTCAAA	Contig2096	109	23	22	30	34	47.7064	-53.1	-48.7156	-1.02115	GGGGAGGATGAAAAGTGAAGGTCTGGTGTGGGGAATGTTGTCTGGCTCGAGGCCACCAATAGACTGAATGATGACGTTCAGTTTGAGAGAGTTTTCTCGGACCAGGCTTCATTCCCCTCACTATCTTCTCTTTCTCTATCATTTTCTCT	Contig1055	149	31	31	39	48	46.9799	-69.8	-46.8456	-0.997143
bpe-miR169a-3p	bpe-miR169a-3p.C12G	20	GGCAAGTTGTCGTTGGCTAC	AGAAAGTATTATGCAGCCAAGAATGACTTGCCGACTCTTGCTGGCTAGCTAGTTTGTTTCCTCTTTATAATTCAAGTAGTACTACTGATCCAAAAACCGATCGATCAACCAAGTCGGCAAGTTGTCGTTGGCTACATGTTTCTTTCT	Contig800	147	39	32	28	48	40.8163	-48.6	-33.0612	-0.81
	bpe-miR169a-3p.C12G.ac	18	GGCAAGTTGTCGTTGGCT	AGAAAGTATTATGCAGCCAAGAATGACTTGCCGACTCTTGCTGGCTAGCTAGTTTGTTTCCTCTTTATAATTCAAGTAGTACTACTGATCCAAAAACCGATCGATCAACCAAGTCGGCAAGTTGTCGTTGGCTACATGTTTCTTTCT	Contig800	147	39	32	28	48	40.8163	-48.6	-33.0612	-0.81
	bpe-miR169a-3p.Cs.C12G	21	CGGCAAGTTGTCGTTGGCTAC	AGAAAGTATTATGCAGCCAAGAATGACTTGCCGACTCTTGCTGGCTAGCTAGTTTGTTTCCTCTTTATAATTCAAGTAGTACTACTGATCCAAAAACCGATCGATCAACCAAGTCGGCAAGTTGTCGTTGGCTACATGTTTCTTTCT	Contig800	147	39	32	28	48	40.8163	-48.6	-33.0612	-0.81
bpe-miR169a-3p	bpe-miR169a-3p.C12G	21	GGCAAGTTGTCGTTGGCTACA	AGAAAGTATTATGCAGCCAAGAATGACTTGCCGACTCTTGCTGGCTAGCTAGTTTGTTTCCTCTTTATAATTCAAGTAGTACTACTGATCCAAAAACCGATCGATCAACCAAGTCGGCAAGTTGTCGTTGGCTACATGTTTCTTTCT	Contig800	147	39	32	28	48	40.8163	-48.6	-33.0612	-0.81
	bpe-miR169a-3p.gs.C11G	20	GCAAGTTGTCGTTGGCTACA	AGAAAGTATTATGCAGCCAAGAATGACTTGCCGACTCTTGCTGGCTAGCTAGTTTGTTTCCTCTTTATAATTCAAGTAGTACTACTGATCCAAAAACCGATCGATCAACCAAGTCGGCAAGTTGTCGTTGGCTACATGTTTCTTTCT	Contig800	147	39	32	28	48	40.8163	-48.6	-33.0612	-0.81
	bpe-miR169a-3p.gs.C11G.a	19	GCAAGTTGTCGTTGGCTAC	AGAAAGTATTATGCAGCCAAGAATGACTTGCCGACTCTTGCTGGCTAGCTAGTTTGTTTCCTCTTTATAATTCAAGTAGTACTACTGATCCAAAAACCGATCGATCAACCAAGTCGGCAAGTTGTCGTTGGCTACATGTTTCTTTCT	Contig800	147	39	32	28	48	40.8163	-48.6	-33.0612	-0.81
	bpe-miR169a-3p.C12G.ca	19	GGCAAGTTGTCGTTGGCTA	AGAAAGTATTATGCAGCCAAGAATGACTTGCCGACTCTTGCTGGCTAGCTAGTTTGTTTCCTCTTTATAATTCAAGTAGTACTACTGATCCAAAAACCGATCGATCAACCAAGTCGGCAAGTTGTCGTTGGCTACATGTTTCTTTCT	Contig800	147	39	32	28	48	40.8163	-48.6	-33.0612	-0.81
	bpe-miR169a-3p.C12G.A21T	21	GGCAAGTTGTCGTTGGCTACT	AGAAAGTATTATGCAGCCAAGAATGACTTGCCGACTCTTGCTGGCTAGCTAGTTTGTTTCCTCTTTATAATTCAAGTAGTACTACTGATCCAAAAACCGATCGATCAACCAAGTCGGCAAGTTGTCGTTGGCTACATGTTTCTTTCT	Contig800	147	39	32	28	48	40.8163	-48.6	-33.0612	-0.81
	bpe-miR169a-3p.gs.C11G.T	21	GCAAGTTGTCGTTGGCTACAT	AGAAAGTATTATGCAGCCAAGAATGACTTGCCGACTCTTGCTGGCTAGCTAGTTTGTTTCCTCTTTATAATTCAAGTAGTACTACTGATCCAAAAACCGATCGATCAACCAAGTCGGCAAGTTGTCGTTGGCTACATGTTTCTTTCT	Contig800	147	39	32	28	48	40.8163	-48.6	-33.0612	-0.81
	bpe-miR169a-3p.Cs.C12G	22	CGGCAAGTTGTCGTTGGCTACA	AGAAAGTATTATGCAGCCAAGAATGACTTGCCGACTCTTGCTGGCTAGCTAGTTTGTTTCCTCTTTATAATTCAAGTAGTACTACTGATCCAAAAACCGATCGATCAACCAAGTCGGCAAGTTGTCGTTGGCTACATGTTTCTTTCT	Contig800	147	39	32	28	48	40.8163	-48.6	-33.0612	-0.81
	bpe-miR169a-3p.C12G.G	22	GGCAAGTTGTCGTTGGCTACAG	AGAAAGTATTATGCAGCCAAGAATGACTTGCCGACTCTTGCTGGCTAGCTAGTTTGTTTCCTCTTTATAATTCAAGTAGTACTACTGATCCAAAAACCGATCGATCAACCAAGTCGGCAAGTTGTCGTTGGCTACATGTTTCTTTCT	Contig800	147	39	32	28	48	40.8163	-48.6	-33.0612	-0.81
	bpe-miR169a-3p.C12G.C20T	21	GGCAAGTTGTCGTTGGCTATA	AGAAAGTATTATGCAGCCAAGAATGACTTGCCGACTCTTGCTGGCTAGCTAGTTTGTTTCCTCTTTATAATTCAAGTAGTACTACTGATCCAAAAACCGATCGATCAACCAAGTCGGCAAGTTGTCGTTGGCTACATGTTTCTTTCT	Contig800	147	39	32	28	48	40.8163	-48.6	-33.0612	-0.81
	bpe-miR169a-3p.C12G.T14C	21	GGCAAGTTGTCGTCGGCTACA	AGAAAGTATTATGCAGCCAAGAATGACTTGCCGACTCTTGCTGGCTAGCTAGTTTGTTTCCTCTTTATAATTCAAGTAGTACTACTGATCCAAAAACCGATCGATCAACCAAGTCGGCAAGTTGTCGTTGGCTACATGTTTCTTTCT	Contig800	147	39	32	28	48	40.8163	-48.6	-33.0612	-0.81
	bpe-miR169a-3p.G2T.C12G	21	GTCAAGTTGTCGTTGGCTACA	AGAAAGTATTATGCAGCCAAGAATGACTTGCCGACTCTTGCTGGCTAGCTAGTTTGTTTCCTCTTTATAATTCAAGTAGTACTACTGATCCAAAAACCGATCGATCAACCAAGTCGGCAAGTTGTCGTTGGCTACATGTTTCTTTCT	Contig800	147	39	32	28	48	40.8163	-48.6	-33.0612	-0.81
	bpe-miR169a-3p.gs.C11G.G	21	GCAAGTTGTCGTTGGCTACAG	AGAAAGTATTATGCAGCCAAGAATGACTTGCCGACTCTTGCTGGCTAGCTAGTTTGTTTCCTCTTTATAATTCAAGTAGTACTACTGATCCAAAAACCGATCGATCAACCAAGTCGGCAAGTTGTCGTTGGCTACATGTTTCTTTCT	Contig800	147	39	32	28	48	40.8163	-48.6	-33.0612	-0.81
	bpe-miR169a-3p.gs.C11G.ca	18	GCAAGTTGTCGTTGGCTA	AGAAAGTATTATGCAGCCAAGAATGACTTGCCGACTCTTGCTGGCTAGCTAGTTTGTTTCCTCTTTATAATTCAAGTAGTACTACTGATCCAAAAACCGATCGATCAACCAAGTCGGCAAGTTGTCGTTGGCTACATGTTTCTTTCT	Contig800	147	39	32	28	48	40.8163	-48.6	-33.0612	-0.81
	bpe-miR169a-3p.ggs.C10G	19	CAAGTTGTCGTTGGCTACA	AGAAAGTATTATGCAGCCAAGAATGACTTGCCGACTCTTGCTGGCTAGCTAGTTTGTTTCCTCTTTATAATTCAAGTAGTACTACTGATCCAAAAACCGATCGATCAACCAAGTCGGCAAGTTGTCGTTGGCTACATGTTTCTTTCT	Contig800	147	39	32	28	48	40.8163	-48.6	-33.0612	-0.81
bpe-miR396g-5p	bpe-miR396g-5p.tcs.C1G.C2T.A3T.G6A.C7T.T8A.T9A.T10A.A11G.T12C.A15T.A16G.C17G.tg	17	GTTCAATAAAGCTGTGG	TTCCACAGCTTTCTTGAATTGTCTGTGTCATTTCTTTTGCATGGGATCACTTAATTTCCTCAGAAGAAATTAATTAAGCTCCCTAATACAGTTCAAGAAAGCTGTGGAA	Contig545	109	31	21	18	39	35.7798	-43.5	-39.9083	-1.11538	CATGTTTTCCCACGGCTTTCTTAAGCTTAGTACTTATTTTAATGGATAGGACGTACGAAAGCAGCAAGACCTAAAAGTACCAAGTTCAAGAAAGCCGTGGAAAAGCATG	Contig1060	109	37	21	23	28	40.367	-40.7	-37.3394	-0.925	AAAGTCCTGGTCATGCTTTTCCACAGCTTTCTTGAACTTTCTTTTGCTTCTTAATCTCTTCGATTAACACAAAATATGGAAGCTCAAGAAAGCTGTGGGACAACATGGCAATTCAGGATTTT	Contig126	122	34	25	21	42	37.7049	-52.5	-43.0328	-1.1413	TCTCTTCTACAAGAATTTTTGATGGCATTGCCAATTTTTTCAGGAAAGCTGTGGAAAAGA	Contig55	60	18	9	12	21	35	-16.1	-26.8333	-0.766667
	bpe-miR396g-5p.ts.C1G.C2T.C3T.A4C.C5A.G7T.C8A.T9A.T10A.T11G.A12C.T14G.G15T.A16G.A17G.C18G.tg	18	GTTCAATAAAGCTGTGGG	TTCCACAGCTTTCTTGAATTGTCTGTGTCATTTCTTTTGCATGGGATCACTTAATTTCCTCAGAAGAAATTAATTAAGCTCCCTAATACAGTTCAAGAAAGCTGTGGAA	Contig545	109	31	21	18	39	35.7798	-43.5	-39.9083	-1.11538	CATGTTTTCCCACGGCTTTCTTAAGCTTAGTACTTATTTTAATGGATAGGACGTACGAAAGCAGCAAGACCTAAAAGTACCAAGTTCAAGAAAGCCGTGGAAAAGCATG	Contig1060	109	37	21	23	28	40.367	-40.7	-37.3394	-0.925	AAAGTCCTGGTCATGCTTTTCCACAGCTTTCTTGAACTTTCTTTTGCTTCTTAATCTCTTCGATTAACACAAAATATGGAAGCTCAAGAAAGCTGTGGGACAACATGGCAATTCAGGATTTT	Contig126	122	34	25	21	42	37.7049	-52.5	-43.0328	-1.1413	TCTCTTCTACAAGAATTTTTGATGGCATTGCCAATTTTTTCAGGAAAGCTGTGGAAAAGA	Contig55	60	18	9	12	21	35	-16.1	-26.8333	-0.766667
	bpe-miR396g-5p.T1G.C2T.C3T.C6A.A7T.G8A.C9A.T10A.T11G.T12C.A13T.T14G.A17G.A18G.C19A.tg	19	GTTCAATAAAGCTGTGGGA	TTCCACAGCTTTCTTGAATTGTCTGTGTCATTTCTTTTGCATGGGATCACTTAATTTCCTCAGAAGAAATTAATTAAGCTCCCTAATACAGTTCAAGAAAGCTGTGGAA	Contig545	109	31	21	18	39	35.7798	-43.5	-39.9083	-1.11538	CATGTTTTCCCACGGCTTTCTTAAGCTTAGTACTTATTTTAATGGATAGGACGTACGAAAGCAGCAAGACCTAAAAGTACCAAGTTCAAGAAAGCCGTGGAAAAGCATG	Contig1060	109	37	21	23	28	40.367	-40.7	-37.3394	-0.925	AAAGTCCTGGTCATGCTTTTCCACAGCTTTCTTGAACTTTCTTTTGCTTCTTAATCTCTTCGATTAACACAAAATATGGAAGCTCAAGAAAGCTGTGGGACAACATGGCAATTCAGGATTTT	Contig126	122	34	25	21	42	37.7049	-52.5	-43.0328	-1.1413	TCTCTTCTACAAGAATTTTTGATGGCATTGCCAATTTTTTCAGGAAAGCTGTGGAAAAGA	Contig55	60	18	9	12	21	35	-16.1	-26.8333	-0.766667
	bpe-miR396g-5p.Gs.C2T.C4A.C6T.G8A.C9A.T10G.T11C.A13G.T15G.A17G.C19A.tg	20	GTTCAATAAAGCTGTGGGAA	TTCCACAGCTTTCTTGAATTGTCTGTGTCATTTCTTTTGCATGGGATCACTTAATTTCCTCAGAAGAAATTAATTAAGCTCCCTAATACAGTTCAAGAAAGCTGTGGAA	Contig545	109	31	21	18	39	35.7798	-43.5	-39.9083	-1.11538	CATGTTTTCCCACGGCTTTCTTAAGCTTAGTACTTATTTTAATGGATAGGACGTACGAAAGCAGCAAGACCTAAAAGTACCAAGTTCAAGAAAGCCGTGGAAAAGCATG	Contig1060	109	37	21	23	28	40.367	-40.7	-37.3394	-0.925	AAAGTCCTGGTCATGCTTTTCCACAGCTTTCTTGAACTTTCTTTTGCTTCTTAATCTCTTCGATTAACACAAAATATGGAAGCTCAAGAAAGCTGTGGGACAACATGGCAATTCAGGATTTT	Contig126	122	34	25	21	42	37.7049	-52.5	-43.0328	-1.1413	TCTCTTCTACAAGAATTTTTGATGGCATTGCCAATTTTTTCAGGAAAGCTGTGGAAAAGA	Contig55	60	18	9	12	21	35	-16.1	-26.8333	-0.766667
	bpe-miR396g-5p.Gs.TTs.T1C.C2A.C3A.C4T.C6A.T11G.A13G.T14G.T15G.G16A.A18T.C19G.tg	22	GTTCAATAAAGCTGTGGGAATG	TTCCACAGCTTTCTTGAATTGTCTGTGTCATTTCTTTTGCATGGGATCACTTAATTTCCTCAGAAGAAATTAATTAAGCTCCCTAATACAGTTCAAGAAAGCTGTGGAA	Contig545	109	31	21	18	39	35.7798	-43.5	-39.9083	-1.11538	CATGTTTTCCCACGGCTTTCTTAAGCTTAGTACTTATTTTAATGGATAGGACGTACGAAAGCAGCAAGACCTAAAAGTACCAAGTTCAAGAAAGCCGTGGAAAAGCATG	Contig1060	109	37	21	23	28	40.367	-40.7	-37.3394	-0.925	AAAGTCCTGGTCATGCTTTTCCACAGCTTTCTTGAACTTTCTTTTGCTTCTTAATCTCTTCGATTAACACAAAATATGGAAGCTCAAGAAAGCTGTGGGACAACATGGCAATTCAGGATTTT	Contig126	122	34	25	21	42	37.7049	-52.5	-43.0328	-1.1413	TCTCTTCTACAAGAATTTTTGATGGCATTGCCAATTTTTTCAGGAAAGCTGTGGAAAAGA	Contig55	60	18	9	12	21	35	-16.1	-26.8333	-0.766667
	bpe-miR396g-5p.Ts.C4T.T12C.g	21	TTCCTACAGCTTCATTGAACT	TTCCACAGCTTTCTTGAATTGTCTGTGTCATTTCTTTTGCATGGGATCACTTAATTTCCTCAGAAGAAATTAATTAAGCTCCCTAATACAGTTCAAGAAAGCTGTGGAA	Contig545	109	31	21	18	39	35.7798	-43.5	-39.9083	-1.11538	CATGTTTTCCCACGGCTTTCTTAAGCTTAGTACTTATTTTAATGGATAGGACGTACGAAAGCAGCAAGACCTAAAAGTACCAAGTTCAAGAAAGCCGTGGAAAAGCATG	Contig1060	109	37	21	23	28	40.367	-40.7	-37.3394	-0.925	AAAGTCCTGGTCATGCTTTTCCACAGCTTTCTTGAACTTTCTTTTGCTTCTTAATCTCTTCGATTAACACAAAATATGGAAGCTCAAGAAAGCTGTGGGACAACATGGCAATTCAGGATTTT	Contig126	122	34	25	21	42	37.7049	-52.5	-43.0328	-1.1413	TCTCTTCTACAAGAATTTTTGATGGCATTGCCAATTTTTTCAGGAAAGCTGTGGAAAAGA	Contig55	60	18	9	12	21	35	-16.1	-26.8333	-0.766667
	bpe-miR396g-5p.ts.C1G.C2T.C3T.A4C.C5A.G7T.C8A.T9A.T10A.T11G.A12C.T14G.G15T.A16C.A17G.C18G.tg	18	GTTCAATAAAGCTGTCGG	TTCCACAGCTTTCTTGAATTGTCTGTGTCATTTCTTTTGCATGGGATCACTTAATTTCCTCAGAAGAAATTAATTAAGCTCCCTAATACAGTTCAAGAAAGCTGTGGAA	Contig545	109	31	21	18	39	35.7798	-43.5	-39.9083	-1.11538	CATGTTTTCCCACGGCTTTCTTAAGCTTAGTACTTATTTTAATGGATAGGACGTACGAAAGCAGCAAGACCTAAAAGTACCAAGTTCAAGAAAGCCGTGGAAAAGCATG	Contig1060	109	37	21	23	28	40.367	-40.7	-37.3394	-0.925	AAAGTCCTGGTCATGCTTTTCCACAGCTTTCTTGAACTTTCTTTTGCTTCTTAATCTCTTCGATTAACACAAAATATGGAAGCTCAAGAAAGCTGTGGGACAACATGGCAATTCAGGATTTT	Contig126	122	34	25	21	42	37.7049	-52.5	-43.0328	-1.1413	TCTCTTCTACAAGAATTTTTGATGGCATTGCCAATTTTTTCAGGAAAGCTGTGGAAAAGA	Contig55	60	18	9	12	21	35	-16.1	-26.8333	-0.766667
bpe-miR165a-3p	bpe-miR165a-3p	20	TCGGACCAGGCTTCATCCCC	TTTGAGGGGAATGTCGGCTGGCTCGAGGCTTTTTGGCTTTTGGCATGGGTGGTTTTCTCATGAAAAAAAGAACTCTTAAGGCTTCGGACCAGGCTTCATTCCCCTCAAA	Contig2096	109	23	22	30	34	47.7064	-53.1	-48.7156	-1.02115	GGGGAGGATGAAAAGTGAAGGTCTGGTGTGGGGAATGTTGTCTGGCTCGAGGCCACCAATAGACTGAATGATGACGTTCAGTTTGAGAGAGTTTTCTCGGACCAGGCTTCATTCCCCTCACTATCTTCTCTTTCTCTATCATTTTCTCT	Contig1055	149	31	31	39	48	46.9799	-69.8	-46.8456	-0.997143	GGTTGAGGGGAATGCTGTCTGGTTCGAGACCATTTCTCAGAAGCAAAAACAGAGCATCTTTCAAATGATCTCGGACCAGGCTTCATTCCCCCCCAACT	Contig1270	122	34	25	21	42	37.7049	-52.5	-43.0328	-1.1413	GGAAGCAACAATTGAGGGGAATGAAGCCTGGTCCGAGGGCACTGACACTTATACAATCAATTTATGATCATCTGACAGATTTCGAAGAAAACGATGAGGTGACTCGGCCTTGGACCAGGCGACATTCCCCTCGAGAGAAAGCTTCC	Contig984	146	45	33	38	30	48.6301	-68.3	-46.7808	-0.961972	GTTGAGGGGAATGAAGCCTGGTCCGAAATCATTCAGATGAGCTTATACTTTGCATGAATGATCTCGAACCAGACGACATTCCCCTCAAC	Contig50
	bpe-miR165a-3p.c	19	TCGGACCAGGCTTCATCCC	TTTGAGGGGAATGTCGGCTGGCTCGAGGCTTTTTGGCTTTTGGCATGGGTGGTTTTCTCATGAAAAAAAGAACTCTTAAGGCTTCGGACCAGGCTTCATTCCCCTCAAA	Contig2096	109	23	22	30	34	47.7064	-53.1	-48.7156	-1.02115	GGGGAGGATGAAAAGTGAAGGTCTGGTGTGGGGAATGTTGTCTGGCTCGAGGCCACCAATAGACTGAATGATGACGTTCAGTTTGAGAGAGTTTTCTCGGACCAGGCTTCATTCCCCTCACTATCTTCTCTTTCTCTATCATTTTCTCT	Contig1055	149	31	31	39	48	46.9799	-69.8	-46.8456	-0.997143	GGTTGAGGGGAATGCTGTCTGGTTCGAGACCATTTCTCAGAAGCAAAAACAGAGCATCTTTCAAATGATCTCGGACCAGGCTTCATTCCCCCCCAACT	Contig1270	122	34	25	21	42	37.7049	-52.5	-43.0328	-1.1413	GGAAGCAACAATTGAGGGGAATGAAGCCTGGTCCGAGGGCACTGACACTTATACAATCAATTTATGATCATCTGACAGATTTCGAAGAAAACGATGAGGTGACTCGGCCTTGGACCAGGCGACATTCCCCTCGAGAGAAAGCTTCC	Contig984	146	45	33	38	30	48.6301	-68.3	-46.7808	-0.961972	GTTGAGGGGAATGAAGCCTGGTCCGAAATCATTCAGATGAGCTTATACTTTGCATGAATGATCTCGAACCAGACGACATTCCCCTCAAC	Contig50
	bpe-miR165a-3p.Gs	21	GTCGGACCAGGCTTCATCCCC	TTTGAGGGGAATGTCGGCTGGCTCGAGGCTTTTTGGCTTTTGGCATGGGTGGTTTTCTCATGAAAAAAAGAACTCTTAAGGCTTCGGACCAGGCTTCATTCCCCTCAAA	Contig2096	109	23	22	30	34	47.7064	-53.1	-48.7156	-1.02115	GGGGAGGATGAAAAGTGAAGGTCTGGTGTGGGGAATGTTGTCTGGCTCGAGGCCACCAATAGACTGAATGATGACGTTCAGTTTGAGAGAGTTTTCTCGGACCAGGCTTCATTCCCCTCACTATCTTCTCTTTCTCTATCATTTTCTCT	Contig1055	149	31	31	39	48	46.9799	-69.8	-46.8456	-0.997143	GGTTGAGGGGAATGCTGTCTGGTTCGAGACCATTTCTCAGAAGCAAAAACAGAGCATCTTTCAAATGATCTCGGACCAGGCTTCATTCCCCCCCAACT	Contig1270	122	34	25	21	42	37.7049	-52.5	-43.0328	-1.1413	GGAAGCAACAATTGAGGGGAATGAAGCCTGGTCCGAGGGCACTGACACTTATACAATCAATTTATGATCATCTGACAGATTTCGAAGAAAACGATGAGGTGACTCGGCCTTGGACCAGGCGACATTCCCCTCGAGAGAAAGCTTCC	Contig984	146	45	33	38	30	48.6301	-68.3	-46.7808	-0.961972	GTTGAGGGGAATGAAGCCTGGTCCGAAATCATTCAGATGAGCTTATACTTTGCATGAATGATCTCGAACCAGACGACATTCCCCTCAAC	Contig50
	bpe-miR165a-3p.cc	18	TCGGACCAGGCTTCATCC	TTTGAGGGGAATGTCGGCTGGCTCGAGGCTTTTTGGCTTTTGGCATGGGTGGTTTTCTCATGAAAAAAAGAACTCTTAAGGCTTCGGACCAGGCTTCATTCCCCTCAAA	Contig2096	109	23	22	30	34	47.7064	-53.1	-48.7156	-1.02115	GGGGAGGATGAAAAGTGAAGGTCTGGTGTGGGGAATGTTGTCTGGCTCGAGGCCACCAATAGACTGAATGATGACGTTCAGTTTGAGAGAGTTTTCTCGGACCAGGCTTCATTCCCCTCACTATCTTCTCTTTCTCTATCATTTTCTCT	Contig1055	149	31	31	39	48	46.9799	-69.8	-46.8456	-0.997143	GGTTGAGGGGAATGCTGTCTGGTTCGAGACCATTTCTCAGAAGCAAAAACAGAGCATCTTTCAAATGATCTCGGACCAGGCTTCATTCCCCCCCAACT	Contig1270	122	34	25	21	42	37.7049	-52.5	-43.0328	-1.1413	GGAAGCAACAATTGAGGGGAATGAAGCCTGGTCCGAGGGCACTGACACTTATACAATCAATTTATGATCATCTGACAGATTTCGAAGAAAACGATGAGGTGACTCGGCCTTGGACCAGGCGACATTCCCCTCGAGAGAAAGCTTCC	Contig984	146	45	33	38	30	48.6301	-68.3	-46.7808	-0.961972	GTTGAGGGGAATGAAGCCTGGTCCGAAATCATTCAGATGAGCTTATACTTTGCATGAATGATCTCGAACCAGACGACATTCCCCTCAAC	Contig50
	bpe-miR165a-3p.Gs.c	20	GTCGGACCAGGCTTCATCCC	TTTGAGGGGAATGTCGGCTGGCTCGAGGCTTTTTGGCTTTTGGCATGGGTGGTTTTCTCATGAAAAAAAGAACTCTTAAGGCTTCGGACCAGGCTTCATTCCCCTCAAA	Contig2096	109	23	22	30	34	47.7064	-53.1	-48.7156	-1.02115	GGGGAGGATGAAAAGTGAAGGTCTGGTGTGGGGAATGTTGTCTGGCTCGAGGCCACCAATAGACTGAATGATGACGTTCAGTTTGAGAGAGTTTTCTCGGACCAGGCTTCATTCCCCTCACTATCTTCTCTTTCTCTATCATTTTCTCT	Contig1055	149	31	31	39	48	46.9799	-69.8	-46.8456	-0.997143	GGTTGAGGGGAATGCTGTCTGGTTCGAGACCATTTCTCAGAAGCAAAAACAGAGCATCTTTCAAATGATCTCGGACCAGGCTTCATTCCCCCCCAACT	Contig1270	122	34	25	21	42	37.7049	-52.5	-43.0328	-1.1413	GGAAGCAACAATTGAGGGGAATGAAGCCTGGTCCGAGGGCACTGACACTTATACAATCAATTTATGATCATCTGACAGATTTCGAAGAAAACGATGAGGTGACTCGGCCTTGGACCAGGCGACATTCCCCTCGAGAGAAAGCTTCC	Contig984	146	45	33	38	30	48.6301	-68.3	-46.7808	-0.961972	GTTGAGGGGAATGAAGCCTGGTCCGAAATCATTCAGATGAGCTTATACTTTGCATGAATGATCTCGAACCAGACGACATTCCCCTCAAC	Contig50
	bpe-miR165a-3p.Ts	21	TTCGGACCAGGCTTCATCCCC	TTTGAGGGGAATGTCGGCTGGCTCGAGGCTTTTTGGCTTTTGGCATGGGTGGTTTTCTCATGAAAAAAAGAACTCTTAAGGCTTCGGACCAGGCTTCATTCCCCTCAAA	Contig2096	109	23	22	30	34	47.7064	-53.1	-48.7156	-1.02115	GGGGAGGATGAAAAGTGAAGGTCTGGTGTGGGGAATGTTGTCTGGCTCGAGGCCACCAATAGACTGAATGATGACGTTCAGTTTGAGAGAGTTTTCTCGGACCAGGCTTCATTCCCCTCACTATCTTCTCTTTCTCTATCATTTTCTCT	Contig1055	149	31	31	39	48	46.9799	-69.8	-46.8456	-0.997143	GGTTGAGGGGAATGCTGTCTGGTTCGAGACCATTTCTCAGAAGCAAAAACAGAGCATCTTTCAAATGATCTCGGACCAGGCTTCATTCCCCCCCAACT	Contig1270	122	34	25	21	42	37.7049	-52.5	-43.0328	-1.1413	GGAAGCAACAATTGAGGGGAATGAAGCCTGGTCCGAGGGCACTGACACTTATACAATCAATTTATGATCATCTGACAGATTTCGAAGAAAACGATGAGGTGACTCGGCCTTGGACCAGGCGACATTCCCCTCGAGAGAAAGCTTCC	Contig984	146	45	33	38	30	48.6301	-68.3	-46.7808	-0.961972	GTTGAGGGGAATGAAGCCTGGTCCGAAATCATTCAGATGAGCTTATACTTTGCATGAATGATCTCGAACCAGACGACATTCCCCTCAAC	Contig50
	bpe-miR165a-3p.A15T	20	TCGGACCAGGCTTCTTCCCC	TTTGAGGGGAATGTCGGCTGGCTCGAGGCTTTTTGGCTTTTGGCATGGGTGGTTTTCTCATGAAAAAAAGAACTCTTAAGGCTTCGGACCAGGCTTCATTCCCCTCAAA	Contig2096	109	23	22	30	34	47.7064	-53.1	-48.7156	-1.02115	GGGGAGGATGAAAAGTGAAGGTCTGGTGTGGGGAATGTTGTCTGGCTCGAGGCCACCAATAGACTGAATGATGACGTTCAGTTTGAGAGAGTTTTCTCGGACCAGGCTTCATTCCCCTCACTATCTTCTCTTTCTCTATCATTTTCTCT	Contig1055	149	31	31	39	48	46.9799	-69.8	-46.8456	-0.997143	GGTTGAGGGGAATGCTGTCTGGTTCGAGACCATTTCTCAGAAGCAAAAACAGAGCATCTTTCAAATGATCTCGGACCAGGCTTCATTCCCCCCCAACT	Contig1270	122	34	25	21	42	37.7049	-52.5	-43.0328	-1.1413	GGAAGCAACAATTGAGGGGAATGAAGCCTGGTCCGAGGGCACTGACACTTATACAATCAATTTATGATCATCTGACAGATTTCGAAGAAAACGATGAGGTGACTCGGCCTTGGACCAGGCGACATTCCCCTCGAGAGAAAGCTTCC	Contig984	146	45	33	38	30	48.6301	-68.3	-46.7808	-0.961972	GTTGAGGGGAATGAAGCCTGGTCCGAAATCATTCAGATGAGCTTATACTTTGCATGAATGATCTCGAACCAGACGACATTCCCCTCAAC	Contig50
	bpe-miR165a-3p.As	21	ATCGGACCAGGCTTCATCCCC	TTTGAGGGGAATGTCGGCTGGCTCGAGGCTTTTTGGCTTTTGGCATGGGTGGTTTTCTCATGAAAAAAAGAACTCTTAAGGCTTCGGACCAGGCTTCATTCCCCTCAAA	Contig2096	109	23	22	30	34	47.7064	-53.1	-48.7156	-1.02115	GGGGAGGATGAAAAGTGAAGGTCTGGTGTGGGGAATGTTGTCTGGCTCGAGGCCACCAATAGACTGAATGATGACGTTCAGTTTGAGAGAGTTTTCTCGGACCAGGCTTCATTCCCCTCACTATCTTCTCTTTCTCTATCATTTTCTCT	Contig1055	149	31	31	39	48	46.9799	-69.8	-46.8456	-0.997143	GGTTGAGGGGAATGCTGTCTGGTTCGAGACCATTTCTCAGAAGCAAAAACAGAGCATCTTTCAAATGATCTCGGACCAGGCTTCATTCCCCCCCAACT	Contig1270	122	34	25	21	42	37.7049	-52.5	-43.0328	-1.1413	GGAAGCAACAATTGAGGGGAATGAAGCCTGGTCCGAGGGCACTGACACTTATACAATCAATTTATGATCATCTGACAGATTTCGAAGAAAACGATGAGGTGACTCGGCCTTGGACCAGGCGACATTCCCCTCGAGAGAAAGCTTCC	Contig984	146	45	33	38	30	48.6301	-68.3	-46.7808	-0.961972	GTTGAGGGGAATGAAGCCTGGTCCGAAATCATTCAGATGAGCTTATACTTTGCATGAATGATCTCGAACCAGACGACATTCCCCTCAAC	Contig50
	bpe-miR165a-3p.CGs.cc	20	CGTCGGACCAGGCTTCATCC	TTTGAGGGGAATGTCGGCTGGCTCGAGGCTTTTTGGCTTTTGGCATGGGTGGTTTTCTCATGAAAAAAAGAACTCTTAAGGCTTCGGACCAGGCTTCATTCCCCTCAAA	Contig2096	109	23	22	30	34	47.7064	-53.1	-48.7156	-1.02115	GGGGAGGATGAAAAGTGAAGGTCTGGTGTGGGGAATGTTGTCTGGCTCGAGGCCACCAATAGACTGAATGATGACGTTCAGTTTGAGAGAGTTTTCTCGGACCAGGCTTCATTCCCCTCACTATCTTCTCTTTCTCTATCATTTTCTCT	Contig1055	149	31	31	39	48	46.9799	-69.8	-46.8456	-0.997143	GGTTGAGGGGAATGCTGTCTGGTTCGAGACCATTTCTCAGAAGCAAAAACAGAGCATCTTTCAAATGATCTCGGACCAGGCTTCATTCCCCCCCAACT	Contig1270	122	34	25	21	42	37.7049	-52.5	-43.0328	-1.1413	GGAAGCAACAATTGAGGGGAATGAAGCCTGGTCCGAGGGCACTGACACTTATACAATCAATTTATGATCATCTGACAGATTTCGAAGAAAACGATGAGGTGACTCGGCCTTGGACCAGGCGACATTCCCCTCGAGAGAAAGCTTCC	Contig984	146	45	33	38	30	48.6301	-68.3	-46.7808	-0.961972	GTTGAGGGGAATGAAGCCTGGTCCGAAATCATTCAGATGAGCTTATACTTTGCATGAATGATCTCGAACCAGACGACATTCCCCTCAAC	Contig50
	bpe-miR165a-3p.AGs	22	AGTCGGACCAGGCTTCATCCCC	TTTGAGGGGAATGTCGGCTGGCTCGAGGCTTTTTGGCTTTTGGCATGGGTGGTTTTCTCATGAAAAAAAGAACTCTTAAGGCTTCGGACCAGGCTTCATTCCCCTCAAA	Contig2096	109	23	22	30	34	47.7064	-53.1	-48.7156	-1.02115	GGGGAGGATGAAAAGTGAAGGTCTGGTGTGGGGAATGTTGTCTGGCTCGAGGCCACCAATAGACTGAATGATGACGTTCAGTTTGAGAGAGTTTTCTCGGACCAGGCTTCATTCCCCTCACTATCTTCTCTTTCTCTATCATTTTCTCT	Contig1055	149	31	31	39	48	46.9799	-69.8	-46.8456	-0.997143	GGTTGAGGGGAATGCTGTCTGGTTCGAGACCATTTCTCAGAAGCAAAAACAGAGCATCTTTCAAATGATCTCGGACCAGGCTTCATTCCCCCCCAACT	Contig1270	122	34	25	21	42	37.7049	-52.5	-43.0328	-1.1413	GGAAGCAACAATTGAGGGGAATGAAGCCTGGTCCGAGGGCACTGACACTTATACAATCAATTTATGATCATCTGACAGATTTCGAAGAAAACGATGAGGTGACTCGGCCTTGGACCAGGCGACATTCCCCTCGAGAGAAAGCTTCC	Contig984	146	45	33	38	30	48.6301	-68.3	-46.7808	-0.961972	GTTGAGGGGAATGAAGCCTGGTCCGAAATCATTCAGATGAGCTTATACTTTGCATGAATGATCTCGAACCAGACGACATTCCCCTCAAC	Contig50
	bpe-miR165a-3p.Gs.Ts	22	GTTCGGACCAGGCTTCATCCCC	TTTGAGGGGAATGTCGGCTGGCTCGAGGCTTTTTGGCTTTTGGCATGGGTGGTTTTCTCATGAAAAAAAGAACTCTTAAGGCTTCGGACCAGGCTTCATTCCCCTCAAA	Contig2096	109	23	22	30	34	47.7064	-53.1	-48.7156	-1.02115	GGGGAGGATGAAAAGTGAAGGTCTGGTGTGGGGAATGTTGTCTGGCTCGAGGCCACCAATAGACTGAATGATGACGTTCAGTTTGAGAGAGTTTTCTCGGACCAGGCTTCATTCCCCTCACTATCTTCTCTTTCTCTATCATTTTCTCT	Contig1055	149	31	31	39	48	46.9799	-69.8	-46.8456	-0.997143	GGTTGAGGGGAATGCTGTCTGGTTCGAGACCATTTCTCAGAAGCAAAAACAGAGCATCTTTCAAATGATCTCGGACCAGGCTTCATTCCCCCCCAACT	Contig1270	122	34	25	21	42	37.7049	-52.5	-43.0328	-1.1413	GGAAGCAACAATTGAGGGGAATGAAGCCTGGTCCGAGGGCACTGACACTTATACAATCAATTTATGATCATCTGACAGATTTCGAAGAAAACGATGAGGTGACTCGGCCTTGGACCAGGCGACATTCCCCTCGAGAGAAAGCTTCC	Contig984	146	45	33	38	30	48.6301	-68.3	-46.7808	-0.961972	GTTGAGGGGAATGAAGCCTGGTCCGAAATCATTCAGATGAGCTTATACTTTGCATGAATGATCTCGAACCAGACGACATTCCCCTCAAC	Contig50
	bpe-miR165a-3p.As.G	22	ATCGGACCAGGCTTCATCCCCG	TTTGAGGGGAATGTCGGCTGGCTCGAGGCTTTTTGGCTTTTGGCATGGGTGGTTTTCTCATGAAAAAAAGAACTCTTAAGGCTTCGGACCAGGCTTCATTCCCCTCAAA	Contig2096	109	23	22	30	34	47.7064	-53.1	-48.7156	-1.02115	GGGGAGGATGAAAAGTGAAGGTCTGGTGTGGGGAATGTTGTCTGGCTCGAGGCCACCAATAGACTGAATGATGACGTTCAGTTTGAGAGAGTTTTCTCGGACCAGGCTTCATTCCCCTCACTATCTTCTCTTTCTCTATCATTTTCTCT	Contig1055	149	31	31	39	48	46.9799	-69.8	-46.8456	-0.997143	GGTTGAGGGGAATGCTGTCTGGTTCGAGACCATTTCTCAGAAGCAAAAACAGAGCATCTTTCAAATGATCTCGGACCAGGCTTCATTCCCCCCCAACT	Contig1270	122	34	25	21	42	37.7049	-52.5	-43.0328	-1.1413	GGAAGCAACAATTGAGGGGAATGAAGCCTGGTCCGAGGGCACTGACACTTATACAATCAATTTATGATCATCTGACAGATTTCGAAGAAAACGATGAGGTGACTCGGCCTTGGACCAGGCGACATTCCCCTCGAGAGAAAGCTTCC	Contig984	146	45	33	38	30	48.6301	-68.3	-46.7808	-0.961972	GTTGAGGGGAATGAAGCCTGGTCCGAAATCATTCAGATGAGCTTATACTTTGCATGAATGATCTCGAACCAGACGACATTCCCCTCAAC	Contig50
	bpe-miR165a-3p.Gs.cc	19	GTCGGACCAGGCTTCATCC	TTTGAGGGGAATGTCGGCTGGCTCGAGGCTTTTTGGCTTTTGGCATGGGTGGTTTTCTCATGAAAAAAAGAACTCTTAAGGCTTCGGACCAGGCTTCATTCCCCTCAAA	Contig2096	109	23	22	30	34	47.7064	-53.1	-48.7156	-1.02115	GGGGAGGATGAAAAGTGAAGGTCTGGTGTGGGGAATGTTGTCTGGCTCGAGGCCACCAATAGACTGAATGATGACGTTCAGTTTGAGAGAGTTTTCTCGGACCAGGCTTCATTCCCCTCACTATCTTCTCTTTCTCTATCATTTTCTCT	Contig1055	149	31	31	39	48	46.9799	-69.8	-46.8456	-0.997143	GGTTGAGGGGAATGCTGTCTGGTTCGAGACCATTTCTCAGAAGCAAAAACAGAGCATCTTTCAAATGATCTCGGACCAGGCTTCATTCCCCCCCAACT	Contig1270	122	34	25	21	42	37.7049	-52.5	-43.0328	-1.1413	GGAAGCAACAATTGAGGGGAATGAAGCCTGGTCCGAGGGCACTGACACTTATACAATCAATTTATGATCATCTGACAGATTTCGAAGAAAACGATGAGGTGACTCGGCCTTGGACCAGGCGACATTCCCCTCGAGAGAAAGCTTCC	Contig984	146	45	33	38	30	48.6301	-68.3	-46.7808	-0.961972	GTTGAGGGGAATGAAGCCTGGTCCGAAATCATTCAGATGAGCTTATACTTTGCATGAATGATCTCGAACCAGACGACATTCCCCTCAAC	Contig50
	bpe-miR165a-3p.As.C20T	21	ATCGGACCAGGCTTCATCCCT	TTTGAGGGGAATGTCGGCTGGCTCGAGGCTTTTTGGCTTTTGGCATGGGTGGTTTTCTCATGAAAAAAAGAACTCTTAAGGCTTCGGACCAGGCTTCATTCCCCTCAAA	Contig2096	109	23	22	30	34	47.7064	-53.1	-48.7156	-1.02115	GGGGAGGATGAAAAGTGAAGGTCTGGTGTGGGGAATGTTGTCTGGCTCGAGGCCACCAATAGACTGAATGATGACGTTCAGTTTGAGAGAGTTTTCTCGGACCAGGCTTCATTCCCCTCACTATCTTCTCTTTCTCTATCATTTTCTCT	Contig1055	149	31	31	39	48	46.9799	-69.8	-46.8456	-0.997143	GGTTGAGGGGAATGCTGTCTGGTTCGAGACCATTTCTCAGAAGCAAAAACAGAGCATCTTTCAAATGATCTCGGACCAGGCTTCATTCCCCCCCAACT	Contig1270	122	34	25	21	42	37.7049	-52.5	-43.0328	-1.1413	GGAAGCAACAATTGAGGGGAATGAAGCCTGGTCCGAGGGCACTGACACTTATACAATCAATTTATGATCATCTGACAGATTTCGAAGAAAACGATGAGGTGACTCGGCCTTGGACCAGGCGACATTCCCCTCGAGAGAAAGCTTCC	Contig984	146	45	33	38	30	48.6301	-68.3	-46.7808	-0.961972	GTTGAGGGGAATGAAGCCTGGTCCGAAATCATTCAGATGAGCTTATACTTTGCATGAATGATCTCGAACCAGACGACATTCCCCTCAAC	Contig50
	bpe-miR165a-3p.Gs.A15T	21	GTCGGACCAGGCTTCTTCCCC	TTTGAGGGGAATGTCGGCTGGCTCGAGGCTTTTTGGCTTTTGGCATGGGTGGTTTTCTCATGAAAAAAAGAACTCTTAAGGCTTCGGACCAGGCTTCATTCCCCTCAAA	Contig2096	109	23	22	30	34	47.7064	-53.1	-48.7156	-1.02115	GGGGAGGATGAAAAGTGAAGGTCTGGTGTGGGGAATGTTGTCTGGCTCGAGGCCACCAATAGACTGAATGATGACGTTCAGTTTGAGAGAGTTTTCTCGGACCAGGCTTCATTCCCCTCACTATCTTCTCTTTCTCTATCATTTTCTCT	Contig1055	149	31	31	39	48	46.9799	-69.8	-46.8456	-0.997143	GGTTGAGGGGAATGCTGTCTGGTTCGAGACCATTTCTCAGAAGCAAAAACAGAGCATCTTTCAAATGATCTCGGACCAGGCTTCATTCCCCCCCAACT	Contig1270	122	34	25	21	42	37.7049	-52.5	-43.0328	-1.1413	GGAAGCAACAATTGAGGGGAATGAAGCCTGGTCCGAGGGCACTGACACTTATACAATCAATTTATGATCATCTGACAGATTTCGAAGAAAACGATGAGGTGACTCGGCCTTGGACCAGGCGACATTCCCCTCGAGAGAAAGCTTCC	Contig984	146	45	33	38	30	48.6301	-68.3	-46.7808	-0.961972	GTTGAGGGGAATGAAGCCTGGTCCGAAATCATTCAGATGAGCTTATACTTTGCATGAATGATCTCGAACCAGACGACATTCCCCTCAAC	Contig50
	bpe-miR165a-3p.Cs.c	20	CTCGGACCAGGCTTCATCCC	TTTGAGGGGAATGTCGGCTGGCTCGAGGCTTTTTGGCTTTTGGCATGGGTGGTTTTCTCATGAAAAAAAGAACTCTTAAGGCTTCGGACCAGGCTTCATTCCCCTCAAA	Contig2096	109	23	22	30	34	47.7064	-53.1	-48.7156	-1.02115	GGGGAGGATGAAAAGTGAAGGTCTGGTGTGGGGAATGTTGTCTGGCTCGAGGCCACCAATAGACTGAATGATGACGTTCAGTTTGAGAGAGTTTTCTCGGACCAGGCTTCATTCCCCTCACTATCTTCTCTTTCTCTATCATTTTCTCT	Contig1055	149	31	31	39	48	46.9799	-69.8	-46.8456	-0.997143	GGTTGAGGGGAATGCTGTCTGGTTCGAGACCATTTCTCAGAAGCAAAAACAGAGCATCTTTCAAATGATCTCGGACCAGGCTTCATTCCCCCCCAACT	Contig1270	122	34	25	21	42	37.7049	-52.5	-43.0328	-1.1413	GGAAGCAACAATTGAGGGGAATGAAGCCTGGTCCGAGGGCACTGACACTTATACAATCAATTTATGATCATCTGACAGATTTCGAAGAAAACGATGAGGTGACTCGGCCTTGGACCAGGCGACATTCCCCTCGAGAGAAAGCTTCC	Contig984	146	45	33	38	30	48.6301	-68.3	-46.7808	-0.961972	GTTGAGGGGAATGAAGCCTGGTCCGAAATCATTCAGATGAGCTTATACTTTGCATGAATGATCTCGAACCAGACGACATTCCCCTCAAC	Contig50
	bpe-miR165a-3p.T16C	20	TCGGACCAGGCTTCACCCCC	TTTGAGGGGAATGTCGGCTGGCTCGAGGCTTTTTGGCTTTTGGCATGGGTGGTTTTCTCATGAAAAAAAGAACTCTTAAGGCTTCGGACCAGGCTTCATTCCCCTCAAA	Contig2096	109	23	22	30	34	47.7064	-53.1	-48.7156	-1.02115	GGGGAGGATGAAAAGTGAAGGTCTGGTGTGGGGAATGTTGTCTGGCTCGAGGCCACCAATAGACTGAATGATGACGTTCAGTTTGAGAGAGTTTTCTCGGACCAGGCTTCATTCCCCTCACTATCTTCTCTTTCTCTATCATTTTCTCT	Contig1055	149	31	31	39	48	46.9799	-69.8	-46.8456	-0.997143	GGTTGAGGGGAATGCTGTCTGGTTCGAGACCATTTCTCAGAAGCAAAAACAGAGCATCTTTCAAATGATCTCGGACCAGGCTTCATTCCCCCCCAACT	Contig1270	122	34	25	21	42	37.7049	-52.5	-43.0328	-1.1413	GGAAGCAACAATTGAGGGGAATGAAGCCTGGTCCGAGGGCACTGACACTTATACAATCAATTTATGATCATCTGACAGATTTCGAAGAAAACGATGAGGTGACTCGGCCTTGGACCAGGCGACATTCCCCTCGAGAGAAAGCTTCC	Contig984	146	45	33	38	30	48.6301	-68.3	-46.7808	-0.961972	GTTGAGGGGAATGAAGCCTGGTCCGAAATCATTCAGATGAGCTTATACTTTGCATGAATGATCTCGAACCAGACGACATTCCCCTCAAC	Contig50
	bpe-miR165a-3p.T16C.c	19	TCGGACCAGGCTTCACCCC	TTTGAGGGGAATGTCGGCTGGCTCGAGGCTTTTTGGCTTTTGGCATGGGTGGTTTTCTCATGAAAAAAAGAACTCTTAAGGCTTCGGACCAGGCTTCATTCCCCTCAAA	Contig2096	109	23	22	30	34	47.7064	-53.1	-48.7156	-1.02115	GGGGAGGATGAAAAGTGAAGGTCTGGTGTGGGGAATGTTGTCTGGCTCGAGGCCACCAATAGACTGAATGATGACGTTCAGTTTGAGAGAGTTTTCTCGGACCAGGCTTCATTCCCCTCACTATCTTCTCTTTCTCTATCATTTTCTCT	Contig1055	149	31	31	39	48	46.9799	-69.8	-46.8456	-0.997143	GGTTGAGGGGAATGCTGTCTGGTTCGAGACCATTTCTCAGAAGCAAAAACAGAGCATCTTTCAAATGATCTCGGACCAGGCTTCATTCCCCCCCAACT	Contig1270	122	34	25	21	42	37.7049	-52.5	-43.0328	-1.1413	GGAAGCAACAATTGAGGGGAATGAAGCCTGGTCCGAGGGCACTGACACTTATACAATCAATTTATGATCATCTGACAGATTTCGAAGAAAACGATGAGGTGACTCGGCCTTGGACCAGGCGACATTCCCCTCGAGAGAAAGCTTCC	Contig984	146	45	33	38	30	48.6301	-68.3	-46.7808	-0.961972	GTTGAGGGGAATGAAGCCTGGTCCGAAATCATTCAGATGAGCTTATACTTTGCATGAATGATCTCGAACCAGACGACATTCCCCTCAAC	Contig50
	bpe-miR165a-3p.G3T	20	TCTGACCAGGCTTCATCCCC	TTTGAGGGGAATGTCGGCTGGCTCGAGGCTTTTTGGCTTTTGGCATGGGTGGTTTTCTCATGAAAAAAAGAACTCTTAAGGCTTCGGACCAGGCTTCATTCCCCTCAAA	Contig2096	109	23	22	30	34	47.7064	-53.1	-48.7156	-1.02115	GGGGAGGATGAAAAGTGAAGGTCTGGTGTGGGGAATGTTGTCTGGCTCGAGGCCACCAATAGACTGAATGATGACGTTCAGTTTGAGAGAGTTTTCTCGGACCAGGCTTCATTCCCCTCACTATCTTCTCTTTCTCTATCATTTTCTCT	Contig1055	149	31	31	39	48	46.9799	-69.8	-46.8456	-0.997143	GGTTGAGGGGAATGCTGTCTGGTTCGAGACCATTTCTCAGAAGCAAAAACAGAGCATCTTTCAAATGATCTCGGACCAGGCTTCATTCCCCCCCAACT	Contig1270	122	34	25	21	42	37.7049	-52.5	-43.0328	-1.1413	GGAAGCAACAATTGAGGGGAATGAAGCCTGGTCCGAGGGCACTGACACTTATACAATCAATTTATGATCATCTGACAGATTTCGAAGAAAACGATGAGGTGACTCGGCCTTGGACCAGGCGACATTCCCCTCGAGAGAAAGCTTCC	Contig984	146	45	33	38	30	48.6301	-68.3	-46.7808	-0.961972	GTTGAGGGGAATGAAGCCTGGTCCGAAATCATTCAGATGAGCTTATACTTTGCATGAATGATCTCGAACCAGACGACATTCCCCTCAAC	Contig50
	bpe-miR165a-3p.C20G	20	TCGGACCAGGCTTCATCCCG	TTTGAGGGGAATGTCGGCTGGCTCGAGGCTTTTTGGCTTTTGGCATGGGTGGTTTTCTCATGAAAAAAAGAACTCTTAAGGCTTCGGACCAGGCTTCATTCCCCTCAAA	Contig2096	109	23	22	30	34	47.7064	-53.1	-48.7156	-1.02115	GGGGAGGATGAAAAGTGAAGGTCTGGTGTGGGGAATGTTGTCTGGCTCGAGGCCACCAATAGACTGAATGATGACGTTCAGTTTGAGAGAGTTTTCTCGGACCAGGCTTCATTCCCCTCACTATCTTCTCTTTCTCTATCATTTTCTCT	Contig1055	149	31	31	39	48	46.9799	-69.8	-46.8456	-0.997143	GGTTGAGGGGAATGCTGTCTGGTTCGAGACCATTTCTCAGAAGCAAAAACAGAGCATCTTTCAAATGATCTCGGACCAGGCTTCATTCCCCCCCAACT	Contig1270	122	34	25	21	42	37.7049	-52.5	-43.0328	-1.1413	GGAAGCAACAATTGAGGGGAATGAAGCCTGGTCCGAGGGCACTGACACTTATACAATCAATTTATGATCATCTGACAGATTTCGAAGAAAACGATGAGGTGACTCGGCCTTGGACCAGGCGACATTCCCCTCGAGAGAAAGCTTCC	Contig984	146	45	33	38	30	48.6301	-68.3	-46.7808	-0.961972	GTTGAGGGGAATGAAGCCTGGTCCGAAATCATTCAGATGAGCTTATACTTTGCATGAATGATCTCGAACCAGACGACATTCCCCTCAAC	Contig50
	bpe-miR165a-3p.C7T.c	19	TCGGACTAGGCTTCATCCC	TTTGAGGGGAATGTCGGCTGGCTCGAGGCTTTTTGGCTTTTGGCATGGGTGGTTTTCTCATGAAAAAAAGAACTCTTAAGGCTTCGGACCAGGCTTCATTCCCCTCAAA	Contig2096	109	23	22	30	34	47.7064	-53.1	-48.7156	-1.02115	GGGGAGGATGAAAAGTGAAGGTCTGGTGTGGGGAATGTTGTCTGGCTCGAGGCCACCAATAGACTGAATGATGACGTTCAGTTTGAGAGAGTTTTCTCGGACCAGGCTTCATTCCCCTCACTATCTTCTCTTTCTCTATCATTTTCTCT	Contig1055	149	31	31	39	48	46.9799	-69.8	-46.8456	-0.997143	GGTTGAGGGGAATGCTGTCTGGTTCGAGACCATTTCTCAGAAGCAAAAACAGAGCATCTTTCAAATGATCTCGGACCAGGCTTCATTCCCCCCCAACT	Contig1270	122	34	25	21	42	37.7049	-52.5	-43.0328	-1.1413	GGAAGCAACAATTGAGGGGAATGAAGCCTGGTCCGAGGGCACTGACACTTATACAATCAATTTATGATCATCTGACAGATTTCGAAGAAAACGATGAGGTGACTCGGCCTTGGACCAGGCGACATTCCCCTCGAGAGAAAGCTTCC	Contig984	146	45	33	38	30	48.6301	-68.3	-46.7808	-0.961972	GTTGAGGGGAATGAAGCCTGGTCCGAAATCATTCAGATGAGCTTATACTTTGCATGAATGATCTCGAACCAGACGACATTCCCCTCAAC	Contig50
	bpe-miR165a-3p.C19T.C.A	22	TCGGACCAGGCTTCATCCTCCA	TTTGAGGGGAATGTCGGCTGGCTCGAGGCTTTTTGGCTTTTGGCATGGGTGGTTTTCTCATGAAAAAAAGAACTCTTAAGGCTTCGGACCAGGCTTCATTCCCCTCAAA	Contig2096	109	23	22	30	34	47.7064	-53.1	-48.7156	-1.02115	GGGGAGGATGAAAAGTGAAGGTCTGGTGTGGGGAATGTTGTCTGGCTCGAGGCCACCAATAGACTGAATGATGACGTTCAGTTTGAGAGAGTTTTCTCGGACCAGGCTTCATTCCCCTCACTATCTTCTCTTTCTCTATCATTTTCTCT	Contig1055	149	31	31	39	48	46.9799	-69.8	-46.8456	-0.997143	GGTTGAGGGGAATGCTGTCTGGTTCGAGACCATTTCTCAGAAGCAAAAACAGAGCATCTTTCAAATGATCTCGGACCAGGCTTCATTCCCCCCCAACT	Contig1270	122	34	25	21	42	37.7049	-52.5	-43.0328	-1.1413	GGAAGCAACAATTGAGGGGAATGAAGCCTGGTCCGAGGGCACTGACACTTATACAATCAATTTATGATCATCTGACAGATTTCGAAGAAAACGATGAGGTGACTCGGCCTTGGACCAGGCGACATTCCCCTCGAGAGAAAGCTTCC	Contig984	146	45	33	38	30	48.6301	-68.3	-46.7808	-0.961972	GTTGAGGGGAATGAAGCCTGGTCCGAAATCATTCAGATGAGCTTATACTTTGCATGAATGATCTCGAACCAGACGACATTCCCCTCAAC	Contig50
	bpe-miR165a-3p.C7T.cc	18	TCGGACTAGGCTTCATCC	TTTGAGGGGAATGTCGGCTGGCTCGAGGCTTTTTGGCTTTTGGCATGGGTGGTTTTCTCATGAAAAAAAGAACTCTTAAGGCTTCGGACCAGGCTTCATTCCCCTCAAA	Contig2096	109	23	22	30	34	47.7064	-53.1	-48.7156	-1.02115	GGGGAGGATGAAAAGTGAAGGTCTGGTGTGGGGAATGTTGTCTGGCTCGAGGCCACCAATAGACTGAATGATGACGTTCAGTTTGAGAGAGTTTTCTCGGACCAGGCTTCATTCCCCTCACTATCTTCTCTTTCTCTATCATTTTCTCT	Contig1055	149	31	31	39	48	46.9799	-69.8	-46.8456	-0.997143	GGTTGAGGGGAATGCTGTCTGGTTCGAGACCATTTCTCAGAAGCAAAAACAGAGCATCTTTCAAATGATCTCGGACCAGGCTTCATTCCCCCCCAACT	Contig1270	122	34	25	21	42	37.7049	-52.5	-43.0328	-1.1413	GGAAGCAACAATTGAGGGGAATGAAGCCTGGTCCGAGGGCACTGACACTTATACAATCAATTTATGATCATCTGACAGATTTCGAAGAAAACGATGAGGTGACTCGGCCTTGGACCAGGCGACATTCCCCTCGAGAGAAAGCTTCC	Contig984	146	45	33	38	30	48.6301	-68.3	-46.7808	-0.961972	GTTGAGGGGAATGAAGCCTGGTCCGAAATCATTCAGATGAGCTTATACTTTGCATGAATGATCTCGAACCAGACGACATTCCCCTCAAC	Contig50
	bpe-miR165a-3p	21	TCGGACCAGGCTTCATCCCCC	TTTGAGGGGAATGTCGGCTGGCTCGAGGCTTTTTGGCTTTTGGCATGGGTGGTTTTCTCATGAAAAAAAGAACTCTTAAGGCTTCGGACCAGGCTTCATTCCCCTCAAA	Contig2096	109	23	22	30	34	47.7064	-53.1	-48.7156	-1.02115	GGGGAGGATGAAAAGTGAAGGTCTGGTGTGGGGAATGTTGTCTGGCTCGAGGCCACCAATAGACTGAATGATGACGTTCAGTTTGAGAGAGTTTTCTCGGACCAGGCTTCATTCCCCTCACTATCTTCTCTTTCTCTATCATTTTCTCT	Contig1055	149	31	31	39	48	46.9799	-69.8	-46.8456	-0.997143	GGTTGAGGGGAATGCTGTCTGGTTCGAGACCATTTCTCAGAAGCAAAAACAGAGCATCTTTCAAATGATCTCGGACCAGGCTTCATTCCCCCCCAACT	Contig1270	122	34	25	21	42	37.7049	-52.5	-43.0328	-1.1413	GGAAGCAACAATTGAGGGGAATGAAGCCTGGTCCGAGGGCACTGACACTTATACAATCAATTTATGATCATCTGACAGATTTCGAAGAAAACGATGAGGTGACTCGGCCTTGGACCAGGCGACATTCCCCTCGAGAGAAAGCTTCC	Contig984	146	45	33	38	30	48.6301	-68.3	-46.7808	-0.961972	GTTGAGGGGAATGAAGCCTGGTCCGAAATCATTCAGATGAGCTTATACTTTGCATGAATGATCTCGAACCAGACGACATTCCCCTCAAC	Contig50
	bpe-miR165a-3p.C21G	21	TCGGACCAGGCTTCATCCCCG	TTTGAGGGGAATGTCGGCTGGCTCGAGGCTTTTTGGCTTTTGGCATGGGTGGTTTTCTCATGAAAAAAAGAACTCTTAAGGCTTCGGACCAGGCTTCATTCCCCTCAAA	Contig2096	109	23	22	30	34	47.7064	-53.1	-48.7156	-1.02115	GGGGAGGATGAAAAGTGAAGGTCTGGTGTGGGGAATGTTGTCTGGCTCGAGGCCACCAATAGACTGAATGATGACGTTCAGTTTGAGAGAGTTTTCTCGGACCAGGCTTCATTCCCCTCACTATCTTCTCTTTCTCTATCATTTTCTCT	Contig1055	149	31	31	39	48	46.9799	-69.8	-46.8456	-0.997143	GGTTGAGGGGAATGCTGTCTGGTTCGAGACCATTTCTCAGAAGCAAAAACAGAGCATCTTTCAAATGATCTCGGACCAGGCTTCATTCCCCCCCAACT	Contig1270	122	34	25	21	42	37.7049	-52.5	-43.0328	-1.1413	GGAAGCAACAATTGAGGGGAATGAAGCCTGGTCCGAGGGCACTGACACTTATACAATCAATTTATGATCATCTGACAGATTTCGAAGAAAACGATGAGGTGACTCGGCCTTGGACCAGGCGACATTCCCCTCGAGAGAAAGCTTCC	Contig984	146	45	33	38	30	48.6301	-68.3	-46.7808	-0.961972	GTTGAGGGGAATGAAGCCTGGTCCGAAATCATTCAGATGAGCTTATACTTTGCATGAATGATCTCGAACCAGACGACATTCCCCTCAAC	Contig50
	bpe-miR165a-3p.A15T	21	TCGGACCAGGCTTCTTCCCCC	TTTGAGGGGAATGTCGGCTGGCTCGAGGCTTTTTGGCTTTTGGCATGGGTGGTTTTCTCATGAAAAAAAGAACTCTTAAGGCTTCGGACCAGGCTTCATTCCCCTCAAA	Contig2096	109	23	22	30	34	47.7064	-53.1	-48.7156	-1.02115	GGGGAGGATGAAAAGTGAAGGTCTGGTGTGGGGAATGTTGTCTGGCTCGAGGCCACCAATAGACTGAATGATGACGTTCAGTTTGAGAGAGTTTTCTCGGACCAGGCTTCATTCCCCTCACTATCTTCTCTTTCTCTATCATTTTCTCT	Contig1055	149	31	31	39	48	46.9799	-69.8	-46.8456	-0.997143	GGTTGAGGGGAATGCTGTCTGGTTCGAGACCATTTCTCAGAAGCAAAAACAGAGCATCTTTCAAATGATCTCGGACCAGGCTTCATTCCCCCCCAACT	Contig1270	122	34	25	21	42	37.7049	-52.5	-43.0328	-1.1413	GGAAGCAACAATTGAGGGGAATGAAGCCTGGTCCGAGGGCACTGACACTTATACAATCAATTTATGATCATCTGACAGATTTCGAAGAAAACGATGAGGTGACTCGGCCTTGGACCAGGCGACATTCCCCTCGAGAGAAAGCTTCC	Contig984	146	45	33	38	30	48.6301	-68.3	-46.7808	-0.961972	GTTGAGGGGAATGAAGCCTGGTCCGAAATCATTCAGATGAGCTTATACTTTGCATGAATGATCTCGAACCAGACGACATTCCCCTCAAC	Contig50
	bpe-miR165a-3p.C21A	21	TCGGACCAGGCTTCATCCCCA	TTTGAGGGGAATGTCGGCTGGCTCGAGGCTTTTTGGCTTTTGGCATGGGTGGTTTTCTCATGAAAAAAAGAACTCTTAAGGCTTCGGACCAGGCTTCATTCCCCTCAAA	Contig2096	109	23	22	30	34	47.7064	-53.1	-48.7156	-1.02115	GGGGAGGATGAAAAGTGAAGGTCTGGTGTGGGGAATGTTGTCTGGCTCGAGGCCACCAATAGACTGAATGATGACGTTCAGTTTGAGAGAGTTTTCTCGGACCAGGCTTCATTCCCCTCACTATCTTCTCTTTCTCTATCATTTTCTCT	Contig1055	149	31	31	39	48	46.9799	-69.8	-46.8456	-0.997143	GGTTGAGGGGAATGCTGTCTGGTTCGAGACCATTTCTCAGAAGCAAAAACAGAGCATCTTTCAAATGATCTCGGACCAGGCTTCATTCCCCCCCAACT	Contig1270	122	34	25	21	42	37.7049	-52.5	-43.0328	-1.1413	GGAAGCAACAATTGAGGGGAATGAAGCCTGGTCCGAGGGCACTGACACTTATACAATCAATTTATGATCATCTGACAGATTTCGAAGAAAACGATGAGGTGACTCGGCCTTGGACCAGGCGACATTCCCCTCGAGAGAAAGCTTCC	Contig984	146	45	33	38	30	48.6301	-68.3	-46.7808	-0.961972	GTTGAGGGGAATGAAGCCTGGTCCGAAATCATTCAGATGAGCTTATACTTTGCATGAATGATCTCGAACCAGACGACATTCCCCTCAAC	Contig50
	bpe-miR165a-3p.tcs	19	GGACCAGGCTTCATCCCCC	TTTGAGGGGAATGTCGGCTGGCTCGAGGCTTTTTGGCTTTTGGCATGGGTGGTTTTCTCATGAAAAAAAGAACTCTTAAGGCTTCGGACCAGGCTTCATTCCCCTCAAA	Contig2096	109	23	22	30	34	47.7064	-53.1	-48.7156	-1.02115	GGGGAGGATGAAAAGTGAAGGTCTGGTGTGGGGAATGTTGTCTGGCTCGAGGCCACCAATAGACTGAATGATGACGTTCAGTTTGAGAGAGTTTTCTCGGACCAGGCTTCATTCCCCTCACTATCTTCTCTTTCTCTATCATTTTCTCT	Contig1055	149	31	31	39	48	46.9799	-69.8	-46.8456	-0.997143	GGTTGAGGGGAATGCTGTCTGGTTCGAGACCATTTCTCAGAAGCAAAAACAGAGCATCTTTCAAATGATCTCGGACCAGGCTTCATTCCCCCCCAACT	Contig1270	122	34	25	21	42	37.7049	-52.5	-43.0328	-1.1413	GGAAGCAACAATTGAGGGGAATGAAGCCTGGTCCGAGGGCACTGACACTTATACAATCAATTTATGATCATCTGACAGATTTCGAAGAAAACGATGAGGTGACTCGGCCTTGGACCAGGCGACATTCCCCTCGAGAGAAAGCTTCC	Contig984	146	45	33	38	30	48.6301	-68.3	-46.7808	-0.961972	GTTGAGGGGAATGAAGCCTGGTCCGAAATCATTCAGATGAGCTTATACTTTGCATGAATGATCTCGAACCAGACGACATTCCCCTCAAC	Contig50
bpe-miR166a-3p	bpe-miR166a-3p	21	TCGGACCAGGCTTCATTCCCC	TTTGAGGGGAATGTCGGCTGGCTCGAGGCTTTTTGGCTTTTGGCATGGGTGGTTTTCTCATGAAAAAAAGAACTCTTAAGGCTTCGGACCAGGCTTCATTCCCCTCAAA	Contig2096	109	23	22	30	34	47.7064	-53.1	-48.7156	-1.02115	GGGGAGGATGAAAAGTGAAGGTCTGGTGTGGGGAATGTTGTCTGGCTCGAGGCCACCAATAGACTGAATGATGACGTTCAGTTTGAGAGAGTTTTCTCGGACCAGGCTTCATTCCCCTCACTATCTTCTCTTTCTCTATCATTTTCTCT	Contig1055	149	31	31	39	48	46.9799	-69.8	-46.8456	-0.997143	GGTTGAGGGGAATGCTGTCTGGTTCGAGACCATTTCTCAGAAGCAAAAACAGAGCATCTTTCAAATGATCTCGGACCAGGCTTCATTCCCCCCCAACT	Contig1270	122	34	25	21	42	37.7049	-52.5	-43.0328	-1.1413	GGTTGAGGGGAATGCTGTCTGGTTCGAGACCATTTCTCAGAAGCAAAAACAGAGCATCTTTCAAATGATCTCGGACCAGGCTTCATTCCCCCCCAACT	Contig984	146	45	33	38	30	48.6301	-68.3	-46.7808	-0.961972	GTTGAGGGGAATGAAGCCTGGTCCGAAATCATTCAGATGAGCTTATACTTTGCATGAATGATCTCGAACCAGACGACATTCCCCTCAAC	Contig50
	bpe-miR166a-3p.C	22	TCGGACCAGGCTTCATTCCCCC	TTTGAGGGGAATGTCGGCTGGCTCGAGGCTTTTTGGCTTTTGGCATGGGTGGTTTTCTCATGAAAAAAAGAACTCTTAAGGCTTCGGACCAGGCTTCATTCCCCTCAAA	Contig2096	109	23	22	30	34	47.7064	-53.1	-48.7156	-1.02115	GGGGAGGATGAAAAGTGAAGGTCTGGTGTGGGGAATGTTGTCTGGCTCGAGGCCACCAATAGACTGAATGATGACGTTCAGTTTGAGAGAGTTTTCTCGGACCAGGCTTCATTCCCCTCACTATCTTCTCTTTCTCTATCATTTTCTCT	Contig1055	149	31	31	39	48	46.9799	-69.8	-46.8456	-0.997143	GGTTGAGGGGAATGCTGTCTGGTTCGAGACCATTTCTCAGAAGCAAAAACAGAGCATCTTTCAAATGATCTCGGACCAGGCTTCATTCCCCCCCAACT	Contig1270	122	34	25	21	42	37.7049	-52.5	-43.0328	-1.1413
	bpe-miR166a-3p.tcs	19	GGACCAGGCTTCATTCCCC	TTTGAGGGGAATGTCGGCTGGCTCGAGGCTTTTTGGCTTTTGGCATGGGTGGTTTTCTCATGAAAAAAAGAACTCTTAAGGCTTCGGACCAGGCTTCATTCCCCTCAAA	Contig2096	109	23	22	30	34	47.7064	-53.1	-48.7156	-1.02115	GGGGAGGATGAAAAGTGAAGGTCTGGTGTGGGGAATGTTGTCTGGCTCGAGGCCACCAATAGACTGAATGATGACGTTCAGTTTGAGAGAGTTTTCTCGGACCAGGCTTCATTCCCCTCACTATCTTCTCTTTCTCTATCATTTTCTCT	Contig1055	149	31	31	39	48	46.9799	-69.8	-46.8456	-0.997143	GGTTGAGGGGAATGCTGTCTGGTTCGAGACCATTTCTCAGAAGCAAAAACAGAGCATCTTTCAAATGATCTCGGACCAGGCTTCATTCCCCCCCAACT	Contig1270	122	34	25	21	42	37.7049	-52.5	-43.0328	-1.1413
	bpe-miR166a-3p.Ts	22	TTCGGACCAGGCTTCATTCCCC	TTTGAGGGGAATGTCGGCTGGCTCGAGGCTTTTTGGCTTTTGGCATGGGTGGTTTTCTCATGAAAAAAAGAACTCTTAAGGCTTCGGACCAGGCTTCATTCCCCTCAAA	Contig2096	109	23	22	30	34	47.7064	-53.1	-48.7156	-1.02115	GGGGAGGATGAAAAGTGAAGGTCTGGTGTGGGGAATGTTGTCTGGCTCGAGGCCACCAATAGACTGAATGATGACGTTCAGTTTGAGAGAGTTTTCTCGGACCAGGCTTCATTCCCCTCACTATCTTCTCTTTCTCTATCATTTTCTCT	Contig1055	149	31	31	39	48	46.9799	-69.8	-46.8456	-0.997143	GGTTGAGGGGAATGCTGTCTGGTTCGAGACCATTTCTCAGAAGCAAAAACAGAGCATCTTTCAAATGATCTCGGACCAGGCTTCATTCCCCCCCAACT	Contig1270	122	34	25	21	42	37.7049	-52.5	-43.0328	-1.1413
	bpe-miR166a-3p.T	22	TCGGACCAGGCTTCATTCCCCT	TTTGAGGGGAATGTCGGCTGGCTCGAGGCTTTTTGGCTTTTGGCATGGGTGGTTTTCTCATGAAAAAAAGAACTCTTAAGGCTTCGGACCAGGCTTCATTCCCCTCAAA	Contig2096	109	23	22	30	34	47.7064	-53.1	-48.7156	-1.02115	GGGGAGGATGAAAAGTGAAGGTCTGGTGTGGGGAATGTTGTCTGGCTCGAGGCCACCAATAGACTGAATGATGACGTTCAGTTTGAGAGAGTTTTCTCGGACCAGGCTTCATTCCCCTCACTATCTTCTCTTTCTCTATCATTTTCTCT	Contig1055	149	31	31	39	48	46.9799	-69.8	-46.8456	-0.997143	GGTTGAGGGGAATGCTGTCTGGTTCGAGACCATTTCTCAGAAGCAAAAACAGAGCATCTTTCAAATGATCTCGGACCAGGCTTCATTCCCCCCCAACT	Contig1270	122	34	25	21	42	37.7049	-52.5	-43.0328	-1.1413
	bpe-miR166a-3p.Gs	22	GTCGGACCAGGCTTCATTCCCC	TTTGAGGGGAATGTCGGCTGGCTCGAGGCTTTTTGGCTTTTGGCATGGGTGGTTTTCTCATGAAAAAAAGAACTCTTAAGGCTTCGGACCAGGCTTCATTCCCCTCAAA	Contig2096	109	23	22	30	34	47.7064	-53.1	-48.7156	-1.02115	GGGGAGGATGAAAAGTGAAGGTCTGGTGTGGGGAATGTTGTCTGGCTCGAGGCCACCAATAGACTGAATGATGACGTTCAGTTTGAGAGAGTTTTCTCGGACCAGGCTTCATTCCCCTCACTATCTTCTCTTTCTCTATCATTTTCTCT	Contig1055	149	31	31	39	48	46.9799	-69.8	-46.8456	-0.997143	GGTTGAGGGGAATGCTGTCTGGTTCGAGACCATTTCTCAGAAGCAAAAACAGAGCATCTTTCAAATGATCTCGGACCAGGCTTCATTCCCCCCCAACT	Contig1270	122	34	25	21	42	37.7049	-52.5	-43.0328	-1.1413
	bpe-miR166a-3p.G	22	TCGGACCAGGCTTCATTCCCCG	TTTGAGGGGAATGTCGGCTGGCTCGAGGCTTTTTGGCTTTTGGCATGGGTGGTTTTCTCATGAAAAAAAGAACTCTTAAGGCTTCGGACCAGGCTTCATTCCCCTCAAA	Contig2096	109	23	22	30	34	47.7064	-53.1	-48.7156	-1.02115	GGGGAGGATGAAAAGTGAAGGTCTGGTGTGGGGAATGTTGTCTGGCTCGAGGCCACCAATAGACTGAATGATGACGTTCAGTTTGAGAGAGTTTTCTCGGACCAGGCTTCATTCCCCTCACTATCTTCTCTTTCTCTATCATTTTCTCT	Contig1055	149	31	31	39	48	46.9799	-69.8	-46.8456	-0.997143	GGTTGAGGGGAATGCTGTCTGGTTCGAGACCATTTCTCAGAAGCAAAAACAGAGCATCTTTCAAATGATCTCGGACCAGGCTTCATTCCCCCCCAACT	Contig1270	122	34	25	21	42	37.7049	-52.5	-43.0328	-1.1413
	bpe-miR166a-3p.Ts.T1G	22	TGCGGACCAGGCTTCATTCCCC	TTTGAGGGGAATGTCGGCTGGCTCGAGGCTTTTTGGCTTTTGGCATGGGTGGTTTTCTCATGAAAAAAAGAACTCTTAAGGCTTCGGACCAGGCTTCATTCCCCTCAAA	Contig2096	109	23	22	30	34	47.7064	-53.1	-48.7156	-1.02115	GGGGAGGATGAAAAGTGAAGGTCTGGTGTGGGGAATGTTGTCTGGCTCGAGGCCACCAATAGACTGAATGATGACGTTCAGTTTGAGAGAGTTTTCTCGGACCAGGCTTCATTCCCCTCACTATCTTCTCTTTCTCTATCATTTTCTCT	Contig1055	149	31	31	39	48	46.9799	-69.8	-46.8456	-0.997143	GGTTGAGGGGAATGCTGTCTGGTTCGAGACCATTTCTCAGAAGCAAAAACAGAGCATCTTTCAAATGATCTCGGACCAGGCTTCATTCCCCCCCAACT	Contig1270	122	34	25	21	42	37.7049	-52.5	-43.0328	-1.1413
	bpe-miR166a-3p.A	22	TCGGACCAGGCTTCATTCCCCA	TTTGAGGGGAATGTCGGCTGGCTCGAGGCTTTTTGGCTTTTGGCATGGGTGGTTTTCTCATGAAAAAAAGAACTCTTAAGGCTTCGGACCAGGCTTCATTCCCCTCAAA	Contig2096	109	23	22	30	34	47.7064	-53.1	-48.7156	-1.02115	GGGGAGGATGAAAAGTGAAGGTCTGGTGTGGGGAATGTTGTCTGGCTCGAGGCCACCAATAGACTGAATGATGACGTTCAGTTTGAGAGAGTTTTCTCGGACCAGGCTTCATTCCCCTCACTATCTTCTCTTTCTCTATCATTTTCTCT	Contig1055	149	31	31	39	48	46.9799	-69.8	-46.8456	-0.997143	GGTTGAGGGGAATGCTGTCTGGTTCGAGACCATTTCTCAGAAGCAAAAACAGAGCATCTTTCAAATGATCTCGGACCAGGCTTCATTCCCCCCCAACT	Contig1270	122	34	25	21	42	37.7049	-52.5	-43.0328	-1.1413
	bpe-miR166a-3p.TTs.cc	21	TTTCGGACCAGGCTTCATTCC	TTTGAGGGGAATGTCGGCTGGCTCGAGGCTTTTTGGCTTTTGGCATGGGTGGTTTTCTCATGAAAAAAAGAACTCTTAAGGCTTCGGACCAGGCTTCATTCCCCTCAAA	Contig2096	109	23	22	30	34	47.7064	-53.1	-48.7156	-1.02115	GGGGAGGATGAAAAGTGAAGGTCTGGTGTGGGGAATGTTGTCTGGCTCGAGGCCACCAATAGACTGAATGATGACGTTCAGTTTGAGAGAGTTTTCTCGGACCAGGCTTCATTCCCCTCACTATCTTCTCTTTCTCTATCATTTTCTCT	Contig1055	149	31	31	39	48	46.9799	-69.8	-46.8456	-0.997143	GGTTGAGGGGAATGCTGTCTGGTTCGAGACCATTTCTCAGAAGCAAAAACAGAGCATCTTTCAAATGATCTCGGACCAGGCTTCATTCCCCCCCAACT	Contig1270	122	34	25	21	42	37.7049	-52.5	-43.0328	-1.1413
	bpe-miR166a-3p.Gs.c	21	GTCGGACCAGGCTTCATTCCC	TTTGAGGGGAATGTCGGCTGGCTCGAGGCTTTTTGGCTTTTGGCATGGGTGGTTTTCTCATGAAAAAAAGAACTCTTAAGGCTTCGGACCAGGCTTCATTCCCCTCAAA	Contig2096	109	23	22	30	34	47.7064	-53.1	-48.7156	-1.02115	GGGGAGGATGAAAAGTGAAGGTCTGGTGTGGGGAATGTTGTCTGGCTCGAGGCCACCAATAGACTGAATGATGACGTTCAGTTTGAGAGAGTTTTCTCGGACCAGGCTTCATTCCCCTCACTATCTTCTCTTTCTCTATCATTTTCTCT	Contig1055	149	31	31	39	48	46.9799	-69.8	-46.8456	-0.997143	GGTTGAGGGGAATGCTGTCTGGTTCGAGACCATTTCTCAGAAGCAAAAACAGAGCATCTTTCAAATGATCTCGGACCAGGCTTCATTCCCCCCCAACT	Contig1270	122	34	25	21	42	37.7049	-52.5	-43.0328	-1.1413
	bpe-miR166a-3p.GT	23	TCGGACCAGGCTTCATTCCCCGT	TTTGAGGGGAATGTCGGCTGGCTCGAGGCTTTTTGGCTTTTGGCATGGGTGGTTTTCTCATGAAAAAAAGAACTCTTAAGGCTTCGGACCAGGCTTCATTCCCCTCAAA	Contig2096	109	23	22	30	34	47.7064	-53.1	-48.7156	-1.02115	GGGGAGGATGAAAAGTGAAGGTCTGGTGTGGGGAATGTTGTCTGGCTCGAGGCCACCAATAGACTGAATGATGACGTTCAGTTTGAGAGAGTTTTCTCGGACCAGGCTTCATTCCCCTCACTATCTTCTCTTTCTCTATCATTTTCTCT	Contig1055	149	31	31	39	48	46.9799	-69.8	-46.8456	-0.997143	GGTTGAGGGGAATGCTGTCTGGTTCGAGACCATTTCTCAGAAGCAAAAACAGAGCATCTTTCAAATGATCTCGGACCAGGCTTCATTCCCCCCCAACT	Contig1270	122	34	25	21	42	37.7049	-52.5	-43.0328	-1.1413
	bpe-miR166a-3p.TCs	23	TCTCGGACCAGGCTTCATTCCCC	TTTGAGGGGAATGTCGGCTGGCTCGAGGCTTTTTGGCTTTTGGCATGGGTGGTTTTCTCATGAAAAAAAGAACTCTTAAGGCTTCGGACCAGGCTTCATTCCCCTCAAA	Contig2096	109	23	22	30	34	47.7064	-53.1	-48.7156	-1.02115	GGGGAGGATGAAAAGTGAAGGTCTGGTGTGGGGAATGTTGTCTGGCTCGAGGCCACCAATAGACTGAATGATGACGTTCAGTTTGAGAGAGTTTTCTCGGACCAGGCTTCATTCCCCTCACTATCTTCTCTTTCTCTATCATTTTCTCT	Contig1055	149	31	31	39	48	46.9799	-69.8	-46.8456	-0.997143	GGTTGAGGGGAATGCTGTCTGGTTCGAGACCATTTCTCAGAAGCAAAAACAGAGCATCTTTCAAATGATCTCGGACCAGGCTTCATTCCCCCCCAACT	Contig1270	122	34	25	21	42	37.7049	-52.5	-43.0328	-1.1413
	bpe-miR166a-3p.Cs	22	CTCGGACCAGGCTTCATTCCCC	TTTGAGGGGAATGTCGGCTGGCTCGAGGCTTTTTGGCTTTTGGCATGGGTGGTTTTCTCATGAAAAAAAGAACTCTTAAGGCTTCGGACCAGGCTTCATTCCCCTCAAA	Contig2096	109	23	22	30	34	47.7064	-53.1	-48.7156	-1.02115	GGGGAGGATGAAAAGTGAAGGTCTGGTGTGGGGAATGTTGTCTGGCTCGAGGCCACCAATAGACTGAATGATGACGTTCAGTTTGAGAGAGTTTTCTCGGACCAGGCTTCATTCCCCTCACTATCTTCTCTTTCTCTATCATTTTCTCT	Contig1055	149	31	31	39	48	46.9799	-69.8	-46.8456	-0.997143	GGTTGAGGGGAATGCTGTCTGGTTCGAGACCATTTCTCAGAAGCAAAAACAGAGCATCTTTCAAATGATCTCGGACCAGGCTTCATTCCCCCCCAACT	Contig1270	122	34	25	21	42	37.7049	-52.5	-43.0328	-1.1413
	bpe-miR166a-3p.Ts.T1C.C2G	22	TCGGGACCAGGCTTCATTCCCC	TTTGAGGGGAATGTCGGCTGGCTCGAGGCTTTTTGGCTTTTGGCATGGGTGGTTTTCTCATGAAAAAAAGAACTCTTAAGGCTTCGGACCAGGCTTCATTCCCCTCAAA	Contig2096	109	23	22	30	34	47.7064	-53.1	-48.7156	-1.02115	GGGGAGGATGAAAAGTGAAGGTCTGGTGTGGGGAATGTTGTCTGGCTCGAGGCCACCAATAGACTGAATGATGACGTTCAGTTTGAGAGAGTTTTCTCGGACCAGGCTTCATTCCCCTCACTATCTTCTCTTTCTCTATCATTTTCTCT	Contig1055	149	31	31	39	48	46.9799	-69.8	-46.8456	-0.997143	GGTTGAGGGGAATGCTGTCTGGTTCGAGACCATTTCTCAGAAGCAAAAACAGAGCATCTTTCAAATGATCTCGGACCAGGCTTCATTCCCCCCCAACT	Contig1270	122	34	25	21	42	37.7049	-52.5	-43.0328	-1.1413
	bpe-miR166a-3p.Ts.C	23	TTCGGACCAGGCTTCATTCCCCC	TTTGAGGGGAATGTCGGCTGGCTCGAGGCTTTTTGGCTTTTGGCATGGGTGGTTTTCTCATGAAAAAAAGAACTCTTAAGGCTTCGGACCAGGCTTCATTCCCCTCAAA	Contig2096	109	23	22	30	34	47.7064	-53.1	-48.7156	-1.02115	GGGGAGGATGAAAAGTGAAGGTCTGGTGTGGGGAATGTTGTCTGGCTCGAGGCCACCAATAGACTGAATGATGACGTTCAGTTTGAGAGAGTTTTCTCGGACCAGGCTTCATTCCCCTCACTATCTTCTCTTTCTCTATCATTTTCTCT	Contig1055	149	31	31	39	48	46.9799	-69.8	-46.8456	-0.997143	GGTTGAGGGGAATGCTGTCTGGTTCGAGACCATTTCTCAGAAGCAAAAACAGAGCATCTTTCAAATGATCTCGGACCAGGCTTCATTCCCCCCCAACT	Contig1270	122	34	25	21	42	37.7049	-52.5	-43.0328	-1.1413
	bpe-miR166a-3p.Ts.cc	20	TTCGGACCAGGCTTCATTCC	TTTGAGGGGAATGTCGGCTGGCTCGAGGCTTTTTGGCTTTTGGCATGGGTGGTTTTCTCATGAAAAAAAGAACTCTTAAGGCTTCGGACCAGGCTTCATTCCCCTCAAA	Contig2096	109	23	22	30	34	47.7064	-53.1	-48.7156	-1.02115	GGGGAGGATGAAAAGTGAAGGTCTGGTGTGGGGAATGTTGTCTGGCTCGAGGCCACCAATAGACTGAATGATGACGTTCAGTTTGAGAGAGTTTTCTCGGACCAGGCTTCATTCCCCTCACTATCTTCTCTTTCTCTATCATTTTCTCT	Contig1055	149	31	31	39	48	46.9799	-69.8	-46.8456	-0.997143	GGTTGAGGGGAATGCTGTCTGGTTCGAGACCATTTCTCAGAAGCAAAAACAGAGCATCTTTCAAATGATCTCGGACCAGGCTTCATTCCCCCCCAACT	Contig1270	122	34	25	21	42	37.7049	-52.5	-43.0328	-1.1413
	bpe-miR166a-3p.As	22	ATCGGACCAGGCTTCATTCCCC	TTTGAGGGGAATGTCGGCTGGCTCGAGGCTTTTTGGCTTTTGGCATGGGTGGTTTTCTCATGAAAAAAAGAACTCTTAAGGCTTCGGACCAGGCTTCATTCCCCTCAAA	Contig2096	109	23	22	30	34	47.7064	-53.1	-48.7156	-1.02115	GGGGAGGATGAAAAGTGAAGGTCTGGTGTGGGGAATGTTGTCTGGCTCGAGGCCACCAATAGACTGAATGATGACGTTCAGTTTGAGAGAGTTTTCTCGGACCAGGCTTCATTCCCCTCACTATCTTCTCTTTCTCTATCATTTTCTCT	Contig1055	149	31	31	39	48	46.9799	-69.8	-46.8456	-0.997143	GGTTGAGGGGAATGCTGTCTGGTTCGAGACCATTTCTCAGAAGCAAAAACAGAGCATCTTTCAAATGATCTCGGACCAGGCTTCATTCCCCCCCAACT	Contig1270	122	34	25	21	42	37.7049	-52.5	-43.0328	-1.1413
	bpe-miR166a-3p.T16A.C18T.C	22	TCGGACCAGGCTTCAATTCCCC	TTTGAGGGGAATGTCGGCTGGCTCGAGGCTTTTTGGCTTTTGGCATGGGTGGTTTTCTCATGAAAAAAAGAACTCTTAAGGCTTCGGACCAGGCTTCATTCCCCTCAAA	Contig2096	109	23	22	30	34	47.7064	-53.1	-48.7156	-1.02115	GGGGAGGATGAAAAGTGAAGGTCTGGTGTGGGGAATGTTGTCTGGCTCGAGGCCACCAATAGACTGAATGATGACGTTCAGTTTGAGAGAGTTTTCTCGGACCAGGCTTCATTCCCCTCACTATCTTCTCTTTCTCTATCATTTTCTCT	Contig1055	149	31	31	39	48	46.9799	-69.8	-46.8456	-0.997143	GGTTGAGGGGAATGCTGTCTGGTTCGAGACCATTTCTCAGAAGCAAAAACAGAGCATCTTTCAAATGATCTCGGACCAGGCTTCATTCCCCCCCAACT	Contig1270	122	34	25	21	42	37.7049	-52.5	-43.0328	-1.1413
	bpe-miR166a-3p.tcs.C	20	GGACCAGGCTTCATTCCCCC	TTTGAGGGGAATGTCGGCTGGCTCGAGGCTTTTTGGCTTTTGGCATGGGTGGTTTTCTCATGAAAAAAAGAACTCTTAAGGCTTCGGACCAGGCTTCATTCCCCTCAAA	Contig2096	109	23	22	30	34	47.7064	-53.1	-48.7156	-1.02115	GGGGAGGATGAAAAGTGAAGGTCTGGTGTGGGGAATGTTGTCTGGCTCGAGGCCACCAATAGACTGAATGATGACGTTCAGTTTGAGAGAGTTTTCTCGGACCAGGCTTCATTCCCCTCACTATCTTCTCTTTCTCTATCATTTTCTCT	Contig1055	149	31	31	39	48	46.9799	-69.8	-46.8456	-0.997143	GGTTGAGGGGAATGCTGTCTGGTTCGAGACCATTTCTCAGAAGCAAAAACAGAGCATCTTTCAAATGATCTCGGACCAGGCTTCATTCCCCCCCAACT	Contig1270	122	34	25	21	42	37.7049	-52.5	-43.0328	-1.1413
	bpe-miR166a-3p.TT	23	TCGGACCAGGCTTCATTCCCCTT	TTTGAGGGGAATGTCGGCTGGCTCGAGGCTTTTTGGCTTTTGGCATGGGTGGTTTTCTCATGAAAAAAAGAACTCTTAAGGCTTCGGACCAGGCTTCATTCCCCTCAAA	Contig2096	109	23	22	30	34	47.7064	-53.1	-48.7156	-1.02115	GGGGAGGATGAAAAGTGAAGGTCTGGTGTGGGGAATGTTGTCTGGCTCGAGGCCACCAATAGACTGAATGATGACGTTCAGTTTGAGAGAGTTTTCTCGGACCAGGCTTCATTCCCCTCACTATCTTCTCTTTCTCTATCATTTTCTCT	Contig1055	149	31	31	39	48	46.9799	-69.8	-46.8456	-0.997143	GGTTGAGGGGAATGCTGTCTGGTTCGAGACCATTTCTCAGAAGCAAAAACAGAGCATCTTTCAAATGATCTCGGACCAGGCTTCATTCCCCCCCAACT	Contig1270	122	34	25	21	42	37.7049	-52.5	-43.0328	-1.1413
	bpe-miR166a-3p.Ts.T1A	22	TACGGACCAGGCTTCATTCCCC	TTTGAGGGGAATGTCGGCTGGCTCGAGGCTTTTTGGCTTTTGGCATGGGTGGTTTTCTCATGAAAAAAAGAACTCTTAAGGCTTCGGACCAGGCTTCATTCCCCTCAAA	Contig2096	109	23	22	30	34	47.7064	-53.1	-48.7156	-1.02115	GGGGAGGATGAAAAGTGAAGGTCTGGTGTGGGGAATGTTGTCTGGCTCGAGGCCACCAATAGACTGAATGATGACGTTCAGTTTGAGAGAGTTTTCTCGGACCAGGCTTCATTCCCCTCACTATCTTCTCTTTCTCTATCATTTTCTCT	Contig1055	149	31	31	39	48	46.9799	-69.8	-46.8456	-0.997143	GGTTGAGGGGAATGCTGTCTGGTTCGAGACCATTTCTCAGAAGCAAAAACAGAGCATCTTTCAAATGATCTCGGACCAGGCTTCATTCCCCCCCAACT	Contig1270	122	34	25	21	42	37.7049	-52.5	-43.0328	-1.1413
	bpe-miR166a-3p.Ts.T1C.C2G.C	23	TCGGGACCAGGCTTCATTCCCCC	TTTGAGGGGAATGTCGGCTGGCTCGAGGCTTTTTGGCTTTTGGCATGGGTGGTTTTCTCATGAAAAAAAGAACTCTTAAGGCTTCGGACCAGGCTTCATTCCCCTCAAA	Contig2096	109	23	22	30	34	47.7064	-53.1	-48.7156	-1.02115	GGGGAGGATGAAAAGTGAAGGTCTGGTGTGGGGAATGTTGTCTGGCTCGAGGCCACCAATAGACTGAATGATGACGTTCAGTTTGAGAGAGTTTTCTCGGACCAGGCTTCATTCCCCTCACTATCTTCTCTTTCTCTATCATTTTCTCT	Contig1055	149	31	31	39	48	46.9799	-69.8	-46.8456	-0.997143	GGTTGAGGGGAATGCTGTCTGGTTCGAGACCATTTCTCAGAAGCAAAAACAGAGCATCTTTCAAATGATCTCGGACCAGGCTTCATTCCCCCCCAACT	Contig1270	122	34	25	21	42	37.7049	-52.5	-43.0328	-1.1413
	bpe-miR166a-3p.CC	23	TCGGACCAGGCTTCATTCCCCCC	TTTGAGGGGAATGTCGGCTGGCTCGAGGCTTTTTGGCTTTTGGCATGGGTGGTTTTCTCATGAAAAAAAGAACTCTTAAGGCTTCGGACCAGGCTTCATTCCCCTCAAA	Contig2096	109	23	22	30	34	47.7064	-53.1	-48.7156	-1.02115	GGGGAGGATGAAAAGTGAAGGTCTGGTGTGGGGAATGTTGTCTGGCTCGAGGCCACCAATAGACTGAATGATGACGTTCAGTTTGAGAGAGTTTTCTCGGACCAGGCTTCATTCCCCTCACTATCTTCTCTTTCTCTATCATTTTCTCT	Contig1055	149	31	31	39	48	46.9799	-69.8	-46.8456	-0.997143	GGTTGAGGGGAATGCTGTCTGGTTCGAGACCATTTCTCAGAAGCAAAAACAGAGCATCTTTCAAATGATCTCGGACCAGGCTTCATTCCCCCCCAACT	Contig1270	122	34	25	21	42	37.7049	-52.5	-43.0328	-1.1413
	bpe-miR166a-3p.Ts.T1C.C2T	22	TCTGGACCAGGCTTCATTCCCC	TTTGAGGGGAATGTCGGCTGGCTCGAGGCTTTTTGGCTTTTGGCATGGGTGGTTTTCTCATGAAAAAAAGAACTCTTAAGGCTTCGGACCAGGCTTCATTCCCCTCAAA	Contig2096	109	23	22	30	34	47.7064	-53.1	-48.7156	-1.02115	GGGGAGGATGAAAAGTGAAGGTCTGGTGTGGGGAATGTTGTCTGGCTCGAGGCCACCAATAGACTGAATGATGACGTTCAGTTTGAGAGAGTTTTCTCGGACCAGGCTTCATTCCCCTCACTATCTTCTCTTTCTCTATCATTTTCTCT	Contig1055	149	31	31	39	48	46.9799	-69.8	-46.8456	-0.997143	GGTTGAGGGGAATGCTGTCTGGTTCGAGACCATTTCTCAGAAGCAAAAACAGAGCATCTTTCAAATGATCTCGGACCAGGCTTCATTCCCCCCCAACT	Contig1270	122	34	25	21	42	37.7049	-52.5	-43.0328	-1.1413
	bpe-miR166a-3p.AT	23	TCGGACCAGGCTTCATTCCCCAT	TTTGAGGGGAATGTCGGCTGGCTCGAGGCTTTTTGGCTTTTGGCATGGGTGGTTTTCTCATGAAAAAAAGAACTCTTAAGGCTTCGGACCAGGCTTCATTCCCCTCAAA	Contig2096	109	23	22	30	34	47.7064	-53.1	-48.7156	-1.02115	GGGGAGGATGAAAAGTGAAGGTCTGGTGTGGGGAATGTTGTCTGGCTCGAGGCCACCAATAGACTGAATGATGACGTTCAGTTTGAGAGAGTTTTCTCGGACCAGGCTTCATTCCCCTCACTATCTTCTCTTTCTCTATCATTTTCTCT	Contig1055	149	31	31	39	48	46.9799	-69.8	-46.8456	-0.997143	GGTTGAGGGGAATGCTGTCTGGTTCGAGACCATTTCTCAGAAGCAAAAACAGAGCATCTTTCAAATGATCTCGGACCAGGCTTCATTCCCCCCCAACT	Contig1270	122	34	25	21	42	37.7049	-52.5	-43.0328	-1.1413
	bpe-miR166a-3p.GC	23	TCGGACCAGGCTTCATTCCCCGC	TTTGAGGGGAATGTCGGCTGGCTCGAGGCTTTTTGGCTTTTGGCATGGGTGGTTTTCTCATGAAAAAAAGAACTCTTAAGGCTTCGGACCAGGCTTCATTCCCCTCAAA	Contig2096	109	23	22	30	34	47.7064	-53.1	-48.7156	-1.02115	GGGGAGGATGAAAAGTGAAGGTCTGGTGTGGGGAATGTTGTCTGGCTCGAGGCCACCAATAGACTGAATGATGACGTTCAGTTTGAGAGAGTTTTCTCGGACCAGGCTTCATTCCCCTCACTATCTTCTCTTTCTCTATCATTTTCTCT	Contig1055	149	31	31	39	48	46.9799	-69.8	-46.8456	-0.997143	GGTTGAGGGGAATGCTGTCTGGTTCGAGACCATTTCTCAGAAGCAAAAACAGAGCATCTTTCAAATGATCTCGGACCAGGCTTCATTCCCCCCCAACT	Contig1270	122	34	25	21	42	37.7049	-52.5	-43.0328	-1.1413
	bpe-miR166a-3p.G3T	21	TCTGACCAGGCTTCATTCCCC	TTTGAGGGGAATGTCGGCTGGCTCGAGGCTTTTTGGCTTTTGGCATGGGTGGTTTTCTCATGAAAAAAAGAACTCTTAAGGCTTCGGACCAGGCTTCATTCCCCTCAAA	Contig2096	109	23	22	30	34	47.7064	-53.1	-48.7156	-1.02115	GGGGAGGATGAAAAGTGAAGGTCTGGTGTGGGGAATGTTGTCTGGCTCGAGGCCACCAATAGACTGAATGATGACGTTCAGTTTGAGAGAGTTTTCTCGGACCAGGCTTCATTCCCCTCACTATCTTCTCTTTCTCTATCATTTTCTCT	Contig1055	149	31	31	39	48	46.9799	-69.8	-46.8456	-0.997143	GGTTGAGGGGAATGCTGTCTGGTTCGAGACCATTTCTCAGAAGCAAAAACAGAGCATCTTTCAAATGATCTCGGACCAGGCTTCATTCCCCCCCAACT	Contig1270	122	34	25	21	42	37.7049	-52.5	-43.0328	-1.1413
	bpe-miR166a-3p.A15T	21	TCGGACCAGGCTTCTTTCCCC	TTTGAGGGGAATGTCGGCTGGCTCGAGGCTTTTTGGCTTTTGGCATGGGTGGTTTTCTCATGAAAAAAAGAACTCTTAAGGCTTCGGACCAGGCTTCATTCCCCTCAAA	Contig2096	109	23	22	30	34	47.7064	-53.1	-48.7156	-1.02115	GGGGAGGATGAAAAGTGAAGGTCTGGTGTGGGGAATGTTGTCTGGCTCGAGGCCACCAATAGACTGAATGATGACGTTCAGTTTGAGAGAGTTTTCTCGGACCAGGCTTCATTCCCCTCACTATCTTCTCTTTCTCTATCATTTTCTCT	Contig1055	149	31	31	39	48	46.9799	-69.8	-46.8456	-0.997143	GGTTGAGGGGAATGCTGTCTGGTTCGAGACCATTTCTCAGAAGCAAAAACAGAGCATCTTTCAAATGATCTCGGACCAGGCTTCATTCCCCCCCAACT	Contig1270	122	34	25	21	42	37.7049	-52.5	-43.0328	-1.1413
	bpe-miR166a-3p.C7T	21	TCGGACTAGGCTTCATTCCCC	TTTGAGGGGAATGTCGGCTGGCTCGAGGCTTTTTGGCTTTTGGCATGGGTGGTTTTCTCATGAAAAAAAGAACTCTTAAGGCTTCGGACCAGGCTTCATTCCCCTCAAA	Contig2096	109	23	22	30	34	47.7064	-53.1	-48.7156	-1.02115	GGGGAGGATGAAAAGTGAAGGTCTGGTGTGGGGAATGTTGTCTGGCTCGAGGCCACCAATAGACTGAATGATGACGTTCAGTTTGAGAGAGTTTTCTCGGACCAGGCTTCATTCCCCTCACTATCTTCTCTTTCTCTATCATTTTCTCT	Contig1055	149	31	31	39	48	46.9799	-69.8	-46.8456	-0.997143	GGTTGAGGGGAATGCTGTCTGGTTCGAGACCATTTCTCAGAAGCAAAAACAGAGCATCTTTCAAATGATCTCGGACCAGGCTTCATTCCCCCCCAACT	Contig1270	122	34	25	21	42	37.7049	-52.5	-43.0328	-1.1413
	bpe-miR166a-3p.GA	23	TCGGACCAGGCTTCATTCCCCGA	TTTGAGGGGAATGTCGGCTGGCTCGAGGCTTTTTGGCTTTTGGCATGGGTGGTTTTCTCATGAAAAAAAGAACTCTTAAGGCTTCGGACCAGGCTTCATTCCCCTCAAA	Contig2096	109	23	22	30	34	47.7064	-53.1	-48.7156	-1.02115	GGGGAGGATGAAAAGTGAAGGTCTGGTGTGGGGAATGTTGTCTGGCTCGAGGCCACCAATAGACTGAATGATGACGTTCAGTTTGAGAGAGTTTTCTCGGACCAGGCTTCATTCCCCTCACTATCTTCTCTTTCTCTATCATTTTCTCT	Contig1055	149	31	31	39	48	46.9799	-69.8	-46.8456	-0.997143	GGTTGAGGGGAATGCTGTCTGGTTCGAGACCATTTCTCAGAAGCAAAAACAGAGCATCTTTCAAATGATCTCGGACCAGGCTTCATTCCCCCCCAACT	Contig1270	122	34	25	21	42	37.7049	-52.5	-43.0328	-1.1413
	bpe-miR166a-3p.Ts.T1G.cc	20	TGCGGACCAGGCTTCATTCC	TTTGAGGGGAATGTCGGCTGGCTCGAGGCTTTTTGGCTTTTGGCATGGGTGGTTTTCTCATGAAAAAAAGAACTCTTAAGGCTTCGGACCAGGCTTCATTCCCCTCAAA	Contig2096	109	23	22	30	34	47.7064	-53.1	-48.7156	-1.02115	GGGGAGGATGAAAAGTGAAGGTCTGGTGTGGGGAATGTTGTCTGGCTCGAGGCCACCAATAGACTGAATGATGACGTTCAGTTTGAGAGAGTTTTCTCGGACCAGGCTTCATTCCCCTCACTATCTTCTCTTTCTCTATCATTTTCTCT	Contig1055	149	31	31	39	48	46.9799	-69.8	-46.8456	-0.997143	GGTTGAGGGGAATGCTGTCTGGTTCGAGACCATTTCTCAGAAGCAAAAACAGAGCATCTTTCAAATGATCTCGGACCAGGCTTCATTCCCCCCCAACT	Contig1270	122	34	25	21	42	37.7049	-52.5	-43.0328	-1.1413
	bpe-miR166a-3p.C2T	21	TTGGACCAGGCTTCATTCCCC	TTTGAGGGGAATGTCGGCTGGCTCGAGGCTTTTTGGCTTTTGGCATGGGTGGTTTTCTCATGAAAAAAAGAACTCTTAAGGCTTCGGACCAGGCTTCATTCCCCTCAAA	Contig2096	109	23	22	30	34	47.7064	-53.1	-48.7156	-1.02115	GGGGAGGATGAAAAGTGAAGGTCTGGTGTGGGGAATGTTGTCTGGCTCGAGGCCACCAATAGACTGAATGATGACGTTCAGTTTGAGAGAGTTTTCTCGGACCAGGCTTCATTCCCCTCACTATCTTCTCTTTCTCTATCATTTTCTCT	Contig1055	149	31	31	39	48	46.9799	-69.8	-46.8456	-0.997143	GGTTGAGGGGAATGCTGTCTGGTTCGAGACCATTTCTCAGAAGCAAAAACAGAGCATCTTTCAAATGATCTCGGACCAGGCTTCATTCCCCCCCAACT	Contig1270	122	34	25	21	42	37.7049	-52.5	-43.0328	-1.1413
	bpe-miR166a-3p.TC	23	TCGGACCAGGCTTCATTCCCCTC	TTTGAGGGGAATGTCGGCTGGCTCGAGGCTTTTTGGCTTTTGGCATGGGTGGTTTTCTCATGAAAAAAAGAACTCTTAAGGCTTCGGACCAGGCTTCATTCCCCTCAAA	Contig2096	109	23	22	30	34	47.7064	-53.1	-48.7156	-1.02115	GGGGAGGATGAAAAGTGAAGGTCTGGTGTGGGGAATGTTGTCTGGCTCGAGGCCACCAATAGACTGAATGATGACGTTCAGTTTGAGAGAGTTTTCTCGGACCAGGCTTCATTCCCCTCACTATCTTCTCTTTCTCTATCATTTTCTCT	Contig1055	149	31	31	39	48	46.9799	-69.8	-46.8456	-0.997143	GGTTGAGGGGAATGCTGTCTGGTTCGAGACCATTTCTCAGAAGCAAAAACAGAGCATCTTTCAAATGATCTCGGACCAGGCTTCATTCCCCCCCAACT	Contig1270	122	34	25	21	42	37.7049	-52.5	-43.0328	-1.1413
	bpe-miR166a-3p.ts.TC	22	CGGACCAGGCTTCATTCCCCTC	TTTGAGGGGAATGTCGGCTGGCTCGAGGCTTTTTGGCTTTTGGCATGGGTGGTTTTCTCATGAAAAAAAGAACTCTTAAGGCTTCGGACCAGGCTTCATTCCCCTCAAA	Contig2096	109	23	22	30	34	47.7064	-53.1	-48.7156	-1.02115	GGGGAGGATGAAAAGTGAAGGTCTGGTGTGGGGAATGTTGTCTGGCTCGAGGCCACCAATAGACTGAATGATGACGTTCAGTTTGAGAGAGTTTTCTCGGACCAGGCTTCATTCCCCTCACTATCTTCTCTTTCTCTATCATTTTCTCT	Contig1055	149	31	31	39	48	46.9799	-69.8	-46.8456	-0.997143	GGTTGAGGGGAATGCTGTCTGGTTCGAGACCATTTCTCAGAAGCAAAAACAGAGCATCTTTCAAATGATCTCGGACCAGGCTTCATTCCCCCCCAACT	Contig1270	122	34	25	21	42	37.7049	-52.5	-43.0328	-1.1413
	bpe-miR166a-3p.C21A	21	TCGGACCAGGCTTCATTCCCA	TTTGAGGGGAATGTCGGCTGGCTCGAGGCTTTTTGGCTTTTGGCATGGGTGGTTTTCTCATGAAAAAAAGAACTCTTAAGGCTTCGGACCAGGCTTCATTCCCCTCAAA	Contig2096	109	23	22	30	34	47.7064	-53.1	-48.7156	-1.02115	GGGGAGGATGAAAAGTGAAGGTCTGGTGTGGGGAATGTTGTCTGGCTCGAGGCCACCAATAGACTGAATGATGACGTTCAGTTTGAGAGAGTTTTCTCGGACCAGGCTTCATTCCCCTCACTATCTTCTCTTTCTCTATCATTTTCTCT	Contig1055	149	31	31	39	48	46.9799	-69.8	-46.8456	-0.997143	GGTTGAGGGGAATGCTGTCTGGTTCGAGACCATTTCTCAGAAGCAAAAACAGAGCATCTTTCAAATGATCTCGGACCAGGCTTCATTCCCCCCCAACT	Contig1270	122	34	25	21	42	37.7049	-52.5	-43.0328	-1.1413
	bpe-miR166a-3p.C14T	21	TCGGACCAGGCTTTATTCCCC	TTTGAGGGGAATGTCGGCTGGCTCGAGGCTTTTTGGCTTTTGGCATGGGTGGTTTTCTCATGAAAAAAAGAACTCTTAAGGCTTCGGACCAGGCTTCATTCCCCTCAAA	Contig2096	109	23	22	30	34	47.7064	-53.1	-48.7156	-1.02115	GGGGAGGATGAAAAGTGAAGGTCTGGTGTGGGGAATGTTGTCTGGCTCGAGGCCACCAATAGACTGAATGATGACGTTCAGTTTGAGAGAGTTTTCTCGGACCAGGCTTCATTCCCCTCACTATCTTCTCTTTCTCTATCATTTTCTCT	Contig1055	149	31	31	39	48	46.9799	-69.8	-46.8456	-0.997143	GGTTGAGGGGAATGCTGTCTGGTTCGAGACCATTTCTCAGAAGCAAAAACAGAGCATCTTTCAAATGATCTCGGACCAGGCTTCATTCCCCCCCAACT	Contig1270	122	34	25	21	42	37.7049	-52.5	-43.0328	-1.1413
	bpe-miR166a-3p.G10T	21	TCGGACCAGTCTTCATTCCCC	TTTGAGGGGAATGTCGGCTGGCTCGAGGCTTTTTGGCTTTTGGCATGGGTGGTTTTCTCATGAAAAAAAGAACTCTTAAGGCTTCGGACCAGGCTTCATTCCCCTCAAA	Contig2096	109	23	22	30	34	47.7064	-53.1	-48.7156	-1.02115	GGGGAGGATGAAAAGTGAAGGTCTGGTGTGGGGAATGTTGTCTGGCTCGAGGCCACCAATAGACTGAATGATGACGTTCAGTTTGAGAGAGTTTTCTCGGACCAGGCTTCATTCCCCTCACTATCTTCTCTTTCTCTATCATTTTCTCT	Contig1055	149	31	31	39	48	46.9799	-69.8	-46.8456	-0.997143	GGTTGAGGGGAATGCTGTCTGGTTCGAGACCATTTCTCAGAAGCAAAAACAGAGCATCTTTCAAATGATCTCGGACCAGGCTTCATTCCCCCCCAACT	Contig1270	122	34	25	21	42	37.7049	-52.5	-43.0328	-1.1413
	bpe-miR166a-3p.C.T	23	TCGGACCAGGCTTCATTCCCCCT	TTTGAGGGGAATGTCGGCTGGCTCGAGGCTTTTTGGCTTTTGGCATGGGTGGTTTTCTCATGAAAAAAAGAACTCTTAAGGCTTCGGACCAGGCTTCATTCCCCTCAAA	Contig2096	109	23	22	30	34	47.7064	-53.1	-48.7156	-1.02115	GGGGAGGATGAAAAGTGAAGGTCTGGTGTGGGGAATGTTGTCTGGCTCGAGGCCACCAATAGACTGAATGATGACGTTCAGTTTGAGAGAGTTTTCTCGGACCAGGCTTCATTCCCCTCACTATCTTCTCTTTCTCTATCATTTTCTCT	Contig1055	149	31	31	39	48	46.9799	-69.8	-46.8456	-0.997143	GGTTGAGGGGAATGCTGTCTGGTTCGAGACCATTTCTCAGAAGCAAAAACAGAGCATCTTTCAAATGATCTCGGACCAGGCTTCATTCCCCCCCAACT	Contig1270	122	34	25	21	42	37.7049	-52.5	-43.0328	-1.1413
	bpe-miR166a-3p.C.A	23	TCGGACCAGGCTTCATTCCCCCA	TTTGAGGGGAATGTCGGCTGGCTCGAGGCTTTTTGGCTTTTGGCATGGGTGGTTTTCTCATGAAAAAAAGAACTCTTAAGGCTTCGGACCAGGCTTCATTCCCCTCAAA	Contig2096	109	23	22	30	34	47.7064	-53.1	-48.7156	-1.02115	GGGGAGGATGAAAAGTGAAGGTCTGGTGTGGGGAATGTTGTCTGGCTCGAGGCCACCAATAGACTGAATGATGACGTTCAGTTTGAGAGAGTTTTCTCGGACCAGGCTTCATTCCCCTCACTATCTTCTCTTTCTCTATCATTTTCTCT	Contig1055	149	31	31	39	48	46.9799	-69.8	-46.8456	-0.997143	GGTTGAGGGGAATGCTGTCTGGTTCGAGACCATTTCTCAGAAGCAAAAACAGAGCATCTTTCAAATGATCTCGGACCAGGCTTCATTCCCCCCCAACT	Contig1270	122	34	25	21	42	37.7049	-52.5	-43.0328	-1.1413
	bpe-miR166a-3p.ts.T	21	CGGACCAGGCTTCATTCCCCT	TTTGAGGGGAATGTCGGCTGGCTCGAGGCTTTTTGGCTTTTGGCATGGGTGGTTTTCTCATGAAAAAAAGAACTCTTAAGGCTTCGGACCAGGCTTCATTCCCCTCAAA	Contig2096	109	23	22	30	34	47.7064	-53.1	-48.7156	-1.02115	GGGGAGGATGAAAAGTGAAGGTCTGGTGTGGGGAATGTTGTCTGGCTCGAGGCCACCAATAGACTGAATGATGACGTTCAGTTTGAGAGAGTTTTCTCGGACCAGGCTTCATTCCCCTCACTATCTTCTCTTTCTCTATCATTTTCTCT	Contig1055	149	31	31	39	48	46.9799	-69.8	-46.8456	-0.997143	GGTTGAGGGGAATGCTGTCTGGTTCGAGACCATTTCTCAGAAGCAAAAACAGAGCATCTTTCAAATGATCTCGGACCAGGCTTCATTCCCCCCCAACT	Contig1270	122	34	25	21	42	37.7049	-52.5	-43.0328	-1.1413
	bpe-miR166a-3p.Gs.T16A.C18T.C	23	GTCGGACCAGGCTTCAATTCCCC	TTTGAGGGGAATGTCGGCTGGCTCGAGGCTTTTTGGCTTTTGGCATGGGTGGTTTTCTCATGAAAAAAAGAACTCTTAAGGCTTCGGACCAGGCTTCATTCCCCTCAAA	Contig2096	109	23	22	30	34	47.7064	-53.1	-48.7156	-1.02115	GGGGAGGATGAAAAGTGAAGGTCTGGTGTGGGGAATGTTGTCTGGCTCGAGGCCACCAATAGACTGAATGATGACGTTCAGTTTGAGAGAGTTTTCTCGGACCAGGCTTCATTCCCCTCACTATCTTCTCTTTCTCTATCATTTTCTCT	Contig1055	149	31	31	39	48	46.9799	-69.8	-46.8456	-0.997143	GGTTGAGGGGAATGCTGTCTGGTTCGAGACCATTTCTCAGAAGCAAAAACAGAGCATCTTTCAAATGATCTCGGACCAGGCTTCATTCCCCCCCAACT	Contig1270	122	34	25	21	42	37.7049	-52.5	-43.0328	-1.1413
	bpe-miR166a-3p.A8T	21	TCGGACCTGGCTTCATTCCCC	TTTGAGGGGAATGTCGGCTGGCTCGAGGCTTTTTGGCTTTTGGCATGGGTGGTTTTCTCATGAAAAAAAGAACTCTTAAGGCTTCGGACCAGGCTTCATTCCCCTCAAA	Contig2096	109	23	22	30	34	47.7064	-53.1	-48.7156	-1.02115	GGGGAGGATGAAAAGTGAAGGTCTGGTGTGGGGAATGTTGTCTGGCTCGAGGCCACCAATAGACTGAATGATGACGTTCAGTTTGAGAGAGTTTTCTCGGACCAGGCTTCATTCCCCTCACTATCTTCTCTTTCTCTATCATTTTCTCT	Contig1055	149	31	31	39	48	46.9799	-69.8	-46.8456	-0.997143	GGTTGAGGGGAATGCTGTCTGGTTCGAGACCATTTCTCAGAAGCAAAAACAGAGCATCTTTCAAATGATCTCGGACCAGGCTTCATTCCCCCCCAACT	Contig1270	122	34	25	21	42	37.7049	-52.5	-43.0328	-1.1413
	bpe-miR166a-3p.C18T	21	TCGGACCAGGCTTCATTTCCC	TTTGAGGGGAATGTCGGCTGGCTCGAGGCTTTTTGGCTTTTGGCATGGGTGGTTTTCTCATGAAAAAAAGAACTCTTAAGGCTTCGGACCAGGCTTCATTCCCCTCAAA	Contig2096	109	23	22	30	34	47.7064	-53.1	-48.7156	-1.02115	GGGGAGGATGAAAAGTGAAGGTCTGGTGTGGGGAATGTTGTCTGGCTCGAGGCCACCAATAGACTGAATGATGACGTTCAGTTTGAGAGAGTTTTCTCGGACCAGGCTTCATTCCCCTCACTATCTTCTCTTTCTCTATCATTTTCTCT	Contig1055	149	31	31	39	48	46.9799	-69.8	-46.8456	-0.997143	GGTTGAGGGGAATGCTGTCTGGTTCGAGACCATTTCTCAGAAGCAAAAACAGAGCATCTTTCAAATGATCTCGGACCAGGCTTCATTCCCCCCCAACT	Contig1270	122	34	25	21	42	37.7049	-52.5	-43.0328	-1.1413
	bpe-miR166a-3p.C6T	21	TCGGATCAGGCTTCATTCCCC	TTTGAGGGGAATGTCGGCTGGCTCGAGGCTTTTTGGCTTTTGGCATGGGTGGTTTTCTCATGAAAAAAAGAACTCTTAAGGCTTCGGACCAGGCTTCATTCCCCTCAAA	Contig2096	109	23	22	30	34	47.7064	-53.1	-48.7156	-1.02115	GGGGAGGATGAAAAGTGAAGGTCTGGTGTGGGGAATGTTGTCTGGCTCGAGGCCACCAATAGACTGAATGATGACGTTCAGTTTGAGAGAGTTTTCTCGGACCAGGCTTCATTCCCCTCACTATCTTCTCTTTCTCTATCATTTTCTCT	Contig1055	149	31	31	39	48	46.9799	-69.8	-46.8456	-0.997143	GGTTGAGGGGAATGCTGTCTGGTTCGAGACCATTTCTCAGAAGCAAAAACAGAGCATCTTTCAAATGATCTCGGACCAGGCTTCATTCCCCCCCAACT	Contig1270	122	34	25	21	42	37.7049	-52.5	-43.0328	-1.1413
	bpe-miR166a-3p.tcs.c	18	GGACCAGGCTTCATTCCC	TTTGAGGGGAATGTCGGCTGGCTCGAGGCTTTTTGGCTTTTGGCATGGGTGGTTTTCTCATGAAAAAAAGAACTCTTAAGGCTTCGGACCAGGCTTCATTCCCCTCAAA	Contig2096	109	23	22	30	34	47.7064	-53.1	-48.7156	-1.02115	GGGGAGGATGAAAAGTGAAGGTCTGGTGTGGGGAATGTTGTCTGGCTCGAGGCCACCAATAGACTGAATGATGACGTTCAGTTTGAGAGAGTTTTCTCGGACCAGGCTTCATTCCCCTCACTATCTTCTCTTTCTCTATCATTTTCTCT	Contig1055	149	31	31	39	48	46.9799	-69.8	-46.8456	-0.997143	GGTTGAGGGGAATGCTGTCTGGTTCGAGACCATTTCTCAGAAGCAAAAACAGAGCATCTTTCAAATGATCTCGGACCAGGCTTCATTCCCCCCCAACT	Contig1270	122	34	25	21	42	37.7049	-52.5	-43.0328	-1.1413
	bpe-miR166a-3p.TCs.C20T.GT	25	TCTCGGACCAGGCTTCATTCCTCGT	TTTGAGGGGAATGTCGGCTGGCTCGAGGCTTTTTGGCTTTTGGCATGGGTGGTTTTCTCATGAAAAAAAGAACTCTTAAGGCTTCGGACCAGGCTTCATTCCCCTCAAA	Contig2096	109	23	22	30	34	47.7064	-53.1	-48.7156	-1.02115	GGGGAGGATGAAAAGTGAAGGTCTGGTGTGGGGAATGTTGTCTGGCTCGAGGCCACCAATAGACTGAATGATGACGTTCAGTTTGAGAGAGTTTTCTCGGACCAGGCTTCATTCCCCTCACTATCTTCTCTTTCTCTATCATTTTCTCT	Contig1055	149	31	31	39	48	46.9799	-69.8	-46.8456	-0.997143	GGTTGAGGGGAATGCTGTCTGGTTCGAGACCATTTCTCAGAAGCAAAAACAGAGCATCTTTCAAATGATCTCGGACCAGGCTTCATTCCCCCCCAACT	Contig1270	122	34	25	21	42	37.7049	-52.5	-43.0328	-1.1413
	bpe-miR166a-3p.Ts.T1C	22	TCCGGACCAGGCTTCATTCCCC	TTTGAGGGGAATGTCGGCTGGCTCGAGGCTTTTTGGCTTTTGGCATGGGTGGTTTTCTCATGAAAAAAAGAACTCTTAAGGCTTCGGACCAGGCTTCATTCCCCTCAAA	Contig2096	109	23	22	30	34	47.7064	-53.1	-48.7156	-1.02115	GGGGAGGATGAAAAGTGAAGGTCTGGTGTGGGGAATGTTGTCTGGCTCGAGGCCACCAATAGACTGAATGATGACGTTCAGTTTGAGAGAGTTTTCTCGGACCAGGCTTCATTCCCCTCACTATCTTCTCTTTCTCTATCATTTTCTCT	Contig1055	149	31	31	39	48	46.9799	-69.8	-46.8456	-0.997143	GGTTGAGGGGAATGCTGTCTGGTTCGAGACCATTTCTCAGAAGCAAAAACAGAGCATCTTTCAAATGATCTCGGACCAGGCTTCATTCCCCCCCAACT	Contig1270	122	34	25	21	42	37.7049	-52.5	-43.0328	-1.1413
	bpe-miR166a-3p.Ts.T1A.G	23	TACGGACCAGGCTTCATTCCCCG	TTTGAGGGGAATGTCGGCTGGCTCGAGGCTTTTTGGCTTTTGGCATGGGTGGTTTTCTCATGAAAAAAAGAACTCTTAAGGCTTCGGACCAGGCTTCATTCCCCTCAAA	Contig2096	109	23	22	30	34	47.7064	-53.1	-48.7156	-1.02115	GGGGAGGATGAAAAGTGAAGGTCTGGTGTGGGGAATGTTGTCTGGCTCGAGGCCACCAATAGACTGAATGATGACGTTCAGTTTGAGAGAGTTTTCTCGGACCAGGCTTCATTCCCCTCACTATCTTCTCTTTCTCTATCATTTTCTCT	Contig1055	149	31	31	39	48	46.9799	-69.8	-46.8456	-0.997143	GGTTGAGGGGAATGCTGTCTGGTTCGAGACCATTTCTCAGAAGCAAAAACAGAGCATCTTTCAAATGATCTCGGACCAGGCTTCATTCCCCCCCAACT	Contig1270	122	34	25	21	42	37.7049	-52.5	-43.0328	-1.1413
	bpe-miR166a-3p.Gs.G	23	GTCGGACCAGGCTTCATTCCCCG	TTTGAGGGGAATGTCGGCTGGCTCGAGGCTTTTTGGCTTTTGGCATGGGTGGTTTTCTCATGAAAAAAAGAACTCTTAAGGCTTCGGACCAGGCTTCATTCCCCTCAAA	Contig2096	109	23	22	30	34	47.7064	-53.1	-48.7156	-1.02115	GGGGAGGATGAAAAGTGAAGGTCTGGTGTGGGGAATGTTGTCTGGCTCGAGGCCACCAATAGACTGAATGATGACGTTCAGTTTGAGAGAGTTTTCTCGGACCAGGCTTCATTCCCCTCACTATCTTCTCTTTCTCTATCATTTTCTCT	Contig1055	149	31	31	39	48	46.9799	-69.8	-46.8456	-0.997143	GGTTGAGGGGAATGCTGTCTGGTTCGAGACCATTTCTCAGAAGCAAAAACAGAGCATCTTTCAAATGATCTCGGACCAGGCTTCATTCCCCCCCAACT	Contig1270	122	34	25	21	42	37.7049	-52.5	-43.0328	-1.1413
	bpe-miR166a-3p.Gs.C	23	GTCGGACCAGGCTTCATTCCCCC	TTTGAGGGGAATGTCGGCTGGCTCGAGGCTTTTTGGCTTTTGGCATGGGTGGTTTTCTCATGAAAAAAAGAACTCTTAAGGCTTCGGACCAGGCTTCATTCCCCTCAAA	Contig2096	109	23	22	30	34	47.7064	-53.1	-48.7156	-1.02115	GGGGAGGATGAAAAGTGAAGGTCTGGTGTGGGGAATGTTGTCTGGCTCGAGGCCACCAATAGACTGAATGATGACGTTCAGTTTGAGAGAGTTTTCTCGGACCAGGCTTCATTCCCCTCACTATCTTCTCTTTCTCTATCATTTTCTCT	Contig1055	149	31	31	39	48	46.9799	-69.8	-46.8456	-0.997143	GGTTGAGGGGAATGCTGTCTGGTTCGAGACCATTTCTCAGAAGCAAAAACAGAGCATCTTTCAAATGATCTCGGACCAGGCTTCATTCCCCCCCAACT	Contig1270	122	34	25	21	42	37.7049	-52.5	-43.0328	-1.1413
	bpe-miR166a-3p.T16A	21	TCGGACCAGGCTTCAATCCCC	TTTGAGGGGAATGTCGGCTGGCTCGAGGCTTTTTGGCTTTTGGCATGGGTGGTTTTCTCATGAAAAAAAGAACTCTTAAGGCTTCGGACCAGGCTTCATTCCCCTCAAA	Contig2096	109	23	22	30	34	47.7064	-53.1	-48.7156	-1.02115	GGGGAGGATGAAAAGTGAAGGTCTGGTGTGGGGAATGTTGTCTGGCTCGAGGCCACCAATAGACTGAATGATGACGTTCAGTTTGAGAGAGTTTTCTCGGACCAGGCTTCATTCCCCTCACTATCTTCTCTTTCTCTATCATTTTCTCT	Contig1055	149	31	31	39	48	46.9799	-69.8	-46.8456	-0.997143	GGTTGAGGGGAATGCTGTCTGGTTCGAGACCATTTCTCAGAAGCAAAAACAGAGCATCTTTCAAATGATCTCGGACCAGGCTTCATTCCCCCCCAACT	Contig1270	122	34	25	21	42	37.7049	-52.5	-43.0328	-1.1413
	bpe-miR166a-3p.C11T	21	TCGGACCAGGTTTCATTCCCC	TTTGAGGGGAATGTCGGCTGGCTCGAGGCTTTTTGGCTTTTGGCATGGGTGGTTTTCTCATGAAAAAAAGAACTCTTAAGGCTTCGGACCAGGCTTCATTCCCCTCAAA	Contig2096	109	23	22	30	34	47.7064	-53.1	-48.7156	-1.02115	GGGGAGGATGAAAAGTGAAGGTCTGGTGTGGGGAATGTTGTCTGGCTCGAGGCCACCAATAGACTGAATGATGACGTTCAGTTTGAGAGAGTTTTCTCGGACCAGGCTTCATTCCCCTCACTATCTTCTCTTTCTCTATCATTTTCTCT	Contig1055	149	31	31	39	48	46.9799	-69.8	-46.8456	-0.997143	GGTTGAGGGGAATGCTGTCTGGTTCGAGACCATTTCTCAGAAGCAAAAACAGAGCATCTTTCAAATGATCTCGGACCAGGCTTCATTCCCCCCCAACT	Contig1270	122	34	25	21	42	37.7049	-52.5	-43.0328	-1.1413
	bpe-miR166a-3p.T16A.C18T.CC	23	TCGGACCAGGCTTCAATTCCCCC	TTTGAGGGGAATGTCGGCTGGCTCGAGGCTTTTTGGCTTTTGGCATGGGTGGTTTTCTCATGAAAAAAAGAACTCTTAAGGCTTCGGACCAGGCTTCATTCCCCTCAAA	Contig2096	109	23	22	30	34	47.7064	-53.1	-48.7156	-1.02115	GGGGAGGATGAAAAGTGAAGGTCTGGTGTGGGGAATGTTGTCTGGCTCGAGGCCACCAATAGACTGAATGATGACGTTCAGTTTGAGAGAGTTTTCTCGGACCAGGCTTCATTCCCCTCACTATCTTCTCTTTCTCTATCATTTTCTCT	Contig1055	149	31	31	39	48	46.9799	-69.8	-46.8456	-0.997143	GGTTGAGGGGAATGCTGTCTGGTTCGAGACCATTTCTCAGAAGCAAAAACAGAGCATCTTTCAAATGATCTCGGACCAGGCTTCATTCCCCCCCAACT	Contig1270	122	34	25	21	42	37.7049	-52.5	-43.0328	-1.1413
	bpe-miR166a-3p.CGs.c	22	CGTCGGACCAGGCTTCATTCCC	TTTGAGGGGAATGTCGGCTGGCTCGAGGCTTTTTGGCTTTTGGCATGGGTGGTTTTCTCATGAAAAAAAGAACTCTTAAGGCTTCGGACCAGGCTTCATTCCCCTCAAA	Contig2096	109	23	22	30	34	47.7064	-53.1	-48.7156	-1.02115	GGGGAGGATGAAAAGTGAAGGTCTGGTGTGGGGAATGTTGTCTGGCTCGAGGCCACCAATAGACTGAATGATGACGTTCAGTTTGAGAGAGTTTTCTCGGACCAGGCTTCATTCCCCTCACTATCTTCTCTTTCTCTATCATTTTCTCT	Contig1055	149	31	31	39	48	46.9799	-69.8	-46.8456	-0.997143	GGTTGAGGGGAATGCTGTCTGGTTCGAGACCATTTCTCAGAAGCAAAAACAGAGCATCTTTCAAATGATCTCGGACCAGGCTTCATTCCCCCCCAACT	Contig1270	122	34	25	21	42	37.7049	-52.5	-43.0328	-1.1413
	bpe-miR166a-3p.Gs.Ts.T1G	23	GTGCGGACCAGGCTTCATTCCCC	TTTGAGGGGAATGTCGGCTGGCTCGAGGCTTTTTGGCTTTTGGCATGGGTGGTTTTCTCATGAAAAAAAGAACTCTTAAGGCTTCGGACCAGGCTTCATTCCCCTCAAA	Contig2096	109	23	22	30	34	47.7064	-53.1	-48.7156	-1.02115	GGGGAGGATGAAAAGTGAAGGTCTGGTGTGGGGAATGTTGTCTGGCTCGAGGCCACCAATAGACTGAATGATGACGTTCAGTTTGAGAGAGTTTTCTCGGACCAGGCTTCATTCCCCTCACTATCTTCTCTTTCTCTATCATTTTCTCT	Contig1055	149	31	31	39	48	46.9799	-69.8	-46.8456	-0.997143	GGTTGAGGGGAATGCTGTCTGGTTCGAGACCATTTCTCAGAAGCAAAAACAGAGCATCTTTCAAATGATCTCGGACCAGGCTTCATTCCCCCCCAACT	Contig1270	122	34	25	21	42	37.7049	-52.5	-43.0328	-1.1413
	bpe-miR166a-3p.GGs	23	GGTCGGACCAGGCTTCATTCCCC	TTTGAGGGGAATGTCGGCTGGCTCGAGGCTTTTTGGCTTTTGGCATGGGTGGTTTTCTCATGAAAAAAAGAACTCTTAAGGCTTCGGACCAGGCTTCATTCCCCTCAAA	Contig2096	109	23	22	30	34	47.7064	-53.1	-48.7156	-1.02115	GGGGAGGATGAAAAGTGAAGGTCTGGTGTGGGGAATGTTGTCTGGCTCGAGGCCACCAATAGACTGAATGATGACGTTCAGTTTGAGAGAGTTTTCTCGGACCAGGCTTCATTCCCCTCACTATCTTCTCTTTCTCTATCATTTTCTCT	Contig1055	149	31	31	39	48	46.9799	-69.8	-46.8456	-0.997143	GGTTGAGGGGAATGCTGTCTGGTTCGAGACCATTTCTCAGAAGCAAAAACAGAGCATCTTTCAAATGATCTCGGACCAGGCTTCATTCCCCCCCAACT	Contig1270	122	34	25	21	42	37.7049	-52.5	-43.0328	-1.1413
	bpe-miR166a-3p.GCs	23	GCTCGGACCAGGCTTCATTCCCC	TTTGAGGGGAATGTCGGCTGGCTCGAGGCTTTTTGGCTTTTGGCATGGGTGGTTTTCTCATGAAAAAAAGAACTCTTAAGGCTTCGGACCAGGCTTCATTCCCCTCAAA	Contig2096	109	23	22	30	34	47.7064	-53.1	-48.7156	-1.02115	GGGGAGGATGAAAAGTGAAGGTCTGGTGTGGGGAATGTTGTCTGGCTCGAGGCCACCAATAGACTGAATGATGACGTTCAGTTTGAGAGAGTTTTCTCGGACCAGGCTTCATTCCCCTCACTATCTTCTCTTTCTCTATCATTTTCTCT	Contig1055	149	31	31	39	48	46.9799	-69.8	-46.8456	-0.997143	GGTTGAGGGGAATGCTGTCTGGTTCGAGACCATTTCTCAGAAGCAAAAACAGAGCATCTTTCAAATGATCTCGGACCAGGCTTCATTCCCCCCCAACT	Contig1270	122	34	25	21	42	37.7049	-52.5	-43.0328	-1.1413
	bpe-miR166a-3p.TCs.C20G	23	TCTCGGACCAGGCTTCATTCCGC	TTTGAGGGGAATGTCGGCTGGCTCGAGGCTTTTTGGCTTTTGGCATGGGTGGTTTTCTCATGAAAAAAAGAACTCTTAAGGCTTCGGACCAGGCTTCATTCCCCTCAAA	Contig2096	109	23	22	30	34	47.7064	-53.1	-48.7156	-1.02115	GGGGAGGATGAAAAGTGAAGGTCTGGTGTGGGGAATGTTGTCTGGCTCGAGGCCACCAATAGACTGAATGATGACGTTCAGTTTGAGAGAGTTTTCTCGGACCAGGCTTCATTCCCCTCACTATCTTCTCTTTCTCTATCATTTTCTCT	Contig1055	149	31	31	39	48	46.9799	-69.8	-46.8456	-0.997143	GGTTGAGGGGAATGCTGTCTGGTTCGAGACCATTTCTCAGAAGCAAAAACAGAGCATCTTTCAAATGATCTCGGACCAGGCTTCATTCCCCCCCAACT	Contig1270	122	34	25	21	42	37.7049	-52.5	-43.0328	-1.1413
	bpe-miR166a-3p.TCs.C	24	TCTCGGACCAGGCTTCATTCCCCC	TTTGAGGGGAATGTCGGCTGGCTCGAGGCTTTTTGGCTTTTGGCATGGGTGGTTTTCTCATGAAAAAAAGAACTCTTAAGGCTTCGGACCAGGCTTCATTCCCCTCAAA	Contig2096	109	23	22	30	34	47.7064	-53.1	-48.7156	-1.02115	GGGGAGGATGAAAAGTGAAGGTCTGGTGTGGGGAATGTTGTCTGGCTCGAGGCCACCAATAGACTGAATGATGACGTTCAGTTTGAGAGAGTTTTCTCGGACCAGGCTTCATTCCCCTCACTATCTTCTCTTTCTCTATCATTTTCTCT	Contig1055	149	31	31	39	48	46.9799	-69.8	-46.8456	-0.997143	GGTTGAGGGGAATGCTGTCTGGTTCGAGACCATTTCTCAGAAGCAAAAACAGAGCATCTTTCAAATGATCTCGGACCAGGCTTCATTCCCCCCCAACT	Contig1270	122	34	25	21	42	37.7049	-52.5	-43.0328	-1.1413
	bpe-miR166a-3p.Gs.C7T.c	21	GTCGGACTAGGCTTCATTCCC	TTTGAGGGGAATGTCGGCTGGCTCGAGGCTTTTTGGCTTTTGGCATGGGTGGTTTTCTCATGAAAAAAAGAACTCTTAAGGCTTCGGACCAGGCTTCATTCCCCTCAAA	Contig2096	109	23	22	30	34	47.7064	-53.1	-48.7156	-1.02115	GGGGAGGATGAAAAGTGAAGGTCTGGTGTGGGGAATGTTGTCTGGCTCGAGGCCACCAATAGACTGAATGATGACGTTCAGTTTGAGAGAGTTTTCTCGGACCAGGCTTCATTCCCCTCACTATCTTCTCTTTCTCTATCATTTTCTCT	Contig1055	149	31	31	39	48	46.9799	-69.8	-46.8456	-0.997143	GGTTGAGGGGAATGCTGTCTGGTTCGAGACCATTTCTCAGAAGCAAAAACAGAGCATCTTTCAAATGATCTCGGACCAGGCTTCATTCCCCCCCAACT	Contig1270	122	34	25	21	42	37.7049	-52.5	-43.0328	-1.1413
	bpe-miR166a-3p.Ts.T1A.C21A	22	TACGGACCAGGCTTCATTCCCA	TTTGAGGGGAATGTCGGCTGGCTCGAGGCTTTTTGGCTTTTGGCATGGGTGGTTTTCTCATGAAAAAAAGAACTCTTAAGGCTTCGGACCAGGCTTCATTCCCCTCAAA	Contig2096	109	23	22	30	34	47.7064	-53.1	-48.7156	-1.02115	GGGGAGGATGAAAAGTGAAGGTCTGGTGTGGGGAATGTTGTCTGGCTCGAGGCCACCAATAGACTGAATGATGACGTTCAGTTTGAGAGAGTTTTCTCGGACCAGGCTTCATTCCCCTCACTATCTTCTCTTTCTCTATCATTTTCTCT	Contig1055	149	31	31	39	48	46.9799	-69.8	-46.8456	-0.997143	GGTTGAGGGGAATGCTGTCTGGTTCGAGACCATTTCTCAGAAGCAAAAACAGAGCATCTTTCAAATGATCTCGGACCAGGCTTCATTCCCCCCCAACT	Contig1270	122	34	25	21	42	37.7049	-52.5	-43.0328	-1.1413
	bpe-miR166a-3p.Gs.T16A.C18T	22	GTCGGACCAGGCTTCAATTCCC	TTTGAGGGGAATGTCGGCTGGCTCGAGGCTTTTTGGCTTTTGGCATGGGTGGTTTTCTCATGAAAAAAAGAACTCTTAAGGCTTCGGACCAGGCTTCATTCCCCTCAAA	Contig2096	109	23	22	30	34	47.7064	-53.1	-48.7156	-1.02115	GGGGAGGATGAAAAGTGAAGGTCTGGTGTGGGGAATGTTGTCTGGCTCGAGGCCACCAATAGACTGAATGATGACGTTCAGTTTGAGAGAGTTTTCTCGGACCAGGCTTCATTCCCCTCACTATCTTCTCTTTCTCTATCATTTTCTCT	Contig1055	149	31	31	39	48	46.9799	-69.8	-46.8456	-0.997143	GGTTGAGGGGAATGCTGTCTGGTTCGAGACCATTTCTCAGAAGCAAAAACAGAGCATCTTTCAAATGATCTCGGACCAGGCTTCATTCCCCCCCAACT	Contig1270	122	34	25	21	42	37.7049	-52.5	-43.0328	-1.1413
	bpe-miR166a-3p.Ts.T1G.G	23	TGCGGACCAGGCTTCATTCCCCG	TTTGAGGGGAATGTCGGCTGGCTCGAGGCTTTTTGGCTTTTGGCATGGGTGGTTTTCTCATGAAAAAAAGAACTCTTAAGGCTTCGGACCAGGCTTCATTCCCCTCAAA	Contig2096	109	23	22	30	34	47.7064	-53.1	-48.7156	-1.02115	GGGGAGGATGAAAAGTGAAGGTCTGGTGTGGGGAATGTTGTCTGGCTCGAGGCCACCAATAGACTGAATGATGACGTTCAGTTTGAGAGAGTTTTCTCGGACCAGGCTTCATTCCCCTCACTATCTTCTCTTTCTCTATCATTTTCTCT	Contig1055	149	31	31	39	48	46.9799	-69.8	-46.8456	-0.997143	GGTTGAGGGGAATGCTGTCTGGTTCGAGACCATTTCTCAGAAGCAAAAACAGAGCATCTTTCAAATGATCTCGGACCAGGCTTCATTCCCCCCCAACT	Contig1270	122	34	25	21	42	37.7049	-52.5	-43.0328	-1.1413
	bpe-miR166a-3p.Ts.T1G.C	23	TGCGGACCAGGCTTCATTCCCCC	TTTGAGGGGAATGTCGGCTGGCTCGAGGCTTTTTGGCTTTTGGCATGGGTGGTTTTCTCATGAAAAAAAGAACTCTTAAGGCTTCGGACCAGGCTTCATTCCCCTCAAA	Contig2096	109	23	22	30	34	47.7064	-53.1	-48.7156	-1.02115	GGGGAGGATGAAAAGTGAAGGTCTGGTGTGGGGAATGTTGTCTGGCTCGAGGCCACCAATAGACTGAATGATGACGTTCAGTTTGAGAGAGTTTTCTCGGACCAGGCTTCATTCCCCTCACTATCTTCTCTTTCTCTATCATTTTCTCT	Contig1055	149	31	31	39	48	46.9799	-69.8	-46.8456	-0.997143	GGTTGAGGGGAATGCTGTCTGGTTCGAGACCATTTCTCAGAAGCAAAAACAGAGCATCTTTCAAATGATCTCGGACCAGGCTTCATTCCCCCCCAACT	Contig1270	122	34	25	21	42	37.7049	-52.5	-43.0328	-1.1413
	bpe-miR166a-3p.Ts.T1C.C	23	TCCGGACCAGGCTTCATTCCCCC	TTTGAGGGGAATGTCGGCTGGCTCGAGGCTTTTTGGCTTTTGGCATGGGTGGTTTTCTCATGAAAAAAAGAACTCTTAAGGCTTCGGACCAGGCTTCATTCCCCTCAAA	Contig2096	109	23	22	30	34	47.7064	-53.1	-48.7156	-1.02115	GGGGAGGATGAAAAGTGAAGGTCTGGTGTGGGGAATGTTGTCTGGCTCGAGGCCACCAATAGACTGAATGATGACGTTCAGTTTGAGAGAGTTTTCTCGGACCAGGCTTCATTCCCCTCACTATCTTCTCTTTCTCTATCATTTTCTCT	Contig1055	149	31	31	39	48	46.9799	-69.8	-46.8456	-0.997143	GGTTGAGGGGAATGCTGTCTGGTTCGAGACCATTTCTCAGAAGCAAAAACAGAGCATCTTTCAAATGATCTCGGACCAGGCTTCATTCCCCCCCAACT	Contig1270	122	34	25	21	42	37.7049	-52.5	-43.0328	-1.1413
	bpe-miR166a-3p.Ts.CC	24	TTCGGACCAGGCTTCATTCCCCCC	TTTGAGGGGAATGTCGGCTGGCTCGAGGCTTTTTGGCTTTTGGCATGGGTGGTTTTCTCATGAAAAAAAGAACTCTTAAGGCTTCGGACCAGGCTTCATTCCCCTCAAA	Contig2096	109	23	22	30	34	47.7064	-53.1	-48.7156	-1.02115	GGGGAGGATGAAAAGTGAAGGTCTGGTGTGGGGAATGTTGTCTGGCTCGAGGCCACCAATAGACTGAATGATGACGTTCAGTTTGAGAGAGTTTTCTCGGACCAGGCTTCATTCCCCTCACTATCTTCTCTTTCTCTATCATTTTCTCT	Contig1055	149	31	31	39	48	46.9799	-69.8	-46.8456	-0.997143	GGTTGAGGGGAATGCTGTCTGGTTCGAGACCATTTCTCAGAAGCAAAAACAGAGCATCTTTCAAATGATCTCGGACCAGGCTTCATTCCCCCCCAACT	Contig1270	122	34	25	21	42	37.7049	-52.5	-43.0328	-1.1413
	bpe-miR166a-3p.T17G	21	TCGGACCAGGCTTCATGCCCC	TTTGAGGGGAATGTCGGCTGGCTCGAGGCTTTTTGGCTTTTGGCATGGGTGGTTTTCTCATGAAAAAAAGAACTCTTAAGGCTTCGGACCAGGCTTCATTCCCCTCAAA	Contig2096	109	23	22	30	34	47.7064	-53.1	-48.7156	-1.02115	GGGGAGGATGAAAAGTGAAGGTCTGGTGTGGGGAATGTTGTCTGGCTCGAGGCCACCAATAGACTGAATGATGACGTTCAGTTTGAGAGAGTTTTCTCGGACCAGGCTTCATTCCCCTCACTATCTTCTCTTTCTCTATCATTTTCTCT	Contig1055	149	31	31	39	48	46.9799	-69.8	-46.8456	-0.997143	GGTTGAGGGGAATGCTGTCTGGTTCGAGACCATTTCTCAGAAGCAAAAACAGAGCATCTTTCAAATGATCTCGGACCAGGCTTCATTCCCCCCCAACT	Contig1270	122	34	25	21	42	37.7049	-52.5	-43.0328	-1.1413
	bpe-miR166a-3p.T13A	21	TCGGACCAGGCTACATTCCCC	TTTGAGGGGAATGTCGGCTGGCTCGAGGCTTTTTGGCTTTTGGCATGGGTGGTTTTCTCATGAAAAAAAGAACTCTTAAGGCTTCGGACCAGGCTTCATTCCCCTCAAA	Contig2096	109	23	22	30	34	47.7064	-53.1	-48.7156	-1.02115	GGGGAGGATGAAAAGTGAAGGTCTGGTGTGGGGAATGTTGTCTGGCTCGAGGCCACCAATAGACTGAATGATGACGTTCAGTTTGAGAGAGTTTTCTCGGACCAGGCTTCATTCCCCTCACTATCTTCTCTTTCTCTATCATTTTCTCT	Contig1055	149	31	31	39	48	46.9799	-69.8	-46.8456	-0.997143	GGTTGAGGGGAATGCTGTCTGGTTCGAGACCATTTCTCAGAAGCAAAAACAGAGCATCTTTCAAATGATCTCGGACCAGGCTTCATTCCCCCCCAACT	Contig1270	122	34	25	21	42	37.7049	-52.5	-43.0328	-1.1413
	bpe-miR166a-3p.G4T	21	TCGTACCAGGCTTCATTCCCC	TTTGAGGGGAATGTCGGCTGGCTCGAGGCTTTTTGGCTTTTGGCATGGGTGGTTTTCTCATGAAAAAAAGAACTCTTAAGGCTTCGGACCAGGCTTCATTCCCCTCAAA	Contig2096	109	23	22	30	34	47.7064	-53.1	-48.7156	-1.02115	GGGGAGGATGAAAAGTGAAGGTCTGGTGTGGGGAATGTTGTCTGGCTCGAGGCCACCAATAGACTGAATGATGACGTTCAGTTTGAGAGAGTTTTCTCGGACCAGGCTTCATTCCCCTCACTATCTTCTCTTTCTCTATCATTTTCTCT	Contig1055	149	31	31	39	48	46.9799	-69.8	-46.8456	-0.997143	GGTTGAGGGGAATGCTGTCTGGTTCGAGACCATTTCTCAGAAGCAAAAACAGAGCATCTTTCAAATGATCTCGGACCAGGCTTCATTCCCCCCCAACT	Contig1270	122	34	25	21	42	37.7049	-52.5	-43.0328	-1.1413
	bpe-miR166a-3p.T16C	21	TCGGACCAGGCTTCACTCCCC	TTTGAGGGGAATGTCGGCTGGCTCGAGGCTTTTTGGCTTTTGGCATGGGTGGTTTTCTCATGAAAAAAAGAACTCTTAAGGCTTCGGACCAGGCTTCATTCCCCTCAAA	Contig2096	109	23	22	30	34	47.7064	-53.1	-48.7156	-1.02115	GGGGAGGATGAAAAGTGAAGGTCTGGTGTGGGGAATGTTGTCTGGCTCGAGGCCACCAATAGACTGAATGATGACGTTCAGTTTGAGAGAGTTTTCTCGGACCAGGCTTCATTCCCCTCACTATCTTCTCTTTCTCTATCATTTTCTCT	Contig1055	149	31	31	39	48	46.9799	-69.8	-46.8456	-0.997143	GGTTGAGGGGAATGCTGTCTGGTTCGAGACCATTTCTCAGAAGCAAAAACAGAGCATCTTTCAAATGATCTCGGACCAGGCTTCATTCCCCCCCAACT	Contig1270	122	34	25	21	42	37.7049	-52.5	-43.0328	-1.1413
	bpe-miR166a-3p.C20A	21	TCGGACCAGGCTTCATTCCAC	TTTGAGGGGAATGTCGGCTGGCTCGAGGCTTTTTGGCTTTTGGCATGGGTGGTTTTCTCATGAAAAAAAGAACTCTTAAGGCTTCGGACCAGGCTTCATTCCCCTCAAA	Contig2096	109	23	22	30	34	47.7064	-53.1	-48.7156	-1.02115	GGGGAGGATGAAAAGTGAAGGTCTGGTGTGGGGAATGTTGTCTGGCTCGAGGCCACCAATAGACTGAATGATGACGTTCAGTTTGAGAGAGTTTTCTCGGACCAGGCTTCATTCCCCTCACTATCTTCTCTTTCTCTATCATTTTCTCT	Contig1055	149	31	31	39	48	46.9799	-69.8	-46.8456	-0.997143	GGTTGAGGGGAATGCTGTCTGGTTCGAGACCATTTCTCAGAAGCAAAAACAGAGCATCTTTCAAATGATCTCGGACCAGGCTTCATTCCCCCCCAACT	Contig1270	122	34	25	21	42	37.7049	-52.5	-43.0328	-1.1413
	bpe-miR166a-3p.T16A.C18T	21	TCGGACCAGGCTTCAATTCCC	TTTGAGGGGAATGTCGGCTGGCTCGAGGCTTTTTGGCTTTTGGCATGGGTGGTTTTCTCATGAAAAAAAGAACTCTTAAGGCTTCGGACCAGGCTTCATTCCCCTCAAA	Contig2096	109	23	22	30	34	47.7064	-53.1	-48.7156	-1.02115	GGGGAGGATGAAAAGTGAAGGTCTGGTGTGGGGAATGTTGTCTGGCTCGAGGCCACCAATAGACTGAATGATGACGTTCAGTTTGAGAGAGTTTTCTCGGACCAGGCTTCATTCCCCTCACTATCTTCTCTTTCTCTATCATTTTCTCT	Contig1055	149	31	31	39	48	46.9799	-69.8	-46.8456	-0.997143	GGTTGAGGGGAATGCTGTCTGGTTCGAGACCATTTCTCAGAAGCAAAAACAGAGCATCTTTCAAATGATCTCGGACCAGGCTTCATTCCCCCCCAACT	Contig1270	122	34	25	21	42	37.7049	-52.5	-43.0328	-1.1413
	bpe-miR166a-3p.C18T.C	22	TCGGACCAGGCTTCATTTCCCC	TTTGAGGGGAATGTCGGCTGGCTCGAGGCTTTTTGGCTTTTGGCATGGGTGGTTTTCTCATGAAAAAAAGAACTCTTAAGGCTTCGGACCAGGCTTCATTCCCCTCAAA	Contig2096	109	23	22	30	34	47.7064	-53.1	-48.7156	-1.02115	GGGGAGGATGAAAAGTGAAGGTCTGGTGTGGGGAATGTTGTCTGGCTCGAGGCCACCAATAGACTGAATGATGACGTTCAGTTTGAGAGAGTTTTCTCGGACCAGGCTTCATTCCCCTCACTATCTTCTCTTTCTCTATCATTTTCTCT	Contig1055	149	31	31	39	48	46.9799	-69.8	-46.8456	-0.997143	GGTTGAGGGGAATGCTGTCTGGTTCGAGACCATTTCTCAGAAGCAAAAACAGAGCATCTTTCAAATGATCTCGGACCAGGCTTCATTCCCCCCCAACT	Contig1270	122	34	25	21	42	37.7049	-52.5	-43.0328	-1.1413
	bpe-miR166a-3p.C.G	23	TCGGACCAGGCTTCATTCCCCCG	TTTGAGGGGAATGTCGGCTGGCTCGAGGCTTTTTGGCTTTTGGCATGGGTGGTTTTCTCATGAAAAAAAGAACTCTTAAGGCTTCGGACCAGGCTTCATTCCCCTCAAA	Contig2096	109	23	22	30	34	47.7064	-53.1	-48.7156	-1.02115	GGGGAGGATGAAAAGTGAAGGTCTGGTGTGGGGAATGTTGTCTGGCTCGAGGCCACCAATAGACTGAATGATGACGTTCAGTTTGAGAGAGTTTTCTCGGACCAGGCTTCATTCCCCTCACTATCTTCTCTTTCTCTATCATTTTCTCT	Contig1055	149	31	31	39	48	46.9799	-69.8	-46.8456	-0.997143	GGTTGAGGGGAATGCTGTCTGGTTCGAGACCATTTCTCAGAAGCAAAAACAGAGCATCTTTCAAATGATCTCGGACCAGGCTTCATTCCCCCCCAACT	Contig1270	122	34	25	21	42	37.7049	-52.5	-43.0328	-1.1413
	bpe-miR166a-3p.ts.TT	22	CGGACCAGGCTTCATTCCCCTT	TTTGAGGGGAATGTCGGCTGGCTCGAGGCTTTTTGGCTTTTGGCATGGGTGGTTTTCTCATGAAAAAAAGAACTCTTAAGGCTTCGGACCAGGCTTCATTCCCCTCAAA	Contig2096	109	23	22	30	34	47.7064	-53.1	-48.7156	-1.02115	GGGGAGGATGAAAAGTGAAGGTCTGGTGTGGGGAATGTTGTCTGGCTCGAGGCCACCAATAGACTGAATGATGACGTTCAGTTTGAGAGAGTTTTCTCGGACCAGGCTTCATTCCCCTCACTATCTTCTCTTTCTCTATCATTTTCTCT	Contig1055	149	31	31	39	48	46.9799	-69.8	-46.8456	-0.997143	GGTTGAGGGGAATGCTGTCTGGTTCGAGACCATTTCTCAGAAGCAAAAACAGAGCATCTTTCAAATGATCTCGGACCAGGCTTCATTCCCCCCCAACT	Contig1270	122	34	25	21	42	37.7049	-52.5	-43.0328	-1.1413
	bpe-miR166a-3p.tcs.T	20	GGACCAGGCTTCATTCCCCT	TTTGAGGGGAATGTCGGCTGGCTCGAGGCTTTTTGGCTTTTGGCATGGGTGGTTTTCTCATGAAAAAAAGAACTCTTAAGGCTTCGGACCAGGCTTCATTCCCCTCAAA	Contig2096	109	23	22	30	34	47.7064	-53.1	-48.7156	-1.02115	GGGGAGGATGAAAAGTGAAGGTCTGGTGTGGGGAATGTTGTCTGGCTCGAGGCCACCAATAGACTGAATGATGACGTTCAGTTTGAGAGAGTTTTCTCGGACCAGGCTTCATTCCCCTCACTATCTTCTCTTTCTCTATCATTTTCTCT	Contig1055	149	31	31	39	48	46.9799	-69.8	-46.8456	-0.997143	GGTTGAGGGGAATGCTGTCTGGTTCGAGACCATTTCTCAGAAGCAAAAACAGAGCATCTTTCAAATGATCTCGGACCAGGCTTCATTCCCCCCCAACT	Contig1270	122	34	25	21	42	37.7049	-52.5	-43.0328	-1.1413
	bpe-miR166a-3p.TTs.T1G	23	TTGCGGACCAGGCTTCATTCCCC	TTTGAGGGGAATGTCGGCTGGCTCGAGGCTTTTTGGCTTTTGGCATGGGTGGTTTTCTCATGAAAAAAAGAACTCTTAAGGCTTCGGACCAGGCTTCATTCCCCTCAAA	Contig2096	109	23	22	30	34	47.7064	-53.1	-48.7156	-1.02115	GGGGAGGATGAAAAGTGAAGGTCTGGTGTGGGGAATGTTGTCTGGCTCGAGGCCACCAATAGACTGAATGATGACGTTCAGTTTGAGAGAGTTTTCTCGGACCAGGCTTCATTCCCCTCACTATCTTCTCTTTCTCTATCATTTTCTCT	Contig1055	149	31	31	39	48	46.9799	-69.8	-46.8456	-0.997143	GGTTGAGGGGAATGCTGTCTGGTTCGAGACCATTTCTCAGAAGCAAAAACAGAGCATCTTTCAAATGATCTCGGACCAGGCTTCATTCCCCCCCAACT	Contig1270	122	34	25	21	42	37.7049	-52.5	-43.0328	-1.1413
	bpe-miR166a-3p.Gs.Ts.cc	21	GTTCGGACCAGGCTTCATTCC	TTTGAGGGGAATGTCGGCTGGCTCGAGGCTTTTTGGCTTTTGGCATGGGTGGTTTTCTCATGAAAAAAAGAACTCTTAAGGCTTCGGACCAGGCTTCATTCCCCTCAAA	Contig2096	109	23	22	30	34	47.7064	-53.1	-48.7156	-1.02115	GGGGAGGATGAAAAGTGAAGGTCTGGTGTGGGGAATGTTGTCTGGCTCGAGGCCACCAATAGACTGAATGATGACGTTCAGTTTGAGAGAGTTTTCTCGGACCAGGCTTCATTCCCCTCACTATCTTCTCTTTCTCTATCATTTTCTCT	Contig1055	149	31	31	39	48	46.9799	-69.8	-46.8456	-0.997143	GGTTGAGGGGAATGCTGTCTGGTTCGAGACCATTTCTCAGAAGCAAAAACAGAGCATCTTTCAAATGATCTCGGACCAGGCTTCATTCCCCCCCAACT	Contig1270	122	34	25	21	42	37.7049	-52.5	-43.0328	-1.1413
	bpe-miR166a-3p.TCs.C21A	23	TCTCGGACCAGGCTTCATTCCCA	TTTGAGGGGAATGTCGGCTGGCTCGAGGCTTTTTGGCTTTTGGCATGGGTGGTTTTCTCATGAAAAAAAGAACTCTTAAGGCTTCGGACCAGGCTTCATTCCCCTCAAA	Contig2096	109	23	22	30	34	47.7064	-53.1	-48.7156	-1.02115	GGGGAGGATGAAAAGTGAAGGTCTGGTGTGGGGAATGTTGTCTGGCTCGAGGCCACCAATAGACTGAATGATGACGTTCAGTTTGAGAGAGTTTTCTCGGACCAGGCTTCATTCCCCTCACTATCTTCTCTTTCTCTATCATTTTCTCT	Contig1055	149	31	31	39	48	46.9799	-69.8	-46.8456	-0.997143	GGTTGAGGGGAATGCTGTCTGGTTCGAGACCATTTCTCAGAAGCAAAAACAGAGCATCTTTCAAATGATCTCGGACCAGGCTTCATTCCCCCCCAACT	Contig1270	122	34	25	21	42	37.7049	-52.5	-43.0328	-1.1413
	bpe-miR166a-3p.TTs.T1C.C2T	23	TTCTGGACCAGGCTTCATTCCCC	TTTGAGGGGAATGTCGGCTGGCTCGAGGCTTTTTGGCTTTTGGCATGGGTGGTTTTCTCATGAAAAAAAGAACTCTTAAGGCTTCGGACCAGGCTTCATTCCCCTCAAA	Contig2096	109	23	22	30	34	47.7064	-53.1	-48.7156	-1.02115	GGGGAGGATGAAAAGTGAAGGTCTGGTGTGGGGAATGTTGTCTGGCTCGAGGCCACCAATAGACTGAATGATGACGTTCAGTTTGAGAGAGTTTTCTCGGACCAGGCTTCATTCCCCTCACTATCTTCTCTTTCTCTATCATTTTCTCT	Contig1055	149	31	31	39	48	46.9799	-69.8	-46.8456	-0.997143	GGTTGAGGGGAATGCTGTCTGGTTCGAGACCATTTCTCAGAAGCAAAAACAGAGCATCTTTCAAATGATCTCGGACCAGGCTTCATTCCCCCCCAACT	Contig1270	122	34	25	21	42	37.7049	-52.5	-43.0328	-1.1413
	bpe-miR166a-3p.GGs.C7T.c	22	GGTCGGACTAGGCTTCATTCCC	TTTGAGGGGAATGTCGGCTGGCTCGAGGCTTTTTGGCTTTTGGCATGGGTGGTTTTCTCATGAAAAAAAGAACTCTTAAGGCTTCGGACCAGGCTTCATTCCCCTCAAA	Contig2096	109	23	22	30	34	47.7064	-53.1	-48.7156	-1.02115	GGGGAGGATGAAAAGTGAAGGTCTGGTGTGGGGAATGTTGTCTGGCTCGAGGCCACCAATAGACTGAATGATGACGTTCAGTTTGAGAGAGTTTTCTCGGACCAGGCTTCATTCCCCTCACTATCTTCTCTTTCTCTATCATTTTCTCT	Contig1055	149	31	31	39	48	46.9799	-69.8	-46.8456	-0.997143	GGTTGAGGGGAATGCTGTCTGGTTCGAGACCATTTCTCAGAAGCAAAAACAGAGCATCTTTCAAATGATCTCGGACCAGGCTTCATTCCCCCCCAACT	Contig1270	122	34	25	21	42	37.7049	-52.5	-43.0328	-1.1413
	bpe-miR166a-3p.Gs.Ts.T1A	23	GTACGGACCAGGCTTCATTCCCC	TTTGAGGGGAATGTCGGCTGGCTCGAGGCTTTTTGGCTTTTGGCATGGGTGGTTTTCTCATGAAAAAAAGAACTCTTAAGGCTTCGGACCAGGCTTCATTCCCCTCAAA	Contig2096	109	23	22	30	34	47.7064	-53.1	-48.7156	-1.02115	GGGGAGGATGAAAAGTGAAGGTCTGGTGTGGGGAATGTTGTCTGGCTCGAGGCCACCAATAGACTGAATGATGACGTTCAGTTTGAGAGAGTTTTCTCGGACCAGGCTTCATTCCCCTCACTATCTTCTCTTTCTCTATCATTTTCTCT	Contig1055	149	31	31	39	48	46.9799	-69.8	-46.8456	-0.997143	GGTTGAGGGGAATGCTGTCTGGTTCGAGACCATTTCTCAGAAGCAAAAACAGAGCATCTTTCAAATGATCTCGGACCAGGCTTCATTCCCCCCCAACT	Contig1270	122	34	25	21	42	37.7049	-52.5	-43.0328	-1.1413
	bpe-miR166a-3p.TGs.T1C.C2G.C	24	TGCGGGACCAGGCTTCATTCCCCC	TTTGAGGGGAATGTCGGCTGGCTCGAGGCTTTTTGGCTTTTGGCATGGGTGGTTTTCTCATGAAAAAAAGAACTCTTAAGGCTTCGGACCAGGCTTCATTCCCCTCAAA	Contig2096	109	23	22	30	34	47.7064	-53.1	-48.7156	-1.02115	GGGGAGGATGAAAAGTGAAGGTCTGGTGTGGGGAATGTTGTCTGGCTCGAGGCCACCAATAGACTGAATGATGACGTTCAGTTTGAGAGAGTTTTCTCGGACCAGGCTTCATTCCCCTCACTATCTTCTCTTTCTCTATCATTTTCTCT	Contig1055	149	31	31	39	48	46.9799	-69.8	-46.8456	-0.997143	GGTTGAGGGGAATGCTGTCTGGTTCGAGACCATTTCTCAGAAGCAAAAACAGAGCATCTTTCAAATGATCTCGGACCAGGCTTCATTCCCCCCCAACT	Contig1270	122	34	25	21	42	37.7049	-52.5	-43.0328	-1.1413
	bpe-miR166a-3p.Cs.Ts	23	CTTCGGACCAGGCTTCATTCCCC	TTTGAGGGGAATGTCGGCTGGCTCGAGGCTTTTTGGCTTTTGGCATGGGTGGTTTTCTCATGAAAAAAAGAACTCTTAAGGCTTCGGACCAGGCTTCATTCCCCTCAAA	Contig2096	109	23	22	30	34	47.7064	-53.1	-48.7156	-1.02115	GGGGAGGATGAAAAGTGAAGGTCTGGTGTGGGGAATGTTGTCTGGCTCGAGGCCACCAATAGACTGAATGATGACGTTCAGTTTGAGAGAGTTTTCTCGGACCAGGCTTCATTCCCCTCACTATCTTCTCTTTCTCTATCATTTTCTCT	Contig1055	149	31	31	39	48	46.9799	-69.8	-46.8456	-0.997143	GGTTGAGGGGAATGCTGTCTGGTTCGAGACCATTTCTCAGAAGCAAAAACAGAGCATCTTTCAAATGATCTCGGACCAGGCTTCATTCCCCCCCAACT	Contig1270	122	34	25	21	42	37.7049	-52.5	-43.0328	-1.1413
	bpe-miR166a-3p.TCs.C21G.C	24	TCTCGGACCAGGCTTCATTCCCGC	TTTGAGGGGAATGTCGGCTGGCTCGAGGCTTTTTGGCTTTTGGCATGGGTGGTTTTCTCATGAAAAAAAGAACTCTTAAGGCTTCGGACCAGGCTTCATTCCCCTCAAA	Contig2096	109	23	22	30	34	47.7064	-53.1	-48.7156	-1.02115	GGGGAGGATGAAAAGTGAAGGTCTGGTGTGGGGAATGTTGTCTGGCTCGAGGCCACCAATAGACTGAATGATGACGTTCAGTTTGAGAGAGTTTTCTCGGACCAGGCTTCATTCCCCTCACTATCTTCTCTTTCTCTATCATTTTCTCT	Contig1055	149	31	31	39	48	46.9799	-69.8	-46.8456	-0.997143	GGTTGAGGGGAATGCTGTCTGGTTCGAGACCATTTCTCAGAAGCAAAAACAGAGCATCTTTCAAATGATCTCGGACCAGGCTTCATTCCCCCCCAACT	Contig1270	122	34	25	21	42	37.7049	-52.5	-43.0328	-1.1413
	bpe-miR166a-3p.TCs.T1C.C2G	23	TCCGGGACCAGGCTTCATTCCCC	TTTGAGGGGAATGTCGGCTGGCTCGAGGCTTTTTGGCTTTTGGCATGGGTGGTTTTCTCATGAAAAAAAGAACTCTTAAGGCTTCGGACCAGGCTTCATTCCCCTCAAA	Contig2096	109	23	22	30	34	47.7064	-53.1	-48.7156	-1.02115	GGGGAGGATGAAAAGTGAAGGTCTGGTGTGGGGAATGTTGTCTGGCTCGAGGCCACCAATAGACTGAATGATGACGTTCAGTTTGAGAGAGTTTTCTCGGACCAGGCTTCATTCCCCTCACTATCTTCTCTTTCTCTATCATTTTCTCT	Contig1055	149	31	31	39	48	46.9799	-69.8	-46.8456	-0.997143	GGTTGAGGGGAATGCTGTCTGGTTCGAGACCATTTCTCAGAAGCAAAAACAGAGCATCTTTCAAATGATCTCGGACCAGGCTTCATTCCCCCCCAACT	Contig1270	122	34	25	21	42	37.7049	-52.5	-43.0328	-1.1413
	bpe-miR166a-3p.Gs.Ts.T1G.cc	21	GTGCGGACCAGGCTTCATTCC	TTTGAGGGGAATGTCGGCTGGCTCGAGGCTTTTTGGCTTTTGGCATGGGTGGTTTTCTCATGAAAAAAAGAACTCTTAAGGCTTCGGACCAGGCTTCATTCCCCTCAAA	Contig2096	109	23	22	30	34	47.7064	-53.1	-48.7156	-1.02115	GGGGAGGATGAAAAGTGAAGGTCTGGTGTGGGGAATGTTGTCTGGCTCGAGGCCACCAATAGACTGAATGATGACGTTCAGTTTGAGAGAGTTTTCTCGGACCAGGCTTCATTCCCCTCACTATCTTCTCTTTCTCTATCATTTTCTCT	Contig1055	149	31	31	39	48	46.9799	-69.8	-46.8456	-0.997143	GGTTGAGGGGAATGCTGTCTGGTTCGAGACCATTTCTCAGAAGCAAAAACAGAGCATCTTTCAAATGATCTCGGACCAGGCTTCATTCCCCCCCAACT	Contig1270	122	34	25	21	42	37.7049	-52.5	-43.0328	-1.1413
	bpe-miR166a-3p.TCs.C20G.C	24	TCTCGGACCAGGCTTCATTCCGCC	TTTGAGGGGAATGTCGGCTGGCTCGAGGCTTTTTGGCTTTTGGCATGGGTGGTTTTCTCATGAAAAAAAGAACTCTTAAGGCTTCGGACCAGGCTTCATTCCCCTCAAA	Contig2096	109	23	22	30	34	47.7064	-53.1	-48.7156	-1.02115	GGGGAGGATGAAAAGTGAAGGTCTGGTGTGGGGAATGTTGTCTGGCTCGAGGCCACCAATAGACTGAATGATGACGTTCAGTTTGAGAGAGTTTTCTCGGACCAGGCTTCATTCCCCTCACTATCTTCTCTTTCTCTATCATTTTCTCT	Contig1055	149	31	31	39	48	46.9799	-69.8	-46.8456	-0.997143	GGTTGAGGGGAATGCTGTCTGGTTCGAGACCATTTCTCAGAAGCAAAAACAGAGCATCTTTCAAATGATCTCGGACCAGGCTTCATTCCCCCCCAACT	Contig1270	122	34	25	21	42	37.7049	-52.5	-43.0328	-1.1413
	bpe-miR166a-3p.TCs.C21A.C	24	TCTCGGACCAGGCTTCATTCCCAC	TTTGAGGGGAATGTCGGCTGGCTCGAGGCTTTTTGGCTTTTGGCATGGGTGGTTTTCTCATGAAAAAAAGAACTCTTAAGGCTTCGGACCAGGCTTCATTCCCCTCAAA	Contig2096	109	23	22	30	34	47.7064	-53.1	-48.7156	-1.02115	GGGGAGGATGAAAAGTGAAGGTCTGGTGTGGGGAATGTTGTCTGGCTCGAGGCCACCAATAGACTGAATGATGACGTTCAGTTTGAGAGAGTTTTCTCGGACCAGGCTTCATTCCCCTCACTATCTTCTCTTTCTCTATCATTTTCTCT	Contig1055	149	31	31	39	48	46.9799	-69.8	-46.8456	-0.997143	GGTTGAGGGGAATGCTGTCTGGTTCGAGACCATTTCTCAGAAGCAAAAACAGAGCATCTTTCAAATGATCTCGGACCAGGCTTCATTCCCCCCCAACT	Contig1270	122	34	25	21	42	37.7049	-52.5	-43.0328	-1.1413
	bpe-miR166a-3p.TTs.T1C.C2G.C	24	TTCGGGACCAGGCTTCATTCCCCC	TTTGAGGGGAATGTCGGCTGGCTCGAGGCTTTTTGGCTTTTGGCATGGGTGGTTTTCTCATGAAAAAAAGAACTCTTAAGGCTTCGGACCAGGCTTCATTCCCCTCAAA	Contig2096	109	23	22	30	34	47.7064	-53.1	-48.7156	-1.02115	GGGGAGGATGAAAAGTGAAGGTCTGGTGTGGGGAATGTTGTCTGGCTCGAGGCCACCAATAGACTGAATGATGACGTTCAGTTTGAGAGAGTTTTCTCGGACCAGGCTTCATTCCCCTCACTATCTTCTCTTTCTCTATCATTTTCTCT	Contig1055	149	31	31	39	48	46.9799	-69.8	-46.8456	-0.997143	GGTTGAGGGGAATGCTGTCTGGTTCGAGACCATTTCTCAGAAGCAAAAACAGAGCATCTTTCAAATGATCTCGGACCAGGCTTCATTCCCCCCCAACT	Contig1270	122	34	25	21	42	37.7049	-52.5	-43.0328	-1.1413
	bpe-miR166a-3p.GGs.CC	25	GGTCGGACCAGGCTTCATTCCCCCC	TTTGAGGGGAATGTCGGCTGGCTCGAGGCTTTTTGGCTTTTGGCATGGGTGGTTTTCTCATGAAAAAAAGAACTCTTAAGGCTTCGGACCAGGCTTCATTCCCCTCAAA	Contig2096	109	23	22	30	34	47.7064	-53.1	-48.7156	-1.02115	GGGGAGGATGAAAAGTGAAGGTCTGGTGTGGGGAATGTTGTCTGGCTCGAGGCCACCAATAGACTGAATGATGACGTTCAGTTTGAGAGAGTTTTCTCGGACCAGGCTTCATTCCCCTCACTATCTTCTCTTTCTCTATCATTTTCTCT	Contig1055	149	31	31	39	48	46.9799	-69.8	-46.8456	-0.997143	GGTTGAGGGGAATGCTGTCTGGTTCGAGACCATTTCTCAGAAGCAAAAACAGAGCATCTTTCAAATGATCTCGGACCAGGCTTCATTCCCCCCCAACT	Contig1270	122	34	25	21	42	37.7049	-52.5	-43.0328	-1.1413
	bpe-miR166a-3p.TCs.C20G.C.A	25	TCTCGGACCAGGCTTCATTCCGCCA	TTTGAGGGGAATGTCGGCTGGCTCGAGGCTTTTTGGCTTTTGGCATGGGTGGTTTTCTCATGAAAAAAAGAACTCTTAAGGCTTCGGACCAGGCTTCATTCCCCTCAAA	Contig2096	109	23	22	30	34	47.7064	-53.1	-48.7156	-1.02115	GGGGAGGATGAAAAGTGAAGGTCTGGTGTGGGGAATGTTGTCTGGCTCGAGGCCACCAATAGACTGAATGATGACGTTCAGTTTGAGAGAGTTTTCTCGGACCAGGCTTCATTCCCCTCACTATCTTCTCTTTCTCTATCATTTTCTCT	Contig1055	149	31	31	39	48	46.9799	-69.8	-46.8456	-0.997143	GGTTGAGGGGAATGCTGTCTGGTTCGAGACCATTTCTCAGAAGCAAAAACAGAGCATCTTTCAAATGATCTCGGACCAGGCTTCATTCCCCCCCAACT	Contig1270	122	34	25	21	42	37.7049	-52.5	-43.0328	-1.1413
	bpe-miR166a-3p.TCs.C19T.C21T	23	TCTCGGACCAGGCTTCATTCTCT	TTTGAGGGGAATGTCGGCTGGCTCGAGGCTTTTTGGCTTTTGGCATGGGTGGTTTTCTCATGAAAAAAAGAACTCTTAAGGCTTCGGACCAGGCTTCATTCCCCTCAAA	Contig2096	109	23	22	30	34	47.7064	-53.1	-48.7156	-1.02115	GGGGAGGATGAAAAGTGAAGGTCTGGTGTGGGGAATGTTGTCTGGCTCGAGGCCACCAATAGACTGAATGATGACGTTCAGTTTGAGAGAGTTTTCTCGGACCAGGCTTCATTCCCCTCACTATCTTCTCTTTCTCTATCATTTTCTCT	Contig1055	149	31	31	39	48	46.9799	-69.8	-46.8456	-0.997143	GGTTGAGGGGAATGCTGTCTGGTTCGAGACCATTTCTCAGAAGCAAAAACAGAGCATCTTTCAAATGATCTCGGACCAGGCTTCATTCCCCCCCAACT	Contig1270	122	34	25	21	42	37.7049	-52.5	-43.0328	-1.1413
	bpe-miR166a-3p.TCs.T16A.C18T	23	TCTCGGACCAGGCTTCAATTCCC	TTTGAGGGGAATGTCGGCTGGCTCGAGGCTTTTTGGCTTTTGGCATGGGTGGTTTTCTCATGAAAAAAAGAACTCTTAAGGCTTCGGACCAGGCTTCATTCCCCTCAAA	Contig2096	109	23	22	30	34	47.7064	-53.1	-48.7156	-1.02115	GGGGAGGATGAAAAGTGAAGGTCTGGTGTGGGGAATGTTGTCTGGCTCGAGGCCACCAATAGACTGAATGATGACGTTCAGTTTGAGAGAGTTTTCTCGGACCAGGCTTCATTCCCCTCACTATCTTCTCTTTCTCTATCATTTTCTCT	Contig1055	149	31	31	39	48	46.9799	-69.8	-46.8456	-0.997143	GGTTGAGGGGAATGCTGTCTGGTTCGAGACCATTTCTCAGAAGCAAAAACAGAGCATCTTTCAAATGATCTCGGACCAGGCTTCATTCCCCCCCAACT	Contig1270	122	34	25	21	42	37.7049	-52.5	-43.0328	-1.1413
	bpe-miR166a-3p.TCs.C19T.C21T.T	24	TCTCGGACCAGGCTTCATTCTCTT	TTTGAGGGGAATGTCGGCTGGCTCGAGGCTTTTTGGCTTTTGGCATGGGTGGTTTTCTCATGAAAAAAAGAACTCTTAAGGCTTCGGACCAGGCTTCATTCCCCTCAAA	Contig2096	109	23	22	30	34	47.7064	-53.1	-48.7156	-1.02115	GGGGAGGATGAAAAGTGAAGGTCTGGTGTGGGGAATGTTGTCTGGCTCGAGGCCACCAATAGACTGAATGATGACGTTCAGTTTGAGAGAGTTTTCTCGGACCAGGCTTCATTCCCCTCACTATCTTCTCTTTCTCTATCATTTTCTCT	Contig1055	149	31	31	39	48	46.9799	-69.8	-46.8456	-0.997143	GGTTGAGGGGAATGCTGTCTGGTTCGAGACCATTTCTCAGAAGCAAAAACAGAGCATCTTTCAAATGATCTCGGACCAGGCTTCATTCCCCCCCAACT	Contig1270	122	34	25	21	42	37.7049	-52.5	-43.0328	-1.1413
	bpe-miR166a-3p.Ts.T1G.T	23	TGCGGACCAGGCTTCATTCCCCT	TTTGAGGGGAATGTCGGCTGGCTCGAGGCTTTTTGGCTTTTGGCATGGGTGGTTTTCTCATGAAAAAAAGAACTCTTAAGGCTTCGGACCAGGCTTCATTCCCCTCAAA	Contig2096	109	23	22	30	34	47.7064	-53.1	-48.7156	-1.02115	GGGGAGGATGAAAAGTGAAGGTCTGGTGTGGGGAATGTTGTCTGGCTCGAGGCCACCAATAGACTGAATGATGACGTTCAGTTTGAGAGAGTTTTCTCGGACCAGGCTTCATTCCCCTCACTATCTTCTCTTTCTCTATCATTTTCTCT	Contig1055	149	31	31	39	48	46.9799	-69.8	-46.8456	-0.997143	GGTTGAGGGGAATGCTGTCTGGTTCGAGACCATTTCTCAGAAGCAAAAACAGAGCATCTTTCAAATGATCTCGGACCAGGCTTCATTCCCCCCCAACT	Contig1270	122	34	25	21	42	37.7049	-52.5	-43.0328	-1.1413
	bpe-miR166a-3p.Cs.G	23	CTCGGACCAGGCTTCATTCCCCG	TTTGAGGGGAATGTCGGCTGGCTCGAGGCTTTTTGGCTTTTGGCATGGGTGGTTTTCTCATGAAAAAAAGAACTCTTAAGGCTTCGGACCAGGCTTCATTCCCCTCAAA	Contig2096	109	23	22	30	34	47.7064	-53.1	-48.7156	-1.02115	GGGGAGGATGAAAAGTGAAGGTCTGGTGTGGGGAATGTTGTCTGGCTCGAGGCCACCAATAGACTGAATGATGACGTTCAGTTTGAGAGAGTTTTCTCGGACCAGGCTTCATTCCCCTCACTATCTTCTCTTTCTCTATCATTTTCTCT	Contig1055	149	31	31	39	48	46.9799	-69.8	-46.8456	-0.997143	GGTTGAGGGGAATGCTGTCTGGTTCGAGACCATTTCTCAGAAGCAAAAACAGAGCATCTTTCAAATGATCTCGGACCAGGCTTCATTCCCCCCCAACT	Contig1270	122	34	25	21	42	37.7049	-52.5	-43.0328	-1.1413
	bpe-miR166a-3p.Ts.G	23	TTCGGACCAGGCTTCATTCCCCG	TTTGAGGGGAATGTCGGCTGGCTCGAGGCTTTTTGGCTTTTGGCATGGGTGGTTTTCTCATGAAAAAAAGAACTCTTAAGGCTTCGGACCAGGCTTCATTCCCCTCAAA	Contig2096	109	23	22	30	34	47.7064	-53.1	-48.7156	-1.02115	GGGGAGGATGAAAAGTGAAGGTCTGGTGTGGGGAATGTTGTCTGGCTCGAGGCCACCAATAGACTGAATGATGACGTTCAGTTTGAGAGAGTTTTCTCGGACCAGGCTTCATTCCCCTCACTATCTTCTCTTTCTCTATCATTTTCTCT	Contig1055	149	31	31	39	48	46.9799	-69.8	-46.8456	-0.997143	GGTTGAGGGGAATGCTGTCTGGTTCGAGACCATTTCTCAGAAGCAAAAACAGAGCATCTTTCAAATGATCTCGGACCAGGCTTCATTCCCCCCCAACT	Contig1270	122	34	25	21	42	37.7049	-52.5	-43.0328	-1.1413
	bpe-miR166a-3p.Ts.C21G.A	23	TTCGGACCAGGCTTCATTCCCGA	TTTGAGGGGAATGTCGGCTGGCTCGAGGCTTTTTGGCTTTTGGCATGGGTGGTTTTCTCATGAAAAAAAGAACTCTTAAGGCTTCGGACCAGGCTTCATTCCCCTCAAA	Contig2096	109	23	22	30	34	47.7064	-53.1	-48.7156	-1.02115	GGGGAGGATGAAAAGTGAAGGTCTGGTGTGGGGAATGTTGTCTGGCTCGAGGCCACCAATAGACTGAATGATGACGTTCAGTTTGAGAGAGTTTTCTCGGACCAGGCTTCATTCCCCTCACTATCTTCTCTTTCTCTATCATTTTCTCT	Contig1055	149	31	31	39	48	46.9799	-69.8	-46.8456	-0.997143	GGTTGAGGGGAATGCTGTCTGGTTCGAGACCATTTCTCAGAAGCAAAAACAGAGCATCTTTCAAATGATCTCGGACCAGGCTTCATTCCCCCCCAACT	Contig1270	122	34	25	21	42	37.7049	-52.5	-43.0328	-1.1413
	bpe-miR166a-3p.Gs.TT	24	GTCGGACCAGGCTTCATTCCCCTT	TTTGAGGGGAATGTCGGCTGGCTCGAGGCTTTTTGGCTTTTGGCATGGGTGGTTTTCTCATGAAAAAAAGAACTCTTAAGGCTTCGGACCAGGCTTCATTCCCCTCAAA	Contig2096	109	23	22	30	34	47.7064	-53.1	-48.7156	-1.02115	GGGGAGGATGAAAAGTGAAGGTCTGGTGTGGGGAATGTTGTCTGGCTCGAGGCCACCAATAGACTGAATGATGACGTTCAGTTTGAGAGAGTTTTCTCGGACCAGGCTTCATTCCCCTCACTATCTTCTCTTTCTCTATCATTTTCTCT	Contig1055	149	31	31	39	48	46.9799	-69.8	-46.8456	-0.997143	GGTTGAGGGGAATGCTGTCTGGTTCGAGACCATTTCTCAGAAGCAAAAACAGAGCATCTTTCAAATGATCTCGGACCAGGCTTCATTCCCCCCCAACT	Contig1270	122	34	25	21	42	37.7049	-52.5	-43.0328	-1.1413
	bpe-miR166a-3p.Ts.C.G	24	TTCGGACCAGGCTTCATTCCCCCG	TTTGAGGGGAATGTCGGCTGGCTCGAGGCTTTTTGGCTTTTGGCATGGGTGGTTTTCTCATGAAAAAAAGAACTCTTAAGGCTTCGGACCAGGCTTCATTCCCCTCAAA	Contig2096	109	23	22	30	34	47.7064	-53.1	-48.7156	-1.02115	GGGGAGGATGAAAAGTGAAGGTCTGGTGTGGGGAATGTTGTCTGGCTCGAGGCCACCAATAGACTGAATGATGACGTTCAGTTTGAGAGAGTTTTCTCGGACCAGGCTTCATTCCCCTCACTATCTTCTCTTTCTCTATCATTTTCTCT	Contig1055	149	31	31	39	48	46.9799	-69.8	-46.8456	-0.997143	GGTTGAGGGGAATGCTGTCTGGTTCGAGACCATTTCTCAGAAGCAAAAACAGAGCATCTTTCAAATGATCTCGGACCAGGCTTCATTCCCCCCCAACT	Contig1270	122	34	25	21	42	37.7049	-52.5	-43.0328	-1.1413
	bpe-miR166a-3p.Ts.C21A	22	TTCGGACCAGGCTTCATTCCCA	TTTGAGGGGAATGTCGGCTGGCTCGAGGCTTTTTGGCTTTTGGCATGGGTGGTTTTCTCATGAAAAAAAGAACTCTTAAGGCTTCGGACCAGGCTTCATTCCCCTCAAA	Contig2096	109	23	22	30	34	47.7064	-53.1	-48.7156	-1.02115	GGGGAGGATGAAAAGTGAAGGTCTGGTGTGGGGAATGTTGTCTGGCTCGAGGCCACCAATAGACTGAATGATGACGTTCAGTTTGAGAGAGTTTTCTCGGACCAGGCTTCATTCCCCTCACTATCTTCTCTTTCTCTATCATTTTCTCT	Contig1055	149	31	31	39	48	46.9799	-69.8	-46.8456	-0.997143	GGTTGAGGGGAATGCTGTCTGGTTCGAGACCATTTCTCAGAAGCAAAAACAGAGCATCTTTCAAATGATCTCGGACCAGGCTTCATTCCCCCCCAACT	Contig1270	122	34	25	21	42	37.7049	-52.5	-43.0328	-1.1413
	bpe-miR166a-3p.Ts.T1A.cc	20	TACGGACCAGGCTTCATTCC	TTTGAGGGGAATGTCGGCTGGCTCGAGGCTTTTTGGCTTTTGGCATGGGTGGTTTTCTCATGAAAAAAAGAACTCTTAAGGCTTCGGACCAGGCTTCATTCCCCTCAAA	Contig2096	109	23	22	30	34	47.7064	-53.1	-48.7156	-1.02115	GGGGAGGATGAAAAGTGAAGGTCTGGTGTGGGGAATGTTGTCTGGCTCGAGGCCACCAATAGACTGAATGATGACGTTCAGTTTGAGAGAGTTTTCTCGGACCAGGCTTCATTCCCCTCACTATCTTCTCTTTCTCTATCATTTTCTCT	Contig1055	149	31	31	39	48	46.9799	-69.8	-46.8456	-0.997143	GGTTGAGGGGAATGCTGTCTGGTTCGAGACCATTTCTCAGAAGCAAAAACAGAGCATCTTTCAAATGATCTCGGACCAGGCTTCATTCCCCCCCAACT	Contig1270	122	34	25	21	42	37.7049	-52.5	-43.0328	-1.1413
	bpe-miR166a-3p.Ts.T1C.C2A.C	23	TCAGGACCAGGCTTCATTCCCCC	TTTGAGGGGAATGTCGGCTGGCTCGAGGCTTTTTGGCTTTTGGCATGGGTGGTTTTCTCATGAAAAAAAGAACTCTTAAGGCTTCGGACCAGGCTTCATTCCCCTCAAA	Contig2096	109	23	22	30	34	47.7064	-53.1	-48.7156	-1.02115	GGGGAGGATGAAAAGTGAAGGTCTGGTGTGGGGAATGTTGTCTGGCTCGAGGCCACCAATAGACTGAATGATGACGTTCAGTTTGAGAGAGTTTTCTCGGACCAGGCTTCATTCCCCTCACTATCTTCTCTTTCTCTATCATTTTCTCT	Contig1055	149	31	31	39	48	46.9799	-69.8	-46.8456	-0.997143	GGTTGAGGGGAATGCTGTCTGGTTCGAGACCATTTCTCAGAAGCAAAAACAGAGCATCTTTCAAATGATCTCGGACCAGGCTTCATTCCCCCCCAACT	Contig1270	122	34	25	21	42	37.7049	-52.5	-43.0328	-1.1413
	bpe-miR166a-3p.Ts.T	23	TTCGGACCAGGCTTCATTCCCCT	TTTGAGGGGAATGTCGGCTGGCTCGAGGCTTTTTGGCTTTTGGCATGGGTGGTTTTCTCATGAAAAAAAGAACTCTTAAGGCTTCGGACCAGGCTTCATTCCCCTCAAA	Contig2096	109	23	22	30	34	47.7064	-53.1	-48.7156	-1.02115	GGGGAGGATGAAAAGTGAAGGTCTGGTGTGGGGAATGTTGTCTGGCTCGAGGCCACCAATAGACTGAATGATGACGTTCAGTTTGAGAGAGTTTTCTCGGACCAGGCTTCATTCCCCTCACTATCTTCTCTTTCTCTATCATTTTCTCT	Contig1055	149	31	31	39	48	46.9799	-69.8	-46.8456	-0.997143	GGTTGAGGGGAATGCTGTCTGGTTCGAGACCATTTCTCAGAAGCAAAAACAGAGCATCTTTCAAATGATCTCGGACCAGGCTTCATTCCCCCCCAACT	Contig1270	122	34	25	21	42	37.7049	-52.5	-43.0328	-1.1413
	bpe-miR166a-3p.Gs.A8T.c	21	GTCGGACCTGGCTTCATTCCC	TTTGAGGGGAATGTCGGCTGGCTCGAGGCTTTTTGGCTTTTGGCATGGGTGGTTTTCTCATGAAAAAAAGAACTCTTAAGGCTTCGGACCAGGCTTCATTCCCCTCAAA	Contig2096	109	23	22	30	34	47.7064	-53.1	-48.7156	-1.02115	GGGGAGGATGAAAAGTGAAGGTCTGGTGTGGGGAATGTTGTCTGGCTCGAGGCCACCAATAGACTGAATGATGACGTTCAGTTTGAGAGAGTTTTCTCGGACCAGGCTTCATTCCCCTCACTATCTTCTCTTTCTCTATCATTTTCTCT	Contig1055	149	31	31	39	48	46.9799	-69.8	-46.8456	-0.997143	GGTTGAGGGGAATGCTGTCTGGTTCGAGACCATTTCTCAGAAGCAAAAACAGAGCATCTTTCAAATGATCTCGGACCAGGCTTCATTCCCCCCCAACT	Contig1270	122	34	25	21	42	37.7049	-52.5	-43.0328	-1.1413
	bpe-miR166a-3p.Ts.T1G.T16A	22	TGCGGACCAGGCTTCAATCCCC	TTTGAGGGGAATGTCGGCTGGCTCGAGGCTTTTTGGCTTTTGGCATGGGTGGTTTTCTCATGAAAAAAAGAACTCTTAAGGCTTCGGACCAGGCTTCATTCCCCTCAAA	Contig2096	109	23	22	30	34	47.7064	-53.1	-48.7156	-1.02115	GGGGAGGATGAAAAGTGAAGGTCTGGTGTGGGGAATGTTGTCTGGCTCGAGGCCACCAATAGACTGAATGATGACGTTCAGTTTGAGAGAGTTTTCTCGGACCAGGCTTCATTCCCCTCACTATCTTCTCTTTCTCTATCATTTTCTCT	Contig1055	149	31	31	39	48	46.9799	-69.8	-46.8456	-0.997143	GGTTGAGGGGAATGCTGTCTGGTTCGAGACCATTTCTCAGAAGCAAAAACAGAGCATCTTTCAAATGATCTCGGACCAGGCTTCATTCCCCCCCAACT	Contig1270	122	34	25	21	42	37.7049	-52.5	-43.0328	-1.1413
	bpe-miR166a-3p.Gs.GC	24	GTCGGACCAGGCTTCATTCCCCGC	TTTGAGGGGAATGTCGGCTGGCTCGAGGCTTTTTGGCTTTTGGCATGGGTGGTTTTCTCATGAAAAAAAGAACTCTTAAGGCTTCGGACCAGGCTTCATTCCCCTCAAA	Contig2096	109	23	22	30	34	47.7064	-53.1	-48.7156	-1.02115	GGGGAGGATGAAAAGTGAAGGTCTGGTGTGGGGAATGTTGTCTGGCTCGAGGCCACCAATAGACTGAATGATGACGTTCAGTTTGAGAGAGTTTTCTCGGACCAGGCTTCATTCCCCTCACTATCTTCTCTTTCTCTATCATTTTCTCT	Contig1055	149	31	31	39	48	46.9799	-69.8	-46.8456	-0.997143	GGTTGAGGGGAATGCTGTCTGGTTCGAGACCATTTCTCAGAAGCAAAAACAGAGCATCTTTCAAATGATCTCGGACCAGGCTTCATTCCCCCCCAACT	Contig1270	122	34	25	21	42	37.7049	-52.5	-43.0328	-1.1413
	bpe-miR166a-3p.Ts.T1A.A	23	TACGGACCAGGCTTCATTCCCCA	TTTGAGGGGAATGTCGGCTGGCTCGAGGCTTTTTGGCTTTTGGCATGGGTGGTTTTCTCATGAAAAAAAGAACTCTTAAGGCTTCGGACCAGGCTTCATTCCCCTCAAA	Contig2096	109	23	22	30	34	47.7064	-53.1	-48.7156	-1.02115	GGGGAGGATGAAAAGTGAAGGTCTGGTGTGGGGAATGTTGTCTGGCTCGAGGCCACCAATAGACTGAATGATGACGTTCAGTTTGAGAGAGTTTTCTCGGACCAGGCTTCATTCCCCTCACTATCTTCTCTTTCTCTATCATTTTCTCT	Contig1055	149	31	31	39	48	46.9799	-69.8	-46.8456	-0.997143	GGTTGAGGGGAATGCTGTCTGGTTCGAGACCATTTCTCAGAAGCAAAAACAGAGCATCTTTCAAATGATCTCGGACCAGGCTTCATTCCCCCCCAACT	Contig1270	122	34	25	21	42	37.7049	-52.5	-43.0328	-1.1413
	bpe-miR166a-3p.Gs.C7T.C21G	22	GTCGGACTAGGCTTCATTCCCG	TTTGAGGGGAATGTCGGCTGGCTCGAGGCTTTTTGGCTTTTGGCATGGGTGGTTTTCTCATGAAAAAAAGAACTCTTAAGGCTTCGGACCAGGCTTCATTCCCCTCAAA	Contig2096	109	23	22	30	34	47.7064	-53.1	-48.7156	-1.02115	GGGGAGGATGAAAAGTGAAGGTCTGGTGTGGGGAATGTTGTCTGGCTCGAGGCCACCAATAGACTGAATGATGACGTTCAGTTTGAGAGAGTTTTCTCGGACCAGGCTTCATTCCCCTCACTATCTTCTCTTTCTCTATCATTTTCTCT	Contig1055	149	31	31	39	48	46.9799	-69.8	-46.8456	-0.997143	GGTTGAGGGGAATGCTGTCTGGTTCGAGACCATTTCTCAGAAGCAAAAACAGAGCATCTTTCAAATGATCTCGGACCAGGCTTCATTCCCCCCCAACT	Contig1270	122	34	25	21	42	37.7049	-52.5	-43.0328	-1.1413
	bpe-miR166a-3p.Gs.T	23	GTCGGACCAGGCTTCATTCCCCT	TTTGAGGGGAATGTCGGCTGGCTCGAGGCTTTTTGGCTTTTGGCATGGGTGGTTTTCTCATGAAAAAAAGAACTCTTAAGGCTTCGGACCAGGCTTCATTCCCCTCAAA	Contig2096	109	23	22	30	34	47.7064	-53.1	-48.7156	-1.02115	GGGGAGGATGAAAAGTGAAGGTCTGGTGTGGGGAATGTTGTCTGGCTCGAGGCCACCAATAGACTGAATGATGACGTTCAGTTTGAGAGAGTTTTCTCGGACCAGGCTTCATTCCCCTCACTATCTTCTCTTTCTCTATCATTTTCTCT	Contig1055	149	31	31	39	48	46.9799	-69.8	-46.8456	-0.997143	GGTTGAGGGGAATGCTGTCTGGTTCGAGACCATTTCTCAGAAGCAAAAACAGAGCATCTTTCAAATGATCTCGGACCAGGCTTCATTCCCCCCCAACT	Contig1270	122	34	25	21	42	37.7049	-52.5	-43.0328	-1.1413
	bpe-miR166a-3p.As.GC	24	ATCGGACCAGGCTTCATTCCCCGC	TTTGAGGGGAATGTCGGCTGGCTCGAGGCTTTTTGGCTTTTGGCATGGGTGGTTTTCTCATGAAAAAAAGAACTCTTAAGGCTTCGGACCAGGCTTCATTCCCCTCAAA	Contig2096	109	23	22	30	34	47.7064	-53.1	-48.7156	-1.02115	GGGGAGGATGAAAAGTGAAGGTCTGGTGTGGGGAATGTTGTCTGGCTCGAGGCCACCAATAGACTGAATGATGACGTTCAGTTTGAGAGAGTTTTCTCGGACCAGGCTTCATTCCCCTCACTATCTTCTCTTTCTCTATCATTTTCTCT	Contig1055	149	31	31	39	48	46.9799	-69.8	-46.8456	-0.997143	GGTTGAGGGGAATGCTGTCTGGTTCGAGACCATTTCTCAGAAGCAAAAACAGAGCATCTTTCAAATGATCTCGGACCAGGCTTCATTCCCCCCCAACT	Contig1270	122	34	25	21	42	37.7049	-52.5	-43.0328	-1.1413
	bpe-miR166a-3p.T1A	21	ACGGACCAGGCTTCATTCCCC	TTTGAGGGGAATGTCGGCTGGCTCGAGGCTTTTTGGCTTTTGGCATGGGTGGTTTTCTCATGAAAAAAAGAACTCTTAAGGCTTCGGACCAGGCTTCATTCCCCTCAAA	Contig2096	109	23	22	30	34	47.7064	-53.1	-48.7156	-1.02115	GGGGAGGATGAAAAGTGAAGGTCTGGTGTGGGGAATGTTGTCTGGCTCGAGGCCACCAATAGACTGAATGATGACGTTCAGTTTGAGAGAGTTTTCTCGGACCAGGCTTCATTCCCCTCACTATCTTCTCTTTCTCTATCATTTTCTCT	Contig1055	149	31	31	39	48	46.9799	-69.8	-46.8456	-0.997143	GGTTGAGGGGAATGCTGTCTGGTTCGAGACCATTTCTCAGAAGCAAAAACAGAGCATCTTTCAAATGATCTCGGACCAGGCTTCATTCCCCCCCAACT	Contig1270	122	34	25	21	42	37.7049	-52.5	-43.0328	-1.1413
	bpe-miR166a-3p.C21A.T	22	TCGGACCAGGCTTCATTCCCAT	TTTGAGGGGAATGTCGGCTGGCTCGAGGCTTTTTGGCTTTTGGCATGGGTGGTTTTCTCATGAAAAAAAGAACTCTTAAGGCTTCGGACCAGGCTTCATTCCCCTCAAA	Contig2096	109	23	22	30	34	47.7064	-53.1	-48.7156	-1.02115	GGGGAGGATGAAAAGTGAAGGTCTGGTGTGGGGAATGTTGTCTGGCTCGAGGCCACCAATAGACTGAATGATGACGTTCAGTTTGAGAGAGTTTTCTCGGACCAGGCTTCATTCCCCTCACTATCTTCTCTTTCTCTATCATTTTCTCT	Contig1055	149	31	31	39	48	46.9799	-69.8	-46.8456	-0.997143	GGTTGAGGGGAATGCTGTCTGGTTCGAGACCATTTCTCAGAAGCAAAAACAGAGCATCTTTCAAATGATCTCGGACCAGGCTTCATTCCCCCCCAACT	Contig1270	122	34	25	21	42	37.7049	-52.5	-43.0328	-1.1413
	bpe-miR166a-3p.G10A	21	TCGGACCAGACTTCATTCCCC	TTTGAGGGGAATGTCGGCTGGCTCGAGGCTTTTTGGCTTTTGGCATGGGTGGTTTTCTCATGAAAAAAAGAACTCTTAAGGCTTCGGACCAGGCTTCATTCCCCTCAAA	Contig2096	109	23	22	30	34	47.7064	-53.1	-48.7156	-1.02115	GGGGAGGATGAAAAGTGAAGGTCTGGTGTGGGGAATGTTGTCTGGCTCGAGGCCACCAATAGACTGAATGATGACGTTCAGTTTGAGAGAGTTTTCTCGGACCAGGCTTCATTCCCCTCACTATCTTCTCTTTCTCTATCATTTTCTCT	Contig1055	149	31	31	39	48	46.9799	-69.8	-46.8456	-0.997143	GGTTGAGGGGAATGCTGTCTGGTTCGAGACCATTTCTCAGAAGCAAAAACAGAGCATCTTTCAAATGATCTCGGACCAGGCTTCATTCCCCCCCAACT	Contig1270	122	34	25	21	42	37.7049	-52.5	-43.0328	-1.1413
	bpe-miR166a-3p.T12C	21	TCGGACCAGGCCTCATTCCCC	TTTGAGGGGAATGTCGGCTGGCTCGAGGCTTTTTGGCTTTTGGCATGGGTGGTTTTCTCATGAAAAAAAGAACTCTTAAGGCTTCGGACCAGGCTTCATTCCCCTCAAA	Contig2096	109	23	22	30	34	47.7064	-53.1	-48.7156	-1.02115	GGGGAGGATGAAAAGTGAAGGTCTGGTGTGGGGAATGTTGTCTGGCTCGAGGCCACCAATAGACTGAATGATGACGTTCAGTTTGAGAGAGTTTTCTCGGACCAGGCTTCATTCCCCTCACTATCTTCTCTTTCTCTATCATTTTCTCT	Contig1055	149	31	31	39	48	46.9799	-69.8	-46.8456	-0.997143	GGTTGAGGGGAATGCTGTCTGGTTCGAGACCATTTCTCAGAAGCAAAAACAGAGCATCTTTCAAATGATCTCGGACCAGGCTTCATTCCCCCCCAACT	Contig1270	122	34	25	21	42	37.7049	-52.5	-43.0328	-1.1413
	bpe-miR166a-3p.C21T.C.T	23	TCGGACCAGGCTTCATTCCCTCT	TTTGAGGGGAATGTCGGCTGGCTCGAGGCTTTTTGGCTTTTGGCATGGGTGGTTTTCTCATGAAAAAAAGAACTCTTAAGGCTTCGGACCAGGCTTCATTCCCCTCAAA	Contig2096	109	23	22	30	34	47.7064	-53.1	-48.7156	-1.02115	GGGGAGGATGAAAAGTGAAGGTCTGGTGTGGGGAATGTTGTCTGGCTCGAGGCCACCAATAGACTGAATGATGACGTTCAGTTTGAGAGAGTTTTCTCGGACCAGGCTTCATTCCCCTCACTATCTTCTCTTTCTCTATCATTTTCTCT	Contig1055	149	31	31	39	48	46.9799	-69.8	-46.8456	-0.997143	GGTTGAGGGGAATGCTGTCTGGTTCGAGACCATTTCTCAGAAGCAAAAACAGAGCATCTTTCAAATGATCTCGGACCAGGCTTCATTCCCCCCCAACT	Contig1270	122	34	25	21	42	37.7049	-52.5	-43.0328	-1.1413
	bpe-miR166a-3p.T12G	21	TCGGACCAGGCGTCATTCCCC	TTTGAGGGGAATGTCGGCTGGCTCGAGGCTTTTTGGCTTTTGGCATGGGTGGTTTTCTCATGAAAAAAAGAACTCTTAAGGCTTCGGACCAGGCTTCATTCCCCTCAAA	Contig2096	109	23	22	30	34	47.7064	-53.1	-48.7156	-1.02115	GGGGAGGATGAAAAGTGAAGGTCTGGTGTGGGGAATGTTGTCTGGCTCGAGGCCACCAATAGACTGAATGATGACGTTCAGTTTGAGAGAGTTTTCTCGGACCAGGCTTCATTCCCCTCACTATCTTCTCTTTCTCTATCATTTTCTCT	Contig1055	149	31	31	39	48	46.9799	-69.8	-46.8456	-0.997143	GGTTGAGGGGAATGCTGTCTGGTTCGAGACCATTTCTCAGAAGCAAAAACAGAGCATCTTTCAAATGATCTCGGACCAGGCTTCATTCCCCCCCAACT	Contig1270	122	34	25	21	42	37.7049	-52.5	-43.0328	-1.1413
	bpe-miR166a-3p.G9A	21	TCGGACCAAGCTTCATTCCCC	TTTGAGGGGAATGTCGGCTGGCTCGAGGCTTTTTGGCTTTTGGCATGGGTGGTTTTCTCATGAAAAAAAGAACTCTTAAGGCTTCGGACCAGGCTTCATTCCCCTCAAA	Contig2096	109	23	22	30	34	47.7064	-53.1	-48.7156	-1.02115	GGGGAGGATGAAAAGTGAAGGTCTGGTGTGGGGAATGTTGTCTGGCTCGAGGCCACCAATAGACTGAATGATGACGTTCAGTTTGAGAGAGTTTTCTCGGACCAGGCTTCATTCCCCTCACTATCTTCTCTTTCTCTATCATTTTCTCT	Contig1055	149	31	31	39	48	46.9799	-69.8	-46.8456	-0.997143	GGTTGAGGGGAATGCTGTCTGGTTCGAGACCATTTCTCAGAAGCAAAAACAGAGCATCTTTCAAATGATCTCGGACCAGGCTTCATTCCCCCCCAACT	Contig1270	122	34	25	21	42	37.7049	-52.5	-43.0328	-1.1413
	bpe-miR166a-3p.T13C	21	TCGGACCAGGCTCCATTCCCC	TTTGAGGGGAATGTCGGCTGGCTCGAGGCTTTTTGGCTTTTGGCATGGGTGGTTTTCTCATGAAAAAAAGAACTCTTAAGGCTTCGGACCAGGCTTCATTCCCCTCAAA	Contig2096	109	23	22	30	34	47.7064	-53.1	-48.7156	-1.02115	GGGGAGGATGAAAAGTGAAGGTCTGGTGTGGGGAATGTTGTCTGGCTCGAGGCCACCAATAGACTGAATGATGACGTTCAGTTTGAGAGAGTTTTCTCGGACCAGGCTTCATTCCCCTCACTATCTTCTCTTTCTCTATCATTTTCTCT	Contig1055	149	31	31	39	48	46.9799	-69.8	-46.8456	-0.997143	GGTTGAGGGGAATGCTGTCTGGTTCGAGACCATTTCTCAGAAGCAAAAACAGAGCATCTTTCAAATGATCTCGGACCAGGCTTCATTCCCCCCCAACT	Contig1270	122	34	25	21	42	37.7049	-52.5	-43.0328	-1.1413
	bpe-miR166a-3p.G9T	21	TCGGACCATGCTTCATTCCCC	TTTGAGGGGAATGTCGGCTGGCTCGAGGCTTTTTGGCTTTTGGCATGGGTGGTTTTCTCATGAAAAAAAGAACTCTTAAGGCTTCGGACCAGGCTTCATTCCCCTCAAA	Contig2096	109	23	22	30	34	47.7064	-53.1	-48.7156	-1.02115	GGGGAGGATGAAAAGTGAAGGTCTGGTGTGGGGAATGTTGTCTGGCTCGAGGCCACCAATAGACTGAATGATGACGTTCAGTTTGAGAGAGTTTTCTCGGACCAGGCTTCATTCCCCTCACTATCTTCTCTTTCTCTATCATTTTCTCT	Contig1055	149	31	31	39	48	46.9799	-69.8	-46.8456	-0.997143	GGTTGAGGGGAATGCTGTCTGGTTCGAGACCATTTCTCAGAAGCAAAAACAGAGCATCTTTCAAATGATCTCGGACCAGGCTTCATTCCCCCCCAACT	Contig1270	122	34	25	21	42	37.7049	-52.5	-43.0328	-1.1413
	bpe-miR166a-3p.A15C.T16A	21	TCGGACCAGGCTTCCATCCCC	TTTGAGGGGAATGTCGGCTGGCTCGAGGCTTTTTGGCTTTTGGCATGGGTGGTTTTCTCATGAAAAAAAGAACTCTTAAGGCTTCGGACCAGGCTTCATTCCCCTCAAA	Contig2096	109	23	22	30	34	47.7064	-53.1	-48.7156	-1.02115	GGGGAGGATGAAAAGTGAAGGTCTGGTGTGGGGAATGTTGTCTGGCTCGAGGCCACCAATAGACTGAATGATGACGTTCAGTTTGAGAGAGTTTTCTCGGACCAGGCTTCATTCCCCTCACTATCTTCTCTTTCTCTATCATTTTCTCT	Contig1055	149	31	31	39	48	46.9799	-69.8	-46.8456	-0.997143	GGTTGAGGGGAATGCTGTCTGGTTCGAGACCATTTCTCAGAAGCAAAAACAGAGCATCTTTCAAATGATCTCGGACCAGGCTTCATTCCCCCCCAACT	Contig1270	122	34	25	21	42	37.7049	-52.5	-43.0328	-1.1413
	bpe-miR166a-3p.G9T.C	22	TCGGACCATGCTTCATTCCCCC	TTTGAGGGGAATGTCGGCTGGCTCGAGGCTTTTTGGCTTTTGGCATGGGTGGTTTTCTCATGAAAAAAAGAACTCTTAAGGCTTCGGACCAGGCTTCATTCCCCTCAAA	Contig2096	109	23	22	30	34	47.7064	-53.1	-48.7156	-1.02115	GGGGAGGATGAAAAGTGAAGGTCTGGTGTGGGGAATGTTGTCTGGCTCGAGGCCACCAATAGACTGAATGATGACGTTCAGTTTGAGAGAGTTTTCTCGGACCAGGCTTCATTCCCCTCACTATCTTCTCTTTCTCTATCATTTTCTCT	Contig1055	149	31	31	39	48	46.9799	-69.8	-46.8456	-0.997143	GGTTGAGGGGAATGCTGTCTGGTTCGAGACCATTTCTCAGAAGCAAAAACAGAGCATCTTTCAAATGATCTCGGACCAGGCTTCATTCCCCCCCAACT	Contig1270	122	34	25	21	42	37.7049	-52.5	-43.0328	-1.1413
	bpe-miR166a-3p.T17A	21	TCGGACCAGGCTTCATACCCC	TTTGAGGGGAATGTCGGCTGGCTCGAGGCTTTTTGGCTTTTGGCATGGGTGGTTTTCTCATGAAAAAAAGAACTCTTAAGGCTTCGGACCAGGCTTCATTCCCCTCAAA	Contig2096	109	23	22	30	34	47.7064	-53.1	-48.7156	-1.02115	GGGGAGGATGAAAAGTGAAGGTCTGGTGTGGGGAATGTTGTCTGGCTCGAGGCCACCAATAGACTGAATGATGACGTTCAGTTTGAGAGAGTTTTCTCGGACCAGGCTTCATTCCCCTCACTATCTTCTCTTTCTCTATCATTTTCTCT	Contig1055	149	31	31	39	48	46.9799	-69.8	-46.8456	-0.997143	GGTTGAGGGGAATGCTGTCTGGTTCGAGACCATTTCTCAGAAGCAAAAACAGAGCATCTTTCAAATGATCTCGGACCAGGCTTCATTCCCCCCCAACT	Contig1270	122	34	25	21	42	37.7049	-52.5	-43.0328	-1.1413
	bpe-miR166a-3p.C21T.C	22	TCGGACCAGGCTTCATTCCCTC	TTTGAGGGGAATGTCGGCTGGCTCGAGGCTTTTTGGCTTTTGGCATGGGTGGTTTTCTCATGAAAAAAAGAACTCTTAAGGCTTCGGACCAGGCTTCATTCCCCTCAAA	Contig2096	109	23	22	30	34	47.7064	-53.1	-48.7156	-1.02115	GGGGAGGATGAAAAGTGAAGGTCTGGTGTGGGGAATGTTGTCTGGCTCGAGGCCACCAATAGACTGAATGATGACGTTCAGTTTGAGAGAGTTTTCTCGGACCAGGCTTCATTCCCCTCACTATCTTCTCTTTCTCTATCATTTTCTCT	Contig1055	149	31	31	39	48	46.9799	-69.8	-46.8456	-0.997143	GGTTGAGGGGAATGCTGTCTGGTTCGAGACCATTTCTCAGAAGCAAAAACAGAGCATCTTTCAAATGATCTCGGACCAGGCTTCATTCCCCCCCAACT	Contig1270	122	34	25	21	42	37.7049	-52.5	-43.0328	-1.1413
	bpe-miR166a-3p.T16G.C18T.C	22	TCGGACCAGGCTTCAGTTCCCC	TTTGAGGGGAATGTCGGCTGGCTCGAGGCTTTTTGGCTTTTGGCATGGGTGGTTTTCTCATGAAAAAAAGAACTCTTAAGGCTTCGGACCAGGCTTCATTCCCCTCAAA	Contig2096	109	23	22	30	34	47.7064	-53.1	-48.7156	-1.02115	GGGGAGGATGAAAAGTGAAGGTCTGGTGTGGGGAATGTTGTCTGGCTCGAGGCCACCAATAGACTGAATGATGACGTTCAGTTTGAGAGAGTTTTCTCGGACCAGGCTTCATTCCCCTCACTATCTTCTCTTTCTCTATCATTTTCTCT	Contig1055	149	31	31	39	48	46.9799	-69.8	-46.8456	-0.997143	GGTTGAGGGGAATGCTGTCTGGTTCGAGACCATTTCTCAGAAGCAAAAACAGAGCATCTTTCAAATGATCTCGGACCAGGCTTCATTCCCCCCCAACT	Contig1270	122	34	25	21	42	37.7049	-52.5	-43.0328	-1.1413
	bpe-miR166a-3p.T12A	21	TCGGACCAGGCATCATTCCCC	TTTGAGGGGAATGTCGGCTGGCTCGAGGCTTTTTGGCTTTTGGCATGGGTGGTTTTCTCATGAAAAAAAGAACTCTTAAGGCTTCGGACCAGGCTTCATTCCCCTCAAA	Contig2096	109	23	22	30	34	47.7064	-53.1	-48.7156	-1.02115	GGGGAGGATGAAAAGTGAAGGTCTGGTGTGGGGAATGTTGTCTGGCTCGAGGCCACCAATAGACTGAATGATGACGTTCAGTTTGAGAGAGTTTTCTCGGACCAGGCTTCATTCCCCTCACTATCTTCTCTTTCTCTATCATTTTCTCT	Contig1055	149	31	31	39	48	46.9799	-69.8	-46.8456	-0.997143	GGTTGAGGGGAATGCTGTCTGGTTCGAGACCATTTCTCAGAAGCAAAAACAGAGCATCTTTCAAATGATCTCGGACCAGGCTTCATTCCCCCCCAACT	Contig1270	122	34	25	21	42	37.7049	-52.5	-43.0328	-1.1413
	bpe-miR166a-3p.A5G	21	TCGGGCCAGGCTTCATTCCCC	TTTGAGGGGAATGTCGGCTGGCTCGAGGCTTTTTGGCTTTTGGCATGGGTGGTTTTCTCATGAAAAAAAGAACTCTTAAGGCTTCGGACCAGGCTTCATTCCCCTCAAA	Contig2096	109	23	22	30	34	47.7064	-53.1	-48.7156	-1.02115	GGGGAGGATGAAAAGTGAAGGTCTGGTGTGGGGAATGTTGTCTGGCTCGAGGCCACCAATAGACTGAATGATGACGTTCAGTTTGAGAGAGTTTTCTCGGACCAGGCTTCATTCCCCTCACTATCTTCTCTTTCTCTATCATTTTCTCT	Contig1055	149	31	31	39	48	46.9799	-69.8	-46.8456	-0.997143	GGTTGAGGGGAATGCTGTCTGGTTCGAGACCATTTCTCAGAAGCAAAAACAGAGCATCTTTCAAATGATCTCGGACCAGGCTTCATTCCCCCCCAACT	Contig1270	122	34	25	21	42	37.7049	-52.5	-43.0328	-1.1413
	bpe-miR166a-3p.C11A	21	TCGGACCAGGATTCATTCCCC	TTTGAGGGGAATGTCGGCTGGCTCGAGGCTTTTTGGCTTTTGGCATGGGTGGTTTTCTCATGAAAAAAAGAACTCTTAAGGCTTCGGACCAGGCTTCATTCCCCTCAAA	Contig2096	109	23	22	30	34	47.7064	-53.1	-48.7156	-1.02115	GGGGAGGATGAAAAGTGAAGGTCTGGTGTGGGGAATGTTGTCTGGCTCGAGGCCACCAATAGACTGAATGATGACGTTCAGTTTGAGAGAGTTTTCTCGGACCAGGCTTCATTCCCCTCACTATCTTCTCTTTCTCTATCATTTTCTCT	Contig1055	149	31	31	39	48	46.9799	-69.8	-46.8456	-0.997143	GGTTGAGGGGAATGCTGTCTGGTTCGAGACCATTTCTCAGAAGCAAAAACAGAGCATCTTTCAAATGATCTCGGACCAGGCTTCATTCCCCCCCAACT	Contig1270	122	34	25	21	42	37.7049	-52.5	-43.0328	-1.1413
	bpe-miR166a-3p.C19T	21	TCGGACCAGGCTTCATTCTCC	TTTGAGGGGAATGTCGGCTGGCTCGAGGCTTTTTGGCTTTTGGCATGGGTGGTTTTCTCATGAAAAAAAGAACTCTTAAGGCTTCGGACCAGGCTTCATTCCCCTCAAA	Contig2096	109	23	22	30	34	47.7064	-53.1	-48.7156	-1.02115	GGGGAGGATGAAAAGTGAAGGTCTGGTGTGGGGAATGTTGTCTGGCTCGAGGCCACCAATAGACTGAATGATGACGTTCAGTTTGAGAGAGTTTTCTCGGACCAGGCTTCATTCCCCTCACTATCTTCTCTTTCTCTATCATTTTCTCT	Contig1055	149	31	31	39	48	46.9799	-69.8	-46.8456	-0.997143	GGTTGAGGGGAATGCTGTCTGGTTCGAGACCATTTCTCAGAAGCAAAAACAGAGCATCTTTCAAATGATCTCGGACCAGGCTTCATTCCCCCCCAACT	Contig1270	122	34	25	21	42	37.7049	-52.5	-43.0328	-1.1413
	bpe-miR166a-3p.C7G	21	TCGGACGAGGCTTCATTCCCC	TTTGAGGGGAATGTCGGCTGGCTCGAGGCTTTTTGGCTTTTGGCATGGGTGGTTTTCTCATGAAAAAAAGAACTCTTAAGGCTTCGGACCAGGCTTCATTCCCCTCAAA	Contig2096	109	23	22	30	34	47.7064	-53.1	-48.7156	-1.02115	GGGGAGGATGAAAAGTGAAGGTCTGGTGTGGGGAATGTTGTCTGGCTCGAGGCCACCAATAGACTGAATGATGACGTTCAGTTTGAGAGAGTTTTCTCGGACCAGGCTTCATTCCCCTCACTATCTTCTCTTTCTCTATCATTTTCTCT	Contig1055	149	31	31	39	48	46.9799	-69.8	-46.8456	-0.997143	GGTTGAGGGGAATGCTGTCTGGTTCGAGACCATTTCTCAGAAGCAAAAACAGAGCATCTTTCAAATGATCTCGGACCAGGCTTCATTCCCCCCCAACT	Contig1270	122	34	25	21	42	37.7049	-52.5	-43.0328	-1.1413
	bpe-miR166a-3p.AA	23	TCGGACCAGGCTTCATTCCCCAA	TTTGAGGGGAATGTCGGCTGGCTCGAGGCTTTTTGGCTTTTGGCATGGGTGGTTTTCTCATGAAAAAAAGAACTCTTAAGGCTTCGGACCAGGCTTCATTCCCCTCAAA	Contig2096	109	23	22	30	34	47.7064	-53.1	-48.7156	-1.02115	GGGGAGGATGAAAAGTGAAGGTCTGGTGTGGGGAATGTTGTCTGGCTCGAGGCCACCAATAGACTGAATGATGACGTTCAGTTTGAGAGAGTTTTCTCGGACCAGGCTTCATTCCCCTCACTATCTTCTCTTTCTCTATCATTTTCTCT	Contig1055	149	31	31	39	48	46.9799	-69.8	-46.8456	-0.997143	GGTTGAGGGGAATGCTGTCTGGTTCGAGACCATTTCTCAGAAGCAAAAACAGAGCATCTTTCAAATGATCTCGGACCAGGCTTCATTCCCCCCCAACT	Contig1270	122	34	25	21	42	37.7049	-52.5	-43.0328	-1.1413
	bpe-miR166a-3p.T16A.G	22	TCGGACCAGGCTTCAATCCCCG	TTTGAGGGGAATGTCGGCTGGCTCGAGGCTTTTTGGCTTTTGGCATGGGTGGTTTTCTCATGAAAAAAAGAACTCTTAAGGCTTCGGACCAGGCTTCATTCCCCTCAAA	Contig2096	109	23	22	30	34	47.7064	-53.1	-48.7156	-1.02115	GGGGAGGATGAAAAGTGAAGGTCTGGTGTGGGGAATGTTGTCTGGCTCGAGGCCACCAATAGACTGAATGATGACGTTCAGTTTGAGAGAGTTTTCTCGGACCAGGCTTCATTCCCCTCACTATCTTCTCTTTCTCTATCATTTTCTCT	Contig1055	149	31	31	39	48	46.9799	-69.8	-46.8456	-0.997143	GGTTGAGGGGAATGCTGTCTGGTTCGAGACCATTTCTCAGAAGCAAAAACAGAGCATCTTTCAAATGATCTCGGACCAGGCTTCATTCCCCCCCAACT	Contig1270	122	34	25	21	42	37.7049	-52.5	-43.0328	-1.1413
	bpe-miR166a-3p.C11G	21	TCGGACCAGGGTTCATTCCCC	TTTGAGGGGAATGTCGGCTGGCTCGAGGCTTTTTGGCTTTTGGCATGGGTGGTTTTCTCATGAAAAAAAGAACTCTTAAGGCTTCGGACCAGGCTTCATTCCCCTCAAA	Contig2096	109	23	22	30	34	47.7064	-53.1	-48.7156	-1.02115	GGGGAGGATGAAAAGTGAAGGTCTGGTGTGGGGAATGTTGTCTGGCTCGAGGCCACCAATAGACTGAATGATGACGTTCAGTTTGAGAGAGTTTTCTCGGACCAGGCTTCATTCCCCTCACTATCTTCTCTTTCTCTATCATTTTCTCT	Contig1055	149	31	31	39	48	46.9799	-69.8	-46.8456	-0.997143	GGTTGAGGGGAATGCTGTCTGGTTCGAGACCATTTCTCAGAAGCAAAAACAGAGCATCTTTCAAATGATCTCGGACCAGGCTTCATTCCCCCCCAACT	Contig1270	122	34	25	21	42	37.7049	-52.5	-43.0328	-1.1413
	bpe-miR166a-3p.TA	23	TCGGACCAGGCTTCATTCCCCTA	TTTGAGGGGAATGTCGGCTGGCTCGAGGCTTTTTGGCTTTTGGCATGGGTGGTTTTCTCATGAAAAAAAGAACTCTTAAGGCTTCGGACCAGGCTTCATTCCCCTCAAA	Contig2096	109	23	22	30	34	47.7064	-53.1	-48.7156	-1.02115	GGGGAGGATGAAAAGTGAAGGTCTGGTGTGGGGAATGTTGTCTGGCTCGAGGCCACCAATAGACTGAATGATGACGTTCAGTTTGAGAGAGTTTTCTCGGACCAGGCTTCATTCCCCTCACTATCTTCTCTTTCTCTATCATTTTCTCT	Contig1055	149	31	31	39	48	46.9799	-69.8	-46.8456	-0.997143	GGTTGAGGGGAATGCTGTCTGGTTCGAGACCATTTCTCAGAAGCAAAAACAGAGCATCTTTCAAATGATCTCGGACCAGGCTTCATTCCCCCCCAACT	Contig1270	122	34	25	21	42	37.7049	-52.5	-43.0328	-1.1413
	bpe-miR166a-3p.C21A.A	22	TCGGACCAGGCTTCATTCCCAA	TTTGAGGGGAATGTCGGCTGGCTCGAGGCTTTTTGGCTTTTGGCATGGGTGGTTTTCTCATGAAAAAAAGAACTCTTAAGGCTTCGGACCAGGCTTCATTCCCCTCAAA	Contig2096	109	23	22	30	34	47.7064	-53.1	-48.7156	-1.02115	GGGGAGGATGAAAAGTGAAGGTCTGGTGTGGGGAATGTTGTCTGGCTCGAGGCCACCAATAGACTGAATGATGACGTTCAGTTTGAGAGAGTTTTCTCGGACCAGGCTTCATTCCCCTCACTATCTTCTCTTTCTCTATCATTTTCTCT	Contig1055	149	31	31	39	48	46.9799	-69.8	-46.8456	-0.997143	GGTTGAGGGGAATGCTGTCTGGTTCGAGACCATTTCTCAGAAGCAAAAACAGAGCATCTTTCAAATGATCTCGGACCAGGCTTCATTCCCCCCCAACT	Contig1270	122	34	25	21	42	37.7049	-52.5	-43.0328	-1.1413
	bpe-miR166a-3p.tcs.C16G.C	20	GGACCAGGCTTCATTGCCCC	TTTGAGGGGAATGTCGGCTGGCTCGAGGCTTTTTGGCTTTTGGCATGGGTGGTTTTCTCATGAAAAAAAGAACTCTTAAGGCTTCGGACCAGGCTTCATTCCCCTCAAA	Contig2096	109	23	22	30	34	47.7064	-53.1	-48.7156	-1.02115	GGGGAGGATGAAAAGTGAAGGTCTGGTGTGGGGAATGTTGTCTGGCTCGAGGCCACCAATAGACTGAATGATGACGTTCAGTTTGAGAGAGTTTTCTCGGACCAGGCTTCATTCCCCTCACTATCTTCTCTTTCTCTATCATTTTCTCT	Contig1055	149	31	31	39	48	46.9799	-69.8	-46.8456	-0.997143	GGTTGAGGGGAATGCTGTCTGGTTCGAGACCATTTCTCAGAAGCAAAAACAGAGCATCTTTCAAATGATCTCGGACCAGGCTTCATTCCCCCCCAACT	Contig1270	122	34	25	21	42	37.7049	-52.5	-43.0328	-1.1413
	bpe-miR166a-3p.tcs.C17T.c	18	GGACCAGGCTTCATTCTC	TTTGAGGGGAATGTCGGCTGGCTCGAGGCTTTTTGGCTTTTGGCATGGGTGGTTTTCTCATGAAAAAAAGAACTCTTAAGGCTTCGGACCAGGCTTCATTCCCCTCAAA	Contig2096	109	23	22	30	34	47.7064	-53.1	-48.7156	-1.02115	GGGGAGGATGAAAAGTGAAGGTCTGGTGTGGGGAATGTTGTCTGGCTCGAGGCCACCAATAGACTGAATGATGACGTTCAGTTTGAGAGAGTTTTCTCGGACCAGGCTTCATTCCCCTCACTATCTTCTCTTTCTCTATCATTTTCTCT	Contig1055	149	31	31	39	48	46.9799	-69.8	-46.8456	-0.997143	GGTTGAGGGGAATGCTGTCTGGTTCGAGACCATTTCTCAGAAGCAAAAACAGAGCATCTTTCAAATGATCTCGGACCAGGCTTCATTCCCCCCCAACT	Contig1270	122	34	25	21	42	37.7049	-52.5	-43.0328	-1.1413
	bpe-miR166a-3p.tcs.GC	21	GGACCAGGCTTCATTCCCCGC	TTTGAGGGGAATGTCGGCTGGCTCGAGGCTTTTTGGCTTTTGGCATGGGTGGTTTTCTCATGAAAAAAAGAACTCTTAAGGCTTCGGACCAGGCTTCATTCCCCTCAAA	Contig2096	109	23	22	30	34	47.7064	-53.1	-48.7156	-1.02115	GGGGAGGATGAAAAGTGAAGGTCTGGTGTGGGGAATGTTGTCTGGCTCGAGGCCACCAATAGACTGAATGATGACGTTCAGTTTGAGAGAGTTTTCTCGGACCAGGCTTCATTCCCCTCACTATCTTCTCTTTCTCTATCATTTTCTCT	Contig1055	149	31	31	39	48	46.9799	-69.8	-46.8456	-0.997143	GGTTGAGGGGAATGCTGTCTGGTTCGAGACCATTTCTCAGAAGCAAAAACAGAGCATCTTTCAAATGATCTCGGACCAGGCTTCATTCCCCCCCAACT	Contig1270	122	34	25	21	42	37.7049	-52.5	-43.0328	-1.1413
	bpe-miR166a-3p.tcs.C9T	19	GGACCAGGTTTCATTCCCC	TTTGAGGGGAATGTCGGCTGGCTCGAGGCTTTTTGGCTTTTGGCATGGGTGGTTTTCTCATGAAAAAAAGAACTCTTAAGGCTTCGGACCAGGCTTCATTCCCCTCAAA	Contig2096	109	23	22	30	34	47.7064	-53.1	-48.7156	-1.02115	GGGGAGGATGAAAAGTGAAGGTCTGGTGTGGGGAATGTTGTCTGGCTCGAGGCCACCAATAGACTGAATGATGACGTTCAGTTTGAGAGAGTTTTCTCGGACCAGGCTTCATTCCCCTCACTATCTTCTCTTTCTCTATCATTTTCTCT	Contig1055	149	31	31	39	48	46.9799	-69.8	-46.8456	-0.997143	GGTTGAGGGGAATGCTGTCTGGTTCGAGACCATTTCTCAGAAGCAAAAACAGAGCATCTTTCAAATGATCTCGGACCAGGCTTCATTCCCCCCCAACT	Contig1270	122	34	25	21	42	37.7049	-52.5	-43.0328	-1.1413
	bpe-miR166a-3p.TTs.T1C.C2G	23	TTCGGGACCAGGCTTCATTCCCC	TTTGAGGGGAATGTCGGCTGGCTCGAGGCTTTTTGGCTTTTGGCATGGGTGGTTTTCTCATGAAAAAAAGAACTCTTAAGGCTTCGGACCAGGCTTCATTCCCCTCAAA	Contig2096	109	23	22	30	34	47.7064	-53.1	-48.7156	-1.02115	GGGGAGGATGAAAAGTGAAGGTCTGGTGTGGGGAATGTTGTCTGGCTCGAGGCCACCAATAGACTGAATGATGACGTTCAGTTTGAGAGAGTTTTCTCGGACCAGGCTTCATTCCCCTCACTATCTTCTCTTTCTCTATCATTTTCTCT	Contig1055	149	31	31	39	48	46.9799	-69.8	-46.8456	-0.997143	GGTTGAGGGGAATGCTGTCTGGTTCGAGACCATTTCTCAGAAGCAAAAACAGAGCATCTTTCAAATGATCTCGGACCAGGCTTCATTCCCCCCCAACT	Contig1270	122	34	25	21	42	37.7049	-52.5	-43.0328	-1.1413
	bpe-miR166a-3p.Ts.C20T.C21T.T	23	TTCGGACCAGGCTTCATTCCTTT	TTTGAGGGGAATGTCGGCTGGCTCGAGGCTTTTTGGCTTTTGGCATGGGTGGTTTTCTCATGAAAAAAAGAACTCTTAAGGCTTCGGACCAGGCTTCATTCCCCTCAAA	Contig2096	109	23	22	30	34	47.7064	-53.1	-48.7156	-1.02115	GGGGAGGATGAAAAGTGAAGGTCTGGTGTGGGGAATGTTGTCTGGCTCGAGGCCACCAATAGACTGAATGATGACGTTCAGTTTGAGAGAGTTTTCTCGGACCAGGCTTCATTCCCCTCACTATCTTCTCTTTCTCTATCATTTTCTCT	Contig1055	149	31	31	39	48	46.9799	-69.8	-46.8456	-0.997143	GGTTGAGGGGAATGCTGTCTGGTTCGAGACCATTTCTCAGAAGCAAAAACAGAGCATCTTTCAAATGATCTCGGACCAGGCTTCATTCCCCCCCAACT	Contig1270	122	34	25	21	42	37.7049	-52.5	-43.0328	-1.1413
bpe-miR482a	bpe-miR482a.T14G.T20G	22	TCTTCCCTACTCCGCCCATGCC	GTGTGGAGAAGGTGAGGAGAGGGAGGGACAATCGGAAACCTATGGCATGGGCGGAGTAGGGAAGACAGACAAACAAACTTGATTTCCTCTGCAACAACCTTTTTTGTCTTCCCCACTCACCCATGCCACAACCTTCCGAAAACCCTAACTCCCTCTCCATGCTCTCCCATAT	Contig1354	172	48	49	38	37	50.5814	-78.6	-45.6977	-0.903448
	bpe-miR482a.T14G.T20G.c	21	TCTTCCCTACTCCGCCCATGC	GTGTGGAGAAGGTGAGGAGAGGGAGGGACAATCGGAAACCTATGGCATGGGCGGAGTAGGGAAGACAGACAAACAAACTTGATTTCCTCTGCAACAACCTTTTTTGTCTTCCCCACTCACCCATGCCACAACCTTCCGAAAACCCTAACTCCCTCTCCATGCTCTCCCATAT	Contig1354	172	48	49	38	37	50.5814	-78.6	-45.6977	-0.903448
	bpe-miR482a.Gs.T14G.T20G	23	GTCTTCCCTACTCCGCCCATGCC	GTGTGGAGAAGGTGAGGAGAGGGAGGGACAATCGGAAACCTATGGCATGGGCGGAGTAGGGAAGACAGACAAACAAACTTGATTTCCTCTGCAACAACCTTTTTTGTCTTCCCCACTCACCCATGCCACAACCTTCCGAAAACCCTAACTCCCTCTCCATGCTCTCCCATAT	Contig1354	172	48	49	38	37	50.5814	-78.6	-45.6977	-0.903448
	bpe-miR482a.T14G.T20G.T	23	TCTTCCCTACTCCGCCCATGCCT	GTGTGGAGAAGGTGAGGAGAGGGAGGGACAATCGGAAACCTATGGCATGGGCGGAGTAGGGAAGACAGACAAACAAACTTGATTTCCTCTGCAACAACCTTTTTTGTCTTCCCCACTCACCCATGCCACAACCTTCCGAAAACCCTAACTCCCTCTCCATGCTCTCCCATAT	Contig1354	172	48	49	38	37	50.5814	-78.6	-45.6977	-0.903448
	bpe-miR482a.ts.T13G.T19G	21	CTTCCCTACTCCGCCCATGCC	GTGTGGAGAAGGTGAGGAGAGGGAGGGACAATCGGAAACCTATGGCATGGGCGGAGTAGGGAAGACAGACAAACAAACTTGATTTCCTCTGCAACAACCTTTTTTGTCTTCCCCACTCACCCATGCCACAACCTTCCGAAAACCCTAACTCCCTCTCCATGCTCTCCCATAT	Contig1354	172	48	49	38	37	50.5814	-78.6	-45.6977	-0.903448
	bpe-miR482a.tcs.T12G.T18G.T	21	TTCCCTACTCCGCCCATGCCT	GTGTGGAGAAGGTGAGGAGAGGGAGGGACAATCGGAAACCTATGGCATGGGCGGAGTAGGGAAGACAGACAAACAAACTTGATTTCCTCTGCAACAACCTTTTTTGTCTTCCCCACTCACCCATGCCACAACCTTCCGAAAACCCTAACTCCCTCTCCATGCTCTCCCATAT	Contig1354	172	48	49	38	37	50.5814	-78.6	-45.6977	-0.903448
	bpe-miR482a.T20G	22	TCTTCCCTACTCCTCCCATGCC	GTGTGGAGAAGGTGAGGAGAGGGAGGGACAATCGGAAACCTATGGCATGGGCGGAGTAGGGAAGACAGACAAACAAACTTGATTTCCTCTGCAACAACCTTTTTTGTCTTCCCCACTCACCCATGCCACAACCTTCCGAAAACCCTAACTCCCTCTCCATGCTCTCCCATAT	Contig1354	172	48	49	38	37	50.5814	-78.6	-45.6977	-0.903448
	bpe-miR482a.ts.T13G.T19G.T	22	CTTCCCTACTCCGCCCATGCCT	GTGTGGAGAAGGTGAGGAGAGGGAGGGACAATCGGAAACCTATGGCATGGGCGGAGTAGGGAAGACAGACAAACAAACTTGATTTCCTCTGCAACAACCTTTTTTGTCTTCCCCACTCACCCATGCCACAACCTTCCGAAAACCCTAACTCCCTCTCCATGCTCTCCCATAT	Contig1354	172	48	49	38	37	50.5814	-78.6	-45.6977	-0.903448
	bpe-miR482a.T14G.C21T.c	21	TCTTCCCTACTCCGCCCATTT	GTGTGGAGAAGGTGAGGAGAGGGAGGGACAATCGGAAACCTATGGCATGGGCGGAGTAGGGAAGACAGACAAACAAACTTGATTTCCTCTGCAACAACCTTTTTTGTCTTCCCCACTCACCCATGCCACAACCTTCCGAAAACCCTAACTCCCTCTCCATGCTCTCCCATAT	Contig1354	172	48	49	38	37	50.5814	-78.6	-45.6977	-0.903448
	bpe-miR482a.Gs.T14G.T20G.c	22	GTCTTCCCTACTCCGCCCATGC	GTGTGGAGAAGGTGAGGAGAGGGAGGGACAATCGGAAACCTATGGCATGGGCGGAGTAGGGAAGACAGACAAACAAACTTGATTTCCTCTGCAACAACCTTTTTTGTCTTCCCCACTCACCCATGCCACAACCTTCCGAAAACCCTAACTCCCTCTCCATGCTCTCCCATAT	Contig1354	172	48	49	38	37	50.5814	-78.6	-45.6977	-0.903448
	bpe-miR482a.C21T	22	TCTTCCCTACTCCTCCCATTTC	GTGTGGAGAAGGTGAGGAGAGGGAGGGACAATCGGAAACCTATGGCATGGGCGGAGTAGGGAAGACAGACAAACAAACTTGATTTCCTCTGCAACAACCTTTTTTGTCTTCCCCACTCACCCATGCCACAACCTTCCGAAAACCCTAACTCCCTCTCCATGCTCTCCCATAT	Contig1354	172	48	49	38	37	50.5814	-78.6	-45.6977	-0.903448
	bpe-miR482a.T20G.C	23	TCTTCCCTACTCCTCCCATGCCC	GTGTGGAGAAGGTGAGGAGAGGGAGGGACAATCGGAAACCTATGGCATGGGCGGAGTAGGGAAGACAGACAAACAAACTTGATTTCCTCTGCAACAACCTTTTTTGTCTTCCCCACTCACCCATGCCACAACCTTCCGAAAACCCTAACTCCCTCTCCATGCTCTCCCATAT	Contig1354	172	48	49	38	37	50.5814	-78.6	-45.6977	-0.903448
	bpe-miR482a.T14G.cc	20	TCTTCCCTACTCCGCCCATT	GTGTGGAGAAGGTGAGGAGAGGGAGGGACAATCGGAAACCTATGGCATGGGCGGAGTAGGGAAGACAGACAAACAAACTTGATTTCCTCTGCAACAACCTTTTTTGTCTTCCCCACTCACCCATGCCACAACCTTCCGAAAACCCTAACTCCCTCTCCATGCTCTCCCATAT	Contig1354	172	48	49	38	37	50.5814	-78.6	-45.6977	-0.903448
	bpe-miR482a.T14G.T20G.TG	24	TCTTCCCTACTCCGCCCATGCCTG	GTGTGGAGAAGGTGAGGAGAGGGAGGGACAATCGGAAACCTATGGCATGGGCGGAGTAGGGAAGACAGACAAACAAACTTGATTTCCTCTGCAACAACCTTTTTTGTCTTCCCCACTCACCCATGCCACAACCTTCCGAAAACCCTAACTCCCTCTCCATGCTCTCCCATAT	Contig1354	172	48	49	38	37	50.5814	-78.6	-45.6977	-0.903448
	bpe-miR482a.tcs.T12G.cc	18	TTCCCTACTCCGCCCATT	GTGTGGAGAAGGTGAGGAGAGGGAGGGACAATCGGAAACCTATGGCATGGGCGGAGTAGGGAAGACAGACAAACAAACTTGATTTCCTCTGCAACAACCTTTTTTGTCTTCCCCACTCACCCATGCCACAACCTTCCGAAAACCCTAACTCCCTCTCCATGCTCTCCCATAT	Contig1354	172	48	49	38	37	50.5814	-78.6	-45.6977	-0.903448
bpe-miR167g	bpe-miR167g	22	TGAAGCTGCCAGCATGATCTGA	TGGTCTTGTCGTGCACCACCAGCGGTTGAAGCTGCCAGCATGATCTGACGTCCTTTCCTCAGCACCCGATATATATATATATCCTGGAAAGAATAGATCATGTTGCAGTTTCACCTGCTGTTTGAAGCATGAGAAAACCA	Contig139	140	37	34	30	39	45.7143	-59.5	-42.5	-0.929688	CCACTAGCAGTTGAAGCTGCCAGCATGATCTAAACTTCCCTCTCGATTACTCAACGAAAGATCAGATCATGTTGGCAGCTTCACCTGGTGATGG	Contig1235	94	25	25	20	24	47.8723	-43.9	-46.7021	-0.975556	AGGAAAAAGTGAAGCTGCCAGCATGATCTAGCTTTGGTTAGAGATATCGATACTACTAACCCTTACTAGGTCATGCTCTGACAGCCTCACTCCTTCCT	Contig1471	98	27	25	19	27	44.898	-42.1	-42.9592	-0.956818	GGCTTTATCGTGGGGCCAACAACAGGTGAAACTGCCGCATGATCTGATCTTTCCTCAGCAAAGGAGGGAGGTTAAGATCATGCTGGCAGCTTCAACTGATACTGGCCCACGTAATTAACAAGAAGGCC	Contig891	128	36	30	34	28	50	-62.6	-48.9062	-0.978125
	bpe-miR167g.C	23	TGAAGCTGCCAGCATGATCTGAC	TGGTCTTGTCGTGCACCACCAGCGGTTGAAGCTGCCAGCATGATCTGACGTCCTTTCCTCAGCACCCGATATATATATATATCCTGGAAAGAATAGATCATGTTGCAGTTTCACCTGCTGTTTGAAGCATGAGAAAACCA	Contig139	140	37	34	30	39	45.7143	-59.5	-42.5	-0.929688	CCACTAGCAGTTGAAGCTGCCAGCATGATCTAAACTTCCCTCTCGATTACTCAACGAAAGATCAGATCATGTTGGCAGCTTCACCTGGTGATGG	Contig1235	94	25	25	20	24	47.8723	-43.9	-46.7021	-0.975556	AGGAAAAAGTGAAGCTGCCAGCATGATCTAGCTTTGGTTAGAGATATCGATACTACTAACCCTTACTAGGTCATGCTCTGACAGCCTCACTCCTTCCT	Contig1471	98	27	25	19	27	44.898	-42.1	-42.9592	-0.956818	GGCTTTATCGTGGGGCCAACAACAGGTGAAACTGCCGCATGATCTGATCTTTCCTCAGCAAAGGAGGGAGGTTAAGATCATGCTGGCAGCTTCAACTGATACTGGCCCACGTAATTAACAAGAAGGCC	Contig891	128	36	30	34	28	50	-62.6	-48.9062	-0.978125
	bpe-miR167g.GC	24	TGAAGCTGCCAGCATGATCTGAGC	TGGTCTTGTCGTGCACCACCAGCGGTTGAAGCTGCCAGCATGATCTGACGTCCTTTCCTCAGCACCCGATATATATATATATCCTGGAAAGAATAGATCATGTTGCAGTTTCACCTGCTGTTTGAAGCATGAGAAAACCA	Contig139	140	37	34	30	39	45.7143	-59.5	-42.5	-0.929688	CCACTAGCAGTTGAAGCTGCCAGCATGATCTAAACTTCCCTCTCGATTACTCAACGAAAGATCAGATCATGTTGGCAGCTTCACCTGGTGATGG	Contig1235	94	25	25	20	24	47.8723	-43.9	-46.7021	-0.975556	AGGAAAAAGTGAAGCTGCCAGCATGATCTAGCTTTGGTTAGAGATATCGATACTACTAACCCTTACTAGGTCATGCTCTGACAGCCTCACTCCTTCCT	Contig1471	98	27	25	19	27	44.898	-42.1	-42.9592	-0.956818	GGCTTTATCGTGGGGCCAACAACAGGTGAAACTGCCGCATGATCTGATCTTTCCTCAGCAAAGGAGGGAGGTTAAGATCATGCTGGCAGCTTCAACTGATACTGGCCCACGTAATTAACAAGAAGGCC	Contig891	128	36	30	34	28	50	-62.6	-48.9062	-0.978125
	bpe-miR167g.ts.G1T.A2G	21	TGAGCTGCCAGCATGATCTGA	TGGTCTTGTCGTGCACCACCAGCGGTTGAAGCTGCCAGCATGATCTGACGTCCTTTCCTCAGCACCCGATATATATATATATCCTGGAAAGAATAGATCATGTTGCAGTTTCACCTGCTGTTTGAAGCATGAGAAAACCA	Contig139	140	37	34	30	39	45.7143	-59.5	-42.5	-0.929688	CCACTAGCAGTTGAAGCTGCCAGCATGATCTAAACTTCCCTCTCGATTACTCAACGAAAGATCAGATCATGTTGGCAGCTTCACCTGGTGATGG	Contig1235	94	25	25	20	24	47.8723	-43.9	-46.7021	-0.975556	AGGAAAAAGTGAAGCTGCCAGCATGATCTAGCTTTGGTTAGAGATATCGATACTACTAACCCTTACTAGGTCATGCTCTGACAGCCTCACTCCTTCCT	Contig1471	98	27	25	19	27	44.898	-42.1	-42.9592	-0.956818	GGCTTTATCGTGGGGCCAACAACAGGTGAAACTGCCGCATGATCTGATCTTTCCTCAGCAAAGGAGGGAGGTTAAGATCATGCTGGCAGCTTCAACTGATACTGGCCCACGTAATTAACAAGAAGGCC	Contig891	128	36	30	34	28	50	-62.6	-48.9062	-0.978125
	bpe-miR167g.Ts.ga	21	TTGAAGCTGCCAGCATGATCT	TGGTCTTGTCGTGCACCACCAGCGGTTGAAGCTGCCAGCATGATCTGACGTCCTTTCCTCAGCACCCGATATATATATATATCCTGGAAAGAATAGATCATGTTGCAGTTTCACCTGCTGTTTGAAGCATGAGAAAACCA	Contig139	140	37	34	30	39	45.7143	-59.5	-42.5	-0.929688	CCACTAGCAGTTGAAGCTGCCAGCATGATCTAAACTTCCCTCTCGATTACTCAACGAAAGATCAGATCATGTTGGCAGCTTCACCTGGTGATGG	Contig1235	94	25	25	20	24	47.8723	-43.9	-46.7021	-0.975556	AGGAAAAAGTGAAGCTGCCAGCATGATCTAGCTTTGGTTAGAGATATCGATACTACTAACCCTTACTAGGTCATGCTCTGACAGCCTCACTCCTTCCT	Contig1471	98	27	25	19	27	44.898	-42.1	-42.9592	-0.956818	GGCTTTATCGTGGGGCCAACAACAGGTGAAACTGCCGCATGATCTGATCTTTCCTCAGCAAAGGAGGGAGGTTAAGATCATGCTGGCAGCTTCAACTGATACTGGCCCACGTAATTAACAAGAAGGCC	Contig891	128	36	30	34	28	50	-62.6	-48.9062	-0.978125
	bpe-miR167g.T1A	22	AGAAGCTGCCAGCATGATCTGA	TGGTCTTGTCGTGCACCACCAGCGGTTGAAGCTGCCAGCATGATCTGACGTCCTTTCCTCAGCACCCGATATATATATATATCCTGGAAAGAATAGATCATGTTGCAGTTTCACCTGCTGTTTGAAGCATGAGAAAACCA	Contig139	140	37	34	30	39	45.7143	-59.5	-42.5	-0.929688	CCACTAGCAGTTGAAGCTGCCAGCATGATCTAAACTTCCCTCTCGATTACTCAACGAAAGATCAGATCATGTTGGCAGCTTCACCTGGTGATGG	Contig1235	94	25	25	20	24	47.8723	-43.9	-46.7021	-0.975556	AGGAAAAAGTGAAGCTGCCAGCATGATCTAGCTTTGGTTAGAGATATCGATACTACTAACCCTTACTAGGTCATGCTCTGACAGCCTCACTCCTTCCT	Contig1471	98	27	25	19	27	44.898	-42.1	-42.9592	-0.956818	GGCTTTATCGTGGGGCCAACAACAGGTGAAACTGCCGCATGATCTGATCTTTCCTCAGCAAAGGAGGGAGGTTAAGATCATGCTGGCAGCTTCAACTGATACTGGCCCACGTAATTAACAAGAAGGCC	Contig891	128	36	30	34	28	50	-62.6	-48.9062	-0.978125
	bpe-miR167g.A3T	22	TGTAGCTGCCAGCATGATCTGA	TGGTCTTGTCGTGCACCACCAGCGGTTGAAGCTGCCAGCATGATCTGACGTCCTTTCCTCAGCACCCGATATATATATATATCCTGGAAAGAATAGATCATGTTGCAGTTTCACCTGCTGTTTGAAGCATGAGAAAACCA	Contig139	140	37	34	30	39	45.7143	-59.5	-42.5	-0.929688	CCACTAGCAGTTGAAGCTGCCAGCATGATCTAAACTTCCCTCTCGATTACTCAACGAAAGATCAGATCATGTTGGCAGCTTCACCTGGTGATGG	Contig1235	94	25	25	20	24	47.8723	-43.9	-46.7021	-0.975556	AGGAAAAAGTGAAGCTGCCAGCATGATCTAGCTTTGGTTAGAGATATCGATACTACTAACCCTTACTAGGTCATGCTCTGACAGCCTCACTCCTTCCT	Contig1471	98	27	25	19	27	44.898	-42.1	-42.9592	-0.956818	GGCTTTATCGTGGGGCCAACAACAGGTGAAACTGCCGCATGATCTGATCTTTCCTCAGCAAAGGAGGGAGGTTAAGATCATGCTGGCAGCTTCAACTGATACTGGCCCACGTAATTAACAAGAAGGCC	Contig891	128	36	30	34	28	50	-62.6	-48.9062	-0.978125
	bpe-miR167g.T20G	22	TGAAGCTGCCAGCATGATCGGA	TGGTCTTGTCGTGCACCACCAGCGGTTGAAGCTGCCAGCATGATCTGACGTCCTTTCCTCAGCACCCGATATATATATATATCCTGGAAAGAATAGATCATGTTGCAGTTTCACCTGCTGTTTGAAGCATGAGAAAACCA	Contig139	140	37	34	30	39	45.7143	-59.5	-42.5	-0.929688	CCACTAGCAGTTGAAGCTGCCAGCATGATCTAAACTTCCCTCTCGATTACTCAACGAAAGATCAGATCATGTTGGCAGCTTCACCTGGTGATGG	Contig1235	94	25	25	20	24	47.8723	-43.9	-46.7021	-0.975556	AGGAAAAAGTGAAGCTGCCAGCATGATCTAGCTTTGGTTAGAGATATCGATACTACTAACCCTTACTAGGTCATGCTCTGACAGCCTCACTCCTTCCT	Contig1471	98	27	25	19	27	44.898	-42.1	-42.9592	-0.956818	GGCTTTATCGTGGGGCCAACAACAGGTGAAACTGCCGCATGATCTGATCTTTCCTCAGCAAAGGAGGGAGGTTAAGATCATGCTGGCAGCTTCAACTGATACTGGCCCACGTAATTAACAAGAAGGCC	Contig891	128	36	30	34	28	50	-62.6	-48.9062	-0.978125
	bpe-miR167g.G	23	TGAAGCTGCCAGCATGATCTGAG	TGGTCTTGTCGTGCACCACCAGCGGTTGAAGCTGCCAGCATGATCTGACGTCCTTTCCTCAGCACCCGATATATATATATATCCTGGAAAGAATAGATCATGTTGCAGTTTCACCTGCTGTTTGAAGCATGAGAAAACCA	Contig139	140	37	34	30	39	45.7143	-59.5	-42.5	-0.929688	CCACTAGCAGTTGAAGCTGCCAGCATGATCTAAACTTCCCTCTCGATTACTCAACGAAAGATCAGATCATGTTGGCAGCTTCACCTGGTGATGG	Contig1235	94	25	25	20	24	47.8723	-43.9	-46.7021	-0.975556	AGGAAAAAGTGAAGCTGCCAGCATGATCTAGCTTTGGTTAGAGATATCGATACTACTAACCCTTACTAGGTCATGCTCTGACAGCCTCACTCCTTCCT	Contig1471	98	27	25	19	27	44.898	-42.1	-42.9592	-0.956818	GGCTTTATCGTGGGGCCAACAACAGGTGAAACTGCCGCATGATCTGATCTTTCCTCAGCAAAGGAGGGAGGTTAAGATCATGCTGGCAGCTTCAACTGATACTGGCCCACGTAATTAACAAGAAGGCC	Contig891	128	36	30	34	28	50	-62.6	-48.9062	-0.978125
	bpe-miR167g.A.T	24	TGAAGCTGCCAGCATGATCTGAAT	TGGTCTTGTCGTGCACCACCAGCGGTTGAAGCTGCCAGCATGATCTGACGTCCTTTCCTCAGCACCCGATATATATATATATCCTGGAAAGAATAGATCATGTTGCAGTTTCACCTGCTGTTTGAAGCATGAGAAAACCA	Contig139	140	37	34	30	39	45.7143	-59.5	-42.5	-0.929688	CCACTAGCAGTTGAAGCTGCCAGCATGATCTAAACTTCCCTCTCGATTACTCAACGAAAGATCAGATCATGTTGGCAGCTTCACCTGGTGATGG	Contig1235	94	25	25	20	24	47.8723	-43.9	-46.7021	-0.975556	AGGAAAAAGTGAAGCTGCCAGCATGATCTAGCTTTGGTTAGAGATATCGATACTACTAACCCTTACTAGGTCATGCTCTGACAGCCTCACTCCTTCCT	Contig1471	98	27	25	19	27	44.898	-42.1	-42.9592	-0.956818	GGCTTTATCGTGGGGCCAACAACAGGTGAAACTGCCGCATGATCTGATCTTTCCTCAGCAAAGGAGGGAGGTTAAGATCATGCTGGCAGCTTCAACTGATACTGGCCCACGTAATTAACAAGAAGGCC	Contig891	128	36	30	34	28	50	-62.6	-48.9062	-0.978125
	bpe-miR167g.GA	24	TGAAGCTGCCAGCATGATCTGAGA	TGGTCTTGTCGTGCACCACCAGCGGTTGAAGCTGCCAGCATGATCTGACGTCCTTTCCTCAGCACCCGATATATATATATATCCTGGAAAGAATAGATCATGTTGCAGTTTCACCTGCTGTTTGAAGCATGAGAAAACCA	Contig139	140	37	34	30	39	45.7143	-59.5	-42.5	-0.929688	CCACTAGCAGTTGAAGCTGCCAGCATGATCTAAACTTCCCTCTCGATTACTCAACGAAAGATCAGATCATGTTGGCAGCTTCACCTGGTGATGG	Contig1235	94	25	25	20	24	47.8723	-43.9	-46.7021	-0.975556	AGGAAAAAGTGAAGCTGCCAGCATGATCTAGCTTTGGTTAGAGATATCGATACTACTAACCCTTACTAGGTCATGCTCTGACAGCCTCACTCCTTCCT	Contig1471	98	27	25	19	27	44.898	-42.1	-42.9592	-0.956818	GGCTTTATCGTGGGGCCAACAACAGGTGAAACTGCCGCATGATCTGATCTTTCCTCAGCAAAGGAGGGAGGTTAAGATCATGCTGGCAGCTTCAACTGATACTGGCCCACGTAATTAACAAGAAGGCC	Contig891	128	36	30	34	28	50	-62.6	-48.9062	-0.978125
	bpe-miR167g.GT	24	TGAAGCTGCCAGCATGATCTGAGT	TGGTCTTGTCGTGCACCACCAGCGGTTGAAGCTGCCAGCATGATCTGACGTCCTTTCCTCAGCACCCGATATATATATATATCCTGGAAAGAATAGATCATGTTGCAGTTTCACCTGCTGTTTGAAGCATGAGAAAACCA	Contig139	140	37	34	30	39	45.7143	-59.5	-42.5	-0.929688	CCACTAGCAGTTGAAGCTGCCAGCATGATCTAAACTTCCCTCTCGATTACTCAACGAAAGATCAGATCATGTTGGCAGCTTCACCTGGTGATGG	Contig1235	94	25	25	20	24	47.8723	-43.9	-46.7021	-0.975556	AGGAAAAAGTGAAGCTGCCAGCATGATCTAGCTTTGGTTAGAGATATCGATACTACTAACCCTTACTAGGTCATGCTCTGACAGCCTCACTCCTTCCT	Contig1471	98	27	25	19	27	44.898	-42.1	-42.9592	-0.956818	GGCTTTATCGTGGGGCCAACAACAGGTGAAACTGCCGCATGATCTGATCTTTCCTCAGCAAAGGAGGGAGGTTAAGATCATGCTGGCAGCTTCAACTGATACTGGCCCACGTAATTAACAAGAAGGCC	Contig891	128	36	30	34	28	50	-62.6	-48.9062	-0.978125
	bpe-miR167g.G21T.GT	24	TGAAGCTGCCAGCATGATCTTAGT	TGGTCTTGTCGTGCACCACCAGCGGTTGAAGCTGCCAGCATGATCTGACGTCCTTTCCTCAGCACCCGATATATATATATATCCTGGAAAGAATAGATCATGTTGCAGTTTCACCTGCTGTTTGAAGCATGAGAAAACCA	Contig139	140	37	34	30	39	45.7143	-59.5	-42.5	-0.929688	CCACTAGCAGTTGAAGCTGCCAGCATGATCTAAACTTCCCTCTCGATTACTCAACGAAAGATCAGATCATGTTGGCAGCTTCACCTGGTGATGG	Contig1235	94	25	25	20	24	47.8723	-43.9	-46.7021	-0.975556	AGGAAAAAGTGAAGCTGCCAGCATGATCTAGCTTTGGTTAGAGATATCGATACTACTAACCCTTACTAGGTCATGCTCTGACAGCCTCACTCCTTCCT	Contig1471	98	27	25	19	27	44.898	-42.1	-42.9592	-0.956818	GGCTTTATCGTGGGGCCAACAACAGGTGAAACTGCCGCATGATCTGATCTTTCCTCAGCAAAGGAGGGAGGTTAAGATCATGCTGGCAGCTTCAACTGATACTGGCCCACGTAATTAACAAGAAGGCC	Contig891	128	36	30	34	28	50	-62.6	-48.9062	-0.978125
	bpe-miR167g.ts	21	GAAGCTGCCAGCATGATCTGA	TGGTCTTGTCGTGCACCACCAGCGGTTGAAGCTGCCAGCATGATCTGACGTCCTTTCCTCAGCACCCGATATATATATATATCCTGGAAAGAATAGATCATGTTGCAGTTTCACCTGCTGTTTGAAGCATGAGAAAACCA	Contig139	140	37	34	30	39	45.7143	-59.5	-42.5	-0.929688	CCACTAGCAGTTGAAGCTGCCAGCATGATCTAAACTTCCCTCTCGATTACTCAACGAAAGATCAGATCATGTTGGCAGCTTCACCTGGTGATGG	Contig1235	94	25	25	20	24	47.8723	-43.9	-46.7021	-0.975556	AGGAAAAAGTGAAGCTGCCAGCATGATCTAGCTTTGGTTAGAGATATCGATACTACTAACCCTTACTAGGTCATGCTCTGACAGCCTCACTCCTTCCT	Contig1471	98	27	25	19	27	44.898	-42.1	-42.9592	-0.956818	GGCTTTATCGTGGGGCCAACAACAGGTGAAACTGCCGCATGATCTGATCTTTCCTCAGCAAAGGAGGGAGGTTAAGATCATGCTGGCAGCTTCAACTGATACTGGCCCACGTAATTAACAAGAAGGCC	Contig891	128	36	30	34	28	50	-62.6	-48.9062	-0.978125
	bpe-miR167g.Ts.T1A.A22T	23	TAGAAGCTGCCAGCATGATCTGT	TGGTCTTGTCGTGCACCACCAGCGGTTGAAGCTGCCAGCATGATCTGACGTCCTTTCCTCAGCACCCGATATATATATATATCCTGGAAAGAATAGATCATGTTGCAGTTTCACCTGCTGTTTGAAGCATGAGAAAACCA	Contig139	140	37	34	30	39	45.7143	-59.5	-42.5	-0.929688	CCACTAGCAGTTGAAGCTGCCAGCATGATCTAAACTTCCCTCTCGATTACTCAACGAAAGATCAGATCATGTTGGCAGCTTCACCTGGTGATGG	Contig1235	94	25	25	20	24	47.8723	-43.9	-46.7021	-0.975556	AGGAAAAAGTGAAGCTGCCAGCATGATCTAGCTTTGGTTAGAGATATCGATACTACTAACCCTTACTAGGTCATGCTCTGACAGCCTCACTCCTTCCT	Contig1471	98	27	25	19	27	44.898	-42.1	-42.9592	-0.956818	GGCTTTATCGTGGGGCCAACAACAGGTGAAACTGCCGCATGATCTGATCTTTCCTCAGCAAAGGAGGGAGGTTAAGATCATGCTGGCAGCTTCAACTGATACTGGCCCACGTAATTAACAAGAAGGCC	Contig891	128	36	30	34	28	50	-62.6	-48.9062	-0.978125
	bpe-miR167g.Ts.T1G.G2T	23	TGTAAGCTGCCAGCATGATCTGA	TGGTCTTGTCGTGCACCACCAGCGGTTGAAGCTGCCAGCATGATCTGACGTCCTTTCCTCAGCACCCGATATATATATATATCCTGGAAAGAATAGATCATGTTGCAGTTTCACCTGCTGTTTGAAGCATGAGAAAACCA	Contig139	140	37	34	30	39	45.7143	-59.5	-42.5	-0.929688	CCACTAGCAGTTGAAGCTGCCAGCATGATCTAAACTTCCCTCTCGATTACTCAACGAAAGATCAGATCATGTTGGCAGCTTCACCTGGTGATGG	Contig1235	94	25	25	20	24	47.8723	-43.9	-46.7021	-0.975556	AGGAAAAAGTGAAGCTGCCAGCATGATCTAGCTTTGGTTAGAGATATCGATACTACTAACCCTTACTAGGTCATGCTCTGACAGCCTCACTCCTTCCT	Contig1471	98	27	25	19	27	44.898	-42.1	-42.9592	-0.956818	GGCTTTATCGTGGGGCCAACAACAGGTGAAACTGCCGCATGATCTGATCTTTCCTCAGCAAAGGAGGGAGGTTAAGATCATGCTGGCAGCTTCAACTGATACTGGCCCACGTAATTAACAAGAAGGCC	Contig891	128	36	30	34	28	50	-62.6	-48.9062	-0.978125
	bpe-miR167g.Ts.T1A	23	TAGAAGCTGCCAGCATGATCTGA	TGGTCTTGTCGTGCACCACCAGCGGTTGAAGCTGCCAGCATGATCTGACGTCCTTTCCTCAGCACCCGATATATATATATATCCTGGAAAGAATAGATCATGTTGCAGTTTCACCTGCTGTTTGAAGCATGAGAAAACCA	Contig139	140	37	34	30	39	45.7143	-59.5	-42.5	-0.929688	CCACTAGCAGTTGAAGCTGCCAGCATGATCTAAACTTCCCTCTCGATTACTCAACGAAAGATCAGATCATGTTGGCAGCTTCACCTGGTGATGG	Contig1235	94	25	25	20	24	47.8723	-43.9	-46.7021	-0.975556	AGGAAAAAGTGAAGCTGCCAGCATGATCTAGCTTTGGTTAGAGATATCGATACTACTAACCCTTACTAGGTCATGCTCTGACAGCCTCACTCCTTCCT	Contig1471	98	27	25	19	27	44.898	-42.1	-42.9592	-0.956818	GGCTTTATCGTGGGGCCAACAACAGGTGAAACTGCCGCATGATCTGATCTTTCCTCAGCAAAGGAGGGAGGTTAAGATCATGCTGGCAGCTTCAACTGATACTGGCCCACGTAATTAACAAGAAGGCC	Contig891	128	36	30	34	28	50	-62.6	-48.9062	-0.978125
	bpe-miR167g.Ts	23	TTGAAGCTGCCAGCATGATCTGA	TGGTCTTGTCGTGCACCACCAGCGGTTGAAGCTGCCAGCATGATCTGACGTCCTTTCCTCAGCACCCGATATATATATATATCCTGGAAAGAATAGATCATGTTGCAGTTTCACCTGCTGTTTGAAGCATGAGAAAACCA	Contig139	140	37	34	30	39	45.7143	-59.5	-42.5	-0.929688	CCACTAGCAGTTGAAGCTGCCAGCATGATCTAAACTTCCCTCTCGATTACTCAACGAAAGATCAGATCATGTTGGCAGCTTCACCTGGTGATGG	Contig1235	94	25	25	20	24	47.8723	-43.9	-46.7021	-0.975556	AGGAAAAAGTGAAGCTGCCAGCATGATCTAGCTTTGGTTAGAGATATCGATACTACTAACCCTTACTAGGTCATGCTCTGACAGCCTCACTCCTTCCT	Contig1471	98	27	25	19	27	44.898	-42.1	-42.9592	-0.956818	GGCTTTATCGTGGGGCCAACAACAGGTGAAACTGCCGCATGATCTGATCTTTCCTCAGCAAAGGAGGGAGGTTAAGATCATGCTGGCAGCTTCAACTGATACTGGCCCACGTAATTAACAAGAAGGCC	Contig891	128	36	30	34	28	50	-62.6	-48.9062	-0.978125
	bpe-miR167g.A14T	22	TGAAGCTGCCAGCTTGATCTGA	TGGTCTTGTCGTGCACCACCAGCGGTTGAAGCTGCCAGCATGATCTGACGTCCTTTCCTCAGCACCCGATATATATATATATCCTGGAAAGAATAGATCATGTTGCAGTTTCACCTGCTGTTTGAAGCATGAGAAAACCA	Contig139	140	37	34	30	39	45.7143	-59.5	-42.5	-0.929688	CCACTAGCAGTTGAAGCTGCCAGCATGATCTAAACTTCCCTCTCGATTACTCAACGAAAGATCAGATCATGTTGGCAGCTTCACCTGGTGATGG	Contig1235	94	25	25	20	24	47.8723	-43.9	-46.7021	-0.975556	AGGAAAAAGTGAAGCTGCCAGCATGATCTAGCTTTGGTTAGAGATATCGATACTACTAACCCTTACTAGGTCATGCTCTGACAGCCTCACTCCTTCCT	Contig1471	98	27	25	19	27	44.898	-42.1	-42.9592	-0.956818	GGCTTTATCGTGGGGCCAACAACAGGTGAAACTGCCGCATGATCTGATCTTTCCTCAGCAAAGGAGGGAGGTTAAGATCATGCTGGCAGCTTCAACTGATACTGGCCCACGTAATTAACAAGAAGGCC	Contig891	128	36	30	34	28	50	-62.6	-48.9062	-0.978125
	bpe-miR167g.G5T	22	TGAATCTGCCAGCATGATCTGA	TGGTCTTGTCGTGCACCACCAGCGGTTGAAGCTGCCAGCATGATCTGACGTCCTTTCCTCAGCACCCGATATATATATATATCCTGGAAAGAATAGATCATGTTGCAGTTTCACCTGCTGTTTGAAGCATGAGAAAACCA	Contig139	140	37	34	30	39	45.7143	-59.5	-42.5	-0.929688	CCACTAGCAGTTGAAGCTGCCAGCATGATCTAAACTTCCCTCTCGATTACTCAACGAAAGATCAGATCATGTTGGCAGCTTCACCTGGTGATGG	Contig1235	94	25	25	20	24	47.8723	-43.9	-46.7021	-0.975556	AGGAAAAAGTGAAGCTGCCAGCATGATCTAGCTTTGGTTAGAGATATCGATACTACTAACCCTTACTAGGTCATGCTCTGACAGCCTCACTCCTTCCT	Contig1471	98	27	25	19	27	44.898	-42.1	-42.9592	-0.956818	GGCTTTATCGTGGGGCCAACAACAGGTGAAACTGCCGCATGATCTGATCTTTCCTCAGCAAAGGAGGGAGGTTAAGATCATGCTGGCAGCTTCAACTGATACTGGCCCACGTAATTAACAAGAAGGCC	Contig891	128	36	30	34	28	50	-62.6	-48.9062	-0.978125
	bpe-miR167g.C10T	22	TGAAGCTGCTAGCATGATCTGA	TGGTCTTGTCGTGCACCACCAGCGGTTGAAGCTGCCAGCATGATCTGACGTCCTTTCCTCAGCACCCGATATATATATATATCCTGGAAAGAATAGATCATGTTGCAGTTTCACCTGCTGTTTGAAGCATGAGAAAACCA	Contig139	140	37	34	30	39	45.7143	-59.5	-42.5	-0.929688	CCACTAGCAGTTGAAGCTGCCAGCATGATCTAAACTTCCCTCTCGATTACTCAACGAAAGATCAGATCATGTTGGCAGCTTCACCTGGTGATGG	Contig1235	94	25	25	20	24	47.8723	-43.9	-46.7021	-0.975556	AGGAAAAAGTGAAGCTGCCAGCATGATCTAGCTTTGGTTAGAGATATCGATACTACTAACCCTTACTAGGTCATGCTCTGACAGCCTCACTCCTTCCT	Contig1471	98	27	25	19	27	44.898	-42.1	-42.9592	-0.956818	GGCTTTATCGTGGGGCCAACAACAGGTGAAACTGCCGCATGATCTGATCTTTCCTCAGCAAAGGAGGGAGGTTAAGATCATGCTGGCAGCTTCAACTGATACTGGCCCACGTAATTAACAAGAAGGCC	Contig891	128	36	30	34	28	50	-62.6	-48.9062	-0.978125
	bpe-miR167g.G2A	22	TAAAGCTGCCAGCATGATCTGA	TGGTCTTGTCGTGCACCACCAGCGGTTGAAGCTGCCAGCATGATCTGACGTCCTTTCCTCAGCACCCGATATATATATATATCCTGGAAAGAATAGATCATGTTGCAGTTTCACCTGCTGTTTGAAGCATGAGAAAACCA	Contig139	140	37	34	30	39	45.7143	-59.5	-42.5	-0.929688	CCACTAGCAGTTGAAGCTGCCAGCATGATCTAAACTTCCCTCTCGATTACTCAACGAAAGATCAGATCATGTTGGCAGCTTCACCTGGTGATGG	Contig1235	94	25	25	20	24	47.8723	-43.9	-46.7021	-0.975556	AGGAAAAAGTGAAGCTGCCAGCATGATCTAGCTTTGGTTAGAGATATCGATACTACTAACCCTTACTAGGTCATGCTCTGACAGCCTCACTCCTTCCT	Contig1471	98	27	25	19	27	44.898	-42.1	-42.9592	-0.956818	GGCTTTATCGTGGGGCCAACAACAGGTGAAACTGCCGCATGATCTGATCTTTCCTCAGCAAAGGAGGGAGGTTAAGATCATGCTGGCAGCTTCAACTGATACTGGCCCACGTAATTAACAAGAAGGCC	Contig891	128	36	30	34	28	50	-62.6	-48.9062	-0.978125
	bpe-miR167g.T7A	22	TGAAGCAGCCAGCATGATCTGA	TGGTCTTGTCGTGCACCACCAGCGGTTGAAGCTGCCAGCATGATCTGACGTCCTTTCCTCAGCACCCGATATATATATATATCCTGGAAAGAATAGATCATGTTGCAGTTTCACCTGCTGTTTGAAGCATGAGAAAACCA	Contig139	140	37	34	30	39	45.7143	-59.5	-42.5	-0.929688	CCACTAGCAGTTGAAGCTGCCAGCATGATCTAAACTTCCCTCTCGATTACTCAACGAAAGATCAGATCATGTTGGCAGCTTCACCTGGTGATGG	Contig1235	94	25	25	20	24	47.8723	-43.9	-46.7021	-0.975556	AGGAAAAAGTGAAGCTGCCAGCATGATCTAGCTTTGGTTAGAGATATCGATACTACTAACCCTTACTAGGTCATGCTCTGACAGCCTCACTCCTTCCT	Contig1471	98	27	25	19	27	44.898	-42.1	-42.9592	-0.956818	GGCTTTATCGTGGGGCCAACAACAGGTGAAACTGCCGCATGATCTGATCTTTCCTCAGCAAAGGAGGGAGGTTAAGATCATGCTGGCAGCTTCAACTGATACTGGCCCACGTAATTAACAAGAAGGCC	Contig891	128	36	30	34	28	50	-62.6	-48.9062	-0.978125
	bpe-miR167g.T18C	22	TGAAGCTGCCAGCATGACCTGA	TGGTCTTGTCGTGCACCACCAGCGGTTGAAGCTGCCAGCATGATCTGACGTCCTTTCCTCAGCACCCGATATATATATATATCCTGGAAAGAATAGATCATGTTGCAGTTTCACCTGCTGTTTGAAGCATGAGAAAACCA	Contig139	140	37	34	30	39	45.7143	-59.5	-42.5	-0.929688	CCACTAGCAGTTGAAGCTGCCAGCATGATCTAAACTTCCCTCTCGATTACTCAACGAAAGATCAGATCATGTTGGCAGCTTCACCTGGTGATGG	Contig1235	94	25	25	20	24	47.8723	-43.9	-46.7021	-0.975556	AGGAAAAAGTGAAGCTGCCAGCATGATCTAGCTTTGGTTAGAGATATCGATACTACTAACCCTTACTAGGTCATGCTCTGACAGCCTCACTCCTTCCT	Contig1471	98	27	25	19	27	44.898	-42.1	-42.9592	-0.956818	GGCTTTATCGTGGGGCCAACAACAGGTGAAACTGCCGCATGATCTGATCTTTCCTCAGCAAAGGAGGGAGGTTAAGATCATGCTGGCAGCTTCAACTGATACTGGCCCACGTAATTAACAAGAAGGCC	Contig891	128	36	30	34	28	50	-62.6	-48.9062	-0.978125
	bpe-miR167g.A14T.T15A	22	TGAAGCTGCCAGCTAGATCTGA	TGGTCTTGTCGTGCACCACCAGCGGTTGAAGCTGCCAGCATGATCTGACGTCCTTTCCTCAGCACCCGATATATATATATATCCTGGAAAGAATAGATCATGTTGCAGTTTCACCTGCTGTTTGAAGCATGAGAAAACCA	Contig139	140	37	34	30	39	45.7143	-59.5	-42.5	-0.929688	CCACTAGCAGTTGAAGCTGCCAGCATGATCTAAACTTCCCTCTCGATTACTCAACGAAAGATCAGATCATGTTGGCAGCTTCACCTGGTGATGG	Contig1235	94	25	25	20	24	47.8723	-43.9	-46.7021	-0.975556	AGGAAAAAGTGAAGCTGCCAGCATGATCTAGCTTTGGTTAGAGATATCGATACTACTAACCCTTACTAGGTCATGCTCTGACAGCCTCACTCCTTCCT	Contig1471	98	27	25	19	27	44.898	-42.1	-42.9592	-0.956818	GGCTTTATCGTGGGGCCAACAACAGGTGAAACTGCCGCATGATCTGATCTTTCCTCAGCAAAGGAGGGAGGTTAAGATCATGCTGGCAGCTTCAACTGATACTGGCCCACGTAATTAACAAGAAGGCC	Contig891	128	36	30	34	28	50	-62.6	-48.9062	-0.978125
	bpe-miR167g.G16T	22	TGAAGCTGCCAGCATTATCTGA	TGGTCTTGTCGTGCACCACCAGCGGTTGAAGCTGCCAGCATGATCTGACGTCCTTTCCTCAGCACCCGATATATATATATATCCTGGAAAGAATAGATCATGTTGCAGTTTCACCTGCTGTTTGAAGCATGAGAAAACCA	Contig139	140	37	34	30	39	45.7143	-59.5	-42.5	-0.929688	CCACTAGCAGTTGAAGCTGCCAGCATGATCTAAACTTCCCTCTCGATTACTCAACGAAAGATCAGATCATGTTGGCAGCTTCACCTGGTGATGG	Contig1235	94	25	25	20	24	47.8723	-43.9	-46.7021	-0.975556	AGGAAAAAGTGAAGCTGCCAGCATGATCTAGCTTTGGTTAGAGATATCGATACTACTAACCCTTACTAGGTCATGCTCTGACAGCCTCACTCCTTCCT	Contig1471	98	27	25	19	27	44.898	-42.1	-42.9592	-0.956818	GGCTTTATCGTGGGGCCAACAACAGGTGAAACTGCCGCATGATCTGATCTTTCCTCAGCAAAGGAGGGAGGTTAAGATCATGCTGGCAGCTTCAACTGATACTGGCCCACGTAATTAACAAGAAGGCC	Contig891	128	36	30	34	28	50	-62.6	-48.9062	-0.978125
	bpe-miR167g.C9T.GA	24	TGAAGCTGTCAGCATGATCTGAGA	TGGTCTTGTCGTGCACCACCAGCGGTTGAAGCTGCCAGCATGATCTGACGTCCTTTCCTCAGCACCCGATATATATATATATCCTGGAAAGAATAGATCATGTTGCAGTTTCACCTGCTGTTTGAAGCATGAGAAAACCA	Contig139	140	37	34	30	39	45.7143	-59.5	-42.5	-0.929688	CCACTAGCAGTTGAAGCTGCCAGCATGATCTAAACTTCCCTCTCGATTACTCAACGAAAGATCAGATCATGTTGGCAGCTTCACCTGGTGATGG	Contig1235	94	25	25	20	24	47.8723	-43.9	-46.7021	-0.975556	AGGAAAAAGTGAAGCTGCCAGCATGATCTAGCTTTGGTTAGAGATATCGATACTACTAACCCTTACTAGGTCATGCTCTGACAGCCTCACTCCTTCCT	Contig1471	98	27	25	19	27	44.898	-42.1	-42.9592	-0.956818	GGCTTTATCGTGGGGCCAACAACAGGTGAAACTGCCGCATGATCTGATCTTTCCTCAGCAAAGGAGGGAGGTTAAGATCATGCTGGCAGCTTCAACTGATACTGGCCCACGTAATTAACAAGAAGGCC	Contig891	128	36	30	34	28	50	-62.6	-48.9062	-0.978125
	bpe-miR167g.A22C.GT	24	TGAAGCTGCCAGCATGATCTGCGT	TGGTCTTGTCGTGCACCACCAGCGGTTGAAGCTGCCAGCATGATCTGACGTCCTTTCCTCAGCACCCGATATATATATATATCCTGGAAAGAATAGATCATGTTGCAGTTTCACCTGCTGTTTGAAGCATGAGAAAACCA	Contig139	140	37	34	30	39	45.7143	-59.5	-42.5	-0.929688	CCACTAGCAGTTGAAGCTGCCAGCATGATCTAAACTTCCCTCTCGATTACTCAACGAAAGATCAGATCATGTTGGCAGCTTCACCTGGTGATGG	Contig1235	94	25	25	20	24	47.8723	-43.9	-46.7021	-0.975556	AGGAAAAAGTGAAGCTGCCAGCATGATCTAGCTTTGGTTAGAGATATCGATACTACTAACCCTTACTAGGTCATGCTCTGACAGCCTCACTCCTTCCT	Contig1471	98	27	25	19	27	44.898	-42.1	-42.9592	-0.956818	GGCTTTATCGTGGGGCCAACAACAGGTGAAACTGCCGCATGATCTGATCTTTCCTCAGCAAAGGAGGGAGGTTAAGATCATGCTGGCAGCTTCAACTGATACTGGCCCACGTAATTAACAAGAAGGCC	Contig891	128	36	30	34	28	50	-62.6	-48.9062	-0.978125
	bpe-miR167g.TT	24	TGAAGCTGCCAGCATGATCTGATT	TGGTCTTGTCGTGCACCACCAGCGGTTGAAGCTGCCAGCATGATCTGACGTCCTTTCCTCAGCACCCGATATATATATATATCCTGGAAAGAATAGATCATGTTGCAGTTTCACCTGCTGTTTGAAGCATGAGAAAACCA	Contig139	140	37	34	30	39	45.7143	-59.5	-42.5	-0.929688	CCACTAGCAGTTGAAGCTGCCAGCATGATCTAAACTTCCCTCTCGATTACTCAACGAAAGATCAGATCATGTTGGCAGCTTCACCTGGTGATGG	Contig1235	94	25	25	20	24	47.8723	-43.9	-46.7021	-0.975556	AGGAAAAAGTGAAGCTGCCAGCATGATCTAGCTTTGGTTAGAGATATCGATACTACTAACCCTTACTAGGTCATGCTCTGACAGCCTCACTCCTTCCT	Contig1471	98	27	25	19	27	44.898	-42.1	-42.9592	-0.956818	GGCTTTATCGTGGGGCCAACAACAGGTGAAACTGCCGCATGATCTGATCTTTCCTCAGCAAAGGAGGGAGGTTAAGATCATGCTGGCAGCTTCAACTGATACTGGCCCACGTAATTAACAAGAAGGCC	Contig891	128	36	30	34	28	50	-62.6	-48.9062	-0.978125
	bpe-miR167g.A22T.CC	24	TGAAGCTGCCAGCATGATCTGTCC	TGGTCTTGTCGTGCACCACCAGCGGTTGAAGCTGCCAGCATGATCTGACGTCCTTTCCTCAGCACCCGATATATATATATATCCTGGAAAGAATAGATCATGTTGCAGTTTCACCTGCTGTTTGAAGCATGAGAAAACCA	Contig139	140	37	34	30	39	45.7143	-59.5	-42.5	-0.929688	CCACTAGCAGTTGAAGCTGCCAGCATGATCTAAACTTCCCTCTCGATTACTCAACGAAAGATCAGATCATGTTGGCAGCTTCACCTGGTGATGG	Contig1235	94	25	25	20	24	47.8723	-43.9	-46.7021	-0.975556	AGGAAAAAGTGAAGCTGCCAGCATGATCTAGCTTTGGTTAGAGATATCGATACTACTAACCCTTACTAGGTCATGCTCTGACAGCCTCACTCCTTCCT	Contig1471	98	27	25	19	27	44.898	-42.1	-42.9592	-0.956818	GGCTTTATCGTGGGGCCAACAACAGGTGAAACTGCCGCATGATCTGATCTTTCCTCAGCAAAGGAGGGAGGTTAAGATCATGCTGGCAGCTTCAACTGATACTGGCCCACGTAATTAACAAGAAGGCC	Contig891	128	36	30	34	28	50	-62.6	-48.9062	-0.978125
	bpe-miR167g.tgs.A1T	20	TAGCTGCCAGCATGATCTGA	TGGTCTTGTCGTGCACCACCAGCGGTTGAAGCTGCCAGCATGATCTGACGTCCTTTCCTCAGCACCCGATATATATATATATCCTGGAAAGAATAGATCATGTTGCAGTTTCACCTGCTGTTTGAAGCATGAGAAAACCA	Contig139	140	37	34	30	39	45.7143	-59.5	-42.5	-0.929688	CCACTAGCAGTTGAAGCTGCCAGCATGATCTAAACTTCCCTCTCGATTACTCAACGAAAGATCAGATCATGTTGGCAGCTTCACCTGGTGATGG	Contig1235	94	25	25	20	24	47.8723	-43.9	-46.7021	-0.975556	AGGAAAAAGTGAAGCTGCCAGCATGATCTAGCTTTGGTTAGAGATATCGATACTACTAACCCTTACTAGGTCATGCTCTGACAGCCTCACTCCTTCCT	Contig1471	98	27	25	19	27	44.898	-42.1	-42.9592	-0.956818	GGCTTTATCGTGGGGCCAACAACAGGTGAAACTGCCGCATGATCTGATCTTTCCTCAGCAAAGGAGGGAGGTTAAGATCATGCTGGCAGCTTCAACTGATACTGGCCCACGTAATTAACAAGAAGGCC	Contig891	128	36	30	34	28	50	-62.6	-48.9062	-0.978125
	bpe-miR167g.Gs.Ts.T1G.G2T.ga	22	GTGTAAGCTGCCAGCATGATCT	TGGTCTTGTCGTGCACCACCAGCGGTTGAAGCTGCCAGCATGATCTGACGTCCTTTCCTCAGCACCCGATATATATATATATCCTGGAAAGAATAGATCATGTTGCAGTTTCACCTGCTGTTTGAAGCATGAGAAAACCA	Contig139	140	37	34	30	39	45.7143	-59.5	-42.5	-0.929688	CCACTAGCAGTTGAAGCTGCCAGCATGATCTAAACTTCCCTCTCGATTACTCAACGAAAGATCAGATCATGTTGGCAGCTTCACCTGGTGATGG	Contig1235	94	25	25	20	24	47.8723	-43.9	-46.7021	-0.975556	AGGAAAAAGTGAAGCTGCCAGCATGATCTAGCTTTGGTTAGAGATATCGATACTACTAACCCTTACTAGGTCATGCTCTGACAGCCTCACTCCTTCCT	Contig1471	98	27	25	19	27	44.898	-42.1	-42.9592	-0.956818	GGCTTTATCGTGGGGCCAACAACAGGTGAAACTGCCGCATGATCTGATCTTTCCTCAGCAAAGGAGGGAGGTTAAGATCATGCTGGCAGCTTCAACTGATACTGGCCCACGTAATTAACAAGAAGGCC	Contig891	128	36	30	34	28	50	-62.6	-48.9062	-0.978125
	bpe-miR167g.Gs.Ts	24	GTTGAAGCTGCCAGCATGATCTGA	TGGTCTTGTCGTGCACCACCAGCGGTTGAAGCTGCCAGCATGATCTGACGTCCTTTCCTCAGCACCCGATATATATATATATCCTGGAAAGAATAGATCATGTTGCAGTTTCACCTGCTGTTTGAAGCATGAGAAAACCA	Contig139	140	37	34	30	39	45.7143	-59.5	-42.5	-0.929688	CCACTAGCAGTTGAAGCTGCCAGCATGATCTAAACTTCCCTCTCGATTACTCAACGAAAGATCAGATCATGTTGGCAGCTTCACCTGGTGATGG	Contig1235	94	25	25	20	24	47.8723	-43.9	-46.7021	-0.975556	AGGAAAAAGTGAAGCTGCCAGCATGATCTAGCTTTGGTTAGAGATATCGATACTACTAACCCTTACTAGGTCATGCTCTGACAGCCTCACTCCTTCCT	Contig1471	98	27	25	19	27	44.898	-42.1	-42.9592	-0.956818	GGCTTTATCGTGGGGCCAACAACAGGTGAAACTGCCGCATGATCTGATCTTTCCTCAGCAAAGGAGGGAGGTTAAGATCATGCTGGCAGCTTCAACTGATACTGGCCCACGTAATTAACAAGAAGGCC	Contig891	128	36	30	34	28	50	-62.6	-48.9062	-0.978125
	bpe-miR167g.Ts.T1G.ga	21	TGGAAGCTGCCAGCATGATCT	TGGTCTTGTCGTGCACCACCAGCGGTTGAAGCTGCCAGCATGATCTGACGTCCTTTCCTCAGCACCCGATATATATATATATCCTGGAAAGAATAGATCATGTTGCAGTTTCACCTGCTGTTTGAAGCATGAGAAAACCA	Contig139	140	37	34	30	39	45.7143	-59.5	-42.5	-0.929688	CCACTAGCAGTTGAAGCTGCCAGCATGATCTAAACTTCCCTCTCGATTACTCAACGAAAGATCAGATCATGTTGGCAGCTTCACCTGGTGATGG	Contig1235	94	25	25	20	24	47.8723	-43.9	-46.7021	-0.975556	AGGAAAAAGTGAAGCTGCCAGCATGATCTAGCTTTGGTTAGAGATATCGATACTACTAACCCTTACTAGGTCATGCTCTGACAGCCTCACTCCTTCCT	Contig1471	98	27	25	19	27	44.898	-42.1	-42.9592	-0.956818	GGCTTTATCGTGGGGCCAACAACAGGTGAAACTGCCGCATGATCTGATCTTTCCTCAGCAAAGGAGGGAGGTTAAGATCATGCTGGCAGCTTCAACTGATACTGGCCCACGTAATTAACAAGAAGGCC	Contig891	128	36	30	34	28	50	-62.6	-48.9062	-0.978125
	bpe-miR167g.Ts.T1G.G2C	23	TGCAAGCTGCCAGCATGATCTGA	TGGTCTTGTCGTGCACCACCAGCGGTTGAAGCTGCCAGCATGATCTGACGTCCTTTCCTCAGCACCCGATATATATATATATCCTGGAAAGAATAGATCATGTTGCAGTTTCACCTGCTGTTTGAAGCATGAGAAAACCA	Contig139	140	37	34	30	39	45.7143	-59.5	-42.5	-0.929688	CCACTAGCAGTTGAAGCTGCCAGCATGATCTAAACTTCCCTCTCGATTACTCAACGAAAGATCAGATCATGTTGGCAGCTTCACCTGGTGATGG	Contig1235	94	25	25	20	24	47.8723	-43.9	-46.7021	-0.975556	AGGAAAAAGTGAAGCTGCCAGCATGATCTAGCTTTGGTTAGAGATATCGATACTACTAACCCTTACTAGGTCATGCTCTGACAGCCTCACTCCTTCCT	Contig1471	98	27	25	19	27	44.898	-42.1	-42.9592	-0.956818	GGCTTTATCGTGGGGCCAACAACAGGTGAAACTGCCGCATGATCTGATCTTTCCTCAGCAAAGGAGGGAGGTTAAGATCATGCTGGCAGCTTCAACTGATACTGGCCCACGTAATTAACAAGAAGGCC	Contig891	128	36	30	34	28	50	-62.6	-48.9062	-0.978125
	bpe-miR167g.Ts.G2A.A22T	23	TTAAAGCTGCCAGCATGATCTGT	TGGTCTTGTCGTGCACCACCAGCGGTTGAAGCTGCCAGCATGATCTGACGTCCTTTCCTCAGCACCCGATATATATATATATCCTGGAAAGAATAGATCATGTTGCAGTTTCACCTGCTGTTTGAAGCATGAGAAAACCA	Contig139	140	37	34	30	39	45.7143	-59.5	-42.5	-0.929688	CCACTAGCAGTTGAAGCTGCCAGCATGATCTAAACTTCCCTCTCGATTACTCAACGAAAGATCAGATCATGTTGGCAGCTTCACCTGGTGATGG	Contig1235	94	25	25	20	24	47.8723	-43.9	-46.7021	-0.975556	AGGAAAAAGTGAAGCTGCCAGCATGATCTAGCTTTGGTTAGAGATATCGATACTACTAACCCTTACTAGGTCATGCTCTGACAGCCTCACTCCTTCCT	Contig1471	98	27	25	19	27	44.898	-42.1	-42.9592	-0.956818	GGCTTTATCGTGGGGCCAACAACAGGTGAAACTGCCGCATGATCTGATCTTTCCTCAGCAAAGGAGGGAGGTTAAGATCATGCTGGCAGCTTCAACTGATACTGGCCCACGTAATTAACAAGAAGGCC	Contig891	128	36	30	34	28	50	-62.6	-48.9062	-0.978125
	bpe-miR167g.Ts.T1G	23	TGGAAGCTGCCAGCATGATCTGA	TGGTCTTGTCGTGCACCACCAGCGGTTGAAGCTGCCAGCATGATCTGACGTCCTTTCCTCAGCACCCGATATATATATATATCCTGGAAAGAATAGATCATGTTGCAGTTTCACCTGCTGTTTGAAGCATGAGAAAACCA	Contig139	140	37	34	30	39	45.7143	-59.5	-42.5	-0.929688	CCACTAGCAGTTGAAGCTGCCAGCATGATCTAAACTTCCCTCTCGATTACTCAACGAAAGATCAGATCATGTTGGCAGCTTCACCTGGTGATGG	Contig1235	94	25	25	20	24	47.8723	-43.9	-46.7021	-0.975556	AGGAAAAAGTGAAGCTGCCAGCATGATCTAGCTTTGGTTAGAGATATCGATACTACTAACCCTTACTAGGTCATGCTCTGACAGCCTCACTCCTTCCT	Contig1471	98	27	25	19	27	44.898	-42.1	-42.9592	-0.956818	GGCTTTATCGTGGGGCCAACAACAGGTGAAACTGCCGCATGATCTGATCTTTCCTCAGCAAAGGAGGGAGGTTAAGATCATGCTGGCAGCTTCAACTGATACTGGCCCACGTAATTAACAAGAAGGCC	Contig891	128	36	30	34	28	50	-62.6	-48.9062	-0.978125
bpe-miR156a-5p	bpe-miR156a-5p	20	TGACAGAAGAGAGTGAGCAC	TTCCCTGGGACATAGAAATTGACAGAAGAGAGTGAGCACACAGAGGCCATATGGTATAAAGTCTATACTAATGCTTTTGCGTGCTCACTTCTCTTTCTGTCAGATTCCAGTCCCGGAGGAG	Contig511	121	33	26	29	33	48.7603	-65.4	-54.0496	-1.10847	GAAGCTGACAGAAAGAGAAGTGAGCACGCACTCGCAAAGGTATGCTCTCATACAATTGCCTGCAGCGTGTGCTCACTCTCTTCTGTCAGTCTC	Contig801	93	24	25	22	22	50.5376	-49.3	-53.0108	-1.04894	GGTAAGGGAGGTGACAGAAGAGAGTGAGCACACATGGTATTTCTTGCATGCCGTGTTTCATGCTTGAATCTCTGCGTGCTTACTCTCTATCTGTCGTCCCCACCGCC	Contig237	98	27	25	19	27	44.898	-42.1	-42.9592	-0.956818	GTACAGAAGAGAGTGAGCACACATGGTCTTTTTTCTTGCATGGACTGTCCACGCCTGAAGCTCTGCGTGCTTGCTCTCTATCTGTCAC	Contig51	88	17	23	21	27	50	-37.9	-43.0682	-0.861364	GCTCTCTCTCTTCTGTCATAGATTATCTTCATGAGATTTGAAATGGATGAGAGAAGAATCTATGTTGAAGAGGAGGAAGAG	Contig2838
	bpe-miR156a-5p.c	19	TGACAGAAGAGAGTGAGCA	TTCCCTGGGACATAGAAATTGACAGAAGAGAGTGAGCACACAGAGGCCATATGGTATAAAGTCTATACTAATGCTTTTGCGTGCTCACTTCTCTTTCTGTCAGATTCCAGTCCCGGAGGAG	Contig511	121	33	26	29	33	48.7603	-65.4	-54.0496	-1.10847	GAAGCTGACAGAAAGAGAAGTGAGCACGCACTCGCAAAGGTATGCTCTCATACAATTGCCTGCAGCGTGTGCTCACTCTCTTCTGTCAGTCTC	Contig801	93	24	25	22	22	50.5376	-49.3	-53.0108	-1.04894	GGTAAGGGAGGTGACAGAAGAGAGTGAGCACACATGGTATTTCTTGCATGCCGTGTTTCATGCTTGAATCTCTGCGTGCTTACTCTCTATCTGTCGTCCCCACCGCC	Contig237	98	27	25	19	27	44.898	-42.1	-42.9592	-0.956818	GTACAGAAGAGAGTGAGCACACATGGTCTTTTTTCTTGCATGGACTGTCCACGCCTGAAGCTCTGCGTGCTTGCTCTCTATCTGTCAC	Contig51	88	17	23	21	27	50	-37.9	-43.0682	-0.861364	GCTCTCTCTCTTCTGTCATAGATTATCTTCATGAGATTTGAAATGGATGAGAGAAGAATCTATGTTGAAGAGGAGGAAGAG	Contig2838
	bpe-miR156a-5p.ac	18	TGACAGAAGAGAGTGAGC	TTCCCTGGGACATAGAAATTGACAGAAGAGAGTGAGCACACAGAGGCCATATGGTATAAAGTCTATACTAATGCTTTTGCGTGCTCACTTCTCTTTCTGTCAGATTCCAGTCCCGGAGGAG	Contig511	121	33	26	29	33	48.7603	-65.4	-54.0496	-1.10847	GAAGCTGACAGAAAGAGAAGTGAGCACGCACTCGCAAAGGTATGCTCTCATACAATTGCCTGCAGCGTGTGCTCACTCTCTTCTGTCAGTCTC	Contig801	93	24	25	22	22	50.5376	-49.3	-53.0108	-1.04894	GGTAAGGGAGGTGACAGAAGAGAGTGAGCACACATGGTATTTCTTGCATGCCGTGTTTCATGCTTGAATCTCTGCGTGCTTACTCTCTATCTGTCGTCCCCACCGCC	Contig237	98	27	25	19	27	44.898	-42.1	-42.9592	-0.956818	GTACAGAAGAGAGTGAGCACACATGGTCTTTTTTCTTGCATGGACTGTCCACGCCTGAAGCTCTGCGTGCTTGCTCTCTATCTGTCAC	Contig51	88	17	23	21	27	50	-37.9	-43.0682	-0.861364	GCTCTCTCTCTTCTGTCATAGATTATCTTCATGAGATTTGAAATGGATGAGAGAAGAATCTATGTTGAAGAGGAGGAAGAG	Contig2838
	bpe-miR156a-5p.A	21	TGACAGAAGAGAGTGAGCACA	TTCCCTGGGACATAGAAATTGACAGAAGAGAGTGAGCACACAGAGGCCATATGGTATAAAGTCTATACTAATGCTTTTGCGTGCTCACTTCTCTTTCTGTCAGATTCCAGTCCCGGAGGAG	Contig511	121	33	26	29	33	48.7603	-65.4	-54.0496	-1.10847	GAAGCTGACAGAAAGAGAAGTGAGCACGCACTCGCAAAGGTATGCTCTCATACAATTGCCTGCAGCGTGTGCTCACTCTCTTCTGTCAGTCTC	Contig801	93	24	25	22	22	50.5376	-49.3	-53.0108	-1.04894	GGTAAGGGAGGTGACAGAAGAGAGTGAGCACACATGGTATTTCTTGCATGCCGTGTTTCATGCTTGAATCTCTGCGTGCTTACTCTCTATCTGTCGTCCCCACCGCC	Contig237	98	27	25	19	27	44.898	-42.1	-42.9592	-0.956818	GTACAGAAGAGAGTGAGCACACATGGTCTTTTTTCTTGCATGGACTGTCCACGCCTGAAGCTCTGCGTGCTTGCTCTCTATCTGTCAC	Contig51	88	17	23	21	27	50	-37.9	-43.0682	-0.861364	GCTCTCTCTCTTCTGTCATAGATTATCTTCATGAGATTTGAAATGGATGAGAGAAGAATCTATGTTGAAGAGGAGGAAGAG	Contig2838
	bpe-miR156a-5p.C	21	TGACAGAAGAGAGTGAGCACC	TTCCCTGGGACATAGAAATTGACAGAAGAGAGTGAGCACACAGAGGCCATATGGTATAAAGTCTATACTAATGCTTTTGCGTGCTCACTTCTCTTTCTGTCAGATTCCAGTCCCGGAGGAG	Contig511	121	33	26	29	33	48.7603	-65.4	-54.0496	-1.10847	GAAGCTGACAGAAAGAGAAGTGAGCACGCACTCGCAAAGGTATGCTCTCATACAATTGCCTGCAGCGTGTGCTCACTCTCTTCTGTCAGTCTC	Contig801	93	24	25	22	22	50.5376	-49.3	-53.0108	-1.04894	GGTAAGGGAGGTGACAGAAGAGAGTGAGCACACATGGTATTTCTTGCATGCCGTGTTTCATGCTTGAATCTCTGCGTGCTTACTCTCTATCTGTCGTCCCCACCGCC	Contig237	98	27	25	19	27	44.898	-42.1	-42.9592	-0.956818	GTACAGAAGAGAGTGAGCACACATGGTCTTTTTTCTTGCATGGACTGTCCACGCCTGAAGCTCTGCGTGCTTGCTCTCTATCTGTCAC	Contig51	88	17	23	21	27	50	-37.9	-43.0682	-0.861364	GCTCTCTCTCTTCTGTCATAGATTATCTTCATGAGATTTGAAATGGATGAGAGAAGAATCTATGTTGAAGAGGAGGAAGAG	Contig2838
	bpe-miR156a-5p.ts	19	GACAGAAGAGAGTGAGCAC	TTCCCTGGGACATAGAAATTGACAGAAGAGAGTGAGCACACAGAGGCCATATGGTATAAAGTCTATACTAATGCTTTTGCGTGCTCACTTCTCTTTCTGTCAGATTCCAGTCCCGGAGGAG	Contig511	121	33	26	29	33	48.7603	-65.4	-54.0496	-1.10847	GAAGCTGACAGAAAGAGAAGTGAGCACGCACTCGCAAAGGTATGCTCTCATACAATTGCCTGCAGCGTGTGCTCACTCTCTTCTGTCAGTCTC	Contig801	93	24	25	22	22	50.5376	-49.3	-53.0108	-1.04894	GGTAAGGGAGGTGACAGAAGAGAGTGAGCACACATGGTATTTCTTGCATGCCGTGTTTCATGCTTGAATCTCTGCGTGCTTACTCTCTATCTGTCGTCCCCACCGCC	Contig237	98	27	25	19	27	44.898	-42.1	-42.9592	-0.956818	GTACAGAAGAGAGTGAGCACACATGGTCTTTTTTCTTGCATGGACTGTCCACGCCTGAAGCTCTGCGTGCTTGCTCTCTATCTGTCAC	Contig51	88	17	23	21	27	50	-37.9	-43.0682	-0.861364	GCTCTCTCTCTTCTGTCATAGATTATCTTCATGAGATTTGAAATGGATGAGAGAAGAATCTATGTTGAAGAGGAGGAAGAG	Contig2838
	bpe-miR156a-5p.Gs	21	GTGACAGAAGAGAGTGAGCAC	TTCCCTGGGACATAGAAATTGACAGAAGAGAGTGAGCACACAGAGGCCATATGGTATAAAGTCTATACTAATGCTTTTGCGTGCTCACTTCTCTTTCTGTCAGATTCCAGTCCCGGAGGAG	Contig511	121	33	26	29	33	48.7603	-65.4	-54.0496	-1.10847	GAAGCTGACAGAAAGAGAAGTGAGCACGCACTCGCAAAGGTATGCTCTCATACAATTGCCTGCAGCGTGTGCTCACTCTCTTCTGTCAGTCTC	Contig801	93	24	25	22	22	50.5376	-49.3	-53.0108	-1.04894	GGTAAGGGAGGTGACAGAAGAGAGTGAGCACACATGGTATTTCTTGCATGCCGTGTTTCATGCTTGAATCTCTGCGTGCTTACTCTCTATCTGTCGTCCCCACCGCC	Contig237	98	27	25	19	27	44.898	-42.1	-42.9592	-0.956818	GTACAGAAGAGAGTGAGCACACATGGTCTTTTTTCTTGCATGGACTGTCCACGCCTGAAGCTCTGCGTGCTTGCTCTCTATCTGTCAC	Contig51	88	17	23	21	27	50	-37.9	-43.0682	-0.861364	GCTCTCTCTCTTCTGTCATAGATTATCTTCATGAGATTTGAAATGGATGAGAGAAGAATCTATGTTGAAGAGGAGGAAGAG	Contig2838
	bpe-miR156a-5p.C20G.C	21	TGACAGAAGAGAGTGAGCAGC	TTCCCTGGGACATAGAAATTGACAGAAGAGAGTGAGCACACAGAGGCCATATGGTATAAAGTCTATACTAATGCTTTTGCGTGCTCACTTCTCTTTCTGTCAGATTCCAGTCCCGGAGGAG	Contig511	121	33	26	29	33	48.7603	-65.4	-54.0496	-1.10847	GAAGCTGACAGAAAGAGAAGTGAGCACGCACTCGCAAAGGTATGCTCTCATACAATTGCCTGCAGCGTGTGCTCACTCTCTTCTGTCAGTCTC	Contig801	93	24	25	22	22	50.5376	-49.3	-53.0108	-1.04894	GGTAAGGGAGGTGACAGAAGAGAGTGAGCACACATGGTATTTCTTGCATGCCGTGTTTCATGCTTGAATCTCTGCGTGCTTACTCTCTATCTGTCGTCCCCACCGCC	Contig237	98	27	25	19	27	44.898	-42.1	-42.9592	-0.956818	GTACAGAAGAGAGTGAGCACACATGGTCTTTTTTCTTGCATGGACTGTCCACGCCTGAAGCTCTGCGTGCTTGCTCTCTATCTGTCAC	Contig51	88	17	23	21	27	50	-37.9	-43.0682	-0.861364	GCTCTCTCTCTTCTGTCATAGATTATCTTCATGAGATTTGAAATGGATGAGAGAAGAATCTATGTTGAAGAGGAGGAAGAG	Contig2838
	bpe-miR156a-5p.CC	22	TGACAGAAGAGAGTGAGCACCC	TTCCCTGGGACATAGAAATTGACAGAAGAGAGTGAGCACACAGAGGCCATATGGTATAAAGTCTATACTAATGCTTTTGCGTGCTCACTTCTCTTTCTGTCAGATTCCAGTCCCGGAGGAG	Contig511	121	33	26	29	33	48.7603	-65.4	-54.0496	-1.10847	GAAGCTGACAGAAAGAGAAGTGAGCACGCACTCGCAAAGGTATGCTCTCATACAATTGCCTGCAGCGTGTGCTCACTCTCTTCTGTCAGTCTC	Contig801	93	24	25	22	22	50.5376	-49.3	-53.0108	-1.04894	GGTAAGGGAGGTGACAGAAGAGAGTGAGCACACATGGTATTTCTTGCATGCCGTGTTTCATGCTTGAATCTCTGCGTGCTTACTCTCTATCTGTCGTCCCCACCGCC	Contig237	98	27	25	19	27	44.898	-42.1	-42.9592	-0.956818	GTACAGAAGAGAGTGAGCACACATGGTCTTTTTTCTTGCATGGACTGTCCACGCCTGAAGCTCTGCGTGCTTGCTCTCTATCTGTCAC	Contig51	88	17	23	21	27	50	-37.9	-43.0682	-0.861364	GCTCTCTCTCTTCTGTCATAGATTATCTTCATGAGATTTGAAATGGATGAGAGAAGAATCTATGTTGAAGAGGAGGAAGAG	Contig2838
	bpe-miR156a-5p.Gs.c	20	GTGACAGAAGAGAGTGAGCA	TTCCCTGGGACATAGAAATTGACAGAAGAGAGTGAGCACACAGAGGCCATATGGTATAAAGTCTATACTAATGCTTTTGCGTGCTCACTTCTCTTTCTGTCAGATTCCAGTCCCGGAGGAG	Contig511	121	33	26	29	33	48.7603	-65.4	-54.0496	-1.10847	GAAGCTGACAGAAAGAGAAGTGAGCACGCACTCGCAAAGGTATGCTCTCATACAATTGCCTGCAGCGTGTGCTCACTCTCTTCTGTCAGTCTC	Contig801	93	24	25	22	22	50.5376	-49.3	-53.0108	-1.04894	GGTAAGGGAGGTGACAGAAGAGAGTGAGCACACATGGTATTTCTTGCATGCCGTGTTTCATGCTTGAATCTCTGCGTGCTTACTCTCTATCTGTCGTCCCCACCGCC	Contig237	98	27	25	19	27	44.898	-42.1	-42.9592	-0.956818	GTACAGAAGAGAGTGAGCACACATGGTCTTTTTTCTTGCATGGACTGTCCACGCCTGAAGCTCTGCGTGCTTGCTCTCTATCTGTCAC	Contig51	88	17	23	21	27	50	-37.9	-43.0682	-0.861364	GCTCTCTCTCTTCTGTCATAGATTATCTTCATGAGATTTGAAATGGATGAGAGAAGAATCTATGTTGAAGAGGAGGAAGAG	Contig2838
	bpe-miR156a-5p.Ts.T	22	TTGACAGAAGAGAGTGAGCACT	TTCCCTGGGACATAGAAATTGACAGAAGAGAGTGAGCACACAGAGGCCATATGGTATAAAGTCTATACTAATGCTTTTGCGTGCTCACTTCTCTTTCTGTCAGATTCCAGTCCCGGAGGAG	Contig511	121	33	26	29	33	48.7603	-65.4	-54.0496	-1.10847	GAAGCTGACAGAAAGAGAAGTGAGCACGCACTCGCAAAGGTATGCTCTCATACAATTGCCTGCAGCGTGTGCTCACTCTCTTCTGTCAGTCTC	Contig801	93	24	25	22	22	50.5376	-49.3	-53.0108	-1.04894	GGTAAGGGAGGTGACAGAAGAGAGTGAGCACACATGGTATTTCTTGCATGCCGTGTTTCATGCTTGAATCTCTGCGTGCTTACTCTCTATCTGTCGTCCCCACCGCC	Contig237	98	27	25	19	27	44.898	-42.1	-42.9592	-0.956818	GTACAGAAGAGAGTGAGCACACATGGTCTTTTTTCTTGCATGGACTGTCCACGCCTGAAGCTCTGCGTGCTTGCTCTCTATCTGTCAC	Contig51	88	17	23	21	27	50	-37.9	-43.0682	-0.861364	GCTCTCTCTCTTCTGTCATAGATTATCTTCATGAGATTTGAAATGGATGAGAGAAGAATCTATGTTGAAGAGGAGGAAGAG	Contig2838
	bpe-miR156a-5p.A19G.C20A.C	21	TGACAGAAGAGAGTGAGCGAC	TTCCCTGGGACATAGAAATTGACAGAAGAGAGTGAGCACACAGAGGCCATATGGTATAAAGTCTATACTAATGCTTTTGCGTGCTCACTTCTCTTTCTGTCAGATTCCAGTCCCGGAGGAG	Contig511	121	33	26	29	33	48.7603	-65.4	-54.0496	-1.10847	GAAGCTGACAGAAAGAGAAGTGAGCACGCACTCGCAAAGGTATGCTCTCATACAATTGCCTGCAGCGTGTGCTCACTCTCTTCTGTCAGTCTC	Contig801	93	24	25	22	22	50.5376	-49.3	-53.0108	-1.04894	GGTAAGGGAGGTGACAGAAGAGAGTGAGCACACATGGTATTTCTTGCATGCCGTGTTTCATGCTTGAATCTCTGCGTGCTTACTCTCTATCTGTCGTCCCCACCGCC	Contig237	98	27	25	19	27	44.898	-42.1	-42.9592	-0.956818	GTACAGAAGAGAGTGAGCACACATGGTCTTTTTTCTTGCATGGACTGTCCACGCCTGAAGCTCTGCGTGCTTGCTCTCTATCTGTCAC	Contig51	88	17	23	21	27	50	-37.9	-43.0682	-0.861364	GCTCTCTCTCTTCTGTCATAGATTATCTTCATGAGATTTGAAATGGATGAGAGAAGAATCTATGTTGAAGAGGAGGAAGAG	Contig2838
	bpe-miR156a-5p.A19C.C20A.C	21	TGACAGAAGAGAGTGAGCCAC	TTCCCTGGGACATAGAAATTGACAGAAGAGAGTGAGCACACAGAGGCCATATGGTATAAAGTCTATACTAATGCTTTTGCGTGCTCACTTCTCTTTCTGTCAGATTCCAGTCCCGGAGGAG	Contig511	121	33	26	29	33	48.7603	-65.4	-54.0496	-1.10847	GAAGCTGACAGAAAGAGAAGTGAGCACGCACTCGCAAAGGTATGCTCTCATACAATTGCCTGCAGCGTGTGCTCACTCTCTTCTGTCAGTCTC	Contig801	93	24	25	22	22	50.5376	-49.3	-53.0108	-1.04894	GGTAAGGGAGGTGACAGAAGAGAGTGAGCACACATGGTATTTCTTGCATGCCGTGTTTCATGCTTGAATCTCTGCGTGCTTACTCTCTATCTGTCGTCCCCACCGCC	Contig237	98	27	25	19	27	44.898	-42.1	-42.9592	-0.956818	GTACAGAAGAGAGTGAGCACACATGGTCTTTTTTCTTGCATGGACTGTCCACGCCTGAAGCTCTGCGTGCTTGCTCTCTATCTGTCAC	Contig51	88	17	23	21	27	50	-37.9	-43.0682	-0.861364	GCTCTCTCTCTTCTGTCATAGATTATCTTCATGAGATTTGAAATGGATGAGAGAAGAATCTATGTTGAAGAGGAGGAAGAG	Contig2838
	bpe-miR156a-5p.GA	22	TGACAGAAGAGAGTGAGCACGA	TTCCCTGGGACATAGAAATTGACAGAAGAGAGTGAGCACACAGAGGCCATATGGTATAAAGTCTATACTAATGCTTTTGCGTGCTCACTTCTCTTTCTGTCAGATTCCAGTCCCGGAGGAG	Contig511	121	33	26	29	33	48.7603	-65.4	-54.0496	-1.10847	GAAGCTGACAGAAAGAGAAGTGAGCACGCACTCGCAAAGGTATGCTCTCATACAATTGCCTGCAGCGTGTGCTCACTCTCTTCTGTCAGTCTC	Contig801	93	24	25	22	22	50.5376	-49.3	-53.0108	-1.04894	GGTAAGGGAGGTGACAGAAGAGAGTGAGCACACATGGTATTTCTTGCATGCCGTGTTTCATGCTTGAATCTCTGCGTGCTTACTCTCTATCTGTCGTCCCCACCGCC	Contig237	98	27	25	19	27	44.898	-42.1	-42.9592	-0.956818	GTACAGAAGAGAGTGAGCACACATGGTCTTTTTTCTTGCATGGACTGTCCACGCCTGAAGCTCTGCGTGCTTGCTCTCTATCTGTCAC	Contig51	88	17	23	21	27	50	-37.9	-43.0682	-0.861364	GCTCTCTCTCTTCTGTCATAGATTATCTTCATGAGATTTGAAATGGATGAGAGAAGAATCTATGTTGAAGAGGAGGAAGAG	Contig2838
	bpe-miR156a-5p.tgs	18	ACAGAAGAGAGTGAGCAC	TTCCCTGGGACATAGAAATTGACAGAAGAGAGTGAGCACACAGAGGCCATATGGTATAAAGTCTATACTAATGCTTTTGCGTGCTCACTTCTCTTTCTGTCAGATTCCAGTCCCGGAGGAG	Contig511	121	33	26	29	33	48.7603	-65.4	-54.0496	-1.10847	GAAGCTGACAGAAAGAGAAGTGAGCACGCACTCGCAAAGGTATGCTCTCATACAATTGCCTGCAGCGTGTGCTCACTCTCTTCTGTCAGTCTC	Contig801	93	24	25	22	22	50.5376	-49.3	-53.0108	-1.04894	GGTAAGGGAGGTGACAGAAGAGAGTGAGCACACATGGTATTTCTTGCATGCCGTGTTTCATGCTTGAATCTCTGCGTGCTTACTCTCTATCTGTCGTCCCCACCGCC	Contig237	98	27	25	19	27	44.898	-42.1	-42.9592	-0.956818	GTACAGAAGAGAGTGAGCACACATGGTCTTTTTTCTTGCATGGACTGTCCACGCCTGAAGCTCTGCGTGCTTGCTCTCTATCTGTCAC	Contig51	88	17	23	21	27	50	-37.9	-43.0682	-0.861364	GCTCTCTCTCTTCTGTCATAGATTATCTTCATGAGATTTGAAATGGATGAGAGAAGAATCTATGTTGAAGAGGAGGAAGAG	Contig2838
	bpe-miR156a-5p.ACs.ac	20	ACTGACAGAAGAGAGTGAGC	TTCCCTGGGACATAGAAATTGACAGAAGAGAGTGAGCACACAGAGGCCATATGGTATAAAGTCTATACTAATGCTTTTGCGTGCTCACTTCTCTTTCTGTCAGATTCCAGTCCCGGAGGAG	Contig511	121	33	26	29	33	48.7603	-65.4	-54.0496	-1.10847	GAAGCTGACAGAAAGAGAAGTGAGCACGCACTCGCAAAGGTATGCTCTCATACAATTGCCTGCAGCGTGTGCTCACTCTCTTCTGTCAGTCTC	Contig801	93	24	25	22	22	50.5376	-49.3	-53.0108	-1.04894	GGTAAGGGAGGTGACAGAAGAGAGTGAGCACACATGGTATTTCTTGCATGCCGTGTTTCATGCTTGAATCTCTGCGTGCTTACTCTCTATCTGTCGTCCCCACCGCC	Contig237	98	27	25	19	27	44.898	-42.1	-42.9592	-0.956818	GTACAGAAGAGAGTGAGCACACATGGTCTTTTTTCTTGCATGGACTGTCCACGCCTGAAGCTCTGCGTGCTTGCTCTCTATCTGTCAC	Contig51	88	17	23	21	27	50	-37.9	-43.0682	-0.861364	GCTCTCTCTCTTCTGTCATAGATTATCTTCATGAGATTTGAAATGGATGAGAGAAGAATCTATGTTGAAGAGGAGGAAGAG	Contig2838
	bpe-miR156a-5p.Gs.ac	19	GTGACAGAAGAGAGTGAGC	TTCCCTGGGACATAGAAATTGACAGAAGAGAGTGAGCACACAGAGGCCATATGGTATAAAGTCTATACTAATGCTTTTGCGTGCTCACTTCTCTTTCTGTCAGATTCCAGTCCCGGAGGAG	Contig511	121	33	26	29	33	48.7603	-65.4	-54.0496	-1.10847	GAAGCTGACAGAAAGAGAAGTGAGCACGCACTCGCAAAGGTATGCTCTCATACAATTGCCTGCAGCGTGTGCTCACTCTCTTCTGTCAGTCTC	Contig801	93	24	25	22	22	50.5376	-49.3	-53.0108	-1.04894	GGTAAGGGAGGTGACAGAAGAGAGTGAGCACACATGGTATTTCTTGCATGCCGTGTTTCATGCTTGAATCTCTGCGTGCTTACTCTCTATCTGTCGTCCCCACCGCC	Contig237	98	27	25	19	27	44.898	-42.1	-42.9592	-0.956818	GTACAGAAGAGAGTGAGCACACATGGTCTTTTTTCTTGCATGGACTGTCCACGCCTGAAGCTCTGCGTGCTTGCTCTCTATCTGTCAC	Contig51	88	17	23	21	27	50	-37.9	-43.0682	-0.861364	GCTCTCTCTCTTCTGTCATAGATTATCTTCATGAGATTTGAAATGGATGAGAGAAGAATCTATGTTGAAGAGGAGGAAGAG	Contig2838
	bpe-miR156a-5p.Cs	21	CTGACAGAAGAGAGTGAGCAC	TTCCCTGGGACATAGAAATTGACAGAAGAGAGTGAGCACACAGAGGCCATATGGTATAAAGTCTATACTAATGCTTTTGCGTGCTCACTTCTCTTTCTGTCAGATTCCAGTCCCGGAGGAG	Contig511	121	33	26	29	33	48.7603	-65.4	-54.0496	-1.10847	GAAGCTGACAGAAAGAGAAGTGAGCACGCACTCGCAAAGGTATGCTCTCATACAATTGCCTGCAGCGTGTGCTCACTCTCTTCTGTCAGTCTC	Contig801	93	24	25	22	22	50.5376	-49.3	-53.0108	-1.04894	GGTAAGGGAGGTGACAGAAGAGAGTGAGCACACATGGTATTTCTTGCATGCCGTGTTTCATGCTTGAATCTCTGCGTGCTTACTCTCTATCTGTCGTCCCCACCGCC	Contig237	98	27	25	19	27	44.898	-42.1	-42.9592	-0.956818	GTACAGAAGAGAGTGAGCACACATGGTCTTTTTTCTTGCATGGACTGTCCACGCCTGAAGCTCTGCGTGCTTGCTCTCTATCTGTCAC	Contig51	88	17	23	21	27	50	-37.9	-43.0682	-0.861364	GCTCTCTCTCTTCTGTCATAGATTATCTTCATGAGATTTGAAATGGATGAGAGAAGAATCTATGTTGAAGAGGAGGAAGAG	Contig2838
	bpe-miR156a-5p.C20G.C.T	22	TGACAGAAGAGAGTGAGCAGCT	TTCCCTGGGACATAGAAATTGACAGAAGAGAGTGAGCACACAGAGGCCATATGGTATAAAGTCTATACTAATGCTTTTGCGTGCTCACTTCTCTTTCTGTCAGATTCCAGTCCCGGAGGAG	Contig511	121	33	26	29	33	48.7603	-65.4	-54.0496	-1.10847	GAAGCTGACAGAAAGAGAAGTGAGCACGCACTCGCAAAGGTATGCTCTCATACAATTGCCTGCAGCGTGTGCTCACTCTCTTCTGTCAGTCTC	Contig801	93	24	25	22	22	50.5376	-49.3	-53.0108	-1.04894	GGTAAGGGAGGTGACAGAAGAGAGTGAGCACACATGGTATTTCTTGCATGCCGTGTTTCATGCTTGAATCTCTGCGTGCTTACTCTCTATCTGTCGTCCCCACCGCC	Contig237	98	27	25	19	27	44.898	-42.1	-42.9592	-0.956818	GTACAGAAGAGAGTGAGCACACATGGTCTTTTTTCTTGCATGGACTGTCCACGCCTGAAGCTCTGCGTGCTTGCTCTCTATCTGTCAC	Contig51	88	17	23	21	27	50	-37.9	-43.0682	-0.861364	GCTCTCTCTCTTCTGTCATAGATTATCTTCATGAGATTTGAAATGGATGAGAGAAGAATCTATGTTGAAGAGGAGGAAGAG	Contig2838
	bpe-miR156a-5p.G11T	20	TGACAGAAGATAGTGAGCAC	TTCCCTGGGACATAGAAATTGACAGAAGAGAGTGAGCACACAGAGGCCATATGGTATAAAGTCTATACTAATGCTTTTGCGTGCTCACTTCTCTTTCTGTCAGATTCCAGTCCCGGAGGAG	Contig511	121	33	26	29	33	48.7603	-65.4	-54.0496	-1.10847	GAAGCTGACAGAAAGAGAAGTGAGCACGCACTCGCAAAGGTATGCTCTCATACAATTGCCTGCAGCGTGTGCTCACTCTCTTCTGTCAGTCTC	Contig801	93	24	25	22	22	50.5376	-49.3	-53.0108	-1.04894	GGTAAGGGAGGTGACAGAAGAGAGTGAGCACACATGGTATTTCTTGCATGCCGTGTTTCATGCTTGAATCTCTGCGTGCTTACTCTCTATCTGTCGTCCCCACCGCC	Contig237	98	27	25	19	27	44.898	-42.1	-42.9592	-0.956818	GTACAGAAGAGAGTGAGCACACATGGTCTTTTTTCTTGCATGGACTGTCCACGCCTGAAGCTCTGCGTGCTTGCTCTCTATCTGTCAC	Contig51	88	17	23	21	27	50	-37.9	-43.0682	-0.861364	GCTCTCTCTCTTCTGTCATAGATTATCTTCATGAGATTTGAAATGGATGAGAGAAGAATCTATGTTGAAGAGGAGGAAGAG	Contig2838
	bpe-miR156a-5p.A19T.c	19	TGACAGAAGAGAGTGAGCT	TTCCCTGGGACATAGAAATTGACAGAAGAGAGTGAGCACACAGAGGCCATATGGTATAAAGTCTATACTAATGCTTTTGCGTGCTCACTTCTCTTTCTGTCAGATTCCAGTCCCGGAGGAG	Contig511	121	33	26	29	33	48.7603	-65.4	-54.0496	-1.10847	GAAGCTGACAGAAAGAGAAGTGAGCACGCACTCGCAAAGGTATGCTCTCATACAATTGCCTGCAGCGTGTGCTCACTCTCTTCTGTCAGTCTC	Contig801	93	24	25	22	22	50.5376	-49.3	-53.0108	-1.04894	GGTAAGGGAGGTGACAGAAGAGAGTGAGCACACATGGTATTTCTTGCATGCCGTGTTTCATGCTTGAATCTCTGCGTGCTTACTCTCTATCTGTCGTCCCCACCGCC	Contig237	98	27	25	19	27	44.898	-42.1	-42.9592	-0.956818	GTACAGAAGAGAGTGAGCACACATGGTCTTTTTTCTTGCATGGACTGTCCACGCCTGAAGCTCTGCGTGCTTGCTCTCTATCTGTCAC	Contig51	88	17	23	21	27	50	-37.9	-43.0682	-0.861364	GCTCTCTCTCTTCTGTCATAGATTATCTTCATGAGATTTGAAATGGATGAGAGAAGAATCTATGTTGAAGAGGAGGAAGAG	Contig2838
	bpe-miR156a-5p.AT	22	TGACAGAAGAGAGTGAGCACAT	TTCCCTGGGACATAGAAATTGACAGAAGAGAGTGAGCACACAGAGGCCATATGGTATAAAGTCTATACTAATGCTTTTGCGTGCTCACTTCTCTTTCTGTCAGATTCCAGTCCCGGAGGAG	Contig511	121	33	26	29	33	48.7603	-65.4	-54.0496	-1.10847	GAAGCTGACAGAAAGAGAAGTGAGCACGCACTCGCAAAGGTATGCTCTCATACAATTGCCTGCAGCGTGTGCTCACTCTCTTCTGTCAGTCTC	Contig801	93	24	25	22	22	50.5376	-49.3	-53.0108	-1.04894	GGTAAGGGAGGTGACAGAAGAGAGTGAGCACACATGGTATTTCTTGCATGCCGTGTTTCATGCTTGAATCTCTGCGTGCTTACTCTCTATCTGTCGTCCCCACCGCC	Contig237	98	27	25	19	27	44.898	-42.1	-42.9592	-0.956818	GTACAGAAGAGAGTGAGCACACATGGTCTTTTTTCTTGCATGGACTGTCCACGCCTGAAGCTCTGCGTGCTTGCTCTCTATCTGTCAC	Contig51	88	17	23	21	27	50	-37.9	-43.0682	-0.861364	GCTCTCTCTCTTCTGTCATAGATTATCTTCATGAGATTTGAAATGGATGAGAGAAGAATCTATGTTGAAGAGGAGGAAGAG	Contig2838
	bpe-miR156a-5p.TC	22	TGACAGAAGAGAGTGAGCACTC	TTCCCTGGGACATAGAAATTGACAGAAGAGAGTGAGCACACAGAGGCCATATGGTATAAAGTCTATACTAATGCTTTTGCGTGCTCACTTCTCTTTCTGTCAGATTCCAGTCCCGGAGGAG	Contig511	121	33	26	29	33	48.7603	-65.4	-54.0496	-1.10847	GAAGCTGACAGAAAGAGAAGTGAGCACGCACTCGCAAAGGTATGCTCTCATACAATTGCCTGCAGCGTGTGCTCACTCTCTTCTGTCAGTCTC	Contig801	93	24	25	22	22	50.5376	-49.3	-53.0108	-1.04894	GGTAAGGGAGGTGACAGAAGAGAGTGAGCACACATGGTATTTCTTGCATGCCGTGTTTCATGCTTGAATCTCTGCGTGCTTACTCTCTATCTGTCGTCCCCACCGCC	Contig237	98	27	25	19	27	44.898	-42.1	-42.9592	-0.956818	GTACAGAAGAGAGTGAGCACACATGGTCTTTTTTCTTGCATGGACTGTCCACGCCTGAAGCTCTGCGTGCTTGCTCTCTATCTGTCAC	Contig51	88	17	23	21	27	50	-37.9	-43.0682	-0.861364	GCTCTCTCTCTTCTGTCATAGATTATCTTCATGAGATTTGAAATGGATGAGAGAAGAATCTATGTTGAAGAGGAGGAAGAG	Contig2838
	bpe-miR156a-5p.G	21	TGACAGAAGAGAGTGAGCACG	TTCCCTGGGACATAGAAATTGACAGAAGAGAGTGAGCACACAGAGGCCATATGGTATAAAGTCTATACTAATGCTTTTGCGTGCTCACTTCTCTTTCTGTCAGATTCCAGTCCCGGAGGAG	Contig511	121	33	26	29	33	48.7603	-65.4	-54.0496	-1.10847	GAAGCTGACAGAAAGAGAAGTGAGCACGCACTCGCAAAGGTATGCTCTCATACAATTGCCTGCAGCGTGTGCTCACTCTCTTCTGTCAGTCTC	Contig801	93	24	25	22	22	50.5376	-49.3	-53.0108	-1.04894	GGTAAGGGAGGTGACAGAAGAGAGTGAGCACACATGGTATTTCTTGCATGCCGTGTTTCATGCTTGAATCTCTGCGTGCTTACTCTCTATCTGTCGTCCCCACCGCC	Contig237	98	27	25	19	27	44.898	-42.1	-42.9592	-0.956818	GTACAGAAGAGAGTGAGCACACATGGTCTTTTTTCTTGCATGGACTGTCCACGCCTGAAGCTCTGCGTGCTTGCTCTCTATCTGTCAC	Contig51	88	17	23	21	27	50	-37.9	-43.0682	-0.861364	GCTCTCTCTCTTCTGTCATAGATTATCTTCATGAGATTTGAAATGGATGAGAGAAGAATCTATGTTGAAGAGGAGGAAGAG	Contig2838
	bpe-miR156a-5p.A19T.C20A.C	21	TGACAGAAGAGAGTGAGCTAC	TTCCCTGGGACATAGAAATTGACAGAAGAGAGTGAGCACACAGAGGCCATATGGTATAAAGTCTATACTAATGCTTTTGCGTGCTCACTTCTCTTTCTGTCAGATTCCAGTCCCGGAGGAG	Contig511	121	33	26	29	33	48.7603	-65.4	-54.0496	-1.10847	GAAGCTGACAGAAAGAGAAGTGAGCACGCACTCGCAAAGGTATGCTCTCATACAATTGCCTGCAGCGTGTGCTCACTCTCTTCTGTCAGTCTC	Contig801	93	24	25	22	22	50.5376	-49.3	-53.0108	-1.04894	GGTAAGGGAGGTGACAGAAGAGAGTGAGCACACATGGTATTTCTTGCATGCCGTGTTTCATGCTTGAATCTCTGCGTGCTTACTCTCTATCTGTCGTCCCCACCGCC	Contig237	98	27	25	19	27	44.898	-42.1	-42.9592	-0.956818	GTACAGAAGAGAGTGAGCACACATGGTCTTTTTTCTTGCATGGACTGTCCACGCCTGAAGCTCTGCGTGCTTGCTCTCTATCTGTCAC	Contig51	88	17	23	21	27	50	-37.9	-43.0682	-0.861364	GCTCTCTCTCTTCTGTCATAGATTATCTTCATGAGATTTGAAATGGATGAGAGAAGAATCTATGTTGAAGAGGAGGAAGAG	Contig2838
	bpe-miR156a-5p.C20G	20	TGACAGAAGAGAGTGAGCAG	TTCCCTGGGACATAGAAATTGACAGAAGAGAGTGAGCACACAGAGGCCATATGGTATAAAGTCTATACTAATGCTTTTGCGTGCTCACTTCTCTTTCTGTCAGATTCCAGTCCCGGAGGAG	Contig511	121	33	26	29	33	48.7603	-65.4	-54.0496	-1.10847	GAAGCTGACAGAAAGAGAAGTGAGCACGCACTCGCAAAGGTATGCTCTCATACAATTGCCTGCAGCGTGTGCTCACTCTCTTCTGTCAGTCTC	Contig801	93	24	25	22	22	50.5376	-49.3	-53.0108	-1.04894	GGTAAGGGAGGTGACAGAAGAGAGTGAGCACACATGGTATTTCTTGCATGCCGTGTTTCATGCTTGAATCTCTGCGTGCTTACTCTCTATCTGTCGTCCCCACCGCC	Contig237	98	27	25	19	27	44.898	-42.1	-42.9592	-0.956818	GTACAGAAGAGAGTGAGCACACATGGTCTTTTTTCTTGCATGGACTGTCCACGCCTGAAGCTCTGCGTGCTTGCTCTCTATCTGTCAC	Contig51	88	17	23	21	27	50	-37.9	-43.0682	-0.861364	GCTCTCTCTCTTCTGTCATAGATTATCTTCATGAGATTTGAAATGGATGAGAGAAGAATCTATGTTGAAGAGGAGGAAGAG	Contig2838
	bpe-miR156a-5p.G13T	20	TGACAGAAGAGATTGAGCAC	TTCCCTGGGACATAGAAATTGACAGAAGAGAGTGAGCACACAGAGGCCATATGGTATAAAGTCTATACTAATGCTTTTGCGTGCTCACTTCTCTTTCTGTCAGATTCCAGTCCCGGAGGAG	Contig511	121	33	26	29	33	48.7603	-65.4	-54.0496	-1.10847	GAAGCTGACAGAAAGAGAAGTGAGCACGCACTCGCAAAGGTATGCTCTCATACAATTGCCTGCAGCGTGTGCTCACTCTCTTCTGTCAGTCTC	Contig801	93	24	25	22	22	50.5376	-49.3	-53.0108	-1.04894	GGTAAGGGAGGTGACAGAAGAGAGTGAGCACACATGGTATTTCTTGCATGCCGTGTTTCATGCTTGAATCTCTGCGTGCTTACTCTCTATCTGTCGTCCCCACCGCC	Contig237	98	27	25	19	27	44.898	-42.1	-42.9592	-0.956818	GTACAGAAGAGAGTGAGCACACATGGTCTTTTTTCTTGCATGGACTGTCCACGCCTGAAGCTCTGCGTGCTTGCTCTCTATCTGTCAC	Contig51	88	17	23	21	27	50	-37.9	-43.0682	-0.861364	GCTCTCTCTCTTCTGTCATAGATTATCTTCATGAGATTTGAAATGGATGAGAGAAGAATCTATGTTGAAGAGGAGGAAGAG	Contig2838
	bpe-miR156a-5p.ts.G1C.A2G.C3T.A4G.G5C.A6T.A7C.G8A.A9C.G10T.A11C.G12T.T13C.G14T.A15T.G16C.C17T.A18G.C19T.C	20	CGTGCTCACTCTCTTCTGTC	TTCCCTGGGACATAGAAATTGACAGAAGAGAGTGAGCACACAGAGGCCATATGGTATAAAGTCTATACTAATGCTTTTGCGTGCTCACTTCTCTTTCTGTCAGATTCCAGTCCCGGAGGAG	Contig511	121	33	26	29	33	48.7603	-65.4	-54.0496	-1.10847	GAAGCTGACAGAAAGAGAAGTGAGCACGCACTCGCAAAGGTATGCTCTCATACAATTGCCTGCAGCGTGTGCTCACTCTCTTCTGTCAGTCTC	Contig801	93	24	25	22	22	50.5376	-49.3	-53.0108	-1.04894	GGTAAGGGAGGTGACAGAAGAGAGTGAGCACACATGGTATTTCTTGCATGCCGTGTTTCATGCTTGAATCTCTGCGTGCTTACTCTCTATCTGTCGTCCCCACCGCC	Contig237	98	27	25	19	27	44.898	-42.1	-42.9592	-0.956818	GTACAGAAGAGAGTGAGCACACATGGTCTTTTTTCTTGCATGGACTGTCCACGCCTGAAGCTCTGCGTGCTTGCTCTCTATCTGTCAC	Contig51	88	17	23	21	27	50	-37.9	-43.0682	-0.861364	GCTCTCTCTCTTCTGTCATAGATTATCTTCATGAGATTTGAAATGGATGAGAGAAGAATCTATGTTGAAGAGGAGGAAGAG	Contig2838
	bpe-miR156a-5p.ts.A2T.C3G.A4C.G5T.A6C.G8C.A9T.G10C.A11T.G12C.G14T.A15C.G16T.C17G.A18T	19	GTGCTCACTCTCTTCTGTC	TTCCCTGGGACATAGAAATTGACAGAAGAGAGTGAGCACACAGAGGCCATATGGTATAAAGTCTATACTAATGCTTTTGCGTGCTCACTTCTCTTTCTGTCAGATTCCAGTCCCGGAGGAG	Contig511	121	33	26	29	33	48.7603	-65.4	-54.0496	-1.10847	GAAGCTGACAGAAAGAGAAGTGAGCACGCACTCGCAAAGGTATGCTCTCATACAATTGCCTGCAGCGTGTGCTCACTCTCTTCTGTCAGTCTC	Contig801	93	24	25	22	22	50.5376	-49.3	-53.0108	-1.04894	GGTAAGGGAGGTGACAGAAGAGAGTGAGCACACATGGTATTTCTTGCATGCCGTGTTTCATGCTTGAATCTCTGCGTGCTTACTCTCTATCTGTCGTCCCCACCGCC	Contig237	98	27	25	19	27	44.898	-42.1	-42.9592	-0.956818	GTACAGAAGAGAGTGAGCACACATGGTCTTTTTTCTTGCATGGACTGTCCACGCCTGAAGCTCTGCGTGCTTGCTCTCTATCTGTCAC	Contig51	88	17	23	21	27	50	-37.9	-43.0682	-0.861364	GCTCTCTCTCTTCTGTCATAGATTATCTTCATGAGATTTGAAATGGATGAGAGAAGAATCTATGTTGAAGAGGAGGAAGAG	Contig2838
	bpe-miR156a-5p.ts.AG	21	GACAGAAGAGAGTGAGCACAG	TTCCCTGGGACATAGAAATTGACAGAAGAGAGTGAGCACACAGAGGCCATATGGTATAAAGTCTATACTAATGCTTTTGCGTGCTCACTTCTCTTTCTGTCAGATTCCAGTCCCGGAGGAG	Contig511	121	33	26	29	33	48.7603	-65.4	-54.0496	-1.10847	GAAGCTGACAGAAAGAGAAGTGAGCACGCACTCGCAAAGGTATGCTCTCATACAATTGCCTGCAGCGTGTGCTCACTCTCTTCTGTCAGTCTC	Contig801	93	24	25	22	22	50.5376	-49.3	-53.0108	-1.04894	GGTAAGGGAGGTGACAGAAGAGAGTGAGCACACATGGTATTTCTTGCATGCCGTGTTTCATGCTTGAATCTCTGCGTGCTTACTCTCTATCTGTCGTCCCCACCGCC	Contig237	98	27	25	19	27	44.898	-42.1	-42.9592	-0.956818	GTACAGAAGAGAGTGAGCACACATGGTCTTTTTTCTTGCATGGACTGTCCACGCCTGAAGCTCTGCGTGCTTGCTCTCTATCTGTCAC	Contig51	88	17	23	21	27	50	-37.9	-43.0682	-0.861364	GCTCTCTCTCTTCTGTCATAGATTATCTTCATGAGATTTGAAATGGATGAGAGAAGAATCTATGTTGAAGAGGAGGAAGAG	Contig2838
	bpe-miR156a-5p.ts.c	18	GACAGAAGAGAGTGAGCA	TTCCCTGGGACATAGAAATTGACAGAAGAGAGTGAGCACACAGAGGCCATATGGTATAAAGTCTATACTAATGCTTTTGCGTGCTCACTTCTCTTTCTGTCAGATTCCAGTCCCGGAGGAG	Contig511	121	33	26	29	33	48.7603	-65.4	-54.0496	-1.10847	GAAGCTGACAGAAAGAGAAGTGAGCACGCACTCGCAAAGGTATGCTCTCATACAATTGCCTGCAGCGTGTGCTCACTCTCTTCTGTCAGTCTC	Contig801	93	24	25	22	22	50.5376	-49.3	-53.0108	-1.04894	GGTAAGGGAGGTGACAGAAGAGAGTGAGCACACATGGTATTTCTTGCATGCCGTGTTTCATGCTTGAATCTCTGCGTGCTTACTCTCTATCTGTCGTCCCCACCGCC	Contig237	98	27	25	19	27	44.898	-42.1	-42.9592	-0.956818	GTACAGAAGAGAGTGAGCACACATGGTCTTTTTTCTTGCATGGACTGTCCACGCCTGAAGCTCTGCGTGCTTGCTCTCTATCTGTCAC	Contig51	88	17	23	21	27	50	-37.9	-43.0682	-0.861364	GCTCTCTCTCTTCTGTCATAGATTATCTTCATGAGATTTGAAATGGATGAGAGAAGAATCTATGTTGAAGAGGAGGAAGAG	Contig2838
	bpe-miR156a-5p.tgs.A	19	ACAGAAGAGAGTGAGCACA	TTCCCTGGGACATAGAAATTGACAGAAGAGAGTGAGCACACAGAGGCCATATGGTATAAAGTCTATACTAATGCTTTTGCGTGCTCACTTCTCTTTCTGTCAGATTCCAGTCCCGGAGGAG	Contig511	121	33	26	29	33	48.7603	-65.4	-54.0496	-1.10847	GAAGCTGACAGAAAGAGAAGTGAGCACGCACTCGCAAAGGTATGCTCTCATACAATTGCCTGCAGCGTGTGCTCACTCTCTTCTGTCAGTCTC	Contig801	93	24	25	22	22	50.5376	-49.3	-53.0108	-1.04894	GGTAAGGGAGGTGACAGAAGAGAGTGAGCACACATGGTATTTCTTGCATGCCGTGTTTCATGCTTGAATCTCTGCGTGCTTACTCTCTATCTGTCGTCCCCACCGCC	Contig237	98	27	25	19	27	44.898	-42.1	-42.9592	-0.956818	GTACAGAAGAGAGTGAGCACACATGGTCTTTTTTCTTGCATGGACTGTCCACGCCTGAAGCTCTGCGTGCTTGCTCTCTATCTGTCAC	Contig51	88	17	23	21	27	50	-37.9	-43.0682	-0.861364	GCTCTCTCTCTTCTGTCATAGATTATCTTCATGAGATTTGAAATGGATGAGAGAAGAATCTATGTTGAAGAGGAGGAAGAG	Contig2838
bpe-miR156aa	bpe-miR156aa.ts.A2C.C3T.A4C.G5T.G6C.A7T.G8A.A9G.T10C.A11T.G12C.A13C.G14T.A15G.G16T.ac	17	GCTCTCTAGCTCCTGTC	TGACAGAAGATAGAGAGCACAGATGATGAAATGCATGGAACTGCTGCATCTCACTCCTTTGTGCTCTCTAGCTCCTGTCA	Contig789	80	22	19	18	21	50	-38.5	-48.125	-0.9625
	bpe-miR156aa.T1G.G2C.A3T.A5T.G6C.G7T.A10C.A12C.G13C.A14T.A16T.G17C.C18A.ac	18	GCTCTCTAGCTCCTGTCA	TGACAGAAGATAGAGAGCACAGATGATGAAATGCATGGAACTGCTGCATCTCACTCCTTTGTGCTCTCTAGCTCCTGTCA	Contig789	80	22	19	18	21	50	-38.5	-48.125	-0.9625
	bpe-miR156aa.TGs.T1C.G2T.A3C.C4T.A5C.G6T.G7A.A8G.G9C.A10T.T11C.A12C.G13T.A14G.G15T.A16C.G17A.C18T.A19C.c	21	TGCTCTCTAGCTCCTGTCATC	TGACAGAAGATAGAGAGCACAGATGATGAAATGCATGGAACTGCTGCATCTCACTCCTTTGTGCTCTCTAGCTCCTGTCA	Contig789	80	22	19	18	21	50	-38.5	-48.125	-0.9625
	bpe-miR156aa.GCs.G2C.A3T.A5T.G6A.A8C.G9T.A10C.T11C.A12T.A14T.G15C.ac	20	GCTCTCTAGCTCCTGTCAGC	TGACAGAAGATAGAGAGCACAGATGATGAAATGCATGGAACTGCTGCATCTCACTCCTTTGTGCTCTCTAGCTCCTGTCA	Contig789	80	22	19	18	21	50	-38.5	-48.125	-0.9625
	bpe-miR156aa.TGs.G2A.G7A	22	TGTAACAGAAGATAGAGAGCAC	TGACAGAAGATAGAGAGCACAGATGATGAAATGCATGGAACTGCTGCATCTCACTCCTTTGTGCTCTCTAGCTCCTGTCA	Contig789	80	22	19	18	21	50	-38.5	-48.125	-0.9625
	bpe-miR156aa.TGs.G7A.ac	20	TGTGACAGAAGATAGAGAGC	TGACAGAAGATAGAGAGCACAGATGATGAAATGCATGGAACTGCTGCATCTCACTCCTTTGTGCTCTCTAGCTCCTGTCA	Contig789	80	22	19	18	21	50	-38.5	-48.125	-0.9625
	bpe-miR156aa.Gs.T1C.G2T.A3C.C4T.A5C.G6T.G7A.A8G.G9C.A10T.T11C.A12C.G13T.A14G.G15T.A16C.G17A.C18G.ac	19	GCTCTCTAGCTCCTGTCAG	TGACAGAAGATAGAGAGCACAGATGATGAAATGCATGGAACTGCTGCATCTCACTCCTTTGTGCTCTCTAGCTCCTGTCA	Contig789	80	22	19	18	21	50	-38.5	-48.125	-0.9625
	bpe-miR156aa.Gs.T1C.G2T.A3C.C4T.A5C.G6T.G7A.A8G.G9C.A10T.T11C.A12C.G13T.A14G.G15T.A16C.G17A.ac	19	GCTCTCTAGCTCCTGTCAC	TGACAGAAGATAGAGAGCACAGATGATGAAATGCATGGAACTGCTGCATCTCACTCCTTTGTGCTCTCTAGCTCCTGTCA	Contig789	80	22	19	18	21	50	-38.5	-48.125	-0.9625
	bpe-miR156aa.ts.G1T.A2G.C3T.A4G.G5C.G6T.A7C.G8T.A9C.A13C.G14T.A15C.G16C.C17T.A18G.C19T.C	20	TGTGCTCTCTAGCTCCTGTC	TGACAGAAGATAGAGAGCACAGATGATGAAATGCATGGAACTGCTGCATCTCACTCCTTTGTGCTCTCTAGCTCCTGTCA	Contig789	80	22	19	18	21	50	-38.5	-48.125	-0.9625
	bpe-miR156aa.tgs.A1G.A3T.G4C.G5T.A6C.G7T.A10C.G11T.A12C.G13C.A14T.C16T.ac	16	GCTCTCTATCTCCTGT	TGACAGAAGATAGAGAGCACAGATGATGAAATGCATGGAACTGCTGCATCTCACTCCTTTGTGCTCTCTAGCTCCTGTCA	Contig789	80	22	19	18	21	50	-38.5	-48.125	-0.9625
bpe-miR408	bpe-miR408.As.T21C.GT	24	ATGCACTGCCTCTTCCCTGGCCGT	CAGGGAACGGGCAGAGCATGGATGGAGCTATCGACAGTATAGGAACCTGTCGTGGCTCTACTCATGCACTGCCTCTTCCCTG	Contig129	82	18	22	24	18	48.7805	-52.9	-64.5122	-1.3225
	bpe-miR408.C20A	21	TGCACTGCCTCTTCCCTGGAT	CAGGGAACGGGCAGAGCATGGATGGAGCTATCGACAGTATAGGAACCTGTCGTGGCTCTACTCATGCACTGCCTCTTCCCTG	Contig129	82	18	22	24	18	48.7805	-52.9	-64.5122	-1.3225
	bpe-miR408.ts	20	GCACTGCCTCTTCCCTGGCT	CAGGGAACGGGCAGAGCATGGATGGAGCTATCGACAGTATAGGAACCTGTCGTGGCTCTACTCATGCACTGCCTCTTCCCTG	Contig129	82	18	22	24	18	48.7805	-52.9	-64.5122	-1.3225
	bpe-miR408.C16G	21	TGCACTGCCTCTTCCGTGGCT	CAGGGAACGGGCAGAGCATGGATGGAGCTATCGACAGTATAGGAACCTGTCGTGGCTCTACTCATGCACTGCCTCTTCCCTG	Contig129	82	18	22	24	18	48.7805	-52.9	-64.5122	-1.3225
	bpe-miR408.C20T.T21A	21	TGCACTGCCTCTTCCCTGGTA	CAGGGAACGGGCAGAGCATGGATGGAGCTATCGACAGTATAGGAACCTGTCGTGGCTCTACTCATGCACTGCCTCTTCCCTG	Contig129	82	18	22	24	18	48.7805	-52.9	-64.5122	-1.3225
	bpe-miR408.C15A	21	TGCACTGCCTCTTCACTGGCT	CAGGGAACGGGCAGAGCATGGATGGAGCTATCGACAGTATAGGAACCTGTCGTGGCTCTACTCATGCACTGCCTCTTCCCTG	Contig129	82	18	22	24	18	48.7805	-52.9	-64.5122	-1.3225
	bpe-miR408.C20T	21	TGCACTGCCTCTTCCCTGGTT	CAGGGAACGGGCAGAGCATGGATGGAGCTATCGACAGTATAGGAACCTGTCGTGGCTCTACTCATGCACTGCCTCTTCCCTG	Contig129	82	18	22	24	18	48.7805	-52.9	-64.5122	-1.3225
	bpe-miR408.G19T	21	TGCACTGCCTCTTCCCTGTCT	CAGGGAACGGGCAGAGCATGGATGGAGCTATCGACAGTATAGGAACCTGTCGTGGCTCTACTCATGCACTGCCTCTTCCCTG	Contig129	82	18	22	24	18	48.7805	-52.9	-64.5122	-1.3225
	bpe-miR408.T17A	21	TGCACTGCCTCTTCCCAGGCT	CAGGGAACGGGCAGAGCATGGATGGAGCTATCGACAGTATAGGAACCTGTCGTGGCTCTACTCATGCACTGCCTCTTCCCTG	Contig129	82	18	22	24	18	48.7805	-52.9	-64.5122	-1.3225
bpe-miR398a-3p	bpe-miR398a-3p.A15G	21	TGTGTTCTCAGGTCGCCCCTT	GATGGTTTGGTGGAGGAAAGTCCCACAGGGGCGACCTGAGAACACATTTGACGGACATGAGAACGCCCACATGTGATCTCAGGTCGACCCTGTAGGGCTCCTCCGCCTTTAATC	Contig3589	114	27	30	33	24	47.3684	-62.7	-55	-1.16111	CAGGGTCGACCTTAGATCACATGTGGGCGTTCTCATGTCCGTCAAATGTGTTCTCAGGTCGCCCCTG	Contig485	67	11	19	18	19	55.2239	-34	-50.7463	-0.918919	CCCCAGAGGAGTGACAACTGAGAACACAAAGGTTGTTGGTGCTATAAAATAATGGCTAATGCACTTTGTGTTCTCAGGTCACCCCTTTGGGG	Contig357	92	25	19	24	24	46.7391	-52	-56.5217	-1.2093
	bpe-miR398a-3p.A15G.T	22	TGTGTTCTCAGGTCGCCCCTTT	GATGGTTTGGTGGAGGAAAGTCCCACAGGGGCGACCTGAGAACACATTTGACGGACATGAGAACGCCCACATGTGATCTCAGGTCGACCCTGTAGGGCTCCTCCGCCTTTAATC	Contig3589	114	27	30	33	24	47.3684	-62.7	-55	-1.16111	CAGGGTCGACCTTAGATCACATGTGGGCGTTCTCATGTCCGTCAAATGTGTTCTCAGGTCGCCCCTG	Contig485	67	11	19	18	19	55.2239	-34	-50.7463	-0.918919	CCCCAGAGGAGTGACAACTGAGAACACAAAGGTTGTTGGTGCTATAAAATAATGGCTAATGCACTTTGTGTTCTCAGGTCACCCCTTTGGGG	Contig357	92	25	19	24	24	46.7391	-52	-56.5217	-1.2093
	bpe-miR398a-3p.A15G.TT	23	TGTGTTCTCAGGTCGCCCCTTTT	GATGGTTTGGTGGAGGAAAGTCCCACAGGGGCGACCTGAGAACACATTTGACGGACATGAGAACGCCCACATGTGATCTCAGGTCGACCCTGTAGGGCTCCTCCGCCTTTAATC	Contig3589	114	27	30	33	24	47.3684	-62.7	-55	-1.16111	CAGGGTCGACCTTAGATCACATGTGGGCGTTCTCATGTCCGTCAAATGTGTTCTCAGGTCGCCCCTG	Contig485	67	11	19	18	19	55.2239	-34	-50.7463	-0.918919	CCCCAGAGGAGTGACAACTGAGAACACAAAGGTTGTTGGTGCTATAAAATAATGGCTAATGCACTTTGTGTTCTCAGGTCACCCCTTTGGGG	Contig357	92	25	19	24	24	46.7391	-52	-56.5217	-1.2093
	bpe-miR398a-3p.Ts.A15G.tt	20	TTGTGTTCTCAGGTCGCCCC	GATGGTTTGGTGGAGGAAAGTCCCACAGGGGCGACCTGAGAACACATTTGACGGACATGAGAACGCCCACATGTGATCTCAGGTCGACCCTGTAGGGCTCCTCCGCCTTTAATC	Contig3589	114	27	30	33	24	47.3684	-62.7	-55	-1.16111	CAGGGTCGACCTTAGATCACATGTGGGCGTTCTCATGTCCGTCAAATGTGTTCTCAGGTCGCCCCTG	Contig485	67	11	19	18	19	55.2239	-34	-50.7463	-0.918919	CCCCAGAGGAGTGACAACTGAGAACACAAAGGTTGTTGGTGCTATAAAATAATGGCTAATGCACTTTGTGTTCTCAGGTCACCCCTTTGGGG	Contig357	92	25	19	24	24	46.7391	-52	-56.5217	-1.2093
	bpe-miR398a-3p.A15G.C19T	21	TGTGTTCTCAGGTCGCCCTTT	GATGGTTTGGTGGAGGAAAGTCCCACAGGGGCGACCTGAGAACACATTTGACGGACATGAGAACGCCCACATGTGATCTCAGGTCGACCCTGTAGGGCTCCTCCGCCTTTAATC	Contig3589	114	27	30	33	24	47.3684	-62.7	-55	-1.16111	CAGGGTCGACCTTAGATCACATGTGGGCGTTCTCATGTCCGTCAAATGTGTTCTCAGGTCGCCCCTG	Contig485	67	11	19	18	19	55.2239	-34	-50.7463	-0.918919	CCCCAGAGGAGTGACAACTGAGAACACAAAGGTTGTTGGTGCTATAAAATAATGGCTAATGCACTTTGTGTTCTCAGGTCACCCCTTTGGGG	Contig357	92	25	19	24	24	46.7391	-52	-56.5217	-1.2093
	bpe-miR398a-3p.A15G.C19T.T	22	TGTGTTCTCAGGTCGCCCTTTT	GATGGTTTGGTGGAGGAAAGTCCCACAGGGGCGACCTGAGAACACATTTGACGGACATGAGAACGCCCACATGTGATCTCAGGTCGACCCTGTAGGGCTCCTCCGCCTTTAATC	Contig3589	114	27	30	33	24	47.3684	-62.7	-55	-1.16111	CAGGGTCGACCTTAGATCACATGTGGGCGTTCTCATGTCCGTCAAATGTGTTCTCAGGTCGCCCCTG	Contig485	67	11	19	18	19	55.2239	-34	-50.7463	-0.918919	CCCCAGAGGAGTGACAACTGAGAACACAAAGGTTGTTGGTGCTATAAAATAATGGCTAATGCACTTTGTGTTCTCAGGTCACCCCTTTGGGG	Contig357	92	25	19	24	24	46.7391	-52	-56.5217	-1.2093
	bpe-miR398a-3p.Ts.T1G.A15G.T	23	TGGTGTTCTCAGGTCGCCCCTTT	GATGGTTTGGTGGAGGAAAGTCCCACAGGGGCGACCTGAGAACACATTTGACGGACATGAGAACGCCCACATGTGATCTCAGGTCGACCCTGTAGGGCTCCTCCGCCTTTAATC	Contig3589	114	27	30	33	24	47.3684	-62.7	-55	-1.16111	CAGGGTCGACCTTAGATCACATGTGGGCGTTCTCATGTCCGTCAAATGTGTTCTCAGGTCGCCCCTG	Contig485	67	11	19	18	19	55.2239	-34	-50.7463	-0.918919	CCCCAGAGGAGTGACAACTGAGAACACAAAGGTTGTTGGTGCTATAAAATAATGGCTAATGCACTTTGTGTTCTCAGGTCACCCCTTTGGGG	Contig357	92	25	19	24	24	46.7391	-52	-56.5217	-1.2093
	bpe-miR398a-3p.C16G.t	20	TGTGTTCTCAGGTCAGCCCT	GATGGTTTGGTGGAGGAAAGTCCCACAGGGGCGACCTGAGAACACATTTGACGGACATGAGAACGCCCACATGTGATCTCAGGTCGACCCTGTAGGGCTCCTCCGCCTTTAATC	Contig3589	114	27	30	33	24	47.3684	-62.7	-55	-1.16111	CAGGGTCGACCTTAGATCACATGTGGGCGTTCTCATGTCCGTCAAATGTGTTCTCAGGTCGCCCCTG	Contig485	67	11	19	18	19	55.2239	-34	-50.7463	-0.918919	CCCCAGAGGAGTGACAACTGAGAACACAAAGGTTGTTGGTGCTATAAAATAATGGCTAATGCACTTTGTGTTCTCAGGTCACCCCTTTGGGG	Contig357	92	25	19	24	24	46.7391	-52	-56.5217	-1.2093
	bpe-miR398a-3p.A15G.T20C.T	22	TGTGTTCTCAGGTCGCCCCCTT	GATGGTTTGGTGGAGGAAAGTCCCACAGGGGCGACCTGAGAACACATTTGACGGACATGAGAACGCCCACATGTGATCTCAGGTCGACCCTGTAGGGCTCCTCCGCCTTTAATC	Contig3589	114	27	30	33	24	47.3684	-62.7	-55	-1.16111	CAGGGTCGACCTTAGATCACATGTGGGCGTTCTCATGTCCGTCAAATGTGTTCTCAGGTCGCCCCTG	Contig485	67	11	19	18	19	55.2239	-34	-50.7463	-0.918919	CCCCAGAGGAGTGACAACTGAGAACACAAAGGTTGTTGGTGCTATAAAATAATGGCTAATGCACTTTGTGTTCTCAGGTCACCCCTTTGGGG	Contig357	92	25	19	24	24	46.7391	-52	-56.5217	-1.2093
	bpe-miR398a-3p.C7T.A15G.T	22	TGTGTTTTCAGGTCGCCCCTTT	GATGGTTTGGTGGAGGAAAGTCCCACAGGGGCGACCTGAGAACACATTTGACGGACATGAGAACGCCCACATGTGATCTCAGGTCGACCCTGTAGGGCTCCTCCGCCTTTAATC	Contig3589	114	27	30	33	24	47.3684	-62.7	-55	-1.16111	CAGGGTCGACCTTAGATCACATGTGGGCGTTCTCATGTCCGTCAAATGTGTTCTCAGGTCGCCCCTG	Contig485	67	11	19	18	19	55.2239	-34	-50.7463	-0.918919	CCCCAGAGGAGTGACAACTGAGAACACAAAGGTTGTTGGTGCTATAAAATAATGGCTAATGCACTTTGTGTTCTCAGGTCACCCCTTTGGGG	Contig357	92	25	19	24	24	46.7391	-52	-56.5217	-1.2093
bpe-miR858b	bpe-miR858b	21	TTCGTTGTCTGTTCGACCTTG	-
	bpe-miR858b.G21T	21	TTCGTTGTCTGTTCGACCTTT	-
	bpe-miR858b.T	22	TTCGTTGTCTGTTCGACCTTGT	-
	bpe-miR858b.ts	20	TCGTTGTCTGTTCGACCTTG	-
	bpe-miR858b.As	22	ATTCGTTGTCTGTTCGACCTTG	-
	bpe-miR858b.T1A	21	ATCGTTGTCTGTTCGACCTTG	-
	bpe-miR858b.T1C.G.C	23	CTCGTTGTCTGTTCGACCTTGGC	-
	bpe-miR858b.Cs.T2C.C3T	22	CTCTGTTGTCTGTTCGACCTTG	-
	bpe-miR858b.Cs.T2G.G21T.G	23	CTGCGTTGTCTGTTCGACCTTTG	-
	bpe-miR858b.Cs	22	CTTCGTTGTCTGTTCGACCTTG	-
	bpe-miR858b.Cs.T2G	22	CTGCGTTGTCTGTTCGACCTTG	-
	bpe-miR858b.Cs.G21T	22	CTTCGTTGTCTGTTCGACCTTT	-
	bpe-miR858b.Cs.T1G.G21T	22	CGTCGTTGTCTGTTCGACCTTT	-
	bpe-miR858b.Cs.T1G	22	CGTCGTTGTCTGTTCGACCTTG	-
	bpe-miR858b.Cs.tg	20	CTTCGTTGTCTGTTCGACCT	-
	bpe-miR858b.A	22	TTCGTTGTCTGTTCGACCTTGA	-
	bpe-miR858b.G21C	21	TTCGTTGTCTGTTCGACCTTC	-
	bpe-miR858b.TC	23	TTCGTTGTCTGTTCGACCTTGTC	-
	bpe-miR858b.T19A	21	TTCGTTGTCTGTTCGACCATG	-
	bpe-miR858b.G.C	23	TTCGTTGTCTGTTCGACCTTGGC	-
	bpe-miR858b.G21T.T	22	TTCGTTGTCTGTTCGACCTTTT	-
bpe-miR156ab	bpe-miR156ab.GCs.T2C.G3T.A4C.C5T.G8C.A9T.G10C.A11C.A13G.G14T.A15C.G16A.A17T.G18C.C19A.ac	21	GCTCTCTAGCTCCTGTCATCA	AGTTTTAAAGTAGAGGAGGCACTGGTGATGTTGTTGACAGAAGATAGAGAGCACAGATGATGAAATGCATGGAACTGCTGCATCTCACTCCTTTGTGCTCTCTAGCTCCTGTCATCACCCTCAGCCCCTCACTTCAACT	Contig789	80	22	19	18	21	50	-38.5	-48.125	-0.9625
	bpe-miR156ab.tts.A2C.C3T.A4C.G5T.G6C.A7T.G8A.A9G.T10C.A11T.G12C.A13C.G14T.A15G.G16T.ac	17	GCTCTCTAGCTCCTGTC	AGTTTTAAAGTAGAGGAGGCACTGGTGATGTTGTTGACAGAAGATAGAGAGCACAGATGATGAAATGCATGGAACTGCTGCATCTCACTCCTTTGTGCTCTCTAGCTCCTGTCATCACCCTCAGCCCCTCACTTCAACT	Contig789	80	22	19	18	21	50	-38.5	-48.125	-0.9625
	bpe-miR156ab.ts.T1G.G2C.A3T.A5T.G6C.G7T.A10C.A12C.G13C.A14T.A16T.G17C.C18A.ac	18	GCTCTCTAGCTCCTGTCA	AGTTTTAAAGTAGAGGAGGCACTGGTGATGTTGTTGACAGAAGATAGAGAGCACAGATGATGAAATGCATGGAACTGCTGCATCTCACTCCTTTGTGCTCTCTAGCTCCTGTCATCACCCTCAGCCCCTCACTTCAACT	Contig789	80	22	19	18	21	50	-38.5	-48.125	-0.9625
	bpe-miR156ab.Ts.T1G.T2C.G3T.A4C.C5T.A6C.G7T.G8A.A9G.G10C.A11T.T12C.A13C.G14T.A15G.G16T.A17C.G18A.C19T.A20C.c	21	TGCTCTCTAGCTCCTGTCATC	AGTTTTAAAGTAGAGGAGGCACTGGTGATGTTGTTGACAGAAGATAGAGAGCACAGATGATGAAATGCATGGAACTGCTGCATCTCACTCCTTTGTGCTCTCTAGCTCCTGTCATCACCCTCAGCCCCTCACTTCAACT	Contig789	80	22	19	18	21	50	-38.5	-48.125	-0.9625
	bpe-miR156ab.A6G.G7A	21	TTGACGAGAGATAGAGAGCAC	AGTTTTAAAGTAGAGGAGGCACTGGTGATGTTGTTGACAGAAGATAGAGAGCACAGATGATGAAATGCATGGAACTGCTGCATCTCACTCCTTTGTGCTCTCTAGCTCCTGTCATCACCCTCAGCCCCTCACTTCAACT	Contig789	80	22	19	18	21	50	-38.5	-48.125	-0.9625
	bpe-miR156ab	21	TTGACAGGAGATAGAGAGCAC	AGTTTTAAAGTAGAGGAGGCACTGGTGATGTTGTTGACAGAAGATAGAGAGCACAGATGATGAAATGCATGGAACTGCTGCATCTCACTCCTTTGTGCTCTCTAGCTCCTGTCATCACCCTCAGCCCCTCACTTCAACT	Contig789	80	22	19	18	21	50	-38.5	-48.125	-0.9625
	bpe-miR156ab.tts.G1T.A2G.C3T.A4G.G5C.G6T.A7C.G8T.A9C.A13C.G14T.A15C.G16C.C17T.A18G.C19T.C	20	TGTGCTCTCTAGCTCCTGTC	AGTTTTAAAGTAGAGGAGGCACTGGTGATGTTGTTGACAGAAGATAGAGAGCACAGATGATGAAATGCATGGAACTGCTGCATCTCACTCCTTTGTGCTCTCTAGCTCCTGTCATCACCCTCAGCCCCTCACTTCAACT	Contig789	80	22	19	18	21	50	-38.5	-48.125	-0.9625
bpe-miR171h	bpe-miR171h	21	TTGAGCCGCGTCAATATCTCC	AGGGATGGAGAAGGGTGTAAAAGGAGATATTGACGCGGCTCAATCAAAATCAAATGGCTAATTTCTCTTTTAACCATGTCTTCAAATTGAGCCACGTTAATACCTTCGTTTACAAAATATTTTAACACCCCTCCATCTCT	Contig386	140	45	29	24	42	50.7143	-52.4	-37.4286	-0.738028
	bpe-miR171h.T	22	TTGAGCCGCGTCAATATCTCCT	AGGGATGGAGAAGGGTGTAAAAGGAGATATTGACGCGGCTCAATCAAAATCAAATGGCTAATTTCTCTTTTAACCATGTCTTCAAATTGAGCCACGTTAATACCTTCGTTTACAAAATATTTTAACACCCCTCCATCTCT	Contig386	140	45	29	24	42	50.7143	-52.4	-37.4286	-0.738028
	bpe-miR171h.TT	23	TTGAGCCGCGTCAATATCTCCTT	AGGGATGGAGAAGGGTGTAAAAGGAGATATTGACGCGGCTCAATCAAAATCAAATGGCTAATTTCTCTTTTAACCATGTCTTCAAATTGAGCCACGTTAATACCTTCGTTTACAAAATATTTTAACACCCCTCCATCTCT	Contig386	140	45	29	24	42	50.7143	-52.4	-37.4286	-0.738028
	bpe-miR171h.G	22	TTGAGCCGCGTCAATATCTCCG	AGGGATGGAGAAGGGTGTAAAAGGAGATATTGACGCGGCTCAATCAAAATCAAATGGCTAATTTCTCTTTTAACCATGTCTTCAAATTGAGCCACGTTAATACCTTCGTTTACAAAATATTTTAACACCCCTCCATCTCT	Contig386	140	45	29	24	42	50.7143	-52.4	-37.4286	-0.738028
	bpe-miR171h.C	22	TTGAGCCGCGTCAATATCTCCC	AGGGATGGAGAAGGGTGTAAAAGGAGATATTGACGCGGCTCAATCAAAATCAAATGGCTAATTTCTCTTTTAACCATGTCTTCAAATTGAGCCACGTTAATACCTTCGTTTACAAAATATTTTAACACCCCTCCATCTCT	Contig386	140	45	29	24	42	50.7143	-52.4	-37.4286	-0.738028
	bpe-miR171h.C21T.TT	23	TTGAGCCGCGTCAATATCTCTTT	AGGGATGGAGAAGGGTGTAAAAGGAGATATTGACGCGGCTCAATCAAAATCAAATGGCTAATTTCTCTTTTAACCATGTCTTCAAATTGAGCCACGTTAATACCTTCGTTTACAAAATATTTTAACACCCCTCCATCTCT	Contig386	140	45	29	24	42	50.7143	-52.4	-37.4286	-0.738028
	bpe-miR171h.tts	19	GAGCCGCGTCAATATCTCC	AGGGATGGAGAAGGGTGTAAAAGGAGATATTGACGCGGCTCAATCAAAATCAAATGGCTAATTTCTCTTTTAACCATGTCTTCAAATTGAGCCACGTTAATACCTTCGTTTACAAAATATTTTAACACCCCTCCATCTCT	Contig386	140	45	29	24	42	50.7143	-52.4	-37.4286	-0.738028
	bpe-miR171h.Gs	22	GTTGAGCCGCGTCAATATCTCC	AGGGATGGAGAAGGGTGTAAAAGGAGATATTGACGCGGCTCAATCAAAATCAAATGGCTAATTTCTCTTTTAACCATGTCTTCAAATTGAGCCACGTTAATACCTTCGTTTACAAAATATTTTAACACCCCTCCATCTCT	Contig386	140	45	29	24	42	50.7143	-52.4	-37.4286	-0.738028
	bpe-miR171h.Gs.T	23	GTTGAGCCGCGTCAATATCTCCT	AGGGATGGAGAAGGGTGTAAAAGGAGATATTGACGCGGCTCAATCAAAATCAAATGGCTAATTTCTCTTTTAACCATGTCTTCAAATTGAGCCACGTTAATACCTTCGTTTACAAAATATTTTAACACCCCTCCATCTCT	Contig386	140	45	29	24	42	50.7143	-52.4	-37.4286	-0.738028
	bpe-miR171h.C20A	21	TTGAGCCGCGTCAATATCTAC	AGGGATGGAGAAGGGTGTAAAAGGAGATATTGACGCGGCTCAATCAAAATCAAATGGCTAATTTCTCTTTTAACCATGTCTTCAAATTGAGCCACGTTAATACCTTCGTTTACAAAATATTTTAACACCCCTCCATCTCT	Contig386	140	45	29	24	42	50.7143	-52.4	-37.4286	-0.738028
	bpe-miR171h.GT	23	TTGAGCCGCGTCAATATCTCCGT	AGGGATGGAGAAGGGTGTAAAAGGAGATATTGACGCGGCTCAATCAAAATCAAATGGCTAATTTCTCTTTTAACCATGTCTTCAAATTGAGCCACGTTAATACCTTCGTTTACAAAATATTTTAACACCCCTCCATCTCT	Contig386	140	45	29	24	42	50.7143	-52.4	-37.4286	-0.738028
	bpe-miR171h.C12T	21	TTGAGCCGCGTTAATATCTCC	AGGGATGGAGAAGGGTGTAAAAGGAGATATTGACGCGGCTCAATCAAAATCAAATGGCTAATTTCTCTTTTAACCATGTCTTCAAATTGAGCCACGTTAATACCTTCGTTTACAAAATATTTTAACACCCCTCCATCTCT	Contig386	140	45	29	24	42	50.7143	-52.4	-37.4286	-0.738028
bpe-miR394-5p	bpe-miR394a-5p	20	TTGGCATTCTGTCCACCTCC	TTGCAGAGCCAATTTGGCATTCTGTCCACCTCCATCAAATGGGCTCTGTAAAAGCTTTTGGAGGCGGCCAGCATGTCAAATGGGCTCTGTAA	Contig1109	92	22	22	23	25	51.087	-46.4	-50.4348	-0.987234	AGAACCCATTTGACATGCTGGCCGCCTCCAAAAAGCTTATACTCACACTTGATGGAGGTGGACAGAATGCCAAATTGGTTCT	Contig1643	82	24	20	18	20	46.3415	-35.9	-43.7805	-0.944737	TCATGTGGGTTTAGCAAAGGGTTTCTAACAGAGTTTATTGGCATTCTGTCCACCTCCCTTCTATAGAAAAACCTGCTCTCTCTCTCTCTTTCATGGAGGTGGGCATACTGCCAACTGAGCTCTGTTGGCTTCTCTTTGTAAGACCCTCGTGA	Contig134	152	30	38	32	52	46.0526	-72	-47.3684	-1.02857
	bpe-miR394a-5p.T	21	TTGGCATTCTGTCCACCTCCT	TTGCAGAGCCAATTTGGCATTCTGTCCACCTCCATCAAATGGGCTCTGTAAAAGCTTTTGGAGGCGGCCAGCATGTCAAATGGGCTCTGTAA	Contig1109	92	22	22	23	25	51.087	-46.4	-50.4348	-0.987234	AGAACCCATTTGACATGCTGGCCGCCTCCAAAAAGCTTATACTCACACTTGATGGAGGTGGACAGAATGCCAAATTGGTTCT	Contig1643	82	24	20	18	20	46.3415	-35.9	-43.7805	-0.944737	TCATGTGGGTTTAGCAAAGGGTTTCTAACAGAGTTTATTGGCATTCTGTCCACCTCCCTTCTATAGAAAAACCTGCTCTCTCTCTCTCTTTCATGGAGGTGGGCATACTGCCAACTGAGCTCTGTTGGCTTCTCTTTGTAAGACCCTCGTGA	Contig134	152	30	38	32	52	46.0526	-72	-47.3684	-1.02857
	bpe-miR394a-5p.c	19	TTGGCATTCTGTCCACCTC	TTGCAGAGCCAATTTGGCATTCTGTCCACCTCCATCAAATGGGCTCTGTAAAAGCTTTTGGAGGCGGCCAGCATGTCAAATGGGCTCTGTAA	Contig1109	92	22	22	23	25	51.087	-46.4	-50.4348	-0.987234	AGAACCCATTTGACATGCTGGCCGCCTCCAAAAAGCTTATACTCACACTTGATGGAGGTGGACAGAATGCCAAATTGGTTCT	Contig1643	82	24	20	18	20	46.3415	-35.9	-43.7805	-0.944737	TCATGTGGGTTTAGCAAAGGGTTTCTAACAGAGTTTATTGGCATTCTGTCCACCTCCCTTCTATAGAAAAACCTGCTCTCTCTCTCTCTTTCATGGAGGTGGGCATACTGCCAACTGAGCTCTGTTGGCTTCTCTTTGTAAGACCCTCGTGA	Contig134	152	30	38	32	52	46.0526	-72	-47.3684	-1.02857
	bpe-miR394a-5p.TT	22	TTGGCATTCTGTCCACCTCCTT	TTGCAGAGCCAATTTGGCATTCTGTCCACCTCCATCAAATGGGCTCTGTAAAAGCTTTTGGAGGCGGCCAGCATGTCAAATGGGCTCTGTAA	Contig1109	92	22	22	23	25	51.087	-46.4	-50.4348	-0.987234	AGAACCCATTTGACATGCTGGCCGCCTCCAAAAAGCTTATACTCACACTTGATGGAGGTGGACAGAATGCCAAATTGGTTCT	Contig1643	82	24	20	18	20	46.3415	-35.9	-43.7805	-0.944737	TCATGTGGGTTTAGCAAAGGGTTTCTAACAGAGTTTATTGGCATTCTGTCCACCTCCCTTCTATAGAAAAACCTGCTCTCTCTCTCTCTTTCATGGAGGTGGGCATACTGCCAACTGAGCTCTGTTGGCTTCTCTTTGTAAGACCCTCGTGA	Contig134	152	30	38	32	52	46.0526	-72	-47.3684	-1.02857
	bpe-miR394a-5p.C20T.T	21	TTGGCATTCTGTCCACCTCTT	TTGCAGAGCCAATTTGGCATTCTGTCCACCTCCATCAAATGGGCTCTGTAAAAGCTTTTGGAGGCGGCCAGCATGTCAAATGGGCTCTGTAA	Contig1109	92	22	22	23	25	51.087	-46.4	-50.4348	-0.987234	AGAACCCATTTGACATGCTGGCCGCCTCCAAAAAGCTTATACTCACACTTGATGGAGGTGGACAGAATGCCAAATTGGTTCT	Contig1643	82	24	20	18	20	46.3415	-35.9	-43.7805	-0.944737	TCATGTGGGTTTAGCAAAGGGTTTCTAACAGAGTTTATTGGCATTCTGTCCACCTCCCTTCTATAGAAAAACCTGCTCTCTCTCTCTCTTTCATGGAGGTGGGCATACTGCCAACTGAGCTCTGTTGGCTTCTCTTTGTAAGACCCTCGTGA	Contig134	152	30	38	32	52	46.0526	-72	-47.3684	-1.02857
	bpe-miR394a-5p.Ts	21	TTTGGCATTCTGTCCACCTCC	TTGCAGAGCCAATTTGGCATTCTGTCCACCTCCATCAAATGGGCTCTGTAAAAGCTTTTGGAGGCGGCCAGCATGTCAAATGGGCTCTGTAA	Contig1109	92	22	22	23	25	51.087	-46.4	-50.4348	-0.987234	AGAACCCATTTGACATGCTGGCCGCCTCCAAAAAGCTTATACTCACACTTGATGGAGGTGGACAGAATGCCAAATTGGTTCT	Contig1643	82	24	20	18	20	46.3415	-35.9	-43.7805	-0.944737	TCATGTGGGTTTAGCAAAGGGTTTCTAACAGAGTTTATTGGCATTCTGTCCACCTCCCTTCTATAGAAAAACCTGCTCTCTCTCTCTCTTTCATGGAGGTGGGCATACTGCCAACTGAGCTCTGTTGGCTTCTCTTTGTAAGACCCTCGTGA	Contig134	152	30	38	32	52	46.0526	-72	-47.3684	-1.02857
	bpe-miR394a-5p.TG	22	TTGGCATTCTGTCCACCTCCTG	TTGCAGAGCCAATTTGGCATTCTGTCCACCTCCATCAAATGGGCTCTGTAAAAGCTTTTGGAGGCGGCCAGCATGTCAAATGGGCTCTGTAA	Contig1109	92	22	22	23	25	51.087	-46.4	-50.4348	-0.987234	AGAACCCATTTGACATGCTGGCCGCCTCCAAAAAGCTTATACTCACACTTGATGGAGGTGGACAGAATGCCAAATTGGTTCT	Contig1643	82	24	20	18	20	46.3415	-35.9	-43.7805	-0.944737	TCATGTGGGTTTAGCAAAGGGTTTCTAACAGAGTTTATTGGCATTCTGTCCACCTCCCTTCTATAGAAAAACCTGCTCTCTCTCTCTCTTTCATGGAGGTGGGCATACTGCCAACTGAGCTCTGTTGGCTTCTCTTTGTAAGACCCTCGTGA	Contig134	152	30	38	32	52	46.0526	-72	-47.3684	-1.02857
	bpe-miR394a-5p.Ts.T2G	21	TTGGGCATTCTGTCCACCTCC	TTGCAGAGCCAATTTGGCATTCTGTCCACCTCCATCAAATGGGCTCTGTAAAAGCTTTTGGAGGCGGCCAGCATGTCAAATGGGCTCTGTAA	Contig1109	92	22	22	23	25	51.087	-46.4	-50.4348	-0.987234	AGAACCCATTTGACATGCTGGCCGCCTCCAAAAAGCTTATACTCACACTTGATGGAGGTGGACAGAATGCCAAATTGGTTCT	Contig1643	82	24	20	18	20	46.3415	-35.9	-43.7805	-0.944737	TCATGTGGGTTTAGCAAAGGGTTTCTAACAGAGTTTATTGGCATTCTGTCCACCTCCCTTCTATAGAAAAACCTGCTCTCTCTCTCTCTTTCATGGAGGTGGGCATACTGCCAACTGAGCTCTGTTGGCTTCTCTTTGTAAGACCCTCGTGA	Contig134	152	30	38	32	52	46.0526	-72	-47.3684	-1.02857
	bpe-miR394a-5p.Gs	21	GTTGGCATTCTGTCCACCTCC	TTGCAGAGCCAATTTGGCATTCTGTCCACCTCCATCAAATGGGCTCTGTAAAAGCTTTTGGAGGCGGCCAGCATGTCAAATGGGCTCTGTAA	Contig1109	92	22	22	23	25	51.087	-46.4	-50.4348	-0.987234	AGAACCCATTTGACATGCTGGCCGCCTCCAAAAAGCTTATACTCACACTTGATGGAGGTGGACAGAATGCCAAATTGGTTCT	Contig1643	82	24	20	18	20	46.3415	-35.9	-43.7805	-0.944737	TCATGTGGGTTTAGCAAAGGGTTTCTAACAGAGTTTATTGGCATTCTGTCCACCTCCCTTCTATAGAAAAACCTGCTCTCTCTCTCTCTTTCATGGAGGTGGGCATACTGCCAACTGAGCTCTGTTGGCTTCTCTTTGTAAGACCCTCGTGA	Contig134	152	30	38	32	52	46.0526	-72	-47.3684	-1.02857
	bpe-miR394a-5p.Gs.A	22	GTTGGCATTCTGTCCACCTCCA	TTGCAGAGCCAATTTGGCATTCTGTCCACCTCCATCAAATGGGCTCTGTAAAAGCTTTTGGAGGCGGCCAGCATGTCAAATGGGCTCTGTAA	Contig1109	92	22	22	23	25	51.087	-46.4	-50.4348	-0.987234	AGAACCCATTTGACATGCTGGCCGCCTCCAAAAAGCTTATACTCACACTTGATGGAGGTGGACAGAATGCCAAATTGGTTCT	Contig1643	82	24	20	18	20	46.3415	-35.9	-43.7805	-0.944737	TCATGTGGGTTTAGCAAAGGGTTTCTAACAGAGTTTATTGGCATTCTGTCCACCTCCCTTCTATAGAAAAACCTGCTCTCTCTCTCTCTTTCATGGAGGTGGGCATACTGCCAACTGAGCTCTGTTGGCTTCTCTTTGTAAGACCCTCGTGA	Contig134	152	30	38	32	52	46.0526	-72	-47.3684	-1.02857
	bpe-miR394a-5p.T18G.C19T.C	21	TTGGCATTCTGTCCACCGTCC	TTGCAGAGCCAATTTGGCATTCTGTCCACCTCCATCAAATGGGCTCTGTAAAAGCTTTTGGAGGCGGCCAGCATGTCAAATGGGCTCTGTAA	Contig1109	92	22	22	23	25	51.087	-46.4	-50.4348	-0.987234	AGAACCCATTTGACATGCTGGCCGCCTCCAAAAAGCTTATACTCACACTTGATGGAGGTGGACAGAATGCCAAATTGGTTCT	Contig1643	82	24	20	18	20	46.3415	-35.9	-43.7805	-0.944737	TCATGTGGGTTTAGCAAAGGGTTTCTAACAGAGTTTATTGGCATTCTGTCCACCTCCCTTCTATAGAAAAACCTGCTCTCTCTCTCTCTTTCATGGAGGTGGGCATACTGCCAACTGAGCTCTGTTGGCTTCTCTTTGTAAGACCCTCGTGA	Contig134	152	30	38	32	52	46.0526	-72	-47.3684	-1.02857
	bpe-miR394a-5p.cc	18	TTGGCATTCTGTCCACCT	TTGCAGAGCCAATTTGGCATTCTGTCCACCTCCATCAAATGGGCTCTGTAAAAGCTTTTGGAGGCGGCCAGCATGTCAAATGGGCTCTGTAA	Contig1109	92	22	22	23	25	51.087	-46.4	-50.4348	-0.987234	AGAACCCATTTGACATGCTGGCCGCCTCCAAAAAGCTTATACTCACACTTGATGGAGGTGGACAGAATGCCAAATTGGTTCT	Contig1643	82	24	20	18	20	46.3415	-35.9	-43.7805	-0.944737	TCATGTGGGTTTAGCAAAGGGTTTCTAACAGAGTTTATTGGCATTCTGTCCACCTCCCTTCTATAGAAAAACCTGCTCTCTCTCTCTCTTTCATGGAGGTGGGCATACTGCCAACTGAGCTCTGTTGGCTTCTCTTTGTAAGACCCTCGTGA	Contig134	152	30	38	32	52	46.0526	-72	-47.3684	-1.02857
	bpe-miR394a-5p.C19A.c	19	TTGGCATTCTGTCCACCTA	TTGCAGAGCCAATTTGGCATTCTGTCCACCTCCATCAAATGGGCTCTGTAAAAGCTTTTGGAGGCGGCCAGCATGTCAAATGGGCTCTGTAA	Contig1109	92	22	22	23	25	51.087	-46.4	-50.4348	-0.987234	AGAACCCATTTGACATGCTGGCCGCCTCCAAAAAGCTTATACTCACACTTGATGGAGGTGGACAGAATGCCAAATTGGTTCT	Contig1643	82	24	20	18	20	46.3415	-35.9	-43.7805	-0.944737	TCATGTGGGTTTAGCAAAGGGTTTCTAACAGAGTTTATTGGCATTCTGTCCACCTCCCTTCTATAGAAAAACCTGCTCTCTCTCTCTCTTTCATGGAGGTGGGCATACTGCCAACTGAGCTCTGTTGGCTTCTCTTTGTAAGACCCTCGTGA	Contig134	152	30	38	32	52	46.0526	-72	-47.3684	-1.02857
	bpe-miR394a-5p.C	21	TTGGCATTCTGTCCACCTCCC	TTGCAGAGCCAATTTGGCATTCTGTCCACCTCCATCAAATGGGCTCTGTAAAAGCTTTTGGAGGCGGCCAGCATGTCAAATGGGCTCTGTAA	Contig1109	92	22	22	23	25	51.087	-46.4	-50.4348	-0.987234	AGAACCCATTTGACATGCTGGCCGCCTCCAAAAAGCTTATACTCACACTTGATGGAGGTGGACAGAATGCCAAATTGGTTCT	Contig1643	82	24	20	18	20	46.3415	-35.9	-43.7805	-0.944737	TCATGTGGGTTTAGCAAAGGGTTTCTAACAGAGTTTATTGGCATTCTGTCCACCTCCCTTCTATAGAAAAACCTGCTCTCTCTCTCTCTTTCATGGAGGTGGGCATACTGCCAACTGAGCTCTGTTGGCTTCTCTTTGTAAGACCCTCGTGA	Contig134	152	30	38	32	52	46.0526	-72	-47.3684	-1.02857
	bpe-miR394a-5p.C19A.C20T.TT	22	TTGGCATTCTGTCCACCTATTT	TTGCAGAGCCAATTTGGCATTCTGTCCACCTCCATCAAATGGGCTCTGTAAAAGCTTTTGGAGGCGGCCAGCATGTCAAATGGGCTCTGTAA	Contig1109	92	22	22	23	25	51.087	-46.4	-50.4348	-0.987234	AGAACCCATTTGACATGCTGGCCGCCTCCAAAAAGCTTATACTCACACTTGATGGAGGTGGACAGAATGCCAAATTGGTTCT	Contig1643	82	24	20	18	20	46.3415	-35.9	-43.7805	-0.944737	TCATGTGGGTTTAGCAAAGGGTTTCTAACAGAGTTTATTGGCATTCTGTCCACCTCCCTTCTATAGAAAAACCTGCTCTCTCTCTCTCTTTCATGGAGGTGGGCATACTGCCAACTGAGCTCTGTTGGCTTCTCTTTGTAAGACCCTCGTGA	Contig134	152	30	38	32	52	46.0526	-72	-47.3684	-1.02857
	bpe-miR394a-5p.C17T	20	TTGGCATTCTGTCCACTTCC	TTGCAGAGCCAATTTGGCATTCTGTCCACCTCCATCAAATGGGCTCTGTAAAAGCTTTTGGAGGCGGCCAGCATGTCAAATGGGCTCTGTAA	Contig1109	92	22	22	23	25	51.087	-46.4	-50.4348	-0.987234	AGAACCCATTTGACATGCTGGCCGCCTCCAAAAAGCTTATACTCACACTTGATGGAGGTGGACAGAATGCCAAATTGGTTCT	Contig1643	82	24	20	18	20	46.3415	-35.9	-43.7805	-0.944737	TCATGTGGGTTTAGCAAAGGGTTTCTAACAGAGTTTATTGGCATTCTGTCCACCTCCCTTCTATAGAAAAACCTGCTCTCTCTCTCTCTTTCATGGAGGTGGGCATACTGCCAACTGAGCTCTGTTGGCTTCTCTTTGTAAGACCCTCGTGA	Contig134	152	30	38	32	52	46.0526	-72	-47.3684	-1.02857
bpe-miR472-3p	bpe-miR472-3p.ts.T2C.A19G	21	TCTTCCTACTCCGCCCATGCC	GTGTGGAGAAGGTGAGGAGAGGGAGGGACAATCGGAAACCTATGGCATGGGCGGAGTAGGGAAGACAGACAAACAAACTTGATTTCCTCTGCAACAACCTTTTTTGTCTTCCCCACTCACCCATGCCACAACCTTCCGAAAACCCTAACTCCCTCTCCATGCTCTCCCATAT	Contig1354	172	48	49	38	37	50	-78.6	-45.6977	-0.913953
	bpe-miR472-3p.tts.T3C.A18G.AT	22	TTCCCTACTCCGCCCATGCCAT	GTGTGGAGAAGGTGAGGAGAGGGAGGGACAATCGGAAACCTATGGCATGGGCGGAGTAGGGAAGACAGACAAACAAACTTGATTTCCTCTGCAACAACCTTTTTTGTCTTCCCCACTCACCCATGCCACAACCTTCCGAAAACCCTAACTCCCTCTCCATGCTCTCCCATAT	Contig1354	172	48	49	38	37	50	-78.6	-45.6977	-0.913953
	bpe-miR472-3p.tts.T3C.A18G.A	21	TTCCCTACTCCGCCCATGCCA	GTGTGGAGAAGGTGAGGAGAGGGAGGGACAATCGGAAACCTATGGCATGGGCGGAGTAGGGAAGACAGACAAACAAACTTGATTTCCTCTGCAACAACCTTTTTTGTCTTCCCCACTCACCCATGCCACAACCTTCCGAAAACCCTAACTCCCTCTCCATGCTCTCCCATAT	Contig1354	172	48	49	38	37	50	-78.6	-45.6977	-0.913953
	bpe-miR472-3p.T5C.A20G	22	TTTTCCCTACTCCGCCCATGCC	GTGTGGAGAAGGTGAGGAGAGGGAGGGACAATCGGAAACCTATGGCATGGGCGGAGTAGGGAAGACAGACAAACAAACTTGATTTCCTCTGCAACAACCTTTTTTGTCTTCCCCACTCACCCATGCCACAACCTTCCGAAAACCCTAACTCCCTCTCCATGCTCTCCCATAT	Contig1354	172	48	49	38	37	50	-78.6	-45.6977	-0.913953
	bpe-miR472-3p.T5C.A20G.c	21	TTTTCCCTACTCCGCCCATGC	GTGTGGAGAAGGTGAGGAGAGGGAGGGACAATCGGAAACCTATGGCATGGGCGGAGTAGGGAAGACAGACAAACAAACTTGATTTCCTCTGCAACAACCTTTTTTGTCTTCCCCACTCACCCATGCCACAACCTTCCGAAAACCCTAACTCCCTCTCCATGCTCTCCCATAT	Contig1354	172	48	49	38	37	50	-78.6	-45.6977	-0.913953
	bpe-miR472-3p.T3C.A20G	22	TTCTTCCTACTCCGCCCATGCC	GTGTGGAGAAGGTGAGGAGAGGGAGGGACAATCGGAAACCTATGGCATGGGCGGAGTAGGGAAGACAGACAAACAAACTTGATTTCCTCTGCAACAACCTTTTTTGTCTTCCCCACTCACCCATGCCACAACCTTCCGAAAACCCTAACTCCCTCTCCATGCTCTCCCATAT	Contig1354	172	48	49	38	37	50	-78.6	-45.6977	-0.913953
	bpe-miR472-3p.tts.T3A.A18G.A	21	TTACCTACTCCGCCCATGCCA	GTGTGGAGAAGGTGAGGAGAGGGAGGGACAATCGGAAACCTATGGCATGGGCGGAGTAGGGAAGACAGACAAACAAACTTGATTTCCTCTGCAACAACCTTTTTTGTCTTCCCCACTCACCCATGCCACAACCTTCCGAAAACCCTAACTCCCTCTCCATGCTCTCCCATAT	Contig1354	172	48	49	38	37	50	-78.6	-45.6977	-0.913953
bpe-miR157d-3p	bpe-miR157d-3p.TTs.C2A.T3C.C4A.T5G.C6A.T7A.A8G.T9C.G10A.C11T.T12A.T13G.C14A.T15G.G16A.T17G.T20C.c	22	TTGACAGAAGCATAGAGAGCAC	GGGGCTGAAGGTGATGACAGAAGCATAGAGAGCACAAAGGAGTGAGATGCAGGAGTTTGTTGCATATCATCATCTGTGCTCTCTATCTTCTGTCAACACATCACCAGTGCT	Contig374	111	31	22	30	28	45.045	-53.1	-47.8378	-1.062
	bpe-miR157d-3p.TTs.C2A.T3C.C4A.T5G.C6A.T7A.A8G.T9G.G10A.C11T.T12A.T13G.C14A.T15G.G16A.T17G.T20C.c	22	TTGACAGAAGGATAGAGAGCAC	GGGGCTGAAGGTGATGACAGAAGCATAGAGAGCACAAAGGAGTGAGATGCAGGAGTTTGTTGCATATCATCATCTGTGCTCTCTATCTTCTGTCAACACATCACCAGTGCT	Contig374	111	31	22	30	28	45.045	-53.1	-47.8378	-1.062
	bpe-miR157d-3p	21	GCTCTCTATGCTTCTGTCATC	GGGGCTGAAGGTGATGACAGAAGCATAGAGAGCACAAAGGAGTGAGATGCAGGAGTTTGTTGCATATCATCATCTGTGCTCTCTATCTTCTGTCAACACATCACCAGTGCT	Contig374	111	31	22	30	28	45.045	-53.1	-47.8378	-1.062
	bpe-miR157d-3p.GTs.G1T.C2G.T3A.T5A.C6G.T7A.T9G.G10C.C11A.T13A.C14G.T15A.T17A.C18G.A19C.T20A	23	GTTGACAGAAGCATAGAGAGCAC	GGGGCTGAAGGTGATGACAGAAGCATAGAGAGCACAAAGGAGTGAGATGCAGGAGTTTGTTGCATATCATCATCTGTGCTCTCTATCTTCTGTCAACACATCACCAGTGCT	Contig374	111	31	22	30	28	45.045	-53.1	-47.8378	-1.062
	bpe-miR157d-3p.C6T	21	GCTCTTTATGCTTCTGTCATC	GGGGCTGAAGGTGATGACAGAAGCATAGAGAGCACAAAGGAGTGAGATGCAGGAGTTTGTTGCATATCATCATCTGTGCTCTCTATCTTCTGTCAACACATCACCAGTGCT	Contig374	111	31	22	30	28	45.045	-53.1	-47.8378	-1.062
	bpe-miR157d-3p.TTs.C2A.T3C.C4A.C6A.T7A.A8G.T9C.G10A.C11T.T12A.T13G.C14A.T15G.G16A.T17G.T20C.c	22	TTGACATAAGCATAGAGAGCAC	GGGGCTGAAGGTGATGACAGAAGCATAGAGAGCACAAAGGAGTGAGATGCAGGAGTTTGTTGCATATCATCATCTGTGCTCTCTATCTTCTGTCAACACATCACCAGTGCT	Contig374	111	31	22	30	28	45.045	-53.1	-47.8378	-1.062
	bpe-miR157d-3p.GTs.G1T.C2G.T3A.T5A.C6G.T7A.T9G.C11A.T13A.C14G.T15A.T17A.C18G.A19C.T20A	23	GTTGACAGAAGGATAGAGAGCAC	GGGGCTGAAGGTGATGACAGAAGCATAGAGAGCACAAAGGAGTGAGATGCAGGAGTTTGTTGCATATCATCATCTGTGCTCTCTATCTTCTGTCAACACATCACCAGTGCT	Contig374	111	31	22	30	28	45.045	-53.1	-47.8378	-1.062
	bpe-miR157d-3p.Ts.G1T.C2G.T3A.T5A.C6G.T7A.T9G.G10C.C11A.T13A.C14G.T15A.T17A.C18G.A19C.T20A.c	21	TTGACAGAAGCATAGAGAGCA	GGGGCTGAAGGTGATGACAGAAGCATAGAGAGCACAAAGGAGTGAGATGCAGGAGTTTGTTGCATATCATCATCTGTGCTCTCTATCTTCTGTCAACACATCACCAGTGCT	Contig374	111	31	22	30	28	45.045	-53.1	-47.8378	-1.062
	bpe-miR157d-3p.Ts.G1T.C2G.T3A.T5A.C6G.T7A.T9G.C11A.T13A.C14G.T15A.T17A.C18G.A19C.T20A.c	21	TTGACAGAAGGATAGAGAGCA	GGGGCTGAAGGTGATGACAGAAGCATAGAGAGCACAAAGGAGTGAGATGCAGGAGTTTGTTGCATATCATCATCTGTGCTCTCTATCTTCTGTCAACACATCACCAGTGCT	Contig374	111	31	22	30	28	45.045	-53.1	-47.8378	-1.062
bpe-miR403a-3p	bpe-miR403a-3p	21	TTAGATTCACGCACAAACTCG	GAAGAGTCAGATTTCAAGCTTGTGCGTGAATCTAACAACAACCATAACCAAACACCCCCCCCCCCCCCCTTCTGCCCCTCTCTCTCATTGGATGCTGTTAGATTCACGCACAAACTCGTAATATGCCTTTTC	Contig129	132	34	46	18	34	60.6061	-38.69	-29.3106	-0.483625
	bpe-miR403a-3p.AGs.T1C.A3T.A5T.T6G.T7C.C8G.A9T.C10G.G11A.C12A.A13T.A15T.T19A.cg	21	AGCTTGTGCGTGAATCTAACA	GAAGAGTCAGATTTCAAGCTTGTGCGTGAATCTAACAACAACCATAACCAAACACCCCCCCCCCCCCCCTTCTGCCCCTCTCTCTCATTGGATGCTGTTAGATTCACGCACAAACTCGTAATATGCCTTTTC	Contig129	132	34	46	18	34	60.6061	-38.69	-29.3106	-0.483625
	bpe-miR403a-3p.g	20	TTAGATTCACGCACAAACTC	GAAGAGTCAGATTTCAAGCTTGTGCGTGAATCTAACAACAACCATAACCAAACACCCCCCCCCCCCCCCTTCTGCCCCTCTCTCTCATTGGATGCTGTTAGATTCACGCACAAACTCGTAATATGCCTTTTC	Contig129	132	34	46	18	34	60.6061	-38.69	-29.3106	-0.483625
	bpe-miR403a-3p.G21T	21	TTAGATTCACGCACAAACTCT	GAAGAGTCAGATTTCAAGCTTGTGCGTGAATCTAACAACAACCATAACCAAACACCCCCCCCCCCCCCCTTCTGCCCCTCTCTCTCATTGGATGCTGTTAGATTCACGCACAAACTCGTAATATGCCTTTTC	Contig129	132	34	46	18	34	60.6061	-38.69	-29.3106	-0.483625
	bpe-miR403a-3p.TT	23	TTAGATTCACGCACAAACTCGTT	GAAGAGTCAGATTTCAAGCTTGTGCGTGAATCTAACAACAACCATAACCAAACACCCCCCCCCCCCCCCTTCTGCCCCTCTCTCTCATTGGATGCTGTTAGATTCACGCACAAACTCGTAATATGCCTTTTC	Contig129	132	34	46	18	34	60.6061	-38.69	-29.3106	-0.483625
	bpe-miR403a-3p.G21T.T	22	TTAGATTCACGCACAAACTCTT	GAAGAGTCAGATTTCAAGCTTGTGCGTGAATCTAACAACAACCATAACCAAACACCCCCCCCCCCCCCCTTCTGCCCCTCTCTCTCATTGGATGCTGTTAGATTCACGCACAAACTCGTAATATGCCTTTTC	Contig129	132	34	46	18	34	60.6061	-38.69	-29.3106	-0.483625
	bpe-miR403a-3p.cg	19	TTAGATTCACGCACAAACT	GAAGAGTCAGATTTCAAGCTTGTGCGTGAATCTAACAACAACCATAACCAAACACCCCCCCCCCCCCCCTTCTGCCCCTCTCTCTCATTGGATGCTGTTAGATTCACGCACAAACTCGTAATATGCCTTTTC	Contig129	132	34	46	18	34	60.6061	-38.69	-29.3106	-0.483625
	bpe-miR403a-3p.G21T.TT	23	TTAGATTCACGCACAAACTCTTT	GAAGAGTCAGATTTCAAGCTTGTGCGTGAATCTAACAACAACCATAACCAAACACCCCCCCCCCCCCCCTTCTGCCCCTCTCTCTCATTGGATGCTGTTAGATTCACGCACAAACTCGTAATATGCCTTTTC	Contig129	132	34	46	18	34	60.6061	-38.69	-29.3106	-0.483625
	bpe-miR403a-3p.T	22	TTAGATTCACGCACAAACTCGT	GAAGAGTCAGATTTCAAGCTTGTGCGTGAATCTAACAACAACCATAACCAAACACCCCCCCCCCCCCCCTTCTGCCCCTCTCTCTCATTGGATGCTGTTAGATTCACGCACAAACTCGTAATATGCCTTTTC	Contig129	132	34	46	18	34	60.6061	-38.69	-29.3106	-0.483625
	bpe-miR403a-3p.A17T	21	TTAGATTCACGCACAATCTCG	GAAGAGTCAGATTTCAAGCTTGTGCGTGAATCTAACAACAACCATAACCAAACACCCCCCCCCCCCCCCTTCTGCCCCTCTCTCTCATTGGATGCTGTTAGATTCACGCACAAACTCGTAATATGCCTTTTC	Contig129	132	34	46	18	34	60.6061	-38.69	-29.3106	-0.483625
	bpe-miR403a-3p.AGs	23	AGTTAGATTCACGCACAAACTCG	GAAGAGTCAGATTTCAAGCTTGTGCGTGAATCTAACAACAACCATAACCAAACACCCCCCCCCCCCCCCTTCTGCCCCTCTCTCTCATTGGATGCTGTTAGATTCACGCACAAACTCGTAATATGCCTTTTC	Contig129	132	34	46	18	34	60.6061	-38.69	-29.3106	-0.483625
	bpe-miR403a-3p.Gs.g	21	GTTAGATTCACGCACAAACTC	GAAGAGTCAGATTTCAAGCTTGTGCGTGAATCTAACAACAACCATAACCAAACACCCCCCCCCCCCCCCTTCTGCCCCTCTCTCTCATTGGATGCTGTTAGATTCACGCACAAACTCGTAATATGCCTTTTC	Contig129	132	34	46	18	34	60.6061	-38.69	-29.3106	-0.483625
	bpe-miR403a-3p.Gs	22	GTTAGATTCACGCACAAACTCG	GAAGAGTCAGATTTCAAGCTTGTGCGTGAATCTAACAACAACCATAACCAAACACCCCCCCCCCCCCCCTTCTGCCCCTCTCTCTCATTGGATGCTGTTAGATTCACGCACAAACTCGTAATATGCCTTTTC	Contig129	132	34	46	18	34	60.6061	-38.69	-29.3106	-0.483625
	bpe-miR403a-3p.Gs.T	23	GTTAGATTCACGCACAAACTCGT	GAAGAGTCAGATTTCAAGCTTGTGCGTGAATCTAACAACAACCATAACCAAACACCCCCCCCCCCCCCCTTCTGCCCCTCTCTCTCATTGGATGCTGTTAGATTCACGCACAAACTCGTAATATGCCTTTTC	Contig129	132	34	46	18	34	60.6061	-38.69	-29.3106	-0.483625
	bpe-miR403a-3p.Ts.G21C	22	TTTAGATTCACGCACAAACTCC	GAAGAGTCAGATTTCAAGCTTGTGCGTGAATCTAACAACAACCATAACCAAACACCCCCCCCCCCCCCCTTCTGCCCCTCTCTCTCATTGGATGCTGTTAGATTCACGCACAAACTCGTAATATGCCTTTTC	Contig129	132	34	46	18	34	60.6061	-38.69	-29.3106	-0.483625
	bpe-miR403a-3p.A17G.T	22	TTAGATTCACGCACAAGCTCGT	GAAGAGTCAGATTTCAAGCTTGTGCGTGAATCTAACAACAACCATAACCAAACACCCCCCCCCCCCCCCTTCTGCCCCTCTCTCTCATTGGATGCTGTTAGATTCACGCACAAACTCGTAATATGCCTTTTC	Contig129	132	34	46	18	34	60.6061	-38.69	-29.3106	-0.483625
	bpe-miR403a-3p.TA	23	TTAGATTCACGCACAAACTCGTA	GAAGAGTCAGATTTCAAGCTTGTGCGTGAATCTAACAACAACCATAACCAAACACCCCCCCCCCCCCCCTTCTGCCCCTCTCTCTCATTGGATGCTGTTAGATTCACGCACAAACTCGTAATATGCCTTTTC	Contig129	132	34	46	18	34	60.6061	-38.69	-29.3106	-0.483625
	bpe-miR403a-3p.C20A.G21C	21	TTAGATTCACGCACAAACTAC	GAAGAGTCAGATTTCAAGCTTGTGCGTGAATCTAACAACAACCATAACCAAACACCCCCCCCCCCCCCCTTCTGCCCCTCTCTCTCATTGGATGCTGTTAGATTCACGCACAAACTCGTAATATGCCTTTTC	Contig129	132	34	46	18	34	60.6061	-38.69	-29.3106	-0.483625
	bpe-miR403a-3p.TC	23	TTAGATTCACGCACAAACTCGTC	GAAGAGTCAGATTTCAAGCTTGTGCGTGAATCTAACAACAACCATAACCAAACACCCCCCCCCCCCCCCTTCTGCCCCTCTCTCTCATTGGATGCTGTTAGATTCACGCACAAACTCGTAATATGCCTTTTC	Contig129	132	34	46	18	34	60.6061	-38.69	-29.3106	-0.483625
	bpe-miR403a-3p.C12A	21	TTAGATTCACGAACAAACTCG	GAAGAGTCAGATTTCAAGCTTGTGCGTGAATCTAACAACAACCATAACCAAACACCCCCCCCCCCCCCCTTCTGCCCCTCTCTCTCATTGGATGCTGTTAGATTCACGCACAAACTCGTAATATGCCTTTTC	Contig129	132	34	46	18	34	60.6061	-38.69	-29.3106	-0.483625
	bpe-miR403a-3p.A	22	TTAGATTCACGCACAAACTCGA	GAAGAGTCAGATTTCAAGCTTGTGCGTGAATCTAACAACAACCATAACCAAACACCCCCCCCCCCCCCCTTCTGCCCCTCTCTCTCATTGGATGCTGTTAGATTCACGCACAAACTCGTAATATGCCTTTTC	Contig129	132	34	46	18	34	60.6061	-38.69	-29.3106	-0.483625
	bpe-miR403a-3p.G21T.TC	23	TTAGATTCACGCACAAACTCTTC	GAAGAGTCAGATTTCAAGCTTGTGCGTGAATCTAACAACAACCATAACCAAACACCCCCCCCCCCCCCCTTCTGCCCCTCTCTCTCATTGGATGCTGTTAGATTCACGCACAAACTCGTAATATGCCTTTTC	Contig129	132	34	46	18	34	60.6061	-38.69	-29.3106	-0.483625
	bpe-miR403a-3p.T1A.T2G.A3C.G4T.A5T.T6G.C8G.A9C.C10G.G11T.C12G.C14A.A15T.A16C.A17T.C18A.T19A.cg	19	AGCTTGTGCGTGAATCTAA	GAAGAGTCAGATTTCAAGCTTGTGCGTGAATCTAACAACAACCATAACCAAACACCCCCCCCCCCCCCCTTCTGCCCCTCTCTCTCATTGGATGCTGTTAGATTCACGCACAAACTCGTAATATGCCTTTTC	Contig129	132	34	46	18	34	60.6061	-38.69	-29.3106	-0.483625
	bpe-miR403a-3p.G21T.CT	23	TTAGATTCACGCACAAACTCTCT	GAAGAGTCAGATTTCAAGCTTGTGCGTGAATCTAACAACAACCATAACCAAACACCCCCCCCCCCCCCCTTCTGCCCCTCTCTCTCATTGGATGCTGTTAGATTCACGCACAAACTCGTAATATGCCTTTTC	Contig129	132	34	46	18	34	60.6061	-38.69	-29.3106	-0.483625
	bpe-miR403a-3p.ts.T1A.A2G.G3C.A4T.T6G.C7T.A8G.C11T.A12G.C13A.A15T.A16C.C17T.T18A.cg	18	AGCTTGTGCGTGAATCTA	GAAGAGTCAGATTTCAAGCTTGTGCGTGAATCTAACAACAACCATAACCAAACACCCCCCCCCCCCCCCTTCTGCCCCTCTCTCTCATTGGATGCTGTTAGATTCACGCACAAACTCGTAATATGCCTTTTC	Contig129	132	34	46	18	34	60.6061	-38.69	-29.3106	-0.483625
	bpe-miR403a-3p.ts	20	TAGATTCACGCACAAACTCG	GAAGAGTCAGATTTCAAGCTTGTGCGTGAATCTAACAACAACCATAACCAAACACCCCCCCCCCCCCCCTTCTGCCCCTCTCTCTCATTGGATGCTGTTAGATTCACGCACAAACTCGTAATATGCCTTTTC	Contig129	132	34	46	18	34	60.6061	-38.69	-29.3106	-0.483625
bpe-miR166h-3p	bpe-miR166h-3p	21	TCTCGGACCAGGCTTCATTCC	GGTTGAGAGGAATGTTGTCTGGCTCGAGGTCATGGAGGATTTATATATATGTATATTTTTTCATATAATTGGAGACCCTAAATGATTCTCGGACCAGGCTTCATTCCCCCCAACC	Contig2096	115	29	22	26	38	52.1739	44.5	38.6957	0.741667	GGGGAATGTTGTCTGGCTCGAGGCCACCAATAGACTGAATGATGACGTTCAGTTTGAGAGAGTTTTCTCGGACCAGGCTTCATTCCCC	Contig1055	88	19	20	25	24	51.1364	-43.8	-49.7727	-0.973333	GGTTGAGGGGAATGCTGTCTGGTTCGAGACCATTTCTCAGAAGCAAAAACAGAGCATCTTTCAAATGATCTCGGACCAGGCTTCATTCCCCCCCAACT	Contig1270	98	26	26	22	24	48.9796	-49.4	-50.4082	-1.02917												GTTGAGGGGAATGAAGCCTGGTCCGAAATCATTCAGATGAGCTTATACTTTGCATGAATGATCTCGAACCAGACGACATTCCCCTCAAC	Contig50
	bpe-miR166h-3p.C21T	21	TCTCGGACCAGGCTTCATTCT	GGTTGAGAGGAATGTTGTCTGGCTCGAGGTCATGGAGGATTTATATATATGTATATTTTTTCATATAATTGGAGACCCTAAATGATTCTCGGACCAGGCTTCATTCCCCCCAACC	Contig2096	115	29	22	26	38	52.1739	44.5	38.6957	0.741667	GGGGAATGTTGTCTGGCTCGAGGCCACCAATAGACTGAATGATGACGTTCAGTTTGAGAGAGTTTTCTCGGACCAGGCTTCATTCCCC	Contig1055	88	19	20	25	24	51.1364	-43.8	-49.7727	-0.973333	GGTTGAGGGGAATGCTGTCTGGTTCGAGACCATTTCTCAGAAGCAAAAACAGAGCATCTTTCAAATGATCTCGGACCAGGCTTCATTCCCCCCCAACT	Contig1270	98	26	26	22	24	48.9796	-49.4	-50.4082	-1.02917												GTTGAGGGGAATGAAGCCTGGTCCGAAATCATTCAGATGAGCTTATACTTTGCATGAATGATCTCGAACCAGACGACATTCCCCTCAAC	Contig50
	bpe-miR166h-3p.C20T.C21T	21	TCTCGGACCAGGCTTCATTTT	GGTTGAGAGGAATGTTGTCTGGCTCGAGGTCATGGAGGATTTATATATATGTATATTTTTTCATATAATTGGAGACCCTAAATGATTCTCGGACCAGGCTTCATTCCCCCCAACC	Contig2096	115	29	22	26	38	52.1739	44.5	38.6957	0.741667	GGGGAATGTTGTCTGGCTCGAGGCCACCAATAGACTGAATGATGACGTTCAGTTTGAGAGAGTTTTCTCGGACCAGGCTTCATTCCCC	Contig1055	88	19	20	25	24	51.1364	-43.8	-49.7727	-0.973333	GGTTGAGGGGAATGCTGTCTGGTTCGAGACCATTTCTCAGAAGCAAAAACAGAGCATCTTTCAAATGATCTCGGACCAGGCTTCATTCCCCCCCAACT	Contig1270	98	26	26	22	24	48.9796	-49.4	-50.4082	-1.02917												GTTGAGGGGAATGAAGCCTGGTCCGAAATCATTCAGATGAGCTTATACTTTGCATGAATGATCTCGAACCAGACGACATTCCCCTCAAC	Contig50
	bpe-miR166h-3p.T	22	TCTCGGACCAGGCTTCATTCCT	GGTTGAGAGGAATGTTGTCTGGCTCGAGGTCATGGAGGATTTATATATATGTATATTTTTTCATATAATTGGAGACCCTAAATGATTCTCGGACCAGGCTTCATTCCCCCCAACC	Contig2096	115	29	22	26	38	52.1739	44.5	38.6957	0.741667	GGGGAATGTTGTCTGGCTCGAGGCCACCAATAGACTGAATGATGACGTTCAGTTTGAGAGAGTTTTCTCGGACCAGGCTTCATTCCCC	Contig1055	88	19	20	25	24	51.1364	-43.8	-49.7727	-0.973333	GGTTGAGGGGAATGCTGTCTGGTTCGAGACCATTTCTCAGAAGCAAAAACAGAGCATCTTTCAAATGATCTCGGACCAGGCTTCATTCCCCCCCAACT	Contig1270	98	26	26	22	24	48.9796	-49.4	-50.4082	-1.02917												GTTGAGGGGAATGAAGCCTGGTCCGAAATCATTCAGATGAGCTTATACTTTGCATGAATGATCTCGAACCAGACGACATTCCCCTCAAC	Contig50
	bpe-miR166h-3p.cc	19	TCTCGGACCAGGCTTCATT	GGTTGAGAGGAATGTTGTCTGGCTCGAGGTCATGGAGGATTTATATATATGTATATTTTTTCATATAATTGGAGACCCTAAATGATTCTCGGACCAGGCTTCATTCCCCCCAACC	Contig2096	115	29	22	26	38	52.1739	44.5	38.6957	0.741667	GGGGAATGTTGTCTGGCTCGAGGCCACCAATAGACTGAATGATGACGTTCAGTTTGAGAGAGTTTTCTCGGACCAGGCTTCATTCCCC	Contig1055	88	19	20	25	24	51.1364	-43.8	-49.7727	-0.973333	GGTTGAGGGGAATGCTGTCTGGTTCGAGACCATTTCTCAGAAGCAAAAACAGAGCATCTTTCAAATGATCTCGGACCAGGCTTCATTCCCCCCCAACT	Contig1270	98	26	26	22	24	48.9796	-49.4	-50.4082	-1.02917												GTTGAGGGGAATGAAGCCTGGTCCGAAATCATTCAGATGAGCTTATACTTTGCATGAATGATCTCGAACCAGACGACATTCCCCTCAAC	Contig50
	bpe-miR166h-3p.C20T.C21T.T	22	TCTCGGACCAGGCTTCATTTTT	GGTTGAGAGGAATGTTGTCTGGCTCGAGGTCATGGAGGATTTATATATATGTATATTTTTTCATATAATTGGAGACCCTAAATGATTCTCGGACCAGGCTTCATTCCCCCCAACC	Contig2096	115	29	22	26	38	52.1739	44.5	38.6957	0.741667	GGGGAATGTTGTCTGGCTCGAGGCCACCAATAGACTGAATGATGACGTTCAGTTTGAGAGAGTTTTCTCGGACCAGGCTTCATTCCCC	Contig1055	88	19	20	25	24	51.1364	-43.8	-49.7727	-0.973333	GGTTGAGGGGAATGCTGTCTGGTTCGAGACCATTTCTCAGAAGCAAAAACAGAGCATCTTTCAAATGATCTCGGACCAGGCTTCATTCCCCCCCAACT	Contig1270	98	26	26	22	24	48.9796	-49.4	-50.4082	-1.02917												GTTGAGGGGAATGAAGCCTGGTCCGAAATCATTCAGATGAGCTTATACTTTGCATGAATGATCTCGAACCAGACGACATTCCCCTCAAC	Contig50
	bpe-miR166h-3p.C21T.T	22	TCTCGGACCAGGCTTCATTCTT	GGTTGAGAGGAATGTTGTCTGGCTCGAGGTCATGGAGGATTTATATATATGTATATTTTTTCATATAATTGGAGACCCTAAATGATTCTCGGACCAGGCTTCATTCCCCCCAACC	Contig2096	115	29	22	26	38	52.1739	44.5	38.6957	0.741667	GGGGAATGTTGTCTGGCTCGAGGCCACCAATAGACTGAATGATGACGTTCAGTTTGAGAGAGTTTTCTCGGACCAGGCTTCATTCCCC	Contig1055	88	19	20	25	24	51.1364	-43.8	-49.7727	-0.973333	GGTTGAGGGGAATGCTGTCTGGTTCGAGACCATTTCTCAGAAGCAAAAACAGAGCATCTTTCAAATGATCTCGGACCAGGCTTCATTCCCCCCCAACT	Contig1270	98	26	26	22	24	48.9796	-49.4	-50.4082	-1.02917												GTTGAGGGGAATGAAGCCTGGTCCGAAATCATTCAGATGAGCTTATACTTTGCATGAATGATCTCGAACCAGACGACATTCCCCTCAAC	Contig50
	bpe-miR166h-3p.G	22	TCTCGGACCAGGCTTCATTCCG	GGTTGAGAGGAATGTTGTCTGGCTCGAGGTCATGGAGGATTTATATATATGTATATTTTTTCATATAATTGGAGACCCTAAATGATTCTCGGACCAGGCTTCATTCCCCCCAACC	Contig2096	115	29	22	26	38	52.1739	44.5	38.6957	0.741667	GGGGAATGTTGTCTGGCTCGAGGCCACCAATAGACTGAATGATGACGTTCAGTTTGAGAGAGTTTTCTCGGACCAGGCTTCATTCCCC	Contig1055	88	19	20	25	24	51.1364	-43.8	-49.7727	-0.973333	GGTTGAGGGGAATGCTGTCTGGTTCGAGACCATTTCTCAGAAGCAAAAACAGAGCATCTTTCAAATGATCTCGGACCAGGCTTCATTCCCCCCCAACT	Contig1270	98	26	26	22	24	48.9796	-49.4	-50.4082	-1.02917												GTTGAGGGGAATGAAGCCTGGTCCGAAATCATTCAGATGAGCTTATACTTTGCATGAATGATCTCGAACCAGACGACATTCCCCTCAAC	Contig50
	bpe-miR166h-3p.T1G	21	GCTCGGACCAGGCTTCATTCC	GGTTGAGAGGAATGTTGTCTGGCTCGAGGTCATGGAGGATTTATATATATGTATATTTTTTCATATAATTGGAGACCCTAAATGATTCTCGGACCAGGCTTCATTCCCCCCAACC	Contig2096	115	29	22	26	38	52.1739	44.5	38.6957	0.741667	GGGGAATGTTGTCTGGCTCGAGGCCACCAATAGACTGAATGATGACGTTCAGTTTGAGAGAGTTTTCTCGGACCAGGCTTCATTCCCC	Contig1055	88	19	20	25	24	51.1364	-43.8	-49.7727	-0.973333	GGTTGAGGGGAATGCTGTCTGGTTCGAGACCATTTCTCAGAAGCAAAAACAGAGCATCTTTCAAATGATCTCGGACCAGGCTTCATTCCCCCCCAACT	Contig1270	98	26	26	22	24	48.9796	-49.4	-50.4082	-1.02917												GTTGAGGGGAATGAAGCCTGGTCCGAAATCATTCAGATGAGCTTATACTTTGCATGAATGATCTCGAACCAGACGACATTCCCCTCAAC	Contig50
	bpe-miR166h-3p.G12T	21	TCTCGGACCAGTCTTCATTCC	GGTTGAGAGGAATGTTGTCTGGCTCGAGGTCATGGAGGATTTATATATATGTATATTTTTTCATATAATTGGAGACCCTAAATGATTCTCGGACCAGGCTTCATTCCCCCCAACC	Contig2096	115	29	22	26	38	52.1739	44.5	38.6957	0.741667	GGGGAATGTTGTCTGGCTCGAGGCCACCAATAGACTGAATGATGACGTTCAGTTTGAGAGAGTTTTCTCGGACCAGGCTTCATTCCCC	Contig1055	88	19	20	25	24	51.1364	-43.8	-49.7727	-0.973333	GGTTGAGGGGAATGCTGTCTGGTTCGAGACCATTTCTCAGAAGCAAAAACAGAGCATCTTTCAAATGATCTCGGACCAGGCTTCATTCCCCCCCAACT	Contig1270	98	26	26	22	24	48.9796	-49.4	-50.4082	-1.02917												GTTGAGGGGAATGAAGCCTGGTCCGAAATCATTCAGATGAGCTTATACTTTGCATGAATGATCTCGAACCAGACGACATTCCCCTCAAC	Contig50
	bpe-miR166h-3p.T18A.T	22	TCTCGGACCAGGCTTCAATCCT	GGTTGAGAGGAATGTTGTCTGGCTCGAGGTCATGGAGGATTTATATATATGTATATTTTTTCATATAATTGGAGACCCTAAATGATTCTCGGACCAGGCTTCATTCCCCCCAACC	Contig2096	115	29	22	26	38	52.1739	44.5	38.6957	0.741667	GGGGAATGTTGTCTGGCTCGAGGCCACCAATAGACTGAATGATGACGTTCAGTTTGAGAGAGTTTTCTCGGACCAGGCTTCATTCCCC	Contig1055	88	19	20	25	24	51.1364	-43.8	-49.7727	-0.973333	GGTTGAGGGGAATGCTGTCTGGTTCGAGACCATTTCTCAGAAGCAAAAACAGAGCATCTTTCAAATGATCTCGGACCAGGCTTCATTCCCCCCCAACT	Contig1270	98	26	26	22	24	48.9796	-49.4	-50.4082	-1.02917												GTTGAGGGGAATGAAGCCTGGTCCGAAATCATTCAGATGAGCTTATACTTTGCATGAATGATCTCGAACCAGACGACATTCCCCTCAAC	Contig50
	bpe-miR166h-3p.C20T	21	TCTCGGACCAGGCTTCATTTC	GGTTGAGAGGAATGTTGTCTGGCTCGAGGTCATGGAGGATTTATATATATGTATATTTTTTCATATAATTGGAGACCCTAAATGATTCTCGGACCAGGCTTCATTCCCCCCAACC	Contig2096	115	29	22	26	38	52.1739	44.5	38.6957	0.741667	GGGGAATGTTGTCTGGCTCGAGGCCACCAATAGACTGAATGATGACGTTCAGTTTGAGAGAGTTTTCTCGGACCAGGCTTCATTCCCC	Contig1055	88	19	20	25	24	51.1364	-43.8	-49.7727	-0.973333	GGTTGAGGGGAATGCTGTCTGGTTCGAGACCATTTCTCAGAAGCAAAAACAGAGCATCTTTCAAATGATCTCGGACCAGGCTTCATTCCCCCCCAACT	Contig1270	98	26	26	22	24	48.9796	-49.4	-50.4082	-1.02917												GTTGAGGGGAATGAAGCCTGGTCCGAAATCATTCAGATGAGCTTATACTTTGCATGAATGATCTCGAACCAGACGACATTCCCCTCAAC	Contig50
	bpe-miR166h-3p.C20T.T	22	TCTCGGACCAGGCTTCATTTCT	GGTTGAGAGGAATGTTGTCTGGCTCGAGGTCATGGAGGATTTATATATATGTATATTTTTTCATATAATTGGAGACCCTAAATGATTCTCGGACCAGGCTTCATTCCCCCCAACC	Contig2096	115	29	22	26	38	52.1739	44.5	38.6957	0.741667	GGGGAATGTTGTCTGGCTCGAGGCCACCAATAGACTGAATGATGACGTTCAGTTTGAGAGAGTTTTCTCGGACCAGGCTTCATTCCCC	Contig1055	88	19	20	25	24	51.1364	-43.8	-49.7727	-0.973333	GGTTGAGGGGAATGCTGTCTGGTTCGAGACCATTTCTCAGAAGCAAAAACAGAGCATCTTTCAAATGATCTCGGACCAGGCTTCATTCCCCCCCAACT	Contig1270	98	26	26	22	24	48.9796	-49.4	-50.4082	-1.02917												GTTGAGGGGAATGAAGCCTGGTCCGAAATCATTCAGATGAGCTTATACTTTGCATGAATGATCTCGAACCAGACGACATTCCCCTCAAC	Contig50
	bpe-miR166h-3p.G6T	21	TCTCGTACCAGGCTTCATTCC	GGTTGAGAGGAATGTTGTCTGGCTCGAGGTCATGGAGGATTTATATATATGTATATTTTTTCATATAATTGGAGACCCTAAATGATTCTCGGACCAGGCTTCATTCCCCCCAACC	Contig2096	115	29	22	26	38	52.1739	44.5	38.6957	0.741667	GGGGAATGTTGTCTGGCTCGAGGCCACCAATAGACTGAATGATGACGTTCAGTTTGAGAGAGTTTTCTCGGACCAGGCTTCATTCCCC	Contig1055	88	19	20	25	24	51.1364	-43.8	-49.7727	-0.973333	GGTTGAGGGGAATGCTGTCTGGTTCGAGACCATTTCTCAGAAGCAAAAACAGAGCATCTTTCAAATGATCTCGGACCAGGCTTCATTCCCCCCCAACT	Contig1270	98	26	26	22	24	48.9796	-49.4	-50.4082	-1.02917												GTTGAGGGGAATGAAGCCTGGTCCGAAATCATTCAGATGAGCTTATACTTTGCATGAATGATCTCGAACCAGACGACATTCCCCTCAAC	Contig50
	bpe-miR166h-3p.A	22	TCTCGGACCAGGCTTCATTCCA	GGTTGAGAGGAATGTTGTCTGGCTCGAGGTCATGGAGGATTTATATATATGTATATTTTTTCATATAATTGGAGACCCTAAATGATTCTCGGACCAGGCTTCATTCCCCCCAACC	Contig2096	115	29	22	26	38	52.1739	44.5	38.6957	0.741667	GGGGAATGTTGTCTGGCTCGAGGCCACCAATAGACTGAATGATGACGTTCAGTTTGAGAGAGTTTTCTCGGACCAGGCTTCATTCCCC	Contig1055	88	19	20	25	24	51.1364	-43.8	-49.7727	-0.973333	GGTTGAGGGGAATGCTGTCTGGTTCGAGACCATTTCTCAGAAGCAAAAACAGAGCATCTTTCAAATGATCTCGGACCAGGCTTCATTCCCCCCCAACT	Contig1270	98	26	26	22	24	48.9796	-49.4	-50.4082	-1.02917												GTTGAGGGGAATGAAGCCTGGTCCGAAATCATTCAGATGAGCTTATACTTTGCATGAATGATCTCGAACCAGACGACATTCCCCTCAAC	Contig50
	bpe-miR166h-3p.C20T.C21T.C	22	TCTCGGACCAGGCTTCATTTTC	GGTTGAGAGGAATGTTGTCTGGCTCGAGGTCATGGAGGATTTATATATATGTATATTTTTTCATATAATTGGAGACCCTAAATGATTCTCGGACCAGGCTTCATTCCCCCCAACC	Contig2096	115	29	22	26	38	52.1739	44.5	38.6957	0.741667	GGGGAATGTTGTCTGGCTCGAGGCCACCAATAGACTGAATGATGACGTTCAGTTTGAGAGAGTTTTCTCGGACCAGGCTTCATTCCCC	Contig1055	88	19	20	25	24	51.1364	-43.8	-49.7727	-0.973333	GGTTGAGGGGAATGCTGTCTGGTTCGAGACCATTTCTCAGAAGCAAAAACAGAGCATCTTTCAAATGATCTCGGACCAGGCTTCATTCCCCCCCAACT	Contig1270	98	26	26	22	24	48.9796	-49.4	-50.4082	-1.02917												GTTGAGGGGAATGAAGCCTGGTCCGAAATCATTCAGATGAGCTTATACTTTGCATGAATGATCTCGAACCAGACGACATTCCCCTCAAC	Contig50
bpe-miR2118a-3p	bpe-miR2118a-3p.T8C.A12C	21	TTGCCGACTCCCCCCATTCCT	GGGAGGAGAGGGGAAAGAGAGGAACCAAAGGAAATCCTTGGAATGGGGGGAGTCGGCAAAGGGAAGTGGCCCTGAAAGAGAGAGACACGATGATTTCTTTGCCGGCCCTCCCATGTCCAAAAACTTCCTCCAGCTTCATCTCCCTTTCCCCCTTCTCTC	Contig438	159	42	41	45	31	45.283	-74.3	-46.7296	-1.03194
	bpe-miR2118a-3p.Ts.T8C.A12C.t	21	TTTGCCGACTCCCCCCATTCC	GGGAGGAGAGGGGAAAGAGAGGAACCAAAGGAAATCCTTGGAATGGGGGGAGTCGGCAAAGGGAAGTGGCCCTGAAAGAGAGAGACACGATGATTTCTTTGCCGGCCCTCCCATGTCCAAAAACTTCCTCCAGCTTCATCTCCCTTTCCCCCTTCTCTC	Contig438	159	42	41	45	31	45.283	-74.3	-46.7296	-1.03194
bpe-miR403a	bpe-miR403a.tg	19	TTAGATTCACGCACAAACT	GAAGAGTCAGATTTCAAGCTTGTGCGTGAATCTAACAACAACCATAACCAAACACCCCCCCCCCCCCCCTTCTGCCCCTCTCTCTCATTGGATGCTGTTAGATTCACGCACAAACTCGTAATATGCCTTTTC	Contig129	132	34	46	18	34	60.6061	-38.69	-29.3106	-0.483625
	bpe-miR403a.g	20	TTAGATTCACGCACAAACTT	GAAGAGTCAGATTTCAAGCTTGTGCGTGAATCTAACAACAACCATAACCAAACACCCCCCCCCCCCCCCTTCTGCCCCTCTCTCTCATTGGATGCTGTTAGATTCACGCACAAACTCGTAATATGCCTTTTC	Contig129	132	34	46	18	34	60.6061	-38.69	-29.3106	-0.483625
	bpe-miR403a.G21T	21	TTAGATTCACGCACAAACTTT	GAAGAGTCAGATTTCAAGCTTGTGCGTGAATCTAACAACAACCATAACCAAACACCCCCCCCCCCCCCCTTCTGCCCCTCTCTCTCATTGGATGCTGTTAGATTCACGCACAAACTCGTAATATGCCTTTTC	Contig129	132	34	46	18	34	60.6061	-38.69	-29.3106	-0.483625
	bpe-miR403a.As.T1G.T2C.A3T.G4T.A5G.T7G.A9G.C10T.C12A.C14T.A15C.A16T.C18A.T19C.tg	20	AGCTTGTGCGTGAATCTAAC	GAAGAGTCAGATTTCAAGCTTGTGCGTGAATCTAACAACAACCATAACCAAACACCCCCCCCCCCCCCCTTCTGCCCCTCTCTCTCATTGGATGCTGTTAGATTCACGCACAAACTCGTAATATGCCTTTTC	Contig129	132	34	46	18	34	60.6061	-38.69	-29.3106	-0.483625
	bpe-miR403a.G21T.T	22	TTAGATTCACGCACAAACTTTT	GAAGAGTCAGATTTCAAGCTTGTGCGTGAATCTAACAACAACCATAACCAAACACCCCCCCCCCCCCCCTTCTGCCCCTCTCTCTCATTGGATGCTGTTAGATTCACGCACAAACTCGTAATATGCCTTTTC	Contig129	132	34	46	18	34	60.6061	-38.69	-29.3106	-0.483625
	bpe-miR403a.G21T.TT	23	TTAGATTCACGCACAAACTTTTT	GAAGAGTCAGATTTCAAGCTTGTGCGTGAATCTAACAACAACCATAACCAAACACCCCCCCCCCCCCCCTTCTGCCCCTCTCTCTCATTGGATGCTGTTAGATTCACGCACAAACTCGTAATATGCCTTTTC	Contig129	132	34	46	18	34	60.6061	-38.69	-29.3106	-0.483625
	bpe-miR403a.T20C.TC	23	TTAGATTCACGCACAAACTCGTC	GAAGAGTCAGATTTCAAGCTTGTGCGTGAATCTAACAACAACCATAACCAAACACCCCCCCCCCCCCCCTTCTGCCCCTCTCTCTCATTGGATGCTGTTAGATTCACGCACAAACTCGTAATATGCCTTTTC	Contig129	132	34	46	18	34	60.6061	-38.69	-29.3106	-0.483625
	bpe-miR403a.G21C.G	22	TTAGATTCACGCACAAACTTCG	GAAGAGTCAGATTTCAAGCTTGTGCGTGAATCTAACAACAACCATAACCAAACACCCCCCCCCCCCCCCTTCTGCCCCTCTCTCTCATTGGATGCTGTTAGATTCACGCACAAACTCGTAATATGCCTTTTC	Contig129	132	34	46	18	34	60.6061	-38.69	-29.3106	-0.483625
	bpe-miR403a.T20A.G21C	21	TTAGATTCACGCACAAACTAC	GAAGAGTCAGATTTCAAGCTTGTGCGTGAATCTAACAACAACCATAACCAAACACCCCCCCCCCCCCCCTTCTGCCCCTCTCTCTCATTGGATGCTGTTAGATTCACGCACAAACTCGTAATATGCCTTTTC	Contig129	132	34	46	18	34	60.6061	-38.69	-29.3106	-0.483625
	bpe-miR403a.A17G.g	20	TTAGATTCACGCACAAGCTT	GAAGAGTCAGATTTCAAGCTTGTGCGTGAATCTAACAACAACCATAACCAAACACCCCCCCCCCCCCCCTTCTGCCCCTCTCTCTCATTGGATGCTGTTAGATTCACGCACAAACTCGTAATATGCCTTTTC	Contig129	132	34	46	18	34	60.6061	-38.69	-29.3106	-0.483625
	bpe-miR403a.T20C.G21T.TC	23	TTAGATTCACGCACAAACTCTTC	GAAGAGTCAGATTTCAAGCTTGTGCGTGAATCTAACAACAACCATAACCAAACACCCCCCCCCCCCCCCTTCTGCCCCTCTCTCTCATTGGATGCTGTTAGATTCACGCACAAACTCGTAATATGCCTTTTC	Contig129	132	34	46	18	34	60.6061	-38.69	-29.3106	-0.483625
	bpe-miR403a.T1A.T2G.A3C.G4T.A5T.T6G.C8G.A9C.C10G.G11T.C12G.C14A.A15T.A16C.A17T.C18A.T19A.tg	19	AGCTTGTGCGTGAATCTAA	GAAGAGTCAGATTTCAAGCTTGTGCGTGAATCTAACAACAACCATAACCAAACACCCCCCCCCCCCCCCTTCTGCCCCTCTCTCTCATTGGATGCTGTTAGATTCACGCACAAACTCGTAATATGCCTTTTC	Contig129	132	34	46	18	34	60.6061	-38.69	-29.3106	-0.483625
	bpe-miR403a.C18T.g	20	TTAGATTCACGCACAAATTT	GAAGAGTCAGATTTCAAGCTTGTGCGTGAATCTAACAACAACCATAACCAAACACCCCCCCCCCCCCCCTTCTGCCCCTCTCTCTCATTGGATGCTGTTAGATTCACGCACAAACTCGTAATATGCCTTTTC	Contig129	132	34	46	18	34	60.6061	-38.69	-29.3106	-0.483625
	bpe-miR403a.T20A.G21C.T	22	TTAGATTCACGCACAAACTACT	GAAGAGTCAGATTTCAAGCTTGTGCGTGAATCTAACAACAACCATAACCAAACACCCCCCCCCCCCCCCTTCTGCCCCTCTCTCTCATTGGATGCTGTTAGATTCACGCACAAACTCGTAATATGCCTTTTC	Contig129	132	34	46	18	34	60.6061	-38.69	-29.3106	-0.483625
	bpe-miR403a.ts.T1A.A2G.G3C.A4T.T6G.C7T.A8G.C11T.A12G.C13A.A15T.A16C.C17T.T18A.tg	18	AGCTTGTGCGTGAATCTA	GAAGAGTCAGATTTCAAGCTTGTGCGTGAATCTAACAACAACCATAACCAAACACCCCCCCCCCCCCCCTTCTGCCCCTCTCTCTCATTGGATGCTGTTAGATTCACGCACAAACTCGTAATATGCCTTTTC	Contig129	132	34	46	18	34	60.6061	-38.69	-29.3106	-0.483625
bpe-miR5368	bpe-miR5368	19	GGACAGTCTCAGGTAGACA	CAATGATGAAGCATTGTCTATCTATGATAGCCCTACTCAATACACTAGAGGTTCTAGGTGCTGAGATTGATGGTGAGTCTCAGGTAGACATGATTCTACAGTCGTTG	Contig1188	107	29	19	26	33	48.5981	-33.8	-31.5888	-0.65
	bpe-miR5368.AAs	21	AAGGACAGTCTCAGGTAGACA	CAATGATGAAGCATTGTCTATCTATGATAGCCCTACTCAATACACTAGAGGTTCTAGGTGCTGAGATTGATGGTGAGTCTCAGGTAGACATGATTCTACAGTCGTTG	Contig1188	107	29	19	26	33	48.5981	-33.8	-31.5888	-0.65
	bpe-miR5368.As.ca	18	AGGACAGTCTCAGGTAGA	CAATGATGAAGCATTGTCTATCTATGATAGCCCTACTCAATACACTAGAGGTTCTAGGTGCTGAGATTGATGGTGAGTCTCAGGTAGACATGATTCTACAGTCGTTG	Contig1188	107	29	19	26	33	48.5981	-33.8	-31.5888	-0.65
	bpe-miR5368.As.Gs	21	AGGGACAGTCTCAGGTAGACA	CAATGATGAAGCATTGTCTATCTATGATAGCCCTACTCAATACACTAGAGGTTCTAGGTGCTGAGATTGATGGTGAGTCTCAGGTAGACATGATTCTACAGTCGTTG	Contig1188	107	29	19	26	33	48.5981	-33.8	-31.5888	-0.65
	bpe-miR5368.As.Gs.a	20	AGGGACAGTCTCAGGTAGAC	CAATGATGAAGCATTGTCTATCTATGATAGCCCTACTCAATACACTAGAGGTTCTAGGTGCTGAGATTGATGGTGAGTCTCAGGTAGACATGATTCTACAGTCGTTG	Contig1188	107	29	19	26	33	48.5981	-33.8	-31.5888	-0.65
	bpe-miR5368.As.Gs.ca	19	AGGGACAGTCTCAGGTAGA	CAATGATGAAGCATTGTCTATCTATGATAGCCCTACTCAATACACTAGAGGTTCTAGGTGCTGAGATTGATGGTGAGTCTCAGGTAGACATGATTCTACAGTCGTTG	Contig1188	107	29	19	26	33	48.5981	-33.8	-31.5888	-0.65
	bpe-miR5368.As.Gs.GT	23	AGGGACAGTCTCAGGTAGACAGT	CAATGATGAAGCATTGTCTATCTATGATAGCCCTACTCAATACACTAGAGGTTCTAGGTGCTGAGATTGATGGTGAGTCTCAGGTAGACATGATTCTACAGTCGTTG	Contig1188	107	29	19	26	33	48.5981	-33.8	-31.5888	-0.65
	bpe-miR5368.As.Gs.GTT	24	AGGGACAGTCTCAGGTAGACAGTT	CAATGATGAAGCATTGTCTATCTATGATAGCCCTACTCAATACACTAGAGGTTCTAGGTGCTGAGATTGATGGTGAGTCTCAGGTAGACATGATTCTACAGTCGTTG	Contig1188	107	29	19	26	33	48.5981	-33.8	-31.5888	-0.65
	bpe-miR5368.As.Gs.GTTT	25	AGGGACAGTCTCAGGTAGACAGTTT	CAATGATGAAGCATTGTCTATCTATGATAGCCCTACTCAATACACTAGAGGTTCTAGGTGCTGAGATTGATGGTGAGTCTCAGGTAGACATGATTCTACAGTCGTTG	Contig1188	107	29	19	26	33	48.5981	-33.8	-31.5888	-0.65
	bpe-miR5368.ca	17	GGACAGTCTCAGGTAGA	CAATGATGAAGCATTGTCTATCTATGATAGCCCTACTCAATACACTAGAGGTTCTAGGTGCTGAGATTGATGGTGAGTCTCAGGTAGACATGATTCTACAGTCGTTG	Contig1188	107	29	19	26	33	48.5981	-33.8	-31.5888	-0.65
	bpe-miR5368.ggs.ca	15	ACAGTCTCAGGTAGA	CAATGATGAAGCATTGTCTATCTATGATAGCCCTACTCAATACACTAGAGGTTCTAGGTGCTGAGATTGATGGTGAGTCTCAGGTAGACATGATTCTACAGTCGTTG	Contig1188	107	29	19	26	33	48.5981	-33.8	-31.5888	-0.65
	bpe-miR5368.ggs.GT	19	ACAGTCTCAGGTAGACAGT	CAATGATGAAGCATTGTCTATCTATGATAGCCCTACTCAATACACTAGAGGTTCTAGGTGCTGAGATTGATGGTGAGTCTCAGGTAGACATGATTCTACAGTCGTTG	Contig1188	107	29	19	26	33	48.5981	-33.8	-31.5888	-0.65
	bpe-miR5368.Gs	20	GGGACAGTCTCAGGTAGACA	CAATGATGAAGCATTGTCTATCTATGATAGCCCTACTCAATACACTAGAGGTTCTAGGTGCTGAGATTGATGGTGAGTCTCAGGTAGACATGATTCTACAGTCGTTG	Contig1188	107	29	19	26	33	48.5981	-33.8	-31.5888	-0.65
	bpe-miR5368.gs	18	GACAGTCTCAGGTAGACA	CAATGATGAAGCATTGTCTATCTATGATAGCCCTACTCAATACACTAGAGGTTCTAGGTGCTGAGATTGATGGTGAGTCTCAGGTAGACATGATTCTACAGTCGTTG	Contig1188	107	29	19	26	33	48.5981	-33.8	-31.5888	-0.65
	bpe-miR5368.gs.ca	16	GACAGTCTCAGGTAGA	CAATGATGAAGCATTGTCTATCTATGATAGCCCTACTCAATACACTAGAGGTTCTAGGTGCTGAGATTGATGGTGAGTCTCAGGTAGACATGATTCTACAGTCGTTG	Contig1188	107	29	19	26	33	48.5981	-33.8	-31.5888	-0.65
	bpe-miR5368.Gs.ca	18	GGGACAGTCTCAGGTAGA	CAATGATGAAGCATTGTCTATCTATGATAGCCCTACTCAATACACTAGAGGTTCTAGGTGCTGAGATTGATGGTGAGTCTCAGGTAGACATGATTCTACAGTCGTTG	Contig1188	107	29	19	26	33	48.5981	-33.8	-31.5888	-0.65
	bpe-miR5368.gs.G	19	GACAGTCTCAGGTAGACAG	CAATGATGAAGCATTGTCTATCTATGATAGCCCTACTCAATACACTAGAGGTTCTAGGTGCTGAGATTGATGGTGAGTCTCAGGTAGACATGATTCTACAGTCGTTG	Contig1188	107	29	19	26	33	48.5981	-33.8	-31.5888	-0.65
	bpe-miR5368.Gs.GT	22	GGGACAGTCTCAGGTAGACAGT	CAATGATGAAGCATTGTCTATCTATGATAGCCCTACTCAATACACTAGAGGTTCTAGGTGCTGAGATTGATGGTGAGTCTCAGGTAGACATGATTCTACAGTCGTTG	Contig1188	107	29	19	26	33	48.5981	-33.8	-31.5888	-0.65
	bpe-miR5368.gs.GT	20	GACAGTCTCAGGTAGACAGT	CAATGATGAAGCATTGTCTATCTATGATAGCCCTACTCAATACACTAGAGGTTCTAGGTGCTGAGATTGATGGTGAGTCTCAGGTAGACATGATTCTACAGTCGTTG	Contig1188	107	29	19	26	33	48.5981	-33.8	-31.5888	-0.65
	bpe-miR5368.Gs.GTT	23	GGGACAGTCTCAGGTAGACAGTT	CAATGATGAAGCATTGTCTATCTATGATAGCCCTACTCAATACACTAGAGGTTCTAGGTGCTGAGATTGATGGTGAGTCTCAGGTAGACATGATTCTACAGTCGTTG	Contig1188	107	29	19	26	33	48.5981	-33.8	-31.5888	-0.65
	bpe-miR5368.Gs.GTTT	24	GGGACAGTCTCAGGTAGACAGTTT	CAATGATGAAGCATTGTCTATCTATGATAGCCCTACTCAATACACTAGAGGTTCTAGGTGCTGAGATTGATGGTGAGTCTCAGGTAGACATGATTCTACAGTCGTTG	Contig1188	107	29	19	26	33	48.5981	-33.8	-31.5888	-0.65
bpe-miR482a	bpe-miR482a.T14G.T20G	22	TCTTCCCTACTCCGCCCATGCC	GAGGGAGGGACAATCGGAAACCTATGGCATGGGCGGAGTAGGGAAGACAGACAAACAAACTTGATTTCCTCTGCAACAACCTTTTTTGTCTTCCCCACTCACCCATGCCACAACCTTCCGAAAACCCTAACTC	Contig1354	133	40	39	27	27	49.6241	-56.3	-42.3308	-0.85303
	bpe-miR482a.T14G.T20G.c	21	TCTTCCCTACTCCGCCCATGC	GAGGGAGGGACAATCGGAAACCTATGGCATGGGCGGAGTAGGGAAGACAGACAAACAAACTTGATTTCCTCTGCAACAACCTTTTTTGTCTTCCCCACTCACCCATGCCACAACCTTCCGAAAACCCTAACTC	Contig1354	133	40	39	27	27	49.6241	-56.3	-42.3308	-0.85303
	bpe-miR482a.T14G.C21T.c	21	TCTTCCCTACTCCGCCCATTT	GAGGGAGGGACAATCGGAAACCTATGGCATGGGCGGAGTAGGGAAGACAGACAAACAAACTTGATTTCCTCTGCAACAACCTTTTTTGTCTTCCCCACTCACCCATGCCACAACCTTCCGAAAACCCTAACTC	Contig1354	133	40	39	27	27	49.6241	-56.3	-42.3308	-0.85303
	bpe-miR482a.C21T	22	TCTTCCCTACTCCTCCCATTTC	GAGGGAGGGACAATCGGAAACCTATGGCATGGGCGGAGTAGGGAAGACAGACAAACAAACTTGATTTCCTCTGCAACAACCTTTTTTGTCTTCCCCACTCACCCATGCCACAACCTTCCGAAAACCCTAACTC	Contig1354	133	40	39	27	27	49.6241	-56.3	-42.3308	-0.85303
	bpe-miR482a.T14G.T20G.T	23	TCTTCCCTACTCCGCCCATGCCT	GAGGGAGGGACAATCGGAAACCTATGGCATGGGCGGAGTAGGGAAGACAGACAAACAAACTTGATTTCCTCTGCAACAACCTTTTTTGTCTTCCCCACTCACCCATGCCACAACCTTCCGAAAACCCTAACTC	Contig1354	133	40	39	27	27	49.6241	-56.3	-42.3308	-0.85303
	bpe-miR482a.ts.T13G.T19G	21	CTTCCCTACTCCGCCCATGCC	GAGGGAGGGACAATCGGAAACCTATGGCATGGGCGGAGTAGGGAAGACAGACAAACAAACTTGATTTCCTCTGCAACAACCTTTTTTGTCTTCCCCACTCACCCATGCCACAACCTTCCGAAAACCCTAACTC	Contig1354	133	40	39	27	27	49.6241	-56.3	-42.3308	-0.85303
	bpe-miR482a.ts.T13G.T19G.T	22	CTTCCCTACTCCGCCCATGCCT	GAGGGAGGGACAATCGGAAACCTATGGCATGGGCGGAGTAGGGAAGACAGACAAACAAACTTGATTTCCTCTGCAACAACCTTTTTTGTCTTCCCCACTCACCCATGCCACAACCTTCCGAAAACCCTAACTC	Contig1354	133	40	39	27	27	49.6241	-56.3	-42.3308	-0.85303
bpe-miR395d-3p	bpe-miR395d-3p.c	20	CTGAAGTGTTTGGGGGAACT	GTCAGCTGTCTCCTAGAGTTCCCTTGAACACTTCACTAGCAAATGGCCAGTGCTATCCTACTGAAGTGTTTGGGGGAACTCTGGGTGCCATCTGAC	Contig101	96	20	25	24	27	54.1667	-54.6	-56.875	-1.05	CCAGAGTTCCCCCAAACACTTCAGTGGAGTAGAATTGCCCTCACTTAATTGATGGTTATTTACCGTTTCATAGAAGTGGTCGAGGGAACTCTAGG	Contig101	95	25	21	22	27	45.2632	-36.5	-38.4211	-0.848837	CCTGGAGTTCCCTCGACCACTTCTATGAAACATTGAAACTGTAAATAACCCTCAATGAAGTGAGGGCAATTCTACTCCACTGAAGTGTTTGGGGGAACTCTGG	Contig101	103	29	24	23	27	45.6311	-42.2	-40.9709	-0.897872												AAAGTTAGTTGTCCCCTAGAGTTCCCTTGACCACTTCTATGAAATGGTGAATAACCCTCAATTAAGTGAGGGCAATTTTATCCCACTGAAGTGTTTGGGGGAACTCTGGTTGTCAACTGACTTT	Contig101
	bpe-miR395d-3p.cs.c	19	TGAAGTGTTTGGGGGAACT	GTCAGCTGTCTCCTAGAGTTCCCTTGAACACTTCACTAGCAAATGGCCAGTGCTATCCTACTGAAGTGTTTGGGGGAACTCTGGGTGCCATCTGAC	Contig101	96	20	25	24	27	54.1667	-54.6	-56.875	-1.05	CCAGAGTTCCCCCAAACACTTCAGTGGAGTAGAATTGCCCTCACTTAATTGATGGTTATTTACCGTTTCATAGAAGTGGTCGAGGGAACTCTAGG	Contig101	95	25	21	22	27	45.2632	-36.5	-38.4211	-0.848837	CCTGGAGTTCCCTCGACCACTTCTATGAAACATTGAAACTGTAAATAACCCTCAATGAAGTGAGGGCAATTCTACTCCACTGAAGTGTTTGGGGGAACTCTGG	Contig101	103	29	24	23	27	45.6311	-42.2	-40.9709	-0.897872												AAAGTTAGTTGTCCCCTAGAGTTCCCTTGACCACTTCTATGAAATGGTGAATAACCCTCAATTAAGTGAGGGCAATTTTATCCCACTGAAGTGTTTGGGGGAACTCTGGTTGTCAACTGACTTT	Contig101
	bpe-miR395d-3p	21	CTGAAGTGTTTGGGGGAACTC	GTCAGCTGTCTCCTAGAGTTCCCTTGAACACTTCACTAGCAAATGGCCAGTGCTATCCTACTGAAGTGTTTGGGGGAACTCTGGGTGCCATCTGAC	Contig101	96	20	25	24	27	54.1667	-54.6	-56.875	-1.05	CCAGAGTTCCCCCAAACACTTCAGTGGAGTAGAATTGCCCTCACTTAATTGATGGTTATTTACCGTTTCATAGAAGTGGTCGAGGGAACTCTAGG	Contig101	95	25	21	22	27	45.2632	-36.5	-38.4211	-0.848837	CCTGGAGTTCCCTCGACCACTTCTATGAAACATTGAAACTGTAAATAACCCTCAATGAAGTGAGGGCAATTCTACTCCACTGAAGTGTTTGGGGGAACTCTGG	Contig101	103	29	24	23	27	45.6311	-42.2	-40.9709	-0.897872												AAAGTTAGTTGTCCCCTAGAGTTCCCTTGACCACTTCTATGAAATGGTGAATAACCCTCAATTAAGTGAGGGCAATTTTATCCCACTGAAGTGTTTGGGGGAACTCTGGTTGTCAACTGACTTT	Contig101
	bpe-miR395d-3p.tc	19	CTGAAGTGTTTGGGGGAAC	GTCAGCTGTCTCCTAGAGTTCCCTTGAACACTTCACTAGCAAATGGCCAGTGCTATCCTACTGAAGTGTTTGGGGGAACTCTGGGTGCCATCTGAC	Contig101	96	20	25	24	27	54.1667	-54.6	-56.875	-1.05	CCAGAGTTCCCCCAAACACTTCAGTGGAGTAGAATTGCCCTCACTTAATTGATGGTTATTTACCGTTTCATAGAAGTGGTCGAGGGAACTCTAGG	Contig101	95	25	21	22	27	45.2632	-36.5	-38.4211	-0.848837	CCTGGAGTTCCCTCGACCACTTCTATGAAACATTGAAACTGTAAATAACCCTCAATGAAGTGAGGGCAATTCTACTCCACTGAAGTGTTTGGGGGAACTCTGG	Contig101	103	29	24	23	27	45.6311	-42.2	-40.9709	-0.897872												AAAGTTAGTTGTCCCCTAGAGTTCCCTTGACCACTTCTATGAAATGGTGAATAACCCTCAATTAAGTGAGGGCAATTTTATCCCACTGAAGTGTTTGGGGGAACTCTGGTTGTCAACTGACTTT	Contig101
	bpe-miR395d-3p.G14T.c	20	CTGAAGTGTTTGGTGGAACT	GTCAGCTGTCTCCTAGAGTTCCCTTGAACACTTCACTAGCAAATGGCCAGTGCTATCCTACTGAAGTGTTTGGGGGAACTCTGGGTGCCATCTGAC	Contig101	96	20	25	24	27	54.1667	-54.6	-56.875	-1.05	CCAGAGTTCCCCCAAACACTTCAGTGGAGTAGAATTGCCCTCACTTAATTGATGGTTATTTACCGTTTCATAGAAGTGGTCGAGGGAACTCTAGG	Contig101	95	25	21	22	27	45.2632	-36.5	-38.4211	-0.848837	CCTGGAGTTCCCTCGACCACTTCTATGAAACATTGAAACTGTAAATAACCCTCAATGAAGTGAGGGCAATTCTACTCCACTGAAGTGTTTGGGGGAACTCTGG	Contig101	103	29	24	23	27	45.6311	-42.2	-40.9709	-0.897872												AAAGTTAGTTGTCCCCTAGAGTTCCCTTGACCACTTCTATGAAATGGTGAATAACCCTCAATTAAGTGAGGGCAATTTTATCCCACTGAAGTGTTTGGGGGAACTCTGGTTGTCAACTGACTTT	Contig101
	bpe-miR395d-3p.cts.c	18	GAAGTGTTTGGGGGAACT	GTCAGCTGTCTCCTAGAGTTCCCTTGAACACTTCACTAGCAAATGGCCAGTGCTATCCTACTGAAGTGTTTGGGGGAACTCTGGGTGCCATCTGAC	Contig101	96	20	25	24	27	54.1667	-54.6	-56.875	-1.05	CCAGAGTTCCCCCAAACACTTCAGTGGAGTAGAATTGCCCTCACTTAATTGATGGTTATTTACCGTTTCATAGAAGTGGTCGAGGGAACTCTAGG	Contig101	95	25	21	22	27	45.2632	-36.5	-38.4211	-0.848837	CCTGGAGTTCCCTCGACCACTTCTATGAAACATTGAAACTGTAAATAACCCTCAATGAAGTGAGGGCAATTCTACTCCACTGAAGTGTTTGGGGGAACTCTGG	Contig101	103	29	24	23	27	45.6311	-42.2	-40.9709	-0.897872												AAAGTTAGTTGTCCCCTAGAGTTCCCTTGACCACTTCTATGAAATGGTGAATAACCCTCAATTAAGTGAGGGCAATTTTATCCCACTGAAGTGTTTGGGGGAACTCTGGTTGTCAACTGACTTT	Contig101
	bpe-miR395d-3p.T9A.c	20	CTGAAGTGATTGGGGGAACT	GTCAGCTGTCTCCTAGAGTTCCCTTGAACACTTCACTAGCAAATGGCCAGTGCTATCCTACTGAAGTGTTTGGGGGAACTCTGGGTGCCATCTGAC	Contig101	96	20	25	24	27	54.1667	-54.6	-56.875	-1.05	CCAGAGTTCCCCCAAACACTTCAGTGGAGTAGAATTGCCCTCACTTAATTGATGGTTATTTACCGTTTCATAGAAGTGGTCGAGGGAACTCTAGG	Contig101	95	25	21	22	27	45.2632	-36.5	-38.4211	-0.848837	CCTGGAGTTCCCTCGACCACTTCTATGAAACATTGAAACTGTAAATAACCCTCAATGAAGTGAGGGCAATTCTACTCCACTGAAGTGTTTGGGGGAACTCTGG	Contig101	103	29	24	23	27	45.6311	-42.2	-40.9709	-0.897872												AAAGTTAGTTGTCCCCTAGAGTTCCCTTGACCACTTCTATGAAATGGTGAATAACCCTCAATTAAGTGAGGGCAATTTTATCCCACTGAAGTGTTTGGGGGAACTCTGGTTGTCAACTGACTTT	Contig101
	bpe-miR395d-3p.G	22	CTGAAGTGTTTGGGGGAACTCG	GTCAGCTGTCTCCTAGAGTTCCCTTGAACACTTCACTAGCAAATGGCCAGTGCTATCCTACTGAAGTGTTTGGGGGAACTCTGGGTGCCATCTGAC	Contig101	96	20	25	24	27	54.1667	-54.6	-56.875	-1.05	CCAGAGTTCCCCCAAACACTTCAGTGGAGTAGAATTGCCCTCACTTAATTGATGGTTATTTACCGTTTCATAGAAGTGGTCGAGGGAACTCTAGG	Contig101	95	25	21	22	27	45.2632	-36.5	-38.4211	-0.848837	CCTGGAGTTCCCTCGACCACTTCTATGAAACATTGAAACTGTAAATAACCCTCAATGAAGTGAGGGCAATTCTACTCCACTGAAGTGTTTGGGGGAACTCTGG	Contig101	103	29	24	23	27	45.6311	-42.2	-40.9709	-0.897872												AAAGTTAGTTGTCCCCTAGAGTTCCCTTGACCACTTCTATGAAATGGTGAATAACCCTCAATTAAGTGAGGGCAATTTTATCCCACTGAAGTGTTTGGGGGAACTCTGGTTGTCAACTGACTTT	Contig101
	bpe-miR395d-3p.T7C.T20C	21	CTGAAGCGTTTGGGGGAACCC	GTCAGCTGTCTCCTAGAGTTCCCTTGAACACTTCACTAGCAAATGGCCAGTGCTATCCTACTGAAGTGTTTGGGGGAACTCTGGGTGCCATCTGAC	Contig101	96	20	25	24	27	54.1667	-54.6	-56.875	-1.05	CCAGAGTTCCCCCAAACACTTCAGTGGAGTAGAATTGCCCTCACTTAATTGATGGTTATTTACCGTTTCATAGAAGTGGTCGAGGGAACTCTAGG	Contig101	95	25	21	22	27	45.2632	-36.5	-38.4211	-0.848837	CCTGGAGTTCCCTCGACCACTTCTATGAAACATTGAAACTGTAAATAACCCTCAATGAAGTGAGGGCAATTCTACTCCACTGAAGTGTTTGGGGGAACTCTGG	Contig101	103	29	24	23	27	45.6311	-42.2	-40.9709	-0.897872												AAAGTTAGTTGTCCCCTAGAGTTCCCTTGACCACTTCTATGAAATGGTGAATAACCCTCAATTAAGTGAGGGCAATTTTATCCCACTGAAGTGTTTGGGGGAACTCTGGTTGTCAACTGACTTT	Contig101
	bpe-miR395d-3p.cs.G13T.c	19	TGAAGTGTTTGGTGGAACT	GTCAGCTGTCTCCTAGAGTTCCCTTGAACACTTCACTAGCAAATGGCCAGTGCTATCCTACTGAAGTGTTTGGGGGAACTCTGGGTGCCATCTGAC	Contig101	96	20	25	24	27	54.1667	-54.6	-56.875	-1.05	CCAGAGTTCCCCCAAACACTTCAGTGGAGTAGAATTGCCCTCACTTAATTGATGGTTATTTACCGTTTCATAGAAGTGGTCGAGGGAACTCTAGG	Contig101	95	25	21	22	27	45.2632	-36.5	-38.4211	-0.848837	CCTGGAGTTCCCTCGACCACTTCTATGAAACATTGAAACTGTAAATAACCCTCAATGAAGTGAGGGCAATTCTACTCCACTGAAGTGTTTGGGGGAACTCTGG	Contig101	103	29	24	23	27	45.6311	-42.2	-40.9709	-0.897872												AAAGTTAGTTGTCCCCTAGAGTTCCCTTGACCACTTCTATGAAATGGTGAATAACCCTCAATTAAGTGAGGGCAATTTTATCCCACTGAAGTGTTTGGGGGAACTCTGGTTGTCAACTGACTTT	Contig101
bpe-miR167b-3p	bpe-miR167b-3p	23	GGTCATGCTCTGACAGCCTCACT	AGGAAAAAGTGAAGCTGCCAGCATGATCTAGCTTTGGTTAGAGATATCGATACTACTAACCCTTACTAGGTCATGCTCTGACAGCCTCACTCCTTCCT	Contig1471	98	27	25	19	27	53.0612	-42.1	-42.9592	-0.809615
	bpe-miR167b-3p.ggs.CC	23	TCATGCTCTGACAGCCTCACTCC	AGGAAAAAGTGAAGCTGCCAGCATGATCTAGCTTTGGTTAGAGATATCGATACTACTAACCCTTACTAGGTCATGCTCTGACAGCCTCACTCCTTCCT	Contig1471	84	27	25	19	27	61.9048	-42.1	-50.119	-0.809615
	bpe-miR167b-3p.As.t	23	AGGTCATGCTCTGACAGCCTCAC	AGGAAAAAGTGAAGCTGCCAGCATGATCTAGCTTTGGTTAGAGATATCGATACTACTAACCCTTACTAGGTCATGCTCTGACAGCCTCACTCCTTCCT	Contig1471	98	27	25	19	27	53.0612	-42.1	-42.9592	-0.809615
	bpe-miR167b-3p.As	24	AGGTCATGCTCTGACAGCCTCACT	AGGAAAAAGTGAAGCTGCCAGCATGATCTAGCTTTGGTTAGAGATATCGATACTACTAACCCTTACTAGGTCATGCTCTGACAGCCTCACTCCTTCCT	Contig1471	98	27	25	19	27	53.0612	-42.1	-42.9592	-0.809615
	bpe-miR167b-3p.ct	21	GGTCATGCTCTGACAGCCTCA	AGGAAAAAGTGAAGCTGCCAGCATGATCTAGCTTTGGTTAGAGATATCGATACTACTAACCCTTACTAGGTCATGCTCTGACAGCCTCACTCCTTCCT	Contig1471	98	27	25	19	27	53.0612	-42.1	-42.9592	-0.809615
	bpe-miR167b-3p.t	22	GGTCATGCTCTGACAGCCTCAC	AGGAAAAAGTGAAGCTGCCAGCATGATCTAGCTTTGGTTAGAGATATCGATACTACTAACCCTTACTAGGTCATGCTCTGACAGCCTCACTCCTTCCT	Contig1471	98	27	25	19	27	53.0612	-42.1	-42.9592	-0.809615
	bpe-miR167b-3p.GT	25	GGTCATGCTCTGACAGCCTCACTGT	AGGAAAAAGTGAAGCTGCCAGCATGATCTAGCTTTGGTTAGAGATATCGATACTACTAACCCTTACTAGGTCATGCTCTGACAGCCTCACTCCTTCCT	Contig1471	98	27	25	19	27	53.0612	-42.1	-42.9592	-0.809615
	bpe-miR167b-3p.T.G	25	GGTCATGCTCTGACAGCCTCACTTG	AGGAAAAAGTGAAGCTGCCAGCATGATCTAGCTTTGGTTAGAGATATCGATACTACTAACCCTTACTAGGTCATGCTCTGACAGCCTCACTCCTTCCT	Contig1471	98	27	25	19	27	53.0612	-42.1	-42.9592	-0.809615
	bpe-miR167b-3p.ggs	21	TCATGCTCTGACAGCCTCACT	AGGAAAAAGTGAAGCTGCCAGCATGATCTAGCTTTGGTTAGAGATATCGATACTACTAACCCTTACTAGGTCATGCTCTGACAGCCTCACTCCTTCCT	Contig1471	98	27	25	19	27	53.0612	-42.1	-42.9592	-0.809615
pde-miR166a	pde-miR166a.C19A.T	20	TCGGACCAGGCTTCATTCAT	GGAATGTTGTCTGGCTCGAGGTCATGGAGGATTTATATATATGTATATTTTTTCATATAATTGGAGACCCTAAATGATTCTCGGACCAGGCTTCATTCC	Contig2096	99	25	16	22	36	38.3838	-38	-38.3838	-1	AAAGTGAAGGTCTGGTGTGGGGAATGTTGTCTGGCTCGAGGCCACCAATAGACTGAATGATGACGTTCAGTTTGAGAGAGTTTTCTCGGACCAGGCTTCATTCCCCTCACTATCTTCTCTTT	Contig1055	122	26	26	32	38	47.541	-58.7	-48.1148	-1.01207												TTGAGGGGAATGAAGCCTGGTCCGAGGGCACTGACACTTATACAATCAATTTATGATCATCTGACAGATTTCGAAGAAAACGATGAGGTGACTCGGCCTTGGACCAGGCGACATTCCCCTCGA	Contig984	123	35	28	32	28	48.7805	-58.4	-47.4797	-0.973333	GTTGAGGGGAATGAAGCCTGGTCCGAAATCATTCAGATGAGCTTATACTTTGCATGAATGATCTCGAACCAGACGACATTCCCCTCAAC	Contig50
	pde-miR166a.Cs	20	CTCGGACCAGGCTTCATTCC	GGAATGTTGTCTGGCTCGAGGTCATGGAGGATTTATATATATGTATATTTTTTCATATAATTGGAGACCCTAAATGATTCTCGGACCAGGCTTCATTCC	Contig2096	99	25	16	22	36	38.3838	-38	-38.3838	-1	AAAGTGAAGGTCTGGTGTGGGGAATGTTGTCTGGCTCGAGGCCACCAATAGACTGAATGATGACGTTCAGTTTGAGAGAGTTTTCTCGGACCAGGCTTCATTCCCCTCACTATCTTCTCTTT	Contig1055	122	26	26	32	38	47.541	-58.7	-48.1148	-1.01207												TTGAGGGGAATGAAGCCTGGTCCGAGGGCACTGACACTTATACAATCAATTTATGATCATCTGACAGATTTCGAAGAAAACGATGAGGTGACTCGGCCTTGGACCAGGCGACATTCCCCTCGA	Contig984	123	35	28	32	28	48.7805	-58.4	-47.4797	-0.973333	GTTGAGGGGAATGAAGCCTGGTCCGAAATCATTCAGATGAGCTTATACTTTGCATGAATGATCTCGAACCAGACGACATTCCCCTCAAC	Contig50
	pde-miR166a.T	20	TCGGACCAGGCTTCATTCCT	GGAATGTTGTCTGGCTCGAGGTCATGGAGGATTTATATATATGTATATTTTTTCATATAATTGGAGACCCTAAATGATTCTCGGACCAGGCTTCATTCC	Contig2096	99	25	16	22	36	38.3838	-38	-38.3838	-1	AAAGTGAAGGTCTGGTGTGGGGAATGTTGTCTGGCTCGAGGCCACCAATAGACTGAATGATGACGTTCAGTTTGAGAGAGTTTTCTCGGACCAGGCTTCATTCCCCTCACTATCTTCTCTTT	Contig1055	122	26	26	32	38	47.541	-58.7	-48.1148	-1.01207												TTGAGGGGAATGAAGCCTGGTCCGAGGGCACTGACACTTATACAATCAATTTATGATCATCTGACAGATTTCGAAGAAAACGATGAGGTGACTCGGCCTTGGACCAGGCGACATTCCCCTCGA	Contig984	123	35	28	32	28	48.7805	-58.4	-47.4797	-0.973333	GTTGAGGGGAATGAAGCCTGGTCCGAAATCATTCAGATGAGCTTATACTTTGCATGAATGATCTCGAACCAGACGACATTCCCCTCAAC	Contig50
bpe-miR3627b	bpe-miR3627b.tgs.GC	22	TCGCAGGAGAGATGGCGCTAGC	GGTTGGGGGTTTCTTGTCGCAGGAGAGATGGCGCTAGCTGTGGGACGAATGGCAACCCCCTGCAAGCTCCATCCTCCTGCGACAAGATACCCGCAACC	Contig94	98	20	29	30	19	48.9796	-63.4	-64.6939	-1.32083	AAAGGGGTTGGAGGCATACTGTCGCAGGAGAGATGGCGCTAAATGTGGTTCATATATATATATATATATATATTTGGCAATTACTCACAGCAAGTGCCATCCTCCTGTGCCAGTATACCCTAGCCTCTTT	Contig94	99	25	16	22	36	38.3838	-38	-38.3838	-1	AAAGAGGTTGGGGGTTTGTTGTCGCAGGAGAGATGGTGTTAGCTGTGGGCCGGACGTATGGCAACCCTCGGCAAGTGCCATCCTCTGTGACAACATACCCCGCAACCTCTTT	Contig94	112	23	27	35	27	55.3571	-69.5	-62.0536	-1.12097
	bpe-miR3627b.C18T.C20T.a	21	TGTCGCAGGAGAGATGGTGTT	GGTTGGGGGTTTCTTGTCGCAGGAGAGATGGCGCTAGCTGTGGGACGAATGGCAACCCCCTGCAAGCTCCATCCTCCTGCGACAAGATACCCGCAACC	Contig94	98	20	29	30	19	48.9796	-63.4	-64.6939	-1.32083	AAAGGGGTTGGAGGCATACTGTCGCAGGAGAGATGGCGCTAAATGTGGTTCATATATATATATATATATATATTTGGCAATTACTCACAGCAAGTGCCATCCTCCTGTGCCAGTATACCCTAGCCTCTTT	Contig94	99	25	16	22	36	38.3838	-38	-38.3838	-1	AAAGAGGTTGGGGGTTTGTTGTCGCAGGAGAGATGGTGTTAGCTGTGGGCCGGACGTATGGCAACCCTCGGCAAGTGCCATCCTCTGTGACAACATACCCCGCAACCTCTTT	Contig94	112	23	27	35	27	55.3571	-69.5	-62.0536	-1.12097
	bpe-miR3627b.Cs.a	22	CTGTCGCAGGAGAGATGGCGCT	GGTTGGGGGTTTCTTGTCGCAGGAGAGATGGCGCTAGCTGTGGGACGAATGGCAACCCCCTGCAAGCTCCATCCTCCTGCGACAAGATACCCGCAACC	Contig94	98	20	29	30	19	48.9796	-63.4	-64.6939	-1.32083	AAAGGGGTTGGAGGCATACTGTCGCAGGAGAGATGGCGCTAAATGTGGTTCATATATATATATATATATATATTTGGCAATTACTCACAGCAAGTGCCATCCTCCTGTGCCAGTATACCCTAGCCTCTTT	Contig94	99	25	16	22	36	38.3838	-38	-38.3838	-1	AAAGAGGTTGGGGGTTTGTTGTCGCAGGAGAGATGGTGTTAGCTGTGGGCCGGACGTATGGCAACCCTCGGCAAGTGCCATCCTCTGTGACAACATACCCCGCAACCTCTTT	Contig94	112	23	27	35	27	55.3571	-69.5	-62.0536	-1.12097
	bpe-miR3627b.Ts.C18T.C20T.ta	21	TTGTCGCAGGAGAGATGGTGT	GGTTGGGGGTTTCTTGTCGCAGGAGAGATGGCGCTAGCTGTGGGACGAATGGCAACCCCCTGCAAGCTCCATCCTCCTGCGACAAGATACCCGCAACC	Contig94	98	20	29	30	19	48.9796	-63.4	-64.6939	-1.32083	AAAGGGGTTGGAGGCATACTGTCGCAGGAGAGATGGCGCTAAATGTGGTTCATATATATATATATATATATATTTGGCAATTACTCACAGCAAGTGCCATCCTCCTGTGCCAGTATACCCTAGCCTCTTT	Contig94	99	25	16	22	36	38.3838	-38	-38.3838	-1	AAAGAGGTTGGGGGTTTGTTGTCGCAGGAGAGATGGTGTTAGCTGTGGGCCGGACGTATGGCAACCCTCGGCAAGTGCCATCCTCTGTGACAACATACCCCGCAACCTCTTT	Contig94	112	23	27	35	27	55.3571	-69.5	-62.0536	-1.12097
	bpe-miR3627b.Ts.C18T.C20T.a	22	TTGTCGCAGGAGAGATGGTGTT	GGTTGGGGGTTTCTTGTCGCAGGAGAGATGGCGCTAGCTGTGGGACGAATGGCAACCCCCTGCAAGCTCCATCCTCCTGCGACAAGATACCCGCAACC	Contig94	98	20	29	30	19	48.9796	-63.4	-64.6939	-1.32083	AAAGGGGTTGGAGGCATACTGTCGCAGGAGAGATGGCGCTAAATGTGGTTCATATATATATATATATATATATTTGGCAATTACTCACAGCAAGTGCCATCCTCCTGTGCCAGTATACCCTAGCCTCTTT	Contig94	99	25	16	22	36	38.3838	-38	-38.3838	-1	AAAGAGGTTGGGGGTTTGTTGTCGCAGGAGAGATGGTGTTAGCTGTGGGCCGGACGTATGGCAACCCTCGGCAAGTGCCATCCTCTGTGACAACATACCCCGCAACCTCTTT	Contig94	112	23	27	35	27	55.3571	-69.5	-62.0536	-1.12097
	bpe-miR3627b.C18T.C20T	22	TGTCGCAGGAGAGATGGTGTTA	GGTTGGGGGTTTCTTGTCGCAGGAGAGATGGCGCTAGCTGTGGGACGAATGGCAACCCCCTGCAAGCTCCATCCTCCTGCGACAAGATACCCGCAACC	Contig94	98	20	29	30	19	48.9796	-63.4	-64.6939	-1.32083	AAAGGGGTTGGAGGCATACTGTCGCAGGAGAGATGGCGCTAAATGTGGTTCATATATATATATATATATATATTTGGCAATTACTCACAGCAAGTGCCATCCTCCTGTGCCAGTATACCCTAGCCTCTTT	Contig94	99	25	16	22	36	38.3838	-38	-38.3838	-1	AAAGAGGTTGGGGGTTTGTTGTCGCAGGAGAGATGGTGTTAGCTGTGGGCCGGACGTATGGCAACCCTCGGCAAGTGCCATCCTCTGTGACAACATACCCCGCAACCTCTTT	Contig94	112	23	27	35	27	55.3571	-69.5	-62.0536	-1.12097
	bpe-miR3627b.tgs.G	21	TCGCAGGAGAGATGGCGCTAG	GGTTGGGGGTTTCTTGTCGCAGGAGAGATGGCGCTAGCTGTGGGACGAATGGCAACCCCCTGCAAGCTCCATCCTCCTGCGACAAGATACCCGCAACC	Contig94	98	20	29	30	19	48.9796	-63.4	-64.6939	-1.32083	AAAGGGGTTGGAGGCATACTGTCGCAGGAGAGATGGCGCTAAATGTGGTTCATATATATATATATATATATATTTGGCAATTACTCACAGCAAGTGCCATCCTCCTGTGCCAGTATACCCTAGCCTCTTT	Contig94	99	25	16	22	36	38.3838	-38	-38.3838	-1	AAAGAGGTTGGGGGTTTGTTGTCGCAGGAGAGATGGTGTTAGCTGTGGGCCGGACGTATGGCAACCCTCGGCAAGTGCCATCCTCTGTGACAACATACCCCGCAACCTCTTT	Contig94	112	23	27	35	27	55.3571	-69.5	-62.0536	-1.12097
	bpe-miR3627b.tgs	20	TCGCAGGAGAGATGGCGCTA	GGTTGGGGGTTTCTTGTCGCAGGAGAGATGGCGCTAGCTGTGGGACGAATGGCAACCCCCTGCAAGCTCCATCCTCCTGCGACAAGATACCCGCAACC	Contig94	98	20	29	30	19	48.9796	-63.4	-64.6939	-1.32083	AAAGGGGTTGGAGGCATACTGTCGCAGGAGAGATGGCGCTAAATGTGGTTCATATATATATATATATATATATTTGGCAATTACTCACAGCAAGTGCCATCCTCCTGTGCCAGTATACCCTAGCCTCTTT	Contig94	99	25	16	22	36	38.3838	-38	-38.3838	-1	AAAGAGGTTGGGGGTTTGTTGTCGCAGGAGAGATGGTGTTAGCTGTGGGCCGGACGTATGGCAACCCTCGGCAAGTGCCATCCTCTGTGACAACATACCCCGCAACCTCTTT	Contig94	112	23	27	35	27	55.3571	-69.5	-62.0536	-1.12097
	bpe-miR3627b.tgs.a	19	TCGCAGGAGAGATGGCGCT	GGTTGGGGGTTTCTTGTCGCAGGAGAGATGGCGCTAGCTGTGGGACGAATGGCAACCCCCTGCAAGCTCCATCCTCCTGCGACAAGATACCCGCAACC	Contig94	98	20	29	30	19	48.9796	-63.4	-64.6939	-1.32083	AAAGGGGTTGGAGGCATACTGTCGCAGGAGAGATGGCGCTAAATGTGGTTCATATATATATATATATATATATTTGGCAATTACTCACAGCAAGTGCCATCCTCCTGTGCCAGTATACCCTAGCCTCTTT	Contig94	99	25	16	22	36	38.3838	-38	-38.3838	-1	AAAGAGGTTGGGGGTTTGTTGTCGCAGGAGAGATGGTGTTAGCTGTGGGCCGGACGTATGGCAACCCTCGGCAAGTGCCATCCTCTGTGACAACATACCCCGCAACCTCTTT	Contig94	112	23	27	35	27	55.3571	-69.5	-62.0536	-1.12097
bpe-miR171m.a	bpe-miR171m.a	20	TTGAGCCGCGTCAATATCTC	GAGGGATGGAGAAGGGTGTAAAAGGAGATATTGACGCGGCTCAATCAAAATCAAATGGCTAATTTCTCTTTTAACCATGTCTTCAAATTGAGCCACGTTAATACCTTCGTTTACAAAATATTTTAACACCCCTC	Contig386	134	44	26	25	39	48.5075	-47.1	-35.1493	-0.724615
	bpe-miR171m.ca	19	TTGAGCCGCGTCAATATCT	GAAGGGTGTAAAAGGAGATATTGACGCGGCTCAATCAAAATCAAATGGCTAATTTCTCTTTTAACCATGTCTTCAAATTGAGCCACGTTAATACCTTCGTTTACAAAATATTTT	Contig386	134	44	26	25	39	48.5075	-47.1	-35.1493	-0.724615
	bpe-miR171m.C18T.a	20	TTGAGCCGCGTCAATATTTC	GGAGATATTGACGCGGCTCAATCAAAATCAAATGGCTAATTTCTCTTTTAACCATGTCTTCAAATTGAGCCACGTTAATACCTTC	Contig386	134	44	26	25	39	48.5075	-47.1	-35.1493	-0.724615
	bpe-miR171m.A21T.T	22	TTGAGCCGCGTCAATATCTCTT	GGAGATATTGACGCGGCTCAATCAAAATCAAATGGCTAATTTCTCTTTTAACCATGTCTTCAAATTGAGCCACGTTAATACCTTC	Contig386	134	44	26	25	39	48.5075	-47.1	-35.1493	-0.724615
	bpe-miR171m.Gs.a	21	GTTGAGCCGCGTCAATATCTC	GGAGATATTGACGCGGCTCAATCAAAATCAAATGGCTAATTTCTCTTTTAACCATGTCTTCAAATTGAGCCACGTTAATACCTTC	Contig386	134	44	26	25	39	48.5075	-47.1	-35.1493	-0.724615
	bpe-miR171m.Ts.T2A.a	21	TTAGAGCCGCGTCAATATCTC	GGAGATATTGACGCGGCTCAATCAAAATCAAATGGCTAATTTCTCTTTTAACCATGTCTTCAAATTGAGCCACGTTAATACCTTC	Contig386	134	44	26	25	39	48.5075	-47.1	-35.1493	-0.724615
	bpe-miR171m.A21G	21	TTGAGCCGCGTCAATATCTCG	GGAGATATTGACGCGGCTCAATCAAAATCAAATGGCTAATTTCTCTTTTAACCATGTCTTCAAATTGAGCCACGTTAATACCTTC	Contig386	134	44	26	25	39	48.5075	-47.1	-35.1493	-0.724615
	bpe-miR171m.C20A.a	20	TTGAGCCGCGTCAATATCTA	GGAGATATTGACGCGGCTCAATCAAAATCAAATGGCTAATTTCTCTTTTAACCATGTCTTCAAATTGAGCCACGTTAATACCTTC	Contig386	134	44	26	25	39	48.5075	-47.1	-35.1493	-0.724615
	bpe-miR171m.C18T.ca	19	TTGAGCCGCGTCAATATTT	GGAGATATTGACGCGGCTCAATCAAAATCAAATGGCTAATTTCTCTTTTAACCATGTCTTCAAATTGAGCCACGTTAATACCTTC	Contig386	134	44	26	25	39	48.5075	-47.1	-35.1493	-0.724615
	bpe-miR171m.tts.ca	17	GAGCCGCGTCAATATCT	GGAGATATTGACGCGGCTCAATCAAAATCAAATGGCTAATTTCTCTTTTAACCATGTCTTCAAATTGAGCCACGTTAATACCTTC	Contig386	134	44	26	25	39	48.5075	-47.1	-35.1493	-0.724615
bpe-miR319	bpe-miR319.Cs	22	CTTGGACTGAAGGGAGCTCCCT	TCCAGTTTGCGACGGTGGATGAAGGCGGAGTGGGGGATCAGAATATTATGGATGGTATATAGCTCCCTTCAATCCAATTTGCCTGGA	Contig1322	87	21	15	27	24	44.8276	-27.5	-31.6092	-0.705128
	bpe-miR319	21	TTGGACTGAAGGGAGCTCCCT	TCCAGTTTGCGACGGTGGATGAAGGCGGAGTGGGGGATCAGAATATTATGGATGGTATATAGCTCCCTTCAATCCAATTTGCCTGGA	Contig1322	87	21	15	27	24	44.8276	-27.5	-31.6092	-0.705128
	bpe-miR319.Cs.ct	20	CTTGGACTGAAGGGAGCTCC	TCCAGTTTGCGACGGTGGATGAAGGCGGAGTGGGGGATCAGAATATTATGGATGGTATATAGCTCCCTTCAATCCAATTTGCCTGGA	Contig1322	87	21	15	27	24	44.8276	-27.5	-31.6092	-0.705128
	bpe-miR319.T21C.T	22	TTGGACTGAAGGGAGCTCCCCT	TCCAGTTTGCGACGGTGGATGAAGGCGGAGTGGGGGATCAGAATATTATGGATGGTATATAGCTCCCTTCAATCCAATTTGCCTGGA	Contig1322	87	21	15	27	24	44.8276	-27.5	-31.6092	-0.705128
	bpe-miR319.T.G	23	TTGGACTGAAGGGAGCTCCCTTG	TCCAGTTTGCGACGGTGGATGAAGGCGGAGTGGGGGATCAGAATATTATGGATGGTATATAGCTCCCTTCAATCCAATTTGCCTGGA	Contig1322	87	21	15	27	24	44.8276	-27.5	-31.6092	-0.705128
	bpe-miR319.ts.ct	18	TGGACTGAAGGGAGCTCC	TCCAGTTTGCGACGGTGGATGAAGGCGGAGTGGGGGATCAGAATATTATGGATGGTATATAGCTCCCTTCAATCCAATTTGCCTGGA	Contig1322	87	21	15	27	24	44.8276	-27.5	-31.6092	-0.705128
	bpe-miR319.Cs.T21C.CA	24	CTTGGACTGAAGGGAGCTCCCCCA	TCCAGTTTGCGACGGTGGATGAAGGCGGAGTGGGGGATCAGAATATTATGGATGGTATATAGCTCCCTTCAATCCAATTTGCCTGGA	Contig1322	87	21	15	27	24	44.8276	-27.5	-31.6092	-0.705128
	bpe-miR319.Cs.C20T.T	23	CTTGGACTGAAGGGAGCTCCTTT	TCCAGTTTGCGACGGTGGATGAAGGCGGAGTGGGGGATCAGAATATTATGGATGGTATATAGCTCCCTTCAATCCAATTTGCCTGGA	Contig1322	87	21	15	27	24	44.8276	-27.5	-31.6092	-0.705128
	bpe-miR319.Cs.C18T.C20A.TT	24	CTTGGACTGAAGGGAGCTTCATTT	TCCAGTTTGCGACGGTGGATGAAGGCGGAGTGGGGGATCAGAATATTATGGATGGTATATAGCTCCCTTCAATCCAATTTGCCTGGA	Contig1322	87	21	15	27	24	44.8276	-27.5	-31.6092	-0.705128
	bpe-miR319.Cs.T21C	22	CTTGGACTGAAGGGAGCTCCCC	TCCAGTTTGCGACGGTGGATGAAGGCGGAGTGGGGGATCAGAATATTATGGATGGTATATAGCTCCCTTCAATCCAATTTGCCTGGA	Contig1322	87	21	15	27	24	44.8276	-27.5	-31.6092	-0.705128
	bpe-miR319.T17G.C18T	21	TTGGACTGAAGGGAGCGTCCT	TCCAGTTTGCGACGGTGGATGAAGGCGGAGTGGGGGATCAGAATATTATGGATGGTATATAGCTCCCTTCAATCCAATTTGCCTGGA	Contig1322	87	21	15	27	24	44.8276	-27.5	-31.6092	-0.705128
	bpe-miR319.T21A.TT.G	24	TTGGACTGAAGGGAGCTCCCATTG	TCCAGTTTGCGACGGTGGATGAAGGCGGAGTGGGGGATCAGAATATTATGGATGGTATATAGCTCCCTTCAATCCAATTTGCCTGGA	Contig1322	87	21	15	27	24	44.8276	-27.5	-31.6092	-0.705128
	bpe-miR319.C6T.C19A.C	22	TTGGATTGAAGGGAGCTCACTC	TCCAGTTTGCGACGGTGGATGAAGGCGGAGTGGGGGATCAGAATATTATGGATGGTATATAGCTCCCTTCAATCCAATTTGCCTGGA	Contig1322	87	21	15	27	24	44.8276	-27.5	-31.6092	-0.705128
bpe-miR858-5p	bpe-miR858-5p.ts.tt	18	TTCGTTGTCTGTTCGACC	-
	bpe-miR858-5p.ts.C18T.tt	18	TTCGTTGTCTGTTCGACT	-
	bpe-miR858-5p.ts.GG	22	TTCGTTGTCTGTTCGACCTTGG	-
	bpe-miR858-5p.ts.T.G	22	TTCGTTGTCTGTTCGACCTTTG	-
	bpe-miR858-5p.tts.tt	17	TCGTTGTCTGTTCGACC	-
	bpe-miR858-5p.Gs.T3G.t	21	GTTGCGTTGTCTGTTCGACCT	-
	bpe-miR858-5p.T3G.G	22	TTGCGTTGTCTGTTCGACCTTG	-
	bpe-miR858-5p.T3C.C4G.G	22	TTCGGTTGTCTGTTCGACCTTG	-
	bpe-miR858-5p.T1G.tt	19	GTTCGTTGTCTGTTCGACC	-
	bpe-miR858-5p.G	22	TTTCGTTGTCTGTTCGACCTTG	-
	bpe-miR858-5p.ts.C17A.tt	18	TTCGTTGTCTGTTCGAAC	-
	bpe-miR858-5p.ts.T2C.tt	18	TCCGTTGTCTGTTCGACC	-
bpe-miR156g	bpe-miR156g.ag	18	ACAGAAGATAGAGAGCAC	AGTTTTAAAGTAGAGGAGGCACTGGTGATGTTGTTGACAGAAGATAGAGAGCACAGATGATGAAATGCATGGAACTGCTGCATCTCACTCCTTTGTGCTCTCTAGCTCCTGTCATCACCCTCAGCCCCTCACTTCAACT	Contig789	80	22	19	18	21	50	-38.5	-48.125	-0.9625	GGGGCTGAAGGTGATGACAGAAGCATAGAGAGCACAAAGGAGTGAGATGCAGGAGTTTGTTGCATATCATCATCTGTGCTCTCTATCTTCTGTCAACACATCACCAGTGCT	Contig374	111	31	22	30	28	46.8468	-53	-47.7477	-1.01923	TGTGATATTGGCACGGCTCAATCAGATCAAAGGACCCAACCATTGAGAGCTTTGATTTGATTGAGCCATGCCAACATCATA	Contig566	81	25	18	17	21	43.2099	-42.2	-52.0988	-1.20571
	bpe-miR156g.acs.ag	16	AGAAGATAGAGAGCAC	AGTTTTAAAGTAGAGGAGGCACTGGTGATGTTGTTGACAGAAGATAGAGAGCACAGATGATGAAATGCATGGAACTGCTGCATCTCACTCCTTTGTGCTCTCTAGCTCCTGTCATCACCCTCAGCCCCTCACTTCAACT	Contig789	80	22	19	18	21	50	-38.5	-48.125	-0.9625	GGGGCTGAAGGTGATGACAGAAGCATAGAGAGCACAAAGGAGTGAGATGCAGGAGTTTGTTGCATATCATCATCTGTGCTCTCTATCTTCTGTCAACACATCACCAGTGCT	Contig374	111	31	22	30	28	46.8468	-53	-47.7477	-1.01923	TGTGATATTGGCACGGCTCAATCAGATCAAAGGACCCAACCATTGAGAGCTTTGATTTGATTGAGCCATGCCAACATCATA	Contig566	81	25	18	17	21	43.2099	-42.2	-52.0988	-1.20571
	bpe-miR156g.Gs	21	GACAGAAGATAGAGAGCACAG	AGTTTTAAAGTAGAGGAGGCACTGGTGATGTTGTTGACAGAAGATAGAGAGCACAGATGATGAAATGCATGGAACTGCTGCATCTCACTCCTTTGTGCTCTCTAGCTCCTGTCATCACCCTCAGCCCCTCACTTCAACT	Contig789	80	22	19	18	21	50	-38.5	-48.125	-0.9625	GGGGCTGAAGGTGATGACAGAAGCATAGAGAGCACAAAGGAGTGAGATGCAGGAGTTTGTTGCATATCATCATCTGTGCTCTCTATCTTCTGTCAACACATCACCAGTGCT	Contig374	111	31	22	30	28	46.8468	-53	-47.7477	-1.01923	TGTGATATTGGCACGGCTCAATCAGATCAAAGGACCCAACCATTGAGAGCTTTGATTTGATTGAGCCATGCCAACATCATA	Contig566	81	25	18	17	21	43.2099	-42.2	-52.0988	-1.20571
	bpe-miR156g.as.ag	17	CAGAAGATAGAGAGCAC	AGTTTTAAAGTAGAGGAGGCACTGGTGATGTTGTTGACAGAAGATAGAGAGCACAGATGATGAAATGCATGGAACTGCTGCATCTCACTCCTTTGTGCTCTCTAGCTCCTGTCATCACCCTCAGCCCCTCACTTCAACT	Contig789	80	22	19	18	21	50	-38.5	-48.125	-0.9625	GGGGCTGAAGGTGATGACAGAAGCATAGAGAGCACAAAGGAGTGAGATGCAGGAGTTTGTTGCATATCATCATCTGTGCTCTCTATCTTCTGTCAACACATCACCAGTGCT	Contig374	111	31	22	30	28	46.8468	-53	-47.7477	-1.01923	TGTGATATTGGCACGGCTCAATCAGATCAAAGGACCCAACCATTGAGAGCTTTGATTTGATTGAGCCATGCCAACATCATA	Contig566	81	25	18	17	21	43.2099	-42.2	-52.0988	-1.20571
	bpe-miR156g.acs.g	17	AGAAGATAGAGAGCACA	AGTTTTAAAGTAGAGGAGGCACTGGTGATGTTGTTGACAGAAGATAGAGAGCACAGATGATGAAATGCATGGAACTGCTGCATCTCACTCCTTTGTGCTCTCTAGCTCCTGTCATCACCCTCAGCCCCTCACTTCAACT	Contig789	80	22	19	18	21	50	-38.5	-48.125	-0.9625	GGGGCTGAAGGTGATGACAGAAGCATAGAGAGCACAAAGGAGTGAGATGCAGGAGTTTGTTGCATATCATCATCTGTGCTCTCTATCTTCTGTCAACACATCACCAGTGCT	Contig374	111	31	22	30	28	46.8468	-53	-47.7477	-1.01923	TGTGATATTGGCACGGCTCAATCAGATCAAAGGACCCAACCATTGAGAGCTTTGATTTGATTGAGCCATGCCAACATCATA	Contig566	81	25	18	17	21	43.2099	-42.2	-52.0988	-1.20571
	bpe-miR156g.TGs.A19T.G20C.G.T	24	TGACAGAAGATAGAGAGCACTCGT	AGTTTTAAAGTAGAGGAGGCACTGGTGATGTTGTTGACAGAAGATAGAGAGCACAGATGATGAAATGCATGGAACTGCTGCATCTCACTCCTTTGTGCTCTCTAGCTCCTGTCATCACCCTCAGCCCCTCACTTCAACT	Contig789	80	22	19	18	21	50	-38.5	-48.125	-0.9625	GGGGCTGAAGGTGATGACAGAAGCATAGAGAGCACAAAGGAGTGAGATGCAGGAGTTTGTTGCATATCATCATCTGTGCTCTCTATCTTCTGTCAACACATCACCAGTGCT	Contig374	111	31	22	30	28	46.8468	-53	-47.7477	-1.01923	TGTGATATTGGCACGGCTCAATCAGATCAAAGGACCCAACCATTGAGAGCTTTGATTTGATTGAGCCATGCCAACATCATA	Contig566	81	25	18	17	21	43.2099	-42.2	-52.0988	-1.20571
	bpe-miR156g.TGs.G20C.T	23	TGACAGAAGATAGAGAGCACACT	AGTTTTAAAGTAGAGGAGGCACTGGTGATGTTGTTGACAGAAGATAGAGAGCACAGATGATGAAATGCATGGAACTGCTGCATCTCACTCCTTTGTGCTCTCTAGCTCCTGTCATCACCCTCAGCCCCTCACTTCAACT	Contig789	80	22	19	18	21	50	-38.5	-48.125	-0.9625	GGGGCTGAAGGTGATGACAGAAGCATAGAGAGCACAAAGGAGTGAGATGCAGGAGTTTGTTGCATATCATCATCTGTGCTCTCTATCTTCTGTCAACACATCACCAGTGCT	Contig374	111	31	22	30	28	46.8468	-53	-47.7477	-1.01923	TGTGATATTGGCACGGCTCAATCAGATCAAAGGACCCAACCATTGAGAGCTTTGATTTGATTGAGCCATGCCAACATCATA	Contig566	81	25	18	17	21	43.2099	-42.2	-52.0988	-1.20571
	bpe-miR156g.TGs.A19C.G20C	22	TGACAGAAGATAGAGAGCACCC	AGTTTTAAAGTAGAGGAGGCACTGGTGATGTTGTTGACAGAAGATAGAGAGCACAGATGATGAAATGCATGGAACTGCTGCATCTCACTCCTTTGTGCTCTCTAGCTCCTGTCATCACCCTCAGCCCCTCACTTCAACT	Contig789	80	22	19	18	21	50	-38.5	-48.125	-0.9625	GGGGCTGAAGGTGATGACAGAAGCATAGAGAGCACAAAGGAGTGAGATGCAGGAGTTTGTTGCATATCATCATCTGTGCTCTCTATCTTCTGTCAACACATCACCAGTGCT	Contig374	111	31	22	30	28	46.8468	-53	-47.7477	-1.01923	TGTGATATTGGCACGGCTCAATCAGATCAAAGGACCCAACCATTGAGAGCTTTGATTTGATTGAGCCATGCCAACATCATA	Contig566	81	25	18	17	21	43.2099	-42.2	-52.0988	-1.20571
	bpe-miR156g.Gs.A19C.T	22	GACAGAAGATAGAGAGCACCGT	AGTTTTAAAGTAGAGGAGGCACTGGTGATGTTGTTGACAGAAGATAGAGAGCACAGATGATGAAATGCATGGAACTGCTGCATCTCACTCCTTTGTGCTCTCTAGCTCCTGTCATCACCCTCAGCCCCTCACTTCAACT	Contig789	80	22	19	18	21	50	-38.5	-48.125	-0.9625	GGGGCTGAAGGTGATGACAGAAGCATAGAGAGCACAAAGGAGTGAGATGCAGGAGTTTGTTGCATATCATCATCTGTGCTCTCTATCTTCTGTCAACACATCACCAGTGCT	Contig374	111	31	22	30	28	46.8468	-53	-47.7477	-1.01923	TGTGATATTGGCACGGCTCAATCAGATCAAAGGACCCAACCATTGAGAGCTTTGATTTGATTGAGCCATGCCAACATCATA	Contig566	81	25	18	17	21	43.2099	-42.2	-52.0988	-1.20571
	bpe-miR156g.Gs.g	20	GACAGAAGATAGAGAGCACA	AGTTTTAAAGTAGAGGAGGCACTGGTGATGTTGTTGACAGAAGATAGAGAGCACAGATGATGAAATGCATGGAACTGCTGCATCTCACTCCTTTGTGCTCTCTAGCTCCTGTCATCACCCTCAGCCCCTCACTTCAACT	Contig789	80	22	19	18	21	50	-38.5	-48.125	-0.9625	GGGGCTGAAGGTGATGACAGAAGCATAGAGAGCACAAAGGAGTGAGATGCAGGAGTTTGTTGCATATCATCATCTGTGCTCTCTATCTTCTGTCAACACATCACCAGTGCT	Contig374	111	31	22	30	28	46.8468	-53	-47.7477	-1.01923	TGTGATATTGGCACGGCTCAATCAGATCAAAGGACCCAACCATTGAGAGCTTTGATTTGATTGAGCCATGCCAACATCATA	Contig566	81	25	18	17	21	43.2099	-42.2	-52.0988	-1.20571
	bpe-miR156g.A19C.g	19	ACAGAAGATAGAGAGCACC	AGTTTTAAAGTAGAGGAGGCACTGGTGATGTTGTTGACAGAAGATAGAGAGCACAGATGATGAAATGCATGGAACTGCTGCATCTCACTCCTTTGTGCTCTCTAGCTCCTGTCATCACCCTCAGCCCCTCACTTCAACT	Contig789	80	22	19	18	21	50	-38.5	-48.125	-0.9625	GGGGCTGAAGGTGATGACAGAAGCATAGAGAGCACAAAGGAGTGAGATGCAGGAGTTTGTTGCATATCATCATCTGTGCTCTCTATCTTCTGTCAACACATCACCAGTGCT	Contig374	111	31	22	30	28	46.8468	-53	-47.7477	-1.01923	TGTGATATTGGCACGGCTCAATCAGATCAAAGGACCCAACCATTGAGAGCTTTGATTTGATTGAGCCATGCCAACATCATA	Contig566	81	25	18	17	21	43.2099	-42.2	-52.0988	-1.20571
	bpe-miR156g.as.g	18	CAGAAGATAGAGAGCACA	AGTTTTAAAGTAGAGGAGGCACTGGTGATGTTGTTGACAGAAGATAGAGAGCACAGATGATGAAATGCATGGAACTGCTGCATCTCACTCCTTTGTGCTCTCTAGCTCCTGTCATCACCCTCAGCCCCTCACTTCAACT	Contig789	80	22	19	18	21	50	-38.5	-48.125	-0.9625	GGGGCTGAAGGTGATGACAGAAGCATAGAGAGCACAAAGGAGTGAGATGCAGGAGTTTGTTGCATATCATCATCTGTGCTCTCTATCTTCTGTCAACACATCACCAGTGCT	Contig374	111	31	22	30	28	46.8468	-53	-47.7477	-1.01923	TGTGATATTGGCACGGCTCAATCAGATCAAAGGACCCAACCATTGAGAGCTTTGATTTGATTGAGCCATGCCAACATCATA	Contig566	81	25	18	17	21	43.2099	-42.2	-52.0988	-1.20571
	bpe-miR156g.as.A9T.ag	17	CAGAAGATTGAGAGCAC	AGTTTTAAAGTAGAGGAGGCACTGGTGATGTTGTTGACAGAAGATAGAGAGCACAGATGATGAAATGCATGGAACTGCTGCATCTCACTCCTTTGTGCTCTCTAGCTCCTGTCATCACCCTCAGCCCCTCACTTCAACT	Contig789	80	22	19	18	21	50	-38.5	-48.125	-0.9625	GGGGCTGAAGGTGATGACAGAAGCATAGAGAGCACAAAGGAGTGAGATGCAGGAGTTTGTTGCATATCATCATCTGTGCTCTCTATCTTCTGTCAACACATCACCAGTGCT	Contig374	111	31	22	30	28	46.8468	-53	-47.7477	-1.01923	TGTGATATTGGCACGGCTCAATCAGATCAAAGGACCCAACCATTGAGAGCTTTGATTTGATTGAGCCATGCCAACATCATA	Contig566	81	25	18	17	21	43.2099	-42.2	-52.0988	-1.20571
	bpe-miR156g.acs	18	AGAAGATAGAGAGCACAG	AGTTTTAAAGTAGAGGAGGCACTGGTGATGTTGTTGACAGAAGATAGAGAGCACAGATGATGAAATGCATGGAACTGCTGCATCTCACTCCTTTGTGCTCTCTAGCTCCTGTCATCACCCTCAGCCCCTCACTTCAACT	Contig789	80	22	19	18	21	50	-38.5	-48.125	-0.9625	GGGGCTGAAGGTGATGACAGAAGCATAGAGAGCACAAAGGAGTGAGATGCAGGAGTTTGTTGCATATCATCATCTGTGCTCTCTATCTTCTGTCAACACATCACCAGTGCT	Contig374	111	31	22	30	28	46.8468	-53	-47.7477	-1.01923	TGTGATATTGGCACGGCTCAATCAGATCAAAGGACCCAACCATTGAGAGCTTTGATTTGATTGAGCCATGCCAACATCATA	Contig566	81	25	18	17	21	43.2099	-42.2	-52.0988	-1.20571
bpe-miR157d	bpe-miR157d-5p	20	TGACAGAAGATAGAGAGCAC	AGTTTTAAAGTAGAGGAGGCACTGGTGATGTTGTTGACAGAAGATAGAGAGCACAGATGATGAAATGCATGGAACTGCTGCATCTCACTCCTTTGTGCTCTCTAGCTCCTGTCATCACCCTCAGCCCCTCACTTCAACT	Contig789	80	22	19	18	21	50	-38.5	-48.125	-0.9625	GGGGCTGAAGGTGATGACAGAAGCATAGAGAGCACAAAGGAGTGAGATGCAGGAGTTTGTTGCATATCATCATCTGTGCTCTCTATCTTCTGTCAACACATCACCAGTGCT	Contig374	111	31	22	30	28	46.8468	-53	-47.7477	-1.01923	TTCCCTGGGACATAGAAATTGACAGAAGAGAGTGAGCACACAGAGGCCATATGGTATAAAGTCTATACTAATGCTTTTGCGTGCTCACTTCTCTTTCTGTCAGATTCCAGTCCCGGAGGAG	Contig511	81	25	18	17	21	43.2099	-42.2	-52.0988	-1.20571
	bpe-miR157d-5p.ts.ac	17	GACAGAAGATAGAGAGC	AGTTTTAAAGTAGAGGAGGCACTGGTGATGTTGTTGACAGAAGATAGAGAGCACAGATGATGAAATGCATGGAACTGCTGCATCTCACTCCTTTGTGCTCTCTAGCTCCTGTCATCACCCTCAGCCCCTCACTTCAACT	Contig789	80	22	19	18	21	50	-38.5	-48.125	-0.9625	GGGGCTGAAGGTGATGACAGAAGCATAGAGAGCACAAAGGAGTGAGATGCAGGAGTTTGTTGCATATCATCATCTGTGCTCTCTATCTTCTGTCAACACATCACCAGTGCT	Contig374	111	31	22	30	28	46.8468	-53	-47.7477	-1.01923	TTCCCTGGGACATAGAAATTGACAGAAGAGAGTGAGCACACAGAGGCCATATGGTATAAAGTCTATACTAATGCTTTTGCGTGCTCACTTCTCTTTCTGTCAGATTCCAGTCCCGGAGGAG	Contig511	81	25	18	17	21	43.2099	-42.2	-52.0988	-1.20571
	bpe-miR157d-5p.tgs	18	ACAGAAGATAGAGAGCAC	AGTTTTAAAGTAGAGGAGGCACTGGTGATGTTGTTGACAGAAGATAGAGAGCACAGATGATGAAATGCATGGAACTGCTGCATCTCACTCCTTTGTGCTCTCTAGCTCCTGTCATCACCCTCAGCCCCTCACTTCAACT	Contig789	80	22	19	18	21	50	-38.5	-48.125	-0.9625	GGGGCTGAAGGTGATGACAGAAGCATAGAGAGCACAAAGGAGTGAGATGCAGGAGTTTGTTGCATATCATCATCTGTGCTCTCTATCTTCTGTCAACACATCACCAGTGCT	Contig374	111	31	22	30	28	46.8468	-53	-47.7477	-1.01923	TTCCCTGGGACATAGAAATTGACAGAAGAGAGTGAGCACACAGAGGCCATATGGTATAAAGTCTATACTAATGCTTTTGCGTGCTCACTTCTCTTTCTGTCAGATTCCAGTCCCGGAGGAG	Contig511	81	25	18	17	21	43.2099	-42.2	-52.0988	-1.20571
	bpe-miR157d-5p.T	21	TGACAGAAGATAGAGAGCACT	AGTTTTAAAGTAGAGGAGGCACTGGTGATGTTGTTGACAGAAGATAGAGAGCACAGATGATGAAATGCATGGAACTGCTGCATCTCACTCCTTTGTGCTCTCTAGCTCCTGTCATCACCCTCAGCCCCTCACTTCAACT	Contig789	80	22	19	18	21	50	-38.5	-48.125	-0.9625	GGGGCTGAAGGTGATGACAGAAGCATAGAGAGCACAAAGGAGTGAGATGCAGGAGTTTGTTGCATATCATCATCTGTGCTCTCTATCTTCTGTCAACACATCACCAGTGCT	Contig374	111	31	22	30	28	46.8468	-53	-47.7477	-1.01923	TTCCCTGGGACATAGAAATTGACAGAAGAGAGTGAGCACACAGAGGCCATATGGTATAAAGTCTATACTAATGCTTTTGCGTGCTCACTTCTCTTTCTGTCAGATTCCAGTCCCGGAGGAG	Contig511	81	25	18	17	21	43.2099	-42.2	-52.0988	-1.20571
	bpe-miR157d-5p.tgs.ac	16	ACAGAAGATAGAGAGC	AGTTTTAAAGTAGAGGAGGCACTGGTGATGTTGTTGACAGAAGATAGAGAGCACAGATGATGAAATGCATGGAACTGCTGCATCTCACTCCTTTGTGCTCTCTAGCTCCTGTCATCACCCTCAGCCCCTCACTTCAACT	Contig789	80	22	19	18	21	50	-38.5	-48.125	-0.9625	GGGGCTGAAGGTGATGACAGAAGCATAGAGAGCACAAAGGAGTGAGATGCAGGAGTTTGTTGCATATCATCATCTGTGCTCTCTATCTTCTGTCAACACATCACCAGTGCT	Contig374	111	31	22	30	28	46.8468	-53	-47.7477	-1.01923	TTCCCTGGGACATAGAAATTGACAGAAGAGAGTGAGCACACAGAGGCCATATGGTATAAAGTCTATACTAATGCTTTTGCGTGCTCACTTCTCTTTCTGTCAGATTCCAGTCCCGGAGGAG	Contig511	81	25	18	17	21	43.2099	-42.2	-52.0988	-1.20571
	bpe-miR157d-5p.ac	18	TGACAGAAGATAGAGAGC	AGTTTTAAAGTAGAGGAGGCACTGGTGATGTTGTTGACAGAAGATAGAGAGCACAGATGATGAAATGCATGGAACTGCTGCATCTCACTCCTTTGTGCTCTCTAGCTCCTGTCATCACCCTCAGCCCCTCACTTCAACT	Contig789	80	22	19	18	21	50	-38.5	-48.125	-0.9625	GGGGCTGAAGGTGATGACAGAAGCATAGAGAGCACAAAGGAGTGAGATGCAGGAGTTTGTTGCATATCATCATCTGTGCTCTCTATCTTCTGTCAACACATCACCAGTGCT	Contig374	111	31	22	30	28	46.8468	-53	-47.7477	-1.01923	TTCCCTGGGACATAGAAATTGACAGAAGAGAGTGAGCACACAGAGGCCATATGGTATAAAGTCTATACTAATGCTTTTGCGTGCTCACTTCTCTTTCTGTCAGATTCCAGTCCCGGAGGAG	Contig511	81	25	18	17	21	43.2099	-42.2	-52.0988	-1.20571
	bpe-miR157d-5p.Ts.TG	23	TTGACAGAAGATAGAGAGCACTG	AGTTTTAAAGTAGAGGAGGCACTGGTGATGTTGTTGACAGAAGATAGAGAGCACAGATGATGAAATGCATGGAACTGCTGCATCTCACTCCTTTGTGCTCTCTAGCTCCTGTCATCACCCTCAGCCCCTCACTTCAACT	Contig789	80	22	19	18	21	50	-38.5	-48.125	-0.9625	GGGGCTGAAGGTGATGACAGAAGCATAGAGAGCACAAAGGAGTGAGATGCAGGAGTTTGTTGCATATCATCATCTGTGCTCTCTATCTTCTGTCAACACATCACCAGTGCT	Contig374	111	31	22	30	28	46.8468	-53	-47.7477	-1.01923	TTCCCTGGGACATAGAAATTGACAGAAGAGAGTGAGCACACAGAGGCCATATGGTATAAAGTCTATACTAATGCTTTTGCGTGCTCACTTCTCTTTCTGTCAGATTCCAGTCCCGGAGGAG	Contig511	81	25	18	17	21	43.2099	-42.2	-52.0988	-1.20571
	bpe-miR157d-5p.G2T	20	TTACAGAAGATAGAGAGCAC	AGTTTTAAAGTAGAGGAGGCACTGGTGATGTTGTTGACAGAAGATAGAGAGCACAGATGATGAAATGCATGGAACTGCTGCATCTCACTCCTTTGTGCTCTCTAGCTCCTGTCATCACCCTCAGCCCCTCACTTCAACT	Contig789	80	22	19	18	21	50	-38.5	-48.125	-0.9625	GGGGCTGAAGGTGATGACAGAAGCATAGAGAGCACAAAGGAGTGAGATGCAGGAGTTTGTTGCATATCATCATCTGTGCTCTCTATCTTCTGTCAACACATCACCAGTGCT	Contig374	111	31	22	30	28	46.8468	-53	-47.7477	-1.01923	TTCCCTGGGACATAGAAATTGACAGAAGAGAGTGAGCACACAGAGGCCATATGGTATAAAGTCTATACTAATGCTTTTGCGTGCTCACTTCTCTTTCTGTCAGATTCCAGTCCCGGAGGAG	Contig511	81	25	18	17	21	43.2099	-42.2	-52.0988	-1.20571
	bpe-miR157d-5p.c	19	TGACAGAAGATAGAGAGCA	AGTTTTAAAGTAGAGGAGGCACTGGTGATGTTGTTGACAGAAGATAGAGAGCACAGATGATGAAATGCATGGAACTGCTGCATCTCACTCCTTTGTGCTCTCTAGCTCCTGTCATCACCCTCAGCCCCTCACTTCAACT	Contig789	80	22	19	18	21	50	-38.5	-48.125	-0.9625	GGGGCTGAAGGTGATGACAGAAGCATAGAGAGCACAAAGGAGTGAGATGCAGGAGTTTGTTGCATATCATCATCTGTGCTCTCTATCTTCTGTCAACACATCACCAGTGCT	Contig374	111	31	22	30	28	46.8468	-53	-47.7477	-1.01923	TTCCCTGGGACATAGAAATTGACAGAAGAGAGTGAGCACACAGAGGCCATATGGTATAAAGTCTATACTAATGCTTTTGCGTGCTCACTTCTCTTTCTGTCAGATTCCAGTCCCGGAGGAG	Contig511	81	25	18	17	21	43.2099	-42.2	-52.0988	-1.20571
	bpe-miR157d-5p.A	21	TGACAGAAGATAGAGAGCACA	AGTTTTAAAGTAGAGGAGGCACTGGTGATGTTGTTGACAGAAGATAGAGAGCACAGATGATGAAATGCATGGAACTGCTGCATCTCACTCCTTTGTGCTCTCTAGCTCCTGTCATCACCCTCAGCCCCTCACTTCAACT	Contig789	80	22	19	18	21	50	-38.5	-48.125	-0.9625	GGGGCTGAAGGTGATGACAGAAGCATAGAGAGCACAAAGGAGTGAGATGCAGGAGTTTGTTGCATATCATCATCTGTGCTCTCTATCTTCTGTCAACACATCACCAGTGCT	Contig374	111	31	22	30	28	46.8468	-53	-47.7477	-1.01923	TTCCCTGGGACATAGAAATTGACAGAAGAGAGTGAGCACACAGAGGCCATATGGTATAAAGTCTATACTAATGCTTTTGCGTGCTCACTTCTCTTTCTGTCAGATTCCAGTCCCGGAGGAG	Contig511	81	25	18	17	21	43.2099	-42.2	-52.0988	-1.20571
	bpe-miR157d-5p.ts.c	18	GACAGAAGATAGAGAGCA	AGTTTTAAAGTAGAGGAGGCACTGGTGATGTTGTTGACAGAAGATAGAGAGCACAGATGATGAAATGCATGGAACTGCTGCATCTCACTCCTTTGTGCTCTCTAGCTCCTGTCATCACCCTCAGCCCCTCACTTCAACT	Contig789	80	22	19	18	21	50	-38.5	-48.125	-0.9625	GGGGCTGAAGGTGATGACAGAAGCATAGAGAGCACAAAGGAGTGAGATGCAGGAGTTTGTTGCATATCATCATCTGTGCTCTCTATCTTCTGTCAACACATCACCAGTGCT	Contig374	111	31	22	30	28	46.8468	-53	-47.7477	-1.01923	TTCCCTGGGACATAGAAATTGACAGAAGAGAGTGAGCACACAGAGGCCATATGGTATAAAGTCTATACTAATGCTTTTGCGTGCTCACTTCTCTTTCTGTCAGATTCCAGTCCCGGAGGAG	Contig511	81	25	18	17	21	43.2099	-42.2	-52.0988	-1.20571
	bpe-miR157d-5p.ts	19	GACAGAAGATAGAGAGCAC	AGTTTTAAAGTAGAGGAGGCACTGGTGATGTTGTTGACAGAAGATAGAGAGCACAGATGATGAAATGCATGGAACTGCTGCATCTCACTCCTTTGTGCTCTCTAGCTCCTGTCATCACCCTCAGCCCCTCACTTCAACT	Contig789	80	22	19	18	21	50	-38.5	-48.125	-0.9625	GGGGCTGAAGGTGATGACAGAAGCATAGAGAGCACAAAGGAGTGAGATGCAGGAGTTTGTTGCATATCATCATCTGTGCTCTCTATCTTCTGTCAACACATCACCAGTGCT	Contig374	111	31	22	30	28	46.8468	-53	-47.7477	-1.01923	TTCCCTGGGACATAGAAATTGACAGAAGAGAGTGAGCACACAGAGGCCATATGGTATAAAGTCTATACTAATGCTTTTGCGTGCTCACTTCTCTTTCTGTCAGATTCCAGTCCCGGAGGAG	Contig511	81	25	18	17	21	43.2099	-42.2	-52.0988	-1.20571
	bpe-miR157d-5p.tgs.c	17	ACAGAAGATAGAGAGCA	AGTTTTAAAGTAGAGGAGGCACTGGTGATGTTGTTGACAGAAGATAGAGAGCACAGATGATGAAATGCATGGAACTGCTGCATCTCACTCCTTTGTGCTCTCTAGCTCCTGTCATCACCCTCAGCCCCTCACTTCAACT	Contig789	80	22	19	18	21	50	-38.5	-48.125	-0.9625	GGGGCTGAAGGTGATGACAGAAGCATAGAGAGCACAAAGGAGTGAGATGCAGGAGTTTGTTGCATATCATCATCTGTGCTCTCTATCTTCTGTCAACACATCACCAGTGCT	Contig374	111	31	22	30	28	46.8468	-53	-47.7477	-1.01923	TTCCCTGGGACATAGAAATTGACAGAAGAGAGTGAGCACACAGAGGCCATATGGTATAAAGTCTATACTAATGCTTTTGCGTGCTCACTTCTCTTTCTGTCAGATTCCAGTCCCGGAGGAG	Contig511	81	25	18	17	21	43.2099	-42.2	-52.0988	-1.20571
	bpe-miR157d-5p.A10T	20	TGACAGAAGTTAGAGAGCAC	AGTTTTAAAGTAGAGGAGGCACTGGTGATGTTGTTGACAGAAGATAGAGAGCACAGATGATGAAATGCATGGAACTGCTGCATCTCACTCCTTTGTGCTCTCTAGCTCCTGTCATCACCCTCAGCCCCTCACTTCAACT	Contig789	80	22	19	18	21	50	-38.5	-48.125	-0.9625	GGGGCTGAAGGTGATGACAGAAGCATAGAGAGCACAAAGGAGTGAGATGCAGGAGTTTGTTGCATATCATCATCTGTGCTCTCTATCTTCTGTCAACACATCACCAGTGCT	Contig374	111	31	22	30	28	46.8468	-53	-47.7477	-1.01923	TTCCCTGGGACATAGAAATTGACAGAAGAGAGTGAGCACACAGAGGCCATATGGTATAAAGTCTATACTAATGCTTTTGCGTGCTCACTTCTCTTTCTGTCAGATTCCAGTCCCGGAGGAG	Contig511	81	25	18	17	21	43.2099	-42.2	-52.0988	-1.20571
	bpe-miR157d-5p.TG	22	TGACAGAAGATAGAGAGCACTG	AGTTTTAAAGTAGAGGAGGCACTGGTGATGTTGTTGACAGAAGATAGAGAGCACAGATGATGAAATGCATGGAACTGCTGCATCTCACTCCTTTGTGCTCTCTAGCTCCTGTCATCACCCTCAGCCCCTCACTTCAACT	Contig789	80	22	19	18	21	50	-38.5	-48.125	-0.9625	GGGGCTGAAGGTGATGACAGAAGCATAGAGAGCACAAAGGAGTGAGATGCAGGAGTTTGTTGCATATCATCATCTGTGCTCTCTATCTTCTGTCAACACATCACCAGTGCT	Contig374	111	31	22	30	28	46.8468	-53	-47.7477	-1.01923	TTCCCTGGGACATAGAAATTGACAGAAGAGAGTGAGCACACAGAGGCCATATGGTATAAAGTCTATACTAATGCTTTTGCGTGCTCACTTCTCTTTCTGTCAGATTCCAGTCCCGGAGGAG	Contig511	81	25	18	17	21	43.2099	-42.2	-52.0988	-1.20571
	bpe-miR157d-5p.C.T	22	TGACAGAAGATAGAGAGCACCT	AGTTTTAAAGTAGAGGAGGCACTGGTGATGTTGTTGACAGAAGATAGAGAGCACAGATGATGAAATGCATGGAACTGCTGCATCTCACTCCTTTGTGCTCTCTAGCTCCTGTCATCACCCTCAGCCCCTCACTTCAACT	Contig789	80	22	19	18	21	50	-38.5	-48.125	-0.9625	GGGGCTGAAGGTGATGACAGAAGCATAGAGAGCACAAAGGAGTGAGATGCAGGAGTTTGTTGCATATCATCATCTGTGCTCTCTATCTTCTGTCAACACATCACCAGTGCT	Contig374	111	31	22	30	28	46.8468	-53	-47.7477	-1.01923	TTCCCTGGGACATAGAAATTGACAGAAGAGAGTGAGCACACAGAGGCCATATGGTATAAAGTCTATACTAATGCTTTTGCGTGCTCACTTCTCTTTCTGTCAGATTCCAGTCCCGGAGGAG	Contig511	81	25	18	17	21	43.2099	-42.2	-52.0988	-1.20571
	bpe-miR157d-5p.G13T	20	TGACAGAAGATATAGAGCAC	AGTTTTAAAGTAGAGGAGGCACTGGTGATGTTGTTGACAGAAGATAGAGAGCACAGATGATGAAATGCATGGAACTGCTGCATCTCACTCCTTTGTGCTCTCTAGCTCCTGTCATCACCCTCAGCCCCTCACTTCAACT	Contig789	80	22	19	18	21	50	-38.5	-48.125	-0.9625	GGGGCTGAAGGTGATGACAGAAGCATAGAGAGCACAAAGGAGTGAGATGCAGGAGTTTGTTGCATATCATCATCTGTGCTCTCTATCTTCTGTCAACACATCACCAGTGCT	Contig374	111	31	22	30	28	46.8468	-53	-47.7477	-1.01923	TTCCCTGGGACATAGAAATTGACAGAAGAGAGTGAGCACACAGAGGCCATATGGTATAAAGTCTATACTAATGCTTTTGCGTGCTCACTTCTCTTTCTGTCAGATTCCAGTCCCGGAGGAG	Contig511	81	25	18	17	21	43.2099	-42.2	-52.0988	-1.20571
	bpe-miR157d-5p.C	21	TGACAGAAGATAGAGAGCACC	AGTTTTAAAGTAGAGGAGGCACTGGTGATGTTGTTGACAGAAGATAGAGAGCACAGATGATGAAATGCATGGAACTGCTGCATCTCACTCCTTTGTGCTCTCTAGCTCCTGTCATCACCCTCAGCCCCTCACTTCAACT	Contig789	80	22	19	18	21	50	-38.5	-48.125	-0.9625	GGGGCTGAAGGTGATGACAGAAGCATAGAGAGCACAAAGGAGTGAGATGCAGGAGTTTGTTGCATATCATCATCTGTGCTCTCTATCTTCTGTCAACACATCACCAGTGCT	Contig374	111	31	22	30	28	46.8468	-53	-47.7477	-1.01923	TTCCCTGGGACATAGAAATTGACAGAAGAGAGTGAGCACACAGAGGCCATATGGTATAAAGTCTATACTAATGCTTTTGCGTGCTCACTTCTCTTTCTGTCAGATTCCAGTCCCGGAGGAG	Contig511	81	25	18	17	21	43.2099	-42.2	-52.0988	-1.20571
	bpe-miR157d-5p.T1G.ac	18	GGACAGAAGATAGAGAGC	AGTTTTAAAGTAGAGGAGGCACTGGTGATGTTGTTGACAGAAGATAGAGAGCACAGATGATGAAATGCATGGAACTGCTGCATCTCACTCCTTTGTGCTCTCTAGCTCCTGTCATCACCCTCAGCCCCTCACTTCAACT	Contig789	80	22	19	18	21	50	-38.5	-48.125	-0.9625	GGGGCTGAAGGTGATGACAGAAGCATAGAGAGCACAAAGGAGTGAGATGCAGGAGTTTGTTGCATATCATCATCTGTGCTCTCTATCTTCTGTCAACACATCACCAGTGCT	Contig374	111	31	22	30	28	46.8468	-53	-47.7477	-1.01923	TTCCCTGGGACATAGAAATTGACAGAAGAGAGTGAGCACACAGAGGCCATATGGTATAAAGTCTATACTAATGCTTTTGCGTGCTCACTTCTCTTTCTGTCAGATTCCAGTCCCGGAGGAG	Contig511	81	25	18	17	21	43.2099	-42.2	-52.0988	-1.20571
	bpe-miR157d-5p.ts.A18T.c	18	GACAGAAGATAGAGAGCT	AGTTTTAAAGTAGAGGAGGCACTGGTGATGTTGTTGACAGAAGATAGAGAGCACAGATGATGAAATGCATGGAACTGCTGCATCTCACTCCTTTGTGCTCTCTAGCTCCTGTCATCACCCTCAGCCCCTCACTTCAACT	Contig789	80	22	19	18	21	50	-38.5	-48.125	-0.9625	GGGGCTGAAGGTGATGACAGAAGCATAGAGAGCACAAAGGAGTGAGATGCAGGAGTTTGTTGCATATCATCATCTGTGCTCTCTATCTTCTGTCAACACATCACCAGTGCT	Contig374	111	31	22	30	28	46.8468	-53	-47.7477	-1.01923	TTCCCTGGGACATAGAAATTGACAGAAGAGAGTGAGCACACAGAGGCCATATGGTATAAAGTCTATACTAATGCTTTTGCGTGCTCACTTCTCTTTCTGTCAGATTCCAGTCCCGGAGGAG	Contig511	81	25	18	17	21	43.2099	-42.2	-52.0988	-1.20571
	bpe-miR157d-5p.ts.T	20	GACAGAAGATAGAGAGCACT	AGTTTTAAAGTAGAGGAGGCACTGGTGATGTTGTTGACAGAAGATAGAGAGCACAGATGATGAAATGCATGGAACTGCTGCATCTCACTCCTTTGTGCTCTCTAGCTCCTGTCATCACCCTCAGCCCCTCACTTCAACT	Contig789	80	22	19	18	21	50	-38.5	-48.125	-0.9625	GGGGCTGAAGGTGATGACAGAAGCATAGAGAGCACAAAGGAGTGAGATGCAGGAGTTTGTTGCATATCATCATCTGTGCTCTCTATCTTCTGTCAACACATCACCAGTGCT	Contig374	111	31	22	30	28	46.8468	-53	-47.7477	-1.01923	TTCCCTGGGACATAGAAATTGACAGAAGAGAGTGAGCACACAGAGGCCATATGGTATAAAGTCTATACTAATGCTTTTGCGTGCTCACTTCTCTTTCTGTCAGATTCCAGTCCCGGAGGAG	Contig511	81	25	18	17	21	43.2099	-42.2	-52.0988	-1.20571
	bpe-miR157d-5p.ts.A18G.c	18	GACAGAAGATAGAGAGCG	AGTTTTAAAGTAGAGGAGGCACTGGTGATGTTGTTGACAGAAGATAGAGAGCACAGATGATGAAATGCATGGAACTGCTGCATCTCACTCCTTTGTGCTCTCTAGCTCCTGTCATCACCCTCAGCCCCTCACTTCAACT	Contig789	80	22	19	18	21	50	-38.5	-48.125	-0.9625	GGGGCTGAAGGTGATGACAGAAGCATAGAGAGCACAAAGGAGTGAGATGCAGGAGTTTGTTGCATATCATCATCTGTGCTCTCTATCTTCTGTCAACACATCACCAGTGCT	Contig374	111	31	22	30	28	46.8468	-53	-47.7477	-1.01923	TTCCCTGGGACATAGAAATTGACAGAAGAGAGTGAGCACACAGAGGCCATATGGTATAAAGTCTATACTAATGCTTTTGCGTGCTCACTTCTCTTTCTGTCAGATTCCAGTCCCGGAGGAG	Contig511	81	25	18	17	21	43.2099	-42.2	-52.0988	-1.20571
	bpe-miR157d-5p.Gs.C	22	GTGACAGAAGATAGAGAGCACC	AGTTTTAAAGTAGAGGAGGCACTGGTGATGTTGTTGACAGAAGATAGAGAGCACAGATGATGAAATGCATGGAACTGCTGCATCTCACTCCTTTGTGCTCTCTAGCTCCTGTCATCACCCTCAGCCCCTCACTTCAACT	Contig789	80	22	19	18	21	50	-38.5	-48.125	-0.9625	GGGGCTGAAGGTGATGACAGAAGCATAGAGAGCACAAAGGAGTGAGATGCAGGAGTTTGTTGCATATCATCATCTGTGCTCTCTATCTTCTGTCAACACATCACCAGTGCT	Contig374	111	31	22	30	28	46.8468	-53	-47.7477	-1.01923	TTCCCTGGGACATAGAAATTGACAGAAGAGAGTGAGCACACAGAGGCCATATGGTATAAAGTCTATACTAATGCTTTTGCGTGCTCACTTCTCTTTCTGTCAGATTCCAGTCCCGGAGGAG	Contig511	81	25	18	17	21	43.2099	-42.2	-52.0988	-1.20571
	bpe-miR157d-5p.G2T.ac	18	TTACAGAAGATAGAGAGC	AGTTTTAAAGTAGAGGAGGCACTGGTGATGTTGTTGACAGAAGATAGAGAGCACAGATGATGAAATGCATGGAACTGCTGCATCTCACTCCTTTGTGCTCTCTAGCTCCTGTCATCACCCTCAGCCCCTCACTTCAACT	Contig789	80	22	19	18	21	50	-38.5	-48.125	-0.9625	GGGGCTGAAGGTGATGACAGAAGCATAGAGAGCACAAAGGAGTGAGATGCAGGAGTTTGTTGCATATCATCATCTGTGCTCTCTATCTTCTGTCAACACATCACCAGTGCT	Contig374	111	31	22	30	28	46.8468	-53	-47.7477	-1.01923	TTCCCTGGGACATAGAAATTGACAGAAGAGAGTGAGCACACAGAGGCCATATGGTATAAAGTCTATACTAATGCTTTTGCGTGCTCACTTCTCTTTCTGTCAGATTCCAGTCCCGGAGGAG	Contig511	81	25	18	17	21	43.2099	-42.2	-52.0988	-1.20571
	bpe-miR157d-5p.A14T	20	TGACAGAAGATAGTGAGCAC	AGTTTTAAAGTAGAGGAGGCACTGGTGATGTTGTTGACAGAAGATAGAGAGCACAGATGATGAAATGCATGGAACTGCTGCATCTCACTCCTTTGTGCTCTCTAGCTCCTGTCATCACCCTCAGCCCCTCACTTCAACT	Contig789	80	22	19	18	21	50	-38.5	-48.125	-0.9625	GGGGCTGAAGGTGATGACAGAAGCATAGAGAGCACAAAGGAGTGAGATGCAGGAGTTTGTTGCATATCATCATCTGTGCTCTCTATCTTCTGTCAACACATCACCAGTGCT	Contig374	111	31	22	30	28	46.8468	-53	-47.7477	-1.01923	TTCCCTGGGACATAGAAATTGACAGAAGAGAGTGAGCACACAGAGGCCATATGGTATAAAGTCTATACTAATGCTTTTGCGTGCTCACTTCTCTTTCTGTCAGATTCCAGTCCCGGAGGAG	Contig511	81	25	18	17	21	43.2099	-42.2	-52.0988	-1.20571
	bpe-miR157d-5p.ts.A4T.ac	17	GACTGAAGATAGAGAGC	AGTTTTAAAGTAGAGGAGGCACTGGTGATGTTGTTGACAGAAGATAGAGAGCACAGATGATGAAATGCATGGAACTGCTGCATCTCACTCCTTTGTGCTCTCTAGCTCCTGTCATCACCCTCAGCCCCTCACTTCAACT	Contig789	80	22	19	18	21	50	-38.5	-48.125	-0.9625	GGGGCTGAAGGTGATGACAGAAGCATAGAGAGCACAAAGGAGTGAGATGCAGGAGTTTGTTGCATATCATCATCTGTGCTCTCTATCTTCTGTCAACACATCACCAGTGCT	Contig374	111	31	22	30	28	46.8468	-53	-47.7477	-1.01923	TTCCCTGGGACATAGAAATTGACAGAAGAGAGTGAGCACACAGAGGCCATATGGTATAAAGTCTATACTAATGCTTTTGCGTGCTCACTTCTCTTTCTGTCAGATTCCAGTCCCGGAGGAG	Contig511	81	25	18	17	21	43.2099	-42.2	-52.0988	-1.20571
	bpe-miR157d-5p.ts.C3T.ac	17	GATAGAAGATAGAGAGC	AGTTTTAAAGTAGAGGAGGCACTGGTGATGTTGTTGACAGAAGATAGAGAGCACAGATGATGAAATGCATGGAACTGCTGCATCTCACTCCTTTGTGCTCTCTAGCTCCTGTCATCACCCTCAGCCCCTCACTTCAACT	Contig789	80	22	19	18	21	50	-38.5	-48.125	-0.9625	GGGGCTGAAGGTGATGACAGAAGCATAGAGAGCACAAAGGAGTGAGATGCAGGAGTTTGTTGCATATCATCATCTGTGCTCTCTATCTTCTGTCAACACATCACCAGTGCT	Contig374	111	31	22	30	28	46.8468	-53	-47.7477	-1.01923	TTCCCTGGGACATAGAAATTGACAGAAGAGAGTGAGCACACAGAGGCCATATGGTATAAAGTCTATACTAATGCTTTTGCGTGCTCACTTCTCTTTCTGTCAGATTCCAGTCCCGGAGGAG	Contig511	81	25	18	17	21	43.2099	-42.2	-52.0988	-1.20571
bpe-miR169d-5p	bpe-miR169d-5p.C5T.C6T.G	22	TGAGTTAAGGATGACTTGCCGG	GAGAGTGGATTTGAGTCAAGGATGACTTGCCGGCTGGCAATATGCCATCGCTCCAGGGTATTGCGGCTGGCCGGCGGGCATCCTTGACTTACCTTCGCTCTC	Contig2351	102	17	27	32	26	51.9608	-64.7	-63.4314	-1.22075	GAGAGTGGATTTGAGTCAAGGATGAGATGCCGGCCTTTAATATGCCATCCCTCCTGGGTATTGCGGCTGGCCGGCGGGCATCCTTGACTTACATTCGCTCTC	Contig2351	102	18	26	30	28	54.902	-60.8	-59.6078	-1.08571
	bpe-miR169d-5p.C5T.C15G.G	22	TGAGTCAAGGATGAGTTGCCGG	GAGAGTGGATTTGAGTCAAGGATGACTTGCCGGCTGGCAATATGCCATCGCTCCAGGGTATTGCGGCTGGCCGGCGGGCATCCTTGACTTACCTTCGCTCTC	Contig2351	102	17	27	32	26	51.9608	-64.7	-63.4314	-1.22075	GAGAGTGGATTTGAGTCAAGGATGAGATGCCGGCCTTTAATATGCCATCCCTCCTGGGTATTGCGGCTGGCCGGCGGGCATCCTTGACTTACATTCGCTCTC	Contig2351	102	18	26	30	28	54.902	-60.8	-59.6078	-1.08571
	bpe-miR169d-5p.G10A.AG	23	TGAGCCAAGAATGACTTGCCGAG	GAGAGTGGATTTGAGTCAAGGATGACTTGCCGGCTGGCAATATGCCATCGCTCCAGGGTATTGCGGCTGGCCGGCGGGCATCCTTGACTTACCTTCGCTCTC	Contig2351	102	17	27	32	26	51.9608	-64.7	-63.4314	-1.22075	GAGAGTGGATTTGAGTCAAGGATGAGATGCCGGCCTTTAATATGCCATCCCTCCTGGGTATTGCGGCTGGCCGGCGGGCATCCTTGACTTACATTCGCTCTC	Contig2351	102	18	26	30	28	54.902	-60.8	-59.6078	-1.08571
	bpe-miR169d-5p.G10A.AC	23	TGAGCCAAGAATGACTTGCCGAC	GAGAGTGGATTTGAGTCAAGGATGACTTGCCGGCTGGCAATATGCCATCGCTCCAGGGTATTGCGGCTGGCCGGCGGGCATCCTTGACTTACCTTCGCTCTC	Contig2351	102	17	27	32	26	51.9608	-64.7	-63.4314	-1.22075	GAGAGTGGATTTGAGTCAAGGATGAGATGCCGGCCTTTAATATGCCATCCCTCCTGGGTATTGCGGCTGGCCGGCGGGCATCCTTGACTTACATTCGCTCTC	Contig2351	102	18	26	30	28	54.902	-60.8	-59.6078	-1.08571
bpe-miR408d	bpe-miR408d	20	TGCACTGCCTCTTCCCTGGC	CAGGGAACGGGCAGAGCATGGATGGAGCTATCGACAGTATAGGAACCTGTCGTGGCTCTACTCATGCACTGCCTCTTCCCTG	Contig129	82	18	22	24	18	48.7805	-52.9	-64.5122	-1.3225
	bpe-miR408d.TG	22	TGCACTGCCTCTTCCCTGGCTG	CAGGGAACGGGCAGAGCATGGATGGAGCTATCGACAGTATAGGAACCTGTCGTGGCTCTACTCATGCACTGCCTCTTCCCTG	Contig129	82	18	22	24	18	48.7805	-52.9	-64.5122	-1.3225
	bpe-miR408d.TC	22	TGCACTGCCTCTTCCCTGGCTC	CAGGGAACGGGCAGAGCATGGATGGAGCTATCGACAGTATAGGAACCTGTCGTGGCTCTACTCATGCACTGCCTCTTCCCTG	Contig129	82	18	22	24	18	48.7805	-52.9	-64.5122	-1.3225
	bpe-miR408d.As.C	22	ATGCACTGCCTCTTCCCTGGCC	CAGGGAACGGGCAGAGCATGGATGGAGCTATCGACAGTATAGGAACCTGTCGTGGCTCTACTCATGCACTGCCTCTTCCCTG	Contig129	82	18	22	24	18	48.7805	-52.9	-64.5122	-1.3225
	bpe-miR408d.gc	18	TGCACTGCCTCTTCCCTG	CAGGGAACGGGCAGAGCATGGATGGAGCTATCGACAGTATAGGAACCTGTCGTGGCTCTACTCATGCACTGCCTCTTCCCTG	Contig129	82	18	22	24	18	48.7805	-52.9	-64.5122	-1.3225
	bpe-miR408d.TA	22	TGCACTGCCTCTTCCCTGGCTA	CAGGGAACGGGCAGAGCATGGATGGAGCTATCGACAGTATAGGAACCTGTCGTGGCTCTACTCATGCACTGCCTCTTCCCTG	Contig129	82	18	22	24	18	48.7805	-52.9	-64.5122	-1.3225
	bpe-miR408d.CAs.T	23	CATGCACTGCCTCTTCCCTGGCT	CAGGGAACGGGCAGAGCATGGATGGAGCTATCGACAGTATAGGAACCTGTCGTGGCTCTACTCATGCACTGCCTCTTCCCTG	Contig129	82	18	22	24	18	48.7805	-52.9	-64.5122	-1.3225
	bpe-miR408d.AGs	22	AGTGCACTGCCTCTTCCCTGGC	CAGGGAACGGGCAGAGCATGGATGGAGCTATCGACAGTATAGGAACCTGTCGTGGCTCTACTCATGCACTGCCTCTTCCCTG	Contig129	82	18	22	24	18	48.7805	-52.9	-64.5122	-1.3225
	bpe-miR408d.Gs.T	22	GTGCACTGCCTCTTCCCTGGCT	CAGGGAACGGGCAGAGCATGGATGGAGCTATCGACAGTATAGGAACCTGTCGTGGCTCTACTCATGCACTGCCTCTTCCCTG	Contig129	82	18	22	24	18	48.7805	-52.9	-64.5122	-1.3225
	bpe-miR408d.As.A	22	ATGCACTGCCTCTTCCCTGGCA	CAGGGAACGGGCAGAGCATGGATGGAGCTATCGACAGTATAGGAACCTGTCGTGGCTCTACTCATGCACTGCCTCTTCCCTG	Contig129	82	18	22	24	18	48.7805	-52.9	-64.5122	-1.3225
	bpe-miR408d.As.AC	23	ATGCACTGCCTCTTCCCTGGCAC	CAGGGAACGGGCAGAGCATGGATGGAGCTATCGACAGTATAGGAACCTGTCGTGGCTCTACTCATGCACTGCCTCTTCCCTG	Contig129	82	18	22	24	18	48.7805	-52.9	-64.5122	-1.3225
	bpe-miR408d.As.C.A	23	ATGCACTGCCTCTTCCCTGGCCA	CAGGGAACGGGCAGAGCATGGATGGAGCTATCGACAGTATAGGAACCTGTCGTGGCTCTACTCATGCACTGCCTCTTCCCTG	Contig129	82	18	22	24	18	48.7805	-52.9	-64.5122	-1.3225
	bpe-miR408d.C20T	20	TGCACTGCCTCTTCCCTGGT	CAGGGAACGGGCAGAGCATGGATGGAGCTATCGACAGTATAGGAACCTGTCGTGGCTCTACTCATGCACTGCCTCTTCCCTG	Contig129	82	18	22	24	18	48.7805	-52.9	-64.5122	-1.3225
	bpe-miR408d.C20T.AC	22	TGCACTGCCTCTTCCCTGGTAC	CAGGGAACGGGCAGAGCATGGATGGAGCTATCGACAGTATAGGAACCTGTCGTGGCTCTACTCATGCACTGCCTCTTCCCTG	Contig129	82	18	22	24	18	48.7805	-52.9	-64.5122	-1.3225
	bpe-miR408d.c	19	TGCACTGCCTCTTCCCTGG	CAGGGAACGGGCAGAGCATGGATGGAGCTATCGACAGTATAGGAACCTGTCGTGGCTCTACTCATGCACTGCCTCTTCCCTG	Contig129	82	18	22	24	18	48.7805	-52.9	-64.5122	-1.3225
	bpe-miR408d.As.C20T.T	22	ATGCACTGCCTCTTCCCTGGTT	CAGGGAACGGGCAGAGCATGGATGGAGCTATCGACAGTATAGGAACCTGTCGTGGCTCTACTCATGCACTGCCTCTTCCCTG	Contig129	82	18	22	24	18	48.7805	-52.9	-64.5122	-1.3225
	bpe-miR408d.Ts.T1A.T	22	TAGCACTGCCTCTTCCCTGGCT	CAGGGAACGGGCAGAGCATGGATGGAGCTATCGACAGTATAGGAACCTGTCGTGGCTCTACTCATGCACTGCCTCTTCCCTG	Contig129	82	18	22	24	18	48.7805	-52.9	-64.5122	-1.3225
	bpe-miR408d.Ts.T1G.T	22	TGGCACTGCCTCTTCCCTGGCT	CAGGGAACGGGCAGAGCATGGATGGAGCTATCGACAGTATAGGAACCTGTCGTGGCTCTACTCATGCACTGCCTCTTCCCTG	Contig129	82	18	22	24	18	48.7805	-52.9	-64.5122	-1.3225
	bpe-miR408d.As.C20G.C	22	ATGCACTGCCTCTTCCCTGGGC	CAGGGAACGGGCAGAGCATGGATGGAGCTATCGACAGTATAGGAACCTGTCGTGGCTCTACTCATGCACTGCCTCTTCCCTG	Contig129	82	18	22	24	18	48.7805	-52.9	-64.5122	-1.3225
	bpe-miR408d.As.C20T.C	22	ATGCACTGCCTCTTCCCTGGTC	CAGGGAACGGGCAGAGCATGGATGGAGCTATCGACAGTATAGGAACCTGTCGTGGCTCTACTCATGCACTGCCTCTTCCCTG	Contig129	82	18	22	24	18	48.7805	-52.9	-64.5122	-1.3225
	bpe-miR408d.As.T	22	ATGCACTGCCTCTTCCCTGGCT	CAGGGAACGGGCAGAGCATGGATGGAGCTATCGACAGTATAGGAACCTGTCGTGGCTCTACTCATGCACTGCCTCTTCCCTG	Contig129	82	18	22	24	18	48.7805	-52.9	-64.5122	-1.3225
	bpe-miR408d.G19T.c	19	TGCACTGCCTCTTCCCTGT	CAGGGAACGGGCAGAGCATGGATGGAGCTATCGACAGTATAGGAACCTGTCGTGGCTCTACTCATGCACTGCCTCTTCCCTG	Contig129	82	18	22	24	18	48.7805	-52.9	-64.5122	-1.3225
	bpe-miR408d.G18C.c	19	TGCACTGCCTCTTCCCTCG	CAGGGAACGGGCAGAGCATGGATGGAGCTATCGACAGTATAGGAACCTGTCGTGGCTCTACTCATGCACTGCCTCTTCCCTG	Contig129	82	18	22	24	18	48.7805	-52.9	-64.5122	-1.3225
	bpe-miR408d.ts	19	GCACTGCCTCTTCCCTGGC	CAGGGAACGGGCAGAGCATGGATGGAGCTATCGACAGTATAGGAACCTGTCGTGGCTCTACTCATGCACTGCCTCTTCCCTG	Contig129	82	18	22	24	18	48.7805	-52.9	-64.5122	-1.3225
bpe-miR3711	bpe-miR3711.T1G.G2C.G3C.G5T.T7C.A8T.G9T.A10C.A11T.G12A.A14C.G16C.G17C.C18A.ct	18	GCCCTCCTTCTAGCGCCA	-
	bpe-miR3711.T1C.G2A.G3A.C4G.G5C.T7C.A8T.G9C.A10C.A11T.G12T.G13C.A14T.G15A.G17C.C18G.T20C.A	21	CAAGCCCTCCTTCTAGCGCCA	-
	bpe-miR3711.T1A.G3C.G5C.C6T.T7C.A8C.G9T.A10T.A11C.G12T.G13A.A14G.G15C.G17C.C19A.t	19	AGCCCTCCTTCTAGCGCCA	-
	bpe-miR3711.G2C.G3A.C4A.T7C.A8C.G9T.A10C.A11C.G12T.G13T.A14C.G15T.G16A.C19G.T20C.CA	22	TCAAGCCCTCCTTCTAGCGCCA	-
	bpe-miR3711.T1C.G2C.G3C.G5T.T7C.A8T.G9T.A10C.A11T.G12A.A14C.G16C.G17C.C18A.ct	18	CCCCTCCTTCTAGCGCCA	-
	bpe-miR3711.ts.G2C.G4C.C5T.T6C.A7C.G8T.A9T.A10C.G11T.G12A.A13G.G14C.G16C.ct	17	GCCCTCCTTCTAGCGCC	-
	bpe-miR3711.T1A.G2A.G5C.A8C.G9C.A10T.A11T.G12C.G13T.G16C.T20A	20	AAGCCCTCCTTCTAGCGCCA	-
	bpe-miR3711.T1C.G3A.C4G.G5C.T7C.A8T.G9C.A10C.A11T.G12T.G13C.A14T.G15A.G17C.C18G.T20C.A	21	CGAGCCCTCCTTCTAGCGCCA	-
	bpe-miR3711.ts.G1A.G4C.A7C.G8C.A9T.A10T.G11C.G12T.G15C.t	18	AGCCCTCCTTCTAGCGCC	-
	bpe-miR3711.tgs.G1A.C2G.G3C.T5C.A6T.G7C.A8C.A9T.G10T.G11C.A12T.G13A.G15C.C16G.t	17	AGCCCTCCTTCTAGCGC	-
	bpe-miR3711.T1A.G2C.G3C.G5T.T7C.A8T.G9T.A10C.A11T.G12A.A14C.G16C.G17C.C18A.ct	18	ACCCTCCTTCTAGCGCCA	-
	bpe-miR3711.T1A.G2A.G5C.T7C.A8T.G9C.A10C.A11T.G12T.G13C.A14T.G15A.G17C.C18G.T20C.A	21	AAGCCCCTCCTTCTAGCGCCA	-
	bpe-miR3711.ts.G1C.G2A.C3A.T6C.A7C.G8T.A9C.A10C.G11T.G12T.A13C.G14T.G15A.C18G.T19C.C	20	CAAGCCCTCCTTCTAGCGCC	-
bpe-miR482a-3p	bpe-miR482a-3p.T3C.A8G	22	TTCCCGAGACCTCCCATTCCAA	GCAGGAAGTTTTCGGTATGGGAGGTTCGGAAAGAATGATTCTTTTTTTCTTTTTTCGAAAGGAATTTCTTCCCGAGACCTCCCATTCCAATGATTTCCTGC	Contig376	101	22	20	22	37	56.4356	48.4	47.9208	0.849123
	bpe-miR482a-3p.T3C.A8G.T	23	TTCCCGAGACCTCCCATTCCAAT	GCAGGAAGTTTTCGGTATGGGAGGTTCGGAAAGAATGATTCTTTTTTTCTTTTTTCGAAAGGAATTTCTTCCCGAGACCTCCCATTCCAATGATTTCCTGC	Contig376	101	22	20	22	37	56.4356	48.4	47.9208	0.849123
	bpe-miR482a-3p.GGs.T2A.C4G.C5G.A8G.A9G.C10T.C11T.T12G.C14G.C15G.T17A.T18A.C19G.C20A.aa	22	GGTATGGGAGGTTGCGGAAAGA	GCAGGAAGTTTTCGGTATGGGAGGTTCGGAAAGAATGATTCTTTTTTTCTTTTTTCGAAAGGAATTTCTTCCCGAGACCTCCCATTCCAATGATTTCCTGC	Contig376	101	22	20	22	37	56.4356	48.4	47.9208	0.849123
	bpe-miR482a-3p.Gs.T1G.T3A.C4T.C5G.A7G.A9G.C10G.C11T.C13G.C15G.A16G.T17A.T18A.C19A.C20G.aa	21	GGTATGGGAGGTTGCGGAAAG	GCAGGAAGTTTTCGGTATGGGAGGTTCGGAAAGAATGATTCTTTTTTTCTTTTTTCGAAAGGAATTTCTTCCCGAGACCTCCCATTCCAATGATTTCCTGC	Contig376	101	22	20	22	37	56.4356	48.4	47.9208	0.849123
bpe-miR5077	bpe-miR5077.gs.G4A	18	TTCACGTCGGGTTCACCA	-
	bpe-miR5077.gts.G3A	17	TCACGTCGGGTTCACCA	-
	bpe-miR5077.gs.G4A.a	17	TTCACGTCGGGTTCACC	-
	bpe-miR5077.gs.G4A.G	19	TTCACGTCGGGTTCACCAG	-
	bpe-miR5077.gts.G3A.G	18	TCACGTCGGGTTCACCAG	-
	bpe-miR5077.G5A	19	GTTCACGTCGGGTTCACCA	-
	bpe-miR5077.G5A.G	20	GTTCACGTCGGGTTCACCAG	-
	bpe-miR5077.As.G5A.G	21	AGTTCACGTCGGGTTCACCAG	-
	bpe-miR5077.G5A.ca	17	GTTCACGTCGGGTTCAC	-
bpe-miR159a.1	bpe-miR159a.1.A	22	TTTGGATTGAAGGGAGCTCTGA	-
	bpe-miR159a.1.Gs.g	21	GTTTGGATTGAAGGGAGCTCT	-
	bpe-miR159a.1.ts.A	21	TTGGATTGAAGGGAGCTCTGA	-
	bpe-miR159a.1.Gs.tg	20	GTTTGGATTGAAGGGAGCTC	-
	bpe-miR159a.1.Gs.G21T	22	GTTTGGATTGAAGGGAGCTCTT	-
	bpe-miR159a.1.T	22	TTTGGATTGAAGGGAGCTCTGT	-
	bpe-miR159a.1.T3A.A	22	TTAGGATTGAAGGGAGCTCTGA	-
	bpe-miR159a.1.T20C.CT	23	TTTGGATTGAAGGGAGCTCCGCT	-
	bpe-miR159a.1.ts.AG	22	TTGGATTGAAGGGAGCTCTGAG	-
	bpe-miR159a.1.Ts.G	23	TTTTGGATTGAAGGGAGCTCTGG	-
	bpe-miR159a.1.Gs.C19A.tg	20	GTTTGGATTGAAGGGAGCTA	-
	bpe-miR159a.1.Gs.C19T.tg	20	GTTTGGATTGAAGGGAGCTT	-
	bpe-miR159a.1.AG	23	TTTGGATTGAAGGGAGCTCTGAG	-
	bpe-miR159a.1	21	TTTGGATTGAAGGGAGCTCTG	-
	bpe-miR159a.1.C19T.T20A	21	TTTGGATTGAAGGGAGCTTAG	-
	bpe-miR159a.1.T20C	21	TTTGGATTGAAGGGAGCTCCG	-
	bpe-miR159a.1.ts.AT	22	TTGGATTGAAGGGAGCTCTGAT	-
	bpe-miR159a.1.tts.AT	21	TGGATTGAAGGGAGCTCTGAT	-
bpe-miR8175	bpe-miR8175.gas	18	TCCCCGGCAACGGCGCCA	-
	bpe-miR8175.gs	19	ATCCCCGGCAACGGCGCCA	-
	bpe-miR8175.Cs	21	CGATCCCCGGCAACGGCGCCA	-
	bpe-miR8175.gas.T1C	18	CCCCCGGCAACGGCGCCA	-
	bpe-miR8175	20	GATCCCCGGCAACGGCGCCA	-
	bpe-miR8175.TCs	22	TCGATCCCCGGCAACGGCGCCA	-
	bpe-miR8175.TCs.ca	20	TCGATCCCCGGCAACGGCGC	-
	bpe-miR8175.Cs.G1A	21	CAATCCCCGGCAACGGCGCCA	-
	bpe-miR8175.Cs.ca	19	CGATCCCCGGCAACGGCGC	-
	bpe-miR8175.gas.a	17	TCCCCGGCAACGGCGCC	-
	bpe-miR8175.gas.A18T	18	TCCCCGGCAACGGCGCCT	-
[truncated: 174 more columns]
