# Supplementary material for: Differentially Expressed Conserved Plant Vegetative Phase-Change-Related microRNAs in Mature and Rejuvenated Silver Birch In Vitro Propagated Tissues
Source: Plants (Basel). 2023 May 16;12(10):1993. doi: 10.3390/plants12101993 (PMC10220576; doi:10.3390/plants12101993)
Supplement: Supplementary file 1 [file plants-12-01993-s001.zip › Supplementary_files_Krivmane_plants/Supplementary_file5.xlsx]

## Sheet: qPCR results
Supplementary file 5. Relative expression (RQ) of precursor miRNAs and comparison with expression of mature miRNAs from sequencing results
Bars indicate minimum and maximum RQ values. Samples labelled with the same letter are not statistically different (p>0.05).
			qPCR results														sequncing results
									miR156_789	RQ	RQ Min	RQ Max
									MAT	0	0	0
									IVM	0.0126676	0.0112869	0.0143116
									REV	0.0679981	0.0483243	0.0961205
									JUV	1	0.903338	1.10701
									miR172_1931	RQ	RQ Min	RQ Max
									MAT	1.72427	1.36439	2.17908
									IVM	0.750826	0.00716842	1.77131
									REV	0.0174163	0.0136352	0.0224665
									JUV	0.0133261	0.0126273	0.0133261
									miR166h_50	RQ	RQ Min	RQ Max
									MAT	0.00189323	0	0.00378646
									IVM	0.0304247	0.026995	0.0343531
									REV	1.02173	0.694864	1.63399
									JUV	0.999586	0.777833	1.28562
									miR169a_800	RQ	RQ Min	RQ Max
									MAT	0.110377	0.00615423	1.97962
									IVM	0.716692	0.254096	2.41953
									REV	0.60508	0.367108	1.1131
									JUV	1	0.301279	3.31919
									miR171h_386	RQ	RQ Min	RQ Max
									MAT	0.132531	0.086761	0.202448
									IVM	1.58203	1.27547	1.96335
									REV	0.386294	0.336363	0.445786
									JUV	1	0.66968	1.49325
									miR394a_134	RQ	RQ Min	RQ Max
									MAT	0.0229157	0.0192516	0.0272772
									IVM	0.139551	0.107261	0.181572
									REV	0.326964	0.211183	0.506316
									JUV	1	0.926072	1.07983
									miR396g_126	RQ	RQ Min	RQ Max
									MAT	0.0609857	0.0316956	0.117343
									IVM	0.438541	0.357667	0.538517
									REV	0.27387	0.244731	0.308914
									JUV	1	0.794195	1.25914
									miR398_485	RQ	RQ Min	RQ Max
									MAT	1.15672	0.855217	1.56452
									IVM	19.3134	17.4378	21.398
									REV	21.7359	17.5767	27.0116
									JUV	1	0.785704	1.27274
									miR408_129	RQ	RQ Min	RQ Max
									MAT	0.0211831	0.00149958	0.299231
									IVM	2.356	2.15978	2.57081
									REV	3.46021	2.84353	4.21238
									JUV	1	0.88702	1.12737
									miR472_1354	RQ	RQ Min	RQ Max
									MAT	2.76312	2.17938	3.5032
									IVM	1.16573	1.04507	1.30084
									REV	0.869153	0.709488	1.06661
									JUV	1	0.950294	1.05231
									miR482_376	RQ	RQ Min	RQ Max
									MAT	0.273502	0.224742	0.332841
									IVM	0.237024	0.188984	0.297612
									REV	0.741745	0.627473	0.878482
									JUV	1	0.705065	1.41831

## Sheet: qPCR primers
Supplementary file 5. Primers used for qPCR
Precursor primer name	IsomiR group name	Birch Contig	Left primer	Length	TM	Right primer	Length	TM	Product size (bp)	Mature miRNA sequence	Precursor sequence
succesfully amplified
miR166h_50	bpe-miR166h-3p	Contig50	GAGGGGAATGAAGCCTGGTC	20	60.11	AAGTTGAGGGGAATGTCGTC	20	57.53	88	GGAATGTCGTCTGGTTCGAGA	GTTGAGGGGAATGAAGCCTGGTCCGAAATCATTCAGATGAGCTTATACTTTGCATGAATGATCTCGAACCAGACGACATTCCCCTCAAC
miR169a_800	bpe-miR169a-3p	Contig800	TGGCTAGCTAGTTTGTTTCCTCT	23	59.42	TGGCATGCGGAGAAGAAAGA	20	59.68	119	GGCAAGTTGTCCTTGGCTAC	AGAAAGTATTATGCAGCCAAGAATGACTTGCCGACTCTTGCTGGCTAGCTAGTTTGTTTCCTCTTTATAATTCAAGTAGTACTACTGATCCAAAAACCGATCGATCAACCAAGTCGGCAAGTTGTCGTTGGCTACATGTTTCTTTCT
miR171h_386	bpe-miR171h	Contig386	AGAGGGATGGAGAAGGGTGT	20	59.58	ACGTGGCTCAATTTGAAGACA	21	58.43	99	TTGAGCCGCGTCAATATCTCC	AGGGATGGAGAAGGGTGTAAAAGGAGATATTGACGCGGCTCAATCAAAATCAAATGGCTAATTTCTCTTTTAACCATGTCTTCAAATTGAGCCACGTTAATACCTTCGTTTACAAAATATTTTAACACCCCTCCATCTCT
miR394a_134	bpe-miR394a-5p	Contig134	CGACAGTGCTTTCATGTGGG	20	59.48	TGCCCACCTCCATGAAAGAG	20	59.67	116	TTGGCATTCTGTCCACCTCC	TCATGTGGGTTTAGCAAAGGGTTTCTAACAGAGTTTATTGGCATTCTGTCCACCTCCCTTCTATAGAAAAACCTGCTCTCTCTCTCTCTTTCATGGAGGTGGGCATACTGCCAACTGAGCTCTGTTGGCTTCTCTTTGTAAGACCCTCGTGA
miR396g_126	bpe-miR396g-5p	Contig126	CCCTGTCTGTATCTTCCCACA	21	58.81	CATGGGTTGCCTATAGATGACC	22	58.32	140	GTTCAATAAAGCTGTGGGA	GCCGATCTTGGACTTCTCTGACCCTGTCTGTATCTTCCCACAGCTTTATTGAACCGCAACACATAAAAAAAAGTCTCTCTGCATGCAAGAGCCCTCATAGTCGATGCAGTTCAAGAAAGCTGTGGAAGAATACAAAGAGGGTCATCTATAGGC
miR398_485	bpe-miR398a-3p	Contig485	AGATCACATGTGGGCGTTCT	20	59.38	CGTGATCGTGTAGTGGAGGA	20	59.38	82	TGTGTTCTCAGGTCGCCCCTT	CAGGGTCGACCTTAGATCACATGTGGGCGTTCTCATGTCCGTCAAATGTGTTCTCAGGTCGCCCCTG
miR408_129	bpe-miR408-5p	Contig129	GGGGAGAAAGAGAGGGAGGA	20	59.66	GCAGTGCATGAGTAGAGCCA	20	60.11	114	ACAGGGAACGGGCAGAGCATG	CAGGGAACGGGCAGAGCATGGATGGAGCTATCGACAGTATAGGAACCTGTCGTGGCTCTACTCATGCACTGCCTCTTCCCTG
miR472_1354	bpe-miR472-3p	Contig1354	GTGAGGAGAGGGAGGGACAA	20	60.25	GGGTGAGTGGGGAAGACAAA	20	59.52	111	TTCCCTACTCCGCCCATGCCAT	GTGTGGAGAAGGTGAGGAGAGGGAGGGACAATCGGAAACCTATGGCATGGGCGGAGTAGGGAAGACAGACAAACAAACTTGATTTCCTCTGCAACAACCTTTTTTGTCTTCCCCACTCACCCATGCCACAACCTTCCGAAAACCCTAACTCCCTCTCCATGCTCTCCCATAT
miR482_376	bpe-miR482-3p	Contig376	TCGGTATGGGAGGTTCGGAA	20	60.32	GGAAAGGGAGGAATGGCAGG	20	60.4	105	TTCCCGAGACCTCCCATTCCAA	GCAGGAAGTTTTCGGTATGGGAGGTTCGGAAAGAATGATTCTTTTTTTCTTTTTTCGAAAGGAATTTCTTCCCGAGACCTCCCATTCCAATGATTTCCTGC
no amplification or non-specific results
miR166a_1270	bpe-miR166a-3p	Contig1270	GGGAATGCTGTCTGGTTCGA	20	60	GCGTGTGGGCAGAGTTATTG	20	59.65	161	TCGGACCAGGCTTCATTCCCC	GGTTGAGGGGAATGCTGTCTGGTTCGAGACCATTTCTCAGAAGCAAAAACAGAGCATCTTTCAAATGATCTCGGACCAGGCTTCATTCCCCCCCAACT
miR166h_1055	bpe-miR166h-5p	Contig1055	GGTCTGGTGTGGGGAATGTT	20	59.89	GCCTGGTCCGAGAAAACTCT	20	59.68	88	GGAATGTTGTCTGGCTCGAGG	GGGGAGGATGAAAAGTGAAGGTCTGGTGTGGGGAATGTTGTCTGGCTCGAGGCCACCAATAGACTGAATGATGACGTTCAGTTTGAGAGAGTTTTCTCGGACCAGGCTTCATTCCCCTCACTATCTTCTCTTTCTCTATCATTTTCTCT
miR166h_2096	bpe-miR166h-5p	Contig2096	GAGGGGAATGTCGGCTGG	18	59.81	GAGGGGAATGAAGCCTGGTC	20	60.11	103	GGAATGTCGGCTGGCTCGAGG	TTTGAGGGGAATGTCGGCTGGCTCGAGGCTTTTTGGCTTTTGGCATGGGTGGTTTTCTCATGAAAAAAAGAACTCTTAAGGCTTCGGACCAGGCTTCATTCCCCTCAAA
miR166h_778	bpe-miR166h-3p	Contig778	GTCTGTGACCAATGCAACTTTC	22	58.37	AACCTGCTGCGAAAATTGGC	20	60.32	120	GGAATGTCGTCTGGTTCGAGA	ATGTCAGGAATAAAGGTTGGTCTGTGACCAATGCAACTTTCATTTTTGCATTGCTCCCGGACCAGGCTTCATTCCTTACAT
miR394a_1109	bpe-miR394a-5p	Contig1109	TAGGGTTTCTCAGGGGCCTT	20	60.18	CCATTTGACATGCTGGCCG	19	59.86	104	GTTCAAGAAAGCCGTGGA	TTGCAGAGCCAATTTGGCATTCTGTCCACCTCCATCAAATGGGCTCTGTAAAAGCTTTTGGAGGCGGCCAGCATGTCAAATGGGCTCTGTAA
miR394a_1643	bpe-miR394a-5p	Contig1643	AACCCATTTGACATGCTGGC	20	59.39	TAGGGTTTTCTCAGGGGCCT	20	60.18	106	GGAGGTGGACAGAATGCCAA	AGAACCCATTTGACATGCTGGCCGCCTCCAAAAAGCTTATACTCACACTTGATGGAGGTGGACAGAATGCCAAATTGGTTCT
miR396g_1060	bpe-miR396g-5p	Contig1060	GGTGCGGCAAAATCCTTTCA	20	59.68	CGTAGCATGCTTTTCCACGG	20	59.9	132	GTTCAAGAAAGCCGTGGA	CATGTTTTCCCACGGCTTTCTTAAGCTTAGTACTTATTTTAATGGATAGGACGTACGAAAGCAGCAAGACCTAAAAGTACCAAGTTCAAGAAAGCCGTGGAAAAGCATG
miR396g_545	bpe-miR396g-5p	Contig545	TCCTATCAGCAATTTTCCACAGC	23	59.3	AGGGTCCTCTCTGTGGTCTT	20	59.51	141	TCCCACAGCTTTATTGAACTG	TTCCACAGCTTTCTTGAATTGTCTGTGTCATTTCTTTTGCATGGGATCACTTAATTTCCTCAGAAGAAATTAATTAAGCTCCCTAATACAGTTCAAGAAAGCTGTGGAA
miR398_357	bpe-miR398a-3p	Contig357	TGACAACTGAGAACACAAAGGTT	23	58.67	ATGGCATGTAAACAGGGAGC	20	58.67	100	TGTGTTCTCAGGTCACCC	CCCCAGAGGAGTGACAACTGAGAACACAAAGGTTGTTGGTGCTATAAAATAATGGCTAATGCACTTTGTGTTCTCAGGTCACCCCTTTGGGG
miR398_3589	bpe-miR398a-3p	Contig3589	GCGATGGTTTGGTGGAGGAA	20	60.61	CTGAGATCACATGTGGGCGT	20	60.11	84	TGTGTTCTCAGGTCGCCCCTT	GATGGTTTGGTGGAGGAAAGTCCCACAGGGGCGACCTGAGAACACATTTGACGGACATGAGAACGCCCACATGTGATCTCAGGTCGACCCTGTAGGGCTCCTCCGCCTTTAATC
