# Supplementary material for: Differentially Expressed Conserved Plant Vegetative Phase-Change-Related microRNAs in Mature and Rejuvenated Silver Birch In Vitro Propagated Tissues
Source: Plants (Basel). 2023 May 16;12(10):1993. doi: 10.3390/plants12101993 (PMC10220576; doi:10.3390/plants12101993)
Supplement: Supplementary file 1 [file plants-12-01993-s001.zip › Supplementary_files_Krivmane_plants/Supplementary_file6.xlsx]

## Sheet: MAT vs JUV target genes
Supplementary file 5. Target genes of differentially expressed miRNAs
MiRNA isomiR group name	miRNA name	miRNA_sequence	Target_Acc.	Expectation	miRNA_start	miRNA_end	Target_start	Target_end	miRNA_aligned_fragment	alignment	Target_aligned_fragment	Inhibition	Target_Desc.
bpe-miR156a-5p	bpe-miR156a-5p	TGACAGAAGAGAGTGAGCAC	TC170313	1	1	20	45	64	UGACAGAAGAGAGUGAGCAC	:::::: :::::::::::::	GUGCUCUCUCUCUUCUGUCA	Cleavage
	bpe-miR156a-5p	TGACAGAAGAGAGTGAGCAC	TC159682	1	1	20	42	61	UGACAGAAGAGAGUGAGCAC	:::::: :::::::::::::	GUGCUCUCUCUCUUCUGUCA	Cleavage	similar to UniRef100_A7PFE5 Cluster: Chromosome chr11 scaffold_14, whole genome shotgun sequence; n=1; Vitis vinifera|Rep: Chromosome chr11 scaffold_14, whole genome shotgun sequence - Vitis vinifera (Grape), partial (6%)
	bpe-miR156a-5p	TGACAGAAGAGAGTGAGCAC	CN523533	1	1	20	538	557	UGACAGAAGAGAGUGAGCAC	:::::: :::::::::::::	GUGCUCUCUCUCUUCUGUCA	Cleavage	homologue to UniRef100_A2YGR5 Cluster: Squamosa promoter-binding-like protein 12; n=1; Oryza sativa Indica Group|Rep: Squamosa promoter-binding-like protein 12 - Oryza sativa subsp. indica (Rice), partial (13%)
	bpe-miR156a-5p	TGACAGAAGAGAGTGAGCAC	TC162283	1	1	20	192	211	UGACAGAAGAGAGUGAGCAC	:::::: :::::::::::::	GUGCUCUCUCUCUUCUGUCA	Cleavage	similar to UniRef100_A7PFE5 Cluster: Chromosome chr11 scaffold_14, whole genome shotgun sequence; n=1; Vitis vinifera|Rep: Chromosome chr11 scaffold_14, whole genome shotgun sequence - Vitis vinifera (Grape), partial (6%)
	bpe-miR156a-5p	TGACAGAAGAGAGTGAGCAC	TC139619	1	1	20	121	140	UGACAGAAGAGAGUGAGCAC	:::::: :::::::::::::	GUGCUCUCUCUCUUCUGUCA	Cleavage	similar to UniRef100_Q94JW8 Cluster: Squamosa promoter-binding-like protein 6; n=1; Arabidopsis thaliana|Rep: Squamosa promoter-binding-like protein 6 - Arabidopsis thaliana (Mouse-ear cress), partial (9%)
	bpe-miR156a-5p	TGACAGAAGAGAGTGAGCAC	TC140194	1	1	20	391	410	UGACAGAAGAGAGUGAGCAC	:::::: :::::::::::::	GUGCUCUCUCUCUUCUGUCA	Cleavage	similar to UniRef100_A7PKG5 Cluster: Chromosome chr15 scaffold_19, whole genome shotgun sequence; n=1; Vitis vinifera|Rep: Chromosome chr15 scaffold_19, whole genome shotgun sequence - Vitis vinifera (Grape), partial (67%)
	bpe-miR156a-5p	TGACAGAAGAGAGTGAGCAC	TC161130	1	1	20	423	442	UGACAGAAGAGAGUGAGCAC	:::::: :::::::::::::	GUGCUCUCUCUCUUCUGUCA	Cleavage	similar to UniRef100_Q94JW8 Cluster: Squamosa promoter-binding-like protein 6; n=1; Arabidopsis thaliana|Rep: Squamosa promoter-binding-like protein 6 - Arabidopsis thaliana (Mouse-ear cress), partial (12%)
	bpe-miR156a-5p	TGACAGAAGAGAGTGAGCAC	TC188289	1	1	20	481	500	UGACAGAAGAGAGUGAGCAC	:::::: :::::::::::::	GUGCUCUCUCUCUUCUGUCA	Cleavage	similar to UniRef100_A7PFE5 Cluster: Chromosome chr11 scaffold_14, whole genome shotgun sequence; n=1; Vitis vinifera|Rep: Chromosome chr11 scaffold_14, whole genome shotgun sequence - Vitis vinifera (Grape), partial (13%)
	bpe-miR156a-5p	TGACAGAAGAGAGTGAGCAC	TC179932	1	1	20	832	851	UGACAGAAGAGAGUGAGCAC	:::::: :::::::::::::	GUGCUCUCUCUCUUCUGUCA	Cleavage	similar to UniRef100_A7QP31 Cluster: Chromosome chr1 scaffold_136, whole genome shotgun sequence; n=1; Vitis vinifera|Rep: Chromosome chr1 scaffold_136, whole genome shotgun sequence - Vitis vinifera (Grape), partial (53%)
	bpe-miR156a-5p	TGACAGAAGAGAGTGAGCAC	TC155685	1	1	20	1162	1181	UGACAGAAGAGAGUGAGCAC	:::::: :::::::::::::	GUGCUCUCUCUCUUCUGUCA	Cleavage	similar to UniRef100_Q6YZE8 Cluster: Squamosa promoter-binding-like protein 16; n=1; Oryza sativa Japonica Group|Rep: Squamosa promoter-binding-like protein 16 - Oryza sativa subsp. japonica (Rice), partial (24%)
	bpe-miR156a-5p	TGACAGAAGAGAGTGAGCAC	TC150948	1	1	20	342	361	UGACAGAAGAGAGUGAGCAC	:::::: :::::::::::::	GUGCUCUCUCUCUUCUGUCA	Cleavage	similar to UniRef100_A7PFE5 Cluster: Chromosome chr11 scaffold_14, whole genome shotgun sequence; n=1; Vitis vinifera|Rep: Chromosome chr11 scaffold_14, whole genome shotgun sequence - Vitis vinifera (Grape), partial (10%)
	bpe-miR156a-5p	TGACAGAAGAGAGTGAGCAC	TC158039	1	1	20	696	715	UGACAGAAGAGAGUGAGCAC	:::::: :::::::::::::	GUGCUCUCUCUCUUCUGUCA	Cleavage	similar to UniRef100_A7PFE5 Cluster: Chromosome chr11 scaffold_14, whole genome shotgun sequence; n=1; Vitis vinifera|Rep: Chromosome chr11 scaffold_14, whole genome shotgun sequence - Vitis vinifera (Grape), partial (49%)
	bpe-miR156a-5p	TGACAGAAGAGAGTGAGCAC	TC183825	1	1	20	401	420	UGACAGAAGAGAGUGAGCAC	:::::: :::::::::::::	GUGCUCUCUCUCUUCUGUCA	Cleavage	similar to UniRef100_A7PFE5 Cluster: Chromosome chr11 scaffold_14, whole genome shotgun sequence; n=1; Vitis vinifera|Rep: Chromosome chr11 scaffold_14, whole genome shotgun sequence - Vitis vinifera (Grape), partial (11%)
	bpe-miR156a-5p	TGACAGAAGAGAGTGAGCAC	TC140316	1	1	20	1078	1097	UGACAGAAGAGAGUGAGCAC	:::::: :::::::::::::	GUGCUCUCUCUCUUCUGUCA	Cleavage	similar to UniRef100_A7PKG5 Cluster: Chromosome chr15 scaffold_19, whole genome shotgun sequence; n=1; Vitis vinifera|Rep: Chromosome chr15 scaffold_19, whole genome shotgun sequence - Vitis vinifera (Grape), partial (72%)
	bpe-miR156a-5p	TGACAGAAGAGAGTGAGCAC	TC156238	1	1	20	628	647	UGACAGAAGAGAGUGAGCAC	::::: :::::::::::::	AUGCUCUCUCUCUUCUGUCA	Cleavage	similar to UniRef100_A7QPU0 Cluster: Chromosome chr10 scaffold_138, whole genome shotgun sequence; n=1; Vitis vinifera|Rep: Chromosome chr10 scaffold_138, whole genome shotgun sequence - Vitis vinifera (Grape), partial (69%)
	bpe-miR156a-5p	TGACAGAAGAGAGTGAGCAC	TC143610	1	1	20	619	638	UGACAGAAGAGAGUGAGCAC	::::: :::::::::::::	AUGCUCUCUCUCUUCUGUCA	Cleavage	similar to UniRef100_P93015 Cluster: Squamosa promoter-binding-like protein 3; n=1; Arabidopsis thaliana|Rep: Squamosa promoter-binding-like protein 3 - Arabidopsis thaliana (Mouse-ear cress), partial (70%)
	bpe-miR156a-5p	TGACAGAAGAGAGTGAGCAC	TC140187	1	1	20	727	746	UGACAGAAGAGAGUGAGCAC	::::: :::::::::::::	AUGCUCUCUCUCUUCUGUCA	Cleavage	similar to UniRef100_Q84JE4 Cluster: Squamosa promoter binding like-protein; n=1; Betula pendula|Rep: Squamosa promoter binding like-protein - Betula verrucosa (White birch) (Betula pendula), partial (80%)
	bpe-miR156a-5p	TGACAGAAGAGAGTGAGCAC	TC156260	1	1	20	646	665	UGACAGAAGAGAGUGAGCAC	::::: :::::::::::::	AUGCUCCCUCUCUUCUGUCA	Cleavage	weakly similar to UniRef100_A7QPU0 Cluster: Chromosome chr10 scaffold_138, whole genome shotgun sequence; n=1; Vitis vinifera|Rep: Chromosome chr10 scaffold_138, whole genome shotgun sequence - Vitis vinifera (Grape), partial (78%)
	bpe-miR156a-5p	TGACAGAAGAGAGTGAGCAC	TC167753	1	1	20	638	657	UGACAGAAGAGAGUGAGCAC	::::: :::::::::::::	AUGCUCCCUCUCUUCUGUCA	Cleavage	similar to UniRef100_Q5U8L4 Cluster: SBP transcription factor; n=1; Gossypium hirsutum|Rep: SBP transcription factor - Gossypium hirsutum (Upland cotton) (Gossypium mexicanum), partial (70%)
	bpe-miR156a-5p	TGACAGAAGAGAGTGAGCAC	TC138639	1	1	20	681	700	UGACAGAAGAGAGUGAGCAC	::::: :::::::::::::	UUGCUCUCUCUCUUCUGUCA	Cleavage	similar to UniRef100_A7PJ70 Cluster: Chromosome chr12 scaffold_18, whole genome shotgun sequence; n=1; Vitis vinifera|Rep: Chromosome chr12 scaffold_18, whole genome shotgun sequence - Vitis vinifera (Grape), partial (70%)
	bpe-miR156a-5p	TGACAGAAGAGAGTGAGCAC	TC183201	1	1	20	905	924	UGACAGAAGAGAGUGAGCAC	::::: :::::::::::::	UUGCUCUCUCUCUUCUGUCA	Cleavage	similar to UniRef100_Q52UU1 Cluster: Squamosa promoter binding-like protein; n=1; Betula platyphylla|Rep: Squamosa promoter binding-like protein - Betula platyphylla, partial (74%)
	bpe-miR156a-5p	TGACAGAAGAGAGTGAGCAC	TC181875	1	1	20	980	999	UGACAGAAGAGAGUGAGCAC	::::: :::::::::::::	UUGCUCUCUCUCUUCUGUCA	Cleavage	homologue to UniRef100_Q96035 Cluster: Cytochrome oxidase subunit 3; n=1; Magnolia grandiflora|Rep: Cytochrome oxidase subunit 3 - Magnolia grandiflora (Southern magnolia), partial (69%)
	bpe-miR156a-5p	TGACAGAAGAGAGTGAGCAC	TC159843	2	1	20	32	51	UGACAGAAGAGAGUGAGCAC	::::. :::::::.:::::	AUGCUUCCUCUCUUUUGUCA	Cleavage	similar to UniRef100_P93484 Cluster: Vacuolar-sorting receptor 1 precursor; n=1; Pisum sativum|Rep: Vacuolar-sorting receptor 1 precursor - Pisum sativum (Garden pea), partial (31%)
	bpe-miR156a-5p	TGACAGAAGAGAGTGAGCAC	TC138813	2.5	1	20	40	59	UGACAGAAGAGAGUGAGCAC	:::::::::.:::::::	AAGCUCACUCUUUUCUGUCC	Cleavage	UniRef100_Q7EUR6 Cluster: AT4g05320/C17L7_240; n=8; core eudicotyledons|Rep: AT4g05320/C17L7_240 - Arabidopsis thaliana (Mouse-ear cress), partial (80%)
	bpe-miR156a-5p	TGACAGAAGAGAGTGAGCAC	TC146251	2.5	1	20	794	813	UGACAGAAGAGAGUGAGCAC	:::..::.::::::::::	UAGCUUGCUUUCUUCUGUCA	Cleavage	similar to UniRef100_A7QQJ3 Cluster: Chromosome undetermined scaffold_143, whole genome shotgun sequence; n=1; Vitis vinifera|Rep: Chromosome undetermined scaffold_143, whole genome shotgun sequence - Vitis vinifera (Grape), partial (51%)
	bpe-miR156a-5p	TGACAGAAGAGAGTGAGCAC	TC154785	2.5	1	20	65	84	UGACAGAAGAGAGUGAGCAC	:::::.::::::::: :.:	CUGCUCGCUCUCUUCUCUUA	Cleavage	similar to UniRef100_Q2HRW5 Cluster: Syntaxin, N-terminal; n=1; Medicago truncatula|Rep: Syntaxin, N-terminal - Medicago truncatula (Barrel medic), partial (77%)
	bpe-miR156a-5p	TGACAGAAGAGAGTGAGCAC	TC167513	2.5	1	20	259	278	UGACAGAAGAGAGUGAGCAC	:::::::::::::.: :.:	CUGCUCACUCUCUUUUUUUA	Cleavage	similar to UniRef100_Q9XGI4 Cluster: Cyclin A2; n=1; Solanum lycopersicum|Rep: Cyclin A2 - Solanum lycopersicum (Tomato) (Lycopersicon esculentum), partial (20%)
	bpe-miR156a-5p	TGACAGAAGAGAGTGAGCAC	TC162499	2.5	1	20	11	30	UGACAGAAGAGAGUGAGCAC	: ::: :::::::.:::::	UUCCUCUCUCUCUUUUGUCA	Cleavage	similar to UniRef100_Q3E7D0 Cluster: Nucleobase-ascorbate transporter 12; n=3; Arabidopsis thaliana|Rep: Nucleobase-ascorbate transporter 12 - Arabidopsis thaliana (Mouse-ear cress), partial (8%)
	bpe-miR156a-5p	TGACAGAAGAGAGTGAGCAC	AJ407505	3	1	20	249	267	UGACAGAAGAGAGUGAGCAC	::::::::::::::: ::::	GUGCUCACUCUCUUC-GUCA	Cleavage	UniRef100_A7PEL7 Cluster: Chromosome chr11 scaffold_13 whole genome shotgun sequence; n=1; Vitis vinifera|Rep:, partial (1%)
	bpe-miR156a-5p	TGACAGAAGAGAGTGAGCAC	TC179911	3	1	20	452	471	UGACAGAAGAGAGUGAGCAC	::::::.::::::::.:	AGACUCACUUUCUUCUGUUA	Cleavage	similar to UniRef100_Q6W2J5 Cluster: VDAC1.1; n=1; Lotus japonicus|Rep: VDAC1.1 - Lotus japonicus, partial (37%)
	bpe-miR156a-5p	TGACAGAAGAGAGTGAGCAC	TC145461	3	1	20	1022	1041	UGACAGAAGAGAGUGAGCAC	::::::.::::::::.:	NNNCUCACUUUCUUCUGUUA	Cleavage	similar to UniRef100_Q6W2J5 Cluster: VDAC1.1; n=1; Lotus japonicus|Rep: VDAC1.1 - Lotus japonicus, complete
	bpe-miR156a-5p	TGACAGAAGAGAGTGAGCAC	TC140389	3	1	20	1025	1044	UGACAGAAGAGAGUGAGCAC	::::::.::::::::.:	AGACUCACUUUCUUCUGUUA	Cleavage	similar to UniRef100_Q6W2J5 Cluster: VDAC1.1; n=1; Lotus japonicus|Rep: VDAC1.1 - Lotus japonicus, partial (98%)
	bpe-miR156a-5p	TGACAGAAGAGAGTGAGCAC	TC180503	3	1	20	248	267	UGACAGAAGAGAGUGAGCAC	::.::..:.:::::::::	CUGUUCGUUUUCUUCUGUCC	Cleavage	weakly similar to UniRef100_A4BRK1 Cluster: Probable transporter; n=1; Nitrococcus mobilis Nb-231|Rep: Probable transporter - Nitrococcus mobilis Nb-231, partial (5%)
	bpe-miR156a-5p	TGACAGAAGAGAGTGAGCAC	TC156083	3	1	20	19	38	UGACAGAAGAGAGUGAGCAC	:::::::.:::::: :::	AAGCUCACUUUCUUCUUUCA	Cleavage	weakly similar to UniRef100_Q84Q77 Cluster: 17.4 kDa class I heat shock protein 3; n=3; Oryza sativa|Rep: 17.4 kDa class I heat shock protein 3 - Oryza sativa subsp. japonica (Rice), partial (42%)
	bpe-miR156a-5p	TGACAGAAGAGAGTGAGCAC	TC157471	3	1	20	142	161	UGACAGAAGAGAGUGAGCAC	:::::::.:::::: :::	AAGCUCACUUUCUUCUUUCA	Cleavage
	bpe-miR156a-5p	TGACAGAAGAGAGTGAGCAC	TC170385	3	1	20	146	165	UGACAGAAGAGAGUGAGCAC	::::..::::::::: :.:	CUGCUUGCUCUCUUCUCUUA	Cleavage	homologue to UniRef100_A9V995 Cluster: Predicted protein; n=1; Monosiga brevicollis MX1|Rep: Predicted protein - Monosiga brevicollis MX1, partial (15%)
	bpe-miR156a-5p	TGACAGAAGAGAGTGAGCAC	TC147463	3	1	20	154	173	UGACAGAAGAGAGUGAGCAC	::::..::::::::: :.:	CUGCUUGCUCUCUUCUAUUA	Cleavage	similar to UniRef100_A3IAY7 Cluster: Nitrogen fixation protein; n=1; Bacillus sp. B14905|Rep: Nitrogen fixation protein - Bacillus sp. B14905, partial (19%)
	bpe-miR156a-5p	TGACAGAAGAGAGTGAGCAC	DT469891	3	1	20	665	684	UGACAGAAGAGAGUGAGCAC	::.:.:.:.:.::::::.:	AUGUUUAUUUUUUUCUGUUA	Cleavage	UniRef100_A7RQ83 Cluster: Predicted protein; n=1; Nematostella vectensis|Rep: Predicted protein - Nematostella vectensis (Starlet sea anemone), partial (12%)
	bpe-miR156a-5p	TGACAGAAGAGAGTGAGCAC	TC179956	3	1	20	1293	1312	UGACAGAAGAGAGUGAGCAC	::::::::. :::.:::.:	CUGCUCACUUGCUUUUGUUA	Translation	similar to UniRef100_A7NUJ3 Cluster: Chromosome chr18 scaffold_1, whole genome shotgun sequence; n=1; Vitis vinifera|Rep: Chromosome chr18 scaffold_1, whole genome shotgun sequence - Vitis vinifera (Grape), partial (49%)
	bpe-miR156a-5p	TGACAGAAGAGAGTGAGCAC	TC181170	3	1	20	1439	1458	UGACAGAAGAGAGUGAGCAC	::::..::::.:::::: :	UUGCUUGCUCUUUUCUGUAA	Cleavage	similar to UniRef100_A7NUV0 Cluster: Chromosome chr18 scaffold_1, whole genome shotgun sequence; n=1; Vitis vinifera|Rep: Chromosome chr18 scaffold_1, whole genome shotgun sequence - Vitis vinifera (Grape), partial (90%)
	bpe-miR156a-5p	TGACAGAAGAGAGTGAGCAC	DB876395	3	1	20	32	51	UGACAGAAGAGAGUGAGCAC	::.:: ::::::::: :::	CUGUUCUCUCUCUUCUCUCA	Cleavage	similar to UniRef100_Q5BJ88 Cluster: Wasf1 protein; n=1; Xenopus tropicalis|Rep: Wasf1 protein - Xenopus tropicalis (Western clawed frog) (Silurana tropicalis), partial (5%)
	bpe-miR156a-5p	TGACAGAAGAGAGTGAGCAC	TC171875	3	1	19	1	19	UGACAGAAGAGAGUGAGCA	: ::.:: :::::::::::	UACUUACACUCUUCUGUCA	Cleavage	homologue to UniRef100_A7QDX2 Cluster: Chromosome chr4 scaffold_83, whole genome shotgun sequence; n=1; Vitis vinifera|Rep: Chromosome chr4 scaffold_83, whole genome shotgun sequence - Vitis vinifera (Grape), partial (23%)
	bpe-miR156a-5p	TGACAGAAGAGAGTGAGCAC	TC176385	3	1	20	506	525	UGACAGAAGAGAGUGAGCAC	: .: ::::::::::::.:	UUUUUAACUCUCUUCUGUUA	Cleavage	similar to UniRef100_A7PU50 Cluster: Chromosome chr7 scaffold_31, whole genome shotgun sequence; n=1; Vitis vinifera|Rep: Chromosome chr7 scaffold_31, whole genome shotgun sequence - Vitis vinifera (Grape), partial (6%)
	bpe-miR156a-5p	TGACAGAAGAGAGTGAGCAC	DB880423	3	1	20	85	104	UGACAGAAGAGAGUGAGCAC	: ::. .::::::::::::	UUUCUUUUUCUCUUCUGUCA	Cleavage	similar to UniRef100_A7PEZ5 Cluster: Chromosome chr11 scaffold_13, whole genome shotgun sequence; n=1; Vitis vinifera|Rep: Chromosome chr11 scaffold_13, whole genome shotgun sequence - Vitis vinifera (Grape), partial (51%)
	bpe-miR156a-5p.A	TGACAGAAGAGAGTGAGCACA	TC170313	1	1	21	44	64	UGACAGAAGAGAGUGAGCACA	::::::: :::::::::::::	UGUGCUCUCUCUCUUCUGUCA	Cleavage
	bpe-miR156a-5p.A	TGACAGAAGAGAGTGAGCACA	TC139619	1	1	21	120	140	UGACAGAAGAGAGUGAGCACA	::::::: :::::::::::::	UGUGCUCUCUCUCUUCUGUCA	Cleavage	similar to UniRef100_Q94JW8 Cluster: Squamosa promoter-binding-like protein 6; n=1; Arabidopsis thaliana|Rep: Squamosa promoter-binding-like protein 6 - Arabidopsis thaliana (Mouse-ear cress), partial (9%)
	bpe-miR156a-5p.A	TGACAGAAGAGAGTGAGCACA	TC140194	1	1	21	390	410	UGACAGAAGAGAGUGAGCACA	::::::: :::::::::::::	UGUGCUCUCUCUCUUCUGUCA	Cleavage	similar to UniRef100_A7PKG5 Cluster: Chromosome chr15 scaffold_19, whole genome shotgun sequence; n=1; Vitis vinifera|Rep: Chromosome chr15 scaffold_19, whole genome shotgun sequence - Vitis vinifera (Grape), partial (67%)
	bpe-miR156a-5p.A	TGACAGAAGAGAGTGAGCACA	TC161130	1	1	21	422	442	UGACAGAAGAGAGUGAGCACA	::::::: :::::::::::::	UGUGCUCUCUCUCUUCUGUCA	Cleavage	similar to UniRef100_Q94JW8 Cluster: Squamosa promoter-binding-like protein 6; n=1; Arabidopsis thaliana|Rep: Squamosa promoter-binding-like protein 6 - Arabidopsis thaliana (Mouse-ear cress), partial (12%)
	bpe-miR156a-5p.A	TGACAGAAGAGAGTGAGCACA	TC155685	1	1	21	1161	1181	UGACAGAAGAGAGUGAGCACA	::::::: :::::::::::::	UGUGCUCUCUCUCUUCUGUCA	Cleavage	similar to UniRef100_Q6YZE8 Cluster: Squamosa promoter-binding-like protein 16; n=1; Oryza sativa Japonica Group|Rep: Squamosa promoter-binding-like protein 16 - Oryza sativa subsp. japonica (Rice), partial (24%)
	bpe-miR156a-5p.A	TGACAGAAGAGAGTGAGCACA	TC140316	1	1	21	1077	1097	UGACAGAAGAGAGUGAGCACA	::::::: :::::::::::::	UGUGCUCUCUCUCUUCUGUCA	Cleavage	similar to UniRef100_A7PKG5 Cluster: Chromosome chr15 scaffold_19, whole genome shotgun sequence; n=1; Vitis vinifera|Rep: Chromosome chr15 scaffold_19, whole genome shotgun sequence - Vitis vinifera (Grape), partial (72%)
	bpe-miR156a-5p.A	TGACAGAAGAGAGTGAGCACA	TC159682	1	1	21	41	61	UGACAGAAGAGAGUGAGCACA	:::::: :::::::::::::	CGUGCUCUCUCUCUUCUGUCA	Cleavage	similar to UniRef100_A7PFE5 Cluster: Chromosome chr11 scaffold_14, whole genome shotgun sequence; n=1; Vitis vinifera|Rep: Chromosome chr11 scaffold_14, whole genome shotgun sequence - Vitis vinifera (Grape), partial (6%)
	bpe-miR156a-5p.A	TGACAGAAGAGAGTGAGCACA	CN523533	1	1	21	537	557	UGACAGAAGAGAGUGAGCACA	:::::: :::::::::::::	CGUGCUCUCUCUCUUCUGUCA	Cleavage	homologue to UniRef100_A2YGR5 Cluster: Squamosa promoter-binding-like protein 12; n=1; Oryza sativa Indica Group|Rep: Squamosa promoter-binding-like protein 12 - Oryza sativa subsp. indica (Rice), partial (13%)
	bpe-miR156a-5p.A	TGACAGAAGAGAGTGAGCACA	TC162283	1	1	21	191	211	UGACAGAAGAGAGUGAGCACA	:::::: :::::::::::::	CGUGCUCUCUCUCUUCUGUCA	Cleavage	similar to UniRef100_A7PFE5 Cluster: Chromosome chr11 scaffold_14, whole genome shotgun sequence; n=1; Vitis vinifera|Rep: Chromosome chr11 scaffold_14, whole genome shotgun sequence - Vitis vinifera (Grape), partial (6%)
	bpe-miR156a-5p.A	TGACAGAAGAGAGTGAGCACA	TC188289	1	1	21	480	500	UGACAGAAGAGAGUGAGCACA	:::::: :::::::::::::	CGUGCUCUCUCUCUUCUGUCA	Cleavage	similar to UniRef100_A7PFE5 Cluster: Chromosome chr11 scaffold_14, whole genome shotgun sequence; n=1; Vitis vinifera|Rep: Chromosome chr11 scaffold_14, whole genome shotgun sequence - Vitis vinifera (Grape), partial (13%)
	bpe-miR156a-5p.A	TGACAGAAGAGAGTGAGCACA	TC179932	1	1	21	831	851	UGACAGAAGAGAGUGAGCACA	:::::: :::::::::::::	CGUGCUCUCUCUCUUCUGUCA	Cleavage	similar to UniRef100_A7QP31 Cluster: Chromosome chr1 scaffold_136, whole genome shotgun sequence; n=1; Vitis vinifera|Rep: Chromosome chr1 scaffold_136, whole genome shotgun sequence - Vitis vinifera (Grape), partial (53%)
	bpe-miR156a-5p.A	TGACAGAAGAGAGTGAGCACA	TC150948	1	1	21	341	361	UGACAGAAGAGAGUGAGCACA	:::::: :::::::::::::	CGUGCUCUCUCUCUUCUGUCA	Cleavage	similar to UniRef100_A7PFE5 Cluster: Chromosome chr11 scaffold_14, whole genome shotgun sequence; n=1; Vitis vinifera|Rep: Chromosome chr11 scaffold_14, whole genome shotgun sequence - Vitis vinifera (Grape), partial (10%)
	bpe-miR156a-5p.A	TGACAGAAGAGAGTGAGCACA	TC158039	1	1	21	695	715	UGACAGAAGAGAGUGAGCACA	:::::: :::::::::::::	CGUGCUCUCUCUCUUCUGUCA	Cleavage	similar to UniRef100_A7PFE5 Cluster: Chromosome chr11 scaffold_14, whole genome shotgun sequence; n=1; Vitis vinifera|Rep: Chromosome chr11 scaffold_14, whole genome shotgun sequence - Vitis vinifera (Grape), partial (49%)
	bpe-miR156a-5p.A	TGACAGAAGAGAGTGAGCACA	TC183825	1	1	21	400	420	UGACAGAAGAGAGUGAGCACA	:::::: :::::::::::::	CGUGCUCUCUCUCUUCUGUCA	Cleavage	similar to UniRef100_A7PFE5 Cluster: Chromosome chr11 scaffold_14, whole genome shotgun sequence; n=1; Vitis vinifera|Rep: Chromosome chr11 scaffold_14, whole genome shotgun sequence - Vitis vinifera (Grape), partial (11%)
	bpe-miR156a-5p.A	TGACAGAAGAGAGTGAGCACA	TC156238	1	1	21	627	647	UGACAGAAGAGAGUGAGCACA	::::: :::::::::::::	CAUGCUCUCUCUCUUCUGUCA	Cleavage	similar to UniRef100_A7QPU0 Cluster: Chromosome chr10 scaffold_138, whole genome shotgun sequence; n=1; Vitis vinifera|Rep: Chromosome chr10 scaffold_138, whole genome shotgun sequence - Vitis vinifera (Grape), partial (69%)
	bpe-miR156a-5p.A	TGACAGAAGAGAGTGAGCACA	TC143610	1	1	21	618	638	UGACAGAAGAGAGUGAGCACA	::::: :::::::::::::	CAUGCUCUCUCUCUUCUGUCA	Cleavage	similar to UniRef100_P93015 Cluster: Squamosa promoter-binding-like protein 3; n=1; Arabidopsis thaliana|Rep: Squamosa promoter-binding-like protein 3 - Arabidopsis thaliana (Mouse-ear cress), partial (70%)
	bpe-miR156a-5p.A	TGACAGAAGAGAGTGAGCACA	TC140187	1	1	21	726	746	UGACAGAAGAGAGUGAGCACA	::::: :::::::::::::	CAUGCUCUCUCUCUUCUGUCA	Cleavage	similar to UniRef100_Q84JE4 Cluster: Squamosa promoter binding like-protein; n=1; Betula pendula|Rep: Squamosa promoter binding like-protein - Betula verrucosa (White birch) (Betula pendula), partial (80%)
	bpe-miR156a-5p.A	TGACAGAAGAGAGTGAGCACA	TC156260	1	1	21	645	665	UGACAGAAGAGAGUGAGCACA	::::: :::::::::::::	CAUGCUCCCUCUCUUCUGUCA	Cleavage	weakly similar to UniRef100_A7QPU0 Cluster: Chromosome chr10 scaffold_138, whole genome shotgun sequence; n=1; Vitis vinifera|Rep: Chromosome chr10 scaffold_138, whole genome shotgun sequence - Vitis vinifera (Grape), partial (78%)
	bpe-miR156a-5p.A	TGACAGAAGAGAGTGAGCACA	TC167753	1	1	21	637	657	UGACAGAAGAGAGUGAGCACA	::::: :::::::::::::	CAUGCUCCCUCUCUUCUGUCA	Cleavage	similar to UniRef100_Q5U8L4 Cluster: SBP transcription factor; n=1; Gossypium hirsutum|Rep: SBP transcription factor - Gossypium hirsutum (Upland cotton) (Gossypium mexicanum), partial (70%)
	bpe-miR156a-5p.A	TGACAGAAGAGAGTGAGCACA	TC138639	1	1	21	680	700	UGACAGAAGAGAGUGAGCACA	::::: :::::::::::::	AUUGCUCUCUCUCUUCUGUCA	Cleavage	similar to UniRef100_A7PJ70 Cluster: Chromosome chr12 scaffold_18, whole genome shotgun sequence; n=1; Vitis vinifera|Rep: Chromosome chr12 scaffold_18, whole genome shotgun sequence - Vitis vinifera (Grape), partial (70%)
	bpe-miR156a-5p.A	TGACAGAAGAGAGTGAGCACA	TC183201	1	1	21	904	924	UGACAGAAGAGAGUGAGCACA	::::: :::::::::::::	AUUGCUCUCUCUCUUCUGUCA	Cleavage	similar to UniRef100_Q52UU1 Cluster: Squamosa promoter binding-like protein; n=1; Betula platyphylla|Rep: Squamosa promoter binding-like protein - Betula platyphylla, partial (74%)
	bpe-miR156a-5p.A	TGACAGAAGAGAGTGAGCACA	TC181875	1	1	21	979	999	UGACAGAAGAGAGUGAGCACA	::::: :::::::::::::	AUUGCUCUCUCUCUUCUGUCA	Cleavage	homologue to UniRef100_Q96035 Cluster: Cytochrome oxidase subunit 3; n=1; Magnolia grandiflora|Rep: Cytochrome oxidase subunit 3 - Magnolia grandiflora (Southern magnolia), partial (69%)
	bpe-miR156a-5p.A	TGACAGAAGAGAGTGAGCACA	TC159843	2	1	21	31	51	UGACAGAAGAGAGUGAGCACA	::::. :::::::.:::::	GAUGCUUCCUCUCUUUUGUCA	Cleavage	similar to UniRef100_P93484 Cluster: Vacuolar-sorting receptor 1 precursor; n=1; Pisum sativum|Rep: Vacuolar-sorting receptor 1 precursor - Pisum sativum (Garden pea), partial (31%)
	bpe-miR156a-5p.A	TGACAGAAGAGAGTGAGCACA	TC138813	2.5	1	21	39	59	UGACAGAAGAGAGUGAGCACA	:::::::::.:::::::	AAAGCUCACUCUUUUCUGUCC	Cleavage	UniRef100_Q7EUR6 Cluster: AT4g05320/C17L7_240; n=8; core eudicotyledons|Rep: AT4g05320/C17L7_240 - Arabidopsis thaliana (Mouse-ear cress), partial (80%)
	bpe-miR156a-5p.A	TGACAGAAGAGAGTGAGCACA	TC146251	2.5	1	21	793	813	UGACAGAAGAGAGUGAGCACA	:::..::.::::::::::	UUAGCUUGCUUUCUUCUGUCA	Cleavage	similar to UniRef100_A7QQJ3 Cluster: Chromosome undetermined scaffold_143, whole genome shotgun sequence; n=1; Vitis vinifera|Rep: Chromosome undetermined scaffold_143, whole genome shotgun sequence - Vitis vinifera (Grape), partial (51%)
	bpe-miR156a-5p.A	TGACAGAAGAGAGTGAGCACA	TC167513	2.5	1	21	258	278	UGACAGAAGAGAGUGAGCACA	: :::::::::::::.: :.:	UCUGCUCACUCUCUUUUUUUA	Cleavage	similar to UniRef100_Q9XGI4 Cluster: Cyclin A2; n=1; Solanum lycopersicum|Rep: Cyclin A2 - Solanum lycopersicum (Tomato) (Lycopersicon esculentum), partial (20%)
	bpe-miR156a-5p.A	TGACAGAAGAGAGTGAGCACA	TC154785	2.5	1	21	64	84	UGACAGAAGAGAGUGAGCACA	:::::.::::::::: :.:	ACUGCUCGCUCUCUUCUCUUA	Cleavage	similar to UniRef100_Q2HRW5 Cluster: Syntaxin, N-terminal; n=1; Medicago truncatula|Rep: Syntaxin, N-terminal - Medicago truncatula (Barrel medic), partial (77%)
	bpe-miR156a-5p.A	TGACAGAAGAGAGTGAGCACA	TC162499	2.5	1	21	10	30	UGACAGAAGAGAGUGAGCACA	: ::: :::::::.:::::	CUUCCUCUCUCUCUUUUGUCA	Cleavage	similar to UniRef100_Q3E7D0 Cluster: Nucleobase-ascorbate transporter 12; n=3; Arabidopsis thaliana|Rep: Nucleobase-ascorbate transporter 12 - Arabidopsis thaliana (Mouse-ear cress), partial (8%)
	bpe-miR156a-5p.A	TGACAGAAGAGAGTGAGCACA	AJ407505	3	1	21	248	267	UGACAGAAGAGAGUGAGCACA	:::::::::::::::: ::::	UGUGCUCACUCUCUUC-GUCA	Cleavage	UniRef100_A7PEL7 Cluster: Chromosome chr11 scaffold_13 whole genome shotgun sequence; n=1; Vitis vinifera|Rep:, partial (1%)
	bpe-miR156a-5p.A	TGACAGAAGAGAGTGAGCACA	TC145461	3	1	21	1021	1041	UGACAGAAGAGAGUGAGCACA	: ::::::.::::::::.:	UNNNCUCACUUUCUUCUGUUA	Cleavage	similar to UniRef100_Q6W2J5 Cluster: VDAC1.1; n=1; Lotus japonicus|Rep: VDAC1.1 - Lotus japonicus, complete
	bpe-miR156a-5p.A	TGACAGAAGAGAGTGAGCACA	TC179911	3	1	21	451	471	UGACAGAAGAGAGUGAGCACA	::::::.::::::::.:	UAGACUCACUUUCUUCUGUUA	Cleavage	similar to UniRef100_Q6W2J5 Cluster: VDAC1.1; n=1; Lotus japonicus|Rep: VDAC1.1 - Lotus japonicus, partial (37%)
	bpe-miR156a-5p.A	TGACAGAAGAGAGTGAGCACA	TC140389	3	1	21	1024	1044	UGACAGAAGAGAGUGAGCACA	::::::.::::::::.:	UAGACUCACUUUCUUCUGUUA	Cleavage	similar to UniRef100_Q6W2J5 Cluster: VDAC1.1; n=1; Lotus japonicus|Rep: VDAC1.1 - Lotus japonicus, partial (98%)
	bpe-miR156a-5p.A	TGACAGAAGAGAGTGAGCACA	TC180503	3	1	21	247	267	UGACAGAAGAGAGUGAGCACA	::.::..:.:::::::::	CCUGUUCGUUUUCUUCUGUCC	Cleavage	weakly similar to UniRef100_A4BRK1 Cluster: Probable transporter; n=1; Nitrococcus mobilis Nb-231|Rep: Probable transporter - Nitrococcus mobilis Nb-231, partial (5%)
	bpe-miR156a-5p.A	TGACAGAAGAGAGTGAGCACA	TC156083	3	1	21	18	38	UGACAGAAGAGAGUGAGCACA	:::::::.:::::: :::	AAAGCUCACUUUCUUCUUUCA	Cleavage	weakly similar to UniRef100_Q84Q77 Cluster: 17.4 kDa class I heat shock protein 3; n=3; Oryza sativa|Rep: 17.4 kDa class I heat shock protein 3 - Oryza sativa subsp. japonica (Rice), partial (42%)
	bpe-miR156a-5p.A	TGACAGAAGAGAGTGAGCACA	TC157471	3	1	21	141	161	UGACAGAAGAGAGUGAGCACA	:::::::.:::::: :::	AAAGCUCACUUUCUUCUUUCA	Cleavage
	bpe-miR156a-5p.A	TGACAGAAGAGAGTGAGCACA	TC147463	3	1	21	153	173	UGACAGAAGAGAGUGAGCACA	: ::::..::::::::: :.:	UCUGCUUGCUCUCUUCUAUUA	Cleavage	similar to UniRef100_A3IAY7 Cluster: Nitrogen fixation protein; n=1; Bacillus sp. B14905|Rep: Nitrogen fixation protein - Bacillus sp. B14905, partial (19%)
	bpe-miR156a-5p.A	TGACAGAAGAGAGTGAGCACA	TC179956	3	1	21	1292	1312	UGACAGAAGAGAGUGAGCACA	: ::::::::. :::.:::.:	UCUGCUCACUUGCUUUUGUUA	Translation	similar to UniRef100_A7NUJ3 Cluster: Chromosome chr18 scaffold_1, whole genome shotgun sequence; n=1; Vitis vinifera|Rep: Chromosome chr18 scaffold_1, whole genome shotgun sequence - Vitis vinifera (Grape), partial (49%)
	bpe-miR156a-5p.A	TGACAGAAGAGAGTGAGCACA	TC170385	3	1	21	145	165	UGACAGAAGAGAGUGAGCACA	::::..::::::::: :.:	CCUGCUUGCUCUCUUCUCUUA	Cleavage	homologue to UniRef100_A9V995 Cluster: Predicted protein; n=1; Monosiga brevicollis MX1|Rep: Predicted protein - Monosiga brevicollis MX1, partial (15%)
	bpe-miR156a-5p.A	TGACAGAAGAGAGTGAGCACA	DT469891	3	1	21	664	684	UGACAGAAGAGAGUGAGCACA	::.:.:.:.:.::::::.:	CAUGUUUAUUUUUUUCUGUUA	Cleavage	UniRef100_A7RQ83 Cluster: Predicted protein; n=1; Nematostella vectensis|Rep: Predicted protein - Nematostella vectensis (Starlet sea anemone), partial (12%)
	bpe-miR156a-5p.A	TGACAGAAGAGAGTGAGCACA	TC181170	3	1	21	1438	1458	UGACAGAAGAGAGUGAGCACA	::::..::::.:::::: :	AUUGCUUGCUCUUUUCUGUAA	Cleavage	similar to UniRef100_A7NUV0 Cluster: Chromosome chr18 scaffold_1, whole genome shotgun sequence; n=1; Vitis vinifera|Rep: Chromosome chr18 scaffold_1, whole genome shotgun sequence - Vitis vinifera (Grape), partial (90%)
	bpe-miR156a-5p.A	TGACAGAAGAGAGTGAGCACA	DB876395	3	1	21	31	51	UGACAGAAGAGAGUGAGCACA	: ::.:: ::::::::: :::	UCUGUUCUCUCUCUUCUCUCA	Cleavage	similar to UniRef100_Q5BJ88 Cluster: Wasf1 protein; n=1; Xenopus tropicalis|Rep: Wasf1 protein - Xenopus tropicalis (Western clawed frog) (Silurana tropicalis), partial (5%)
	bpe-miR156a-5p.A	TGACAGAAGAGAGTGAGCACA	TC171875	3	1	19	1	19	UGACAGAAGAGAGUGAGCA	: ::.:: :::::::::::	UACUUACACUCUUCUGUCA	Cleavage	homologue to UniRef100_A7QDX2 Cluster: Chromosome chr4 scaffold_83, whole genome shotgun sequence; n=1; Vitis vinifera|Rep: Chromosome chr4 scaffold_83, whole genome shotgun sequence - Vitis vinifera (Grape), partial (23%)
	bpe-miR156a-5p.A	TGACAGAAGAGAGTGAGCACA	DB880423	3	1	21	84	104	UGACAGAAGAGAGUGAGCACA	: : ::. .::::::::::::	UUUUCUUUUUCUCUUCUGUCA	Cleavage	similar to UniRef100_A7PEZ5 Cluster: Chromosome chr11 scaffold_13, whole genome shotgun sequence; n=1; Vitis vinifera|Rep: Chromosome chr11 scaffold_13, whole genome shotgun sequence - Vitis vinifera (Grape), partial (51%)
	bpe-miR156a-5p.A19C.C20A.C	TGACAGAAGAGAGTGAGCCAC	TC138639	2	1	21	680	700	UGACAGAAGAGAGUGAGCCAC	: :::: :::::::::::::	AUUGCUCUCUCUCUUCUGUCA	Cleavage	similar to UniRef100_A7PJ70 Cluster: Chromosome chr12 scaffold_18, whole genome shotgun sequence; n=1; Vitis vinifera|Rep: Chromosome chr12 scaffold_18, whole genome shotgun sequence - Vitis vinifera (Grape), partial (70%)
	bpe-miR156a-5p.A19C.C20A.C	TGACAGAAGAGAGTGAGCCAC	TC183201	2	1	21	904	924	UGACAGAAGAGAGUGAGCCAC	: :::: :::::::::::::	AUUGCUCUCUCUCUUCUGUCA	Cleavage	similar to UniRef100_Q52UU1 Cluster: Squamosa promoter binding-like protein; n=1; Betula platyphylla|Rep: Squamosa promoter binding-like protein - Betula platyphylla, partial (74%)
	bpe-miR156a-5p.A19C.C20A.C	TGACAGAAGAGAGTGAGCCAC	TC181875	2	1	21	979	999	UGACAGAAGAGAGUGAGCCAC	: :::: :::::::::::::	AUUGCUCUCUCUCUUCUGUCA	Cleavage	homologue to UniRef100_Q96035 Cluster: Cytochrome oxidase subunit 3; n=1; Magnolia grandiflora|Rep: Cytochrome oxidase subunit 3 - Magnolia grandiflora (Southern magnolia), partial (69%)
	bpe-miR156a-5p.A19C.C20A.C	TGACAGAAGAGAGTGAGCCAC	TC170313	2	1	21	44	64	UGACAGAAGAGAGUGAGCCAC	:::: :::::::::::::	UGUGCUCUCUCUCUUCUGUCA	Cleavage
	bpe-miR156a-5p.A19C.C20A.C	TGACAGAAGAGAGTGAGCCAC	TC159682	2	1	21	41	61	UGACAGAAGAGAGUGAGCCAC	:::: :::::::::::::	CGUGCUCUCUCUCUUCUGUCA	Cleavage	similar to UniRef100_A7PFE5 Cluster: Chromosome chr11 scaffold_14, whole genome shotgun sequence; n=1; Vitis vinifera|Rep: Chromosome chr11 scaffold_14, whole genome shotgun sequence - Vitis vinifera (Grape), partial (6%)
	bpe-miR156a-5p.A19C.C20A.C	TGACAGAAGAGAGTGAGCCAC	TC156238	2	1	21	627	647	UGACAGAAGAGAGUGAGCCAC	:::: :::::::::::::	CAUGCUCUCUCUCUUCUGUCA	Cleavage	similar to UniRef100_A7QPU0 Cluster: Chromosome chr10 scaffold_138, whole genome shotgun sequence; n=1; Vitis vinifera|Rep: Chromosome chr10 scaffold_138, whole genome shotgun sequence - Vitis vinifera (Grape), partial (69%)
	bpe-miR156a-5p.A19C.C20A.C	TGACAGAAGAGAGTGAGCCAC	TC143610	2	1	21	618	638	UGACAGAAGAGAGUGAGCCAC	:::: :::::::::::::	CAUGCUCUCUCUCUUCUGUCA	Cleavage	similar to UniRef100_P93015 Cluster: Squamosa promoter-binding-like protein 3; n=1; Arabidopsis thaliana|Rep: Squamosa promoter-binding-like protein 3 - Arabidopsis thaliana (Mouse-ear cress), partial (70%)
	bpe-miR156a-5p.A19C.C20A.C	TGACAGAAGAGAGTGAGCCAC	CN523533	2	1	21	537	557	UGACAGAAGAGAGUGAGCCAC	:::: :::::::::::::	CGUGCUCUCUCUCUUCUGUCA	Cleavage	homologue to UniRef100_A2YGR5 Cluster: Squamosa promoter-binding-like protein 12; n=1; Oryza sativa Indica Group|Rep: Squamosa promoter-binding-like protein 12 - Oryza sativa subsp. indica (Rice), partial (13%)
	bpe-miR156a-5p.A19C.C20A.C	TGACAGAAGAGAGTGAGCCAC	TC162283	2	1	21	191	211	UGACAGAAGAGAGUGAGCCAC	:::: :::::::::::::	CGUGCUCUCUCUCUUCUGUCA	Cleavage	similar to UniRef100_A7PFE5 Cluster: Chromosome chr11 scaffold_14, whole genome shotgun sequence; n=1; Vitis vinifera|Rep: Chromosome chr11 scaffold_14, whole genome shotgun sequence - Vitis vinifera (Grape), partial (6%)
	bpe-miR156a-5p.A19C.C20A.C	TGACAGAAGAGAGTGAGCCAC	TC140187	2	1	21	726	746	UGACAGAAGAGAGUGAGCCAC	:::: :::::::::::::	CAUGCUCUCUCUCUUCUGUCA	Cleavage	similar to UniRef100_Q84JE4 Cluster: Squamosa promoter binding like-protein; n=1; Betula pendula|Rep: Squamosa promoter binding like-protein - Betula verrucosa (White birch) (Betula pendula), partial (80%)
	bpe-miR156a-5p.A19C.C20A.C	TGACAGAAGAGAGTGAGCCAC	TC139619	2	1	21	120	140	UGACAGAAGAGAGUGAGCCAC	:::: :::::::::::::	UGUGCUCUCUCUCUUCUGUCA	Cleavage	similar to UniRef100_Q94JW8 Cluster: Squamosa promoter-binding-like protein 6; n=1; Arabidopsis thaliana|Rep: Squamosa promoter-binding-like protein 6 - Arabidopsis thaliana (Mouse-ear cress), partial (9%)
	bpe-miR156a-5p.A19C.C20A.C	TGACAGAAGAGAGTGAGCCAC	TC156260	2	1	21	645	665	UGACAGAAGAGAGUGAGCCAC	:::: :::::::::::::	CAUGCUCCCUCUCUUCUGUCA	Cleavage	weakly similar to UniRef100_A7QPU0 Cluster: Chromosome chr10 scaffold_138, whole genome shotgun sequence; n=1; Vitis vinifera|Rep: Chromosome chr10 scaffold_138, whole genome shotgun sequence - Vitis vinifera (Grape), partial (78%)
	bpe-miR156a-5p.A19C.C20A.C	TGACAGAAGAGAGTGAGCCAC	TC167753	2	1	21	637	657	UGACAGAAGAGAGUGAGCCAC	:::: :::::::::::::	CAUGCUCCCUCUCUUCUGUCA	Cleavage	similar to UniRef100_Q5U8L4 Cluster: SBP transcription factor; n=1; Gossypium hirsutum|Rep: SBP transcription factor - Gossypium hirsutum (Upland cotton) (Gossypium mexicanum), partial (70%)
	bpe-miR156a-5p.A19C.C20A.C	TGACAGAAGAGAGTGAGCCAC	TC140194	2	1	21	390	410	UGACAGAAGAGAGUGAGCCAC	:::: :::::::::::::	UGUGCUCUCUCUCUUCUGUCA	Cleavage	similar to UniRef100_A7PKG5 Cluster: Chromosome chr15 scaffold_19, whole genome shotgun sequence; n=1; Vitis vinifera|Rep: Chromosome chr15 scaffold_19, whole genome shotgun sequence - Vitis vinifera (Grape), partial (67%)
	bpe-miR156a-5p.A19C.C20A.C	TGACAGAAGAGAGTGAGCCAC	TC161130	2	1	21	422	442	UGACAGAAGAGAGUGAGCCAC	:::: :::::::::::::	UGUGCUCUCUCUCUUCUGUCA	Cleavage	similar to UniRef100_Q94JW8 Cluster: Squamosa promoter-binding-like protein 6; n=1; Arabidopsis thaliana|Rep: Squamosa promoter-binding-like protein 6 - Arabidopsis thaliana (Mouse-ear cress), partial (12%)
	bpe-miR156a-5p.A19C.C20A.C	TGACAGAAGAGAGTGAGCCAC	TC188289	2	1	21	480	500	UGACAGAAGAGAGUGAGCCAC	:::: :::::::::::::	CGUGCUCUCUCUCUUCUGUCA	Cleavage	similar to UniRef100_A7PFE5 Cluster: Chromosome chr11 scaffold_14, whole genome shotgun sequence; n=1; Vitis vinifera|Rep: Chromosome chr11 scaffold_14, whole genome shotgun sequence - Vitis vinifera (Grape), partial (13%)
	bpe-miR156a-5p.A19C.C20A.C	TGACAGAAGAGAGTGAGCCAC	TC179932	2	1	21	831	851	UGACAGAAGAGAGUGAGCCAC	:::: :::::::::::::	CGUGCUCUCUCUCUUCUGUCA	Cleavage	similar to UniRef100_A7QP31 Cluster: Chromosome chr1 scaffold_136, whole genome shotgun sequence; n=1; Vitis vinifera|Rep: Chromosome chr1 scaffold_136, whole genome shotgun sequence - Vitis vinifera (Grape), partial (53%)
	bpe-miR156a-5p.A19C.C20A.C	TGACAGAAGAGAGTGAGCCAC	TC155685	2	1	21	1161	1181	UGACAGAAGAGAGUGAGCCAC	:::: :::::::::::::	UGUGCUCUCUCUCUUCUGUCA	Cleavage	similar to UniRef100_Q6YZE8 Cluster: Squamosa promoter-binding-like protein 16; n=1; Oryza sativa Japonica Group|Rep: Squamosa promoter-binding-like protein 16 - Oryza sativa subsp. japonica (Rice), partial (24%)
	bpe-miR156a-5p.A19C.C20A.C	TGACAGAAGAGAGTGAGCCAC	TC150948	2	1	21	341	361	UGACAGAAGAGAGUGAGCCAC	:::: :::::::::::::	CGUGCUCUCUCUCUUCUGUCA	Cleavage	similar to UniRef100_A7PFE5 Cluster: Chromosome chr11 scaffold_14, whole genome shotgun sequence; n=1; Vitis vinifera|Rep: Chromosome chr11 scaffold_14, whole genome shotgun sequence - Vitis vinifera (Grape), partial (10%)
	bpe-miR156a-5p.A19C.C20A.C	TGACAGAAGAGAGTGAGCCAC	TC158039	2	1	21	695	715	UGACAGAAGAGAGUGAGCCAC	:::: :::::::::::::	CGUGCUCUCUCUCUUCUGUCA	Cleavage	similar to UniRef100_A7PFE5 Cluster: Chromosome chr11 scaffold_14, whole genome shotgun sequence; n=1; Vitis vinifera|Rep: Chromosome chr11 scaffold_14, whole genome shotgun sequence - Vitis vinifera (Grape), partial (49%)
	bpe-miR156a-5p.A19C.C20A.C	TGACAGAAGAGAGTGAGCCAC	TC183825	2	1	21	400	420	UGACAGAAGAGAGUGAGCCAC	:::: :::::::::::::	CGUGCUCUCUCUCUUCUGUCA	Cleavage	similar to UniRef100_A7PFE5 Cluster: Chromosome chr11 scaffold_14, whole genome shotgun sequence; n=1; Vitis vinifera|Rep: Chromosome chr11 scaffold_14, whole genome shotgun sequence - Vitis vinifera (Grape), partial (11%)
	bpe-miR156a-5p.A19C.C20A.C	TGACAGAAGAGAGTGAGCCAC	TC140316	2	1	21	1077	1097	UGACAGAAGAGAGUGAGCCAC	:::: :::::::::::::	UGUGCUCUCUCUCUUCUGUCA	Cleavage	similar to UniRef100_A7PKG5 Cluster: Chromosome chr15 scaffold_19, whole genome shotgun sequence; n=1; Vitis vinifera|Rep: Chromosome chr15 scaffold_19, whole genome shotgun sequence - Vitis vinifera (Grape), partial (72%)
	bpe-miR156a-5p.A19C.C20A.C	TGACAGAAGAGAGTGAGCCAC	TC179911	2	1	21	451	471	UGACAGAAGAGAGUGAGCCAC	: ::::::.::::::::.:	UAGACUCACUUUCUUCUGUUA	Cleavage	similar to UniRef100_Q6W2J5 Cluster: VDAC1.1; n=1; Lotus japonicus|Rep: VDAC1.1 - Lotus japonicus, partial (37%)
	bpe-miR156a-5p.A19C.C20A.C	TGACAGAAGAGAGTGAGCCAC	TC140389	2	1	21	1024	1044	UGACAGAAGAGAGUGAGCCAC	: ::::::.::::::::.:	UAGACUCACUUUCUUCUGUUA	Cleavage	similar to UniRef100_Q6W2J5 Cluster: VDAC1.1; n=1; Lotus japonicus|Rep: VDAC1.1 - Lotus japonicus, partial (98%)
	bpe-miR156a-5p.A19C.C20A.C	TGACAGAAGAGAGTGAGCCAC	TC138813	2.5	1	21	39	59	UGACAGAAGAGAGUGAGCCAC	:::::::::.:::::::	AAAGCUCACUCUUUUCUGUCC	Cleavage	UniRef100_Q7EUR6 Cluster: AT4g05320/C17L7_240; n=8; core eudicotyledons|Rep: AT4g05320/C17L7_240 - Arabidopsis thaliana (Mouse-ear cress), partial (80%)
	bpe-miR156a-5p.A19C.C20A.C	TGACAGAAGAGAGTGAGCCAC	TC146251	2.5	1	21	793	813	UGACAGAAGAGAGUGAGCCAC	: :::..::.::::::::::	UUAGCUUGCUUUCUUCUGUCA	Cleavage	similar to UniRef100_A7QQJ3 Cluster: Chromosome undetermined scaffold_143, whole genome shotgun sequence; n=1; Vitis vinifera|Rep: Chromosome undetermined scaffold_143, whole genome shotgun sequence - Vitis vinifera (Grape), partial (51%)
	bpe-miR156a-5p.A19C.C20A.C	TGACAGAAGAGAGTGAGCCAC	CV257495	3	1	21	352	372	UGACAGAAGAGAGUGAGCCAC	:::.:::.:::.:::: :::	CUGGUUCAUUCUUUUCUUUCA	Cleavage
	bpe-miR156a-5p.A19C.C20A.C	TGACAGAAGAGAGTGAGCCAC	TC159493	3	1	21	114	134	UGACAGAAGAGAGUGAGCCAC	:::::: ::.:.:::::::	UUGGCUCUCUUUUUUCUGUCU	Cleavage
	bpe-miR156a-5p.A19C.C20A.C	TGACAGAAGAGAGTGAGCCAC	TC158308	3	1	21	244	264	UGACAGAAGAGAGUGAGCCAC	:::: ::::.:: :::::::	AUGGCCCACUUUCAUCUGUCA	Cleavage	similar to UniRef100_A7QEV5 Cluster: Chromosome chr16 scaffold_86, whole genome shotgun sequence; n=1; Vitis vinifera|Rep: Chromosome chr16 scaffold_86, whole genome shotgun sequence - Vitis vinifera (Grape), partial (36%)
	bpe-miR156a-5p.A19C.C20A.C	TGACAGAAGAGAGTGAGCCAC	TC154159	3	1	21	288	308	UGACAGAAGAGAGUGAGCCAC	:::: ::::.:: :::::::	AUGGCCCACUUUCAUCUGUCA	Cleavage	similar to UniRef100_A7QEV5 Cluster: Chromosome chr16 scaffold_86, whole genome shotgun sequence; n=1; Vitis vinifera|Rep: Chromosome chr16 scaffold_86, whole genome shotgun sequence - Vitis vinifera (Grape), partial (56%)
	bpe-miR156a-5p.A19C.C20A.C	TGACAGAAGAGAGTGAGCCAC	TC145461	3	1	21	1021	1041	UGACAGAAGAGAGUGAGCCAC	::::::.::::::::.:	UNNNCUCACUUUCUUCUGUUA	Cleavage	similar to UniRef100_Q6W2J5 Cluster: VDAC1.1; n=1; Lotus japonicus|Rep: VDAC1.1 - Lotus japonicus, complete
	bpe-miR156a-5p.A19C.C20A.C	TGACAGAAGAGAGTGAGCCAC	TC158063	3	1	21	327	347	UGACAGAAGAGAGUGAGCCAC	:::: ::::.:: :::::::	AUGGCCCACUUUCAUCUGUCA	Cleavage	similar to UniRef100_A7QEV5 Cluster: Chromosome chr16 scaffold_86, whole genome shotgun sequence; n=1; Vitis vinifera|Rep: Chromosome chr16 scaffold_86, whole genome shotgun sequence - Vitis vinifera (Grape), partial (66%)
	bpe-miR156a-5p.A19C.C20A.C	TGACAGAAGAGAGTGAGCCAC	TC151559	3	1	21	250	270	UGACAGAAGAGAGUGAGCCAC	:::: ::::.:: :::::::	AUGGCCCACUUUCAUCUGUCA	Cleavage	similar to UniRef100_A7QEV5 Cluster: Chromosome chr16 scaffold_86, whole genome shotgun sequence; n=1; Vitis vinifera|Rep: Chromosome chr16 scaffold_86, whole genome shotgun sequence - Vitis vinifera (Grape), partial (98%)
	bpe-miR156a-5p.A19C.C20A.C	TGACAGAAGAGAGTGAGCCAC	TC139043	3	1	21	253	273	UGACAGAAGAGAGUGAGCCAC	:::: ::::.:: :::::::	AUGGCCCACUUUCAUCUGUCA	Cleavage	similar to UniRef100_A7QEV5 Cluster: Chromosome chr16 scaffold_86, whole genome shotgun sequence; n=1; Vitis vinifera|Rep: Chromosome chr16 scaffold_86, whole genome shotgun sequence - Vitis vinifera (Grape), complete
	bpe-miR156a-5p.A19C.C20A.C	TGACAGAAGAGAGTGAGCCAC	TC156083	3	1	21	18	38	UGACAGAAGAGAGUGAGCCAC	:::::::.:::::: :::	AAAGCUCACUUUCUUCUUUCA	Cleavage	weakly similar to UniRef100_Q84Q77 Cluster: 17.4 kDa class I heat shock protein 3; n=3; Oryza sativa|Rep: 17.4 kDa class I heat shock protein 3 - Oryza sativa subsp. japonica (Rice), partial (42%)
	bpe-miR156a-5p.A19C.C20A.C	TGACAGAAGAGAGTGAGCCAC	TC157471	3	1	21	141	161	UGACAGAAGAGAGUGAGCCAC	:::::::.:::::: :::	AAAGCUCACUUUCUUCUUUCA	Cleavage
	bpe-miR156a-5p.A19C.C20A.C	TGACAGAAGAGAGTGAGCCAC	TC168829	3	1	21	1243	1263	UGACAGAAGAGAGUGAGCCAC	: :::::.::::.::.: :::	GAGGCUCGCUCUUUUUUAUCA	Cleavage	similar to UniRef100_A7QGW9 Cluster: Chromosome chr16 scaffold_94, whole genome shotgun sequence; n=1; Vitis vinifera|Rep: Chromosome chr16 scaffold_94, whole genome shotgun sequence - Vitis vinifera (Grape), partial (49%)
	bpe-miR156a-5p.A19C.C20A.C	TGACAGAAGAGAGTGAGCCAC	TC159843	3	1	21	31	51	UGACAGAAGAGAGUGAGCCAC	:::. :::::::.:::::	GAUGCUUCCUCUCUUUUGUCA	Cleavage	similar to UniRef100_P93484 Cluster: Vacuolar-sorting receptor 1 precursor; n=1; Pisum sativum|Rep: Vacuolar-sorting receptor 1 precursor - Pisum sativum (Garden pea), partial (31%)
	bpe-miR156a-5p.A19C.C20A.C	TGACAGAAGAGAGTGAGCCAC	CX174005	3	1	21	217	237	UGACAGAAGAGAGUGAGCCAC	::: ::::.:: :::::::	AAGGCCCACUUUCAUCUGUCA	Cleavage	weakly similar to UniRef100_A7QEV5 Cluster: Chromosome chr16 scaffold_86, whole genome shotgun sequence; n=1; Vitis vinifera|Rep: Chromosome chr16 scaffold_86, whole genome shotgun sequence - Vitis vinifera (Grape), partial (32%)
	bpe-miR156a-5p.A19C.C20A.C	TGACAGAAGAGAGTGAGCCAC	DB909086	3	1	21	463	483	UGACAGAAGAGAGUGAGCCAC	::::: ::::.:::: :::	UAGGCUCCCUCUUUUCUUUCA	Cleavage	similar to UniRef100_A7STE8 Cluster: Predicted protein; n=1; Nematostella vectensis|Rep: Predicted protein - Nematostella vectensis (Starlet sea anemone), partial (15%)
	bpe-miR156a-5p.A19C.C20A.C	TGACAGAAGAGAGTGAGCCAC	DT508181	3	1	21	219	239	UGACAGAAGAGAGUGAGCCAC	::::. ::::::::: :::	AGGGCUUCCUCUCUUCUCUCA	Cleavage	weakly similar to UniRef100_A9VVF7 Cluster: AAA ATPase containing von Willebrand factor type A (VWA)-like domain; n=1; Bacillus weihenstephanensis KBAB4|Rep: AAA ATPase containing von Willebrand factor type A (VWA)-like domain - Bacillus weihenstephanensis KBAB4, partial (24%)
	bpe-miR156a-5p.A19C.C20A.C	TGACAGAAGAGAGTGAGCCAC	TC168847	3	1	21	164	184	UGACAGAAGAGAGUGAGCCAC	::::. ::::::::: :::	AGGGCUUCCUCUCUUCUCUCA	Cleavage	weakly similar to UniRef100_Q7SBH0 Cluster: Predicted protein; n=1; Neurospora crassa|Rep: Predicted protein - Neurospora crassa, partial (23%)
	bpe-miR156a-5p.A19C.C20A.C	TGACAGAAGAGAGTGAGCCAC	TC140832	3	1	21	189	209	UGACAGAAGAGAGUGAGCCAC	::::. ::::::::: :::	AGGGCUUCCUCUCUUCUCUCA	Cleavage	weakly similar to UniRef100_A9VVF7 Cluster: AAA ATPase containing von Willebrand factor type A (VWA)-like domain; n=1; Bacillus weihenstephanensis KBAB4|Rep: AAA ATPase containing von Willebrand factor type A (VWA)-like domain - Bacillus weihenstephanensis KBAB4, partial (24%)
	bpe-miR156a-5p.A19C.C20A.C	TGACAGAAGAGAGTGAGCCAC	TC139535	3	1	21	281	301	UGACAGAAGAGAGUGAGCCAC	::::. ::::::::: :::	AGGGCUUCCUCUCUUCUCUCA	Cleavage
	bpe-miR156a-5p.A19C.C20A.C	TGACAGAAGAGAGTGAGCCAC	TC138471	3	1	19	1	19	UGACAGAAGAGAGUGAGCC	: ::.:: :::::::::::	GACUUACACUCUUCUGUCA	Cleavage	similar to UniRef100_A7QDX2 Cluster: Chromosome chr4 scaffold_83, whole genome shotgun sequence; n=1; Vitis vinifera|Rep: Chromosome chr4 scaffold_83, whole genome shotgun sequence - Vitis vinifera (Grape), complete
	bpe-miR156a-5p.A19G.C20A.C	TGACAGAAGAGAGTGAGCGAC	TC138639	1.5	1	21	680	700	UGACAGAAGAGAGUGAGCGAC	:.:::: :::::::::::::	AUUGCUCUCUCUCUUCUGUCA	Cleavage	similar to UniRef100_A7PJ70 Cluster: Chromosome chr12 scaffold_18, whole genome shotgun sequence; n=1; Vitis vinifera|Rep: Chromosome chr12 scaffold_18, whole genome shotgun sequence - Vitis vinifera (Grape), partial (70%)
	bpe-miR156a-5p.A19G.C20A.C	TGACAGAAGAGAGTGAGCGAC	TC183201	1.5	1	21	904	924	UGACAGAAGAGAGUGAGCGAC	:.:::: :::::::::::::	AUUGCUCUCUCUCUUCUGUCA	Cleavage	similar to UniRef100_Q52UU1 Cluster: Squamosa promoter binding-like protein; n=1; Betula platyphylla|Rep: Squamosa promoter binding-like protein - Betula platyphylla, partial (74%)
	bpe-miR156a-5p.A19G.C20A.C	TGACAGAAGAGAGTGAGCGAC	TC181875	1.5	1	21	979	999	UGACAGAAGAGAGUGAGCGAC	:.:::: :::::::::::::	AUUGCUCUCUCUCUUCUGUCA	Cleavage	homologue to UniRef100_Q96035 Cluster: Cytochrome oxidase subunit 3; n=1; Magnolia grandiflora|Rep: Cytochrome oxidase subunit 3 - Magnolia grandiflora (Southern magnolia), partial (69%)
	bpe-miR156a-5p.A19G.C20A.C	TGACAGAAGAGAGTGAGCGAC	TC170313	1.5	1	21	44	64	UGACAGAAGAGAGUGAGCGAC	.:::: :::::::::::::	UGUGCUCUCUCUCUUCUGUCA	Cleavage
	bpe-miR156a-5p.A19G.C20A.C	TGACAGAAGAGAGTGAGCGAC	TC159682	1.5	1	21	41	61	UGACAGAAGAGAGUGAGCGAC	.:::: :::::::::::::	CGUGCUCUCUCUCUUCUGUCA	Cleavage	similar to UniRef100_A7PFE5 Cluster: Chromosome chr11 scaffold_14, whole genome shotgun sequence; n=1; Vitis vinifera|Rep: Chromosome chr11 scaffold_14, whole genome shotgun sequence - Vitis vinifera (Grape), partial (6%)
	bpe-miR156a-5p.A19G.C20A.C	TGACAGAAGAGAGTGAGCGAC	TC156238	1.5	1	21	627	647	UGACAGAAGAGAGUGAGCGAC	.:::: :::::::::::::	CAUGCUCUCUCUCUUCUGUCA	Cleavage	similar to UniRef100_A7QPU0 Cluster: Chromosome chr10 scaffold_138, whole genome shotgun sequence; n=1; Vitis vinifera|Rep: Chromosome chr10 scaffold_138, whole genome shotgun sequence - Vitis vinifera (Grape), partial (69%)
	bpe-miR156a-5p.A19G.C20A.C	TGACAGAAGAGAGTGAGCGAC	TC143610	1.5	1	21	618	638	UGACAGAAGAGAGUGAGCGAC	.:::: :::::::::::::	CAUGCUCUCUCUCUUCUGUCA	Cleavage	similar to UniRef100_P93015 Cluster: Squamosa promoter-binding-like protein 3; n=1; Arabidopsis thaliana|Rep: Squamosa promoter-binding-like protein 3 - Arabidopsis thaliana (Mouse-ear cress), partial (70%)
	bpe-miR156a-5p.A19G.C20A.C	TGACAGAAGAGAGTGAGCGAC	CN523533	1.5	1	21	537	557	UGACAGAAGAGAGUGAGCGAC	.:::: :::::::::::::	CGUGCUCUCUCUCUUCUGUCA	Cleavage	homologue to UniRef100_A2YGR5 Cluster: Squamosa promoter-binding-like protein 12; n=1; Oryza sativa Indica Group|Rep: Squamosa promoter-binding-like protein 12 - Oryza sativa subsp. indica (Rice), partial (13%)
	bpe-miR156a-5p.A19G.C20A.C	TGACAGAAGAGAGTGAGCGAC	TC162283	1.5	1	21	191	211	UGACAGAAGAGAGUGAGCGAC	.:::: :::::::::::::	CGUGCUCUCUCUCUUCUGUCA	Cleavage	similar to UniRef100_A7PFE5 Cluster: Chromosome chr11 scaffold_14, whole genome shotgun sequence; n=1; Vitis vinifera|Rep: Chromosome chr11 scaffold_14, whole genome shotgun sequence - Vitis vinifera (Grape), partial (6%)
	bpe-miR156a-5p.A19G.C20A.C	TGACAGAAGAGAGTGAGCGAC	TC140187	1.5	1	21	726	746	UGACAGAAGAGAGUGAGCGAC	.:::: :::::::::::::	CAUGCUCUCUCUCUUCUGUCA	Cleavage	similar to UniRef100_Q84JE4 Cluster: Squamosa promoter binding like-protein; n=1; Betula pendula|Rep: Squamosa promoter binding like-protein - Betula verrucosa (White birch) (Betula pendula), partial (80%)
	bpe-miR156a-5p.A19G.C20A.C	TGACAGAAGAGAGTGAGCGAC	TC139619	1.5	1	21	120	140	UGACAGAAGAGAGUGAGCGAC	.:::: :::::::::::::	UGUGCUCUCUCUCUUCUGUCA	Cleavage	similar to UniRef100_Q94JW8 Cluster: Squamosa promoter-binding-like protein 6; n=1; Arabidopsis thaliana|Rep: Squamosa promoter-binding-like protein 6 - Arabidopsis thaliana (Mouse-ear cress), partial (9%)
	bpe-miR156a-5p.A19G.C20A.C	TGACAGAAGAGAGTGAGCGAC	TC156260	1.5	1	21	645	665	UGACAGAAGAGAGUGAGCGAC	.:::: :::::::::::::	CAUGCUCCCUCUCUUCUGUCA	Cleavage	weakly similar to UniRef100_A7QPU0 Cluster: Chromosome chr10 scaffold_138, whole genome shotgun sequence; n=1; Vitis vinifera|Rep: Chromosome chr10 scaffold_138, whole genome shotgun sequence - Vitis vinifera (Grape), partial (78%)
	bpe-miR156a-5p.A19G.C20A.C	TGACAGAAGAGAGTGAGCGAC	TC167753	1.5	1	21	637	657	UGACAGAAGAGAGUGAGCGAC	.:::: :::::::::::::	CAUGCUCCCUCUCUUCUGUCA	Cleavage	similar to UniRef100_Q5U8L4 Cluster: SBP transcription factor; n=1; Gossypium hirsutum|Rep: SBP transcription factor - Gossypium hirsutum (Upland cotton) (Gossypium mexicanum), partial (70%)
	bpe-miR156a-5p.A19G.C20A.C	TGACAGAAGAGAGTGAGCGAC	TC140194	1.5	1	21	390	410	UGACAGAAGAGAGUGAGCGAC	.:::: :::::::::::::	UGUGCUCUCUCUCUUCUGUCA	Cleavage	similar to UniRef100_A7PKG5 Cluster: Chromosome chr15 scaffold_19, whole genome shotgun sequence; n=1; Vitis vinifera|Rep: Chromosome chr15 scaffold_19, whole genome shotgun sequence - Vitis vinifera (Grape), partial (67%)
	bpe-miR156a-5p.A19G.C20A.C	TGACAGAAGAGAGTGAGCGAC	TC161130	1.5	1	21	422	442	UGACAGAAGAGAGUGAGCGAC	.:::: :::::::::::::	UGUGCUCUCUCUCUUCUGUCA	Cleavage	similar to UniRef100_Q94JW8 Cluster: Squamosa promoter-binding-like protein 6; n=1; Arabidopsis thaliana|Rep: Squamosa promoter-binding-like protein 6 - Arabidopsis thaliana (Mouse-ear cress), partial (12%)
	bpe-miR156a-5p.A19G.C20A.C	TGACAGAAGAGAGTGAGCGAC	TC188289	1.5	1	21	480	500	UGACAGAAGAGAGUGAGCGAC	.:::: :::::::::::::	CGUGCUCUCUCUCUUCUGUCA	Cleavage	similar to UniRef100_A7PFE5 Cluster: Chromosome chr11 scaffold_14, whole genome shotgun sequence; n=1; Vitis vinifera|Rep: Chromosome chr11 scaffold_14, whole genome shotgun sequence - Vitis vinifera (Grape), partial (13%)
	bpe-miR156a-5p.A19G.C20A.C	TGACAGAAGAGAGTGAGCGAC	TC179932	1.5	1	21	831	851	UGACAGAAGAGAGUGAGCGAC	.:::: :::::::::::::	CGUGCUCUCUCUCUUCUGUCA	Cleavage	similar to UniRef100_A7QP31 Cluster: Chromosome chr1 scaffold_136, whole genome shotgun sequence; n=1; Vitis vinifera|Rep: Chromosome chr1 scaffold_136, whole genome shotgun sequence - Vitis vinifera (Grape), partial (53%)
	bpe-miR156a-5p.A19G.C20A.C	TGACAGAAGAGAGTGAGCGAC	TC155685	1.5	1	21	1161	1181	UGACAGAAGAGAGUGAGCGAC	.:::: :::::::::::::	UGUGCUCUCUCUCUUCUGUCA	Cleavage	similar to UniRef100_Q6YZE8 Cluster: Squamosa promoter-binding-like protein 16; n=1; Oryza sativa Japonica Group|Rep: Squamosa promoter-binding-like protein 16 - Oryza sativa subsp. japonica (Rice), partial (24%)
	bpe-miR156a-5p.A19G.C20A.C	TGACAGAAGAGAGTGAGCGAC	TC150948	1.5	1	21	341	361	UGACAGAAGAGAGUGAGCGAC	.:::: :::::::::::::	CGUGCUCUCUCUCUUCUGUCA	Cleavage	similar to UniRef100_A7PFE5 Cluster: Chromosome chr11 scaffold_14, whole genome shotgun sequence; n=1; Vitis vinifera|Rep: Chromosome chr11 scaffold_14, whole genome shotgun sequence - Vitis vinifera (Grape), partial (10%)
	bpe-miR156a-5p.A19G.C20A.C	TGACAGAAGAGAGTGAGCGAC	TC158039	1.5	1	21	695	715	UGACAGAAGAGAGUGAGCGAC	.:::: :::::::::::::	CGUGCUCUCUCUCUUCUGUCA	Cleavage	similar to UniRef100_A7PFE5 Cluster: Chromosome chr11 scaffold_14, whole genome shotgun sequence; n=1; Vitis vinifera|Rep: Chromosome chr11 scaffold_14, whole genome shotgun sequence - Vitis vinifera (Grape), partial (49%)
	bpe-miR156a-5p.A19G.C20A.C	TGACAGAAGAGAGTGAGCGAC	TC183825	1.5	1	21	400	420	UGACAGAAGAGAGUGAGCGAC	.:::: :::::::::::::	CGUGCUCUCUCUCUUCUGUCA	Cleavage	similar to UniRef100_A7PFE5 Cluster: Chromosome chr11 scaffold_14, whole genome shotgun sequence; n=1; Vitis vinifera|Rep: Chromosome chr11 scaffold_14, whole genome shotgun sequence - Vitis vinifera (Grape), partial (11%)
	bpe-miR156a-5p.A19G.C20A.C	TGACAGAAGAGAGTGAGCGAC	TC140316	1.5	1	21	1077	1097	UGACAGAAGAGAGUGAGCGAC	.:::: :::::::::::::	UGUGCUCUCUCUCUUCUGUCA	Cleavage	similar to UniRef100_A7PKG5 Cluster: Chromosome chr15 scaffold_19, whole genome shotgun sequence; n=1; Vitis vinifera|Rep: Chromosome chr15 scaffold_19, whole genome shotgun sequence - Vitis vinifera (Grape), partial (72%)
	bpe-miR156a-5p.A19G.C20A.C	TGACAGAAGAGAGTGAGCGAC	TC160004	2.5	1	21	321	341	UGACAGAAGAGAGUGAGCGAC	:::::: .:.::::::::.:	CUCGCUCCUUUUCUUCUGUUA	Cleavage	similar to UniRef100_A7PV36 Cluster: Chromosome chr4 scaffold_32, whole genome shotgun sequence; n=1; Vitis vinifera|Rep: Chromosome chr4 scaffold_32, whole genome shotgun sequence - Vitis vinifera (Grape), partial (20%)
	bpe-miR156a-5p.A19G.C20A.C	TGACAGAAGAGAGTGAGCGAC	TC141987	2.5	1	21	239	259	UGACAGAAGAGAGUGAGCGAC	:::::: .:.::::::::.:	CUCGCUCCUUUUCUUCUGUUA	Cleavage	similar to UniRef100_A7PV36 Cluster: Chromosome chr4 scaffold_32, whole genome shotgun sequence; n=1; Vitis vinifera|Rep: Chromosome chr4 scaffold_32, whole genome shotgun sequence - Vitis vinifera (Grape), partial (32%)
	bpe-miR156a-5p.A19G.C20A.C	TGACAGAAGAGAGTGAGCGAC	TC138813	2.5	1	21	39	59	UGACAGAAGAGAGUGAGCGAC	:::::::::.:::::::	AAAGCUCACUCUUUUCUGUCC	Cleavage	UniRef100_Q7EUR6 Cluster: AT4g05320/C17L7_240; n=8; core eudicotyledons|Rep: AT4g05320/C17L7_240 - Arabidopsis thaliana (Mouse-ear cress), partial (80%)
	bpe-miR156a-5p.A19G.C20A.C	TGACAGAAGAGAGTGAGCGAC	TC146251	2.5	1	21	793	813	UGACAGAAGAGAGUGAGCGAC	: :::..::.::::::::::	UUAGCUUGCUUUCUUCUGUCA	Cleavage	similar to UniRef100_A7QQJ3 Cluster: Chromosome undetermined scaffold_143, whole genome shotgun sequence; n=1; Vitis vinifera|Rep: Chromosome undetermined scaffold_143, whole genome shotgun sequence - Vitis vinifera (Grape), partial (51%)
	bpe-miR156a-5p.A19G.C20A.C	TGACAGAAGAGAGTGAGCGAC	TC159843	2.5	1	21	31	51	UGACAGAAGAGAGUGAGCGAC	: .:::. :::::::.:::::	GAUGCUUCCUCUCUUUUGUCA	Cleavage	similar to UniRef100_P93484 Cluster: Vacuolar-sorting receptor 1 precursor; n=1; Pisum sativum|Rep: Vacuolar-sorting receptor 1 precursor - Pisum sativum (Garden pea), partial (31%)
	bpe-miR156a-5p.A19G.C20A.C	TGACAGAAGAGAGTGAGCGAC	CV259250	2.5	1	21	396	416	UGACAGAAGAGAGUGAGCGAC	::. : :::::::::::::	CGCGUCCUCUCUCUUCUGUCA	Cleavage	similar to UniRef100_A7PNA2 Cluster: Chromosome chr1 scaffold_22, whole genome shotgun sequence; n=1; Vitis vinifera|Rep: Chromosome chr1 scaffold_22, whole genome shotgun sequence - Vitis vinifera (Grape), partial (30%)
	bpe-miR156a-5p.A19G.C20A.C	TGACAGAAGAGAGTGAGCGAC	AJ774637	3	1	21	271	291	UGACAGAAGAGAGUGAGCGAC	::: ::::::::.:::: :::	GUCUCUCACUCUUUUCUUUCA	Cleavage	similar to UniRef100_A7PF64 Cluster: Chromosome chr11 scaffold_13, whole genome shotgun sequence; n=1; Vitis vinifera|Rep: Chromosome chr11 scaffold_13, whole genome shotgun sequence - Vitis vinifera (Grape), partial (17%)
	bpe-miR156a-5p.A19G.C20A.C	TGACAGAAGAGAGTGAGCGAC	TC179911	3	1	21	451	471	UGACAGAAGAGAGUGAGCGAC	::::::.::::::::.:	UAGACUCACUUUCUUCUGUUA	Cleavage	similar to UniRef100_Q6W2J5 Cluster: VDAC1.1; n=1; Lotus japonicus|Rep: VDAC1.1 - Lotus japonicus, partial (37%)
	bpe-miR156a-5p.A19G.C20A.C	TGACAGAAGAGAGTGAGCGAC	TC145461	3	1	21	1021	1041	UGACAGAAGAGAGUGAGCGAC	::::::.::::::::.:	UNNNCUCACUUUCUUCUGUUA	Cleavage	similar to UniRef100_Q6W2J5 Cluster: VDAC1.1; n=1; Lotus japonicus|Rep: VDAC1.1 - Lotus japonicus, complete
	bpe-miR156a-5p.A19G.C20A.C	TGACAGAAGAGAGTGAGCGAC	TC170189	3	1	21	55	75	UGACAGAAGAGAGUGAGCGAC	:: ::::.:::::::: :::	UUCUCUCAUUCUCUUCUCUCA	Cleavage	similar to UniRef100_A7QDY3 Cluster: Chromosome chr4 scaffold_83, whole genome shotgun sequence; n=1; Vitis vinifera|Rep: Chromosome chr4 scaffold_83, whole genome shotgun sequence - Vitis vinifera (Grape), partial (49%)
	bpe-miR156a-5p.A19G.C20A.C	TGACAGAAGAGAGTGAGCGAC	TC140389	3	1	21	1024	1044	UGACAGAAGAGAGUGAGCGAC	::::::.::::::::.:	UAGACUCACUUUCUUCUGUUA	Cleavage	similar to UniRef100_Q6W2J5 Cluster: VDAC1.1; n=1; Lotus japonicus|Rep: VDAC1.1 - Lotus japonicus, partial (98%)
	bpe-miR156a-5p.A19G.C20A.C	TGACAGAAGAGAGTGAGCGAC	TC156083	3	1	21	18	38	UGACAGAAGAGAGUGAGCGAC	:::::::.:::::: :::	AAAGCUCACUUUCUUCUUUCA	Cleavage	weakly similar to UniRef100_Q84Q77 Cluster: 17.4 kDa class I heat shock protein 3; n=3; Oryza sativa|Rep: 17.4 kDa class I heat shock protein 3 - Oryza sativa subsp. japonica (Rice), partial (42%)
	bpe-miR156a-5p.A19G.C20A.C	TGACAGAAGAGAGTGAGCGAC	TC157471	3	1	21	141	161	UGACAGAAGAGAGUGAGCGAC	:::::::.:::::: :::	AAAGCUCACUUUCUUCUUUCA	Cleavage
	bpe-miR156a-5p.A19G.C20A.C	TGACAGAAGAGAGTGAGCGAC	TC154785	3	1	21	64	84	UGACAGAAGAGAGUGAGCGAC	.::::.::::::::: :.:	ACUGCUCGCUCUCUUCUCUUA	Cleavage	similar to UniRef100_Q2HRW5 Cluster: Syntaxin, N-terminal; n=1; Medicago truncatula|Rep: Syntaxin, N-terminal - Medicago truncatula (Barrel medic), partial (77%)
	bpe-miR156a-5p.A19G.C20A.C	TGACAGAAGAGAGTGAGCGAC	TC167513	3	1	21	258	278	UGACAGAAGAGAGUGAGCGAC	.::::::::::::.: :.:	UCUGCUCACUCUCUUUUUUUA	Cleavage	similar to UniRef100_Q9XGI4 Cluster: Cyclin A2; n=1; Solanum lycopersicum|Rep: Cyclin A2 - Solanum lycopersicum (Tomato) (Lycopersicon esculentum), partial (20%)
	bpe-miR156a-5p.A19G.C20A.C	TGACAGAAGAGAGTGAGCGAC	TC171439	3	1	21	144	164	UGACAGAAGAGAGUGAGCGAC	:: ::: :::::::.:::.:	CUCUCUCUCUCUCUUUUGUUA	Cleavage	similar to UniRef100_Q6R567 Cluster: Ring domain containing protein; n=1; Capsicum annuum|Rep: Ring domain containing protein - Capsicum annuum (Bell pepper), partial (10%)
	bpe-miR156a-5p.A19G.C20A.C	TGACAGAAGAGAGTGAGCGAC	TC168311	3	1	21	115	135	UGACAGAAGAGAGUGAGCGAC	:: ::: :::::::.:::.:	CUCUCUCUCUCUCUUUUGUUA	Cleavage
	bpe-miR156a-5p.A19G.C20A.C	TGACAGAAGAGAGTGAGCGAC	TC162499	3	1	21	10	30	UGACAGAAGAGAGUGAGCGAC	:. ::: :::::::.:::::	CUUCCUCUCUCUCUUUUGUCA	Cleavage	similar to UniRef100_Q3E7D0 Cluster: Nucleobase-ascorbate transporter 12; n=3; Arabidopsis thaliana|Rep: Nucleobase-ascorbate transporter 12 - Arabidopsis thaliana (Mouse-ear cress), partial (8%)
	bpe-miR156a-5p.A19G.C20A.C	TGACAGAAGAGAGTGAGCGAC	TC139504	3	1	21	106	126	UGACAGAAGAGAGUGAGCGAC	:: ::: :::::::.:::.:	CUCUCUCUCUCUCUUUUGUUA	Cleavage	similar to UniRef100_Q6R567 Cluster: Ring domain containing protein; n=1; Capsicum annuum|Rep: Ring domain containing protein - Capsicum annuum (Bell pepper), partial (60%)
	bpe-miR156a-5p.A19G.C20A.C	TGACAGAAGAGAGTGAGCGAC	DB875407	3	1	21	60	80	UGACAGAAGAGAGUGAGCGAC	: ::::::::.::::::.	ACCCCUCACUCUUUUCUGUUU	Cleavage	similar to UniRef100_A7P6S7 Cluster: Chromosome chr9 scaffold_7, whole genome shotgun sequence; n=1; Vitis vinifera|Rep: Chromosome chr9 scaffold_7, whole genome shotgun sequence - Vitis vinifera (Grape), partial (35%)
	bpe-miR156a-5p.A19G.C20A.C	TGACAGAAGAGAGTGAGCGAC	TC184891	3	1	21	60	80	UGACAGAAGAGAGUGAGCGAC	: ::::::::.::::::.	ACCCCUCACUCUUUUCUGUUU	Cleavage	similar to UniRef100_Q6RJX6 Cluster: Induced stolon tip protein NAP1Ps; n=1; Capsicum annuum|Rep: Induced stolon tip protein NAP1Ps - Capsicum annuum (Bell pepper), partial (29%)
	bpe-miR156a-5p.A19G.C20A.C	TGACAGAAGAGAGTGAGCGAC	TC157170	3	1	21	305	325	UGACAGAAGAGAGUGAGCGAC	::: ::::::.::.:::..	UGCGCACACUCUUUUUUGUUG	Cleavage
	bpe-miR156a-5p.A19T.c	TGACAGAAGAGAGTGAGCT	TC138813	1.5	1	19	41	59	UGACAGAAGAGAGUGAGCU	::::::::::.:::::::	AGCUCACUCUUUUCUGUCC	Cleavage	UniRef100_Q7EUR6 Cluster: AT4g05320/C17L7_240; n=8; core eudicotyledons|Rep: AT4g05320/C17L7_240 - Arabidopsis thaliana (Mouse-ear cress), partial (80%)
	bpe-miR156a-5p.A19T.c	TGACAGAAGAGAGTGAGCT	TC146251	1.5	1	19	795	813	UGACAGAAGAGAGUGAGCU	::::..::.::::::::::	AGCUUGCUUUCUUCUGUCA	Cleavage	similar to UniRef100_A7QQJ3 Cluster: Chromosome undetermined scaffold_143, whole genome shotgun sequence; n=1; Vitis vinifera|Rep: Chromosome undetermined scaffold_143, whole genome shotgun sequence - Vitis vinifera (Grape), partial (51%)
	bpe-miR156a-5p.A19T.c	TGACAGAAGAGAGTGAGCT	TC156083	2	1	19	20	38	UGACAGAAGAGAGUGAGCU	::::::::.:::::: :::	AGCUCACUUUCUUCUUUCA	Cleavage	weakly similar to UniRef100_Q84Q77 Cluster: 17.4 kDa class I heat shock protein 3; n=3; Oryza sativa|Rep: 17.4 kDa class I heat shock protein 3 - Oryza sativa subsp. japonica (Rice), partial (42%)
	bpe-miR156a-5p.A19T.c	TGACAGAAGAGAGTGAGCT	TC157471	2	1	19	143	161	UGACAGAAGAGAGUGAGCU	::::::::.:::::: :::	AGCUCACUUUCUUCUUUCA	Cleavage
	bpe-miR156a-5p.A19T.c	TGACAGAAGAGAGTGAGCT	TC170313	2	1	19	46	64	UGACAGAAGAGAGUGAGCU	:::: :::::::::::::	UGCUCUCUCUCUUCUGUCA	Cleavage
	bpe-miR156a-5p.A19T.c	TGACAGAAGAGAGTGAGCT	TC159682	2	1	19	43	61	UGACAGAAGAGAGUGAGCU	:::: :::::::::::::	UGCUCUCUCUCUUCUGUCA	Cleavage	similar to UniRef100_A7PFE5 Cluster: Chromosome chr11 scaffold_14, whole genome shotgun sequence; n=1; Vitis vinifera|Rep: Chromosome chr11 scaffold_14, whole genome shotgun sequence - Vitis vinifera (Grape), partial (6%)
	bpe-miR156a-5p.A19T.c	TGACAGAAGAGAGTGAGCT	TC156238	2	1	19	629	647	UGACAGAAGAGAGUGAGCU	:::: :::::::::::::	UGCUCUCUCUCUUCUGUCA	Cleavage	similar to UniRef100_A7QPU0 Cluster: Chromosome chr10 scaffold_138, whole genome shotgun sequence; n=1; Vitis vinifera|Rep: Chromosome chr10 scaffold_138, whole genome shotgun sequence - Vitis vinifera (Grape), partial (69%)
	bpe-miR156a-5p.A19T.c	TGACAGAAGAGAGTGAGCT	TC143610	2	1	19	620	638	UGACAGAAGAGAGUGAGCU	:::: :::::::::::::	UGCUCUCUCUCUUCUGUCA	Cleavage	similar to UniRef100_P93015 Cluster: Squamosa promoter-binding-like protein 3; n=1; Arabidopsis thaliana|Rep: Squamosa promoter-binding-like protein 3 - Arabidopsis thaliana (Mouse-ear cress), partial (70%)
	bpe-miR156a-5p.A19T.c	TGACAGAAGAGAGTGAGCT	CN523533	2	1	19	539	557	UGACAGAAGAGAGUGAGCU	:::: :::::::::::::	UGCUCUCUCUCUUCUGUCA	Cleavage	homologue to UniRef100_A2YGR5 Cluster: Squamosa promoter-binding-like protein 12; n=1; Oryza sativa Indica Group|Rep: Squamosa promoter-binding-like protein 12 - Oryza sativa subsp. indica (Rice), partial (13%)
	bpe-miR156a-5p.A19T.c	TGACAGAAGAGAGTGAGCT	TC162283	2	1	19	193	211	UGACAGAAGAGAGUGAGCU	:::: :::::::::::::	UGCUCUCUCUCUUCUGUCA	Cleavage	similar to UniRef100_A7PFE5 Cluster: Chromosome chr11 scaffold_14, whole genome shotgun sequence; n=1; Vitis vinifera|Rep: Chromosome chr11 scaffold_14, whole genome shotgun sequence - Vitis vinifera (Grape), partial (6%)
	bpe-miR156a-5p.A19T.c	TGACAGAAGAGAGTGAGCT	TC140187	2	1	19	728	746	UGACAGAAGAGAGUGAGCU	:::: :::::::::::::	UGCUCUCUCUCUUCUGUCA	Cleavage	similar to UniRef100_Q84JE4 Cluster: Squamosa promoter binding like-protein; n=1; Betula pendula|Rep: Squamosa promoter binding like-protein - Betula verrucosa (White birch) (Betula pendula), partial (80%)
	bpe-miR156a-5p.A19T.c	TGACAGAAGAGAGTGAGCT	TC139619	2	1	19	122	140	UGACAGAAGAGAGUGAGCU	:::: :::::::::::::	UGCUCUCUCUCUUCUGUCA	Cleavage	similar to UniRef100_Q94JW8 Cluster: Squamosa promoter-binding-like protein 6; n=1; Arabidopsis thaliana|Rep: Squamosa promoter-binding-like protein 6 - Arabidopsis thaliana (Mouse-ear cress), partial (9%)
	bpe-miR156a-5p.A19T.c	TGACAGAAGAGAGTGAGCT	TC156260	2	1	19	647	665	UGACAGAAGAGAGUGAGCU	:::: :::::::::::::	UGCUCCCUCUCUUCUGUCA	Cleavage	weakly similar to UniRef100_A7QPU0 Cluster: Chromosome chr10 scaffold_138, whole genome shotgun sequence; n=1; Vitis vinifera|Rep: Chromosome chr10 scaffold_138, whole genome shotgun sequence - Vitis vinifera (Grape), partial (78%)
	bpe-miR156a-5p.A19T.c	TGACAGAAGAGAGTGAGCT	TC167753	2	1	19	639	657	UGACAGAAGAGAGUGAGCU	:::: :::::::::::::	UGCUCCCUCUCUUCUGUCA	Cleavage	similar to UniRef100_Q5U8L4 Cluster: SBP transcription factor; n=1; Gossypium hirsutum|Rep: SBP transcription factor - Gossypium hirsutum (Upland cotton) (Gossypium mexicanum), partial (70%)
	bpe-miR156a-5p.A19T.c	TGACAGAAGAGAGTGAGCT	TC140194	2	1	19	392	410	UGACAGAAGAGAGUGAGCU	:::: :::::::::::::	UGCUCUCUCUCUUCUGUCA	Cleavage	similar to UniRef100_A7PKG5 Cluster: Chromosome chr15 scaffold_19, whole genome shotgun sequence; n=1; Vitis vinifera|Rep: Chromosome chr15 scaffold_19, whole genome shotgun sequence - Vitis vinifera (Grape), partial (67%)
	bpe-miR156a-5p.A19T.c	TGACAGAAGAGAGTGAGCT	TC138639	2	1	19	682	700	UGACAGAAGAGAGUGAGCU	:::: :::::::::::::	UGCUCUCUCUCUUCUGUCA	Cleavage	similar to UniRef100_A7PJ70 Cluster: Chromosome chr12 scaffold_18, whole genome shotgun sequence; n=1; Vitis vinifera|Rep: Chromosome chr12 scaffold_18, whole genome shotgun sequence - Vitis vinifera (Grape), partial (70%)
	bpe-miR156a-5p.A19T.c	TGACAGAAGAGAGTGAGCT	TC161130	2	1	19	424	442	UGACAGAAGAGAGUGAGCU	:::: :::::::::::::	UGCUCUCUCUCUUCUGUCA	Cleavage	similar to UniRef100_Q94JW8 Cluster: Squamosa promoter-binding-like protein 6; n=1; Arabidopsis thaliana|Rep: Squamosa promoter-binding-like protein 6 - Arabidopsis thaliana (Mouse-ear cress), partial (12%)
	bpe-miR156a-5p.A19T.c	TGACAGAAGAGAGTGAGCT	TC188289	2	1	19	482	500	UGACAGAAGAGAGUGAGCU	:::: :::::::::::::	UGCUCUCUCUCUUCUGUCA	Cleavage	similar to UniRef100_A7PFE5 Cluster: Chromosome chr11 scaffold_14, whole genome shotgun sequence; n=1; Vitis vinifera|Rep: Chromosome chr11 scaffold_14, whole genome shotgun sequence - Vitis vinifera (Grape), partial (13%)
	bpe-miR156a-5p.A19T.c	TGACAGAAGAGAGTGAGCT	TC183201	2	1	19	906	924	UGACAGAAGAGAGUGAGCU	:::: :::::::::::::	UGCUCUCUCUCUUCUGUCA	Cleavage	similar to UniRef100_Q52UU1 Cluster: Squamosa promoter binding-like protein; n=1; Betula platyphylla|Rep: Squamosa promoter binding-like protein - Betula platyphylla, partial (74%)
	bpe-miR156a-5p.A19T.c	TGACAGAAGAGAGTGAGCT	TC179932	2	1	19	833	851	UGACAGAAGAGAGUGAGCU	:::: :::::::::::::	UGCUCUCUCUCUUCUGUCA	Cleavage	similar to UniRef100_A7QP31 Cluster: Chromosome chr1 scaffold_136, whole genome shotgun sequence; n=1; Vitis vinifera|Rep: Chromosome chr1 scaffold_136, whole genome shotgun sequence - Vitis vinifera (Grape), partial (53%)
	bpe-miR156a-5p.A19T.c	TGACAGAAGAGAGTGAGCT	TC181875	2	1	19	981	999	UGACAGAAGAGAGUGAGCU	:::: :::::::::::::	UGCUCUCUCUCUUCUGUCA	Cleavage	homologue to UniRef100_Q96035 Cluster: Cytochrome oxidase subunit 3; n=1; Magnolia grandiflora|Rep: Cytochrome oxidase subunit 3 - Magnolia grandiflora (Southern magnolia), partial (69%)
	bpe-miR156a-5p.A19T.c	TGACAGAAGAGAGTGAGCT	TC155685	2	1	19	1163	1181	UGACAGAAGAGAGUGAGCU	:::: :::::::::::::	UGCUCUCUCUCUUCUGUCA	Cleavage	similar to UniRef100_Q6YZE8 Cluster: Squamosa promoter-binding-like protein 16; n=1; Oryza sativa Japonica Group|Rep: Squamosa promoter-binding-like protein 16 - Oryza sativa subsp. japonica (Rice), partial (24%)
	bpe-miR156a-5p.A19T.c	TGACAGAAGAGAGTGAGCT	TC150948	2	1	19	343	361	UGACAGAAGAGAGUGAGCU	:::: :::::::::::::	UGCUCUCUCUCUUCUGUCA	Cleavage	similar to UniRef100_A7PFE5 Cluster: Chromosome chr11 scaffold_14, whole genome shotgun sequence; n=1; Vitis vinifera|Rep: Chromosome chr11 scaffold_14, whole genome shotgun sequence - Vitis vinifera (Grape), partial (10%)
	bpe-miR156a-5p.A19T.c	TGACAGAAGAGAGTGAGCT	TC158039	2	1	19	697	715	UGACAGAAGAGAGUGAGCU	:::: :::::::::::::	UGCUCUCUCUCUUCUGUCA	Cleavage	similar to UniRef100_A7PFE5 Cluster: Chromosome chr11 scaffold_14, whole genome shotgun sequence; n=1; Vitis vinifera|Rep: Chromosome chr11 scaffold_14, whole genome shotgun sequence - Vitis vinifera (Grape), partial (49%)
	bpe-miR156a-5p.A19T.c	TGACAGAAGAGAGTGAGCT	TC183825	2	1	19	402	420	UGACAGAAGAGAGUGAGCU	:::: :::::::::::::	UGCUCUCUCUCUUCUGUCA	Cleavage	similar to UniRef100_A7PFE5 Cluster: Chromosome chr11 scaffold_14, whole genome shotgun sequence; n=1; Vitis vinifera|Rep: Chromosome chr11 scaffold_14, whole genome shotgun sequence - Vitis vinifera (Grape), partial (11%)
	bpe-miR156a-5p.A19T.c	TGACAGAAGAGAGTGAGCT	TC140316	2	1	19	1079	1097	UGACAGAAGAGAGUGAGCU	:::: :::::::::::::	UGCUCUCUCUCUUCUGUCA	Cleavage	similar to UniRef100_A7PKG5 Cluster: Chromosome chr15 scaffold_19, whole genome shotgun sequence; n=1; Vitis vinifera|Rep: Chromosome chr15 scaffold_19, whole genome shotgun sequence - Vitis vinifera (Grape), partial (72%)
	bpe-miR156a-5p.A19T.c	TGACAGAAGAGAGTGAGCT	DB908627	2.5	1	19	196	214	UGACAGAAGAGAGUGAGCU	::.::.:::::::.::::	AGUUCGCUCUCUUUUGUCU	Cleavage	similar to UniRef100_A7PV45 Cluster: Chromosome chr4 scaffold_32, whole genome shotgun sequence; n=1; Vitis vinifera|Rep: Chromosome chr4 scaffold_32, whole genome shotgun sequence - Vitis vinifera (Grape), partial (29%)
	bpe-miR156a-5p.A19T.c	TGACAGAAGAGAGTGAGCT	CA822666	2.5	1	19	229	247	UGACAGAAGAGAGUGAGCU	::::: :::::::::::.	AGCUCUCUCUCUUCUGUUC	Cleavage	homologue to UniRef100_Q4SZ33 Cluster: Chromosome 21 SCAF11857, whole genome shotgun sequence; n=1; Tetraodon nigroviridis|Rep: Chromosome 21 SCAF11857, whole genome shotgun sequence - Tetraodon nigroviridis (Green puffer), partial (26%)
	bpe-miR156a-5p.A19T.c	TGACAGAAGAGAGTGAGCT	TC179911	3	1	19	453	471	UGACAGAAGAGAGUGAGCU	::::::.::::::::.:	GACUCACUUUCUUCUGUUA	Cleavage	similar to UniRef100_Q6W2J5 Cluster: VDAC1.1; n=1; Lotus japonicus|Rep: VDAC1.1 - Lotus japonicus, partial (37%)
	bpe-miR156a-5p.A19T.c	TGACAGAAGAGAGTGAGCT	TC145461	3	1	19	1023	1041	UGACAGAAGAGAGUGAGCU	::::::.::::::::.:	NNCUCACUUUCUUCUGUUA	Cleavage	similar to UniRef100_Q6W2J5 Cluster: VDAC1.1; n=1; Lotus japonicus|Rep: VDAC1.1 - Lotus japonicus, complete
	bpe-miR156a-5p.A19T.c	TGACAGAAGAGAGTGAGCT	TC140389	3	1	19	1026	1044	UGACAGAAGAGAGUGAGCU	::::::.::::::::.:	GACUCACUUUCUUCUGUUA	Cleavage	similar to UniRef100_Q6W2J5 Cluster: VDAC1.1; n=1; Lotus japonicus|Rep: VDAC1.1 - Lotus japonicus, partial (98%)
	bpe-miR156a-5p.A19T.c	TGACAGAAGAGAGTGAGCT	CF233414	3	1	19	68	86	UGACAGAAGAGAGUGAGCU	:::::::::::::. :::	AGCUCACUCUCUUUCGUCU	Cleavage
	bpe-miR156a-5p.A19T.c	TGACAGAAGAGAGTGAGCT	TC142242	3	1	19	554	572	UGACAGAAGAGAGUGAGCU	::.::..::::::::: ::	AGUUCGUUCUCUUCUGCCA	Cleavage	homologue to UniRef100_Q39834 Cluster: Clathrin heavy chain; n=1; Glycine max|Rep: Clathrin heavy chain - Glycine max (Soybean), partial (20%)
	bpe-miR156a-5p.A19T.c	TGACAGAAGAGAGTGAGCT	CK091695	3	1	19	94	112	UGACAGAAGAGAGUGAGCU	::::. .:::::::::::	AGCUUCUUCUCUUCUGUCU	Cleavage
	bpe-miR156a-5p.A19T.c	TGACAGAAGAGAGTGAGCT	TC159843	3	1	19	33	51	UGACAGAAGAGAGUGAGCU	:::. :::::::.:::::	UGCUUCCUCUCUUUUGUCA	Cleavage	similar to UniRef100_P93484 Cluster: Vacuolar-sorting receptor 1 precursor; n=1; Pisum sativum|Rep: Vacuolar-sorting receptor 1 precursor - Pisum sativum (Garden pea), partial (31%)
	bpe-miR156a-5p.A19T.c	TGACAGAAGAGAGTGAGCT	TC159809	3	1	19	502	520	UGACAGAAGAGAGUGAGCU	: ::..::.::::.:::::	ACCUUGCUUUCUUUUGUCA	Cleavage
	bpe-miR156a-5p.A19T.c	TGACAGAAGAGAGTGAGCT	TC169082	3	1	19	511	529	UGACAGAAGAGAGUGAGCU	: ::..::.::::.:::::	ACCUUGCUUUCUUUUGUCA	Cleavage	homologue to UniRef100_Q31FP8 Cluster: Flagellar basal body-associated protein FliL; n=1; Thiomicrospira crunogena XCL-2|Rep: Flagellar basal body-associated protein FliL - Thiomicrospira crunogena (strain XCL-2), partial (6%)
	bpe-miR156a-5p.A19T.c	TGACAGAAGAGAGTGAGCT	TC147614	3	1	19	489	507	UGACAGAAGAGAGUGAGCU	: ::..::.::::.:::::	ACCUUGCUUUCUUUUGUCA	Cleavage	homologue to UniRef100_Q31FP8 Cluster: Flagellar basal body-associated protein FliL; n=1; Thiomicrospira crunogena XCL-2|Rep: Flagellar basal body-associated protein FliL - Thiomicrospira crunogena (strain XCL-2), partial (6%)
	bpe-miR156a-5p.A19T.c	TGACAGAAGAGAGTGAGCT	AJ640267	3	1	19	54	72	UGACAGAAGAGAGUGAGCU	: :::.:::: ::::::::	AUCUCGCUCUGUUCUGUCA	Cleavage	weakly similar to UniRef100_O46523 Cluster: Pregnancy-associated glycoprotein; n=1; Equus zebra|Rep: Pregnancy-associated glycoprotein - Equus zebra (Mountain zebra), partial (10%)
	bpe-miR156a-5p.A19T.c	TGACAGAAGAGAGTGAGCT	TC155372	3	1	19	698	716	UGACAGAAGAGAGUGAGCU	::. .::::::::.:::.:	AGUGUACUCUCUUUUGUUA	Cleavage	similar to UniRef100_A7QGT6 Cluster: Chromosome chr16 scaffold_94, whole genome shotgun sequence; n=1; Vitis vinifera|Rep: Chromosome chr16 scaffold_94, whole genome shotgun sequence - Vitis vinifera (Grape), partial (33%)
	bpe-miR156a-5p.A19T.c	TGACAGAAGAGAGTGAGCT	TC152593	3	1	19	241	259	UGACAGAAGAGAGUGAGCU	::::: .::::::.:::..	AGCUCCUUCUCUUUUGUUG	Cleavage	similar to UniRef100_A7Q3D7 Cluster: Chromosome chr13 scaffold_48, whole genome shotgun sequence; n=1; Vitis vinifera|Rep: Chromosome chr13 scaffold_48, whole genome shotgun sequence - Vitis vinifera (Grape), partial (74%)
	bpe-miR156a-5p.A19T.c	TGACAGAAGAGAGTGAGCT	CV229479	3	1	19	690	708	UGACAGAAGAGAGUGAGCU	:: ::.::::::::::.:	AGAGCAUUCUCUUCUGUUA	Cleavage	similar to UniRef100_Q6Y1E9 Cluster: Cysteine protease 14; n=1; Trifolium repens|Rep: Cysteine protease 14 - Trifolium repens (Creeping white clover), partial (63%)
	bpe-miR156a-5p.A19T.c	TGACAGAAGAGAGTGAGCT	TC172909	3	1	19	123	141	UGACAGAAGAGAGUGAGCU	: ::. :::::::.:::::	AUCUUUCUCUCUUUUGUCA	Cleavage	homologue to UniRef100_A7PTB5 Cluster: Chromosome chr8 scaffold_29, whole genome shotgun sequence; n=1; Vitis vinifera|Rep: Chromosome chr8 scaffold_29, whole genome shotgun sequence - Vitis vinifera (Grape), partial (24%)
	bpe-miR156a-5p.A19T.c	TGACAGAAGAGAGTGAGCT	TC178385	3	1	19	118	136	UGACAGAAGAGAGUGAGCU	: ::. :::::::.:::::	AUCUUUCUCUCUUUUGUCA	Cleavage	homologue to UniRef100_A7PTB5 Cluster: Chromosome chr8 scaffold_29, whole genome shotgun sequence; n=1; Vitis vinifera|Rep: Chromosome chr8 scaffold_29, whole genome shotgun sequence - Vitis vinifera (Grape), partial (28%)
	bpe-miR156a-5p.A19T.C20A.C	TGACAGAAGAGAGTGAGCTAC	TC146251	1.5	1	21	793	813	UGACAGAAGAGAGUGAGCUAC	:::::..::.::::::::::	UUAGCUUGCUUUCUUCUGUCA	Cleavage	similar to UniRef100_A7QQJ3 Cluster: Chromosome undetermined scaffold_143, whole genome shotgun sequence; n=1; Vitis vinifera|Rep: Chromosome undetermined scaffold_143, whole genome shotgun sequence - Vitis vinifera (Grape), partial (51%)
	bpe-miR156a-5p.A19T.C20A.C	TGACAGAAGAGAGTGAGCTAC	TC138813	1.5	1	21	39	59	UGACAGAAGAGAGUGAGCUAC	::::::::::.:::::::	AAAGCUCACUCUUUUCUGUCC	Cleavage	UniRef100_Q7EUR6 Cluster: AT4g05320/C17L7_240; n=8; core eudicotyledons|Rep: AT4g05320/C17L7_240 - Arabidopsis thaliana (Mouse-ear cress), partial (80%)
	bpe-miR156a-5p.A19T.C20A.C	TGACAGAAGAGAGTGAGCTAC	TC156083	2	1	21	18	38	UGACAGAAGAGAGUGAGCUAC	::::::::.:::::: :::	AAAGCUCACUUUCUUCUUUCA	Cleavage	weakly similar to UniRef100_Q84Q77 Cluster: 17.4 kDa class I heat shock protein 3; n=3; Oryza sativa|Rep: 17.4 kDa class I heat shock protein 3 - Oryza sativa subsp. japonica (Rice), partial (42%)
	bpe-miR156a-5p.A19T.C20A.C	TGACAGAAGAGAGTGAGCTAC	TC157471	2	1	21	141	161	UGACAGAAGAGAGUGAGCUAC	::::::::.:::::: :::	AAAGCUCACUUUCUUCUUUCA	Cleavage
	bpe-miR156a-5p.A19T.C20A.C	TGACAGAAGAGAGTGAGCTAC	TC138639	2	1	21	680	700	UGACAGAAGAGAGUGAGCUAC	: :::: :::::::::::::	AUUGCUCUCUCUCUUCUGUCA	Cleavage	similar to UniRef100_A7PJ70 Cluster: Chromosome chr12 scaffold_18, whole genome shotgun sequence; n=1; Vitis vinifera|Rep: Chromosome chr12 scaffold_18, whole genome shotgun sequence - Vitis vinifera (Grape), partial (70%)
	bpe-miR156a-5p.A19T.C20A.C	TGACAGAAGAGAGTGAGCTAC	TC183201	2	1	21	904	924	UGACAGAAGAGAGUGAGCUAC	: :::: :::::::::::::	AUUGCUCUCUCUCUUCUGUCA	Cleavage	similar to UniRef100_Q52UU1 Cluster: Squamosa promoter binding-like protein; n=1; Betula platyphylla|Rep: Squamosa promoter binding-like protein - Betula platyphylla, partial (74%)
	bpe-miR156a-5p.A19T.C20A.C	TGACAGAAGAGAGTGAGCTAC	TC181875	2	1	21	979	999	UGACAGAAGAGAGUGAGCUAC	: :::: :::::::::::::	AUUGCUCUCUCUCUUCUGUCA	Cleavage	homologue to UniRef100_Q96035 Cluster: Cytochrome oxidase subunit 3; n=1; Magnolia grandiflora|Rep: Cytochrome oxidase subunit 3 - Magnolia grandiflora (Southern magnolia), partial (69%)
	bpe-miR156a-5p.A19T.C20A.C	TGACAGAAGAGAGTGAGCTAC	TC170313	2	1	21	44	64	UGACAGAAGAGAGUGAGCUAC	:::: :::::::::::::	UGUGCUCUCUCUCUUCUGUCA	Cleavage
	bpe-miR156a-5p.A19T.C20A.C	TGACAGAAGAGAGTGAGCTAC	TC159682	2	1	21	41	61	UGACAGAAGAGAGUGAGCUAC	:::: :::::::::::::	CGUGCUCUCUCUCUUCUGUCA	Cleavage	similar to UniRef100_A7PFE5 Cluster: Chromosome chr11 scaffold_14, whole genome shotgun sequence; n=1; Vitis vinifera|Rep: Chromosome chr11 scaffold_14, whole genome shotgun sequence - Vitis vinifera (Grape), partial (6%)
	bpe-miR156a-5p.A19T.C20A.C	TGACAGAAGAGAGTGAGCTAC	TC156238	2	1	21	627	647	UGACAGAAGAGAGUGAGCUAC	:::: :::::::::::::	CAUGCUCUCUCUCUUCUGUCA	Cleavage	similar to UniRef100_A7QPU0 Cluster: Chromosome chr10 scaffold_138, whole genome shotgun sequence; n=1; Vitis vinifera|Rep: Chromosome chr10 scaffold_138, whole genome shotgun sequence - Vitis vinifera (Grape), partial (69%)
	bpe-miR156a-5p.A19T.C20A.C	TGACAGAAGAGAGTGAGCTAC	TC143610	2	1	21	618	638	UGACAGAAGAGAGUGAGCUAC	:::: :::::::::::::	CAUGCUCUCUCUCUUCUGUCA	Cleavage	similar to UniRef100_P93015 Cluster: Squamosa promoter-binding-like protein 3; n=1; Arabidopsis thaliana|Rep: Squamosa promoter-binding-like protein 3 - Arabidopsis thaliana (Mouse-ear cress), partial (70%)
	bpe-miR156a-5p.A19T.C20A.C	TGACAGAAGAGAGTGAGCTAC	CN523533	2	1	21	537	557	UGACAGAAGAGAGUGAGCUAC	:::: :::::::::::::	CGUGCUCUCUCUCUUCUGUCA	Cleavage	homologue to UniRef100_A2YGR5 Cluster: Squamosa promoter-binding-like protein 12; n=1; Oryza sativa Indica Group|Rep: Squamosa promoter-binding-like protein 12 - Oryza sativa subsp. indica (Rice), partial (13%)
	bpe-miR156a-5p.A19T.C20A.C	TGACAGAAGAGAGTGAGCTAC	TC162283	2	1	21	191	211	UGACAGAAGAGAGUGAGCUAC	:::: :::::::::::::	CGUGCUCUCUCUCUUCUGUCA	Cleavage	similar to UniRef100_A7PFE5 Cluster: Chromosome chr11 scaffold_14, whole genome shotgun sequence; n=1; Vitis vinifera|Rep: Chromosome chr11 scaffold_14, whole genome shotgun sequence - Vitis vinifera (Grape), partial (6%)
	bpe-miR156a-5p.A19T.C20A.C	TGACAGAAGAGAGTGAGCTAC	TC140187	2	1	21	726	746	UGACAGAAGAGAGUGAGCUAC	:::: :::::::::::::	CAUGCUCUCUCUCUUCUGUCA	Cleavage	similar to UniRef100_Q84JE4 Cluster: Squamosa promoter binding like-protein; n=1; Betula pendula|Rep: Squamosa promoter binding like-protein - Betula verrucosa (White birch) (Betula pendula), partial (80%)
	bpe-miR156a-5p.A19T.C20A.C	TGACAGAAGAGAGTGAGCTAC	TC139619	2	1	21	120	140	UGACAGAAGAGAGUGAGCUAC	:::: :::::::::::::	UGUGCUCUCUCUCUUCUGUCA	Cleavage	similar to UniRef100_Q94JW8 Cluster: Squamosa promoter-binding-like protein 6; n=1; Arabidopsis thaliana|Rep: Squamosa promoter-binding-like protein 6 - Arabidopsis thaliana (Mouse-ear cress), partial (9%)
	bpe-miR156a-5p.A19T.C20A.C	TGACAGAAGAGAGTGAGCTAC	TC156260	2	1	21	645	665	UGACAGAAGAGAGUGAGCUAC	:::: :::::::::::::	CAUGCUCCCUCUCUUCUGUCA	Cleavage	weakly similar to UniRef100_A7QPU0 Cluster: Chromosome chr10 scaffold_138, whole genome shotgun sequence; n=1; Vitis vinifera|Rep: Chromosome chr10 scaffold_138, whole genome shotgun sequence - Vitis vinifera (Grape), partial (78%)
	bpe-miR156a-5p.A19T.C20A.C	TGACAGAAGAGAGTGAGCTAC	TC167753	2	1	21	637	657	UGACAGAAGAGAGUGAGCUAC	:::: :::::::::::::	CAUGCUCCCUCUCUUCUGUCA	Cleavage	similar to UniRef100_Q5U8L4 Cluster: SBP transcription factor; n=1; Gossypium hirsutum|Rep: SBP transcription factor - Gossypium hirsutum (Upland cotton) (Gossypium mexicanum), partial (70%)
	bpe-miR156a-5p.A19T.C20A.C	TGACAGAAGAGAGTGAGCTAC	TC140194	2	1	21	390	410	UGACAGAAGAGAGUGAGCUAC	:::: :::::::::::::	UGUGCUCUCUCUCUUCUGUCA	Cleavage	similar to UniRef100_A7PKG5 Cluster: Chromosome chr15 scaffold_19, whole genome shotgun sequence; n=1; Vitis vinifera|Rep: Chromosome chr15 scaffold_19, whole genome shotgun sequence - Vitis vinifera (Grape), partial (67%)
	bpe-miR156a-5p.A19T.C20A.C	TGACAGAAGAGAGTGAGCTAC	TC161130	2	1	21	422	442	UGACAGAAGAGAGUGAGCUAC	:::: :::::::::::::	UGUGCUCUCUCUCUUCUGUCA	Cleavage	similar to UniRef100_Q94JW8 Cluster: Squamosa promoter-binding-like protein 6; n=1; Arabidopsis thaliana|Rep: Squamosa promoter-binding-like protein 6 - Arabidopsis thaliana (Mouse-ear cress), partial (12%)
	bpe-miR156a-5p.A19T.C20A.C	TGACAGAAGAGAGTGAGCTAC	TC188289	2	1	21	480	500	UGACAGAAGAGAGUGAGCUAC	:::: :::::::::::::	CGUGCUCUCUCUCUUCUGUCA	Cleavage	similar to UniRef100_A7PFE5 Cluster: Chromosome chr11 scaffold_14, whole genome shotgun sequence; n=1; Vitis vinifera|Rep: Chromosome chr11 scaffold_14, whole genome shotgun sequence - Vitis vinifera (Grape), partial (13%)
	bpe-miR156a-5p.A19T.C20A.C	TGACAGAAGAGAGTGAGCTAC	TC179932	2	1	21	831	851	UGACAGAAGAGAGUGAGCUAC	:::: :::::::::::::	CGUGCUCUCUCUCUUCUGUCA	Cleavage	similar to UniRef100_A7QP31 Cluster: Chromosome chr1 scaffold_136, whole genome shotgun sequence; n=1; Vitis vinifera|Rep: Chromosome chr1 scaffold_136, whole genome shotgun sequence - Vitis vinifera (Grape), partial (53%)
	bpe-miR156a-5p.A19T.C20A.C	TGACAGAAGAGAGTGAGCTAC	TC155685	2	1	21	1161	1181	UGACAGAAGAGAGUGAGCUAC	:::: :::::::::::::	UGUGCUCUCUCUCUUCUGUCA	Cleavage	similar to UniRef100_Q6YZE8 Cluster: Squamosa promoter-binding-like protein 16; n=1; Oryza sativa Japonica Group|Rep: Squamosa promoter-binding-like protein 16 - Oryza sativa subsp. japonica (Rice), partial (24%)
	bpe-miR156a-5p.A19T.C20A.C	TGACAGAAGAGAGTGAGCTAC	TC150948	2	1	21	341	361	UGACAGAAGAGAGUGAGCUAC	:::: :::::::::::::	CGUGCUCUCUCUCUUCUGUCA	Cleavage	similar to UniRef100_A7PFE5 Cluster: Chromosome chr11 scaffold_14, whole genome shotgun sequence; n=1; Vitis vinifera|Rep: Chromosome chr11 scaffold_14, whole genome shotgun sequence - Vitis vinifera (Grape), partial (10%)
	bpe-miR156a-5p.A19T.C20A.C	TGACAGAAGAGAGTGAGCTAC	TC158039	2	1	21	695	715	UGACAGAAGAGAGUGAGCUAC	:::: :::::::::::::	CGUGCUCUCUCUCUUCUGUCA	Cleavage	similar to UniRef100_A7PFE5 Cluster: Chromosome chr11 scaffold_14, whole genome shotgun sequence; n=1; Vitis vinifera|Rep: Chromosome chr11 scaffold_14, whole genome shotgun sequence - Vitis vinifera (Grape), partial (49%)
	bpe-miR156a-5p.A19T.C20A.C	TGACAGAAGAGAGTGAGCTAC	TC183825	2	1	21	400	420	UGACAGAAGAGAGUGAGCUAC	:::: :::::::::::::	CGUGCUCUCUCUCUUCUGUCA	Cleavage	similar to UniRef100_A7PFE5 Cluster: Chromosome chr11 scaffold_14, whole genome shotgun sequence; n=1; Vitis vinifera|Rep: Chromosome chr11 scaffold_14, whole genome shotgun sequence - Vitis vinifera (Grape), partial (11%)
	bpe-miR156a-5p.A19T.C20A.C	TGACAGAAGAGAGTGAGCTAC	TC140316	2	1	21	1077	1097	UGACAGAAGAGAGUGAGCUAC	:::: :::::::::::::	UGUGCUCUCUCUCUUCUGUCA	Cleavage	similar to UniRef100_A7PKG5 Cluster: Chromosome chr15 scaffold_19, whole genome shotgun sequence; n=1; Vitis vinifera|Rep: Chromosome chr15 scaffold_19, whole genome shotgun sequence - Vitis vinifera (Grape), partial (72%)
	bpe-miR156a-5p.A19T.C20A.C	TGACAGAAGAGAGTGAGCTAC	DB908627	2.5	1	21	194	214	UGACAGAAGAGAGUGAGCUAC	::.::.:::::::.::::	AAAGUUCGCUCUCUUUUGUCU	Cleavage	similar to UniRef100_A7PV45 Cluster: Chromosome chr4 scaffold_32, whole genome shotgun sequence; n=1; Vitis vinifera|Rep: Chromosome chr4 scaffold_32, whole genome shotgun sequence - Vitis vinifera (Grape), partial (29%)
	bpe-miR156a-5p.A19T.C20A.C	TGACAGAAGAGAGTGAGCTAC	CA822666	2.5	1	21	227	247	UGACAGAAGAGAGUGAGCUAC	::::: :::::::::::.	UAAGCUCUCUCUCUUCUGUUC	Cleavage	homologue to UniRef100_Q4SZ33 Cluster: Chromosome 21 SCAF11857, whole genome shotgun sequence; n=1; Tetraodon nigroviridis|Rep: Chromosome 21 SCAF11857, whole genome shotgun sequence - Tetraodon nigroviridis (Green puffer), partial (26%)
	bpe-miR156a-5p.A19T.C20A.C	TGACAGAAGAGAGTGAGCTAC	TC179911	3	1	21	450	471	UGACAGAAGAGAGUGAG-CUAC	::: ::::::.::::::::.:	CUAGACUCACUUUCUUCUGUUA	Cleavage	similar to UniRef100_Q6W2J5 Cluster: VDAC1.1; n=1; Lotus japonicus|Rep: VDAC1.1 - Lotus japonicus, partial (37%)
	bpe-miR156a-5p.A19T.C20A.C	TGACAGAAGAGAGTGAGCTAC	CK091695	3	1	21	92	112	UGACAGAAGAGAGUGAGCUAC	:::::. .:::::::::::	UUAGCUUCUUCUCUUCUGUCU	Cleavage
	bpe-miR156a-5p.A19T.C20A.C	TGACAGAAGAGAGTGAGCTAC	TC140389	3	1	21	1023	1044	UGACAGAAGAGAGUGAG-CUAC	::: ::::::.::::::::.:	CUAGACUCACUUUCUUCUGUUA	Cleavage	similar to UniRef100_Q6W2J5 Cluster: VDAC1.1; n=1; Lotus japonicus|Rep: VDAC1.1 - Lotus japonicus, partial (98%)
	bpe-miR156a-5p.A19T.C20A.C	TGACAGAAGAGAGTGAGCTAC	TC145461	3	1	21	1021	1041	UGACAGAAGAGAGUGAGCUAC	::::::.::::::::.:	UNNNCUCACUUUCUUCUGUUA	Cleavage	similar to UniRef100_Q6W2J5 Cluster: VDAC1.1; n=1; Lotus japonicus|Rep: VDAC1.1 - Lotus japonicus, complete
	bpe-miR156a-5p.A19T.C20A.C	TGACAGAAGAGAGTGAGCTAC	CF233414	3	1	21	66	86	UGACAGAAGAGAGUGAGCUAC	:::::::::::::. :::	CCAGCUCACUCUCUUUCGUCU	Cleavage
	bpe-miR156a-5p.A19T.C20A.C	TGACAGAAGAGAGTGAGCTAC	TC142242	3	1	21	552	572	UGACAGAAGAGAGUGAGCUAC	::.::..::::::::: ::	UCAGUUCGUUCUCUUCUGCCA	Cleavage	homologue to UniRef100_Q39834 Cluster: Clathrin heavy chain; n=1; Glycine max|Rep: Clathrin heavy chain - Glycine max (Soybean), partial (20%)
	bpe-miR156a-5p.A19T.C20A.C	TGACAGAAGAGAGTGAGCTAC	AJ640267	3	1	21	52	72	UGACAGAAGAGAGUGAGCUAC	: : :::.:::: ::::::::	GAAUCUCGCUCUGUUCUGUCA	Cleavage	weakly similar to UniRef100_O46523 Cluster: Pregnancy-associated glycoprotein; n=1; Equus zebra|Rep: Pregnancy-associated glycoprotein - Equus zebra (Mountain zebra), partial (10%)
	bpe-miR156a-5p.A19T.C20A.C	TGACAGAAGAGAGTGAGCTAC	TC155372	3	1	21	696	716	UGACAGAAGAGAGUGAGCUAC	: ::. .::::::::.:::.:	GAAGUGUACUCUCUUUUGUUA	Cleavage	similar to UniRef100_A7QGT6 Cluster: Chromosome chr16 scaffold_94, whole genome shotgun sequence; n=1; Vitis vinifera|Rep: Chromosome chr16 scaffold_94, whole genome shotgun sequence - Vitis vinifera (Grape), partial (33%)
	bpe-miR156a-5p.A19T.C20A.C	TGACAGAAGAGAGTGAGCTAC	TC159843	3	1	21	31	51	UGACAGAAGAGAGUGAGCUAC	:::. :::::::.:::::	GAUGCUUCCUCUCUUUUGUCA	Cleavage	similar to UniRef100_P93484 Cluster: Vacuolar-sorting receptor 1 precursor; n=1; Pisum sativum|Rep: Vacuolar-sorting receptor 1 precursor - Pisum sativum (Garden pea), partial (31%)
	bpe-miR156a-5p.A19T.C20A.C	TGACAGAAGAGAGTGAGCTAC	TC159809	3	1	21	500	520	UGACAGAAGAGAGUGAGCUAC	: ::..::.::::.:::::	UCACCUUGCUUUCUUUUGUCA	Cleavage
	bpe-miR156a-5p.A19T.C20A.C	TGACAGAAGAGAGTGAGCTAC	TC169082	3	1	21	509	529	UGACAGAAGAGAGUGAGCUAC	: ::..::.::::.:::::	UCACCUUGCUUUCUUUUGUCA	Cleavage	homologue to UniRef100_Q31FP8 Cluster: Flagellar basal body-associated protein FliL; n=1; Thiomicrospira crunogena XCL-2|Rep: Flagellar basal body-associated protein FliL - Thiomicrospira crunogena (strain XCL-2), partial (6%)
	bpe-miR156a-5p.A19T.C20A.C	TGACAGAAGAGAGTGAGCTAC	TC147614	3	1	21	487	507	UGACAGAAGAGAGUGAGCUAC	: ::..::.::::.:::::	UCACCUUGCUUUCUUUUGUCA	Cleavage	homologue to UniRef100_Q31FP8 Cluster: Flagellar basal body-associated protein FliL; n=1; Thiomicrospira crunogena XCL-2|Rep: Flagellar basal body-associated protein FliL - Thiomicrospira crunogena (strain XCL-2), partial (6%)
	bpe-miR156a-5p.A19T.C20A.C	TGACAGAAGAGAGTGAGCTAC	TC152593	3	1	21	239	259	UGACAGAAGAGAGUGAGCUAC	::::: .::::::.:::..	CAAGCUCCUUCUCUUUUGUUG	Cleavage	similar to UniRef100_A7Q3D7 Cluster: Chromosome chr13 scaffold_48, whole genome shotgun sequence; n=1; Vitis vinifera|Rep: Chromosome chr13 scaffold_48, whole genome shotgun sequence - Vitis vinifera (Grape), partial (74%)
	bpe-miR156a-5p.ACs.ac	ACTGACAGAAGAGAGTGAGC	TC138813	2	1	20	42	61	ACUGACAGAAGAGAGUGAGC	:::::::::.::::::: ::	GCUCACUCUUUUCUGUCCGU	Cleavage	UniRef100_Q7EUR6 Cluster: AT4g05320/C17L7_240; n=8; core eudicotyledons|Rep: AT4g05320/C17L7_240 - Arabidopsis thaliana (Mouse-ear cress), partial (80%)
	bpe-miR156a-5p.ACs.ac	ACTGACAGAAGAGAGTGAGC	TC139619	2	1	20	123	142	ACUGACAGAAGAGAGUGAGC	:::: ::::::::::::::	GCUCUCUCUCUUCUGUCAGC	Cleavage	similar to UniRef100_Q94JW8 Cluster: Squamosa promoter-binding-like protein 6; n=1; Arabidopsis thaliana|Rep: Squamosa promoter-binding-like protein 6 - Arabidopsis thaliana (Mouse-ear cress), partial (9%)
	bpe-miR156a-5p.ACs.ac	ACTGACAGAAGAGAGTGAGC	TC161130	2	1	20	425	444	ACUGACAGAAGAGAGUGAGC	:::: ::::::::::::::	GCUCUCUCUCUUCUGUCAGC	Cleavage	similar to UniRef100_Q94JW8 Cluster: Squamosa promoter-binding-like protein 6; n=1; Arabidopsis thaliana|Rep: Squamosa promoter-binding-like protein 6 - Arabidopsis thaliana (Mouse-ear cress), partial (12%)
	bpe-miR156a-5p.ACs.ac	ACTGACAGAAGAGAGTGAGC	TC159809	2	1	20	503	522	ACUGACAGAAGAGAGUGAGC	::..::.::::.:::::::	CCUUGCUUUCUUUUGUCAGU	Cleavage
	bpe-miR156a-5p.ACs.ac	ACTGACAGAAGAGAGTGAGC	TC169082	2	1	20	512	531	ACUGACAGAAGAGAGUGAGC	::..::.::::.:::::::	CCUUGCUUUCUUUUGUCAGU	Cleavage	homologue to UniRef100_Q31FP8 Cluster: Flagellar basal body-associated protein FliL; n=1; Thiomicrospira crunogena XCL-2|Rep: Flagellar basal body-associated protein FliL - Thiomicrospira crunogena (strain XCL-2), partial (6%)
	bpe-miR156a-5p.ACs.ac	ACTGACAGAAGAGAGTGAGC	TC147614	2	1	20	490	509	ACUGACAGAAGAGAGUGAGC	::..::.::::.:::::::	CCUUGCUUUCUUUUGUCAGU	Cleavage	homologue to UniRef100_Q31FP8 Cluster: Flagellar basal body-associated protein FliL; n=1; Thiomicrospira crunogena XCL-2|Rep: Flagellar basal body-associated protein FliL - Thiomicrospira crunogena (strain XCL-2), partial (6%)
	bpe-miR156a-5p.ACs.ac	ACTGACAGAAGAGAGTGAGC	TC143610	2.5	1	20	621	640	ACUGACAGAAGAGAGUGAGC	:::: ::::::::::::: :	GCUCUCUCUCUUCUGUCAAU	Cleavage	similar to UniRef100_P93015 Cluster: Squamosa promoter-binding-like protein 3; n=1; Arabidopsis thaliana|Rep: Squamosa promoter-binding-like protein 3 - Arabidopsis thaliana (Mouse-ear cress), partial (70%)
	bpe-miR156a-5p.ACs.ac	ACTGACAGAAGAGAGTGAGC	TC140187	2.5	1	20	729	748	ACUGACAGAAGAGAGUGAGC	:::: ::::::::::::: :	GCUCUCUCUCUUCUGUCAAU	Cleavage	similar to UniRef100_Q84JE4 Cluster: Squamosa promoter binding like-protein; n=1; Betula pendula|Rep: Squamosa promoter binding like-protein - Betula verrucosa (White birch) (Betula pendula), partial (80%)
	bpe-miR156a-5p.ACs.ac	ACTGACAGAAGAGAGTGAGC	TC178614	2.5	1	20	595	614	ACUGACAGAAGAGAGUGAGC	::::::::::::: ::::	AAUCACUCUCUUCUGACAGU	Cleavage	similar to UniRef100_A7PNY9 Cluster: Chromosome chr8 scaffold_23, whole genome shotgun sequence; n=1; Vitis vinifera|Rep: Chromosome chr8 scaffold_23, whole genome shotgun sequence - Vitis vinifera (Grape), partial (24%)
	bpe-miR156a-5p.ACs.ac	ACTGACAGAAGAGAGTGAGC	TC179911	2.5	1	20	454	473	ACUGACAGAAGAGAGUGAGC	::::::.::::::::.: :	ACUCACUUUCUUCUGUUAUU	Cleavage	similar to UniRef100_Q6W2J5 Cluster: VDAC1.1; n=1; Lotus japonicus|Rep: VDAC1.1 - Lotus japonicus, partial (37%)
	bpe-miR156a-5p.ACs.ac	ACTGACAGAAGAGAGTGAGC	TC140389	2.5	1	20	1027	1046	ACUGACAGAAGAGAGUGAGC	::::::.::::::::.: :	ACUCACUUUCUUCUGUUAUU	Cleavage	similar to UniRef100_Q6W2J5 Cluster: VDAC1.1; n=1; Lotus japonicus|Rep: VDAC1.1 - Lotus japonicus, partial (98%)
	bpe-miR156a-5p.ACs.ac	ACTGACAGAAGAGAGTGAGC	CV259250	2.5	1	20	399	418	ACUGACAGAAGAGAGUGAGC	:. : :::::::::::::::	GUCCUCUCUCUUCUGUCAGU	Cleavage	similar to UniRef100_A7PNA2 Cluster: Chromosome chr1 scaffold_22, whole genome shotgun sequence; n=1; Vitis vinifera|Rep: Chromosome chr1 scaffold_22, whole genome shotgun sequence - Vitis vinifera (Grape), partial (30%)
	bpe-miR156a-5p.ACs.ac	ACTGACAGAAGAGAGTGAGC	TC142242	3	1	20	555	574	ACUGACAGAAGAGAGUGAGC	:.::..::::::::: ::::	GUUCGUUCUCUUCUGCCAGU	Cleavage	homologue to UniRef100_Q39834 Cluster: Clathrin heavy chain; n=1; Glycine max|Rep: Clathrin heavy chain - Glycine max (Soybean), partial (20%)
	bpe-miR156a-5p.ACs.ac	ACTGACAGAAGAGAGTGAGC	TC146251	3	1	20	796	815	ACUGACAGAAGAGAGUGAGC	:::..::.:::::::::: :	GCUUGCUUUCUUCUGUCAAU	Cleavage	similar to UniRef100_A7QQJ3 Cluster: Chromosome undetermined scaffold_143, whole genome shotgun sequence; n=1; Vitis vinifera|Rep: Chromosome undetermined scaffold_143, whole genome shotgun sequence - Vitis vinifera (Grape), partial (51%)
	bpe-miR156a-5p.ACs.ac	ACTGACAGAAGAGAGTGAGC	DB909086	3	1	20	466	485	ACUGACAGAAGAGAGUGAGC	:::: ::::.:::: :::::	GCUCCCUCUUUUCUUUCAGU	Cleavage	similar to UniRef100_A7STE8 Cluster: Predicted protein; n=1; Nematostella vectensis|Rep: Predicted protein - Nematostella vectensis (Starlet sea anemone), partial (15%)
	bpe-miR156a-5p.ACs.ac	ACTGACAGAAGAGAGTGAGC	TC157445	3	1	20	39	58	ACUGACAGAAGAGAGUGAGC	:::::::.:::: :::::	AGUCACUCUUUUCUUUCAGU	Cleavage	similar to UniRef100_Q9SSE1 Cluster: MLP3.20 protein; n=1; Arabidopsis thaliana|Rep: MLP3.20 protein - Arabidopsis thaliana (Mouse-ear cress), partial (26%)
	bpe-miR156a-5p.ACs.ac	ACTGACAGAAGAGAGTGAGC	TC170189	3	1	20	58	77	ACUGACAGAAGAGAGUGAGC	::::.:::::::: ::::	UCUCAUUCUCUUCUCUCAGA	Cleavage	similar to UniRef100_A7QDY3 Cluster: Chromosome chr4 scaffold_83, whole genome shotgun sequence; n=1; Vitis vinifera|Rep: Chromosome chr4 scaffold_83, whole genome shotgun sequence - Vitis vinifera (Grape), partial (49%)
	bpe-miR156a-5p.ACs.ac	ACTGACAGAAGAGAGTGAGC	TC141754	3	1	20	40	59	ACUGACAGAAGAGAGUGAGC	:::::::.:::: :::::	AGUCACUCUUUUCUUUCAGU	Cleavage	similar to UniRef100_A7P612 Cluster: Chromosome chr4 scaffold_6, whole genome shotgun sequence; n=1; Vitis vinifera|Rep: Chromosome chr4 scaffold_6, whole genome shotgun sequence - Vitis vinifera (Grape), complete
	bpe-miR156a-5p.ACs.ac	ACTGACAGAAGAGAGTGAGC	DB910827	3	1	20	280	299	ACUGACAGAAGAGAGUGAGC	.:: :::::::::::.::	CUUCUCUCUCUUCUGUUAGG	Cleavage	similar to UniRef100_A7NZ33 Cluster: Chromosome chr6 scaffold_3, whole genome shotgun sequence; n=1; Vitis vinifera|Rep: Chromosome chr6 scaffold_3, whole genome shotgun sequence - Vitis vinifera (Grape), partial (14%)
	bpe-miR156a-5p.ACs.ac	ACTGACAGAAGAGAGTGAGC	TC176385	3	1	20	508	527	ACUGACAGAAGAGAGUGAGC	.: ::::::::::::.::	UUUAACUCUCUUCUGUUAGG	Cleavage	similar to UniRef100_A7PU50 Cluster: Chromosome chr7 scaffold_31, whole genome shotgun sequence; n=1; Vitis vinifera|Rep: Chromosome chr7 scaffold_31, whole genome shotgun sequence - Vitis vinifera (Grape), partial (6%)
	bpe-miR156a-5p.ACs.ac	ACTGACAGAAGAGAGTGAGC	TC157160	3	1	20	39	58	ACUGACAGAAGAGAGUGAGC	::: :::.:::::::.::	UAUCAAUCUUUUCUGUCGGU	Cleavage	similar to UniRef100_A7QAL1 Cluster: Chromosome undetermined scaffold_71, whole genome shotgun sequence; n=1; Vitis vinifera|Rep: Chromosome undetermined scaffold_71, whole genome shotgun sequence - Vitis vinifera (Grape), partial (49%)
	bpe-miR156a-5p.ACs.ac	ACTGACAGAAGAGAGTGAGC	TC148929	3	1	20	132	151	ACUGACAGAAGAGAGUGAGC	.::: :::::::::::.:	AUUCAAUCUCUUCUGUCGGA	Cleavage	similar to UniRef100_A7Q1P7 Cluster: Chromosome chr7 scaffold_44, whole genome shotgun sequence; n=1; Vitis vinifera|Rep: Chromosome chr7 scaffold_44, whole genome shotgun sequence - Vitis vinifera (Grape), partial (69%)
	bpe-miR156a-5p.ACs.ac	ACTGACAGAAGAGAGTGAGC	DB903027	3	1	20	131	150	ACUGACAGAAGAGAGUGAGC	::: ::::.:: :::::::	UCUCUCUCUUUUAUGUCAGU	Cleavage
	bpe-miR156a-5p.ACs.ac	ACTGACAGAAGAGAGTGAGC	TC171875	3	1	20	2	21	ACUGACAGAAGAGAGUGAGC	::.:: ::::::::::: :	ACUUACACUCUUCUGUCACU	Cleavage	homologue to UniRef100_A7QDX2 Cluster: Chromosome chr4 scaffold_83, whole genome shotgun sequence; n=1; Vitis vinifera|Rep: Chromosome chr4 scaffold_83, whole genome shotgun sequence - Vitis vinifera (Grape), partial (23%)
	bpe-miR156a-5p.ACs.ac	ACTGACAGAAGAGAGTGAGC	TC169367	3	1	20	147	166	ACUGACAGAAGAGAGUGAGC	: ::::.:::::: :::::	UCCCACUUUCUUCUCUCAGU	Cleavage	similar to UniRef100_Q9FZ45 Cluster: Uncharacterized membrane protein At1g16860; n=1; Arabidopsis thaliana|Rep: Uncharacterized membrane protein At1g16860 - Arabidopsis thaliana (Mouse-ear cress), partial (27%)
	bpe-miR156a-5p.ACs.ac	ACTGACAGAAGAGAGTGAGC	CK099169	3	1	20	749	768	ACUGACAGAAGAGAGUGAGC	::: ::.:.::.::::.::	UCUCUCUUUUUUUUGUCGGU	Cleavage	homologue to UniRef100_Q7X9I2 Cluster: MYB transcription factor R2R3 type; n=1; Populus tremula x Populus tremuloides|Rep: MYB transcription factor R2R3 type - Populus tremula x Populus tremuloides, partial (21%)
	bpe-miR156a-5p.ACs.ac	ACTGACAGAAGAGAGTGAGC	TC185150	3	1	20	120	139	ACUGACAGAAGAGAGUGAGC	::. ::.::::::::..::	UCUUUCUUUCUUCUGUUGGU	Cleavage	similar to UniRef100_Q8L8L3 Cluster: Ubiquitin carrier protein; n=1; Arabidopsis thaliana|Rep: Ubiquitin carrier protein - Arabidopsis thaliana (Mouse-ear cress), partial (91%)
	bpe-miR156a-5p.ACs.ac	ACTGACAGAAGAGAGTGAGC	TC143299	3	1	20	135	154	ACUGACAGAAGAGAGUGAGC	::. ::.::::::::..::	UCUUUCUUUCUUCUGUUGGU	Cleavage	similar to UniRef100_Q8L8L3 Cluster: Ubiquitin carrier protein; n=1; Arabidopsis thaliana|Rep: Ubiquitin carrier protein - Arabidopsis thaliana (Mouse-ear cress), partial (98%)
	bpe-miR156a-5p.ACs.ac	ACTGACAGAAGAGAGTGAGC	TC183799	3	1	20	144	163	ACUGACAGAAGAGAGUGAGC	.:. :::::::::::..::	UUUUUCUCUCUUCUGUUGGU	Cleavage	homologue to UniRef100_A7R5X3 Cluster: Chromosome undetermined scaffold_1093, whole genome shotgun sequence; n=1; Vitis vinifera|Rep: Chromosome undetermined scaffold_1093, whole genome shotgun sequence - Vitis vinifera (Grape), partial (43%)
	bpe-miR156a-5p.ACs.ac	ACTGACAGAAGAGAGTGAGC	TC138471	3	1	20	2	21	ACUGACAGAAGAGAGUGAGC	::.:: ::::::::::: :	ACUUACACUCUUCUGUCACU	Cleavage	similar to UniRef100_A7QDX2 Cluster: Chromosome chr4 scaffold_83, whole genome shotgun sequence; n=1; Vitis vinifera|Rep: Chromosome chr4 scaffold_83, whole genome shotgun sequence - Vitis vinifera (Grape), complete
	bpe-miR156a-5p.AT	TGACAGAAGAGAGTGAGCACAT	TC140194	1	1	22	389	410	UGACAGAAGAGAGUGAGCACAU	:::::::: :::::::::::::	AUGUGCUCUCUCUCUUCUGUCA	Cleavage	similar to UniRef100_A7PKG5 Cluster: Chromosome chr15 scaffold_19, whole genome shotgun sequence; n=1; Vitis vinifera|Rep: Chromosome chr15 scaffold_19, whole genome shotgun sequence - Vitis vinifera (Grape), partial (67%)
	bpe-miR156a-5p.AT	TGACAGAAGAGAGTGAGCACAT	TC140316	1	1	22	1076	1097	UGACAGAAGAGAGUGAGCACAU	:::::::: :::::::::::::	AUGUGCUCUCUCUCUUCUGUCA	Cleavage	similar to UniRef100_A7PKG5 Cluster: Chromosome chr15 scaffold_19, whole genome shotgun sequence; n=1; Vitis vinifera|Rep: Chromosome chr15 scaffold_19, whole genome shotgun sequence - Vitis vinifera (Grape), partial (72%)
	bpe-miR156a-5p.AT	TGACAGAAGAGAGTGAGCACAT	TC170313	1	1	22	43	64	UGACAGAAGAGAGUGAGCACAU	::::::: :::::::::::::	UUGUGCUCUCUCUCUUCUGUCA	Cleavage
	bpe-miR156a-5p.AT	TGACAGAAGAGAGTGAGCACAT	TC139619	1	1	22	119	140	UGACAGAAGAGAGUGAGCACAU	::::::: :::::::::::::	CUGUGCUCUCUCUCUUCUGUCA	Cleavage	similar to UniRef100_Q94JW8 Cluster: Squamosa promoter-binding-like protein 6; n=1; Arabidopsis thaliana|Rep: Squamosa promoter-binding-like protein 6 - Arabidopsis thaliana (Mouse-ear cress), partial (9%)
	bpe-miR156a-5p.AT	TGACAGAAGAGAGTGAGCACAT	TC161130	1	1	22	421	442	UGACAGAAGAGAGUGAGCACAU	::::::: :::::::::::::	CUGUGCUCUCUCUCUUCUGUCA	Cleavage	similar to UniRef100_Q94JW8 Cluster: Squamosa promoter-binding-like protein 6; n=1; Arabidopsis thaliana|Rep: Squamosa promoter-binding-like protein 6 - Arabidopsis thaliana (Mouse-ear cress), partial (12%)
	bpe-miR156a-5p.AT	TGACAGAAGAGAGTGAGCACAT	TC155685	1	1	22	1160	1181	UGACAGAAGAGAGUGAGCACAU	::::::: :::::::::::::	UUGUGCUCUCUCUCUUCUGUCA	Cleavage	similar to UniRef100_Q6YZE8 Cluster: Squamosa promoter-binding-like protein 16; n=1; Oryza sativa Japonica Group|Rep: Squamosa promoter-binding-like protein 16 - Oryza sativa subsp. japonica (Rice), partial (24%)
	bpe-miR156a-5p.AT	TGACAGAAGAGAGTGAGCACAT	TC159682	1	1	22	40	61	UGACAGAAGAGAGUGAGCACAU	:::::: :::::::::::::	UCGUGCUCUCUCUCUUCUGUCA	Cleavage	similar to UniRef100_A7PFE5 Cluster: Chromosome chr11 scaffold_14, whole genome shotgun sequence; n=1; Vitis vinifera|Rep: Chromosome chr11 scaffold_14, whole genome shotgun sequence - Vitis vinifera (Grape), partial (6%)
	bpe-miR156a-5p.AT	TGACAGAAGAGAGTGAGCACAT	CN523533	1	1	22	536	557	UGACAGAAGAGAGUGAGCACAU	:::::: :::::::::::::	UCGUGCUCUCUCUCUUCUGUCA	Cleavage	homologue to UniRef100_A2YGR5 Cluster: Squamosa promoter-binding-like protein 12; n=1; Oryza sativa Indica Group|Rep: Squamosa promoter-binding-like protein 12 - Oryza sativa subsp. indica (Rice), partial (13%)
	bpe-miR156a-5p.AT	TGACAGAAGAGAGTGAGCACAT	TC162283	1	1	22	190	211	UGACAGAAGAGAGUGAGCACAU	:::::: :::::::::::::	UCGUGCUCUCUCUCUUCUGUCA	Cleavage	similar to UniRef100_A7PFE5 Cluster: Chromosome chr11 scaffold_14, whole genome shotgun sequence; n=1; Vitis vinifera|Rep: Chromosome chr11 scaffold_14, whole genome shotgun sequence - Vitis vinifera (Grape), partial (6%)
	bpe-miR156a-5p.AT	TGACAGAAGAGAGTGAGCACAT	TC188289	1	1	22	479	500	UGACAGAAGAGAGUGAGCACAU	:::::: :::::::::::::	UCGUGCUCUCUCUCUUCUGUCA	Cleavage	similar to UniRef100_A7PFE5 Cluster: Chromosome chr11 scaffold_14, whole genome shotgun sequence; n=1; Vitis vinifera|Rep: Chromosome chr11 scaffold_14, whole genome shotgun sequence - Vitis vinifera (Grape), partial (13%)
	bpe-miR156a-5p.AT	TGACAGAAGAGAGTGAGCACAT	TC179932	1	1	22	830	851	UGACAGAAGAGAGUGAGCACAU	:::::: :::::::::::::	CCGUGCUCUCUCUCUUCUGUCA	Cleavage	similar to UniRef100_A7QP31 Cluster: Chromosome chr1 scaffold_136, whole genome shotgun sequence; n=1; Vitis vinifera|Rep: Chromosome chr1 scaffold_136, whole genome shotgun sequence - Vitis vinifera (Grape), partial (53%)
	bpe-miR156a-5p.AT	TGACAGAAGAGAGTGAGCACAT	TC150948	1	1	22	340	361	UGACAGAAGAGAGUGAGCACAU	:::::: :::::::::::::	UCGUGCUCUCUCUCUUCUGUCA	Cleavage	similar to UniRef100_A7PFE5 Cluster: Chromosome chr11 scaffold_14, whole genome shotgun sequence; n=1; Vitis vinifera|Rep: Chromosome chr11 scaffold_14, whole genome shotgun sequence - Vitis vinifera (Grape), partial (10%)
	bpe-miR156a-5p.AT	TGACAGAAGAGAGTGAGCACAT	TC158039	1	1	22	694	715	UGACAGAAGAGAGUGAGCACAU	:::::: :::::::::::::	GCGUGCUCUCUCUCUUCUGUCA	Cleavage	similar to UniRef100_A7PFE5 Cluster: Chromosome chr11 scaffold_14, whole genome shotgun sequence; n=1; Vitis vinifera|Rep: Chromosome chr11 scaffold_14, whole genome shotgun sequence - Vitis vinifera (Grape), partial (49%)
	bpe-miR156a-5p.AT	TGACAGAAGAGAGTGAGCACAT	TC183825	1	1	22	399	420	UGACAGAAGAGAGUGAGCACAU	:::::: :::::::::::::	UCGUGCUCUCUCUCUUCUGUCA	Cleavage	similar to UniRef100_A7PFE5 Cluster: Chromosome chr11 scaffold_14, whole genome shotgun sequence; n=1; Vitis vinifera|Rep: Chromosome chr11 scaffold_14, whole genome shotgun sequence - Vitis vinifera (Grape), partial (11%)
	bpe-miR156a-5p.AT	TGACAGAAGAGAGTGAGCACAT	TC156238	1	1	22	626	647	UGACAGAAGAGAGUGAGCACAU	::::: :::::::::::::	GCAUGCUCUCUCUCUUCUGUCA	Cleavage	similar to UniRef100_A7QPU0 Cluster: Chromosome chr10 scaffold_138, whole genome shotgun sequence; n=1; Vitis vinifera|Rep: Chromosome chr10 scaffold_138, whole genome shotgun sequence - Vitis vinifera (Grape), partial (69%)
	bpe-miR156a-5p.AT	TGACAGAAGAGAGTGAGCACAT	TC143610	1	1	22	617	638	UGACAGAAGAGAGUGAGCACAU	::::: :::::::::::::	GCAUGCUCUCUCUCUUCUGUCA	Cleavage	similar to UniRef100_P93015 Cluster: Squamosa promoter-binding-like protein 3; n=1; Arabidopsis thaliana|Rep: Squamosa promoter-binding-like protein 3 - Arabidopsis thaliana (Mouse-ear cress), partial (70%)
	bpe-miR156a-5p.AT	TGACAGAAGAGAGTGAGCACAT	TC140187	1	1	22	725	746	UGACAGAAGAGAGUGAGCACAU	::::: :::::::::::::	CCAUGCUCUCUCUCUUCUGUCA	Cleavage	similar to UniRef100_Q84JE4 Cluster: Squamosa promoter binding like-protein; n=1; Betula pendula|Rep: Squamosa promoter binding like-protein - Betula verrucosa (White birch) (Betula pendula), partial (80%)
	bpe-miR156a-5p.AT	TGACAGAAGAGAGTGAGCACAT	TC156260	1	1	22	644	665	UGACAGAAGAGAGUGAGCACAU	::::: :::::::::::::	GCAUGCUCCCUCUCUUCUGUCA	Cleavage	weakly similar to UniRef100_A7QPU0 Cluster: Chromosome chr10 scaffold_138, whole genome shotgun sequence; n=1; Vitis vinifera|Rep: Chromosome chr10 scaffold_138, whole genome shotgun sequence - Vitis vinifera (Grape), partial (78%)
	bpe-miR156a-5p.AT	TGACAGAAGAGAGTGAGCACAT	TC167753	1	1	22	636	657	UGACAGAAGAGAGUGAGCACAU	::::: :::::::::::::	GCAUGCUCCCUCUCUUCUGUCA	Cleavage	similar to UniRef100_Q5U8L4 Cluster: SBP transcription factor; n=1; Gossypium hirsutum|Rep: SBP transcription factor - Gossypium hirsutum (Upland cotton) (Gossypium mexicanum), partial (70%)
	bpe-miR156a-5p.AT	TGACAGAAGAGAGTGAGCACAT	TC138639	1	1	22	679	700	UGACAGAAGAGAGUGAGCACAU	::::: :::::::::::::	GAUUGCUCUCUCUCUUCUGUCA	Cleavage	similar to UniRef100_A7PJ70 Cluster: Chromosome chr12 scaffold_18, whole genome shotgun sequence; n=1; Vitis vinifera|Rep: Chromosome chr12 scaffold_18, whole genome shotgun sequence - Vitis vinifera (Grape), partial (70%)
	bpe-miR156a-5p.AT	TGACAGAAGAGAGTGAGCACAT	TC183201	1	1	22	903	924	UGACAGAAGAGAGUGAGCACAU	::::: :::::::::::::	GAUUGCUCUCUCUCUUCUGUCA	Cleavage	similar to UniRef100_Q52UU1 Cluster: Squamosa promoter binding-like protein; n=1; Betula platyphylla|Rep: Squamosa promoter binding-like protein - Betula platyphylla, partial (74%)
	bpe-miR156a-5p.AT	TGACAGAAGAGAGTGAGCACAT	TC181875	1	1	22	978	999	UGACAGAAGAGAGUGAGCACAU	::::: :::::::::::::	GAUUGCUCUCUCUCUUCUGUCA	Cleavage	homologue to UniRef100_Q96035 Cluster: Cytochrome oxidase subunit 3; n=1; Magnolia grandiflora|Rep: Cytochrome oxidase subunit 3 - Magnolia grandiflora (Southern magnolia), partial (69%)
	bpe-miR156a-5p.AT	TGACAGAAGAGAGTGAGCACAT	TC146251	2.5	1	22	792	813	UGACAGAAGAGAGUGAGCACAU	:: :::..::.::::::::::	AUUAGCUUGCUUUCUUCUGUCA	Cleavage	similar to UniRef100_A7QQJ3 Cluster: Chromosome undetermined scaffold_143, whole genome shotgun sequence; n=1; Vitis vinifera|Rep: Chromosome undetermined scaffold_143, whole genome shotgun sequence - Vitis vinifera (Grape), partial (51%)
	bpe-miR156a-5p.AT	TGACAGAAGAGAGTGAGCACAT	TC138813	2.5	1	22	38	59	UGACAGAAGAGAGUGAGCACAU	:::::::::.:::::::	UAAAGCUCACUCUUUUCUGUCC	Cleavage	UniRef100_Q7EUR6 Cluster: AT4g05320/C17L7_240; n=8; core eudicotyledons|Rep: AT4g05320/C17L7_240 - Arabidopsis thaliana (Mouse-ear cress), partial (80%)
	bpe-miR156a-5p.AT	TGACAGAAGAGAGTGAGCACAT	TC167513	2.5	1	22	257	278	UGACAGAAGAGAGUGAGCACAU	: :::::::::::::.: :.:	UUCUGCUCACUCUCUUUUUUUA	Cleavage	similar to UniRef100_Q9XGI4 Cluster: Cyclin A2; n=1; Solanum lycopersicum|Rep: Cyclin A2 - Solanum lycopersicum (Tomato) (Lycopersicon esculentum), partial (20%)
	bpe-miR156a-5p.AT	TGACAGAAGAGAGTGAGCACAT	TC154785	2.5	1	22	63	84	UGACAGAAGAGAGUGAGCACAU	:::::.::::::::: :.:	CACUGCUCGCUCUCUUCUCUUA	Cleavage	similar to UniRef100_Q2HRW5 Cluster: Syntaxin, N-terminal; n=1; Medicago truncatula|Rep: Syntaxin, N-terminal - Medicago truncatula (Barrel medic), partial (77%)
	bpe-miR156a-5p.AT	TGACAGAAGAGAGTGAGCACAT	TC162499	2.5	1	22	9	30	UGACAGAAGAGAGUGAGCACAU	: ::: :::::::.:::::	UCUUCCUCUCUCUCUUUUGUCA	Cleavage	similar to UniRef100_Q3E7D0 Cluster: Nucleobase-ascorbate transporter 12; n=3; Arabidopsis thaliana|Rep: Nucleobase-ascorbate transporter 12 - Arabidopsis thaliana (Mouse-ear cress), partial (8%)
	bpe-miR156a-5p.AT	TGACAGAAGAGAGTGAGCACAT	AJ407505	3	1	22	247	267	UGACAGAAGAGAGUGAGCACAU	:::::::::::::::: ::::	CUGUGCUCACUCUCUUC-GUCA	Cleavage	UniRef100_A7PEL7 Cluster: Chromosome chr11 scaffold_13 whole genome shotgun sequence; n=1; Vitis vinifera|Rep:, partial (1%)
	bpe-miR156a-5p.AT	TGACAGAAGAGAGTGAGCACAT	TC145461	3	1	22	1020	1041	UGACAGAAGAGAGUGAGCACAU	: ::::::.::::::::.:	CUNNNCUCACUUUCUUCUGUUA	Cleavage	similar to UniRef100_Q6W2J5 Cluster: VDAC1.1; n=1; Lotus japonicus|Rep: VDAC1.1 - Lotus japonicus, complete
	bpe-miR156a-5p.AT	TGACAGAAGAGAGTGAGCACAT	TC179911	3	1	22	450	471	UGACAGAAGAGAGUGAGCACAU	::::::.::::::::.:	CUAGACUCACUUUCUUCUGUUA	Cleavage	similar to UniRef100_Q6W2J5 Cluster: VDAC1.1; n=1; Lotus japonicus|Rep: VDAC1.1 - Lotus japonicus, partial (37%)
	bpe-miR156a-5p.AT	TGACAGAAGAGAGTGAGCACAT	TC140389	3	1	22	1023	1044	UGACAGAAGAGAGUGAGCACAU	::::::.::::::::.:	CUAGACUCACUUUCUUCUGUUA	Cleavage	similar to UniRef100_Q6W2J5 Cluster: VDAC1.1; n=1; Lotus japonicus|Rep: VDAC1.1 - Lotus japonicus, partial (98%)
	bpe-miR156a-5p.AT	TGACAGAAGAGAGTGAGCACAT	TC180503	3	1	22	246	267	UGACAGAAGAGAGUGAGCACAU	::.::..:.:::::::::	UCCUGUUCGUUUUCUUCUGUCC	Cleavage	weakly similar to UniRef100_A4BRK1 Cluster: Probable transporter; n=1; Nitrococcus mobilis Nb-231|Rep: Probable transporter - Nitrococcus mobilis Nb-231, partial (5%)
	bpe-miR156a-5p.AT	TGACAGAAGAGAGTGAGCACAT	TC156083	3	1	22	17	38	UGACAGAAGAGAGUGAGCACAU	:::::::.:::::: :::	CAAAGCUCACUUUCUUCUUUCA	Cleavage	weakly similar to UniRef100_Q84Q77 Cluster: 17.4 kDa class I heat shock protein 3; n=3; Oryza sativa|Rep: 17.4 kDa class I heat shock protein 3 - Oryza sativa subsp. japonica (Rice), partial (42%)
	bpe-miR156a-5p.AT	TGACAGAAGAGAGTGAGCACAT	TC157471	3	1	22	140	161	UGACAGAAGAGAGUGAGCACAU	:::::::.:::::: :::	CAAAGCUCACUUUCUUCUUUCA	Cleavage
	bpe-miR156a-5p.AT	TGACAGAAGAGAGTGAGCACAT	TC147463	3	1	22	152	173	UGACAGAAGAGAGUGAGCACAU	: ::::..::::::::: :.:	UUCUGCUUGCUCUCUUCUAUUA	Cleavage	similar to UniRef100_A3IAY7 Cluster: Nitrogen fixation protein; n=1; Bacillus sp. B14905|Rep: Nitrogen fixation protein - Bacillus sp. B14905, partial (19%)
	bpe-miR156a-5p.AT	TGACAGAAGAGAGTGAGCACAT	TC179956	3	1	22	1291	1312	UGACAGAAGAGAGUGAGCACAU	: ::::::::. :::.:::.:	UUCUGCUCACUUGCUUUUGUUA	Translation	similar to UniRef100_A7NUJ3 Cluster: Chromosome chr18 scaffold_1, whole genome shotgun sequence; n=1; Vitis vinifera|Rep: Chromosome chr18 scaffold_1, whole genome shotgun sequence - Vitis vinifera (Grape), partial (49%)
	bpe-miR156a-5p.AT	TGACAGAAGAGAGTGAGCACAT	DB876395	3	1	22	30	51	UGACAGAAGAGAGUGAGCACAU	.: ::.:: ::::::::: :::	GUCUGUUCUCUCUCUUCUCUCA	Cleavage	similar to UniRef100_Q5BJ88 Cluster: Wasf1 protein; n=1; Xenopus tropicalis|Rep: Wasf1 protein - Xenopus tropicalis (Western clawed frog) (Silurana tropicalis), partial (5%)
	bpe-miR156a-5p.AT	TGACAGAAGAGAGTGAGCACAT	TC170385	3	1	22	144	165	UGACAGAAGAGAGUGAGCACAU	::::..::::::::: :.:	UCCUGCUUGCUCUCUUCUCUUA	Cleavage	homologue to UniRef100_A9V995 Cluster: Predicted protein; n=1; Monosiga brevicollis MX1|Rep: Predicted protein - Monosiga brevicollis MX1, partial (15%)
	bpe-miR156a-5p.AT	TGACAGAAGAGAGTGAGCACAT	DT469891	3	1	22	663	684	UGACAGAAGAGAGUGAGCACAU	::.:.:.:.:.::::::.:	GCAUGUUUAUUUUUUUCUGUUA	Cleavage	UniRef100_A7RQ83 Cluster: Predicted protein; n=1; Nematostella vectensis|Rep: Predicted protein - Nematostella vectensis (Starlet sea anemone), partial (12%)
	bpe-miR156a-5p.AT	TGACAGAAGAGAGTGAGCACAT	TC181170	3	1	22	1437	1458	UGACAGAAGAGAGUGAGCACAU	::::..::::.:::::: :	GAUUGCUUGCUCUUUUCUGUAA	Cleavage	similar to UniRef100_A7NUV0 Cluster: Chromosome chr18 scaffold_1, whole genome shotgun sequence; n=1; Vitis vinifera|Rep: Chromosome chr18 scaffold_1, whole genome shotgun sequence - Vitis vinifera (Grape), partial (90%)
	bpe-miR156a-5p.AT	TGACAGAAGAGAGTGAGCACAT	TC171875	3	1	19	1	19	UGACAGAAGAGAGUGAGCA	: ::.:: :::::::::::	UACUUACACUCUUCUGUCA	Cleavage	homologue to UniRef100_A7QDX2 Cluster: Chromosome chr4 scaffold_83, whole genome shotgun sequence; n=1; Vitis vinifera|Rep: Chromosome chr4 scaffold_83, whole genome shotgun sequence - Vitis vinifera (Grape), partial (23%)
	bpe-miR156a-5p.C	TGACAGAAGAGAGTGAGCACC	TC170313	1	1	21	44	64	UGACAGAAGAGAGUGAGCACC	:::::: :::::::::::::	UGUGCUCUCUCUCUUCUGUCA	Cleavage
	bpe-miR156a-5p.C	TGACAGAAGAGAGTGAGCACC	TC159682	1	1	21	41	61	UGACAGAAGAGAGUGAGCACC	:::::: :::::::::::::	CGUGCUCUCUCUCUUCUGUCA	Cleavage	similar to UniRef100_A7PFE5 Cluster: Chromosome chr11 scaffold_14, whole genome shotgun sequence; n=1; Vitis vinifera|Rep: Chromosome chr11 scaffold_14, whole genome shotgun sequence - Vitis vinifera (Grape), partial (6%)
	bpe-miR156a-5p.C	TGACAGAAGAGAGTGAGCACC	CN523533	1	1	21	537	557	UGACAGAAGAGAGUGAGCACC	:::::: :::::::::::::	CGUGCUCUCUCUCUUCUGUCA	Cleavage	homologue to UniRef100_A2YGR5 Cluster: Squamosa promoter-binding-like protein 12; n=1; Oryza sativa Indica Group|Rep: Squamosa promoter-binding-like protein 12 - Oryza sativa subsp. indica (Rice), partial (13%)
	bpe-miR156a-5p.C	TGACAGAAGAGAGTGAGCACC	TC162283	1	1	21	191	211	UGACAGAAGAGAGUGAGCACC	:::::: :::::::::::::	CGUGCUCUCUCUCUUCUGUCA	Cleavage	similar to UniRef100_A7PFE5 Cluster: Chromosome chr11 scaffold_14, whole genome shotgun sequence; n=1; Vitis vinifera|Rep: Chromosome chr11 scaffold_14, whole genome shotgun sequence - Vitis vinifera (Grape), partial (6%)
	bpe-miR156a-5p.C	TGACAGAAGAGAGTGAGCACC	TC139619	1	1	21	120	140	UGACAGAAGAGAGUGAGCACC	:::::: :::::::::::::	UGUGCUCUCUCUCUUCUGUCA	Cleavage	similar to UniRef100_Q94JW8 Cluster: Squamosa promoter-binding-like protein 6; n=1; Arabidopsis thaliana|Rep: Squamosa promoter-binding-like protein 6 - Arabidopsis thaliana (Mouse-ear cress), partial (9%)
	bpe-miR156a-5p.C	TGACAGAAGAGAGTGAGCACC	TC140194	1	1	21	390	410	UGACAGAAGAGAGUGAGCACC	:::::: :::::::::::::	UGUGCUCUCUCUCUUCUGUCA	Cleavage	similar to UniRef100_A7PKG5 Cluster: Chromosome chr15 scaffold_19, whole genome shotgun sequence; n=1; Vitis vinifera|Rep: Chromosome chr15 scaffold_19, whole genome shotgun sequence - Vitis vinifera (Grape), partial (67%)
	bpe-miR156a-5p.C	TGACAGAAGAGAGTGAGCACC	TC161130	1	1	21	422	442	UGACAGAAGAGAGUGAGCACC	:::::: :::::::::::::	UGUGCUCUCUCUCUUCUGUCA	Cleavage	similar to UniRef100_Q94JW8 Cluster: Squamosa promoter-binding-like protein 6; n=1; Arabidopsis thaliana|Rep: Squamosa promoter-binding-like protein 6 - Arabidopsis thaliana (Mouse-ear cress), partial (12%)
	bpe-miR156a-5p.C	TGACAGAAGAGAGTGAGCACC	TC188289	1	1	21	480	500	UGACAGAAGAGAGUGAGCACC	:::::: :::::::::::::	CGUGCUCUCUCUCUUCUGUCA	Cleavage	similar to UniRef100_A7PFE5 Cluster: Chromosome chr11 scaffold_14, whole genome shotgun sequence; n=1; Vitis vinifera|Rep: Chromosome chr11 scaffold_14, whole genome shotgun sequence - Vitis vinifera (Grape), partial (13%)
	bpe-miR156a-5p.C	TGACAGAAGAGAGTGAGCACC	TC179932	1	1	21	831	851	UGACAGAAGAGAGUGAGCACC	:::::: :::::::::::::	CGUGCUCUCUCUCUUCUGUCA	Cleavage	similar to UniRef100_A7QP31 Cluster: Chromosome chr1 scaffold_136, whole genome shotgun sequence; n=1; Vitis vinifera|Rep: Chromosome chr1 scaffold_136, whole genome shotgun sequence - Vitis vinifera (Grape), partial (53%)
	bpe-miR156a-5p.C	TGACAGAAGAGAGTGAGCACC	TC155685	1	1	21	1161	1181	UGACAGAAGAGAGUGAGCACC	:::::: :::::::::::::	UGUGCUCUCUCUCUUCUGUCA	Cleavage	similar to UniRef100_Q6YZE8 Cluster: Squamosa promoter-binding-like protein 16; n=1; Oryza sativa Japonica Group|Rep: Squamosa promoter-binding-like protein 16 - Oryza sativa subsp. japonica (Rice), partial (24%)
	bpe-miR156a-5p.C	TGACAGAAGAGAGTGAGCACC	TC150948	1	1	21	341	361	UGACAGAAGAGAGUGAGCACC	:::::: :::::::::::::	CGUGCUCUCUCUCUUCUGUCA	Cleavage	similar to UniRef100_A7PFE5 Cluster: Chromosome chr11 scaffold_14, whole genome shotgun sequence; n=1; Vitis vinifera|Rep: Chromosome chr11 scaffold_14, whole genome shotgun sequence - Vitis vinifera (Grape), partial (10%)
	bpe-miR156a-5p.C	TGACAGAAGAGAGTGAGCACC	TC158039	1	1	21	695	715	UGACAGAAGAGAGUGAGCACC	:::::: :::::::::::::	CGUGCUCUCUCUCUUCUGUCA	Cleavage	similar to UniRef100_A7PFE5 Cluster: Chromosome chr11 scaffold_14, whole genome shotgun sequence; n=1; Vitis vinifera|Rep: Chromosome chr11 scaffold_14, whole genome shotgun sequence - Vitis vinifera (Grape), partial (49%)
	bpe-miR156a-5p.C	TGACAGAAGAGAGTGAGCACC	TC183825	1	1	21	400	420	UGACAGAAGAGAGUGAGCACC	:::::: :::::::::::::	CGUGCUCUCUCUCUUCUGUCA	Cleavage	similar to UniRef100_A7PFE5 Cluster: Chromosome chr11 scaffold_14, whole genome shotgun sequence; n=1; Vitis vinifera|Rep: Chromosome chr11 scaffold_14, whole genome shotgun sequence - Vitis vinifera (Grape), partial (11%)
	bpe-miR156a-5p.C	TGACAGAAGAGAGTGAGCACC	TC140316	1	1	21	1077	1097	UGACAGAAGAGAGUGAGCACC	:::::: :::::::::::::	UGUGCUCUCUCUCUUCUGUCA	Cleavage	similar to UniRef100_A7PKG5 Cluster: Chromosome chr15 scaffold_19, whole genome shotgun sequence; n=1; Vitis vinifera|Rep: Chromosome chr15 scaffold_19, whole genome shotgun sequence - Vitis vinifera (Grape), partial (72%)
	bpe-miR156a-5p.C	TGACAGAAGAGAGTGAGCACC	TC156238	1	1	21	627	647	UGACAGAAGAGAGUGAGCACC	::::: :::::::::::::	CAUGCUCUCUCUCUUCUGUCA	Cleavage	similar to UniRef100_A7QPU0 Cluster: Chromosome chr10 scaffold_138, whole genome shotgun sequence; n=1; Vitis vinifera|Rep: Chromosome chr10 scaffold_138, whole genome shotgun sequence - Vitis vinifera (Grape), partial (69%)
	bpe-miR156a-5p.C	TGACAGAAGAGAGTGAGCACC	TC143610	1	1	21	618	638	UGACAGAAGAGAGUGAGCACC	::::: :::::::::::::	CAUGCUCUCUCUCUUCUGUCA	Cleavage	similar to UniRef100_P93015 Cluster: Squamosa promoter-binding-like protein 3; n=1; Arabidopsis thaliana|Rep: Squamosa promoter-binding-like protein 3 - Arabidopsis thaliana (Mouse-ear cress), partial (70%)
	bpe-miR156a-5p.C	TGACAGAAGAGAGTGAGCACC	TC140187	1	1	21	726	746	UGACAGAAGAGAGUGAGCACC	::::: :::::::::::::	CAUGCUCUCUCUCUUCUGUCA	Cleavage	similar to UniRef100_Q84JE4 Cluster: Squamosa promoter binding like-protein; n=1; Betula pendula|Rep: Squamosa promoter binding like-protein - Betula verrucosa (White birch) (Betula pendula), partial (80%)
	bpe-miR156a-5p.C	TGACAGAAGAGAGTGAGCACC	TC156260	1	1	21	645	665	UGACAGAAGAGAGUGAGCACC	::::: :::::::::::::	CAUGCUCCCUCUCUUCUGUCA	Cleavage	weakly similar to UniRef100_A7QPU0 Cluster: Chromosome chr10 scaffold_138, whole genome shotgun sequence; n=1; Vitis vinifera|Rep: Chromosome chr10 scaffold_138, whole genome shotgun sequence - Vitis vinifera (Grape), partial (78%)
	bpe-miR156a-5p.C	TGACAGAAGAGAGTGAGCACC	TC167753	1	1	21	637	657	UGACAGAAGAGAGUGAGCACC	::::: :::::::::::::	CAUGCUCCCUCUCUUCUGUCA	Cleavage	similar to UniRef100_Q5U8L4 Cluster: SBP transcription factor; n=1; Gossypium hirsutum|Rep: SBP transcription factor - Gossypium hirsutum (Upland cotton) (Gossypium mexicanum), partial (70%)
	bpe-miR156a-5p.C	TGACAGAAGAGAGTGAGCACC	TC138639	1	1	21	680	700	UGACAGAAGAGAGUGAGCACC	::::: :::::::::::::	AUUGCUCUCUCUCUUCUGUCA	Cleavage	similar to UniRef100_A7PJ70 Cluster: Chromosome chr12 scaffold_18, whole genome shotgun sequence; n=1; Vitis vinifera|Rep: Chromosome chr12 scaffold_18, whole genome shotgun sequence - Vitis vinifera (Grape), partial (70%)
	bpe-miR156a-5p.C	TGACAGAAGAGAGTGAGCACC	TC183201	1	1	21	904	924	UGACAGAAGAGAGUGAGCACC	::::: :::::::::::::	AUUGCUCUCUCUCUUCUGUCA	Cleavage	similar to UniRef100_Q52UU1 Cluster: Squamosa promoter binding-like protein; n=1; Betula platyphylla|Rep: Squamosa promoter binding-like protein - Betula platyphylla, partial (74%)
	bpe-miR156a-5p.C	TGACAGAAGAGAGTGAGCACC	TC181875	1	1	21	979	999	UGACAGAAGAGAGUGAGCACC	::::: :::::::::::::	AUUGCUCUCUCUCUUCUGUCA	Cleavage	homologue to UniRef100_Q96035 Cluster: Cytochrome oxidase subunit 3; n=1; Magnolia grandiflora|Rep: Cytochrome oxidase subunit 3 - Magnolia grandiflora (Southern magnolia), partial (69%)
	bpe-miR156a-5p.C	TGACAGAAGAGAGTGAGCACC	TC159843	2	1	21	31	51	UGACAGAAGAGAGUGAGCACC	: ::::. :::::::.:::::	GAUGCUUCCUCUCUUUUGUCA	Cleavage	similar to UniRef100_P93484 Cluster: Vacuolar-sorting receptor 1 precursor; n=1; Pisum sativum|Rep: Vacuolar-sorting receptor 1 precursor - Pisum sativum (Garden pea), partial (31%)
	bpe-miR156a-5p.C	TGACAGAAGAGAGTGAGCACC	TC138813	2.5	1	21	39	59	UGACAGAAGAGAGUGAGCACC	:::::::::.:::::::	AAAGCUCACUCUUUUCUGUCC	Cleavage	UniRef100_Q7EUR6 Cluster: AT4g05320/C17L7_240; n=8; core eudicotyledons|Rep: AT4g05320/C17L7_240 - Arabidopsis thaliana (Mouse-ear cress), partial (80%)
	bpe-miR156a-5p.C	TGACAGAAGAGAGTGAGCACC	TC146251	2.5	1	21	793	813	UGACAGAAGAGAGUGAGCACC	:::..::.::::::::::	UUAGCUUGCUUUCUUCUGUCA	Cleavage	similar to UniRef100_A7QQJ3 Cluster: Chromosome undetermined scaffold_143, whole genome shotgun sequence; n=1; Vitis vinifera|Rep: Chromosome undetermined scaffold_143, whole genome shotgun sequence - Vitis vinifera (Grape), partial (51%)
	bpe-miR156a-5p.C	TGACAGAAGAGAGTGAGCACC	TC154785	2.5	1	21	64	84	UGACAGAAGAGAGUGAGCACC	:::::.::::::::: :.:	ACUGCUCGCUCUCUUCUCUUA	Cleavage	similar to UniRef100_Q2HRW5 Cluster: Syntaxin, N-terminal; n=1; Medicago truncatula|Rep: Syntaxin, N-terminal - Medicago truncatula (Barrel medic), partial (77%)
	bpe-miR156a-5p.C	TGACAGAAGAGAGTGAGCACC	TC167513	2.5	1	21	258	278	UGACAGAAGAGAGUGAGCACC	:::::::::::::.: :.:	UCUGCUCACUCUCUUUUUUUA	Cleavage	similar to UniRef100_Q9XGI4 Cluster: Cyclin A2; n=1; Solanum lycopersicum|Rep: Cyclin A2 - Solanum lycopersicum (Tomato) (Lycopersicon esculentum), partial (20%)
	bpe-miR156a-5p.C	TGACAGAAGAGAGTGAGCACC	TC162499	2.5	1	21	10	30	UGACAGAAGAGAGUGAGCACC	: ::: :::::::.:::::	CUUCCUCUCUCUCUUUUGUCA	Cleavage	similar to UniRef100_Q3E7D0 Cluster: Nucleobase-ascorbate transporter 12; n=3; Arabidopsis thaliana|Rep: Nucleobase-ascorbate transporter 12 - Arabidopsis thaliana (Mouse-ear cress), partial (8%)
	bpe-miR156a-5p.C	TGACAGAAGAGAGTGAGCACC	AJ407505	3	1	21	248	267	UGACAGAAGAGAGUGAGCACC	::::::::::::::: ::::	UGUGCUCACUCUCUUC-GUCA	Cleavage	UniRef100_A7PEL7 Cluster: Chromosome chr11 scaffold_13 whole genome shotgun sequence; n=1; Vitis vinifera|Rep:, partial (1%)
	bpe-miR156a-5p.C	TGACAGAAGAGAGTGAGCACC	TC179911	3	1	21	451	471	UGACAGAAGAGAGUGAGCACC	::::::.::::::::.:	UAGACUCACUUUCUUCUGUUA	Cleavage	similar to UniRef100_Q6W2J5 Cluster: VDAC1.1; n=1; Lotus japonicus|Rep: VDAC1.1 - Lotus japonicus, partial (37%)
	bpe-miR156a-5p.C	TGACAGAAGAGAGTGAGCACC	TC145461	3	1	21	1021	1041	UGACAGAAGAGAGUGAGCACC	::::::.::::::::.:	UNNNCUCACUUUCUUCUGUUA	Cleavage	similar to UniRef100_Q6W2J5 Cluster: VDAC1.1; n=1; Lotus japonicus|Rep: VDAC1.1 - Lotus japonicus, complete
	bpe-miR156a-5p.C	TGACAGAAGAGAGTGAGCACC	TC140389	3	1	21	1024	1044	UGACAGAAGAGAGUGAGCACC	::::::.::::::::.:	UAGACUCACUUUCUUCUGUUA	Cleavage	similar to UniRef100_Q6W2J5 Cluster: VDAC1.1; n=1; Lotus japonicus|Rep: VDAC1.1 - Lotus japonicus, partial (98%)
	bpe-miR156a-5p.C	TGACAGAAGAGAGTGAGCACC	TC180503	3	1	21	247	267	UGACAGAAGAGAGUGAGCACC	::.::..:.:::::::::	CCUGUUCGUUUUCUUCUGUCC	Cleavage	weakly similar to UniRef100_A4BRK1 Cluster: Probable transporter; n=1; Nitrococcus mobilis Nb-231|Rep: Probable transporter - Nitrococcus mobilis Nb-231, partial (5%)
	bpe-miR156a-5p.C	TGACAGAAGAGAGTGAGCACC	TC156083	3	1	21	18	38	UGACAGAAGAGAGUGAGCACC	:::::::.:::::: :::	AAAGCUCACUUUCUUCUUUCA	Cleavage	weakly similar to UniRef100_Q84Q77 Cluster: 17.4 kDa class I heat shock protein 3; n=3; Oryza sativa|Rep: 17.4 kDa class I heat shock protein 3 - Oryza sativa subsp. japonica (Rice), partial (42%)
	bpe-miR156a-5p.C	TGACAGAAGAGAGTGAGCACC	TC157471	3	1	21	141	161	UGACAGAAGAGAGUGAGCACC	:::::::.:::::: :::	AAAGCUCACUUUCUUCUUUCA	Cleavage
	bpe-miR156a-5p.C	TGACAGAAGAGAGTGAGCACC	TC170385	3	1	21	145	165	UGACAGAAGAGAGUGAGCACC	::::..::::::::: :.:	CCUGCUUGCUCUCUUCUCUUA	Cleavage	homologue to UniRef100_A9V995 Cluster: Predicted protein; n=1; Monosiga brevicollis MX1|Rep: Predicted protein - Monosiga brevicollis MX1, partial (15%)
	bpe-miR156a-5p.C	TGACAGAAGAGAGTGAGCACC	TC147463	3	1	21	153	173	UGACAGAAGAGAGUGAGCACC	::::..::::::::: :.:	UCUGCUUGCUCUCUUCUAUUA	Cleavage	similar to UniRef100_A3IAY7 Cluster: Nitrogen fixation protein; n=1; Bacillus sp. B14905|Rep: Nitrogen fixation protein - Bacillus sp. B14905, partial (19%)
	bpe-miR156a-5p.C	TGACAGAAGAGAGTGAGCACC	DT469891	3	1	21	664	684	UGACAGAAGAGAGUGAGCACC	::.:.:.:.:.::::::.:	CAUGUUUAUUUUUUUCUGUUA	Cleavage	UniRef100_A7RQ83 Cluster: Predicted protein; n=1; Nematostella vectensis|Rep: Predicted protein - Nematostella vectensis (Starlet sea anemone), partial (12%)
	bpe-miR156a-5p.C	TGACAGAAGAGAGTGAGCACC	TC179956	3	1	21	1292	1312	UGACAGAAGAGAGUGAGCACC	::::::::. :::.:::.:	UCUGCUCACUUGCUUUUGUUA	Translation	similar to UniRef100_A7NUJ3 Cluster: Chromosome chr18 scaffold_1, whole genome shotgun sequence; n=1; Vitis vinifera|Rep: Chromosome chr18 scaffold_1, whole genome shotgun sequence - Vitis vinifera (Grape), partial (49%)
	bpe-miR156a-5p.C	TGACAGAAGAGAGTGAGCACC	TC181170	3	1	21	1438	1458	UGACAGAAGAGAGUGAGCACC	::::..::::.:::::: :	AUUGCUUGCUCUUUUCUGUAA	Cleavage	similar to UniRef100_A7NUV0 Cluster: Chromosome chr18 scaffold_1, whole genome shotgun sequence; n=1; Vitis vinifera|Rep: Chromosome chr18 scaffold_1, whole genome shotgun sequence - Vitis vinifera (Grape), partial (90%)
	bpe-miR156a-5p.C	TGACAGAAGAGAGTGAGCACC	DB876395	3	1	21	31	51	UGACAGAAGAGAGUGAGCACC	::.:: ::::::::: :::	UCUGUUCUCUCUCUUCUCUCA	Cleavage	similar to UniRef100_Q5BJ88 Cluster: Wasf1 protein; n=1; Xenopus tropicalis|Rep: Wasf1 protein - Xenopus tropicalis (Western clawed frog) (Silurana tropicalis), partial (5%)
	bpe-miR156a-5p.C	TGACAGAAGAGAGTGAGCACC	TC171875	3	1	19	1	19	UGACAGAAGAGAGUGAGCA	: ::.:: :::::::::::	UACUUACACUCUUCUGUCA	Cleavage	homologue to UniRef100_A7QDX2 Cluster: Chromosome chr4 scaffold_83, whole genome shotgun sequence; n=1; Vitis vinifera|Rep: Chromosome chr4 scaffold_83, whole genome shotgun sequence - Vitis vinifera (Grape), partial (23%)
	bpe-miR156a-5p.C	TGACAGAAGAGAGTGAGCACC	TC176385	3	1	21	505	525	UGACAGAAGAGAGUGAGCACC	: .: ::::::::::::.:	AUUUUUAACUCUCUUCUGUUA	Cleavage	similar to UniRef100_A7PU50 Cluster: Chromosome chr7 scaffold_31, whole genome shotgun sequence; n=1; Vitis vinifera|Rep: Chromosome chr7 scaffold_31, whole genome shotgun sequence - Vitis vinifera (Grape), partial (6%)
	bpe-miR156a-5p.C	TGACAGAAGAGAGTGAGCACC	DB880423	3	1	21	84	104	UGACAGAAGAGAGUGAGCACC	: ::. .::::::::::::	UUUUCUUUUUCUCUUCUGUCA	Cleavage	similar to UniRef100_A7PEZ5 Cluster: Chromosome chr11 scaffold_13, whole genome shotgun sequence; n=1; Vitis vinifera|Rep: Chromosome chr11 scaffold_13, whole genome shotgun sequence - Vitis vinifera (Grape), partial (51%)
	bpe-miR156a-5p.c	TGACAGAAGAGAGTGAGCA	TC170313	1	1	19	46	64	UGACAGAAGAGAGUGAGCA	::::: :::::::::::::	UGCUCUCUCUCUUCUGUCA	Cleavage
	bpe-miR156a-5p.c	TGACAGAAGAGAGTGAGCA	TC159682	1	1	19	43	61	UGACAGAAGAGAGUGAGCA	::::: :::::::::::::	UGCUCUCUCUCUUCUGUCA	Cleavage	similar to UniRef100_A7PFE5 Cluster: Chromosome chr11 scaffold_14, whole genome shotgun sequence; n=1; Vitis vinifera|Rep: Chromosome chr11 scaffold_14, whole genome shotgun sequence - Vitis vinifera (Grape), partial (6%)
	bpe-miR156a-5p.c	TGACAGAAGAGAGTGAGCA	TC156238	1	1	19	629	647	UGACAGAAGAGAGUGAGCA	::::: :::::::::::::	UGCUCUCUCUCUUCUGUCA	Cleavage	similar to UniRef100_A7QPU0 Cluster: Chromosome chr10 scaffold_138, whole genome shotgun sequence; n=1; Vitis vinifera|Rep: Chromosome chr10 scaffold_138, whole genome shotgun sequence - Vitis vinifera (Grape), partial (69%)
	bpe-miR156a-5p.c	TGACAGAAGAGAGTGAGCA	TC143610	1	1	19	620	638	UGACAGAAGAGAGUGAGCA	::::: :::::::::::::	UGCUCUCUCUCUUCUGUCA	Cleavage	similar to UniRef100_P93015 Cluster: Squamosa promoter-binding-like protein 3; n=1; Arabidopsis thaliana|Rep: Squamosa promoter-binding-like protein 3 - Arabidopsis thaliana (Mouse-ear cress), partial (70%)
	bpe-miR156a-5p.c	TGACAGAAGAGAGTGAGCA	CN523533	1	1	19	539	557	UGACAGAAGAGAGUGAGCA	::::: :::::::::::::	UGCUCUCUCUCUUCUGUCA	Cleavage	homologue to UniRef100_A2YGR5 Cluster: Squamosa promoter-binding-like protein 12; n=1; Oryza sativa Indica Group|Rep: Squamosa promoter-binding-like protein 12 - Oryza sativa subsp. indica (Rice), partial (13%)
	bpe-miR156a-5p.c	TGACAGAAGAGAGTGAGCA	TC162283	1	1	19	193	211	UGACAGAAGAGAGUGAGCA	::::: :::::::::::::	UGCUCUCUCUCUUCUGUCA	Cleavage	similar to UniRef100_A7PFE5 Cluster: Chromosome chr11 scaffold_14, whole genome shotgun sequence; n=1; Vitis vinifera|Rep: Chromosome chr11 scaffold_14, whole genome shotgun sequence - Vitis vinifera (Grape), partial (6%)
	bpe-miR156a-5p.c	TGACAGAAGAGAGTGAGCA	TC140187	1	1	19	728	746	UGACAGAAGAGAGUGAGCA	::::: :::::::::::::	UGCUCUCUCUCUUCUGUCA	Cleavage	similar to UniRef100_Q84JE4 Cluster: Squamosa promoter binding like-protein; n=1; Betula pendula|Rep: Squamosa promoter binding like-protein - Betula verrucosa (White birch) (Betula pendula), partial (80%)
	bpe-miR156a-5p.c	TGACAGAAGAGAGTGAGCA	TC139619	1	1	19	122	140	UGACAGAAGAGAGUGAGCA	::::: :::::::::::::	UGCUCUCUCUCUUCUGUCA	Cleavage	similar to UniRef100_Q94JW8 Cluster: Squamosa promoter-binding-like protein 6; n=1; Arabidopsis thaliana|Rep: Squamosa promoter-binding-like protein 6 - Arabidopsis thaliana (Mouse-ear cress), partial (9%)
	bpe-miR156a-5p.c	TGACAGAAGAGAGTGAGCA	TC156260	1	1	19	647	665	UGACAGAAGAGAGUGAGCA	::::: :::::::::::::	UGCUCCCUCUCUUCUGUCA	Cleavage	weakly similar to UniRef100_A7QPU0 Cluster: Chromosome chr10 scaffold_138, whole genome shotgun sequence; n=1; Vitis vinifera|Rep: Chromosome chr10 scaffold_138, whole genome shotgun sequence - Vitis vinifera (Grape), partial (78%)
	bpe-miR156a-5p.c	TGACAGAAGAGAGTGAGCA	TC167753	1	1	19	639	657	UGACAGAAGAGAGUGAGCA	::::: :::::::::::::	UGCUCCCUCUCUUCUGUCA	Cleavage	similar to UniRef100_Q5U8L4 Cluster: SBP transcription factor; n=1; Gossypium hirsutum|Rep: SBP transcription factor - Gossypium hirsutum (Upland cotton) (Gossypium mexicanum), partial (70%)
	bpe-miR156a-5p.c	TGACAGAAGAGAGTGAGCA	TC140194	1	1	19	392	410	UGACAGAAGAGAGUGAGCA	::::: :::::::::::::	UGCUCUCUCUCUUCUGUCA	Cleavage	similar to UniRef100_A7PKG5 Cluster: Chromosome chr15 scaffold_19, whole genome shotgun sequence; n=1; Vitis vinifera|Rep: Chromosome chr15 scaffold_19, whole genome shotgun sequence - Vitis vinifera (Grape), partial (67%)
	bpe-miR156a-5p.c	TGACAGAAGAGAGTGAGCA	TC138639	1	1	19	682	700	UGACAGAAGAGAGUGAGCA	::::: :::::::::::::	UGCUCUCUCUCUUCUGUCA	Cleavage	similar to UniRef100_A7PJ70 Cluster: Chromosome chr12 scaffold_18, whole genome shotgun sequence; n=1; Vitis vinifera|Rep: Chromosome chr12 scaffold_18, whole genome shotgun sequence - Vitis vinifera (Grape), partial (70%)
	bpe-miR156a-5p.c	TGACAGAAGAGAGTGAGCA	TC161130	1	1	19	424	442	UGACAGAAGAGAGUGAGCA	::::: :::::::::::::	UGCUCUCUCUCUUCUGUCA	Cleavage	similar to UniRef100_Q94JW8 Cluster: Squamosa promoter-binding-like protein 6; n=1; Arabidopsis thaliana|Rep: Squamosa promoter-binding-like protein 6 - Arabidopsis thaliana (Mouse-ear cress), partial (12%)
	bpe-miR156a-5p.c	TGACAGAAGAGAGTGAGCA	TC188289	1	1	19	482	500	UGACAGAAGAGAGUGAGCA	::::: :::::::::::::	UGCUCUCUCUCUUCUGUCA	Cleavage	similar to UniRef100_A7PFE5 Cluster: Chromosome chr11 scaffold_14, whole genome shotgun sequence; n=1; Vitis vinifera|Rep: Chromosome chr11 scaffold_14, whole genome shotgun sequence - Vitis vinifera (Grape), partial (13%)
	bpe-miR156a-5p.c	TGACAGAAGAGAGTGAGCA	TC183201	1	1	19	906	924	UGACAGAAGAGAGUGAGCA	::::: :::::::::::::	UGCUCUCUCUCUUCUGUCA	Cleavage	similar to UniRef100_Q52UU1 Cluster: Squamosa promoter binding-like protein; n=1; Betula platyphylla|Rep: Squamosa promoter binding-like protein - Betula platyphylla, partial (74%)
	bpe-miR156a-5p.c	TGACAGAAGAGAGTGAGCA	TC179932	1	1	19	833	851	UGACAGAAGAGAGUGAGCA	::::: :::::::::::::	UGCUCUCUCUCUUCUGUCA	Cleavage	similar to UniRef100_A7QP31 Cluster: Chromosome chr1 scaffold_136, whole genome shotgun sequence; n=1; Vitis vinifera|Rep: Chromosome chr1 scaffold_136, whole genome shotgun sequence - Vitis vinifera (Grape), partial (53%)
	bpe-miR156a-5p.c	TGACAGAAGAGAGTGAGCA	TC181875	1	1	19	981	999	UGACAGAAGAGAGUGAGCA	::::: :::::::::::::	UGCUCUCUCUCUUCUGUCA	Cleavage	homologue to UniRef100_Q96035 Cluster: Cytochrome oxidase subunit 3; n=1; Magnolia grandiflora|Rep: Cytochrome oxidase subunit 3 - Magnolia grandiflora (Southern magnolia), partial (69%)
	bpe-miR156a-5p.c	TGACAGAAGAGAGTGAGCA	TC155685	1	1	19	1163	1181	UGACAGAAGAGAGUGAGCA	::::: :::::::::::::	UGCUCUCUCUCUUCUGUCA	Cleavage	similar to UniRef100_Q6YZE8 Cluster: Squamosa promoter-binding-like protein 16; n=1; Oryza sativa Japonica Group|Rep: Squamosa promoter-binding-like protein 16 - Oryza sativa subsp. japonica (Rice), partial (24%)
	bpe-miR156a-5p.c	TGACAGAAGAGAGTGAGCA	TC150948	1	1	19	343	361	UGACAGAAGAGAGUGAGCA	::::: :::::::::::::	UGCUCUCUCUCUUCUGUCA	Cleavage	similar to UniRef100_A7PFE5 Cluster: Chromosome chr11 scaffold_14, whole genome shotgun sequence; n=1; Vitis vinifera|Rep: Chromosome chr11 scaffold_14, whole genome shotgun sequence - Vitis vinifera (Grape), partial (10%)
	bpe-miR156a-5p.c	TGACAGAAGAGAGTGAGCA	TC158039	1	1	19	697	715	UGACAGAAGAGAGUGAGCA	::::: :::::::::::::	UGCUCUCUCUCUUCUGUCA	Cleavage	similar to UniRef100_A7PFE5 Cluster: Chromosome chr11 scaffold_14, whole genome shotgun sequence; n=1; Vitis vinifera|Rep: Chromosome chr11 scaffold_14, whole genome shotgun sequence - Vitis vinifera (Grape), partial (49%)
	bpe-miR156a-5p.c	TGACAGAAGAGAGTGAGCA	TC183825	1	1	19	402	420	UGACAGAAGAGAGUGAGCA	::::: :::::::::::::	UGCUCUCUCUCUUCUGUCA	Cleavage	similar to UniRef100_A7PFE5 Cluster: Chromosome chr11 scaffold_14, whole genome shotgun sequence; n=1; Vitis vinifera|Rep: Chromosome chr11 scaffold_14, whole genome shotgun sequence - Vitis vinifera (Grape), partial (11%)
	bpe-miR156a-5p.c	TGACAGAAGAGAGTGAGCA	TC140316	1	1	19	1079	1097	UGACAGAAGAGAGUGAGCA	::::: :::::::::::::	UGCUCUCUCUCUUCUGUCA	Cleavage	similar to UniRef100_A7PKG5 Cluster: Chromosome chr15 scaffold_19, whole genome shotgun sequence; n=1; Vitis vinifera|Rep: Chromosome chr15 scaffold_19, whole genome shotgun sequence - Vitis vinifera (Grape), partial (72%)
	bpe-miR156a-5p.c	TGACAGAAGAGAGTGAGCA	TC159843	2	1	19	33	51	UGACAGAAGAGAGUGAGCA	::::. :::::::.:::::	UGCUUCCUCUCUUUUGUCA	Cleavage	similar to UniRef100_P93484 Cluster: Vacuolar-sorting receptor 1 precursor; n=1; Pisum sativum|Rep: Vacuolar-sorting receptor 1 precursor - Pisum sativum (Garden pea), partial (31%)
	bpe-miR156a-5p.c	TGACAGAAGAGAGTGAGCA	TC138813	2.5	1	19	41	59	UGACAGAAGAGAGUGAGCA	:::::::::.:::::::	AGCUCACUCUUUUCUGUCC	Cleavage	UniRef100_Q7EUR6 Cluster: AT4g05320/C17L7_240; n=8; core eudicotyledons|Rep: AT4g05320/C17L7_240 - Arabidopsis thaliana (Mouse-ear cress), partial (80%)
	bpe-miR156a-5p.c	TGACAGAAGAGAGTGAGCA	TC146251	2.5	1	19	795	813	UGACAGAAGAGAGUGAGCA	:::..::.::::::::::	AGCUUGCUUUCUUCUGUCA	Cleavage	similar to UniRef100_A7QQJ3 Cluster: Chromosome undetermined scaffold_143, whole genome shotgun sequence; n=1; Vitis vinifera|Rep: Chromosome undetermined scaffold_143, whole genome shotgun sequence - Vitis vinifera (Grape), partial (51%)
	bpe-miR156a-5p.c	TGACAGAAGAGAGTGAGCA	TC154785	2.5	1	19	66	84	UGACAGAAGAGAGUGAGCA	:::::.::::::::: :.:	UGCUCGCUCUCUUCUCUUA	Cleavage	similar to UniRef100_Q2HRW5 Cluster: Syntaxin, N-terminal; n=1; Medicago truncatula|Rep: Syntaxin, N-terminal - Medicago truncatula (Barrel medic), partial (77%)
	bpe-miR156a-5p.c	TGACAGAAGAGAGTGAGCA	TC167513	2.5	1	19	260	278	UGACAGAAGAGAGUGAGCA	:::::::::::::.: :.:	UGCUCACUCUCUUUUUUUA	Cleavage	similar to UniRef100_Q9XGI4 Cluster: Cyclin A2; n=1; Solanum lycopersicum|Rep: Cyclin A2 - Solanum lycopersicum (Tomato) (Lycopersicon esculentum), partial (20%)
	bpe-miR156a-5p.c	TGACAGAAGAGAGTGAGCA	TC162499	2.5	1	19	12	30	UGACAGAAGAGAGUGAGCA	: ::: :::::::.:::::	UCCUCUCUCUCUUUUGUCA	Cleavage	similar to UniRef100_Q3E7D0 Cluster: Nucleobase-ascorbate transporter 12; n=3; Arabidopsis thaliana|Rep: Nucleobase-ascorbate transporter 12 - Arabidopsis thaliana (Mouse-ear cress), partial (8%)
	bpe-miR156a-5p.c	TGACAGAAGAGAGTGAGCA	TC179911	3	1	19	453	471	UGACAGAAGAGAGUGAGCA	::::::.::::::::.:	GACUCACUUUCUUCUGUUA	Cleavage	similar to UniRef100_Q6W2J5 Cluster: VDAC1.1; n=1; Lotus japonicus|Rep: VDAC1.1 - Lotus japonicus, partial (37%)
	bpe-miR156a-5p.c	TGACAGAAGAGAGTGAGCA	TC145461	3	1	19	1023	1041	UGACAGAAGAGAGUGAGCA	::::::.::::::::.:	NNCUCACUUUCUUCUGUUA	Cleavage	similar to UniRef100_Q6W2J5 Cluster: VDAC1.1; n=1; Lotus japonicus|Rep: VDAC1.1 - Lotus japonicus, complete
	bpe-miR156a-5p.c	TGACAGAAGAGAGTGAGCA	TC140389	3	1	19	1026	1044	UGACAGAAGAGAGUGAGCA	::::::.::::::::.:	GACUCACUUUCUUCUGUUA	Cleavage	similar to UniRef100_Q6W2J5 Cluster: VDAC1.1; n=1; Lotus japonicus|Rep: VDAC1.1 - Lotus japonicus, partial (98%)
	bpe-miR156a-5p.c	TGACAGAAGAGAGTGAGCA	TC180503	3	1	19	249	267	UGACAGAAGAGAGUGAGCA	::.::..:.:::::::::	UGUUCGUUUUCUUCUGUCC	Cleavage	weakly similar to UniRef100_A4BRK1 Cluster: Probable transporter; n=1; Nitrococcus mobilis Nb-231|Rep: Probable transporter - Nitrococcus mobilis Nb-231, partial (5%)
	bpe-miR156a-5p.c	TGACAGAAGAGAGTGAGCA	TC156083	3	1	19	20	38	UGACAGAAGAGAGUGAGCA	:::::::.:::::: :::	AGCUCACUUUCUUCUUUCA	Cleavage	weakly similar to UniRef100_Q84Q77 Cluster: 17.4 kDa class I heat shock protein 3; n=3; Oryza sativa|Rep: 17.4 kDa class I heat shock protein 3 - Oryza sativa subsp. japonica (Rice), partial (42%)
	bpe-miR156a-5p.c	TGACAGAAGAGAGTGAGCA	TC157471	3	1	19	143	161	UGACAGAAGAGAGUGAGCA	:::::::.:::::: :::	AGCUCACUUUCUUCUUUCA	Cleavage
	bpe-miR156a-5p.c	TGACAGAAGAGAGTGAGCA	TC170385	3	1	19	147	165	UGACAGAAGAGAGUGAGCA	::::..::::::::: :.:	UGCUUGCUCUCUUCUCUUA	Cleavage	homologue to UniRef100_A9V995 Cluster: Predicted protein; n=1; Monosiga brevicollis MX1|Rep: Predicted protein - Monosiga brevicollis MX1, partial (15%)
	bpe-miR156a-5p.c	TGACAGAAGAGAGTGAGCA	TC147463	3	1	19	155	173	UGACAGAAGAGAGUGAGCA	::::..::::::::: :.:	UGCUUGCUCUCUUCUAUUA	Cleavage	similar to UniRef100_A3IAY7 Cluster: Nitrogen fixation protein; n=1; Bacillus sp. B14905|Rep: Nitrogen fixation protein - Bacillus sp. B14905, partial (19%)
	bpe-miR156a-5p.c	TGACAGAAGAGAGTGAGCA	DT469891	3	1	19	666	684	UGACAGAAGAGAGUGAGCA	::.:.:.:.:.::::::.:	UGUUUAUUUUUUUCUGUUA	Cleavage	UniRef100_A7RQ83 Cluster: Predicted protein; n=1; Nematostella vectensis|Rep: Predicted protein - Nematostella vectensis (Starlet sea anemone), partial (12%)
	bpe-miR156a-5p.c	TGACAGAAGAGAGTGAGCA	TC179956	3	1	19	1294	1312	UGACAGAAGAGAGUGAGCA	::::::::. :::.:::.:	UGCUCACUUGCUUUUGUUA	Translation	similar to UniRef100_A7NUJ3 Cluster: Chromosome chr18 scaffold_1, whole genome shotgun sequence; n=1; Vitis vinifera|Rep: Chromosome chr18 scaffold_1, whole genome shotgun sequence - Vitis vinifera (Grape), partial (49%)
	bpe-miR156a-5p.c	TGACAGAAGAGAGTGAGCA	TC181170	3	1	19	1440	1458	UGACAGAAGAGAGUGAGCA	::::..::::.:::::: :	UGCUUGCUCUUUUCUGUAA	Cleavage	similar to UniRef100_A7NUV0 Cluster: Chromosome chr18 scaffold_1, whole genome shotgun sequence; n=1; Vitis vinifera|Rep: Chromosome chr18 scaffold_1, whole genome shotgun sequence - Vitis vinifera (Grape), partial (90%)
	bpe-miR156a-5p.c	TGACAGAAGAGAGTGAGCA	AJ407505	3	1	19	250	267	UGACAGAAGAGAGUGAGCA	:::::::::::::: ::::	UGCUCACUCUCUUC-GUCA	Cleavage	UniRef100_A7PEL7 Cluster: Chromosome chr11 scaffold_13 whole genome shotgun sequence; n=1; Vitis vinifera|Rep:, partial (1%)
	bpe-miR156a-5p.c	TGACAGAAGAGAGTGAGCA	DB876395	3	1	19	33	51	UGACAGAAGAGAGUGAGCA	::.:: ::::::::: :::	UGUUCUCUCUCUUCUCUCA	Cleavage	similar to UniRef100_Q5BJ88 Cluster: Wasf1 protein; n=1; Xenopus tropicalis|Rep: Wasf1 protein - Xenopus tropicalis (Western clawed frog) (Silurana tropicalis), partial (5%)
	bpe-miR156a-5p.c	TGACAGAAGAGAGTGAGCA	TC171875	3	1	19	1	19	UGACAGAAGAGAGUGAGCA	: ::.:: :::::::::::	UACUUACACUCUUCUGUCA	Cleavage	homologue to UniRef100_A7QDX2 Cluster: Chromosome chr4 scaffold_83, whole genome shotgun sequence; n=1; Vitis vinifera|Rep: Chromosome chr4 scaffold_83, whole genome shotgun sequence - Vitis vinifera (Grape), partial (23%)
	bpe-miR156a-5p.c	TGACAGAAGAGAGTGAGCA	TC176385	3	1	19	507	525	UGACAGAAGAGAGUGAGCA	: .: ::::::::::::.:	UUUUAACUCUCUUCUGUUA	Cleavage	similar to UniRef100_A7PU50 Cluster: Chromosome chr7 scaffold_31, whole genome shotgun sequence; n=1; Vitis vinifera|Rep: Chromosome chr7 scaffold_31, whole genome shotgun sequence - Vitis vinifera (Grape), partial (6%)
	bpe-miR156a-5p.c	TGACAGAAGAGAGTGAGCA	DB880423	3	1	19	86	104	UGACAGAAGAGAGUGAGCA	: ::. .::::::::::::	UUCUUUUUCUCUUCUGUCA	Cleavage	similar to UniRef100_A7PEZ5 Cluster: Chromosome chr11 scaffold_13, whole genome shotgun sequence; n=1; Vitis vinifera|Rep: Chromosome chr11 scaffold_13, whole genome shotgun sequence - Vitis vinifera (Grape), partial (51%)
	bpe-miR156a-5p.C20G	TGACAGAAGAGAGTGAGCAG	TC138639	1	1	20	681	700	UGACAGAAGAGAGUGAGCAG	.::::: :::::::::::::	UUGCUCUCUCUCUUCUGUCA	Cleavage	similar to UniRef100_A7PJ70 Cluster: Chromosome chr12 scaffold_18, whole genome shotgun sequence; n=1; Vitis vinifera|Rep: Chromosome chr12 scaffold_18, whole genome shotgun sequence - Vitis vinifera (Grape), partial (70%)
	bpe-miR156a-5p.C20G	TGACAGAAGAGAGTGAGCAG	TC183201	1	1	20	905	924	UGACAGAAGAGAGUGAGCAG	.::::: :::::::::::::	UUGCUCUCUCUCUUCUGUCA	Cleavage	similar to UniRef100_Q52UU1 Cluster: Squamosa promoter binding-like protein; n=1; Betula platyphylla|Rep: Squamosa promoter binding-like protein - Betula platyphylla, partial (74%)
	bpe-miR156a-5p.C20G	TGACAGAAGAGAGTGAGCAG	TC181875	1	1	20	980	999	UGACAGAAGAGAGUGAGCAG	.::::: :::::::::::::	UUGCUCUCUCUCUUCUGUCA	Cleavage	homologue to UniRef100_Q96035 Cluster: Cytochrome oxidase subunit 3; n=1; Magnolia grandiflora|Rep: Cytochrome oxidase subunit 3 - Magnolia grandiflora (Southern magnolia), partial (69%)
	bpe-miR156a-5p.C20G	TGACAGAAGAGAGTGAGCAG	TC170313	1	1	20	45	64	UGACAGAAGAGAGUGAGCAG	::::: :::::::::::::	GUGCUCUCUCUCUUCUGUCA	Cleavage
	bpe-miR156a-5p.C20G	TGACAGAAGAGAGTGAGCAG	TC159682	1	1	20	42	61	UGACAGAAGAGAGUGAGCAG	::::: :::::::::::::	GUGCUCUCUCUCUUCUGUCA	Cleavage	similar to UniRef100_A7PFE5 Cluster: Chromosome chr11 scaffold_14, whole genome shotgun sequence; n=1; Vitis vinifera|Rep: Chromosome chr11 scaffold_14, whole genome shotgun sequence - Vitis vinifera (Grape), partial (6%)
	bpe-miR156a-5p.C20G	TGACAGAAGAGAGTGAGCAG	TC156238	1	1	20	628	647	UGACAGAAGAGAGUGAGCAG	::::: :::::::::::::	AUGCUCUCUCUCUUCUGUCA	Cleavage	similar to UniRef100_A7QPU0 Cluster: Chromosome chr10 scaffold_138, whole genome shotgun sequence; n=1; Vitis vinifera|Rep: Chromosome chr10 scaffold_138, whole genome shotgun sequence - Vitis vinifera (Grape), partial (69%)
	bpe-miR156a-5p.C20G	TGACAGAAGAGAGTGAGCAG	TC143610	1	1	20	619	638	UGACAGAAGAGAGUGAGCAG	::::: :::::::::::::	AUGCUCUCUCUCUUCUGUCA	Cleavage	similar to UniRef100_P93015 Cluster: Squamosa promoter-binding-like protein 3; n=1; Arabidopsis thaliana|Rep: Squamosa promoter-binding-like protein 3 - Arabidopsis thaliana (Mouse-ear cress), partial (70%)
	bpe-miR156a-5p.C20G	TGACAGAAGAGAGTGAGCAG	CN523533	1	1	20	538	557	UGACAGAAGAGAGUGAGCAG	::::: :::::::::::::	GUGCUCUCUCUCUUCUGUCA	Cleavage	homologue to UniRef100_A2YGR5 Cluster: Squamosa promoter-binding-like protein 12; n=1; Oryza sativa Indica Group|Rep: Squamosa promoter-binding-like protein 12 - Oryza sativa subsp. indica (Rice), partial (13%)
	bpe-miR156a-5p.C20G	TGACAGAAGAGAGTGAGCAG	TC162283	1	1	20	192	211	UGACAGAAGAGAGUGAGCAG	::::: :::::::::::::	GUGCUCUCUCUCUUCUGUCA	Cleavage	similar to UniRef100_A7PFE5 Cluster: Chromosome chr11 scaffold_14, whole genome shotgun sequence; n=1; Vitis vinifera|Rep: Chromosome chr11 scaffold_14, whole genome shotgun sequence - Vitis vinifera (Grape), partial (6%)
	bpe-miR156a-5p.C20G	TGACAGAAGAGAGTGAGCAG	TC140187	1	1	20	727	746	UGACAGAAGAGAGUGAGCAG	::::: :::::::::::::	AUGCUCUCUCUCUUCUGUCA	Cleavage	similar to UniRef100_Q84JE4 Cluster: Squamosa promoter binding like-protein; n=1; Betula pendula|Rep: Squamosa promoter binding like-protein - Betula verrucosa (White birch) (Betula pendula), partial (80%)
	bpe-miR156a-5p.C20G	TGACAGAAGAGAGTGAGCAG	TC139619	1	1	20	121	140	UGACAGAAGAGAGUGAGCAG	::::: :::::::::::::	GUGCUCUCUCUCUUCUGUCA	Cleavage	similar to UniRef100_Q94JW8 Cluster: Squamosa promoter-binding-like protein 6; n=1; Arabidopsis thaliana|Rep: Squamosa promoter-binding-like protein 6 - Arabidopsis thaliana (Mouse-ear cress), partial (9%)
	bpe-miR156a-5p.C20G	TGACAGAAGAGAGTGAGCAG	TC156260	1	1	20	646	665	UGACAGAAGAGAGUGAGCAG	::::: :::::::::::::	AUGCUCCCUCUCUUCUGUCA	Cleavage	weakly similar to UniRef100_A7QPU0 Cluster: Chromosome chr10 scaffold_138, whole genome shotgun sequence; n=1; Vitis vinifera|Rep: Chromosome chr10 scaffold_138, whole genome shotgun sequence - Vitis vinifera (Grape), partial (78%)
	bpe-miR156a-5p.C20G	TGACAGAAGAGAGTGAGCAG	TC167753	1	1	20	638	657	UGACAGAAGAGAGUGAGCAG	::::: :::::::::::::	AUGCUCCCUCUCUUCUGUCA	Cleavage	similar to UniRef100_Q5U8L4 Cluster: SBP transcription factor; n=1; Gossypium hirsutum|Rep: SBP transcription factor - Gossypium hirsutum (Upland cotton) (Gossypium mexicanum), partial (70%)
	bpe-miR156a-5p.C20G	TGACAGAAGAGAGTGAGCAG	TC140194	1	1	20	391	410	UGACAGAAGAGAGUGAGCAG	::::: :::::::::::::	GUGCUCUCUCUCUUCUGUCA	Cleavage	similar to UniRef100_A7PKG5 Cluster: Chromosome chr15 scaffold_19, whole genome shotgun sequence; n=1; Vitis vinifera|Rep: Chromosome chr15 scaffold_19, whole genome shotgun sequence - Vitis vinifera (Grape), partial (67%)
	bpe-miR156a-5p.C20G	TGACAGAAGAGAGTGAGCAG	TC161130	1	1	20	423	442	UGACAGAAGAGAGUGAGCAG	::::: :::::::::::::	GUGCUCUCUCUCUUCUGUCA	Cleavage	similar to UniRef100_Q94JW8 Cluster: Squamosa promoter-binding-like protein 6; n=1; Arabidopsis thaliana|Rep: Squamosa promoter-binding-like protein 6 - Arabidopsis thaliana (Mouse-ear cress), partial (12%)
	bpe-miR156a-5p.C20G	TGACAGAAGAGAGTGAGCAG	TC188289	1	1	20	481	500	UGACAGAAGAGAGUGAGCAG	::::: :::::::::::::	GUGCUCUCUCUCUUCUGUCA	Cleavage	similar to UniRef100_A7PFE5 Cluster: Chromosome chr11 scaffold_14, whole genome shotgun sequence; n=1; Vitis vinifera|Rep: Chromosome chr11 scaffold_14, whole genome shotgun sequence - Vitis vinifera (Grape), partial (13%)
	bpe-miR156a-5p.C20G	TGACAGAAGAGAGTGAGCAG	TC179932	1	1	20	832	851	UGACAGAAGAGAGUGAGCAG	::::: :::::::::::::	GUGCUCUCUCUCUUCUGUCA	Cleavage	similar to UniRef100_A7QP31 Cluster: Chromosome chr1 scaffold_136, whole genome shotgun sequence; n=1; Vitis vinifera|Rep: Chromosome chr1 scaffold_136, whole genome shotgun sequence - Vitis vinifera (Grape), partial (53%)
	bpe-miR156a-5p.C20G	TGACAGAAGAGAGTGAGCAG	TC155685	1	1	20	1162	1181	UGACAGAAGAGAGUGAGCAG	::::: :::::::::::::	GUGCUCUCUCUCUUCUGUCA	Cleavage	similar to UniRef100_Q6YZE8 Cluster: Squamosa promoter-binding-like protein 16; n=1; Oryza sativa Japonica Group|Rep: Squamosa promoter-binding-like protein 16 - Oryza sativa subsp. japonica (Rice), partial (24%)
	bpe-miR156a-5p.C20G	TGACAGAAGAGAGTGAGCAG	TC150948	1	1	20	342	361	UGACAGAAGAGAGUGAGCAG	::::: :::::::::::::	GUGCUCUCUCUCUUCUGUCA	Cleavage	similar to UniRef100_A7PFE5 Cluster: Chromosome chr11 scaffold_14, whole genome shotgun sequence; n=1; Vitis vinifera|Rep: Chromosome chr11 scaffold_14, whole genome shotgun sequence - Vitis vinifera (Grape), partial (10%)
	bpe-miR156a-5p.C20G	TGACAGAAGAGAGTGAGCAG	TC158039	1	1	20	696	715	UGACAGAAGAGAGUGAGCAG	::::: :::::::::::::	GUGCUCUCUCUCUUCUGUCA	Cleavage	similar to UniRef100_A7PFE5 Cluster: Chromosome chr11 scaffold_14, whole genome shotgun sequence; n=1; Vitis vinifera|Rep: Chromosome chr11 scaffold_14, whole genome shotgun sequence - Vitis vinifera (Grape), partial (49%)
	bpe-miR156a-5p.C20G	TGACAGAAGAGAGTGAGCAG	TC183825	1	1	20	401	420	UGACAGAAGAGAGUGAGCAG	::::: :::::::::::::	GUGCUCUCUCUCUUCUGUCA	Cleavage	similar to UniRef100_A7PFE5 Cluster: Chromosome chr11 scaffold_14, whole genome shotgun sequence; n=1; Vitis vinifera|Rep: Chromosome chr11 scaffold_14, whole genome shotgun sequence - Vitis vinifera (Grape), partial (11%)
	bpe-miR156a-5p.C20G	TGACAGAAGAGAGTGAGCAG	TC140316	1	1	20	1078	1097	UGACAGAAGAGAGUGAGCAG	::::: :::::::::::::	GUGCUCUCUCUCUUCUGUCA	Cleavage	similar to UniRef100_A7PKG5 Cluster: Chromosome chr15 scaffold_19, whole genome shotgun sequence; n=1; Vitis vinifera|Rep: Chromosome chr15 scaffold_19, whole genome shotgun sequence - Vitis vinifera (Grape), partial (72%)
	bpe-miR156a-5p.C20G	TGACAGAAGAGAGTGAGCAG	TC159843	2	1	20	32	51	UGACAGAAGAGAGUGAGCAG	::::. :::::::.:::::	AUGCUUCCUCUCUUUUGUCA	Cleavage	similar to UniRef100_P93484 Cluster: Vacuolar-sorting receptor 1 precursor; n=1; Pisum sativum|Rep: Vacuolar-sorting receptor 1 precursor - Pisum sativum (Garden pea), partial (31%)
	bpe-miR156a-5p.C20G	TGACAGAAGAGAGTGAGCAG	TC154785	2.5	1	20	65	84	UGACAGAAGAGAGUGAGCAG	::::::.::::::::: :.:	CUGCUCGCUCUCUUCUCUUA	Cleavage	similar to UniRef100_Q2HRW5 Cluster: Syntaxin, N-terminal; n=1; Medicago truncatula|Rep: Syntaxin, N-terminal - Medicago truncatula (Barrel medic), partial (77%)
	bpe-miR156a-5p.C20G	TGACAGAAGAGAGTGAGCAG	TC167513	2.5	1	20	259	278	UGACAGAAGAGAGUGAGCAG	::::::::::::::.: :.:	CUGCUCACUCUCUUUUUUUA	Cleavage	similar to UniRef100_Q9XGI4 Cluster: Cyclin A2; n=1; Solanum lycopersicum|Rep: Cyclin A2 - Solanum lycopersicum (Tomato) (Lycopersicon esculentum), partial (20%)
	bpe-miR156a-5p.C20G	TGACAGAAGAGAGTGAGCAG	TC138813	2.5	1	20	40	59	UGACAGAAGAGAGUGAGCAG	:::::::::.:::::::	AAGCUCACUCUUUUCUGUCC	Cleavage	UniRef100_Q7EUR6 Cluster: AT4g05320/C17L7_240; n=8; core eudicotyledons|Rep: AT4g05320/C17L7_240 - Arabidopsis thaliana (Mouse-ear cress), partial (80%)
	bpe-miR156a-5p.C20G	TGACAGAAGAGAGTGAGCAG	TC146251	2.5	1	20	794	813	UGACAGAAGAGAGUGAGCAG	:::..::.::::::::::	UAGCUUGCUUUCUUCUGUCA	Cleavage	similar to UniRef100_A7QQJ3 Cluster: Chromosome undetermined scaffold_143, whole genome shotgun sequence; n=1; Vitis vinifera|Rep: Chromosome undetermined scaffold_143, whole genome shotgun sequence - Vitis vinifera (Grape), partial (51%)
	bpe-miR156a-5p.C20G	TGACAGAAGAGAGTGAGCAG	TC162499	2.5	1	20	11	30	UGACAGAAGAGAGUGAGCAG	.: ::: :::::::.:::::	UUCCUCUCUCUCUUUUGUCA	Cleavage	similar to UniRef100_Q3E7D0 Cluster: Nucleobase-ascorbate transporter 12; n=3; Arabidopsis thaliana|Rep: Nucleobase-ascorbate transporter 12 - Arabidopsis thaliana (Mouse-ear cress), partial (8%)
	bpe-miR156a-5p.C20G	TGACAGAAGAGAGTGAGCAG	TC180503	3	1	20	248	267	UGACAGAAGAGAGUGAGCAG	:::.::..:.:::::::::	CUGUUCGUUUUCUUCUGUCC	Cleavage	weakly similar to UniRef100_A4BRK1 Cluster: Probable transporter; n=1; Nitrococcus mobilis Nb-231|Rep: Probable transporter - Nitrococcus mobilis Nb-231, partial (5%)
	bpe-miR156a-5p.C20G	TGACAGAAGAGAGTGAGCAG	TC170385	3	1	20	146	165	UGACAGAAGAGAGUGAGCAG	:::::..::::::::: :.:	CUGCUUGCUCUCUUCUCUUA	Cleavage	homologue to UniRef100_A9V995 Cluster: Predicted protein; n=1; Monosiga brevicollis MX1|Rep: Predicted protein - Monosiga brevicollis MX1, partial (15%)
	bpe-miR156a-5p.C20G	TGACAGAAGAGAGTGAGCAG	TC147463	3	1	20	154	173	UGACAGAAGAGAGUGAGCAG	:::::..::::::::: :.:	CUGCUUGCUCUCUUCUAUUA	Cleavage	similar to UniRef100_A3IAY7 Cluster: Nitrogen fixation protein; n=1; Bacillus sp. B14905|Rep: Nitrogen fixation protein - Bacillus sp. B14905, partial (19%)
	bpe-miR156a-5p.C20G	TGACAGAAGAGAGTGAGCAG	TC179956	3	1	20	1293	1312	UGACAGAAGAGAGUGAGCAG	:::::::::. :::.:::.:	CUGCUCACUUGCUUUUGUUA	Translation	similar to UniRef100_A7NUJ3 Cluster: Chromosome chr18 scaffold_1, whole genome shotgun sequence; n=1; Vitis vinifera|Rep: Chromosome chr18 scaffold_1, whole genome shotgun sequence - Vitis vinifera (Grape), partial (49%)
	bpe-miR156a-5p.C20G	TGACAGAAGAGAGTGAGCAG	DB876395	3	1	20	32	51	UGACAGAAGAGAGUGAGCAG	:::.:: ::::::::: :::	CUGUUCUCUCUCUUCUCUCA	Cleavage	similar to UniRef100_Q5BJ88 Cluster: Wasf1 protein; n=1; Xenopus tropicalis|Rep: Wasf1 protein - Xenopus tropicalis (Western clawed frog) (Silurana tropicalis), partial (5%)
	bpe-miR156a-5p.C20G	TGACAGAAGAGAGTGAGCAG	TC179911	3	1	20	452	471	UGACAGAAGAGAGUGAGCAG	::::::.::::::::.:	AGACUCACUUUCUUCUGUUA	Cleavage	similar to UniRef100_Q6W2J5 Cluster: VDAC1.1; n=1; Lotus japonicus|Rep: VDAC1.1 - Lotus japonicus, partial (37%)
	bpe-miR156a-5p.C20G	TGACAGAAGAGAGTGAGCAG	TC145461	3	1	20	1022	1041	UGACAGAAGAGAGUGAGCAG	::::::.::::::::.:	NNNCUCACUUUCUUCUGUUA	Cleavage	similar to UniRef100_Q6W2J5 Cluster: VDAC1.1; n=1; Lotus japonicus|Rep: VDAC1.1 - Lotus japonicus, complete
	bpe-miR156a-5p.C20G	TGACAGAAGAGAGTGAGCAG	TC140389	3	1	20	1025	1044	UGACAGAAGAGAGUGAGCAG	::::::.::::::::.:	AGACUCACUUUCUUCUGUUA	Cleavage	similar to UniRef100_Q6W2J5 Cluster: VDAC1.1; n=1; Lotus japonicus|Rep: VDAC1.1 - Lotus japonicus, partial (98%)
	bpe-miR156a-5p.C20G	TGACAGAAGAGAGTGAGCAG	TC181170	3	1	20	1439	1458	UGACAGAAGAGAGUGAGCAG	.::::..::::.:::::: :	UUGCUUGCUCUUUUCUGUAA	Cleavage	similar to UniRef100_A7NUV0 Cluster: Chromosome chr18 scaffold_1, whole genome shotgun sequence; n=1; Vitis vinifera|Rep: Chromosome chr18 scaffold_1, whole genome shotgun sequence - Vitis vinifera (Grape), partial (90%)
	bpe-miR156a-5p.C20G	TGACAGAAGAGAGTGAGCAG	TC156083	3	1	20	19	38	UGACAGAAGAGAGUGAGCAG	:::::::.:::::: :::	AAGCUCACUUUCUUCUUUCA	Cleavage	weakly similar to UniRef100_Q84Q77 Cluster: 17.4 kDa class I heat shock protein 3; n=3; Oryza sativa|Rep: 17.4 kDa class I heat shock protein 3 - Oryza sativa subsp. japonica (Rice), partial (42%)
	bpe-miR156a-5p.C20G	TGACAGAAGAGAGTGAGCAG	TC157471	3	1	20	142	161	UGACAGAAGAGAGUGAGCAG	:::::::.:::::: :::	AAGCUCACUUUCUUCUUUCA	Cleavage
	bpe-miR156a-5p.C20G	TGACAGAAGAGAGTGAGCAG	DT469891	3	1	20	665	684	UGACAGAAGAGAGUGAGCAG	::.:.:.:.:.::::::.:	AUGUUUAUUUUUUUCUGUUA	Cleavage	UniRef100_A7RQ83 Cluster: Predicted protein; n=1; Nematostella vectensis|Rep: Predicted protein - Nematostella vectensis (Starlet sea anemone), partial (12%)
	bpe-miR156a-5p.C20G	TGACAGAAGAGAGTGAGCAG	AJ407505	3	1	20	249	267	UGACAGAAGAGAGUGAGCAG	:::::::::::::: ::::	GUGCUCACUCUCUUC-GUCA	Cleavage	UniRef100_A7PEL7 Cluster: Chromosome chr11 scaffold_13 whole genome shotgun sequence; n=1; Vitis vinifera|Rep:, partial (1%)
	bpe-miR156a-5p.C20G	TGACAGAAGAGAGTGAGCAG	TC171875	3	1	19	1	19	UGACAGAAGAGAGUGAGCA	: ::.:: :::::::::::	UACUUACACUCUUCUGUCA	Cleavage	homologue to UniRef100_A7QDX2 Cluster: Chromosome chr4 scaffold_83, whole genome shotgun sequence; n=1; Vitis vinifera|Rep: Chromosome chr4 scaffold_83, whole genome shotgun sequence - Vitis vinifera (Grape), partial (23%)
	bpe-miR156a-5p.C20G	TGACAGAAGAGAGTGAGCAG	TC176385	3	1	20	506	525	UGACAGAAGAGAGUGAGCAG	.: .: ::::::::::::.:	UUUUUAACUCUCUUCUGUUA	Cleavage	similar to UniRef100_A7PU50 Cluster: Chromosome chr7 scaffold_31, whole genome shotgun sequence; n=1; Vitis vinifera|Rep: Chromosome chr7 scaffold_31, whole genome shotgun sequence - Vitis vinifera (Grape), partial (6%)
	bpe-miR156a-5p.C20G	TGACAGAAGAGAGTGAGCAG	DB880423	3	1	20	85	104	UGACAGAAGAGAGUGAGCAG	.: ::. .::::::::::::	UUUCUUUUUCUCUUCUGUCA	Cleavage	similar to UniRef100_A7PEZ5 Cluster: Chromosome chr11 scaffold_13, whole genome shotgun sequence; n=1; Vitis vinifera|Rep: Chromosome chr11 scaffold_13, whole genome shotgun sequence - Vitis vinifera (Grape), partial (51%)
	bpe-miR156a-5p.C20G.C	TGACAGAAGAGAGTGAGCAGC	TC138639	1	1	21	680	700	UGACAGAAGAGAGUGAGCAGC	.::::: :::::::::::::	AUUGCUCUCUCUCUUCUGUCA	Cleavage	similar to UniRef100_A7PJ70 Cluster: Chromosome chr12 scaffold_18, whole genome shotgun sequence; n=1; Vitis vinifera|Rep: Chromosome chr12 scaffold_18, whole genome shotgun sequence - Vitis vinifera (Grape), partial (70%)
	bpe-miR156a-5p.C20G.C	TGACAGAAGAGAGTGAGCAGC	TC183201	1	1	21	904	924	UGACAGAAGAGAGUGAGCAGC	.::::: :::::::::::::	AUUGCUCUCUCUCUUCUGUCA	Cleavage	similar to UniRef100_Q52UU1 Cluster: Squamosa promoter binding-like protein; n=1; Betula platyphylla|Rep: Squamosa promoter binding-like protein - Betula platyphylla, partial (74%)
	bpe-miR156a-5p.C20G.C	TGACAGAAGAGAGTGAGCAGC	TC181875	1	1	21	979	999	UGACAGAAGAGAGUGAGCAGC	.::::: :::::::::::::	AUUGCUCUCUCUCUUCUGUCA	Cleavage	homologue to UniRef100_Q96035 Cluster: Cytochrome oxidase subunit 3; n=1; Magnolia grandiflora|Rep: Cytochrome oxidase subunit 3 - Magnolia grandiflora (Southern magnolia), partial (69%)
	bpe-miR156a-5p.C20G.C	TGACAGAAGAGAGTGAGCAGC	TC170313	1	1	21	44	64	UGACAGAAGAGAGUGAGCAGC	::::: :::::::::::::	UGUGCUCUCUCUCUUCUGUCA	Cleavage
	bpe-miR156a-5p.C20G.C	TGACAGAAGAGAGTGAGCAGC	TC159682	1	1	21	41	61	UGACAGAAGAGAGUGAGCAGC	::::: :::::::::::::	CGUGCUCUCUCUCUUCUGUCA	Cleavage	similar to UniRef100_A7PFE5 Cluster: Chromosome chr11 scaffold_14, whole genome shotgun sequence; n=1; Vitis vinifera|Rep: Chromosome chr11 scaffold_14, whole genome shotgun sequence - Vitis vinifera (Grape), partial (6%)
	bpe-miR156a-5p.C20G.C	TGACAGAAGAGAGTGAGCAGC	TC156238	1	1	21	627	647	UGACAGAAGAGAGUGAGCAGC	::::: :::::::::::::	CAUGCUCUCUCUCUUCUGUCA	Cleavage	similar to UniRef100_A7QPU0 Cluster: Chromosome chr10 scaffold_138, whole genome shotgun sequence; n=1; Vitis vinifera|Rep: Chromosome chr10 scaffold_138, whole genome shotgun sequence - Vitis vinifera (Grape), partial (69%)
	bpe-miR156a-5p.C20G.C	TGACAGAAGAGAGTGAGCAGC	TC143610	1	1	21	618	638	UGACAGAAGAGAGUGAGCAGC	::::: :::::::::::::	CAUGCUCUCUCUCUUCUGUCA	Cleavage	similar to UniRef100_P93015 Cluster: Squamosa promoter-binding-like protein 3; n=1; Arabidopsis thaliana|Rep: Squamosa promoter-binding-like protein 3 - Arabidopsis thaliana (Mouse-ear cress), partial (70%)
	bpe-miR156a-5p.C20G.C	TGACAGAAGAGAGTGAGCAGC	CN523533	1	1	21	537	557	UGACAGAAGAGAGUGAGCAGC	::::: :::::::::::::	CGUGCUCUCUCUCUUCUGUCA	Cleavage	homologue to UniRef100_A2YGR5 Cluster: Squamosa promoter-binding-like protein 12; n=1; Oryza sativa Indica Group|Rep: Squamosa promoter-binding-like protein 12 - Oryza sativa subsp. indica (Rice), partial (13%)
	bpe-miR156a-5p.C20G.C	TGACAGAAGAGAGTGAGCAGC	TC162283	1	1	21	191	211	UGACAGAAGAGAGUGAGCAGC	::::: :::::::::::::	CGUGCUCUCUCUCUUCUGUCA	Cleavage	similar to UniRef100_A7PFE5 Cluster: Chromosome chr11 scaffold_14, whole genome shotgun sequence; n=1; Vitis vinifera|Rep: Chromosome chr11 scaffold_14, whole genome shotgun sequence - Vitis vinifera (Grape), partial (6%)
	bpe-miR156a-5p.C20G.C	TGACAGAAGAGAGTGAGCAGC	TC140187	1	1	21	726	746	UGACAGAAGAGAGUGAGCAGC	::::: :::::::::::::	CAUGCUCUCUCUCUUCUGUCA	Cleavage	similar to UniRef100_Q84JE4 Cluster: Squamosa promoter binding like-protein; n=1; Betula pendula|Rep: Squamosa promoter binding like-protein - Betula verrucosa (White birch) (Betula pendula), partial (80%)
	bpe-miR156a-5p.C20G.C	TGACAGAAGAGAGTGAGCAGC	TC139619	1	1	21	120	140	UGACAGAAGAGAGUGAGCAGC	::::: :::::::::::::	UGUGCUCUCUCUCUUCUGUCA	Cleavage	similar to UniRef100_Q94JW8 Cluster: Squamosa promoter-binding-like protein 6; n=1; Arabidopsis thaliana|Rep: Squamosa promoter-binding-like protein 6 - Arabidopsis thaliana (Mouse-ear cress), partial (9%)
	bpe-miR156a-5p.C20G.C	TGACAGAAGAGAGTGAGCAGC	TC156260	1	1	21	645	665	UGACAGAAGAGAGUGAGCAGC	::::: :::::::::::::	CAUGCUCCCUCUCUUCUGUCA	Cleavage	weakly similar to UniRef100_A7QPU0 Cluster: Chromosome chr10 scaffold_138, whole genome shotgun sequence; n=1; Vitis vinifera|Rep: Chromosome chr10 scaffold_138, whole genome shotgun sequence - Vitis vinifera (Grape), partial (78%)
	bpe-miR156a-5p.C20G.C	TGACAGAAGAGAGTGAGCAGC	TC167753	1	1	21	637	657	UGACAGAAGAGAGUGAGCAGC	::::: :::::::::::::	CAUGCUCCCUCUCUUCUGUCA	Cleavage	similar to UniRef100_Q5U8L4 Cluster: SBP transcription factor; n=1; Gossypium hirsutum|Rep: SBP transcription factor - Gossypium hirsutum (Upland cotton) (Gossypium mexicanum), partial (70%)
	bpe-miR156a-5p.C20G.C	TGACAGAAGAGAGTGAGCAGC	TC140194	1	1	21	390	410	UGACAGAAGAGAGUGAGCAGC	::::: :::::::::::::	UGUGCUCUCUCUCUUCUGUCA	Cleavage	similar to UniRef100_A7PKG5 Cluster: Chromosome chr15 scaffold_19, whole genome shotgun sequence; n=1; Vitis vinifera|Rep: Chromosome chr15 scaffold_19, whole genome shotgun sequence - Vitis vinifera (Grape), partial (67%)
	bpe-miR156a-5p.C20G.C	TGACAGAAGAGAGTGAGCAGC	TC161130	1	1	21	422	442	UGACAGAAGAGAGUGAGCAGC	::::: :::::::::::::	UGUGCUCUCUCUCUUCUGUCA	Cleavage	similar to UniRef100_Q94JW8 Cluster: Squamosa promoter-binding-like protein 6; n=1; Arabidopsis thaliana|Rep: Squamosa promoter-binding-like protein 6 - Arabidopsis thaliana (Mouse-ear cress), partial (12%)
	bpe-miR156a-5p.C20G.C	TGACAGAAGAGAGTGAGCAGC	TC188289	1	1	21	480	500	UGACAGAAGAGAGUGAGCAGC	::::: :::::::::::::	CGUGCUCUCUCUCUUCUGUCA	Cleavage	similar to UniRef100_A7PFE5 Cluster: Chromosome chr11 scaffold_14, whole genome shotgun sequence; n=1; Vitis vinifera|Rep: Chromosome chr11 scaffold_14, whole genome shotgun sequence - Vitis vinifera (Grape), partial (13%)
	bpe-miR156a-5p.C20G.C	TGACAGAAGAGAGTGAGCAGC	TC179932	1	1	21	831	851	UGACAGAAGAGAGUGAGCAGC	::::: :::::::::::::	CGUGCUCUCUCUCUUCUGUCA	Cleavage	similar to UniRef100_A7QP31 Cluster: Chromosome chr1 scaffold_136, whole genome shotgun sequence; n=1; Vitis vinifera|Rep: Chromosome chr1 scaffold_136, whole genome shotgun sequence - Vitis vinifera (Grape), partial (53%)
	bpe-miR156a-5p.C20G.C	TGACAGAAGAGAGTGAGCAGC	TC155685	1	1	21	1161	1181	UGACAGAAGAGAGUGAGCAGC	::::: :::::::::::::	UGUGCUCUCUCUCUUCUGUCA	Cleavage	similar to UniRef100_Q6YZE8 Cluster: Squamosa promoter-binding-like protein 16; n=1; Oryza sativa Japonica Group|Rep: Squamosa promoter-binding-like protein 16 - Oryza sativa subsp. japonica (Rice), partial (24%)
	bpe-miR156a-5p.C20G.C	TGACAGAAGAGAGTGAGCAGC	TC150948	1	1	21	341	361	UGACAGAAGAGAGUGAGCAGC	::::: :::::::::::::	CGUGCUCUCUCUCUUCUGUCA	Cleavage	similar to UniRef100_A7PFE5 Cluster: Chromosome chr11 scaffold_14, whole genome shotgun sequence; n=1; Vitis vinifera|Rep: Chromosome chr11 scaffold_14, whole genome shotgun sequence - Vitis vinifera (Grape), partial (10%)
	bpe-miR156a-5p.C20G.C	TGACAGAAGAGAGTGAGCAGC	TC158039	1	1	21	695	715	UGACAGAAGAGAGUGAGCAGC	::::: :::::::::::::	CGUGCUCUCUCUCUUCUGUCA	Cleavage	similar to UniRef100_A7PFE5 Cluster: Chromosome chr11 scaffold_14, whole genome shotgun sequence; n=1; Vitis vinifera|Rep: Chromosome chr11 scaffold_14, whole genome shotgun sequence - Vitis vinifera (Grape), partial (49%)
	bpe-miR156a-5p.C20G.C	TGACAGAAGAGAGTGAGCAGC	TC183825	1	1	21	400	420	UGACAGAAGAGAGUGAGCAGC	::::: :::::::::::::	CGUGCUCUCUCUCUUCUGUCA	Cleavage	similar to UniRef100_A7PFE5 Cluster: Chromosome chr11 scaffold_14, whole genome shotgun sequence; n=1; Vitis vinifera|Rep: Chromosome chr11 scaffold_14, whole genome shotgun sequence - Vitis vinifera (Grape), partial (11%)
	bpe-miR156a-5p.C20G.C	TGACAGAAGAGAGTGAGCAGC	TC140316	1	1	21	1077	1097	UGACAGAAGAGAGUGAGCAGC	::::: :::::::::::::	UGUGCUCUCUCUCUUCUGUCA	Cleavage	similar to UniRef100_A7PKG5 Cluster: Chromosome chr15 scaffold_19, whole genome shotgun sequence; n=1; Vitis vinifera|Rep: Chromosome chr15 scaffold_19, whole genome shotgun sequence - Vitis vinifera (Grape), partial (72%)
	bpe-miR156a-5p.C20G.C	TGACAGAAGAGAGTGAGCAGC	TC159843	2	1	21	31	51	UGACAGAAGAGAGUGAGCAGC	: ::::. :::::::.:::::	GAUGCUUCCUCUCUUUUGUCA	Cleavage	similar to UniRef100_P93484 Cluster: Vacuolar-sorting receptor 1 precursor; n=1; Pisum sativum|Rep: Vacuolar-sorting receptor 1 precursor - Pisum sativum (Garden pea), partial (31%)
	bpe-miR156a-5p.C20G.C	TGACAGAAGAGAGTGAGCAGC	TC154785	2.5	1	21	64	84	UGACAGAAGAGAGUGAGCAGC	::::::.::::::::: :.:	ACUGCUCGCUCUCUUCUCUUA	Cleavage	similar to UniRef100_Q2HRW5 Cluster: Syntaxin, N-terminal; n=1; Medicago truncatula|Rep: Syntaxin, N-terminal - Medicago truncatula (Barrel medic), partial (77%)
	bpe-miR156a-5p.C20G.C	TGACAGAAGAGAGTGAGCAGC	TC167513	2.5	1	21	258	278	UGACAGAAGAGAGUGAGCAGC	::::::::::::::.: :.:	UCUGCUCACUCUCUUUUUUUA	Cleavage	similar to UniRef100_Q9XGI4 Cluster: Cyclin A2; n=1; Solanum lycopersicum|Rep: Cyclin A2 - Solanum lycopersicum (Tomato) (Lycopersicon esculentum), partial (20%)
	bpe-miR156a-5p.C20G.C	TGACAGAAGAGAGTGAGCAGC	TC138813	2.5	1	21	39	59	UGACAGAAGAGAGUGAGCAGC	:::::::::.:::::::	AAAGCUCACUCUUUUCUGUCC	Cleavage	UniRef100_Q7EUR6 Cluster: AT4g05320/C17L7_240; n=8; core eudicotyledons|Rep: AT4g05320/C17L7_240 - Arabidopsis thaliana (Mouse-ear cress), partial (80%)
	bpe-miR156a-5p.C20G.C	TGACAGAAGAGAGTGAGCAGC	TC146251	2.5	1	21	793	813	UGACAGAAGAGAGUGAGCAGC	:::..::.::::::::::	UUAGCUUGCUUUCUUCUGUCA	Cleavage	similar to UniRef100_A7QQJ3 Cluster: Chromosome undetermined scaffold_143, whole genome shotgun sequence; n=1; Vitis vinifera|Rep: Chromosome undetermined scaffold_143, whole genome shotgun sequence - Vitis vinifera (Grape), partial (51%)
	bpe-miR156a-5p.C20G.C	TGACAGAAGAGAGTGAGCAGC	TC162499	2.5	1	21	10	30	UGACAGAAGAGAGUGAGCAGC	.: ::: :::::::.:::::	CUUCCUCUCUCUCUUUUGUCA	Cleavage	similar to UniRef100_Q3E7D0 Cluster: Nucleobase-ascorbate transporter 12; n=3; Arabidopsis thaliana|Rep: Nucleobase-ascorbate transporter 12 - Arabidopsis thaliana (Mouse-ear cress), partial (8%)
	bpe-miR156a-5p.C20G.C	TGACAGAAGAGAGTGAGCAGC	TC180503	3	1	21	247	267	UGACAGAAGAGAGUGAGCAGC	:::.::..:.:::::::::	CCUGUUCGUUUUCUUCUGUCC	Cleavage	weakly similar to UniRef100_A4BRK1 Cluster: Probable transporter; n=1; Nitrococcus mobilis Nb-231|Rep: Probable transporter - Nitrococcus mobilis Nb-231, partial (5%)
	bpe-miR156a-5p.C20G.C	TGACAGAAGAGAGTGAGCAGC	TC170385	3	1	21	145	165	UGACAGAAGAGAGUGAGCAGC	:::::..::::::::: :.:	CCUGCUUGCUCUCUUCUCUUA	Cleavage	homologue to UniRef100_A9V995 Cluster: Predicted protein; n=1; Monosiga brevicollis MX1|Rep: Predicted protein - Monosiga brevicollis MX1, partial (15%)
	bpe-miR156a-5p.C20G.C	TGACAGAAGAGAGTGAGCAGC	TC147463	3	1	21	153	173	UGACAGAAGAGAGUGAGCAGC	:::::..::::::::: :.:	UCUGCUUGCUCUCUUCUAUUA	Cleavage	similar to UniRef100_A3IAY7 Cluster: Nitrogen fixation protein; n=1; Bacillus sp. B14905|Rep: Nitrogen fixation protein - Bacillus sp. B14905, partial (19%)
	bpe-miR156a-5p.C20G.C	TGACAGAAGAGAGTGAGCAGC	TC179956	3	1	21	1292	1312	UGACAGAAGAGAGUGAGCAGC	:::::::::. :::.:::.:	UCUGCUCACUUGCUUUUGUUA	Translation	similar to UniRef100_A7NUJ3 Cluster: Chromosome chr18 scaffold_1, whole genome shotgun sequence; n=1; Vitis vinifera|Rep: Chromosome chr18 scaffold_1, whole genome shotgun sequence - Vitis vinifera (Grape), partial (49%)
	bpe-miR156a-5p.C20G.C	TGACAGAAGAGAGTGAGCAGC	DB876395	3	1	21	31	51	UGACAGAAGAGAGUGAGCAGC	:::.:: ::::::::: :::	UCUGUUCUCUCUCUUCUCUCA	Cleavage	similar to UniRef100_Q5BJ88 Cluster: Wasf1 protein; n=1; Xenopus tropicalis|Rep: Wasf1 protein - Xenopus tropicalis (Western clawed frog) (Silurana tropicalis), partial (5%)
	bpe-miR156a-5p.C20G.C	TGACAGAAGAGAGTGAGCAGC	TC179911	3	1	21	451	471	UGACAGAAGAGAGUGAGCAGC	::::::.::::::::.:	UAGACUCACUUUCUUCUGUUA	Cleavage	similar to UniRef100_Q6W2J5 Cluster: VDAC1.1; n=1; Lotus japonicus|Rep: VDAC1.1 - Lotus japonicus, partial (37%)
	bpe-miR156a-5p.C20G.C	TGACAGAAGAGAGTGAGCAGC	TC145461	3	1	21	1021	1041	UGACAGAAGAGAGUGAGCAGC	::::::.::::::::.:	UNNNCUCACUUUCUUCUGUUA	Cleavage	similar to UniRef100_Q6W2J5 Cluster: VDAC1.1; n=1; Lotus japonicus|Rep: VDAC1.1 - Lotus japonicus, complete
	bpe-miR156a-5p.C20G.C	TGACAGAAGAGAGTGAGCAGC	TC140389	3	1	21	1024	1044	UGACAGAAGAGAGUGAGCAGC	::::::.::::::::.:	UAGACUCACUUUCUUCUGUUA	Cleavage	similar to UniRef100_Q6W2J5 Cluster: VDAC1.1; n=1; Lotus japonicus|Rep: VDAC1.1 - Lotus japonicus, partial (98%)
	bpe-miR156a-5p.C20G.C	TGACAGAAGAGAGTGAGCAGC	TC181170	3	1	21	1438	1458	UGACAGAAGAGAGUGAGCAGC	.::::..::::.:::::: :	AUUGCUUGCUCUUUUCUGUAA	Cleavage	similar to UniRef100_A7NUV0 Cluster: Chromosome chr18 scaffold_1, whole genome shotgun sequence; n=1; Vitis vinifera|Rep: Chromosome chr18 scaffold_1, whole genome shotgun sequence - Vitis vinifera (Grape), partial (90%)
	bpe-miR156a-5p.C20G.C	TGACAGAAGAGAGTGAGCAGC	TC156083	3	1	21	18	38	UGACAGAAGAGAGUGAGCAGC	:::::::.:::::: :::	AAAGCUCACUUUCUUCUUUCA	Cleavage	weakly similar to UniRef100_Q84Q77 Cluster: 17.4 kDa class I heat shock protein 3; n=3; Oryza sativa|Rep: 17.4 kDa class I heat shock protein 3 - Oryza sativa subsp. japonica (Rice), partial (42%)
	bpe-miR156a-5p.C20G.C	TGACAGAAGAGAGTGAGCAGC	TC157471	3	1	21	141	161	UGACAGAAGAGAGUGAGCAGC	:::::::.:::::: :::	AAAGCUCACUUUCUUCUUUCA	Cleavage
	bpe-miR156a-5p.C20G.C	TGACAGAAGAGAGTGAGCAGC	DT469891	3	1	21	664	684	UGACAGAAGAGAGUGAGCAGC	::.:.:.:.:.::::::.:	CAUGUUUAUUUUUUUCUGUUA	Cleavage	UniRef100_A7RQ83 Cluster: Predicted protein; n=1; Nematostella vectensis|Rep: Predicted protein - Nematostella vectensis (Starlet sea anemone), partial (12%)
	bpe-miR156a-5p.C20G.C	TGACAGAAGAGAGTGAGCAGC	AJ407505	3	1	21	248	267	UGACAGAAGAGAGUGAGCAGC	:::::::::::::: ::::	UGUGCUCACUCUCUUC-GUCA	Cleavage	UniRef100_A7PEL7 Cluster: Chromosome chr11 scaffold_13 whole genome shotgun sequence; n=1; Vitis vinifera|Rep:, partial (1%)
	bpe-miR156a-5p.C20G.C	TGACAGAAGAGAGTGAGCAGC	TC171875	3	1	19	1	19	UGACAGAAGAGAGUGAGCA	: ::.:: :::::::::::	UACUUACACUCUUCUGUCA	Cleavage	homologue to UniRef100_A7QDX2 Cluster: Chromosome chr4 scaffold_83, whole genome shotgun sequence; n=1; Vitis vinifera|Rep: Chromosome chr4 scaffold_83, whole genome shotgun sequence - Vitis vinifera (Grape), partial (23%)
	bpe-miR156a-5p.C20G.C	TGACAGAAGAGAGTGAGCAGC	TC176385	3	1	21	505	525	UGACAGAAGAGAGUGAGCAGC	.: .: ::::::::::::.:	AUUUUUAACUCUCUUCUGUUA	Cleavage	similar to UniRef100_A7PU50 Cluster: Chromosome chr7 scaffold_31, whole genome shotgun sequence; n=1; Vitis vinifera|Rep: Chromosome chr7 scaffold_31, whole genome shotgun sequence - Vitis vinifera (Grape), partial (6%)
	bpe-miR156a-5p.C20G.C	TGACAGAAGAGAGTGAGCAGC	DB880423	3	1	21	84	104	UGACAGAAGAGAGUGAGCAGC	.: ::. .::::::::::::	UUUUCUUUUUCUCUUCUGUCA	Cleavage	similar to UniRef100_A7PEZ5 Cluster: Chromosome chr11 scaffold_13, whole genome shotgun sequence; n=1; Vitis vinifera|Rep: Chromosome chr11 scaffold_13, whole genome shotgun sequence - Vitis vinifera (Grape), partial (51%)
	bpe-miR156a-5p.C20G.C.T	TGACAGAAGAGAGTGAGCAGCT	TC138639	1	1	22	679	700	UGACAGAAGAGAGUGAGCAGCU	.::::: :::::::::::::	GAUUGCUCUCUCUCUUCUGUCA	Cleavage	similar to UniRef100_A7PJ70 Cluster: Chromosome chr12 scaffold_18, whole genome shotgun sequence; n=1; Vitis vinifera|Rep: Chromosome chr12 scaffold_18, whole genome shotgun sequence - Vitis vinifera (Grape), partial (70%)
	bpe-miR156a-5p.C20G.C.T	TGACAGAAGAGAGTGAGCAGCT	TC183201	1	1	22	903	924	UGACAGAAGAGAGUGAGCAGCU	.::::: :::::::::::::	GAUUGCUCUCUCUCUUCUGUCA	Cleavage	similar to UniRef100_Q52UU1 Cluster: Squamosa promoter binding-like protein; n=1; Betula platyphylla|Rep: Squamosa promoter binding-like protein - Betula platyphylla, partial (74%)
	bpe-miR156a-5p.C20G.C.T	TGACAGAAGAGAGTGAGCAGCT	TC181875	1	1	22	978	999	UGACAGAAGAGAGUGAGCAGCU	.::::: :::::::::::::	GAUUGCUCUCUCUCUUCUGUCA	Cleavage	homologue to UniRef100_Q96035 Cluster: Cytochrome oxidase subunit 3; n=1; Magnolia grandiflora|Rep: Cytochrome oxidase subunit 3 - Magnolia grandiflora (Southern magnolia), partial (69%)
	bpe-miR156a-5p.C20G.C.T	TGACAGAAGAGAGTGAGCAGCT	TC170313	1	1	22	43	64	UGACAGAAGAGAGUGAGCAGCU	::::: :::::::::::::	UUGUGCUCUCUCUCUUCUGUCA	Cleavage
	bpe-miR156a-5p.C20G.C.T	TGACAGAAGAGAGTGAGCAGCT	TC159682	1	1	22	40	61	UGACAGAAGAGAGUGAGCAGCU	::::: :::::::::::::	UCGUGCUCUCUCUCUUCUGUCA	Cleavage	similar to UniRef100_A7PFE5 Cluster: Chromosome chr11 scaffold_14, whole genome shotgun sequence; n=1; Vitis vinifera|Rep: Chromosome chr11 scaffold_14, whole genome shotgun sequence - Vitis vinifera (Grape), partial (6%)
	bpe-miR156a-5p.C20G.C.T	TGACAGAAGAGAGTGAGCAGCT	TC156238	1	1	22	626	647	UGACAGAAGAGAGUGAGCAGCU	::::: :::::::::::::	GCAUGCUCUCUCUCUUCUGUCA	Cleavage	similar to UniRef100_A7QPU0 Cluster: Chromosome chr10 scaffold_138, whole genome shotgun sequence; n=1; Vitis vinifera|Rep: Chromosome chr10 scaffold_138, whole genome shotgun sequence - Vitis vinifera (Grape), partial (69%)
	bpe-miR156a-5p.C20G.C.T	TGACAGAAGAGAGTGAGCAGCT	TC143610	1	1	22	617	638	UGACAGAAGAGAGUGAGCAGCU	::::: :::::::::::::	GCAUGCUCUCUCUCUUCUGUCA	Cleavage	similar to UniRef100_P93015 Cluster: Squamosa promoter-binding-like protein 3; n=1; Arabidopsis thaliana|Rep: Squamosa promoter-binding-like protein 3 - Arabidopsis thaliana (Mouse-ear cress), partial (70%)
	bpe-miR156a-5p.C20G.C.T	TGACAGAAGAGAGTGAGCAGCT	CN523533	1	1	22	536	557	UGACAGAAGAGAGUGAGCAGCU	::::: :::::::::::::	UCGUGCUCUCUCUCUUCUGUCA	Cleavage	homologue to UniRef100_A2YGR5 Cluster: Squamosa promoter-binding-like protein 12; n=1; Oryza sativa Indica Group|Rep: Squamosa promoter-binding-like protein 12 - Oryza sativa subsp. indica (Rice), partial (13%)
	bpe-miR156a-5p.C20G.C.T	TGACAGAAGAGAGTGAGCAGCT	TC162283	1	1	22	190	211	UGACAGAAGAGAGUGAGCAGCU	::::: :::::::::::::	UCGUGCUCUCUCUCUUCUGUCA	Cleavage	similar to UniRef100_A7PFE5 Cluster: Chromosome chr11 scaffold_14, whole genome shotgun sequence; n=1; Vitis vinifera|Rep: Chromosome chr11 scaffold_14, whole genome shotgun sequence - Vitis vinifera (Grape), partial (6%)
	bpe-miR156a-5p.C20G.C.T	TGACAGAAGAGAGTGAGCAGCT	TC140187	1	1	22	725	746	UGACAGAAGAGAGUGAGCAGCU	::::: :::::::::::::	CCAUGCUCUCUCUCUUCUGUCA	Cleavage	similar to UniRef100_Q84JE4 Cluster: Squamosa promoter binding like-protein; n=1; Betula pendula|Rep: Squamosa promoter binding like-protein - Betula verrucosa (White birch) (Betula pendula), partial (80%)
	bpe-miR156a-5p.C20G.C.T	TGACAGAAGAGAGTGAGCAGCT	TC139619	1	1	22	119	140	UGACAGAAGAGAGUGAGCAGCU	::::: :::::::::::::	CUGUGCUCUCUCUCUUCUGUCA	Cleavage	similar to UniRef100_Q94JW8 Cluster: Squamosa promoter-binding-like protein 6; n=1; Arabidopsis thaliana|Rep: Squamosa promoter-binding-like protein 6 - Arabidopsis thaliana (Mouse-ear cress), partial (9%)
	bpe-miR156a-5p.C20G.C.T	TGACAGAAGAGAGTGAGCAGCT	TC156260	1	1	22	644	665	UGACAGAAGAGAGUGAGCAGCU	::::: :::::::::::::	GCAUGCUCCCUCUCUUCUGUCA	Cleavage	weakly similar to UniRef100_A7QPU0 Cluster: Chromosome chr10 scaffold_138, whole genome shotgun sequence; n=1; Vitis vinifera|Rep: Chromosome chr10 scaffold_138, whole genome shotgun sequence - Vitis vinifera (Grape), partial (78%)
	bpe-miR156a-5p.C20G.C.T	TGACAGAAGAGAGTGAGCAGCT	TC167753	1	1	22	636	657	UGACAGAAGAGAGUGAGCAGCU	::::: :::::::::::::	GCAUGCUCCCUCUCUUCUGUCA	Cleavage	similar to UniRef100_Q5U8L4 Cluster: SBP transcription factor; n=1; Gossypium hirsutum|Rep: SBP transcription factor - Gossypium hirsutum (Upland cotton) (Gossypium mexicanum), partial (70%)
	bpe-miR156a-5p.C20G.C.T	TGACAGAAGAGAGTGAGCAGCT	TC140194	1	1	22	389	410	UGACAGAAGAGAGUGAGCAGCU	::::: :::::::::::::	AUGUGCUCUCUCUCUUCUGUCA	Cleavage	similar to UniRef100_A7PKG5 Cluster: Chromosome chr15 scaffold_19, whole genome shotgun sequence; n=1; Vitis vinifera|Rep: Chromosome chr15 scaffold_19, whole genome shotgun sequence - Vitis vinifera (Grape), partial (67%)
	bpe-miR156a-5p.C20G.C.T	TGACAGAAGAGAGTGAGCAGCT	TC161130	1	1	22	421	442	UGACAGAAGAGAGUGAGCAGCU	::::: :::::::::::::	CUGUGCUCUCUCUCUUCUGUCA	Cleavage	similar to UniRef100_Q94JW8 Cluster: Squamosa promoter-binding-like protein 6; n=1; Arabidopsis thaliana|Rep: Squamosa promoter-binding-like protein 6 - Arabidopsis thaliana (Mouse-ear cress), partial (12%)
	bpe-miR156a-5p.C20G.C.T	TGACAGAAGAGAGTGAGCAGCT	TC188289	1	1	22	479	500	UGACAGAAGAGAGUGAGCAGCU	::::: :::::::::::::	UCGUGCUCUCUCUCUUCUGUCA	Cleavage	similar to UniRef100_A7PFE5 Cluster: Chromosome chr11 scaffold_14, whole genome shotgun sequence; n=1; Vitis vinifera|Rep: Chromosome chr11 scaffold_14, whole genome shotgun sequence - Vitis vinifera (Grape), partial (13%)
	bpe-miR156a-5p.C20G.C.T	TGACAGAAGAGAGTGAGCAGCT	TC179932	1	1	22	830	851	UGACAGAAGAGAGUGAGCAGCU	::::: :::::::::::::	CCGUGCUCUCUCUCUUCUGUCA	Cleavage	similar to UniRef100_A7QP31 Cluster: Chromosome chr1 scaffold_136, whole genome shotgun sequence; n=1; Vitis vinifera|Rep: Chromosome chr1 scaffold_136, whole genome shotgun sequence - Vitis vinifera (Grape), partial (53%)
	bpe-miR156a-5p.C20G.C.T	TGACAGAAGAGAGTGAGCAGCT	TC155685	1	1	22	1160	1181	UGACAGAAGAGAGUGAGCAGCU	::::: :::::::::::::	UUGUGCUCUCUCUCUUCUGUCA	Cleavage	similar to UniRef100_Q6YZE8 Cluster: Squamosa promoter-binding-like protein 16; n=1; Oryza sativa Japonica Group|Rep: Squamosa promoter-binding-like protein 16 - Oryza sativa subsp. japonica (Rice), partial (24%)
	bpe-miR156a-5p.C20G.C.T	TGACAGAAGAGAGTGAGCAGCT	TC150948	1	1	22	340	361	UGACAGAAGAGAGUGAGCAGCU	::::: :::::::::::::	UCGUGCUCUCUCUCUUCUGUCA	Cleavage	similar to UniRef100_A7PFE5 Cluster: Chromosome chr11 scaffold_14, whole genome shotgun sequence; n=1; Vitis vinifera|Rep: Chromosome chr11 scaffold_14, whole genome shotgun sequence - Vitis vinifera (Grape), partial (10%)
	bpe-miR156a-5p.C20G.C.T	TGACAGAAGAGAGTGAGCAGCT	TC158039	1	1	22	694	715	UGACAGAAGAGAGUGAGCAGCU	::::: :::::::::::::	GCGUGCUCUCUCUCUUCUGUCA	Cleavage	similar to UniRef100_A7PFE5 Cluster: Chromosome chr11 scaffold_14, whole genome shotgun sequence; n=1; Vitis vinifera|Rep: Chromosome chr11 scaffold_14, whole genome shotgun sequence - Vitis vinifera (Grape), partial (49%)
	bpe-miR156a-5p.C20G.C.T	TGACAGAAGAGAGTGAGCAGCT	TC183825	1	1	22	399	420	UGACAGAAGAGAGUGAGCAGCU	::::: :::::::::::::	UCGUGCUCUCUCUCUUCUGUCA	Cleavage	similar to UniRef100_A7PFE5 Cluster: Chromosome chr11 scaffold_14, whole genome shotgun sequence; n=1; Vitis vinifera|Rep: Chromosome chr11 scaffold_14, whole genome shotgun sequence - Vitis vinifera (Grape), partial (11%)
	bpe-miR156a-5p.C20G.C.T	TGACAGAAGAGAGTGAGCAGCT	TC140316	1	1	22	1076	1097	UGACAGAAGAGAGUGAGCAGCU	::::: :::::::::::::	AUGUGCUCUCUCUCUUCUGUCA	Cleavage	similar to UniRef100_A7PKG5 Cluster: Chromosome chr15 scaffold_19, whole genome shotgun sequence; n=1; Vitis vinifera|Rep: Chromosome chr15 scaffold_19, whole genome shotgun sequence - Vitis vinifera (Grape), partial (72%)
	bpe-miR156a-5p.C20G.C.T	TGACAGAAGAGAGTGAGCAGCT	TC159843	2	1	22	30	51	UGACAGAAGAGAGUGAGCAGCU	: ::::. :::::::.:::::	UGAUGCUUCCUCUCUUUUGUCA	Cleavage	similar to UniRef100_P93484 Cluster: Vacuolar-sorting receptor 1 precursor; n=1; Pisum sativum|Rep: Vacuolar-sorting receptor 1 precursor - Pisum sativum (Garden pea), partial (31%)
	bpe-miR156a-5p.C20G.C.T	TGACAGAAGAGAGTGAGCAGCT	TC154785	2.5	1	22	63	84	UGACAGAAGAGAGUGAGCAGCU	::::::.::::::::: :.:	CACUGCUCGCUCUCUUCUCUUA	Cleavage	similar to UniRef100_Q2HRW5 Cluster: Syntaxin, N-terminal; n=1; Medicago truncatula|Rep: Syntaxin, N-terminal - Medicago truncatula (Barrel medic), partial (77%)
	bpe-miR156a-5p.C20G.C.T	TGACAGAAGAGAGTGAGCAGCT	TC167513	2.5	1	22	257	278	UGACAGAAGAGAGUGAGCAGCU	::::::::::::::.: :.:	UUCUGCUCACUCUCUUUUUUUA	Cleavage	similar to UniRef100_Q9XGI4 Cluster: Cyclin A2; n=1; Solanum lycopersicum|Rep: Cyclin A2 - Solanum lycopersicum (Tomato) (Lycopersicon esculentum), partial (20%)
	bpe-miR156a-5p.C20G.C.T	TGACAGAAGAGAGTGAGCAGCT	TC138813	2.5	1	22	38	59	UGACAGAAGAGAGUGAGCAGCU	:::::::::.:::::::	UAAAGCUCACUCUUUUCUGUCC	Cleavage	UniRef100_Q7EUR6 Cluster: AT4g05320/C17L7_240; n=8; core eudicotyledons|Rep: AT4g05320/C17L7_240 - Arabidopsis thaliana (Mouse-ear cress), partial (80%)
	bpe-miR156a-5p.C20G.C.T	TGACAGAAGAGAGTGAGCAGCT	TC146251	2.5	1	22	792	813	UGACAGAAGAGAGUGAGCAGCU	:::..::.::::::::::	AUUAGCUUGCUUUCUUCUGUCA	Cleavage	similar to UniRef100_A7QQJ3 Cluster: Chromosome undetermined scaffold_143, whole genome shotgun sequence; n=1; Vitis vinifera|Rep: Chromosome undetermined scaffold_143, whole genome shotgun sequence - Vitis vinifera (Grape), partial (51%)
	bpe-miR156a-5p.C20G.C.T	TGACAGAAGAGAGTGAGCAGCT	TC162499	2.5	1	22	9	30	UGACAGAAGAGAGUGAGCAGCU	.: ::: :::::::.:::::	UCUUCCUCUCUCUCUUUUGUCA	Cleavage	similar to UniRef100_Q3E7D0 Cluster: Nucleobase-ascorbate transporter 12; n=3; Arabidopsis thaliana|Rep: Nucleobase-ascorbate transporter 12 - Arabidopsis thaliana (Mouse-ear cress), partial (8%)
	bpe-miR156a-5p.C20G.C.T	TGACAGAAGAGAGTGAGCAGCT	TC180503	3	1	22	246	267	UGACAGAAGAGAGUGAGCAGCU	:::.::..:.:::::::::	UCCUGUUCGUUUUCUUCUGUCC	Cleavage	weakly similar to UniRef100_A4BRK1 Cluster: Probable transporter; n=1; Nitrococcus mobilis Nb-231|Rep: Probable transporter - Nitrococcus mobilis Nb-231, partial (5%)
	bpe-miR156a-5p.C20G.C.T	TGACAGAAGAGAGTGAGCAGCT	TC170385	3	1	22	144	165	UGACAGAAGAGAGUGAGCAGCU	:::::..::::::::: :.:	UCCUGCUUGCUCUCUUCUCUUA	Cleavage	homologue to UniRef100_A9V995 Cluster: Predicted protein; n=1; Monosiga brevicollis MX1|Rep: Predicted protein - Monosiga brevicollis MX1, partial (15%)
	bpe-miR156a-5p.C20G.C.T	TGACAGAAGAGAGTGAGCAGCT	TC147463	3	1	22	152	173	UGACAGAAGAGAGUGAGCAGCU	:::::..::::::::: :.:	UUCUGCUUGCUCUCUUCUAUUA	Cleavage	similar to UniRef100_A3IAY7 Cluster: Nitrogen fixation protein; n=1; Bacillus sp. B14905|Rep: Nitrogen fixation protein - Bacillus sp. B14905, partial (19%)
	bpe-miR156a-5p.C20G.C.T	TGACAGAAGAGAGTGAGCAGCT	TC179956	3	1	22	1291	1312	UGACAGAAGAGAGUGAGCAGCU	:::::::::. :::.:::.:	UUCUGCUCACUUGCUUUUGUUA	Translation	similar to UniRef100_A7NUJ3 Cluster: Chromosome chr18 scaffold_1, whole genome shotgun sequence; n=1; Vitis vinifera|Rep: Chromosome chr18 scaffold_1, whole genome shotgun sequence - Vitis vinifera (Grape), partial (49%)
	bpe-miR156a-5p.C20G.C.T	TGACAGAAGAGAGTGAGCAGCT	DB876395	3	1	22	30	51	UGACAGAAGAGAGUGAGCAGCU	:::.:: ::::::::: :::	GUCUGUUCUCUCUCUUCUCUCA	Cleavage	similar to UniRef100_Q5BJ88 Cluster: Wasf1 protein; n=1; Xenopus tropicalis|Rep: Wasf1 protein - Xenopus tropicalis (Western clawed frog) (Silurana tropicalis), partial (5%)
	bpe-miR156a-5p.C20G.C.T	TGACAGAAGAGAGTGAGCAGCT	TC179911	3	1	22	450	471	UGACAGAAGAGAGUGAGCAGCU	::::::.::::::::.:	CUAGACUCACUUUCUUCUGUUA	Cleavage	similar to UniRef100_Q6W2J5 Cluster: VDAC1.1; n=1; Lotus japonicus|Rep: VDAC1.1 - Lotus japonicus, partial (37%)
	bpe-miR156a-5p.C20G.C.T	TGACAGAAGAGAGTGAGCAGCT	TC145461	3	1	22	1020	1041	UGACAGAAGAGAGUGAGCAGCU	::::::.::::::::.:	CUNNNCUCACUUUCUUCUGUUA	Cleavage	similar to UniRef100_Q6W2J5 Cluster: VDAC1.1; n=1; Lotus japonicus|Rep: VDAC1.1 - Lotus japonicus, complete
	bpe-miR156a-5p.C20G.C.T	TGACAGAAGAGAGTGAGCAGCT	TC140389	3	1	22	1023	1044	UGACAGAAGAGAGUGAGCAGCU	::::::.::::::::.:	CUAGACUCACUUUCUUCUGUUA	Cleavage	similar to UniRef100_Q6W2J5 Cluster: VDAC1.1; n=1; Lotus japonicus|Rep: VDAC1.1 - Lotus japonicus, partial (98%)
	bpe-miR156a-5p.C20G.C.T	TGACAGAAGAGAGTGAGCAGCT	TC181170	3	1	22	1437	1458	UGACAGAAGAGAGUGAGCAGCU	.::::..::::.:::::: :	GAUUGCUUGCUCUUUUCUGUAA	Cleavage	similar to UniRef100_A7NUV0 Cluster: Chromosome chr18 scaffold_1, whole genome shotgun sequence; n=1; Vitis vinifera|Rep: Chromosome chr18 scaffold_1, whole genome shotgun sequence - Vitis vinifera (Grape), partial (90%)
	bpe-miR156a-5p.C20G.C.T	TGACAGAAGAGAGTGAGCAGCT	TC156083	3	1	22	17	38	UGACAGAAGAGAGUGAGCAGCU	:::::::.:::::: :::	CAAAGCUCACUUUCUUCUUUCA	Cleavage	weakly similar to UniRef100_Q84Q77 Cluster: 17.4 kDa class I heat shock protein 3; n=3; Oryza sativa|Rep: 17.4 kDa class I heat shock protein 3 - Oryza sativa subsp. japonica (Rice), partial (42%)
	bpe-miR156a-5p.C20G.C.T	TGACAGAAGAGAGTGAGCAGCT	TC157471	3	1	22	140	161	UGACAGAAGAGAGUGAGCAGCU	:::::::.:::::: :::	CAAAGCUCACUUUCUUCUUUCA	Cleavage
	bpe-miR156a-5p.C20G.C.T	TGACAGAAGAGAGTGAGCAGCT	AJ407505	3	1	22	247	267	UGACAGAAGAGAGUGAGCAGCU	:::::::::::::: ::::	CUGUGCUCACUCUCUUC-GUCA	Cleavage	UniRef100_A7PEL7 Cluster: Chromosome chr11 scaffold_13 whole genome shotgun sequence; n=1; Vitis vinifera|Rep:, partial (1%)
	bpe-miR156a-5p.CC	TGACAGAAGAGAGTGAGCACCC	TC158039	1	1	22	694	715	UGACAGAAGAGAGUGAGCACCC	: :::::: :::::::::::::	GCGUGCUCUCUCUCUUCUGUCA	Cleavage	similar to UniRef100_A7PFE5 Cluster: Chromosome chr11 scaffold_14, whole genome shotgun sequence; n=1; Vitis vinifera|Rep: Chromosome chr11 scaffold_14, whole genome shotgun sequence - Vitis vinifera (Grape), partial (49%)
	bpe-miR156a-5p.CC	TGACAGAAGAGAGTGAGCACCC	TC170313	1	1	22	43	64	UGACAGAAGAGAGUGAGCACCC	:::::: :::::::::::::	UUGUGCUCUCUCUCUUCUGUCA	Cleavage
	bpe-miR156a-5p.CC	TGACAGAAGAGAGTGAGCACCC	TC159682	1	1	22	40	61	UGACAGAAGAGAGUGAGCACCC	:::::: :::::::::::::	UCGUGCUCUCUCUCUUCUGUCA	Cleavage	similar to UniRef100_A7PFE5 Cluster: Chromosome chr11 scaffold_14, whole genome shotgun sequence; n=1; Vitis vinifera|Rep: Chromosome chr11 scaffold_14, whole genome shotgun sequence - Vitis vinifera (Grape), partial (6%)
	bpe-miR156a-5p.CC	TGACAGAAGAGAGTGAGCACCC	CN523533	1	1	22	536	557	UGACAGAAGAGAGUGAGCACCC	:::::: :::::::::::::	UCGUGCUCUCUCUCUUCUGUCA	Cleavage	homologue to UniRef100_A2YGR5 Cluster: Squamosa promoter-binding-like protein 12; n=1; Oryza sativa Indica Group|Rep: Squamosa promoter-binding-like protein 12 - Oryza sativa subsp. indica (Rice), partial (13%)
	bpe-miR156a-5p.CC	TGACAGAAGAGAGTGAGCACCC	TC162283	1	1	22	190	211	UGACAGAAGAGAGUGAGCACCC	:::::: :::::::::::::	UCGUGCUCUCUCUCUUCUGUCA	Cleavage	similar to UniRef100_A7PFE5 Cluster: Chromosome chr11 scaffold_14, whole genome shotgun sequence; n=1; Vitis vinifera|Rep: Chromosome chr11 scaffold_14, whole genome shotgun sequence - Vitis vinifera (Grape), partial (6%)
	bpe-miR156a-5p.CC	TGACAGAAGAGAGTGAGCACCC	TC139619	1	1	22	119	140	UGACAGAAGAGAGUGAGCACCC	:::::: :::::::::::::	CUGUGCUCUCUCUCUUCUGUCA	Cleavage	similar to UniRef100_Q94JW8 Cluster: Squamosa promoter-binding-like protein 6; n=1; Arabidopsis thaliana|Rep: Squamosa promoter-binding-like protein 6 - Arabidopsis thaliana (Mouse-ear cress), partial (9%)
	bpe-miR156a-5p.CC	TGACAGAAGAGAGTGAGCACCC	TC140194	1	1	22	389	410	UGACAGAAGAGAGUGAGCACCC	:::::: :::::::::::::	AUGUGCUCUCUCUCUUCUGUCA	Cleavage	similar to UniRef100_A7PKG5 Cluster: Chromosome chr15 scaffold_19, whole genome shotgun sequence; n=1; Vitis vinifera|Rep: Chromosome chr15 scaffold_19, whole genome shotgun sequence - Vitis vinifera (Grape), partial (67%)
	bpe-miR156a-5p.CC	TGACAGAAGAGAGTGAGCACCC	TC161130	1	1	22	421	442	UGACAGAAGAGAGUGAGCACCC	:::::: :::::::::::::	CUGUGCUCUCUCUCUUCUGUCA	Cleavage	similar to UniRef100_Q94JW8 Cluster: Squamosa promoter-binding-like protein 6; n=1; Arabidopsis thaliana|Rep: Squamosa promoter-binding-like protein 6 - Arabidopsis thaliana (Mouse-ear cress), partial (12%)
	bpe-miR156a-5p.CC	TGACAGAAGAGAGTGAGCACCC	TC188289	1	1	22	479	500	UGACAGAAGAGAGUGAGCACCC	:::::: :::::::::::::	UCGUGCUCUCUCUCUUCUGUCA	Cleavage	similar to UniRef100_A7PFE5 Cluster: Chromosome chr11 scaffold_14, whole genome shotgun sequence; n=1; Vitis vinifera|Rep: Chromosome chr11 scaffold_14, whole genome shotgun sequence - Vitis vinifera (Grape), partial (13%)
	bpe-miR156a-5p.CC	TGACAGAAGAGAGTGAGCACCC	TC179932	1	1	22	830	851	UGACAGAAGAGAGUGAGCACCC	:::::: :::::::::::::	CCGUGCUCUCUCUCUUCUGUCA	Cleavage	similar to UniRef100_A7QP31 Cluster: Chromosome chr1 scaffold_136, whole genome shotgun sequence; n=1; Vitis vinifera|Rep: Chromosome chr1 scaffold_136, whole genome shotgun sequence - Vitis vinifera (Grape), partial (53%)
	bpe-miR156a-5p.CC	TGACAGAAGAGAGTGAGCACCC	TC155685	1	1	22	1160	1181	UGACAGAAGAGAGUGAGCACCC	:::::: :::::::::::::	UUGUGCUCUCUCUCUUCUGUCA	Cleavage	similar to UniRef100_Q6YZE8 Cluster: Squamosa promoter-binding-like protein 16; n=1; Oryza sativa Japonica Group|Rep: Squamosa promoter-binding-like protein 16 - Oryza sativa subsp. japonica (Rice), partial (24%)
	bpe-miR156a-5p.CC	TGACAGAAGAGAGTGAGCACCC	TC150948	1	1	22	340	361	UGACAGAAGAGAGUGAGCACCC	:::::: :::::::::::::	UCGUGCUCUCUCUCUUCUGUCA	Cleavage	similar to UniRef100_A7PFE5 Cluster: Chromosome chr11 scaffold_14, whole genome shotgun sequence; n=1; Vitis vinifera|Rep: Chromosome chr11 scaffold_14, whole genome shotgun sequence - Vitis vinifera (Grape), partial (10%)
	bpe-miR156a-5p.CC	TGACAGAAGAGAGTGAGCACCC	TC183825	1	1	22	399	420	UGACAGAAGAGAGUGAGCACCC	:::::: :::::::::::::	UCGUGCUCUCUCUCUUCUGUCA	Cleavage	similar to UniRef100_A7PFE5 Cluster: Chromosome chr11 scaffold_14, whole genome shotgun sequence; n=1; Vitis vinifera|Rep: Chromosome chr11 scaffold_14, whole genome shotgun sequence - Vitis vinifera (Grape), partial (11%)
	bpe-miR156a-5p.CC	TGACAGAAGAGAGTGAGCACCC	TC140316	1	1	22	1076	1097	UGACAGAAGAGAGUGAGCACCC	:::::: :::::::::::::	AUGUGCUCUCUCUCUUCUGUCA	Cleavage	similar to UniRef100_A7PKG5 Cluster: Chromosome chr15 scaffold_19, whole genome shotgun sequence; n=1; Vitis vinifera|Rep: Chromosome chr15 scaffold_19, whole genome shotgun sequence - Vitis vinifera (Grape), partial (72%)
	bpe-miR156a-5p.CC	TGACAGAAGAGAGTGAGCACCC	TC156238	1	1	22	626	647	UGACAGAAGAGAGUGAGCACCC	::::: :::::::::::::	GCAUGCUCUCUCUCUUCUGUCA	Cleavage	similar to UniRef100_A7QPU0 Cluster: Chromosome chr10 scaffold_138, whole genome shotgun sequence; n=1; Vitis vinifera|Rep: Chromosome chr10 scaffold_138, whole genome shotgun sequence - Vitis vinifera (Grape), partial (69%)
	bpe-miR156a-5p.CC	TGACAGAAGAGAGTGAGCACCC	TC143610	1	1	22	617	638	UGACAGAAGAGAGUGAGCACCC	::::: :::::::::::::	GCAUGCUCUCUCUCUUCUGUCA	Cleavage	similar to UniRef100_P93015 Cluster: Squamosa promoter-binding-like protein 3; n=1; Arabidopsis thaliana|Rep: Squamosa promoter-binding-like protein 3 - Arabidopsis thaliana (Mouse-ear cress), partial (70%)
	bpe-miR156a-5p.CC	TGACAGAAGAGAGTGAGCACCC	TC140187	1	1	22	725	746	UGACAGAAGAGAGUGAGCACCC	::::: :::::::::::::	CCAUGCUCUCUCUCUUCUGUCA	Cleavage	similar to UniRef100_Q84JE4 Cluster: Squamosa promoter binding like-protein; n=1; Betula pendula|Rep: Squamosa promoter binding like-protein - Betula verrucosa (White birch) (Betula pendula), partial (80%)
	bpe-miR156a-5p.CC	TGACAGAAGAGAGTGAGCACCC	TC156260	1	1	22	644	665	UGACAGAAGAGAGUGAGCACCC	::::: :::::::::::::	GCAUGCUCCCUCUCUUCUGUCA	Cleavage	weakly similar to UniRef100_A7QPU0 Cluster: Chromosome chr10 scaffold_138, whole genome shotgun sequence; n=1; Vitis vinifera|Rep: Chromosome chr10 scaffold_138, whole genome shotgun sequence - Vitis vinifera (Grape), partial (78%)
	bpe-miR156a-5p.CC	TGACAGAAGAGAGTGAGCACCC	TC167753	1	1	22	636	657	UGACAGAAGAGAGUGAGCACCC	::::: :::::::::::::	GCAUGCUCCCUCUCUUCUGUCA	Cleavage	similar to UniRef100_Q5U8L4 Cluster: SBP transcription factor; n=1; Gossypium hirsutum|Rep: SBP transcription factor - Gossypium hirsutum (Upland cotton) (Gossypium mexicanum), partial (70%)
	bpe-miR156a-5p.CC	TGACAGAAGAGAGTGAGCACCC	TC138639	1	1	22	679	700	UGACAGAAGAGAGUGAGCACCC	::::: :::::::::::::	GAUUGCUCUCUCUCUUCUGUCA	Cleavage	similar to UniRef100_A7PJ70 Cluster: Chromosome chr12 scaffold_18, whole genome shotgun sequence; n=1; Vitis vinifera|Rep: Chromosome chr12 scaffold_18, whole genome shotgun sequence - Vitis vinifera (Grape), partial (70%)
	bpe-miR156a-5p.CC	TGACAGAAGAGAGTGAGCACCC	TC183201	1	1	22	903	924	UGACAGAAGAGAGUGAGCACCC	::::: :::::::::::::	GAUUGCUCUCUCUCUUCUGUCA	Cleavage	similar to UniRef100_Q52UU1 Cluster: Squamosa promoter binding-like protein; n=1; Betula platyphylla|Rep: Squamosa promoter binding-like protein - Betula platyphylla, partial (74%)
	bpe-miR156a-5p.CC	TGACAGAAGAGAGTGAGCACCC	TC181875	1	1	22	978	999	UGACAGAAGAGAGUGAGCACCC	::::: :::::::::::::	GAUUGCUCUCUCUCUUCUGUCA	Cleavage	homologue to UniRef100_Q96035 Cluster: Cytochrome oxidase subunit 3; n=1; Magnolia grandiflora|Rep: Cytochrome oxidase subunit 3 - Magnolia grandiflora (Southern magnolia), partial (69%)
	bpe-miR156a-5p.CC	TGACAGAAGAGAGTGAGCACCC	TC159843	2	1	22	30	51	UGACAGAAGAGAGUGAGCACCC	: ::::. :::::::.:::::	UGAUGCUUCCUCUCUUUUGUCA	Cleavage	similar to UniRef100_P93484 Cluster: Vacuolar-sorting receptor 1 precursor; n=1; Pisum sativum|Rep: Vacuolar-sorting receptor 1 precursor - Pisum sativum (Garden pea), partial (31%)
	bpe-miR156a-5p.CC	TGACAGAAGAGAGTGAGCACCC	TC138813	2.5	1	22	38	59	UGACAGAAGAGAGUGAGCACCC	:::::::::.:::::::	UAAAGCUCACUCUUUUCUGUCC	Cleavage	UniRef100_Q7EUR6 Cluster: AT4g05320/C17L7_240; n=8; core eudicotyledons|Rep: AT4g05320/C17L7_240 - Arabidopsis thaliana (Mouse-ear cress), partial (80%)
	bpe-miR156a-5p.CC	TGACAGAAGAGAGTGAGCACCC	TC146251	2.5	1	22	792	813	UGACAGAAGAGAGUGAGCACCC	:::..::.::::::::::	AUUAGCUUGCUUUCUUCUGUCA	Cleavage	similar to UniRef100_A7QQJ3 Cluster: Chromosome undetermined scaffold_143, whole genome shotgun sequence; n=1; Vitis vinifera|Rep: Chromosome undetermined scaffold_143, whole genome shotgun sequence - Vitis vinifera (Grape), partial (51%)
	bpe-miR156a-5p.CC	TGACAGAAGAGAGTGAGCACCC	TC154785	2.5	1	22	63	84	UGACAGAAGAGAGUGAGCACCC	:::::.::::::::: :.:	CACUGCUCGCUCUCUUCUCUUA	Cleavage	similar to UniRef100_Q2HRW5 Cluster: Syntaxin, N-terminal; n=1; Medicago truncatula|Rep: Syntaxin, N-terminal - Medicago truncatula (Barrel medic), partial (77%)
	bpe-miR156a-5p.CC	TGACAGAAGAGAGTGAGCACCC	TC167513	2.5	1	22	257	278	UGACAGAAGAGAGUGAGCACCC	:::::::::::::.: :.:	UUCUGCUCACUCUCUUUUUUUA	Cleavage	similar to UniRef100_Q9XGI4 Cluster: Cyclin A2; n=1; Solanum lycopersicum|Rep: Cyclin A2 - Solanum lycopersicum (Tomato) (Lycopersicon esculentum), partial (20%)
	bpe-miR156a-5p.CC	TGACAGAAGAGAGTGAGCACCC	TC162499	2.5	1	22	9	30	UGACAGAAGAGAGUGAGCACCC	: ::: :::::::.:::::	UCUUCCUCUCUCUCUUUUGUCA	Cleavage	similar to UniRef100_Q3E7D0 Cluster: Nucleobase-ascorbate transporter 12; n=3; Arabidopsis thaliana|Rep: Nucleobase-ascorbate transporter 12 - Arabidopsis thaliana (Mouse-ear cress), partial (8%)
	bpe-miR156a-5p.CC	TGACAGAAGAGAGTGAGCACCC	AJ407505	3	1	22	247	267	UGACAGAAGAGAGUGAGCACCC	::::::::::::::: ::::	CUGUGCUCACUCUCUUC-GUCA	Cleavage	UniRef100_A7PEL7 Cluster: Chromosome chr11 scaffold_13 whole genome shotgun sequence; n=1; Vitis vinifera|Rep:, partial (1%)
	bpe-miR156a-5p.CC	TGACAGAAGAGAGTGAGCACCC	TC179911	3	1	22	450	471	UGACAGAAGAGAGUGAGCACCC	::::::.::::::::.:	CUAGACUCACUUUCUUCUGUUA	Cleavage	similar to UniRef100_Q6W2J5 Cluster: VDAC1.1; n=1; Lotus japonicus|Rep: VDAC1.1 - Lotus japonicus, partial (37%)
	bpe-miR156a-5p.CC	TGACAGAAGAGAGTGAGCACCC	TC145461	3	1	22	1020	1041	UGACAGAAGAGAGUGAGCACCC	::::::.::::::::.:	CUNNNCUCACUUUCUUCUGUUA	Cleavage	similar to UniRef100_Q6W2J5 Cluster: VDAC1.1; n=1; Lotus japonicus|Rep: VDAC1.1 - Lotus japonicus, complete
	bpe-miR156a-5p.CC	TGACAGAAGAGAGTGAGCACCC	TC140389	3	1	22	1023	1044	UGACAGAAGAGAGUGAGCACCC	::::::.::::::::.:	CUAGACUCACUUUCUUCUGUUA	Cleavage	similar to UniRef100_Q6W2J5 Cluster: VDAC1.1; n=1; Lotus japonicus|Rep: VDAC1.1 - Lotus japonicus, partial (98%)
	bpe-miR156a-5p.CC	TGACAGAAGAGAGTGAGCACCC	TC180503	3	1	22	246	267	UGACAGAAGAGAGUGAGCACCC	::.::..:.:::::::::	UCCUGUUCGUUUUCUUCUGUCC	Cleavage	weakly similar to UniRef100_A4BRK1 Cluster: Probable transporter; n=1; Nitrococcus mobilis Nb-231|Rep: Probable transporter - Nitrococcus mobilis Nb-231, partial (5%)
	bpe-miR156a-5p.CC	TGACAGAAGAGAGTGAGCACCC	TC156083	3	1	22	17	38	UGACAGAAGAGAGUGAGCACCC	:::::::.:::::: :::	CAAAGCUCACUUUCUUCUUUCA	Cleavage	weakly similar to UniRef100_Q84Q77 Cluster: 17.4 kDa class I heat shock protein 3; n=3; Oryza sativa|Rep: 17.4 kDa class I heat shock protein 3 - Oryza sativa subsp. japonica (Rice), partial (42%)
	bpe-miR156a-5p.CC	TGACAGAAGAGAGTGAGCACCC	TC157471	3	1	22	140	161	UGACAGAAGAGAGUGAGCACCC	:::::::.:::::: :::	CAAAGCUCACUUUCUUCUUUCA	Cleavage
	bpe-miR156a-5p.CC	TGACAGAAGAGAGTGAGCACCC	TC170385	3	1	22	144	165	UGACAGAAGAGAGUGAGCACCC	::::..::::::::: :.:	UCCUGCUUGCUCUCUUCUCUUA	Cleavage	homologue to UniRef100_A9V995 Cluster: Predicted protein; n=1; Monosiga brevicollis MX1|Rep: Predicted protein - Monosiga brevicollis MX1, partial (15%)
	bpe-miR156a-5p.CC	TGACAGAAGAGAGTGAGCACCC	TC147463	3	1	22	152	173	UGACAGAAGAGAGUGAGCACCC	::::..::::::::: :.:	UUCUGCUUGCUCUCUUCUAUUA	Cleavage	similar to UniRef100_A3IAY7 Cluster: Nitrogen fixation protein; n=1; Bacillus sp. B14905|Rep: Nitrogen fixation protein - Bacillus sp. B14905, partial (19%)
	bpe-miR156a-5p.CC	TGACAGAAGAGAGTGAGCACCC	DT469891	3	1	22	663	684	UGACAGAAGAGAGUGAGCACCC	::.:.:.:.:.::::::.:	GCAUGUUUAUUUUUUUCUGUUA	Cleavage	UniRef100_A7RQ83 Cluster: Predicted protein; n=1; Nematostella vectensis|Rep: Predicted protein - Nematostella vectensis (Starlet sea anemone), partial (12%)
	bpe-miR156a-5p.CC	TGACAGAAGAGAGTGAGCACCC	TC179956	3	1	22	1291	1312	UGACAGAAGAGAGUGAGCACCC	::::::::. :::.:::.:	UUCUGCUCACUUGCUUUUGUUA	Translation	similar to UniRef100_A7NUJ3 Cluster: Chromosome chr18 scaffold_1, whole genome shotgun sequence; n=1; Vitis vinifera|Rep: Chromosome chr18 scaffold_1, whole genome shotgun sequence - Vitis vinifera (Grape), partial (49%)
	bpe-miR156a-5p.CC	TGACAGAAGAGAGTGAGCACCC	TC181170	3	1	22	1437	1458	UGACAGAAGAGAGUGAGCACCC	::::..::::.:::::: :	GAUUGCUUGCUCUUUUCUGUAA	Cleavage	similar to UniRef100_A7NUV0 Cluster: Chromosome chr18 scaffold_1, whole genome shotgun sequence; n=1; Vitis vinifera|Rep: Chromosome chr18 scaffold_1, whole genome shotgun sequence - Vitis vinifera (Grape), partial (90%)
	bpe-miR156a-5p.CC	TGACAGAAGAGAGTGAGCACCC	DB876395	3	1	22	30	51	UGACAGAAGAGAGUGAGCACCC	::.:: ::::::::: :::	GUCUGUUCUCUCUCUUCUCUCA	Cleavage	similar to UniRef100_Q5BJ88 Cluster: Wasf1 protein; n=1; Xenopus tropicalis|Rep: Wasf1 protein - Xenopus tropicalis (Western clawed frog) (Silurana tropicalis), partial (5%)
	bpe-miR156a-5p.CC	TGACAGAAGAGAGTGAGCACCC	TC171875	3	1	19	1	19	UGACAGAAGAGAGUGAGCA	: ::.:: :::::::::::	UACUUACACUCUUCUGUCA	Cleavage	homologue to UniRef100_A7QDX2 Cluster: Chromosome chr4 scaffold_83, whole genome shotgun sequence; n=1; Vitis vinifera|Rep: Chromosome chr4 scaffold_83, whole genome shotgun sequence - Vitis vinifera (Grape), partial (23%)
	bpe-miR156a-5p.Cs	CTGACAGAAGAGAGTGAGCAC	TC139619	1	1	21	121	141	CUGACAGAAGAGAGUGAGCAC	:::::: ::::::::::::::	GUGCUCUCUCUCUUCUGUCAG	Cleavage	similar to UniRef100_Q94JW8 Cluster: Squamosa promoter-binding-like protein 6; n=1; Arabidopsis thaliana|Rep: Squamosa promoter-binding-like protein 6 - Arabidopsis thaliana (Mouse-ear cress), partial (9%)
	bpe-miR156a-5p.Cs	CTGACAGAAGAGAGTGAGCAC	TC161130	1	1	21	423	443	CUGACAGAAGAGAGUGAGCAC	:::::: ::::::::::::::	GUGCUCUCUCUCUUCUGUCAG	Cleavage	similar to UniRef100_Q94JW8 Cluster: Squamosa promoter-binding-like protein 6; n=1; Arabidopsis thaliana|Rep: Squamosa promoter-binding-like protein 6 - Arabidopsis thaliana (Mouse-ear cress), partial (12%)
	bpe-miR156a-5p.Cs	CTGACAGAAGAGAGTGAGCAC	TC170313	2	1	21	45	65	CUGACAGAAGAGAGUGAGCAC	:::::: :::::::::::::	GUGCUCUCUCUCUUCUGUCAU	Cleavage
	bpe-miR156a-5p.Cs	CTGACAGAAGAGAGTGAGCAC	TC159682	2	1	21	42	62	CUGACAGAAGAGAGUGAGCAC	:::::: :::::::::::::	GUGCUCUCUCUCUUCUGUCAA	Cleavage	similar to UniRef100_A7PFE5 Cluster: Chromosome chr11 scaffold_14, whole genome shotgun sequence; n=1; Vitis vinifera|Rep: Chromosome chr11 scaffold_14, whole genome shotgun sequence - Vitis vinifera (Grape), partial (6%)
	bpe-miR156a-5p.Cs	CTGACAGAAGAGAGTGAGCAC	CN523533	2	1	21	538	558	CUGACAGAAGAGAGUGAGCAC	:::::: :::::::::::::	GUGCUCUCUCUCUUCUGUCAA	Cleavage	homologue to UniRef100_A2YGR5 Cluster: Squamosa promoter-binding-like protein 12; n=1; Oryza sativa Indica Group|Rep: Squamosa promoter-binding-like protein 12 - Oryza sativa subsp. indica (Rice), partial (13%)
	bpe-miR156a-5p.Cs	CTGACAGAAGAGAGTGAGCAC	TC162283	2	1	21	192	212	CUGACAGAAGAGAGUGAGCAC	:::::: :::::::::::::	GUGCUCUCUCUCUUCUGUCAA	Cleavage	similar to UniRef100_A7PFE5 Cluster: Chromosome chr11 scaffold_14, whole genome shotgun sequence; n=1; Vitis vinifera|Rep: Chromosome chr11 scaffold_14, whole genome shotgun sequence - Vitis vinifera (Grape), partial (6%)
	bpe-miR156a-5p.Cs	CTGACAGAAGAGAGTGAGCAC	TC140194	2	1	21	391	411	CUGACAGAAGAGAGUGAGCAC	:::::: :::::::::::::	GUGCUCUCUCUCUUCUGUCAU	Cleavage	similar to UniRef100_A7PKG5 Cluster: Chromosome chr15 scaffold_19, whole genome shotgun sequence; n=1; Vitis vinifera|Rep: Chromosome chr15 scaffold_19, whole genome shotgun sequence - Vitis vinifera (Grape), partial (67%)
	bpe-miR156a-5p.Cs	CTGACAGAAGAGAGTGAGCAC	TC188289	2	1	21	481	501	CUGACAGAAGAGAGUGAGCAC	:::::: :::::::::::::	GUGCUCUCUCUCUUCUGUCAA	Cleavage	similar to UniRef100_A7PFE5 Cluster: Chromosome chr11 scaffold_14, whole genome shotgun sequence; n=1; Vitis vinifera|Rep: Chromosome chr11 scaffold_14, whole genome shotgun sequence - Vitis vinifera (Grape), partial (13%)
	bpe-miR156a-5p.Cs	CTGACAGAAGAGAGTGAGCAC	TC179932	2	1	21	832	852	CUGACAGAAGAGAGUGAGCAC	:::::: :::::::::::::	GUGCUCUCUCUCUUCUGUCAU	Cleavage	similar to UniRef100_A7QP31 Cluster: Chromosome chr1 scaffold_136, whole genome shotgun sequence; n=1; Vitis vinifera|Rep: Chromosome chr1 scaffold_136, whole genome shotgun sequence - Vitis vinifera (Grape), partial (53%)
	bpe-miR156a-5p.Cs	CTGACAGAAGAGAGTGAGCAC	TC155685	2	1	21	1162	1182	CUGACAGAAGAGAGUGAGCAC	:::::: :::::::::::::	GUGCUCUCUCUCUUCUGUCAU	Cleavage	similar to UniRef100_Q6YZE8 Cluster: Squamosa promoter-binding-like protein 16; n=1; Oryza sativa Japonica Group|Rep: Squamosa promoter-binding-like protein 16 - Oryza sativa subsp. japonica (Rice), partial (24%)
	bpe-miR156a-5p.Cs	CTGACAGAAGAGAGTGAGCAC	TC150948	2	1	21	342	362	CUGACAGAAGAGAGUGAGCAC	:::::: :::::::::::::	GUGCUCUCUCUCUUCUGUCAA	Cleavage	similar to UniRef100_A7PFE5 Cluster: Chromosome chr11 scaffold_14, whole genome shotgun sequence; n=1; Vitis vinifera|Rep: Chromosome chr11 scaffold_14, whole genome shotgun sequence - Vitis vinifera (Grape), partial (10%)
	bpe-miR156a-5p.Cs	CTGACAGAAGAGAGTGAGCAC	TC158039	2	1	21	696	716	CUGACAGAAGAGAGUGAGCAC	:::::: :::::::::::::	GUGCUCUCUCUCUUCUGUCAA	Cleavage	similar to UniRef100_A7PFE5 Cluster: Chromosome chr11 scaffold_14, whole genome shotgun sequence; n=1; Vitis vinifera|Rep: Chromosome chr11 scaffold_14, whole genome shotgun sequence - Vitis vinifera (Grape), partial (49%)
	bpe-miR156a-5p.Cs	CTGACAGAAGAGAGTGAGCAC	TC183825	2	1	21	401	421	CUGACAGAAGAGAGUGAGCAC	:::::: :::::::::::::	GUGCUCUCUCUCUUCUGUCAA	Cleavage	similar to UniRef100_A7PFE5 Cluster: Chromosome chr11 scaffold_14, whole genome shotgun sequence; n=1; Vitis vinifera|Rep: Chromosome chr11 scaffold_14, whole genome shotgun sequence - Vitis vinifera (Grape), partial (11%)
	bpe-miR156a-5p.Cs	CTGACAGAAGAGAGTGAGCAC	TC140316	2	1	21	1078	1098	CUGACAGAAGAGAGUGAGCAC	:::::: :::::::::::::	GUGCUCUCUCUCUUCUGUCAU	Cleavage	similar to UniRef100_A7PKG5 Cluster: Chromosome chr15 scaffold_19, whole genome shotgun sequence; n=1; Vitis vinifera|Rep: Chromosome chr15 scaffold_19, whole genome shotgun sequence - Vitis vinifera (Grape), partial (72%)
	bpe-miR156a-5p.Cs	CTGACAGAAGAGAGTGAGCAC	TC156238	2	1	21	628	648	CUGACAGAAGAGAGUGAGCAC	::::: :::::::::::::	AUGCUCUCUCUCUUCUGUCAA	Cleavage	similar to UniRef100_A7QPU0 Cluster: Chromosome chr10 scaffold_138, whole genome shotgun sequence; n=1; Vitis vinifera|Rep: Chromosome chr10 scaffold_138, whole genome shotgun sequence - Vitis vinifera (Grape), partial (69%)
	bpe-miR156a-5p.Cs	CTGACAGAAGAGAGTGAGCAC	TC143610	2	1	21	619	639	CUGACAGAAGAGAGUGAGCAC	::::: :::::::::::::	AUGCUCUCUCUCUUCUGUCAA	Cleavage	similar to UniRef100_P93015 Cluster: Squamosa promoter-binding-like protein 3; n=1; Arabidopsis thaliana|Rep: Squamosa promoter-binding-like protein 3 - Arabidopsis thaliana (Mouse-ear cress), partial (70%)
	bpe-miR156a-5p.Cs	CTGACAGAAGAGAGTGAGCAC	TC140187	2	1	21	727	747	CUGACAGAAGAGAGUGAGCAC	::::: :::::::::::::	AUGCUCUCUCUCUUCUGUCAA	Cleavage	similar to UniRef100_Q84JE4 Cluster: Squamosa promoter binding like-protein; n=1; Betula pendula|Rep: Squamosa promoter binding like-protein - Betula verrucosa (White birch) (Betula pendula), partial (80%)
	bpe-miR156a-5p.Cs	CTGACAGAAGAGAGTGAGCAC	TC156260	2	1	21	646	666	CUGACAGAAGAGAGUGAGCAC	::::: :::::::::::::	AUGCUCCCUCUCUUCUGUCAA	Cleavage	weakly similar to UniRef100_A7QPU0 Cluster: Chromosome chr10 scaffold_138, whole genome shotgun sequence; n=1; Vitis vinifera|Rep: Chromosome chr10 scaffold_138, whole genome shotgun sequence - Vitis vinifera (Grape), partial (78%)
	bpe-miR156a-5p.Cs	CTGACAGAAGAGAGTGAGCAC	TC167753	2	1	21	638	658	CUGACAGAAGAGAGUGAGCAC	::::: :::::::::::::	AUGCUCCCUCUCUUCUGUCAA	Cleavage	similar to UniRef100_Q5U8L4 Cluster: SBP transcription factor; n=1; Gossypium hirsutum|Rep: SBP transcription factor - Gossypium hirsutum (Upland cotton) (Gossypium mexicanum), partial (70%)
	bpe-miR156a-5p.Cs	CTGACAGAAGAGAGTGAGCAC	TC138639	2	1	21	681	701	CUGACAGAAGAGAGUGAGCAC	::::: :::::::::::::	UUGCUCUCUCUCUUCUGUCAU	Cleavage	similar to UniRef100_A7PJ70 Cluster: Chromosome chr12 scaffold_18, whole genome shotgun sequence; n=1; Vitis vinifera|Rep: Chromosome chr12 scaffold_18, whole genome shotgun sequence - Vitis vinifera (Grape), partial (70%)
	bpe-miR156a-5p.Cs	CTGACAGAAGAGAGTGAGCAC	TC183201	2	1	21	905	925	CUGACAGAAGAGAGUGAGCAC	::::: :::::::::::::	UUGCUCUCUCUCUUCUGUCAU	Cleavage	similar to UniRef100_Q52UU1 Cluster: Squamosa promoter binding-like protein; n=1; Betula platyphylla|Rep: Squamosa promoter binding-like protein - Betula platyphylla, partial (74%)
	bpe-miR156a-5p.Cs	CTGACAGAAGAGAGTGAGCAC	TC181875	2	1	21	980	1000	CUGACAGAAGAGAGUGAGCAC	::::: :::::::::::::	UUGCUCUCUCUCUUCUGUCAU	Cleavage	homologue to UniRef100_Q96035 Cluster: Cytochrome oxidase subunit 3; n=1; Magnolia grandiflora|Rep: Cytochrome oxidase subunit 3 - Magnolia grandiflora (Southern magnolia), partial (69%)
	bpe-miR156a-5p.Cs	CTGACAGAAGAGAGTGAGCAC	TC138813	2	1	21	40	60	CUGACAGAAGAGAGUGAGCAC	:::::::::.::::::: :	AAGCUCACUCUUUUCUGUCCG	Cleavage	UniRef100_Q7EUR6 Cluster: AT4g05320/C17L7_240; n=8; core eudicotyledons|Rep: AT4g05320/C17L7_240 - Arabidopsis thaliana (Mouse-ear cress), partial (80%)
	bpe-miR156a-5p.Cs	CTGACAGAAGAGAGTGAGCAC	TC146251	2.5	1	21	794	814	CUGACAGAAGAGAGUGAGCAC	:::..::.::::::::::	UAGCUUGCUUUCUUCUGUCAA	Cleavage	similar to UniRef100_A7QQJ3 Cluster: Chromosome undetermined scaffold_143, whole genome shotgun sequence; n=1; Vitis vinifera|Rep: Chromosome undetermined scaffold_143, whole genome shotgun sequence - Vitis vinifera (Grape), partial (51%)
	bpe-miR156a-5p.Cs	CTGACAGAAGAGAGTGAGCAC	CV259250	2.5	1	21	397	417	CUGACAGAAGAGAGUGAGCAC	: :. : ::::::::::::::	GCGUCCUCUCUCUUCUGUCAG	Cleavage	similar to UniRef100_A7PNA2 Cluster: Chromosome chr1 scaffold_22, whole genome shotgun sequence; n=1; Vitis vinifera|Rep: Chromosome chr1 scaffold_22, whole genome shotgun sequence - Vitis vinifera (Grape), partial (30%)
	bpe-miR156a-5p.Cs	CTGACAGAAGAGAGTGAGCAC	TC159843	3	1	21	32	52	CUGACAGAAGAGAGUGAGCAC	::::. :::::::.:::::	AUGCUUCCUCUCUUUUGUCAA	Cleavage	similar to UniRef100_P93484 Cluster: Vacuolar-sorting receptor 1 precursor; n=1; Pisum sativum|Rep: Vacuolar-sorting receptor 1 precursor - Pisum sativum (Garden pea), partial (31%)
	bpe-miR156a-5p.Cs	CTGACAGAAGAGAGTGAGCAC	TC179911	3	1	21	452	472	CUGACAGAAGAGAGUGAGCAC	::::::.::::::::.:	AGACUCACUUUCUUCUGUUAU	Cleavage	similar to UniRef100_Q6W2J5 Cluster: VDAC1.1; n=1; Lotus japonicus|Rep: VDAC1.1 - Lotus japonicus, partial (37%)
	bpe-miR156a-5p.Cs	CTGACAGAAGAGAGTGAGCAC	TC145461	3	1	21	1022	1042	CUGACAGAAGAGAGUGAGCAC	::::::.::::::::.:	NNNCUCACUUUCUUCUGUUAU	Cleavage	similar to UniRef100_Q6W2J5 Cluster: VDAC1.1; n=1; Lotus japonicus|Rep: VDAC1.1 - Lotus japonicus, complete
	bpe-miR156a-5p.Cs	CTGACAGAAGAGAGTGAGCAC	TC140389	3	1	21	1025	1045	CUGACAGAAGAGAGUGAGCAC	::::::.::::::::.:	AGACUCACUUUCUUCUGUUAU	Cleavage	similar to UniRef100_Q6W2J5 Cluster: VDAC1.1; n=1; Lotus japonicus|Rep: VDAC1.1 - Lotus japonicus, partial (98%)
	bpe-miR156a-5p.Cs	CTGACAGAAGAGAGTGAGCAC	TC159809	3	1	21	501	521	CUGACAGAAGAGAGUGAGCAC	::..::.::::.::::::	CACCUUGCUUUCUUUUGUCAG	Cleavage
	bpe-miR156a-5p.Cs	CTGACAGAAGAGAGTGAGCAC	TC169082	3	1	21	510	530	CUGACAGAAGAGAGUGAGCAC	::..::.::::.::::::	CACCUUGCUUUCUUUUGUCAG	Cleavage	homologue to UniRef100_Q31FP8 Cluster: Flagellar basal body-associated protein FliL; n=1; Thiomicrospira crunogena XCL-2|Rep: Flagellar basal body-associated protein FliL - Thiomicrospira crunogena (strain XCL-2), partial (6%)
	bpe-miR156a-5p.Cs	CTGACAGAAGAGAGTGAGCAC	TC156083	3	1	21	19	39	CUGACAGAAGAGAGUGAGCAC	:::::::.:::::: :::	AAGCUCACUUUCUUCUUUCAU	Cleavage	weakly similar to UniRef100_Q84Q77 Cluster: 17.4 kDa class I heat shock protein 3; n=3; Oryza sativa|Rep: 17.4 kDa class I heat shock protein 3 - Oryza sativa subsp. japonica (Rice), partial (42%)
	bpe-miR156a-5p.Cs	CTGACAGAAGAGAGTGAGCAC	TC147614	3	1	21	488	508	CUGACAGAAGAGAGUGAGCAC	::..::.::::.::::::	CACCUUGCUUUCUUUUGUCAG	Cleavage	homologue to UniRef100_Q31FP8 Cluster: Flagellar basal body-associated protein FliL; n=1; Thiomicrospira crunogena XCL-2|Rep: Flagellar basal body-associated protein FliL - Thiomicrospira crunogena (strain XCL-2), partial (6%)
	bpe-miR156a-5p.Cs	CTGACAGAAGAGAGTGAGCAC	TC157471	3	1	21	142	162	CUGACAGAAGAGAGUGAGCAC	:::::::.:::::: :::	AAGCUCACUUUCUUCUUUCAU	Cleavage
	bpe-miR156a-5p.Cs	CTGACAGAAGAGAGTGAGCAC	TC170189	3	1	21	56	76	CUGACAGAAGAGAGUGAGCAC	::::.:::::::: ::::	UCUCUCAUUCUCUUCUCUCAG	Cleavage	similar to UniRef100_A7QDY3 Cluster: Chromosome chr4 scaffold_83, whole genome shotgun sequence; n=1; Vitis vinifera|Rep: Chromosome chr4 scaffold_83, whole genome shotgun sequence - Vitis vinifera (Grape), partial (49%)
	bpe-miR156a-5p.Cs	CTGACAGAAGAGAGTGAGCAC	TC142242	3	1	21	553	573	CUGACAGAAGAGAGUGAGCAC	:.::..::::::::: :::	CAGUUCGUUCUCUUCUGCCAG	Cleavage	homologue to UniRef100_Q39834 Cluster: Clathrin heavy chain; n=1; Glycine max|Rep: Clathrin heavy chain - Glycine max (Soybean), partial (20%)
	bpe-miR156a-5p.Cs	CTGACAGAAGAGAGTGAGCAC	TC176385	3	1	21	506	526	CUGACAGAAGAGAGUGAGCAC	: .: ::::::::::::.::	UUUUUAACUCUCUUCUGUUAG	Cleavage	similar to UniRef100_A7PU50 Cluster: Chromosome chr7 scaffold_31, whole genome shotgun sequence; n=1; Vitis vinifera|Rep: Chromosome chr7 scaffold_31, whole genome shotgun sequence - Vitis vinifera (Grape), partial (6%)
	bpe-miR156a-5p.Cs	CTGACAGAAGAGAGTGAGCAC	DB910827	3	1	21	278	298	CUGACAGAAGAGAGUGAGCAC	.:: :::::::::::.::	CCCUUCUCUCUCUUCUGUUAG	Cleavage	similar to UniRef100_A7NZ33 Cluster: Chromosome chr6 scaffold_3, whole genome shotgun sequence; n=1; Vitis vinifera|Rep: Chromosome chr6 scaffold_3, whole genome shotgun sequence - Vitis vinifera (Grape), partial (14%)
	bpe-miR156a-5p.Cs	CTGACAGAAGAGAGTGAGCAC	TC148929	3	1	21	130	150	CUGACAGAAGAGAGUGAGCAC	.::: :::::::::::.:	CCAUUCAAUCUCUUCUGUCGG	Cleavage	similar to UniRef100_A7Q1P7 Cluster: Chromosome chr7 scaffold_44, whole genome shotgun sequence; n=1; Vitis vinifera|Rep: Chromosome chr7 scaffold_44, whole genome shotgun sequence - Vitis vinifera (Grape), partial (69%)
	bpe-miR156a-5p.Cs	CTGACAGAAGAGAGTGAGCAC	DB909086	3	1	21	464	484	CUGACAGAAGAGAGUGAGCAC	:::: ::::.:::: ::::	AGGCUCCCUCUUUUCUUUCAG	Cleavage	similar to UniRef100_A7STE8 Cluster: Predicted protein; n=1; Nematostella vectensis|Rep: Predicted protein - Nematostella vectensis (Starlet sea anemone), partial (15%)
	bpe-miR156a-5p.Cs	CTGACAGAAGAGAGTGAGCAC	TC155372	3	1	21	697	717	CUGACAGAAGAGAGUGAGCAC	:. .::::::::.:::.::	AAGUGUACUCUCUUUUGUUAG	Cleavage	similar to UniRef100_A7QGT6 Cluster: Chromosome chr16 scaffold_94, whole genome shotgun sequence; n=1; Vitis vinifera|Rep: Chromosome chr16 scaffold_94, whole genome shotgun sequence - Vitis vinifera (Grape), partial (33%)
	bpe-miR156a-5p.G	TGACAGAAGAGAGTGAGCACG	TC159682	1	1	21	41	61	UGACAGAAGAGAGUGAGCACG	::::::: :::::::::::::	CGUGCUCUCUCUCUUCUGUCA	Cleavage	similar to UniRef100_A7PFE5 Cluster: Chromosome chr11 scaffold_14, whole genome shotgun sequence; n=1; Vitis vinifera|Rep: Chromosome chr11 scaffold_14, whole genome shotgun sequence - Vitis vinifera (Grape), partial (6%)
	bpe-miR156a-5p.G	TGACAGAAGAGAGTGAGCACG	CN523533	1	1	21	537	557	UGACAGAAGAGAGUGAGCACG	::::::: :::::::::::::	CGUGCUCUCUCUCUUCUGUCA	Cleavage	homologue to UniRef100_A2YGR5 Cluster: Squamosa promoter-binding-like protein 12; n=1; Oryza sativa Indica Group|Rep: Squamosa promoter-binding-like protein 12 - Oryza sativa subsp. indica (Rice), partial (13%)
	bpe-miR156a-5p.G	TGACAGAAGAGAGTGAGCACG	TC162283	1	1	21	191	211	UGACAGAAGAGAGUGAGCACG	::::::: :::::::::::::	CGUGCUCUCUCUCUUCUGUCA	Cleavage	similar to UniRef100_A7PFE5 Cluster: Chromosome chr11 scaffold_14, whole genome shotgun sequence; n=1; Vitis vinifera|Rep: Chromosome chr11 scaffold_14, whole genome shotgun sequence - Vitis vinifera (Grape), partial (6%)
	bpe-miR156a-5p.G	TGACAGAAGAGAGTGAGCACG	TC188289	1	1	21	480	500	UGACAGAAGAGAGUGAGCACG	::::::: :::::::::::::	CGUGCUCUCUCUCUUCUGUCA	Cleavage	similar to UniRef100_A7PFE5 Cluster: Chromosome chr11 scaffold_14, whole genome shotgun sequence; n=1; Vitis vinifera|Rep: Chromosome chr11 scaffold_14, whole genome shotgun sequence - Vitis vinifera (Grape), partial (13%)
	bpe-miR156a-5p.G	TGACAGAAGAGAGTGAGCACG	TC179932	1	1	21	831	851	UGACAGAAGAGAGUGAGCACG	::::::: :::::::::::::	CGUGCUCUCUCUCUUCUGUCA	Cleavage	similar to UniRef100_A7QP31 Cluster: Chromosome chr1 scaffold_136, whole genome shotgun sequence; n=1; Vitis vinifera|Rep: Chromosome chr1 scaffold_136, whole genome shotgun sequence - Vitis vinifera (Grape), partial (53%)
	bpe-miR156a-5p.G	TGACAGAAGAGAGTGAGCACG	TC150948	1	1	21	341	361	UGACAGAAGAGAGUGAGCACG	::::::: :::::::::::::	CGUGCUCUCUCUCUUCUGUCA	Cleavage	similar to UniRef100_A7PFE5 Cluster: Chromosome chr11 scaffold_14, whole genome shotgun sequence; n=1; Vitis vinifera|Rep: Chromosome chr11 scaffold_14, whole genome shotgun sequence - Vitis vinifera (Grape), partial (10%)
	bpe-miR156a-5p.G	TGACAGAAGAGAGTGAGCACG	TC158039	1	1	21	695	715	UGACAGAAGAGAGUGAGCACG	::::::: :::::::::::::	CGUGCUCUCUCUCUUCUGUCA	Cleavage	similar to UniRef100_A7PFE5 Cluster: Chromosome chr11 scaffold_14, whole genome shotgun sequence; n=1; Vitis vinifera|Rep: Chromosome chr11 scaffold_14, whole genome shotgun sequence - Vitis vinifera (Grape), partial (49%)
	bpe-miR156a-5p.G	TGACAGAAGAGAGTGAGCACG	TC183825	1	1	21	400	420	UGACAGAAGAGAGUGAGCACG	::::::: :::::::::::::	CGUGCUCUCUCUCUUCUGUCA	Cleavage	similar to UniRef100_A7PFE5 Cluster: Chromosome chr11 scaffold_14, whole genome shotgun sequence; n=1; Vitis vinifera|Rep: Chromosome chr11 scaffold_14, whole genome shotgun sequence - Vitis vinifera (Grape), partial (11%)
	bpe-miR156a-5p.G	TGACAGAAGAGAGTGAGCACG	TC170313	1	1	21	44	64	UGACAGAAGAGAGUGAGCACG	.:::::: :::::::::::::	UGUGCUCUCUCUCUUCUGUCA	Cleavage
	bpe-miR156a-5p.G	TGACAGAAGAGAGTGAGCACG	TC139619	1	1	21	120	140	UGACAGAAGAGAGUGAGCACG	.:::::: :::::::::::::	UGUGCUCUCUCUCUUCUGUCA	Cleavage	similar to UniRef100_Q94JW8 Cluster: Squamosa promoter-binding-like protein 6; n=1; Arabidopsis thaliana|Rep: Squamosa promoter-binding-like protein 6 - Arabidopsis thaliana (Mouse-ear cress), partial (9%)
	bpe-miR156a-5p.G	TGACAGAAGAGAGTGAGCACG	TC140194	1	1	21	390	410	UGACAGAAGAGAGUGAGCACG	.:::::: :::::::::::::	UGUGCUCUCUCUCUUCUGUCA	Cleavage	similar to UniRef100_A7PKG5 Cluster: Chromosome chr15 scaffold_19, whole genome shotgun sequence; n=1; Vitis vinifera|Rep: Chromosome chr15 scaffold_19, whole genome shotgun sequence - Vitis vinifera (Grape), partial (67%)
	bpe-miR156a-5p.G	TGACAGAAGAGAGTGAGCACG	TC161130	1	1	21	422	442	UGACAGAAGAGAGUGAGCACG	.:::::: :::::::::::::	UGUGCUCUCUCUCUUCUGUCA	Cleavage	similar to UniRef100_Q94JW8 Cluster: Squamosa promoter-binding-like protein 6; n=1; Arabidopsis thaliana|Rep: Squamosa promoter-binding-like protein 6 - Arabidopsis thaliana (Mouse-ear cress), partial (12%)
	bpe-miR156a-5p.G	TGACAGAAGAGAGTGAGCACG	TC155685	1	1	21	1161	1181	UGACAGAAGAGAGUGAGCACG	.:::::: :::::::::::::	UGUGCUCUCUCUCUUCUGUCA	Cleavage	similar to UniRef100_Q6YZE8 Cluster: Squamosa promoter-binding-like protein 16; n=1; Oryza sativa Japonica Group|Rep: Squamosa promoter-binding-like protein 16 - Oryza sativa subsp. japonica (Rice), partial (24%)
	bpe-miR156a-5p.G	TGACAGAAGAGAGTGAGCACG	TC140316	1	1	21	1077	1097	UGACAGAAGAGAGUGAGCACG	.:::::: :::::::::::::	UGUGCUCUCUCUCUUCUGUCA	Cleavage	similar to UniRef100_A7PKG5 Cluster: Chromosome chr15 scaffold_19, whole genome shotgun sequence; n=1; Vitis vinifera|Rep: Chromosome chr15 scaffold_19, whole genome shotgun sequence - Vitis vinifera (Grape), partial (72%)
	bpe-miR156a-5p.G	TGACAGAAGAGAGTGAGCACG	TC156238	1	1	21	627	647	UGACAGAAGAGAGUGAGCACG	: ::::: :::::::::::::	CAUGCUCUCUCUCUUCUGUCA	Cleavage	similar to UniRef100_A7QPU0 Cluster: Chromosome chr10 scaffold_138, whole genome shotgun sequence; n=1; Vitis vinifera|Rep: Chromosome chr10 scaffold_138, whole genome shotgun sequence - Vitis vinifera (Grape), partial (69%)
	bpe-miR156a-5p.G	TGACAGAAGAGAGTGAGCACG	TC143610	1	1	21	618	638	UGACAGAAGAGAGUGAGCACG	: ::::: :::::::::::::	CAUGCUCUCUCUCUUCUGUCA	Cleavage	similar to UniRef100_P93015 Cluster: Squamosa promoter-binding-like protein 3; n=1; Arabidopsis thaliana|Rep: Squamosa promoter-binding-like protein 3 - Arabidopsis thaliana (Mouse-ear cress), partial (70%)
	bpe-miR156a-5p.G	TGACAGAAGAGAGTGAGCACG	TC140187	1	1	21	726	746	UGACAGAAGAGAGUGAGCACG	: ::::: :::::::::::::	CAUGCUCUCUCUCUUCUGUCA	Cleavage	similar to UniRef100_Q84JE4 Cluster: Squamosa promoter binding like-protein; n=1; Betula pendula|Rep: Squamosa promoter binding like-protein - Betula verrucosa (White birch) (Betula pendula), partial (80%)
	bpe-miR156a-5p.G	TGACAGAAGAGAGTGAGCACG	TC156260	1	1	21	645	665	UGACAGAAGAGAGUGAGCACG	: ::::: :::::::::::::	CAUGCUCCCUCUCUUCUGUCA	Cleavage	weakly similar to UniRef100_A7QPU0 Cluster: Chromosome chr10 scaffold_138, whole genome shotgun sequence; n=1; Vitis vinifera|Rep: Chromosome chr10 scaffold_138, whole genome shotgun sequence - Vitis vinifera (Grape), partial (78%)
	bpe-miR156a-5p.G	TGACAGAAGAGAGTGAGCACG	TC167753	1	1	21	637	657	UGACAGAAGAGAGUGAGCACG	: ::::: :::::::::::::	CAUGCUCCCUCUCUUCUGUCA	Cleavage	similar to UniRef100_Q5U8L4 Cluster: SBP transcription factor; n=1; Gossypium hirsutum|Rep: SBP transcription factor - Gossypium hirsutum (Upland cotton) (Gossypium mexicanum), partial (70%)
	bpe-miR156a-5p.G	TGACAGAAGAGAGTGAGCACG	TC138639	1	1	21	680	700	UGACAGAAGAGAGUGAGCACG	::::: :::::::::::::	AUUGCUCUCUCUCUUCUGUCA	Cleavage	similar to UniRef100_A7PJ70 Cluster: Chromosome chr12 scaffold_18, whole genome shotgun sequence; n=1; Vitis vinifera|Rep: Chromosome chr12 scaffold_18, whole genome shotgun sequence - Vitis vinifera (Grape), partial (70%)
	bpe-miR156a-5p.G	TGACAGAAGAGAGTGAGCACG	TC183201	1	1	21	904	924	UGACAGAAGAGAGUGAGCACG	::::: :::::::::::::	AUUGCUCUCUCUCUUCUGUCA	Cleavage	similar to UniRef100_Q52UU1 Cluster: Squamosa promoter binding-like protein; n=1; Betula platyphylla|Rep: Squamosa promoter binding-like protein - Betula platyphylla, partial (74%)
	bpe-miR156a-5p.G	TGACAGAAGAGAGTGAGCACG	TC181875	1	1	21	979	999	UGACAGAAGAGAGUGAGCACG	::::: :::::::::::::	AUUGCUCUCUCUCUUCUGUCA	Cleavage	homologue to UniRef100_Q96035 Cluster: Cytochrome oxidase subunit 3; n=1; Magnolia grandiflora|Rep: Cytochrome oxidase subunit 3 - Magnolia grandiflora (Southern magnolia), partial (69%)
	bpe-miR156a-5p.G	TGACAGAAGAGAGTGAGCACG	TC159843	2	1	21	31	51	UGACAGAAGAGAGUGAGCACG	::::. :::::::.:::::	GAUGCUUCCUCUCUUUUGUCA	Cleavage	similar to UniRef100_P93484 Cluster: Vacuolar-sorting receptor 1 precursor; n=1; Pisum sativum|Rep: Vacuolar-sorting receptor 1 precursor - Pisum sativum (Garden pea), partial (31%)
	bpe-miR156a-5p.G	TGACAGAAGAGAGTGAGCACG	TC138813	2.5	1	21	39	59	UGACAGAAGAGAGUGAGCACG	:::::::::.:::::::	AAAGCUCACUCUUUUCUGUCC	Cleavage	UniRef100_Q7EUR6 Cluster: AT4g05320/C17L7_240; n=8; core eudicotyledons|Rep: AT4g05320/C17L7_240 - Arabidopsis thaliana (Mouse-ear cress), partial (80%)
	bpe-miR156a-5p.G	TGACAGAAGAGAGTGAGCACG	TC146251	2.5	1	21	793	813	UGACAGAAGAGAGUGAGCACG	:::..::.::::::::::	UUAGCUUGCUUUCUUCUGUCA	Cleavage	similar to UniRef100_A7QQJ3 Cluster: Chromosome undetermined scaffold_143, whole genome shotgun sequence; n=1; Vitis vinifera|Rep: Chromosome undetermined scaffold_143, whole genome shotgun sequence - Vitis vinifera (Grape), partial (51%)
	bpe-miR156a-5p.G	TGACAGAAGAGAGTGAGCACG	TC154785	2.5	1	21	64	84	UGACAGAAGAGAGUGAGCACG	:::::.::::::::: :.:	ACUGCUCGCUCUCUUCUCUUA	Cleavage	similar to UniRef100_Q2HRW5 Cluster: Syntaxin, N-terminal; n=1; Medicago truncatula|Rep: Syntaxin, N-terminal - Medicago truncatula (Barrel medic), partial (77%)
	bpe-miR156a-5p.G	TGACAGAAGAGAGTGAGCACG	TC167513	2.5	1	21	258	278	UGACAGAAGAGAGUGAGCACG	:::::::::::::.: :.:	UCUGCUCACUCUCUUUUUUUA	Cleavage	similar to UniRef100_Q9XGI4 Cluster: Cyclin A2; n=1; Solanum lycopersicum|Rep: Cyclin A2 - Solanum lycopersicum (Tomato) (Lycopersicon esculentum), partial (20%)
	bpe-miR156a-5p.G	TGACAGAAGAGAGTGAGCACG	TC162499	2.5	1	21	10	30	UGACAGAAGAGAGUGAGCACG	: : ::: :::::::.:::::	CUUCCUCUCUCUCUUUUGUCA	Cleavage	similar to UniRef100_Q3E7D0 Cluster: Nucleobase-ascorbate transporter 12; n=3; Arabidopsis thaliana|Rep: Nucleobase-ascorbate transporter 12 - Arabidopsis thaliana (Mouse-ear cress), partial (8%)
	bpe-miR156a-5p.G	TGACAGAAGAGAGTGAGCACG	AJ407505	3	1	21	248	267	UGACAGAAGAGAGUGAGCACG	.::::::::::::::: ::::	UGUGCUCACUCUCUUC-GUCA	Cleavage	UniRef100_A7PEL7 Cluster: Chromosome chr11 scaffold_13 whole genome shotgun sequence; n=1; Vitis vinifera|Rep:, partial (1%)
	bpe-miR156a-5p.G	TGACAGAAGAGAGTGAGCACG	TC180503	3	1	21	247	267	UGACAGAAGAGAGUGAGCACG	: ::.::..:.:::::::::	CCUGUUCGUUUUCUUCUGUCC	Cleavage	weakly similar to UniRef100_A4BRK1 Cluster: Probable transporter; n=1; Nitrococcus mobilis Nb-231|Rep: Probable transporter - Nitrococcus mobilis Nb-231, partial (5%)
	bpe-miR156a-5p.G	TGACAGAAGAGAGTGAGCACG	TC179911	3	1	21	451	471	UGACAGAAGAGAGUGAGCACG	::::::.::::::::.:	UAGACUCACUUUCUUCUGUUA	Cleavage	similar to UniRef100_Q6W2J5 Cluster: VDAC1.1; n=1; Lotus japonicus|Rep: VDAC1.1 - Lotus japonicus, partial (37%)
	bpe-miR156a-5p.G	TGACAGAAGAGAGTGAGCACG	TC145461	3	1	21	1021	1041	UGACAGAAGAGAGUGAGCACG	::::::.::::::::.:	UNNNCUCACUUUCUUCUGUUA	Cleavage	similar to UniRef100_Q6W2J5 Cluster: VDAC1.1; n=1; Lotus japonicus|Rep: VDAC1.1 - Lotus japonicus, complete
	bpe-miR156a-5p.G	TGACAGAAGAGAGTGAGCACG	TC140389	3	1	21	1024	1044	UGACAGAAGAGAGUGAGCACG	::::::.::::::::.:	UAGACUCACUUUCUUCUGUUA	Cleavage	similar to UniRef100_Q6W2J5 Cluster: VDAC1.1; n=1; Lotus japonicus|Rep: VDAC1.1 - Lotus japonicus, partial (98%)
	bpe-miR156a-5p.G	TGACAGAAGAGAGTGAGCACG	TC156083	3	1	21	18	38	UGACAGAAGAGAGUGAGCACG	:::::::.:::::: :::	AAAGCUCACUUUCUUCUUUCA	Cleavage	weakly similar to UniRef100_Q84Q77 Cluster: 17.4 kDa class I heat shock protein 3; n=3; Oryza sativa|Rep: 17.4 kDa class I heat shock protein 3 - Oryza sativa subsp. japonica (Rice), partial (42%)
	bpe-miR156a-5p.G	TGACAGAAGAGAGTGAGCACG	TC170385	3	1	21	145	165	UGACAGAAGAGAGUGAGCACG	: ::::..::::::::: :.:	CCUGCUUGCUCUCUUCUCUUA	Cleavage	homologue to UniRef100_A9V995 Cluster: Predicted protein; n=1; Monosiga brevicollis MX1|Rep: Predicted protein - Monosiga brevicollis MX1, partial (15%)
	bpe-miR156a-5p.G	TGACAGAAGAGAGTGAGCACG	TC157471	3	1	21	141	161	UGACAGAAGAGAGUGAGCACG	:::::::.:::::: :::	AAAGCUCACUUUCUUCUUUCA	Cleavage
	bpe-miR156a-5p.G	TGACAGAAGAGAGTGAGCACG	DT469891	3	1	21	664	684	UGACAGAAGAGAGUGAGCACG	: ::.:.:.:.:.::::::.:	CAUGUUUAUUUUUUUCUGUUA	Cleavage	UniRef100_A7RQ83 Cluster: Predicted protein; n=1; Nematostella vectensis|Rep: Predicted protein - Nematostella vectensis (Starlet sea anemone), partial (12%)
	bpe-miR156a-5p.G	TGACAGAAGAGAGTGAGCACG	TC147463	3	1	21	153	173	UGACAGAAGAGAGUGAGCACG	::::..::::::::: :.:	UCUGCUUGCUCUCUUCUAUUA	Cleavage	similar to UniRef100_A3IAY7 Cluster: Nitrogen fixation protein; n=1; Bacillus sp. B14905|Rep: Nitrogen fixation protein - Bacillus sp. B14905, partial (19%)
	bpe-miR156a-5p.G	TGACAGAAGAGAGTGAGCACG	TC179956	3	1	21	1292	1312	UGACAGAAGAGAGUGAGCACG	::::::::. :::.:::.:	UCUGCUCACUUGCUUUUGUUA	Translation	similar to UniRef100_A7NUJ3 Cluster: Chromosome chr18 scaffold_1, whole genome shotgun sequence; n=1; Vitis vinifera|Rep: Chromosome chr18 scaffold_1, whole genome shotgun sequence - Vitis vinifera (Grape), partial (49%)
	bpe-miR156a-5p.G	TGACAGAAGAGAGTGAGCACG	TC181170	3	1	21	1438	1458	UGACAGAAGAGAGUGAGCACG	::::..::::.:::::: :	AUUGCUUGCUCUUUUCUGUAA	Cleavage	similar to UniRef100_A7NUV0 Cluster: Chromosome chr18 scaffold_1, whole genome shotgun sequence; n=1; Vitis vinifera|Rep: Chromosome chr18 scaffold_1, whole genome shotgun sequence - Vitis vinifera (Grape), partial (90%)
	bpe-miR156a-5p.G	TGACAGAAGAGAGTGAGCACG	DB876395	3	1	21	31	51	UGACAGAAGAGAGUGAGCACG	::.:: ::::::::: :::	UCUGUUCUCUCUCUUCUCUCA	Cleavage	similar to UniRef100_Q5BJ88 Cluster: Wasf1 protein; n=1; Xenopus tropicalis|Rep: Wasf1 protein - Xenopus tropicalis (Western clawed frog) (Silurana tropicalis), partial (5%)
	bpe-miR156a-5p.G	TGACAGAAGAGAGTGAGCACG	TC171875	3	1	19	1	19	UGACAGAAGAGAGUGAGCA	: ::.:: :::::::::::	UACUUACACUCUUCUGUCA	Cleavage	homologue to UniRef100_A7QDX2 Cluster: Chromosome chr4 scaffold_83, whole genome shotgun sequence; n=1; Vitis vinifera|Rep: Chromosome chr4 scaffold_83, whole genome shotgun sequence - Vitis vinifera (Grape), partial (23%)
	bpe-miR156a-5p.G	TGACAGAAGAGAGTGAGCACG	TC176385	3	1	21	505	525	UGACAGAAGAGAGUGAGCACG	: .: ::::::::::::.:	AUUUUUAACUCUCUUCUGUUA	Cleavage	similar to UniRef100_A7PU50 Cluster: Chromosome chr7 scaffold_31, whole genome shotgun sequence; n=1; Vitis vinifera|Rep: Chromosome chr7 scaffold_31, whole genome shotgun sequence - Vitis vinifera (Grape), partial (6%)
	bpe-miR156a-5p.G	TGACAGAAGAGAGTGAGCACG	DB880423	3	1	21	84	104	UGACAGAAGAGAGUGAGCACG	: ::. .::::::::::::	UUUUCUUUUUCUCUUCUGUCA	Cleavage	similar to UniRef100_A7PEZ5 Cluster: Chromosome chr11 scaffold_13, whole genome shotgun sequence; n=1; Vitis vinifera|Rep: Chromosome chr11 scaffold_13, whole genome shotgun sequence - Vitis vinifera (Grape), partial (51%)
	bpe-miR156a-5p.G11T	TGACAGAAGATAGTGAGCAC	TC170313	2.5	1	20	45	64	UGACAGAAGAUAGUGAGCAC	:::::: :: ::::::::::	GUGCUCUCUCUCUUCUGUCA	Translation
	bpe-miR156a-5p.G11T	TGACAGAAGATAGTGAGCAC	TC159682	2.5	1	20	42	61	UGACAGAAGAUAGUGAGCAC	:::::: :: ::::::::::	GUGCUCUCUCUCUUCUGUCA	Translation	similar to UniRef100_A7PFE5 Cluster: Chromosome chr11 scaffold_14, whole genome shotgun sequence; n=1; Vitis vinifera|Rep: Chromosome chr11 scaffold_14, whole genome shotgun sequence - Vitis vinifera (Grape), partial (6%)
	bpe-miR156a-5p.G11T	TGACAGAAGATAGTGAGCAC	CN523533	2.5	1	20	538	557	UGACAGAAGAUAGUGAGCAC	:::::: :: ::::::::::	GUGCUCUCUCUCUUCUGUCA	Translation	homologue to UniRef100_A2YGR5 Cluster: Squamosa promoter-binding-like protein 12; n=1; Oryza sativa Indica Group|Rep: Squamosa promoter-binding-like protein 12 - Oryza sativa subsp. indica (Rice), partial (13%)
	bpe-miR156a-5p.G11T	TGACAGAAGATAGTGAGCAC	TC162283	2.5	1	20	192	211	UGACAGAAGAUAGUGAGCAC	:::::: :: ::::::::::	GUGCUCUCUCUCUUCUGUCA	Translation	similar to UniRef100_A7PFE5 Cluster: Chromosome chr11 scaffold_14, whole genome shotgun sequence; n=1; Vitis vinifera|Rep: Chromosome chr11 scaffold_14, whole genome shotgun sequence - Vitis vinifera (Grape), partial (6%)
	bpe-miR156a-5p.G11T	TGACAGAAGATAGTGAGCAC	TC139619	2.5	1	20	121	140	UGACAGAAGAUAGUGAGCAC	:::::: :: ::::::::::	GUGCUCUCUCUCUUCUGUCA	Translation	similar to UniRef100_Q94JW8 Cluster: Squamosa promoter-binding-like protein 6; n=1; Arabidopsis thaliana|Rep: Squamosa promoter-binding-like protein 6 - Arabidopsis thaliana (Mouse-ear cress), partial (9%)
	bpe-miR156a-5p.G11T	TGACAGAAGATAGTGAGCAC	TC140194	2.5	1	20	391	410	UGACAGAAGAUAGUGAGCAC	:::::: :: ::::::::::	GUGCUCUCUCUCUUCUGUCA	Translation	similar to UniRef100_A7PKG5 Cluster: Chromosome chr15 scaffold_19, whole genome shotgun sequence; n=1; Vitis vinifera|Rep: Chromosome chr15 scaffold_19, whole genome shotgun sequence - Vitis vinifera (Grape), partial (67%)
	bpe-miR156a-5p.G11T	TGACAGAAGATAGTGAGCAC	TC161130	2.5	1	20	423	442	UGACAGAAGAUAGUGAGCAC	:::::: :: ::::::::::	GUGCUCUCUCUCUUCUGUCA	Translation	similar to UniRef100_Q94JW8 Cluster: Squamosa promoter-binding-like protein 6; n=1; Arabidopsis thaliana|Rep: Squamosa promoter-binding-like protein 6 - Arabidopsis thaliana (Mouse-ear cress), partial (12%)
	bpe-miR156a-5p.G11T	TGACAGAAGATAGTGAGCAC	TC188289	2.5	1	20	481	500	UGACAGAAGAUAGUGAGCAC	:::::: :: ::::::::::	GUGCUCUCUCUCUUCUGUCA	Translation	similar to UniRef100_A7PFE5 Cluster: Chromosome chr11 scaffold_14, whole genome shotgun sequence; n=1; Vitis vinifera|Rep: Chromosome chr11 scaffold_14, whole genome shotgun sequence - Vitis vinifera (Grape), partial (13%)
	bpe-miR156a-5p.G11T	TGACAGAAGATAGTGAGCAC	TC179932	2.5	1	20	832	851	UGACAGAAGAUAGUGAGCAC	:::::: :: ::::::::::	GUGCUCUCUCUCUUCUGUCA	Translation	similar to UniRef100_A7QP31 Cluster: Chromosome chr1 scaffold_136, whole genome shotgun sequence; n=1; Vitis vinifera|Rep: Chromosome chr1 scaffold_136, whole genome shotgun sequence - Vitis vinifera (Grape), partial (53%)
	bpe-miR156a-5p.G11T	TGACAGAAGATAGTGAGCAC	TC155685	2.5	1	20	1162	1181	UGACAGAAGAUAGUGAGCAC	:::::: :: ::::::::::	GUGCUCUCUCUCUUCUGUCA	Translation	similar to UniRef100_Q6YZE8 Cluster: Squamosa promoter-binding-like protein 16; n=1; Oryza sativa Japonica Group|Rep: Squamosa promoter-binding-like protein 16 - Oryza sativa subsp. japonica (Rice), partial (24%)
	bpe-miR156a-5p.G11T	TGACAGAAGATAGTGAGCAC	TC150948	2.5	1	20	342	361	UGACAGAAGAUAGUGAGCAC	:::::: :: ::::::::::	GUGCUCUCUCUCUUCUGUCA	Translation	similar to UniRef100_A7PFE5 Cluster: Chromosome chr11 scaffold_14, whole genome shotgun sequence; n=1; Vitis vinifera|Rep: Chromosome chr11 scaffold_14, whole genome shotgun sequence - Vitis vinifera (Grape), partial (10%)
	bpe-miR156a-5p.G11T	TGACAGAAGATAGTGAGCAC	TC158039	2.5	1	20	696	715	UGACAGAAGAUAGUGAGCAC	:::::: :: ::::::::::	GUGCUCUCUCUCUUCUGUCA	Translation	similar to UniRef100_A7PFE5 Cluster: Chromosome chr11 scaffold_14, whole genome shotgun sequence; n=1; Vitis vinifera|Rep: Chromosome chr11 scaffold_14, whole genome shotgun sequence - Vitis vinifera (Grape), partial (49%)
	bpe-miR156a-5p.G11T	TGACAGAAGATAGTGAGCAC	TC183825	2.5	1	20	401	420	UGACAGAAGAUAGUGAGCAC	:::::: :: ::::::::::	GUGCUCUCUCUCUUCUGUCA	Translation	similar to UniRef100_A7PFE5 Cluster: Chromosome chr11 scaffold_14, whole genome shotgun sequence; n=1; Vitis vinifera|Rep: Chromosome chr11 scaffold_14, whole genome shotgun sequence - Vitis vinifera (Grape), partial (11%)
	bpe-miR156a-5p.G11T	TGACAGAAGATAGTGAGCAC	TC140316	2.5	1	20	1078	1097	UGACAGAAGAUAGUGAGCAC	:::::: :: ::::::::::	GUGCUCUCUCUCUUCUGUCA	Translation	similar to UniRef100_A7PKG5 Cluster: Chromosome chr15 scaffold_19, whole genome shotgun sequence; n=1; Vitis vinifera|Rep: Chromosome chr15 scaffold_19, whole genome shotgun sequence - Vitis vinifera (Grape), partial (72%)
	bpe-miR156a-5p.G11T	TGACAGAAGATAGTGAGCAC	AJ641550	2.5	1	20	253	272	UGACAGAAGAUAGUGAGCAC	:: ::::::::::.::::	CUGAUCACUAUCUUUUGUCU	Cleavage
	bpe-miR156a-5p.G11T	TGACAGAAGATAGTGAGCAC	TC168736	2.5	1	20	35	54	UGACAGAAGAUAGUGAGCAC	: ::::::.:::::::::	UUUCUCACUGUCUUCUGUCU	Cleavage	similar to UniRef100_A7QQ47 Cluster: Chromosome chr2 scaffold_140, whole genome shotgun sequence; n=1; Vitis vinifera|Rep: Chromosome chr2 scaffold_140, whole genome shotgun sequence - Vitis vinifera (Grape), partial (43%)
	bpe-miR156a-5p.G11T	TGACAGAAGATAGTGAGCAC	TC156238	2.5	1	20	628	647	UGACAGAAGAUAGUGAGCAC	::::: :: ::::::::::	AUGCUCUCUCUCUUCUGUCA	Translation	similar to UniRef100_A7QPU0 Cluster: Chromosome chr10 scaffold_138, whole genome shotgun sequence; n=1; Vitis vinifera|Rep: Chromosome chr10 scaffold_138, whole genome shotgun sequence - Vitis vinifera (Grape), partial (69%)
	bpe-miR156a-5p.G11T	TGACAGAAGATAGTGAGCAC	CN523953	2.5	1	20	86	105	UGACAGAAGAUAGUGAGCAC	: ::..::::.::::::::	CUUCUUGCUAUUUUCUGUCA	Cleavage	similar to UniRef100_A7PC67 Cluster: Chromosome chr2 scaffold_11, whole genome shotgun sequence; n=1; Vitis vinifera|Rep: Chromosome chr2 scaffold_11, whole genome shotgun sequence - Vitis vinifera (Grape), partial (61%)
	bpe-miR156a-5p.G11T	TGACAGAAGATAGTGAGCAC	TC143610	2.5	1	20	619	638	UGACAGAAGAUAGUGAGCAC	::::: :: ::::::::::	AUGCUCUCUCUCUUCUGUCA	Translation	similar to UniRef100_P93015 Cluster: Squamosa promoter-binding-like protein 3; n=1; Arabidopsis thaliana|Rep: Squamosa promoter-binding-like protein 3 - Arabidopsis thaliana (Mouse-ear cress), partial (70%)
	bpe-miR156a-5p.G11T	TGACAGAAGATAGTGAGCAC	TC140187	2.5	1	20	727	746	UGACAGAAGAUAGUGAGCAC	::::: :: ::::::::::	AUGCUCUCUCUCUUCUGUCA	Translation	similar to UniRef100_Q84JE4 Cluster: Squamosa promoter binding like-protein; n=1; Betula pendula|Rep: Squamosa promoter binding like-protein - Betula verrucosa (White birch) (Betula pendula), partial (80%)
	bpe-miR156a-5p.G11T	TGACAGAAGATAGTGAGCAC	TC153290	2.5	1	20	692	711	UGACAGAAGAUAGUGAGCAC	::::. ::.::::::::.:	AUGCUUUCUGUCUUCUGUUA	Cleavage	similar to UniRef100_A7Q1C9 Cluster: Chromosome chr10 scaffold_43, whole genome shotgun sequence; n=1; Vitis vinifera|Rep: Chromosome chr10 scaffold_43, whole genome shotgun sequence - Vitis vinifera (Grape), partial (29%)
	bpe-miR156a-5p.G11T	TGACAGAAGATAGTGAGCAC	TC156260	2.5	1	20	646	665	UGACAGAAGAUAGUGAGCAC	::::: :: ::::::::::	AUGCUCCCUCUCUUCUGUCA	Translation	weakly similar to UniRef100_A7QPU0 Cluster: Chromosome chr10 scaffold_138, whole genome shotgun sequence; n=1; Vitis vinifera|Rep: Chromosome chr10 scaffold_138, whole genome shotgun sequence - Vitis vinifera (Grape), partial (78%)
	bpe-miR156a-5p.G11T	TGACAGAAGATAGTGAGCAC	TC167753	2.5	1	20	638	657	UGACAGAAGAUAGUGAGCAC	::::: :: ::::::::::	AUGCUCCCUCUCUUCUGUCA	Translation	similar to UniRef100_Q5U8L4 Cluster: SBP transcription factor; n=1; Gossypium hirsutum|Rep: SBP transcription factor - Gossypium hirsutum (Upland cotton) (Gossypium mexicanum), partial (70%)
	bpe-miR156a-5p.G11T	TGACAGAAGATAGTGAGCAC	TC138639	2.5	1	20	681	700	UGACAGAAGAUAGUGAGCAC	::::: :: ::::::::::	UUGCUCUCUCUCUUCUGUCA	Translation	similar to UniRef100_A7PJ70 Cluster: Chromosome chr12 scaffold_18, whole genome shotgun sequence; n=1; Vitis vinifera|Rep: Chromosome chr12 scaffold_18, whole genome shotgun sequence - Vitis vinifera (Grape), partial (70%)
	bpe-miR156a-5p.G11T	TGACAGAAGATAGTGAGCAC	TC183201	2.5	1	20	905	924	UGACAGAAGAUAGUGAGCAC	::::: :: ::::::::::	UUGCUCUCUCUCUUCUGUCA	Translation	similar to UniRef100_Q52UU1 Cluster: Squamosa promoter binding-like protein; n=1; Betula platyphylla|Rep: Squamosa promoter binding-like protein - Betula platyphylla, partial (74%)
	bpe-miR156a-5p.G11T	TGACAGAAGATAGTGAGCAC	TC181875	2.5	1	20	980	999	UGACAGAAGAUAGUGAGCAC	::::: :: ::::::::::	UUGCUCUCUCUCUUCUGUCA	Translation	homologue to UniRef100_Q96035 Cluster: Cytochrome oxidase subunit 3; n=1; Magnolia grandiflora|Rep: Cytochrome oxidase subunit 3 - Magnolia grandiflora (Southern magnolia), partial (69%)
	bpe-miR156a-5p.G11T	TGACAGAAGATAGTGAGCAC	TC138744	2.5	1	20	541	560	UGACAGAAGAUAGUGAGCAC	: ::..::::.::::::::	CUUCUUGCUAUUUUCUGUCA	Cleavage	similar to UniRef100_A7PC67 Cluster: Chromosome chr2 scaffold_11, whole genome shotgun sequence; n=1; Vitis vinifera|Rep: Chromosome chr2 scaffold_11, whole genome shotgun sequence - Vitis vinifera (Grape), partial (96%)
	bpe-miR156a-5p.G11T	TGACAGAAGATAGTGAGCAC	CX167722	3	1	20	468	487	UGACAGAAGAUAGUGAGCAC	::.:::::.::::.:::.	CUGUUCACUGUCUUUUGUUU	Cleavage	weakly similar to UniRef100_A7P8N3 Cluster: Chromosome chr3 scaffold_8, whole genome shotgun sequence; n=1; Vitis vinifera|Rep: Chromosome chr3 scaffold_8, whole genome shotgun sequence - Vitis vinifera (Grape), partial (49%)
	bpe-miR156a-5p.G11T	TGACAGAAGATAGTGAGCAC	CV243685	3	1	20	437	456	UGACAGAAGAUAGUGAGCAC	::::::.::::::::: :	AUGCUCAUUAUCUUCUGCCU	Cleavage	weakly similar to UniRef100_A7QFJ2 Cluster: Chromosome chr8 scaffold_88, whole genome shotgun sequence; n=1; Vitis vinifera|Rep: Chromosome chr8 scaffold_88, whole genome shotgun sequence - Vitis vinifera (Grape), partial (59%)
	bpe-miR156a-5p.G11T	TGACAGAAGATAGTGAGCAC	DV466268	3	1	20	562	581	UGACAGAAGAUAGUGAGCAC	::.:::::.::::.:::.	CUGUUCACUGUCUUUUGUUU	Cleavage	weakly similar to UniRef100_A7P8N3 Cluster: Chromosome chr3 scaffold_8, whole genome shotgun sequence; n=1; Vitis vinifera|Rep: Chromosome chr3 scaffold_8, whole genome shotgun sequence - Vitis vinifera (Grape), partial (73%)
	bpe-miR156a-5p.G11T	TGACAGAAGATAGTGAGCAC	CK114310	3	1	20	656	675	UGACAGAAGAUAGUGAGCAC	::::::::: .:::::::	CUGCUCACUACUUUCUGUCU	Translation	homologue to UniRef100_P43322 Cluster: Pro-neuregulin-1 membrane-bound isoform precursor (Pro-NRG1), partial (1%)
	bpe-miR156a-5p.G11T	TGACAGAAGATAGTGAGCAC	DB880563	3	1	20	150	169	UGACAGAAGAUAGUGAGCAC	::::: ::.:::::: :::	UUGCUCUCUGUCUUCUUUCA	Cleavage	weakly similar to UniRef100_Q0IBZ2 Cluster: Transporter, major facilitator family protein; n=1; Synechococcus sp. CC9311|Rep: Transporter, major facilitator family protein - Synechococcus sp. (strain CC9311), partial (6%)
	bpe-miR156a-5p.G11T	TGACAGAAGATAGTGAGCAC	DB904112	3	1	20	124	142	UGACAGAAGAUAGUGAGCAC	:::: .::.::::::::::	CUGCU-GCUGUCUUCUGUCA	Cleavage	UniRef100_Q8YFN3 Cluster: COLICIN V PRODUCTION PROTEIN; n=4; Brucella|Rep: COLICIN V PRODUCTION PROTEIN - Brucella melitensis, partial (7%)
	bpe-miR156a-5p.G13T	TGACAGAAGAGATTGAGCAC	TC149795	2	1	20	337	356	UGACAGAAGAGAUUGAGCAC	:::.:: ::::.::::::::	GUGUUCUAUCUUUUCUGUCA	Cleavage	similar to UniRef100_A7NTH0 Cluster: Chromosome chr18 scaffold_1, whole genome shotgun sequence; n=1; Vitis vinifera|Rep: Chromosome chr18 scaffold_1, whole genome shotgun sequence - Vitis vinifera (Grape), partial (46%)
	bpe-miR156a-5p.G13T	TGACAGAAGAGATTGAGCAC	TC164700	2.5	1	20	126	145	UGACAGAAGAGAUUGAGCAC	:::.:::.:::.:::::::	GUGUUCAGUCUUUUCUGUCC	Cleavage	weakly similar to UniRef100_A7PVY1 Cluster: Chromosome chr8 scaffold_34, whole genome shotgun sequence; n=1; Vitis vinifera|Rep: Chromosome chr8 scaffold_34, whole genome shotgun sequence - Vitis vinifera (Grape), partial (7%)
	bpe-miR156a-5p.G13T	TGACAGAAGAGATTGAGCAC	TC168182	2.5	1	20	965	984	UGACAGAAGAGAUUGAGCAC	:: .:::::::::::::::	GUUUUCAAUCUCUUCUGUCC	Cleavage	similar to UniRef100_A7QYP0 Cluster: Chromosome undetermined scaffold_252, whole genome shotgun sequence; n=1; Vitis vinifera|Rep: Chromosome undetermined scaffold_252, whole genome shotgun sequence - Vitis vinifera (Grape), partial (6%)
	bpe-miR156a-5p.G13T	TGACAGAAGAGATTGAGCAC	TC170313	2.5	1	20	45	64	UGACAGAAGAGAUUGAGCAC	:::::: ::::::::::::	GUGCUCUCUCUCUUCUGUCA	Cleavage
	bpe-miR156a-5p.G13T	TGACAGAAGAGATTGAGCAC	TC159682	2.5	1	20	42	61	UGACAGAAGAGAUUGAGCAC	:::::: ::::::::::::	GUGCUCUCUCUCUUCUGUCA	Cleavage	similar to UniRef100_A7PFE5 Cluster: Chromosome chr11 scaffold_14, whole genome shotgun sequence; n=1; Vitis vinifera|Rep: Chromosome chr11 scaffold_14, whole genome shotgun sequence - Vitis vinifera (Grape), partial (6%)
	bpe-miR156a-5p.G13T	TGACAGAAGAGATTGAGCAC	CN523533	2.5	1	20	538	557	UGACAGAAGAGAUUGAGCAC	:::::: ::::::::::::	GUGCUCUCUCUCUUCUGUCA	Cleavage	homologue to UniRef100_A2YGR5 Cluster: Squamosa promoter-binding-like protein 12; n=1; Oryza sativa Indica Group|Rep: Squamosa promoter-binding-like protein 12 - Oryza sativa subsp. indica (Rice), partial (13%)
	bpe-miR156a-5p.G13T	TGACAGAAGAGATTGAGCAC	TC162283	2.5	1	20	192	211	UGACAGAAGAGAUUGAGCAC	:::::: ::::::::::::	GUGCUCUCUCUCUUCUGUCA	Cleavage	similar to UniRef100_A7PFE5 Cluster: Chromosome chr11 scaffold_14, whole genome shotgun sequence; n=1; Vitis vinifera|Rep: Chromosome chr11 scaffold_14, whole genome shotgun sequence - Vitis vinifera (Grape), partial (6%)
	bpe-miR156a-5p.G13T	TGACAGAAGAGATTGAGCAC	TC139619	2.5	1	20	121	140	UGACAGAAGAGAUUGAGCAC	:::::: ::::::::::::	GUGCUCUCUCUCUUCUGUCA	Cleavage	similar to UniRef100_Q94JW8 Cluster: Squamosa promoter-binding-like protein 6; n=1; Arabidopsis thaliana|Rep: Squamosa promoter-binding-like protein 6 - Arabidopsis thaliana (Mouse-ear cress), partial (9%)
	bpe-miR156a-5p.G13T	TGACAGAAGAGATTGAGCAC	TC140194	2.5	1	20	391	410	UGACAGAAGAGAUUGAGCAC	:::::: ::::::::::::	GUGCUCUCUCUCUUCUGUCA	Cleavage	similar to UniRef100_A7PKG5 Cluster: Chromosome chr15 scaffold_19, whole genome shotgun sequence; n=1; Vitis vinifera|Rep: Chromosome chr15 scaffold_19, whole genome shotgun sequence - Vitis vinifera (Grape), partial (67%)
	bpe-miR156a-5p.G13T	TGACAGAAGAGATTGAGCAC	TC161130	2.5	1	20	423	442	UGACAGAAGAGAUUGAGCAC	:::::: ::::::::::::	GUGCUCUCUCUCUUCUGUCA	Cleavage	similar to UniRef100_Q94JW8 Cluster: Squamosa promoter-binding-like protein 6; n=1; Arabidopsis thaliana|Rep: Squamosa promoter-binding-like protein 6 - Arabidopsis thaliana (Mouse-ear cress), partial (12%)
	bpe-miR156a-5p.G13T	TGACAGAAGAGATTGAGCAC	TC188289	2.5	1	20	481	500	UGACAGAAGAGAUUGAGCAC	:::::: ::::::::::::	GUGCUCUCUCUCUUCUGUCA	Cleavage	similar to UniRef100_A7PFE5 Cluster: Chromosome chr11 scaffold_14, whole genome shotgun sequence; n=1; Vitis vinifera|Rep: Chromosome chr11 scaffold_14, whole genome shotgun sequence - Vitis vinifera (Grape), partial (13%)
	bpe-miR156a-5p.G13T	TGACAGAAGAGATTGAGCAC	TC179932	2.5	1	20	832	851	UGACAGAAGAGAUUGAGCAC	:::::: ::::::::::::	GUGCUCUCUCUCUUCUGUCA	Cleavage	similar to UniRef100_A7QP31 Cluster: Chromosome chr1 scaffold_136, whole genome shotgun sequence; n=1; Vitis vinifera|Rep: Chromosome chr1 scaffold_136, whole genome shotgun sequence - Vitis vinifera (Grape), partial (53%)
	bpe-miR156a-5p.G13T	TGACAGAAGAGATTGAGCAC	TC155685	2.5	1	20	1162	1181	UGACAGAAGAGAUUGAGCAC	:::::: ::::::::::::	GUGCUCUCUCUCUUCUGUCA	Cleavage	similar to UniRef100_Q6YZE8 Cluster: Squamosa promoter-binding-like protein 16; n=1; Oryza sativa Japonica Group|Rep: Squamosa promoter-binding-like protein 16 - Oryza sativa subsp. japonica (Rice), partial (24%)
	bpe-miR156a-5p.G13T	TGACAGAAGAGATTGAGCAC	TC150948	2.5	1	20	342	361	UGACAGAAGAGAUUGAGCAC	:::::: ::::::::::::	GUGCUCUCUCUCUUCUGUCA	Cleavage	similar to UniRef100_A7PFE5 Cluster: Chromosome chr11 scaffold_14, whole genome shotgun sequence; n=1; Vitis vinifera|Rep: Chromosome chr11 scaffold_14, whole genome shotgun sequence - Vitis vinifera (Grape), partial (10%)
	bpe-miR156a-5p.G13T	TGACAGAAGAGATTGAGCAC	TC158039	2.5	1	20	696	715	UGACAGAAGAGAUUGAGCAC	:::::: ::::::::::::	GUGCUCUCUCUCUUCUGUCA	Cleavage	similar to UniRef100_A7PFE5 Cluster: Chromosome chr11 scaffold_14, whole genome shotgun sequence; n=1; Vitis vinifera|Rep: Chromosome chr11 scaffold_14, whole genome shotgun sequence - Vitis vinifera (Grape), partial (49%)
	bpe-miR156a-5p.G13T	TGACAGAAGAGATTGAGCAC	TC165869	2.5	1	20	1193	1212	UGACAGAAGAGAUUGAGCAC	:::.:. ::::.::::::::	GUGUUUUAUCUUUUCUGUCA	Cleavage	similar to UniRef100_A7NTH0 Cluster: Chromosome chr18 scaffold_1, whole genome shotgun sequence; n=1; Vitis vinifera|Rep: Chromosome chr18 scaffold_1, whole genome shotgun sequence - Vitis vinifera (Grape), partial (88%)
	bpe-miR156a-5p.G13T	TGACAGAAGAGATTGAGCAC	TC183825	2.5	1	20	401	420	UGACAGAAGAGAUUGAGCAC	:::::: ::::::::::::	GUGCUCUCUCUCUUCUGUCA	Cleavage	similar to UniRef100_A7PFE5 Cluster: Chromosome chr11 scaffold_14, whole genome shotgun sequence; n=1; Vitis vinifera|Rep: Chromosome chr11 scaffold_14, whole genome shotgun sequence - Vitis vinifera (Grape), partial (11%)
	bpe-miR156a-5p.G13T	TGACAGAAGAGATTGAGCAC	TC140316	2.5	1	20	1078	1097	UGACAGAAGAGAUUGAGCAC	:::::: ::::::::::::	GUGCUCUCUCUCUUCUGUCA	Cleavage	similar to UniRef100_A7PKG5 Cluster: Chromosome chr15 scaffold_19, whole genome shotgun sequence; n=1; Vitis vinifera|Rep: Chromosome chr15 scaffold_19, whole genome shotgun sequence - Vitis vinifera (Grape), partial (72%)
	bpe-miR156a-5p.G13T	TGACAGAAGAGATTGAGCAC	CV279413	2.5	1	20	404	423	UGACAGAAGAGAUUGAGCAC	: .:.::::::::.:::::	AUUUUUAAUCUCUUUUGUCA	Cleavage	weakly similar to UniRef100_Q2R2E6 Cluster: Expressed protein; n=2; Oryza sativa Japonica Group|Rep: Expressed protein - Oryza sativa subsp. japonica (Rice), partial (18%)
	bpe-miR156a-5p.G13T	TGACAGAAGAGATTGAGCAC	TC156238	2.5	1	20	628	647	UGACAGAAGAGAUUGAGCAC	::::: ::::::::::::	AUGCUCUCUCUCUUCUGUCA	Cleavage	similar to UniRef100_A7QPU0 Cluster: Chromosome chr10 scaffold_138, whole genome shotgun sequence; n=1; Vitis vinifera|Rep: Chromosome chr10 scaffold_138, whole genome shotgun sequence - Vitis vinifera (Grape), partial (69%)
	bpe-miR156a-5p.G13T	TGACAGAAGAGATTGAGCAC	TC143610	2.5	1	20	619	638	UGACAGAAGAGAUUGAGCAC	::::: ::::::::::::	AUGCUCUCUCUCUUCUGUCA	Cleavage	similar to UniRef100_P93015 Cluster: Squamosa promoter-binding-like protein 3; n=1; Arabidopsis thaliana|Rep: Squamosa promoter-binding-like protein 3 - Arabidopsis thaliana (Mouse-ear cress), partial (70%)
	bpe-miR156a-5p.G13T	TGACAGAAGAGATTGAGCAC	TC140187	2.5	1	20	727	746	UGACAGAAGAGAUUGAGCAC	::::: ::::::::::::	AUGCUCUCUCUCUUCUGUCA	Cleavage	similar to UniRef100_Q84JE4 Cluster: Squamosa promoter binding like-protein; n=1; Betula pendula|Rep: Squamosa promoter binding like-protein - Betula verrucosa (White birch) (Betula pendula), partial (80%)
	bpe-miR156a-5p.G13T	TGACAGAAGAGATTGAGCAC	TC156260	2.5	1	20	646	665	UGACAGAAGAGAUUGAGCAC	::::: ::::::::::::	AUGCUCCCUCUCUUCUGUCA	Cleavage	weakly similar to UniRef100_A7QPU0 Cluster: Chromosome chr10 scaffold_138, whole genome shotgun sequence; n=1; Vitis vinifera|Rep: Chromosome chr10 scaffold_138, whole genome shotgun sequence - Vitis vinifera (Grape), partial (78%)
	bpe-miR156a-5p.G13T	TGACAGAAGAGATTGAGCAC	TC167753	2.5	1	20	638	657	UGACAGAAGAGAUUGAGCAC	::::: ::::::::::::	AUGCUCCCUCUCUUCUGUCA	Cleavage	similar to UniRef100_Q5U8L4 Cluster: SBP transcription factor; n=1; Gossypium hirsutum|Rep: SBP transcription factor - Gossypium hirsutum (Upland cotton) (Gossypium mexicanum), partial (70%)
	bpe-miR156a-5p.G13T	TGACAGAAGAGATTGAGCAC	TC138639	2.5	1	20	681	700	UGACAGAAGAGAUUGAGCAC	::::: ::::::::::::	UUGCUCUCUCUCUUCUGUCA	Cleavage	similar to UniRef100_A7PJ70 Cluster: Chromosome chr12 scaffold_18, whole genome shotgun sequence; n=1; Vitis vinifera|Rep: Chromosome chr12 scaffold_18, whole genome shotgun sequence - Vitis vinifera (Grape), partial (70%)
	bpe-miR156a-5p.G13T	TGACAGAAGAGATTGAGCAC	TC183201	2.5	1	20	905	924	UGACAGAAGAGAUUGAGCAC	::::: ::::::::::::	UUGCUCUCUCUCUUCUGUCA	Cleavage	similar to UniRef100_Q52UU1 Cluster: Squamosa promoter binding-like protein; n=1; Betula platyphylla|Rep: Squamosa promoter binding-like protein - Betula platyphylla, partial (74%)
	bpe-miR156a-5p.G13T	TGACAGAAGAGATTGAGCAC	TC181875	2.5	1	20	980	999	UGACAGAAGAGAUUGAGCAC	::::: ::::::::::::	UUGCUCUCUCUCUUCUGUCA	Cleavage	homologue to UniRef100_Q96035 Cluster: Cytochrome oxidase subunit 3; n=1; Magnolia grandiflora|Rep: Cytochrome oxidase subunit 3 - Magnolia grandiflora (Southern magnolia), partial (69%)
	bpe-miR156a-5p.G13T	TGACAGAAGAGATTGAGCAC	TC148929	3	1	20	130	149	UGACAGAAGAGAUUGAGCAC	.:::::::::::::::.	CCAUUCAAUCUCUUCUGUCG	Cleavage	similar to UniRef100_A7Q1P7 Cluster: Chromosome chr7 scaffold_44, whole genome shotgun sequence; n=1; Vitis vinifera|Rep: Chromosome chr7 scaffold_44, whole genome shotgun sequence - Vitis vinifera (Grape), partial (69%)
	bpe-miR156a-5p.G13T	TGACAGAAGAGATTGAGCAC	BU826678	3	1	20	149	168	UGACAGAAGAGAUUGAGCAC	:::::.::.::: :::::.	UUGCUCGAUUUCUACUGUCG	Cleavage	similar to UniRef100_Q4W1C6 Cluster: Kunitz trypsin inhibitor; n=1; Populus tremula|Rep: Kunitz trypsin inhibitor - Populus tremula (European aspen), partial (64%)
	bpe-miR156a-5p.G13T	TGACAGAAGAGATTGAGCAC	AJ773360	3	1	20	274	293	UGACAGAAGAGAUUGAGCAC	::::::::. :::::::..	AUGCUCAAUUGCUUCUGUUG	Translation	homologue to UniRef100_A7P105 Cluster: Chromosome chr19 scaffold_4, whole genome shotgun sequence; n=1; Vitis vinifera|Rep: Chromosome chr19 scaffold_4, whole genome shotgun sequence - Vitis vinifera (Grape), partial (10%)
	bpe-miR156a-5p.G13T	TGACAGAAGAGATTGAGCAC	CK096623	3	1	20	599	618	UGACAGAAGAGAUUGAGCAC	:::::::::: :::::::	AUGCUCAAUCUGAUCUGUCA	Cleavage	similar to UniRef100_A7QCR6 Cluster: Chromosome undetermined scaffold_79, whole genome shotgun sequence; n=1; Vitis vinifera|Rep: Chromosome undetermined scaffold_79, whole genome shotgun sequence - Vitis vinifera (Grape), partial (7%)
	bpe-miR156a-5p.G13T	TGACAGAAGAGATTGAGCAC	TC160693	3	1	20	397	416	UGACAGAAGAGAUUGAGCAC	::::::::. :::::::..	AUGCUCAAUUGCUUCUGUUG	Translation	homologue to UniRef100_Q9M0X6 Cluster: Kinesin-like protein; n=1; Arabidopsis thaliana|Rep: Kinesin-like protein - Arabidopsis thaliana (Mouse-ear cress), partial (15%)
	bpe-miR156a-5p.G13T	TGACAGAAGAGATTGAGCAC	TC141292	3	1	20	1084	1103	UGACAGAAGAGAUUGAGCAC	::.::::::::::. ::.:	CUGUUCAAUCUCUUUAGUUA	Cleavage	similar to UniRef100_A7P8C0 Cluster: Chromosome chr3 scaffold_8, whole genome shotgun sequence; n=1; Vitis vinifera|Rep: Chromosome chr3 scaffold_8, whole genome shotgun sequence - Vitis vinifera (Grape), partial (54%)
	bpe-miR156a-5p.G13T	TGACAGAAGAGATTGAGCAC	CU310678	3	1	20	52	71	UGACAGAAGAGAUUGAGCAC	:::: :::.:::::: :::	AUGCUGAAUUUCUUCUUUCA	Cleavage	homologue to UniRef100_A7QYQ6 Cluster: Chromosome chr5 scaffold_253, whole genome shotgun sequence; n=1; Vitis vinifera|Rep: Chromosome chr5 scaffold_253, whole genome shotgun sequence - Vitis vinifera (Grape), partial (4%)
	bpe-miR156a-5p.G13T	TGACAGAAGAGATTGAGCAC	CV261391	3	1	20	242	261	UGACAGAAGAGAUUGAGCAC	: ::::::::.: ::::::	CUUCUCAAUCUUUCCUGUCA	Cleavage	similar to UniRef100_A7PEV0 Cluster: Chromosome chr11 scaffold_13, whole genome shotgun sequence; n=1; Vitis vinifera|Rep: Chromosome chr11 scaffold_13, whole genome shotgun sequence - Vitis vinifera (Grape), partial (8%)
	bpe-miR156a-5p.G13T	TGACAGAAGAGATTGAGCAC	TC147094	3	1	20	110	129	UGACAGAAGAGAUUGAGCAC	: .:.:::.::::::::.:	CUCUUUAAUUUCUUCUGUUA	Cleavage	homologue to UniRef100_A1US20 Cluster: Hemin ABC transporter, permease protein; n=1; Bartonella bacilliformis KC583|Rep: Hemin ABC transporter, permease protein - Bartonella bacilliformis (strain ATCC 35685 / KC583), partial (5%)
	bpe-miR156a-5p.G13T	TGACAGAAGAGATTGAGCAC	TC171416	3	1	20	640	659	UGACAGAAGAGAUUGAGCAC	: .:::::.::::::::..	UUAUUCAAUUUCUUCUGUUG	Cleavage	similar to UniRef100_A7P791 Cluster: Chromosome chr9 scaffold_7, whole genome shotgun sequence; n=1; Vitis vinifera|Rep: Chromosome chr9 scaffold_7, whole genome shotgun sequence - Vitis vinifera (Grape), partial (82%)
	bpe-miR156a-5p.G13T	TGACAGAAGAGATTGAGCAC	TC180445	3	1	20	180	199	UGACAGAAGAGAUUGAGCAC	: ::. ::.::::::::::	UUCCUUCAUUUCUUCUGUCA	Cleavage
	bpe-miR156a-5p.G13T	TGACAGAAGAGATTGAGCAC	DB886036	3	1	20	172	191	UGACAGAAGAGAUUGAGCAC	:: :: .:::.::::::::	UUGGUCUGUCUUUUCUGUCA	Cleavage	similar to UniRef100_Q9ZTM6 Cluster: PGPD14; n=1; Petunia x hybrida|Rep: PGPD14 - Petunia hybrida (Petunia), partial (33%)
	bpe-miR156a-5p.GA	TGACAGAAGAGAGTGAGCACGA	TC159682	1	1	22	40	61	UGACAGAAGAGAGUGAGCACGA	:::::::: :::::::::::::	UCGUGCUCUCUCUCUUCUGUCA	Cleavage	similar to UniRef100_A7PFE5 Cluster: Chromosome chr11 scaffold_14, whole genome shotgun sequence; n=1; Vitis vinifera|Rep: Chromosome chr11 scaffold_14, whole genome shotgun sequence - Vitis vinifera (Grape), partial (6%)
	bpe-miR156a-5p.GA	TGACAGAAGAGAGTGAGCACGA	CN523533	1	1	22	536	557	UGACAGAAGAGAGUGAGCACGA	:::::::: :::::::::::::	UCGUGCUCUCUCUCUUCUGUCA	Cleavage	homologue to UniRef100_A2YGR5 Cluster: Squamosa promoter-binding-like protein 12; n=1; Oryza sativa Indica Group|Rep: Squamosa promoter-binding-like protein 12 - Oryza sativa subsp. indica (Rice), partial (13%)
	bpe-miR156a-5p.GA	TGACAGAAGAGAGTGAGCACGA	TC162283	1	1	22	190	211	UGACAGAAGAGAGUGAGCACGA	:::::::: :::::::::::::	UCGUGCUCUCUCUCUUCUGUCA	Cleavage	similar to UniRef100_A7PFE5 Cluster: Chromosome chr11 scaffold_14, whole genome shotgun sequence; n=1; Vitis vinifera|Rep: Chromosome chr11 scaffold_14, whole genome shotgun sequence - Vitis vinifera (Grape), partial (6%)
	bpe-miR156a-5p.GA	TGACAGAAGAGAGTGAGCACGA	TC188289	1	1	22	479	500	UGACAGAAGAGAGUGAGCACGA	:::::::: :::::::::::::	UCGUGCUCUCUCUCUUCUGUCA	Cleavage	similar to UniRef100_A7PFE5 Cluster: Chromosome chr11 scaffold_14, whole genome shotgun sequence; n=1; Vitis vinifera|Rep: Chromosome chr11 scaffold_14, whole genome shotgun sequence - Vitis vinifera (Grape), partial (13%)
	bpe-miR156a-5p.GA	TGACAGAAGAGAGTGAGCACGA	TC150948	1	1	22	340	361	UGACAGAAGAGAGUGAGCACGA	:::::::: :::::::::::::	UCGUGCUCUCUCUCUUCUGUCA	Cleavage	similar to UniRef100_A7PFE5 Cluster: Chromosome chr11 scaffold_14, whole genome shotgun sequence; n=1; Vitis vinifera|Rep: Chromosome chr11 scaffold_14, whole genome shotgun sequence - Vitis vinifera (Grape), partial (10%)
	bpe-miR156a-5p.GA	TGACAGAAGAGAGTGAGCACGA	TC183825	1	1	22	399	420	UGACAGAAGAGAGUGAGCACGA	:::::::: :::::::::::::	UCGUGCUCUCUCUCUUCUGUCA	Cleavage	similar to UniRef100_A7PFE5 Cluster: Chromosome chr11 scaffold_14, whole genome shotgun sequence; n=1; Vitis vinifera|Rep: Chromosome chr11 scaffold_14, whole genome shotgun sequence - Vitis vinifera (Grape), partial (11%)
	bpe-miR156a-5p.GA	TGACAGAAGAGAGTGAGCACGA	TC170313	1	1	22	43	64	UGACAGAAGAGAGUGAGCACGA	:.:::::: :::::::::::::	UUGUGCUCUCUCUCUUCUGUCA	Cleavage
	bpe-miR156a-5p.GA	TGACAGAAGAGAGTGAGCACGA	TC155685	1	1	22	1160	1181	UGACAGAAGAGAGUGAGCACGA	:.:::::: :::::::::::::	UUGUGCUCUCUCUCUUCUGUCA	Cleavage	similar to UniRef100_Q6YZE8 Cluster: Squamosa promoter-binding-like protein 16; n=1; Oryza sativa Japonica Group|Rep: Squamosa promoter-binding-like protein 16 - Oryza sativa subsp. japonica (Rice), partial (24%)
	bpe-miR156a-5p.GA	TGACAGAAGAGAGTGAGCACGA	TC179932	1	1	22	830	851	UGACAGAAGAGAGUGAGCACGA	::::::: :::::::::::::	CCGUGCUCUCUCUCUUCUGUCA	Cleavage	similar to UniRef100_A7QP31 Cluster: Chromosome chr1 scaffold_136, whole genome shotgun sequence; n=1; Vitis vinifera|Rep: Chromosome chr1 scaffold_136, whole genome shotgun sequence - Vitis vinifera (Grape), partial (53%)
	bpe-miR156a-5p.GA	TGACAGAAGAGAGTGAGCACGA	TC158039	1	1	22	694	715	UGACAGAAGAGAGUGAGCACGA	::::::: :::::::::::::	GCGUGCUCUCUCUCUUCUGUCA	Cleavage	similar to UniRef100_A7PFE5 Cluster: Chromosome chr11 scaffold_14, whole genome shotgun sequence; n=1; Vitis vinifera|Rep: Chromosome chr11 scaffold_14, whole genome shotgun sequence - Vitis vinifera (Grape), partial (49%)
	bpe-miR156a-5p.GA	TGACAGAAGAGAGTGAGCACGA	TC139619	1	1	22	119	140	UGACAGAAGAGAGUGAGCACGA	.:::::: :::::::::::::	CUGUGCUCUCUCUCUUCUGUCA	Cleavage	similar to UniRef100_Q94JW8 Cluster: Squamosa promoter-binding-like protein 6; n=1; Arabidopsis thaliana|Rep: Squamosa promoter-binding-like protein 6 - Arabidopsis thaliana (Mouse-ear cress), partial (9%)
	bpe-miR156a-5p.GA	TGACAGAAGAGAGTGAGCACGA	TC140194	1	1	22	389	410	UGACAGAAGAGAGUGAGCACGA	.:::::: :::::::::::::	AUGUGCUCUCUCUCUUCUGUCA	Cleavage	similar to UniRef100_A7PKG5 Cluster: Chromosome chr15 scaffold_19, whole genome shotgun sequence; n=1; Vitis vinifera|Rep: Chromosome chr15 scaffold_19, whole genome shotgun sequence - Vitis vinifera (Grape), partial (67%)
	bpe-miR156a-5p.GA	TGACAGAAGAGAGTGAGCACGA	TC161130	1	1	22	421	442	UGACAGAAGAGAGUGAGCACGA	.:::::: :::::::::::::	CUGUGCUCUCUCUCUUCUGUCA	Cleavage	similar to UniRef100_Q94JW8 Cluster: Squamosa promoter-binding-like protein 6; n=1; Arabidopsis thaliana|Rep: Squamosa promoter-binding-like protein 6 - Arabidopsis thaliana (Mouse-ear cress), partial (12%)
	bpe-miR156a-5p.GA	TGACAGAAGAGAGTGAGCACGA	TC140316	1	1	22	1076	1097	UGACAGAAGAGAGUGAGCACGA	.:::::: :::::::::::::	AUGUGCUCUCUCUCUUCUGUCA	Cleavage	similar to UniRef100_A7PKG5 Cluster: Chromosome chr15 scaffold_19, whole genome shotgun sequence; n=1; Vitis vinifera|Rep: Chromosome chr15 scaffold_19, whole genome shotgun sequence - Vitis vinifera (Grape), partial (72%)
	bpe-miR156a-5p.GA	TGACAGAAGAGAGTGAGCACGA	TC156238	1	1	22	626	647	UGACAGAAGAGAGUGAGCACGA	: ::::: :::::::::::::	GCAUGCUCUCUCUCUUCUGUCA	Cleavage	similar to UniRef100_A7QPU0 Cluster: Chromosome chr10 scaffold_138, whole genome shotgun sequence; n=1; Vitis vinifera|Rep: Chromosome chr10 scaffold_138, whole genome shotgun sequence - Vitis vinifera (Grape), partial (69%)
	bpe-miR156a-5p.GA	TGACAGAAGAGAGTGAGCACGA	TC143610	1	1	22	617	638	UGACAGAAGAGAGUGAGCACGA	: ::::: :::::::::::::	GCAUGCUCUCUCUCUUCUGUCA	Cleavage	similar to UniRef100_P93015 Cluster: Squamosa promoter-binding-like protein 3; n=1; Arabidopsis thaliana|Rep: Squamosa promoter-binding-like protein 3 - Arabidopsis thaliana (Mouse-ear cress), partial (70%)
	bpe-miR156a-5p.GA	TGACAGAAGAGAGTGAGCACGA	TC140187	1	1	22	725	746	UGACAGAAGAGAGUGAGCACGA	: ::::: :::::::::::::	CCAUGCUCUCUCUCUUCUGUCA	Cleavage	similar to UniRef100_Q84JE4 Cluster: Squamosa promoter binding like-protein; n=1; Betula pendula|Rep: Squamosa promoter binding like-protein - Betula verrucosa (White birch) (Betula pendula), partial (80%)
	bpe-miR156a-5p.GA	TGACAGAAGAGAGTGAGCACGA	TC156260	1	1	22	644	665	UGACAGAAGAGAGUGAGCACGA	: ::::: :::::::::::::	GCAUGCUCCCUCUCUUCUGUCA	Cleavage	weakly similar to UniRef100_A7QPU0 Cluster: Chromosome chr10 scaffold_138, whole genome shotgun sequence; n=1; Vitis vinifera|Rep: Chromosome chr10 scaffold_138, whole genome shotgun sequence - Vitis vinifera (Grape), partial (78%)
	bpe-miR156a-5p.GA	TGACAGAAGAGAGTGAGCACGA	TC167753	1	1	22	636	657	UGACAGAAGAGAGUGAGCACGA	: ::::: :::::::::::::	GCAUGCUCCCUCUCUUCUGUCA	Cleavage	similar to UniRef100_Q5U8L4 Cluster: SBP transcription factor; n=1; Gossypium hirsutum|Rep: SBP transcription factor - Gossypium hirsutum (Upland cotton) (Gossypium mexicanum), partial (70%)
	bpe-miR156a-5p.GA	TGACAGAAGAGAGTGAGCACGA	TC138639	1	1	22	679	700	UGACAGAAGAGAGUGAGCACGA	::::: :::::::::::::	GAUUGCUCUCUCUCUUCUGUCA	Cleavage	similar to UniRef100_A7PJ70 Cluster: Chromosome chr12 scaffold_18, whole genome shotgun sequence; n=1; Vitis vinifera|Rep: Chromosome chr12 scaffold_18, whole genome shotgun sequence - Vitis vinifera (Grape), partial (70%)
	bpe-miR156a-5p.GA	TGACAGAAGAGAGTGAGCACGA	TC183201	1	1	22	903	924	UGACAGAAGAGAGUGAGCACGA	::::: :::::::::::::	GAUUGCUCUCUCUCUUCUGUCA	Cleavage	similar to UniRef100_Q52UU1 Cluster: Squamosa promoter binding-like protein; n=1; Betula platyphylla|Rep: Squamosa promoter binding-like protein - Betula platyphylla, partial (74%)
	bpe-miR156a-5p.GA	TGACAGAAGAGAGTGAGCACGA	TC181875	1	1	22	978	999	UGACAGAAGAGAGUGAGCACGA	::::: :::::::::::::	GAUUGCUCUCUCUCUUCUGUCA	Cleavage	homologue to UniRef100_Q96035 Cluster: Cytochrome oxidase subunit 3; n=1; Magnolia grandiflora|Rep: Cytochrome oxidase subunit 3 - Magnolia grandiflora (Southern magnolia), partial (69%)
	bpe-miR156a-5p.GA	TGACAGAAGAGAGTGAGCACGA	TC159843	2	1	22	30	51	UGACAGAAGAGAGUGAGCACGA	::::. :::::::.:::::	UGAUGCUUCCUCUCUUUUGUCA	Cleavage	similar to UniRef100_P93484 Cluster: Vacuolar-sorting receptor 1 precursor; n=1; Pisum sativum|Rep: Vacuolar-sorting receptor 1 precursor - Pisum sativum (Garden pea), partial (31%)
	bpe-miR156a-5p.GA	TGACAGAAGAGAGTGAGCACGA	TC167513	2.5	1	22	257	278	UGACAGAAGAGAGUGAGCACGA	:. :::::::::::::.: :.:	UUCUGCUCACUCUCUUUUUUUA	Cleavage	similar to UniRef100_Q9XGI4 Cluster: Cyclin A2; n=1; Solanum lycopersicum|Rep: Cyclin A2 - Solanum lycopersicum (Tomato) (Lycopersicon esculentum), partial (20%)
	bpe-miR156a-5p.GA	TGACAGAAGAGAGTGAGCACGA	TC138813	2.5	1	22	38	59	UGACAGAAGAGAGUGAGCACGA	:::::::::.:::::::	UAAAGCUCACUCUUUUCUGUCC	Cleavage	UniRef100_Q7EUR6 Cluster: AT4g05320/C17L7_240; n=8; core eudicotyledons|Rep: AT4g05320/C17L7_240 - Arabidopsis thaliana (Mouse-ear cress), partial (80%)
	bpe-miR156a-5p.GA	TGACAGAAGAGAGTGAGCACGA	TC146251	2.5	1	22	792	813	UGACAGAAGAGAGUGAGCACGA	:::..::.::::::::::	AUUAGCUUGCUUUCUUCUGUCA	Cleavage	similar to UniRef100_A7QQJ3 Cluster: Chromosome undetermined scaffold_143, whole genome shotgun sequence; n=1; Vitis vinifera|Rep: Chromosome undetermined scaffold_143, whole genome shotgun sequence - Vitis vinifera (Grape), partial (51%)
	bpe-miR156a-5p.GA	TGACAGAAGAGAGTGAGCACGA	TC162499	2.5	1	22	9	30	UGACAGAAGAGAGUGAGCACGA	:: : ::: :::::::.:::::	UCUUCCUCUCUCUCUUUUGUCA	Cleavage	similar to UniRef100_Q3E7D0 Cluster: Nucleobase-ascorbate transporter 12; n=3; Arabidopsis thaliana|Rep: Nucleobase-ascorbate transporter 12 - Arabidopsis thaliana (Mouse-ear cress), partial (8%)
	bpe-miR156a-5p.GA	TGACAGAAGAGAGTGAGCACGA	TC154785	2.5	1	22	63	84	UGACAGAAGAGAGUGAGCACGA	:::::.::::::::: :.:	CACUGCUCGCUCUCUUCUCUUA	Cleavage	similar to UniRef100_Q2HRW5 Cluster: Syntaxin, N-terminal; n=1; Medicago truncatula|Rep: Syntaxin, N-terminal - Medicago truncatula (Barrel medic), partial (77%)
	bpe-miR156a-5p.GA	TGACAGAAGAGAGTGAGCACGA	TC180503	3	1	22	246	267	UGACAGAAGAGAGUGAGCACGA	:: ::.::..:.:::::::::	UCCUGUUCGUUUUCUUCUGUCC	Cleavage	weakly similar to UniRef100_A4BRK1 Cluster: Probable transporter; n=1; Nitrococcus mobilis Nb-231|Rep: Probable transporter - Nitrococcus mobilis Nb-231, partial (5%)
	bpe-miR156a-5p.GA	TGACAGAAGAGAGTGAGCACGA	AJ407505	3	1	22	247	267	UGACAGAAGAGAGUGAGCACGA	.::::::::::::::: ::::	CUGUGCUCACUCUCUUC-GUCA	Cleavage	UniRef100_A7PEL7 Cluster: Chromosome chr11 scaffold_13 whole genome shotgun sequence; n=1; Vitis vinifera|Rep:, partial (1%)
	bpe-miR156a-5p.GA	TGACAGAAGAGAGTGAGCACGA	TC170385	3	1	22	144	165	UGACAGAAGAGAGUGAGCACGA	:: ::::..::::::::: :.:	UCCUGCUUGCUCUCUUCUCUUA	Cleavage	homologue to UniRef100_A9V995 Cluster: Predicted protein; n=1; Monosiga brevicollis MX1|Rep: Predicted protein - Monosiga brevicollis MX1, partial (15%)
	bpe-miR156a-5p.GA	TGACAGAAGAGAGTGAGCACGA	TC147463	3	1	22	152	173	UGACAGAAGAGAGUGAGCACGA	:. ::::..::::::::: :.:	UUCUGCUUGCUCUCUUCUAUUA	Cleavage	similar to UniRef100_A3IAY7 Cluster: Nitrogen fixation protein; n=1; Bacillus sp. B14905|Rep: Nitrogen fixation protein - Bacillus sp. B14905, partial (19%)
	bpe-miR156a-5p.GA	TGACAGAAGAGAGTGAGCACGA	TC179956	3	1	22	1291	1312	UGACAGAAGAGAGUGAGCACGA	:. ::::::::. :::.:::.:	UUCUGCUCACUUGCUUUUGUUA	Translation	similar to UniRef100_A7NUJ3 Cluster: Chromosome chr18 scaffold_1, whole genome shotgun sequence; n=1; Vitis vinifera|Rep: Chromosome chr18 scaffold_1, whole genome shotgun sequence - Vitis vinifera (Grape), partial (49%)
	bpe-miR156a-5p.GA	TGACAGAAGAGAGTGAGCACGA	TC179911	3	1	22	450	471	UGACAGAAGAGAGUGAGCACGA	::::::.::::::::.:	CUAGACUCACUUUCUUCUGUUA	Cleavage	similar to UniRef100_Q6W2J5 Cluster: VDAC1.1; n=1; Lotus japonicus|Rep: VDAC1.1 - Lotus japonicus, partial (37%)
	bpe-miR156a-5p.GA	TGACAGAAGAGAGTGAGCACGA	TC145461	3	1	22	1020	1041	UGACAGAAGAGAGUGAGCACGA	::::::.::::::::.:	CUNNNCUCACUUUCUUCUGUUA	Cleavage	similar to UniRef100_Q6W2J5 Cluster: VDAC1.1; n=1; Lotus japonicus|Rep: VDAC1.1 - Lotus japonicus, complete
	bpe-miR156a-5p.GA	TGACAGAAGAGAGTGAGCACGA	TC140389	3	1	22	1023	1044	UGACAGAAGAGAGUGAGCACGA	::::::.::::::::.:	CUAGACUCACUUUCUUCUGUUA	Cleavage	similar to UniRef100_Q6W2J5 Cluster: VDAC1.1; n=1; Lotus japonicus|Rep: VDAC1.1 - Lotus japonicus, partial (98%)
	bpe-miR156a-5p.GA	TGACAGAAGAGAGTGAGCACGA	TC156083	3	1	22	17	38	UGACAGAAGAGAGUGAGCACGA	:::::::.:::::: :::	CAAAGCUCACUUUCUUCUUUCA	Cleavage	weakly similar to UniRef100_Q84Q77 Cluster: 17.4 kDa class I heat shock protein 3; n=3; Oryza sativa|Rep: 17.4 kDa class I heat shock protein 3 - Oryza sativa subsp. japonica (Rice), partial (42%)
	bpe-miR156a-5p.GA	TGACAGAAGAGAGTGAGCACGA	TC157471	3	1	22	140	161	UGACAGAAGAGAGUGAGCACGA	:::::::.:::::: :::	CAAAGCUCACUUUCUUCUUUCA	Cleavage
	bpe-miR156a-5p.GA	TGACAGAAGAGAGTGAGCACGA	DT469891	3	1	22	663	684	UGACAGAAGAGAGUGAGCACGA	: ::.:.:.:.:.::::::.:	GCAUGUUUAUUUUUUUCUGUUA	Cleavage	UniRef100_A7RQ83 Cluster: Predicted protein; n=1; Nematostella vectensis|Rep: Predicted protein - Nematostella vectensis (Starlet sea anemone), partial (12%)
	bpe-miR156a-5p.GA	TGACAGAAGAGAGTGAGCACGA	TC181170	3	1	22	1437	1458	UGACAGAAGAGAGUGAGCACGA	::::..::::.:::::: :	GAUUGCUUGCUCUUUUCUGUAA	Cleavage	similar to UniRef100_A7NUV0 Cluster: Chromosome chr18 scaffold_1, whole genome shotgun sequence; n=1; Vitis vinifera|Rep: Chromosome chr18 scaffold_1, whole genome shotgun sequence - Vitis vinifera (Grape), partial (90%)
	bpe-miR156a-5p.GA	TGACAGAAGAGAGTGAGCACGA	DB876395	3	1	22	30	51	UGACAGAAGAGAGUGAGCACGA	::.:: ::::::::: :::	GUCUGUUCUCUCUCUUCUCUCA	Cleavage	similar to UniRef100_Q5BJ88 Cluster: Wasf1 protein; n=1; Xenopus tropicalis|Rep: Wasf1 protein - Xenopus tropicalis (Western clawed frog) (Silurana tropicalis), partial (5%)
	bpe-miR156a-5p.GA	TGACAGAAGAGAGTGAGCACGA	DB880423	3	1	22	83	104	UGACAGAAGAGAGUGAGCACGA	:. : ::. .::::::::::::	UUUUUCUUUUUCUCUUCUGUCA	Cleavage	similar to UniRef100_A7PEZ5 Cluster: Chromosome chr11 scaffold_13, whole genome shotgun sequence; n=1; Vitis vinifera|Rep: Chromosome chr11 scaffold_13, whole genome shotgun sequence - Vitis vinifera (Grape), partial (51%)
	bpe-miR156a-5p.GA	TGACAGAAGAGAGTGAGCACGA	TC171875	3	1	19	1	19	UGACAGAAGAGAGUGAGCA	: ::.:: :::::::::::	UACUUACACUCUUCUGUCA	Cleavage	homologue to UniRef100_A7QDX2 Cluster: Chromosome chr4 scaffold_83, whole genome shotgun sequence; n=1; Vitis vinifera|Rep: Chromosome chr4 scaffold_83, whole genome shotgun sequence - Vitis vinifera (Grape), partial (23%)
	bpe-miR156a-5p.Gs	GTGACAGAAGAGAGTGAGCAC	TC170313	1.5	1	21	45	65	GUGACAGAAGAGAGUGAGCAC	:::::: :::::::::::::.	GUGCUCUCUCUCUUCUGUCAU	Cleavage
	bpe-miR156a-5p.Gs	GTGACAGAAGAGAGTGAGCAC	TC140194	1.5	1	21	391	411	GUGACAGAAGAGAGUGAGCAC	:::::: :::::::::::::.	GUGCUCUCUCUCUUCUGUCAU	Cleavage	similar to UniRef100_A7PKG5 Cluster: Chromosome chr15 scaffold_19, whole genome shotgun sequence; n=1; Vitis vinifera|Rep: Chromosome chr15 scaffold_19, whole genome shotgun sequence - Vitis vinifera (Grape), partial (67%)
	bpe-miR156a-5p.Gs	GTGACAGAAGAGAGTGAGCAC	TC179932	1.5	1	21	832	852	GUGACAGAAGAGAGUGAGCAC	:::::: :::::::::::::.	GUGCUCUCUCUCUUCUGUCAU	Cleavage	similar to UniRef100_A7QP31 Cluster: Chromosome chr1 scaffold_136, whole genome shotgun sequence; n=1; Vitis vinifera|Rep: Chromosome chr1 scaffold_136, whole genome shotgun sequence - Vitis vinifera (Grape), partial (53%)
	bpe-miR156a-5p.Gs	GTGACAGAAGAGAGTGAGCAC	TC155685	1.5	1	21	1162	1182	GUGACAGAAGAGAGUGAGCAC	:::::: :::::::::::::.	GUGCUCUCUCUCUUCUGUCAU	Cleavage	similar to UniRef100_Q6YZE8 Cluster: Squamosa promoter-binding-like protein 16; n=1; Oryza sativa Japonica Group|Rep: Squamosa promoter-binding-like protein 16 - Oryza sativa subsp. japonica (Rice), partial (24%)
	bpe-miR156a-5p.Gs	GTGACAGAAGAGAGTGAGCAC	TC140316	1.5	1	21	1078	1098	GUGACAGAAGAGAGUGAGCAC	:::::: :::::::::::::.	GUGCUCUCUCUCUUCUGUCAU	Cleavage	similar to UniRef100_A7PKG5 Cluster: Chromosome chr15 scaffold_19, whole genome shotgun sequence; n=1; Vitis vinifera|Rep: Chromosome chr15 scaffold_19, whole genome shotgun sequence - Vitis vinifera (Grape), partial (72%)
	bpe-miR156a-5p.Gs	GTGACAGAAGAGAGTGAGCAC	TC138639	1.5	1	21	681	701	GUGACAGAAGAGAGUGAGCAC	::::: :::::::::::::.	UUGCUCUCUCUCUUCUGUCAU	Cleavage	similar to UniRef100_A7PJ70 Cluster: Chromosome chr12 scaffold_18, whole genome shotgun sequence; n=1; Vitis vinifera|Rep: Chromosome chr12 scaffold_18, whole genome shotgun sequence - Vitis vinifera (Grape), partial (70%)
	bpe-miR156a-5p.Gs	GTGACAGAAGAGAGTGAGCAC	TC183201	1.5	1	21	905	925	GUGACAGAAGAGAGUGAGCAC	::::: :::::::::::::.	UUGCUCUCUCUCUUCUGUCAU	Cleavage	similar to UniRef100_Q52UU1 Cluster: Squamosa promoter binding-like protein; n=1; Betula platyphylla|Rep: Squamosa promoter binding-like protein - Betula platyphylla, partial (74%)
	bpe-miR156a-5p.Gs	GTGACAGAAGAGAGTGAGCAC	TC181875	1.5	1	21	980	1000	GUGACAGAAGAGAGUGAGCAC	::::: :::::::::::::.	UUGCUCUCUCUCUUCUGUCAU	Cleavage	homologue to UniRef100_Q96035 Cluster: Cytochrome oxidase subunit 3; n=1; Magnolia grandiflora|Rep: Cytochrome oxidase subunit 3 - Magnolia grandiflora (Southern magnolia), partial (69%)
	bpe-miR156a-5p.Gs	GTGACAGAAGAGAGTGAGCAC	TC159682	2	1	21	42	62	GUGACAGAAGAGAGUGAGCAC	:::::: :::::::::::::	GUGCUCUCUCUCUUCUGUCAA	Cleavage	similar to UniRef100_A7PFE5 Cluster: Chromosome chr11 scaffold_14, whole genome shotgun sequence; n=1; Vitis vinifera|Rep: Chromosome chr11 scaffold_14, whole genome shotgun sequence - Vitis vinifera (Grape), partial (6%)
	bpe-miR156a-5p.Gs	GTGACAGAAGAGAGTGAGCAC	CN523533	2	1	21	538	558	GUGACAGAAGAGAGUGAGCAC	:::::: :::::::::::::	GUGCUCUCUCUCUUCUGUCAA	Cleavage	homologue to UniRef100_A2YGR5 Cluster: Squamosa promoter-binding-like protein 12; n=1; Oryza sativa Indica Group|Rep: Squamosa promoter-binding-like protein 12 - Oryza sativa subsp. indica (Rice), partial (13%)
	bpe-miR156a-5p.Gs	GTGACAGAAGAGAGTGAGCAC	TC162283	2	1	21	192	212	GUGACAGAAGAGAGUGAGCAC	:::::: :::::::::::::	GUGCUCUCUCUCUUCUGUCAA	Cleavage	similar to UniRef100_A7PFE5 Cluster: Chromosome chr11 scaffold_14, whole genome shotgun sequence; n=1; Vitis vinifera|Rep: Chromosome chr11 scaffold_14, whole genome shotgun sequence - Vitis vinifera (Grape), partial (6%)
	bpe-miR156a-5p.Gs	GTGACAGAAGAGAGTGAGCAC	TC139619	2	1	21	121	141	GUGACAGAAGAGAGUGAGCAC	:::::: :::::::::::::	GUGCUCUCUCUCUUCUGUCAG	Cleavage	similar to UniRef100_Q94JW8 Cluster: Squamosa promoter-binding-like protein 6; n=1; Arabidopsis thaliana|Rep: Squamosa promoter-binding-like protein 6 - Arabidopsis thaliana (Mouse-ear cress), partial (9%)
	bpe-miR156a-5p.Gs	GTGACAGAAGAGAGTGAGCAC	TC161130	2	1	21	423	443	GUGACAGAAGAGAGUGAGCAC	:::::: :::::::::::::	GUGCUCUCUCUCUUCUGUCAG	Cleavage	similar to UniRef100_Q94JW8 Cluster: Squamosa promoter-binding-like protein 6; n=1; Arabidopsis thaliana|Rep: Squamosa promoter-binding-like protein 6 - Arabidopsis thaliana (Mouse-ear cress), partial (12%)
	bpe-miR156a-5p.Gs	GTGACAGAAGAGAGTGAGCAC	TC188289	2	1	21	481	501	GUGACAGAAGAGAGUGAGCAC	:::::: :::::::::::::	GUGCUCUCUCUCUUCUGUCAA	Cleavage	similar to UniRef100_A7PFE5 Cluster: Chromosome chr11 scaffold_14, whole genome shotgun sequence; n=1; Vitis vinifera|Rep: Chromosome chr11 scaffold_14, whole genome shotgun sequence - Vitis vinifera (Grape), partial (13%)
	bpe-miR156a-5p.Gs	GTGACAGAAGAGAGTGAGCAC	TC150948	2	1	21	342	362	GUGACAGAAGAGAGUGAGCAC	:::::: :::::::::::::	GUGCUCUCUCUCUUCUGUCAA	Cleavage	similar to UniRef100_A7PFE5 Cluster: Chromosome chr11 scaffold_14, whole genome shotgun sequence; n=1; Vitis vinifera|Rep: Chromosome chr11 scaffold_14, whole genome shotgun sequence - Vitis vinifera (Grape), partial (10%)
	bpe-miR156a-5p.Gs	GTGACAGAAGAGAGTGAGCAC	TC158039	2	1	21	696	716	GUGACAGAAGAGAGUGAGCAC	:::::: :::::::::::::	GUGCUCUCUCUCUUCUGUCAA	Cleavage	similar to UniRef100_A7PFE5 Cluster: Chromosome chr11 scaffold_14, whole genome shotgun sequence; n=1; Vitis vinifera|Rep: Chromosome chr11 scaffold_14, whole genome shotgun sequence - Vitis vinifera (Grape), partial (49%)
	bpe-miR156a-5p.Gs	GTGACAGAAGAGAGTGAGCAC	TC183825	2	1	21	401	421	GUGACAGAAGAGAGUGAGCAC	:::::: :::::::::::::	GUGCUCUCUCUCUUCUGUCAA	Cleavage	similar to UniRef100_A7PFE5 Cluster: Chromosome chr11 scaffold_14, whole genome shotgun sequence; n=1; Vitis vinifera|Rep: Chromosome chr11 scaffold_14, whole genome shotgun sequence - Vitis vinifera (Grape), partial (11%)
	bpe-miR156a-5p.Gs	GTGACAGAAGAGAGTGAGCAC	TC156238	2	1	21	628	648	GUGACAGAAGAGAGUGAGCAC	::::: :::::::::::::	AUGCUCUCUCUCUUCUGUCAA	Cleavage	similar to UniRef100_A7QPU0 Cluster: Chromosome chr10 scaffold_138, whole genome shotgun sequence; n=1; Vitis vinifera|Rep: Chromosome chr10 scaffold_138, whole genome shotgun sequence - Vitis vinifera (Grape), partial (69%)
	bpe-miR156a-5p.Gs	GTGACAGAAGAGAGTGAGCAC	TC143610	2	1	21	619	639	GUGACAGAAGAGAGUGAGCAC	::::: :::::::::::::	AUGCUCUCUCUCUUCUGUCAA	Cleavage	similar to UniRef100_P93015 Cluster: Squamosa promoter-binding-like protein 3; n=1; Arabidopsis thaliana|Rep: Squamosa promoter-binding-like protein 3 - Arabidopsis thaliana (Mouse-ear cress), partial (70%)
	bpe-miR156a-5p.Gs	GTGACAGAAGAGAGTGAGCAC	TC140187	2	1	21	727	747	GUGACAGAAGAGAGUGAGCAC	::::: :::::::::::::	AUGCUCUCUCUCUUCUGUCAA	Cleavage	similar to UniRef100_Q84JE4 Cluster: Squamosa promoter binding like-protein; n=1; Betula pendula|Rep: Squamosa promoter binding like-protein - Betula verrucosa (White birch) (Betula pendula), partial (80%)
	bpe-miR156a-5p.Gs	GTGACAGAAGAGAGTGAGCAC	TC156260	2	1	21	646	666	GUGACAGAAGAGAGUGAGCAC	::::: :::::::::::::	AUGCUCCCUCUCUUCUGUCAA	Cleavage	weakly similar to UniRef100_A7QPU0 Cluster: Chromosome chr10 scaffold_138, whole genome shotgun sequence; n=1; Vitis vinifera|Rep: Chromosome chr10 scaffold_138, whole genome shotgun sequence - Vitis vinifera (Grape), partial (78%)
	bpe-miR156a-5p.Gs	GTGACAGAAGAGAGTGAGCAC	TC167753	2	1	21	638	658	GUGACAGAAGAGAGUGAGCAC	::::: :::::::::::::	AUGCUCCCUCUCUUCUGUCAA	Cleavage	similar to UniRef100_Q5U8L4 Cluster: SBP transcription factor; n=1; Gossypium hirsutum|Rep: SBP transcription factor - Gossypium hirsutum (Upland cotton) (Gossypium mexicanum), partial (70%)
	bpe-miR156a-5p.Gs	GTGACAGAAGAGAGTGAGCAC	TC179911	2.5	1	21	452	472	GUGACAGAAGAGAGUGAGCAC	::::::.::::::::.:.	AGACUCACUUUCUUCUGUUAU	Cleavage	similar to UniRef100_Q6W2J5 Cluster: VDAC1.1; n=1; Lotus japonicus|Rep: VDAC1.1 - Lotus japonicus, partial (37%)
	bpe-miR156a-5p.Gs	GTGACAGAAGAGAGTGAGCAC	TC145461	2.5	1	21	1022	1042	GUGACAGAAGAGAGUGAGCAC	::::::.::::::::.:.	NNNCUCACUUUCUUCUGUUAU	Cleavage	similar to UniRef100_Q6W2J5 Cluster: VDAC1.1; n=1; Lotus japonicus|Rep: VDAC1.1 - Lotus japonicus, complete
	bpe-miR156a-5p.Gs	GTGACAGAAGAGAGTGAGCAC	TC146251	2.5	1	21	794	814	GUGACAGAAGAGAGUGAGCAC	:::..::.::::::::::	UAGCUUGCUUUCUUCUGUCAA	Cleavage	similar to UniRef100_A7QQJ3 Cluster: Chromosome undetermined scaffold_143, whole genome shotgun sequence; n=1; Vitis vinifera|Rep: Chromosome undetermined scaffold_143, whole genome shotgun sequence - Vitis vinifera (Grape), partial (51%)
	bpe-miR156a-5p.Gs	GTGACAGAAGAGAGTGAGCAC	TC140389	2.5	1	21	1025	1045	GUGACAGAAGAGAGUGAGCAC	::::::.::::::::.:.	AGACUCACUUUCUUCUGUUAU	Cleavage	similar to UniRef100_Q6W2J5 Cluster: VDAC1.1; n=1; Lotus japonicus|Rep: VDAC1.1 - Lotus japonicus, partial (98%)
	bpe-miR156a-5p.Gs	GTGACAGAAGAGAGTGAGCAC	TC156083	2.5	1	21	19	39	GUGACAGAAGAGAGUGAGCAC	:::::::.:::::: :::.	AAGCUCACUUUCUUCUUUCAU	Cleavage	weakly similar to UniRef100_Q84Q77 Cluster: 17.4 kDa class I heat shock protein 3; n=3; Oryza sativa|Rep: 17.4 kDa class I heat shock protein 3 - Oryza sativa subsp. japonica (Rice), partial (42%)
	bpe-miR156a-5p.Gs	GTGACAGAAGAGAGTGAGCAC	TC157471	2.5	1	21	142	162	GUGACAGAAGAGAGUGAGCAC	:::::::.:::::: :::.	AAGCUCACUUUCUUCUUUCAU	Cleavage
	bpe-miR156a-5p.Gs	GTGACAGAAGAGAGTGAGCAC	TC170385	3	1	21	146	166	GUGACAGAAGAGAGUGAGCAC	::::..::::::::: :.::	CUGCUUGCUCUCUUCUCUUAC	Cleavage	homologue to UniRef100_A9V995 Cluster: Predicted protein; n=1; Monosiga brevicollis MX1|Rep: Predicted protein - Monosiga brevicollis MX1, partial (15%)
	bpe-miR156a-5p.Gs	GTGACAGAAGAGAGTGAGCAC	DT469891	3	1	21	665	685	GUGACAGAAGAGAGUGAGCAC	::.:.:.:.:.::::::.::	AUGUUUAUUUUUUUCUGUUAC	Cleavage	UniRef100_A7RQ83 Cluster: Predicted protein; n=1; Nematostella vectensis|Rep: Predicted protein - Nematostella vectensis (Starlet sea anemone), partial (12%)
	bpe-miR156a-5p.Gs	GTGACAGAAGAGAGTGAGCAC	TC138813	3	1	21	40	60	GUGACAGAAGAGAGUGAGCAC	:::::::::.:::::::	AAGCUCACUCUUUUCUGUCCG	Cleavage	UniRef100_Q7EUR6 Cluster: AT4g05320/C17L7_240; n=8; core eudicotyledons|Rep: AT4g05320/C17L7_240 - Arabidopsis thaliana (Mouse-ear cress), partial (80%)
	bpe-miR156a-5p.Gs	GTGACAGAAGAGAGTGAGCAC	TC154785	3	1	21	65	85	GUGACAGAAGAGAGUGAGCAC	:::::.::::::::: :.:.	CUGCUCGCUCUCUUCUCUUAU	Cleavage	similar to UniRef100_Q2HRW5 Cluster: Syntaxin, N-terminal; n=1; Medicago truncatula|Rep: Syntaxin, N-terminal - Medicago truncatula (Barrel medic), partial (77%)
	bpe-miR156a-5p.Gs	GTGACAGAAGAGAGTGAGCAC	TC159843	3	1	21	32	52	GUGACAGAAGAGAGUGAGCAC	::::. :::::::.:::::	AUGCUUCCUCUCUUUUGUCAA	Cleavage	similar to UniRef100_P93484 Cluster: Vacuolar-sorting receptor 1 precursor; n=1; Pisum sativum|Rep: Vacuolar-sorting receptor 1 precursor - Pisum sativum (Garden pea), partial (31%)
	bpe-miR156a-5p.Gs	GTGACAGAAGAGAGTGAGCAC	TC171875	3	1	20	1	20	GUGACAGAAGAGAGUGAGCA	: ::.:: ::::::::::::	UACUUACACUCUUCUGUCAC	Cleavage	homologue to UniRef100_A7QDX2 Cluster: Chromosome chr4 scaffold_83, whole genome shotgun sequence; n=1; Vitis vinifera|Rep: Chromosome chr4 scaffold_83, whole genome shotgun sequence - Vitis vinifera (Grape), partial (23%)
	bpe-miR156a-5p.Gs	GTGACAGAAGAGAGTGAGCAC	AJ774637	3	1	21	272	292	GUGACAGAAGAGAGUGAGCAC	::::::::.:::: ::::	UCUCUCACUCUUUUCUUUCAC	Cleavage	similar to UniRef100_A7PF64 Cluster: Chromosome chr11 scaffold_13, whole genome shotgun sequence; n=1; Vitis vinifera|Rep: Chromosome chr11 scaffold_13, whole genome shotgun sequence - Vitis vinifera (Grape), partial (17%)
	bpe-miR156a-5p.Gs	GTGACAGAAGAGAGTGAGCAC	TC138471	3	1	20	1	20	GUGACAGAAGAGAGUGAGCA	::.:: ::::::::::::	GACUUACACUCUUCUGUCAC	Cleavage	similar to UniRef100_A7QDX2 Cluster: Chromosome chr4 scaffold_83, whole genome shotgun sequence; n=1; Vitis vinifera|Rep: Chromosome chr4 scaffold_83, whole genome shotgun sequence - Vitis vinifera (Grape), complete
	bpe-miR156a-5p.Gs	GTGACAGAAGAGAGTGAGCAC	DB908627	3	1	21	195	215	GUGACAGAAGAGAGUGAGCAC	:.::.:::::::.:::: :	AAGUUCGCUCUCUUUUGUCUC	Cleavage	similar to UniRef100_A7PV45 Cluster: Chromosome chr4 scaffold_32, whole genome shotgun sequence; n=1; Vitis vinifera|Rep: Chromosome chr4 scaffold_32, whole genome shotgun sequence - Vitis vinifera (Grape), partial (29%)
	bpe-miR156a-5p.Gs	GTGACAGAAGAGAGTGAGCAC	CV257495	3	1	21	353	373	GUGACAGAAGAGAGUGAGCAC	:.:::.:::.:::: ::::	UGGUUCAUUCUUUUCUUUCAC	Cleavage
	bpe-miR156a-5p.Gs	GTGACAGAAGAGAGTGAGCAC	TC168829	3	1	21	1244	1264	GUGACAGAAGAGAGUGAGCAC	::::.::::.::.: ::::	AGGCUCGCUCUUUUUUAUCAC	Cleavage	similar to UniRef100_A7QGW9 Cluster: Chromosome chr16 scaffold_94, whole genome shotgun sequence; n=1; Vitis vinifera|Rep: Chromosome chr16 scaffold_94, whole genome shotgun sequence - Vitis vinifera (Grape), partial (49%)
	bpe-miR156a-5p.Gs	GTGACAGAAGAGAGTGAGCAC	TC162499	3	1	21	11	31	GUGACAGAAGAGAGUGAGCAC	: ::: :::::::.:::::.	UUCCUCUCUCUCUUUUGUCAU	Cleavage	similar to UniRef100_Q3E7D0 Cluster: Nucleobase-ascorbate transporter 12; n=3; Arabidopsis thaliana|Rep: Nucleobase-ascorbate transporter 12 - Arabidopsis thaliana (Mouse-ear cress), partial (8%)
	bpe-miR156a-5p.Gs	GTGACAGAAGAGAGTGAGCAC	TC157170	3	1	21	306	326	GUGACAGAAGAGAGUGAGCAC	: :: ::::::.::.:::..:	GCGCACACUCUUUUUUGUUGC	Cleavage
	bpe-miR156a-5p.Gs	GTGACAGAAGAGAGTGAGCAC	CA822666	3	1	21	228	248	GUGACAGAAGAGAGUGAGCAC	:::: :::::::::::. :	AAGCUCUCUCUCUUCUGUUCC	Cleavage	homologue to UniRef100_Q4SZ33 Cluster: Chromosome 21 SCAF11857, whole genome shotgun sequence; n=1; Tetraodon nigroviridis|Rep: Chromosome 21 SCAF11857, whole genome shotgun sequence - Tetraodon nigroviridis (Green puffer), partial (26%)
	bpe-miR156a-5p.Gs	GTGACAGAAGAGAGTGAGCAC	TC160004	3	1	21	322	342	GUGACAGAAGAGAGUGAGCAC	:::: .:.::::::::.:.	UCGCUCCUUUUCUUCUGUUAU	Cleavage	similar to UniRef100_A7PV36 Cluster: Chromosome chr4 scaffold_32, whole genome shotgun sequence; n=1; Vitis vinifera|Rep: Chromosome chr4 scaffold_32, whole genome shotgun sequence - Vitis vinifera (Grape), partial (20%)
	bpe-miR156a-5p.Gs	GTGACAGAAGAGAGTGAGCAC	TC141987	3	1	21	240	260	GUGACAGAAGAGAGUGAGCAC	:::: .:.::::::::.:.	UCGCUCCUUUUCUUCUGUUAU	Cleavage	similar to UniRef100_A7PV36 Cluster: Chromosome chr4 scaffold_32, whole genome shotgun sequence; n=1; Vitis vinifera|Rep: Chromosome chr4 scaffold_32, whole genome shotgun sequence - Vitis vinifera (Grape), partial (32%)
	bpe-miR156a-5p.Gs	GTGACAGAAGAGAGTGAGCAC	TC152593	3	1	21	240	260	GUGACAGAAGAGAGUGAGCAC	:::: .::::::.:::..:	AAGCUCCUUCUCUUUUGUUGC	Cleavage	similar to UniRef100_A7Q3D7 Cluster: Chromosome chr13 scaffold_48, whole genome shotgun sequence; n=1; Vitis vinifera|Rep: Chromosome chr13 scaffold_48, whole genome shotgun sequence - Vitis vinifera (Grape), partial (74%)
	bpe-miR156a-5p.Gs.ac	GTGACAGAAGAGAGTGAGC	TC170313	1.5	1	19	47	65	GUGACAGAAGAGAGUGAGC	:::: :::::::::::::.	GCUCUCUCUCUUCUGUCAU	Cleavage
	bpe-miR156a-5p.Gs.ac	GTGACAGAAGAGAGTGAGC	TC140194	1.5	1	19	393	411	GUGACAGAAGAGAGUGAGC	:::: :::::::::::::.	GCUCUCUCUCUUCUGUCAU	Cleavage	similar to UniRef100_A7PKG5 Cluster: Chromosome chr15 scaffold_19, whole genome shotgun sequence; n=1; Vitis vinifera|Rep: Chromosome chr15 scaffold_19, whole genome shotgun sequence - Vitis vinifera (Grape), partial (67%)
	bpe-miR156a-5p.Gs.ac	GTGACAGAAGAGAGTGAGC	TC138639	1.5	1	19	683	701	GUGACAGAAGAGAGUGAGC	:::: :::::::::::::.	GCUCUCUCUCUUCUGUCAU	Cleavage	similar to UniRef100_A7PJ70 Cluster: Chromosome chr12 scaffold_18, whole genome shotgun sequence; n=1; Vitis vinifera|Rep: Chromosome chr12 scaffold_18, whole genome shotgun sequence - Vitis vinifera (Grape), partial (70%)
	bpe-miR156a-5p.Gs.ac	GTGACAGAAGAGAGTGAGC	TC183201	1.5	1	19	907	925	GUGACAGAAGAGAGUGAGC	:::: :::::::::::::.	GCUCUCUCUCUUCUGUCAU	Cleavage	similar to UniRef100_Q52UU1 Cluster: Squamosa promoter binding-like protein; n=1; Betula platyphylla|Rep: Squamosa promoter binding-like protein - Betula platyphylla, partial (74%)
	bpe-miR156a-5p.Gs.ac	GTGACAGAAGAGAGTGAGC	TC179932	1.5	1	19	834	852	GUGACAGAAGAGAGUGAGC	:::: :::::::::::::.	GCUCUCUCUCUUCUGUCAU	Cleavage	similar to UniRef100_A7QP31 Cluster: Chromosome chr1 scaffold_136, whole genome shotgun sequence; n=1; Vitis vinifera|Rep: Chromosome chr1 scaffold_136, whole genome shotgun sequence - Vitis vinifera (Grape), partial (53%)
	bpe-miR156a-5p.Gs.ac	GTGACAGAAGAGAGTGAGC	TC181875	1.5	1	19	982	1000	GUGACAGAAGAGAGUGAGC	:::: :::::::::::::.	GCUCUCUCUCUUCUGUCAU	Cleavage	homologue to UniRef100_Q96035 Cluster: Cytochrome oxidase subunit 3; n=1; Magnolia grandiflora|Rep: Cytochrome oxidase subunit 3 - Magnolia grandiflora (Southern magnolia), partial (69%)
	bpe-miR156a-5p.Gs.ac	GTGACAGAAGAGAGTGAGC	TC155685	1.5	1	19	1164	1182	GUGACAGAAGAGAGUGAGC	:::: :::::::::::::.	GCUCUCUCUCUUCUGUCAU	Cleavage	similar to UniRef100_Q6YZE8 Cluster: Squamosa promoter-binding-like protein 16; n=1; Oryza sativa Japonica Group|Rep: Squamosa promoter-binding-like protein 16 - Oryza sativa subsp. japonica (Rice), partial (24%)
	bpe-miR156a-5p.Gs.ac	GTGACAGAAGAGAGTGAGC	TC140316	1.5	1	19	1080	1098	GUGACAGAAGAGAGUGAGC	:::: :::::::::::::.	GCUCUCUCUCUUCUGUCAU	Cleavage	similar to UniRef100_A7PKG5 Cluster: Chromosome chr15 scaffold_19, whole genome shotgun sequence; n=1; Vitis vinifera|Rep: Chromosome chr15 scaffold_19, whole genome shotgun sequence - Vitis vinifera (Grape), partial (72%)
	bpe-miR156a-5p.Gs.ac	GTGACAGAAGAGAGTGAGC	TC159682	2	1	19	44	62	GUGACAGAAGAGAGUGAGC	:::: :::::::::::::	GCUCUCUCUCUUCUGUCAA	Cleavage	similar to UniRef100_A7PFE5 Cluster: Chromosome chr11 scaffold_14, whole genome shotgun sequence; n=1; Vitis vinifera|Rep: Chromosome chr11 scaffold_14, whole genome shotgun sequence - Vitis vinifera (Grape), partial (6%)
	bpe-miR156a-5p.Gs.ac	GTGACAGAAGAGAGTGAGC	TC156238	2	1	19	630	648	GUGACAGAAGAGAGUGAGC	:::: :::::::::::::	GCUCUCUCUCUUCUGUCAA	Cleavage	similar to UniRef100_A7QPU0 Cluster: Chromosome chr10 scaffold_138, whole genome shotgun sequence; n=1; Vitis vinifera|Rep: Chromosome chr10 scaffold_138, whole genome shotgun sequence - Vitis vinifera (Grape), partial (69%)
	bpe-miR156a-5p.Gs.ac	GTGACAGAAGAGAGTGAGC	TC143610	2	1	19	621	639	GUGACAGAAGAGAGUGAGC	:::: :::::::::::::	GCUCUCUCUCUUCUGUCAA	Cleavage	similar to UniRef100_P93015 Cluster: Squamosa promoter-binding-like protein 3; n=1; Arabidopsis thaliana|Rep: Squamosa promoter-binding-like protein 3 - Arabidopsis thaliana (Mouse-ear cress), partial (70%)
	bpe-miR156a-5p.Gs.ac	GTGACAGAAGAGAGTGAGC	CN523533	2	1	19	540	558	GUGACAGAAGAGAGUGAGC	:::: :::::::::::::	GCUCUCUCUCUUCUGUCAA	Cleavage	homologue to UniRef100_A2YGR5 Cluster: Squamosa promoter-binding-like protein 12; n=1; Oryza sativa Indica Group|Rep: Squamosa promoter-binding-like protein 12 - Oryza sativa subsp. indica (Rice), partial (13%)
	bpe-miR156a-5p.Gs.ac	GTGACAGAAGAGAGTGAGC	TC162283	2	1	19	194	212	GUGACAGAAGAGAGUGAGC	:::: :::::::::::::	GCUCUCUCUCUUCUGUCAA	Cleavage	similar to UniRef100_A7PFE5 Cluster: Chromosome chr11 scaffold_14, whole genome shotgun sequence; n=1; Vitis vinifera|Rep: Chromosome chr11 scaffold_14, whole genome shotgun sequence - Vitis vinifera (Grape), partial (6%)
	bpe-miR156a-5p.Gs.ac	GTGACAGAAGAGAGTGAGC	TC140187	2	1	19	729	747	GUGACAGAAGAGAGUGAGC	:::: :::::::::::::	GCUCUCUCUCUUCUGUCAA	Cleavage	similar to UniRef100_Q84JE4 Cluster: Squamosa promoter binding like-protein; n=1; Betula pendula|Rep: Squamosa promoter binding like-protein - Betula verrucosa (White birch) (Betula pendula), partial (80%)
	bpe-miR156a-5p.Gs.ac	GTGACAGAAGAGAGTGAGC	TC139619	2	1	19	123	141	GUGACAGAAGAGAGUGAGC	:::: :::::::::::::	GCUCUCUCUCUUCUGUCAG	Cleavage	similar to UniRef100_Q94JW8 Cluster: Squamosa promoter-binding-like protein 6; n=1; Arabidopsis thaliana|Rep: Squamosa promoter-binding-like protein 6 - Arabidopsis thaliana (Mouse-ear cress), partial (9%)
	bpe-miR156a-5p.Gs.ac	GTGACAGAAGAGAGTGAGC	TC156260	2	1	19	648	666	GUGACAGAAGAGAGUGAGC	:::: :::::::::::::	GCUCCCUCUCUUCUGUCAA	Cleavage	weakly similar to UniRef100_A7QPU0 Cluster: Chromosome chr10 scaffold_138, whole genome shotgun sequence; n=1; Vitis vinifera|Rep: Chromosome chr10 scaffold_138, whole genome shotgun sequence - Vitis vinifera (Grape), partial (78%)
	bpe-miR156a-5p.Gs.ac	GTGACAGAAGAGAGTGAGC	TC167753	2	1	19	640	658	GUGACAGAAGAGAGUGAGC	:::: :::::::::::::	GCUCCCUCUCUUCUGUCAA	Cleavage	similar to UniRef100_Q5U8L4 Cluster: SBP transcription factor; n=1; Gossypium hirsutum|Rep: SBP transcription factor - Gossypium hirsutum (Upland cotton) (Gossypium mexicanum), partial (70%)
	bpe-miR156a-5p.Gs.ac	GTGACAGAAGAGAGTGAGC	TC161130	2	1	19	425	443	GUGACAGAAGAGAGUGAGC	:::: :::::::::::::	GCUCUCUCUCUUCUGUCAG	Cleavage	similar to UniRef100_Q94JW8 Cluster: Squamosa promoter-binding-like protein 6; n=1; Arabidopsis thaliana|Rep: Squamosa promoter-binding-like protein 6 - Arabidopsis thaliana (Mouse-ear cress), partial (12%)
	bpe-miR156a-5p.Gs.ac	GTGACAGAAGAGAGTGAGC	TC188289	2	1	19	483	501	GUGACAGAAGAGAGUGAGC	:::: :::::::::::::	GCUCUCUCUCUUCUGUCAA	Cleavage	similar to UniRef100_A7PFE5 Cluster: Chromosome chr11 scaffold_14, whole genome shotgun sequence; n=1; Vitis vinifera|Rep: Chromosome chr11 scaffold_14, whole genome shotgun sequence - Vitis vinifera (Grape), partial (13%)
	bpe-miR156a-5p.Gs.ac	GTGACAGAAGAGAGTGAGC	TC150948	2	1	19	344	362	GUGACAGAAGAGAGUGAGC	:::: :::::::::::::	GCUCUCUCUCUUCUGUCAA	Cleavage	similar to UniRef100_A7PFE5 Cluster: Chromosome chr11 scaffold_14, whole genome shotgun sequence; n=1; Vitis vinifera|Rep: Chromosome chr11 scaffold_14, whole genome shotgun sequence - Vitis vinifera (Grape), partial (10%)
	bpe-miR156a-5p.Gs.ac	GTGACAGAAGAGAGTGAGC	TC158039	2	1	19	698	716	GUGACAGAAGAGAGUGAGC	:::: :::::::::::::	GCUCUCUCUCUUCUGUCAA	Cleavage	similar to UniRef100_A7PFE5 Cluster: Chromosome chr11 scaffold_14, whole genome shotgun sequence; n=1; Vitis vinifera|Rep: Chromosome chr11 scaffold_14, whole genome shotgun sequence - Vitis vinifera (Grape), partial (49%)
	bpe-miR156a-5p.Gs.ac	GTGACAGAAGAGAGTGAGC	TC183825	2	1	19	403	421	GUGACAGAAGAGAGUGAGC	:::: :::::::::::::	GCUCUCUCUCUUCUGUCAA	Cleavage	similar to UniRef100_A7PFE5 Cluster: Chromosome chr11 scaffold_14, whole genome shotgun sequence; n=1; Vitis vinifera|Rep: Chromosome chr11 scaffold_14, whole genome shotgun sequence - Vitis vinifera (Grape), partial (11%)
	bpe-miR156a-5p.Gs.ac	GTGACAGAAGAGAGTGAGC	TC179911	2.5	1	19	454	472	GUGACAGAAGAGAGUGAGC	::::::.::::::::.:.	ACUCACUUUCUUCUGUUAU	Cleavage	similar to UniRef100_Q6W2J5 Cluster: VDAC1.1; n=1; Lotus japonicus|Rep: VDAC1.1 - Lotus japonicus, partial (37%)
	bpe-miR156a-5p.Gs.ac	GTGACAGAAGAGAGTGAGC	TC145461	2.5	1	19	1024	1042	GUGACAGAAGAGAGUGAGC	::::::.::::::::.:.	NCUCACUUUCUUCUGUUAU	Cleavage	similar to UniRef100_Q6W2J5 Cluster: VDAC1.1; n=1; Lotus japonicus|Rep: VDAC1.1 - Lotus japonicus, complete
	bpe-miR156a-5p.Gs.ac	GTGACAGAAGAGAGTGAGC	TC146251	2.5	1	19	796	814	GUGACAGAAGAGAGUGAGC	:::..::.::::::::::	GCUUGCUUUCUUCUGUCAA	Cleavage	similar to UniRef100_A7QQJ3 Cluster: Chromosome undetermined scaffold_143, whole genome shotgun sequence; n=1; Vitis vinifera|Rep: Chromosome undetermined scaffold_143, whole genome shotgun sequence - Vitis vinifera (Grape), partial (51%)
	bpe-miR156a-5p.Gs.ac	GTGACAGAAGAGAGTGAGC	TC140389	2.5	1	19	1027	1045	GUGACAGAAGAGAGUGAGC	::::::.::::::::.:.	ACUCACUUUCUUCUGUUAU	Cleavage	similar to UniRef100_Q6W2J5 Cluster: VDAC1.1; n=1; Lotus japonicus|Rep: VDAC1.1 - Lotus japonicus, partial (98%)
	bpe-miR156a-5p.Gs.ac	GTGACAGAAGAGAGTGAGC	TC156083	2.5	1	19	21	39	GUGACAGAAGAGAGUGAGC	:::::::.:::::: :::.	GCUCACUUUCUUCUUUCAU	Cleavage	weakly similar to UniRef100_Q84Q77 Cluster: 17.4 kDa class I heat shock protein 3; n=3; Oryza sativa|Rep: 17.4 kDa class I heat shock protein 3 - Oryza sativa subsp. japonica (Rice), partial (42%)
	bpe-miR156a-5p.Gs.ac	GTGACAGAAGAGAGTGAGC	TC157471	2.5	1	19	144	162	GUGACAGAAGAGAGUGAGC	:::::::.:::::: :::.	GCUCACUUUCUUCUUUCAU	Cleavage
	bpe-miR156a-5p.Gs.ac	GTGACAGAAGAGAGTGAGC	TC138813	3	1	19	42	60	GUGACAGAAGAGAGUGAGC	:::::::::.:::::::	GCUCACUCUUUUCUGUCCG	Cleavage	UniRef100_Q7EUR6 Cluster: AT4g05320/C17L7_240; n=8; core eudicotyledons|Rep: AT4g05320/C17L7_240 - Arabidopsis thaliana (Mouse-ear cress), partial (80%)
	bpe-miR156a-5p.Gs.ac	GTGACAGAAGAGAGTGAGC	AJ774637	3	1	19	274	292	GUGACAGAAGAGAGUGAGC	::::::::.:::: ::::	UCUCACUCUUUUCUUUCAC	Cleavage	similar to UniRef100_A7PF64 Cluster: Chromosome chr11 scaffold_13, whole genome shotgun sequence; n=1; Vitis vinifera|Rep: Chromosome chr11 scaffold_13, whole genome shotgun sequence - Vitis vinifera (Grape), partial (17%)
	bpe-miR156a-5p.Gs.ac	GTGACAGAAGAGAGTGAGC	TC171875	3	1	19	2	20	GUGACAGAAGAGAGUGAGC	::.:: ::::::::::::	ACUUACACUCUUCUGUCAC	Cleavage	homologue to UniRef100_A7QDX2 Cluster: Chromosome chr4 scaffold_83, whole genome shotgun sequence; n=1; Vitis vinifera|Rep: Chromosome chr4 scaffold_83, whole genome shotgun sequence - Vitis vinifera (Grape), partial (23%)
	bpe-miR156a-5p.Gs.ac	GTGACAGAAGAGAGTGAGC	TC138471	3	1	19	2	20	GUGACAGAAGAGAGUGAGC	::.:: ::::::::::::	ACUUACACUCUUCUGUCAC	Cleavage	similar to UniRef100_A7QDX2 Cluster: Chromosome chr4 scaffold_83, whole genome shotgun sequence; n=1; Vitis vinifera|Rep: Chromosome chr4 scaffold_83, whole genome shotgun sequence - Vitis vinifera (Grape), complete
	bpe-miR156a-5p.Gs.ac	GTGACAGAAGAGAGTGAGC	DB908627	3	1	19	197	215	GUGACAGAAGAGAGUGAGC	:.::.:::::::.:::: :	GUUCGCUCUCUUUUGUCUC	Cleavage	similar to UniRef100_A7PV45 Cluster: Chromosome chr4 scaffold_32, whole genome shotgun sequence; n=1; Vitis vinifera|Rep: Chromosome chr4 scaffold_32, whole genome shotgun sequence - Vitis vinifera (Grape), partial (29%)
	bpe-miR156a-5p.Gs.ac	GTGACAGAAGAGAGTGAGC	TC170385	3	1	19	148	166	GUGACAGAAGAGAGUGAGC	:::..::::::::: :.::	GCUUGCUCUCUUCUCUUAC	Cleavage	homologue to UniRef100_A9V995 Cluster: Predicted protein; n=1; Monosiga brevicollis MX1|Rep: Predicted protein - Monosiga brevicollis MX1, partial (15%)
	bpe-miR156a-5p.Gs.ac	GTGACAGAAGAGAGTGAGC	CV257495	3	1	19	355	373	GUGACAGAAGAGAGUGAGC	:.:::.:::.:::: ::::	GUUCAUUCUUUUCUUUCAC	Cleavage
	bpe-miR156a-5p.Gs.ac	GTGACAGAAGAGAGTGAGC	DT469891	3	1	19	667	685	GUGACAGAAGAGAGUGAGC	:.:.:.:.:.::::::.::	GUUUAUUUUUUUCUGUUAC	Cleavage	UniRef100_A7RQ83 Cluster: Predicted protein; n=1; Nematostella vectensis|Rep: Predicted protein - Nematostella vectensis (Starlet sea anemone), partial (12%)
	bpe-miR156a-5p.Gs.ac	GTGACAGAAGAGAGTGAGC	TC154785	3	1	19	67	85	GUGACAGAAGAGAGUGAGC	::::.::::::::: :.:.	GCUCGCUCUCUUCUCUUAU	Cleavage	similar to UniRef100_Q2HRW5 Cluster: Syntaxin, N-terminal; n=1; Medicago truncatula|Rep: Syntaxin, N-terminal - Medicago truncatula (Barrel medic), partial (77%)
	bpe-miR156a-5p.Gs.ac	GTGACAGAAGAGAGTGAGC	TC168829	3	1	19	1246	1264	GUGACAGAAGAGAGUGAGC	::::.::::.::.: ::::	GCUCGCUCUUUUUUAUCAC	Cleavage	similar to UniRef100_A7QGW9 Cluster: Chromosome chr16 scaffold_94, whole genome shotgun sequence; n=1; Vitis vinifera|Rep: Chromosome chr16 scaffold_94, whole genome shotgun sequence - Vitis vinifera (Grape), partial (49%)
	bpe-miR156a-5p.Gs.ac	GTGACAGAAGAGAGTGAGC	TC162499	3	1	19	13	31	GUGACAGAAGAGAGUGAGC	::: :::::::.:::::.	CCUCUCUCUCUUUUGUCAU	Cleavage	similar to UniRef100_Q3E7D0 Cluster: Nucleobase-ascorbate transporter 12; n=3; Arabidopsis thaliana|Rep: Nucleobase-ascorbate transporter 12 - Arabidopsis thaliana (Mouse-ear cress), partial (8%)
	bpe-miR156a-5p.Gs.ac	GTGACAGAAGAGAGTGAGC	TC159843	3	1	19	34	52	GUGACAGAAGAGAGUGAGC	:::. :::::::.:::::	GCUUCCUCUCUUUUGUCAA	Cleavage	similar to UniRef100_P93484 Cluster: Vacuolar-sorting receptor 1 precursor; n=1; Pisum sativum|Rep: Vacuolar-sorting receptor 1 precursor - Pisum sativum (Garden pea), partial (31%)
	bpe-miR156a-5p.Gs.ac	GTGACAGAAGAGAGTGAGC	CA822666	3	1	19	230	248	GUGACAGAAGAGAGUGAGC	:::: :::::::::::. :	GCUCUCUCUCUUCUGUUCC	Cleavage	homologue to UniRef100_Q4SZ33 Cluster: Chromosome 21 SCAF11857, whole genome shotgun sequence; n=1; Tetraodon nigroviridis|Rep: Chromosome 21 SCAF11857, whole genome shotgun sequence - Tetraodon nigroviridis (Green puffer), partial (26%)
	bpe-miR156a-5p.Gs.ac	GTGACAGAAGAGAGTGAGC	TC157170	3	1	19	308	326	GUGACAGAAGAGAGUGAGC	:: ::::::.::.:::..:	GCACACUCUUUUUUGUUGC	Cleavage
	bpe-miR156a-5p.Gs.ac	GTGACAGAAGAGAGTGAGC	TC160004	3	1	19	324	342	GUGACAGAAGAGAGUGAGC	:::: .:.::::::::.:.	GCUCCUUUUCUUCUGUUAU	Cleavage	similar to UniRef100_A7PV36 Cluster: Chromosome chr4 scaffold_32, whole genome shotgun sequence; n=1; Vitis vinifera|Rep: Chromosome chr4 scaffold_32, whole genome shotgun sequence - Vitis vinifera (Grape), partial (20%)
	bpe-miR156a-5p.Gs.ac	GTGACAGAAGAGAGTGAGC	TC141987	3	1	19	242	260	GUGACAGAAGAGAGUGAGC	:::: .:.::::::::.:.	GCUCCUUUUCUUCUGUUAU	Cleavage	similar to UniRef100_A7PV36 Cluster: Chromosome chr4 scaffold_32, whole genome shotgun sequence; n=1; Vitis vinifera|Rep: Chromosome chr4 scaffold_32, whole genome shotgun sequence - Vitis vinifera (Grape), partial (32%)
	bpe-miR156a-5p.Gs.ac	GTGACAGAAGAGAGTGAGC	TC152593	3	1	19	242	260	GUGACAGAAGAGAGUGAGC	:::: .::::::.:::..:	GCUCCUUCUCUUUUGUUGC	Cleavage	similar to UniRef100_A7Q3D7 Cluster: Chromosome chr13 scaffold_48, whole genome shotgun sequence; n=1; Vitis vinifera|Rep: Chromosome chr13 scaffold_48, whole genome shotgun sequence - Vitis vinifera (Grape), partial (74%)
	bpe-miR156a-5p.Gs.c	GTGACAGAAGAGAGTGAGCA	TC170313	1.5	1	20	46	65	GUGACAGAAGAGAGUGAGCA	::::: :::::::::::::.	UGCUCUCUCUCUUCUGUCAU	Cleavage
	bpe-miR156a-5p.Gs.c	GTGACAGAAGAGAGTGAGCA	TC140194	1.5	1	20	392	411	GUGACAGAAGAGAGUGAGCA	::::: :::::::::::::.	UGCUCUCUCUCUUCUGUCAU	Cleavage	similar to UniRef100_A7PKG5 Cluster: Chromosome chr15 scaffold_19, whole genome shotgun sequence; n=1; Vitis vinifera|Rep: Chromosome chr15 scaffold_19, whole genome shotgun sequence - Vitis vinifera (Grape), partial (67%)
	bpe-miR156a-5p.Gs.c	GTGACAGAAGAGAGTGAGCA	TC138639	1.5	1	20	682	701	GUGACAGAAGAGAGUGAGCA	::::: :::::::::::::.	UGCUCUCUCUCUUCUGUCAU	Cleavage	similar to UniRef100_A7PJ70 Cluster: Chromosome chr12 scaffold_18, whole genome shotgun sequence; n=1; Vitis vinifera|Rep: Chromosome chr12 scaffold_18, whole genome shotgun sequence - Vitis vinifera (Grape), partial (70%)
	bpe-miR156a-5p.Gs.c	GTGACAGAAGAGAGTGAGCA	TC183201	1.5	1	20	906	925	GUGACAGAAGAGAGUGAGCA	::::: :::::::::::::.	UGCUCUCUCUCUUCUGUCAU	Cleavage	similar to UniRef100_Q52UU1 Cluster: Squamosa promoter binding-like protein; n=1; Betula platyphylla|Rep: Squamosa promoter binding-like protein - Betula platyphylla, partial (74%)
	bpe-miR156a-5p.Gs.c	GTGACAGAAGAGAGTGAGCA	TC179932	1.5	1	20	833	852	GUGACAGAAGAGAGUGAGCA	::::: :::::::::::::.	UGCUCUCUCUCUUCUGUCAU	Cleavage	similar to UniRef100_A7QP31 Cluster: Chromosome chr1 scaffold_136, whole genome shotgun sequence; n=1; Vitis vinifera|Rep: Chromosome chr1 scaffold_136, whole genome shotgun sequence - Vitis vinifera (Grape), partial (53%)
	bpe-miR156a-5p.Gs.c	GTGACAGAAGAGAGTGAGCA	TC181875	1.5	1	20	981	1000	GUGACAGAAGAGAGUGAGCA	::::: :::::::::::::.	UGCUCUCUCUCUUCUGUCAU	Cleavage	homologue to UniRef100_Q96035 Cluster: Cytochrome oxidase subunit 3; n=1; Magnolia grandiflora|Rep: Cytochrome oxidase subunit 3 - Magnolia grandiflora (Southern magnolia), partial (69%)
	bpe-miR156a-5p.Gs.c	GTGACAGAAGAGAGTGAGCA	TC155685	1.5	1	20	1163	1182	GUGACAGAAGAGAGUGAGCA	::::: :::::::::::::.	UGCUCUCUCUCUUCUGUCAU	Cleavage	similar to UniRef100_Q6YZE8 Cluster: Squamosa promoter-binding-like protein 16; n=1; Oryza sativa Japonica Group|Rep: Squamosa promoter-binding-like protein 16 - Oryza sativa subsp. japonica (Rice), partial (24%)
	bpe-miR156a-5p.Gs.c	GTGACAGAAGAGAGTGAGCA	TC140316	1.5	1	20	1079	1098	GUGACAGAAGAGAGUGAGCA	::::: :::::::::::::.	UGCUCUCUCUCUUCUGUCAU	Cleavage	similar to UniRef100_A7PKG5 Cluster: Chromosome chr15 scaffold_19, whole genome shotgun sequence; n=1; Vitis vinifera|Rep: Chromosome chr15 scaffold_19, whole genome shotgun sequence - Vitis vinifera (Grape), partial (72%)
	bpe-miR156a-5p.Gs.c	GTGACAGAAGAGAGTGAGCA	TC159682	2	1	20	43	62	GUGACAGAAGAGAGUGAGCA	::::: :::::::::::::	UGCUCUCUCUCUUCUGUCAA	Cleavage	similar to UniRef100_A7PFE5 Cluster: Chromosome chr11 scaffold_14, whole genome shotgun sequence; n=1; Vitis vinifera|Rep: Chromosome chr11 scaffold_14, whole genome shotgun sequence - Vitis vinifera (Grape), partial (6%)
	bpe-miR156a-5p.Gs.c	GTGACAGAAGAGAGTGAGCA	TC156238	2	1	20	629	648	GUGACAGAAGAGAGUGAGCA	::::: :::::::::::::	UGCUCUCUCUCUUCUGUCAA	Cleavage	similar to UniRef100_A7QPU0 Cluster: Chromosome chr10 scaffold_138, whole genome shotgun sequence; n=1; Vitis vinifera|Rep: Chromosome chr10 scaffold_138, whole genome shotgun sequence - Vitis vinifera (Grape), partial (69%)
	bpe-miR156a-5p.Gs.c	GTGACAGAAGAGAGTGAGCA	TC143610	2	1	20	620	639	GUGACAGAAGAGAGUGAGCA	::::: :::::::::::::	UGCUCUCUCUCUUCUGUCAA	Cleavage	similar to UniRef100_P93015 Cluster: Squamosa promoter-binding-like protein 3; n=1; Arabidopsis thaliana|Rep: Squamosa promoter-binding-like protein 3 - Arabidopsis thaliana (Mouse-ear cress), partial (70%)
	bpe-miR156a-5p.Gs.c	GTGACAGAAGAGAGTGAGCA	CN523533	2	1	20	539	558	GUGACAGAAGAGAGUGAGCA	::::: :::::::::::::	UGCUCUCUCUCUUCUGUCAA	Cleavage	homologue to UniRef100_A2YGR5 Cluster: Squamosa promoter-binding-like protein 12; n=1; Oryza sativa Indica Group|Rep: Squamosa promoter-binding-like protein 12 - Oryza sativa subsp. indica (Rice), partial (13%)
	bpe-miR156a-5p.Gs.c	GTGACAGAAGAGAGTGAGCA	TC162283	2	1	20	193	212	GUGACAGAAGAGAGUGAGCA	::::: :::::::::::::	UGCUCUCUCUCUUCUGUCAA	Cleavage	similar to UniRef100_A7PFE5 Cluster: Chromosome chr11 scaffold_14, whole genome shotgun sequence; n=1; Vitis vinifera|Rep: Chromosome chr11 scaffold_14, whole genome shotgun sequence - Vitis vinifera (Grape), partial (6%)
	bpe-miR156a-5p.Gs.c	GTGACAGAAGAGAGTGAGCA	TC140187	2	1	20	728	747	GUGACAGAAGAGAGUGAGCA	::::: :::::::::::::	UGCUCUCUCUCUUCUGUCAA	Cleavage	similar to UniRef100_Q84JE4 Cluster: Squamosa promoter binding like-protein; n=1; Betula pendula|Rep: Squamosa promoter binding like-protein - Betula verrucosa (White birch) (Betula pendula), partial (80%)
	bpe-miR156a-5p.Gs.c	GTGACAGAAGAGAGTGAGCA	TC139619	2	1	20	122	141	GUGACAGAAGAGAGUGAGCA	::::: :::::::::::::	UGCUCUCUCUCUUCUGUCAG	Cleavage	similar to UniRef100_Q94JW8 Cluster: Squamosa promoter-binding-like protein 6; n=1; Arabidopsis thaliana|Rep: Squamosa promoter-binding-like protein 6 - Arabidopsis thaliana (Mouse-ear cress), partial (9%)
	bpe-miR156a-5p.Gs.c	GTGACAGAAGAGAGTGAGCA	TC156260	2	1	20	647	666	GUGACAGAAGAGAGUGAGCA	::::: :::::::::::::	UGCUCCCUCUCUUCUGUCAA	Cleavage	weakly similar to UniRef100_A7QPU0 Cluster: Chromosome chr10 scaffold_138, whole genome shotgun sequence; n=1; Vitis vinifera|Rep: Chromosome chr10 scaffold_138, whole genome shotgun sequence - Vitis vinifera (Grape), partial (78%)
	bpe-miR156a-5p.Gs.c	GTGACAGAAGAGAGTGAGCA	TC167753	2	1	20	639	658	GUGACAGAAGAGAGUGAGCA	::::: :::::::::::::	UGCUCCCUCUCUUCUGUCAA	Cleavage	similar to UniRef100_Q5U8L4 Cluster: SBP transcription factor; n=1; Gossypium hirsutum|Rep: SBP transcription factor - Gossypium hirsutum (Upland cotton) (Gossypium mexicanum), partial (70%)
	bpe-miR156a-5p.Gs.c	GTGACAGAAGAGAGTGAGCA	TC161130	2	1	20	424	443	GUGACAGAAGAGAGUGAGCA	::::: :::::::::::::	UGCUCUCUCUCUUCUGUCAG	Cleavage	similar to UniRef100_Q94JW8 Cluster: Squamosa promoter-binding-like protein 6; n=1; Arabidopsis thaliana|Rep: Squamosa promoter-binding-like protein 6 - Arabidopsis thaliana (Mouse-ear cress), partial (12%)
	bpe-miR156a-5p.Gs.c	GTGACAGAAGAGAGTGAGCA	TC188289	2	1	20	482	501	GUGACAGAAGAGAGUGAGCA	::::: :::::::::::::	UGCUCUCUCUCUUCUGUCAA	Cleavage	similar to UniRef100_A7PFE5 Cluster: Chromosome chr11 scaffold_14, whole genome shotgun sequence; n=1; Vitis vinifera|Rep: Chromosome chr11 scaffold_14, whole genome shotgun sequence - Vitis vinifera (Grape), partial (13%)
	bpe-miR156a-5p.Gs.c	GTGACAGAAGAGAGTGAGCA	TC150948	2	1	20	343	362	GUGACAGAAGAGAGUGAGCA	::::: :::::::::::::	UGCUCUCUCUCUUCUGUCAA	Cleavage	similar to UniRef100_A7PFE5 Cluster: Chromosome chr11 scaffold_14, whole genome shotgun sequence; n=1; Vitis vinifera|Rep: Chromosome chr11 scaffold_14, whole genome shotgun sequence - Vitis vinifera (Grape), partial (10%)
	bpe-miR156a-5p.Gs.c	GTGACAGAAGAGAGTGAGCA	TC158039	2	1	20	697	716	GUGACAGAAGAGAGUGAGCA	::::: :::::::::::::	UGCUCUCUCUCUUCUGUCAA	Cleavage	similar to UniRef100_A7PFE5 Cluster: Chromosome chr11 scaffold_14, whole genome shotgun sequence; n=1; Vitis vinifera|Rep: Chromosome chr11 scaffold_14, whole genome shotgun sequence - Vitis vinifera (Grape), partial (49%)
	bpe-miR156a-5p.Gs.c	GTGACAGAAGAGAGTGAGCA	TC183825	2	1	20	402	421	GUGACAGAAGAGAGUGAGCA	::::: :::::::::::::	UGCUCUCUCUCUUCUGUCAA	Cleavage	similar to UniRef100_A7PFE5 Cluster: Chromosome chr11 scaffold_14, whole genome shotgun sequence; n=1; Vitis vinifera|Rep: Chromosome chr11 scaffold_14, whole genome shotgun sequence - Vitis vinifera (Grape), partial (11%)
	bpe-miR156a-5p.Gs.c	GTGACAGAAGAGAGTGAGCA	TC179911	2.5	1	20	453	472	GUGACAGAAGAGAGUGAGCA	::::::.::::::::.:.	GACUCACUUUCUUCUGUUAU	Cleavage	similar to UniRef100_Q6W2J5 Cluster: VDAC1.1; n=1; Lotus japonicus|Rep: VDAC1.1 - Lotus japonicus, partial (37%)
	bpe-miR156a-5p.Gs.c	GTGACAGAAGAGAGTGAGCA	TC145461	2.5	1	20	1023	1042	GUGACAGAAGAGAGUGAGCA	::::::.::::::::.:.	NNCUCACUUUCUUCUGUUAU	Cleavage	similar to UniRef100_Q6W2J5 Cluster: VDAC1.1; n=1; Lotus japonicus|Rep: VDAC1.1 - Lotus japonicus, complete
	bpe-miR156a-5p.Gs.c	GTGACAGAAGAGAGTGAGCA	TC146251	2.5	1	20	795	814	GUGACAGAAGAGAGUGAGCA	:::..::.::::::::::	AGCUUGCUUUCUUCUGUCAA	Cleavage	similar to UniRef100_A7QQJ3 Cluster: Chromosome undetermined scaffold_143, whole genome shotgun sequence; n=1; Vitis vinifera|Rep: Chromosome undetermined scaffold_143, whole genome shotgun sequence - Vitis vinifera (Grape), partial (51%)
	bpe-miR156a-5p.Gs.c	GTGACAGAAGAGAGTGAGCA	TC140389	2.5	1	20	1026	1045	GUGACAGAAGAGAGUGAGCA	::::::.::::::::.:.	GACUCACUUUCUUCUGUUAU	Cleavage	similar to UniRef100_Q6W2J5 Cluster: VDAC1.1; n=1; Lotus japonicus|Rep: VDAC1.1 - Lotus japonicus, partial (98%)
	bpe-miR156a-5p.Gs.c	GTGACAGAAGAGAGTGAGCA	TC156083	2.5	1	20	20	39	GUGACAGAAGAGAGUGAGCA	:::::::.:::::: :::.	AGCUCACUUUCUUCUUUCAU	Cleavage	weakly similar to UniRef100_Q84Q77 Cluster: 17.4 kDa class I heat shock protein 3; n=3; Oryza sativa|Rep: 17.4 kDa class I heat shock protein 3 - Oryza sativa subsp. japonica (Rice), partial (42%)
	bpe-miR156a-5p.Gs.c	GTGACAGAAGAGAGTGAGCA	TC157471	2.5	1	20	143	162	GUGACAGAAGAGAGUGAGCA	:::::::.:::::: :::.	AGCUCACUUUCUUCUUUCAU	Cleavage
	bpe-miR156a-5p.Gs.c	GTGACAGAAGAGAGTGAGCA	TC170385	3	1	20	147	166	GUGACAGAAGAGAGUGAGCA	::::..::::::::: :.::	UGCUUGCUCUCUUCUCUUAC	Cleavage	homologue to UniRef100_A9V995 Cluster: Predicted protein; n=1; Monosiga brevicollis MX1|Rep: Predicted protein - Monosiga brevicollis MX1, partial (15%)
	bpe-miR156a-5p.Gs.c	GTGACAGAAGAGAGTGAGCA	DT469891	3	1	20	666	685	GUGACAGAAGAGAGUGAGCA	::.:.:.:.:.::::::.::	UGUUUAUUUUUUUCUGUUAC	Cleavage	UniRef100_A7RQ83 Cluster: Predicted protein; n=1; Nematostella vectensis|Rep: Predicted protein - Nematostella vectensis (Starlet sea anemone), partial (12%)
	bpe-miR156a-5p.Gs.c	GTGACAGAAGAGAGTGAGCA	TC138813	3	1	20	41	60	GUGACAGAAGAGAGUGAGCA	:::::::::.:::::::	AGCUCACUCUUUUCUGUCCG	Cleavage	UniRef100_Q7EUR6 Cluster: AT4g05320/C17L7_240; n=8; core eudicotyledons|Rep: AT4g05320/C17L7_240 - Arabidopsis thaliana (Mouse-ear cress), partial (80%)
	bpe-miR156a-5p.Gs.c	GTGACAGAAGAGAGTGAGCA	TC154785	3	1	20	66	85	GUGACAGAAGAGAGUGAGCA	:::::.::::::::: :.:.	UGCUCGCUCUCUUCUCUUAU	Cleavage	similar to UniRef100_Q2HRW5 Cluster: Syntaxin, N-terminal; n=1; Medicago truncatula|Rep: Syntaxin, N-terminal - Medicago truncatula (Barrel medic), partial (77%)
	bpe-miR156a-5p.Gs.c	GTGACAGAAGAGAGTGAGCA	TC159843	3	1	20	33	52	GUGACAGAAGAGAGUGAGCA	::::. :::::::.:::::	UGCUUCCUCUCUUUUGUCAA	Cleavage	similar to UniRef100_P93484 Cluster: Vacuolar-sorting receptor 1 precursor; n=1; Pisum sativum|Rep: Vacuolar-sorting receptor 1 precursor - Pisum sativum (Garden pea), partial (31%)
	bpe-miR156a-5p.Gs.c	GTGACAGAAGAGAGTGAGCA	TC171875	3	1	20	1	20	GUGACAGAAGAGAGUGAGCA	: ::.:: ::::::::::::	UACUUACACUCUUCUGUCAC	Cleavage	homologue to UniRef100_A7QDX2 Cluster: Chromosome chr4 scaffold_83, whole genome shotgun sequence; n=1; Vitis vinifera|Rep: Chromosome chr4 scaffold_83, whole genome shotgun sequence - Vitis vinifera (Grape), partial (23%)
	bpe-miR156a-5p.Gs.c	GTGACAGAAGAGAGTGAGCA	AJ774637	3	1	20	273	292	GUGACAGAAGAGAGUGAGCA	::::::::.:::: ::::	CUCUCACUCUUUUCUUUCAC	Cleavage	similar to UniRef100_A7PF64 Cluster: Chromosome chr11 scaffold_13, whole genome shotgun sequence; n=1; Vitis vinifera|Rep: Chromosome chr11 scaffold_13, whole genome shotgun sequence - Vitis vinifera (Grape), partial (17%)
	bpe-miR156a-5p.Gs.c	GTGACAGAAGAGAGTGAGCA	TC138471	3	1	20	1	20	GUGACAGAAGAGAGUGAGCA	::.:: ::::::::::::	GACUUACACUCUUCUGUCAC	Cleavage	similar to UniRef100_A7QDX2 Cluster: Chromosome chr4 scaffold_83, whole genome shotgun sequence; n=1; Vitis vinifera|Rep: Chromosome chr4 scaffold_83, whole genome shotgun sequence - Vitis vinifera (Grape), complete
	bpe-miR156a-5p.Gs.c	GTGACAGAAGAGAGTGAGCA	DB908627	3	1	20	196	215	GUGACAGAAGAGAGUGAGCA	:.::.:::::::.:::: :	AGUUCGCUCUCUUUUGUCUC	Cleavage	similar to UniRef100_A7PV45 Cluster: Chromosome chr4 scaffold_32, whole genome shotgun sequence; n=1; Vitis vinifera|Rep: Chromosome chr4 scaffold_32, whole genome shotgun sequence - Vitis vinifera (Grape), partial (29%)
	bpe-miR156a-5p.Gs.c	GTGACAGAAGAGAGTGAGCA	CV257495	3	1	20	354	373	GUGACAGAAGAGAGUGAGCA	:.:::.:::.:::: ::::	GGUUCAUUCUUUUCUUUCAC	Cleavage
	bpe-miR156a-5p.Gs.c	GTGACAGAAGAGAGTGAGCA	TC168829	3	1	20	1245	1264	GUGACAGAAGAGAGUGAGCA	::::.::::.::.: ::::	GGCUCGCUCUUUUUUAUCAC	Cleavage	similar to UniRef100_A7QGW9 Cluster: Chromosome chr16 scaffold_94, whole genome shotgun sequence; n=1; Vitis vinifera|Rep: Chromosome chr16 scaffold_94, whole genome shotgun sequence - Vitis vinifera (Grape), partial (49%)
	bpe-miR156a-5p.Gs.c	GTGACAGAAGAGAGTGAGCA	TC162499	3	1	20	12	31	GUGACAGAAGAGAGUGAGCA	: ::: :::::::.:::::.	UCCUCUCUCUCUUUUGUCAU	Cleavage	similar to UniRef100_Q3E7D0 Cluster: Nucleobase-ascorbate transporter 12; n=3; Arabidopsis thaliana|Rep: Nucleobase-ascorbate transporter 12 - Arabidopsis thaliana (Mouse-ear cress), partial (8%)
	bpe-miR156a-5p.Gs.c	GTGACAGAAGAGAGTGAGCA	CA822666	3	1	20	229	248	GUGACAGAAGAGAGUGAGCA	:::: :::::::::::. :	AGCUCUCUCUCUUCUGUUCC	Cleavage	homologue to UniRef100_Q4SZ33 Cluster: Chromosome 21 SCAF11857, whole genome shotgun sequence; n=1; Tetraodon nigroviridis|Rep: Chromosome 21 SCAF11857, whole genome shotgun sequence - Tetraodon nigroviridis (Green puffer), partial (26%)
	bpe-miR156a-5p.Gs.c	GTGACAGAAGAGAGTGAGCA	TC157170	3	1	20	307	326	GUGACAGAAGAGAGUGAGCA	:: ::::::.::.:::..:	CGCACACUCUUUUUUGUUGC	Cleavage
	bpe-miR156a-5p.Gs.c	GTGACAGAAGAGAGTGAGCA	TC160004	3	1	20	323	342	GUGACAGAAGAGAGUGAGCA	:::: .:.::::::::.:.	CGCUCCUUUUCUUCUGUUAU	Cleavage	similar to UniRef100_A7PV36 Cluster: Chromosome chr4 scaffold_32, whole genome shotgun sequence; n=1; Vitis vinifera|Rep: Chromosome chr4 scaffold_32, whole genome shotgun sequence - Vitis vinifera (Grape), partial (20%)
	bpe-miR156a-5p.Gs.c	GTGACAGAAGAGAGTGAGCA	TC141987	3	1	20	241	260	GUGACAGAAGAGAGUGAGCA	:::: .:.::::::::.:.	CGCUCCUUUUCUUCUGUUAU	Cleavage	similar to UniRef100_A7PV36 Cluster: Chromosome chr4 scaffold_32, whole genome shotgun sequence; n=1; Vitis vinifera|Rep: Chromosome chr4 scaffold_32, whole genome shotgun sequence - Vitis vinifera (Grape), partial (32%)
	bpe-miR156a-5p.Gs.c	GTGACAGAAGAGAGTGAGCA	TC152593	3	1	20	241	260	GUGACAGAAGAGAGUGAGCA	:::: .::::::.:::..:	AGCUCCUUCUCUUUUGUUGC	Cleavage	similar to UniRef100_A7Q3D7 Cluster: Chromosome chr13 scaffold_48, whole genome shotgun sequence; n=1; Vitis vinifera|Rep: Chromosome chr13 scaffold_48, whole genome shotgun sequence - Vitis vinifera (Grape), partial (74%)
	bpe-miR156a-5p.TC	TGACAGAAGAGAGTGAGCACTC	TC138639	1	1	22	679	700	UGACAGAAGAGAGUGAGCACUC	:: ::::: :::::::::::::	GAUUGCUCUCUCUCUUCUGUCA	Cleavage	similar to UniRef100_A7PJ70 Cluster: Chromosome chr12 scaffold_18, whole genome shotgun sequence; n=1; Vitis vinifera|Rep: Chromosome chr12 scaffold_18, whole genome shotgun sequence - Vitis vinifera (Grape), partial (70%)
	bpe-miR156a-5p.TC	TGACAGAAGAGAGTGAGCACTC	TC183201	1	1	22	903	924	UGACAGAAGAGAGUGAGCACUC	:: ::::: :::::::::::::	GAUUGCUCUCUCUCUUCUGUCA	Cleavage	similar to UniRef100_Q52UU1 Cluster: Squamosa promoter binding-like protein; n=1; Betula platyphylla|Rep: Squamosa promoter binding-like protein - Betula platyphylla, partial (74%)
	bpe-miR156a-5p.TC	TGACAGAAGAGAGTGAGCACTC	TC181875	1	1	22	978	999	UGACAGAAGAGAGUGAGCACUC	:: ::::: :::::::::::::	GAUUGCUCUCUCUCUUCUGUCA	Cleavage	homologue to UniRef100_Q96035 Cluster: Cytochrome oxidase subunit 3; n=1; Magnolia grandiflora|Rep: Cytochrome oxidase subunit 3 - Magnolia grandiflora (Southern magnolia), partial (69%)
	bpe-miR156a-5p.TC	TGACAGAAGAGAGTGAGCACTC	TC158039	1	1	22	694	715	UGACAGAAGAGAGUGAGCACUC	: :::::: :::::::::::::	GCGUGCUCUCUCUCUUCUGUCA	Cleavage	similar to UniRef100_A7PFE5 Cluster: Chromosome chr11 scaffold_14, whole genome shotgun sequence; n=1; Vitis vinifera|Rep: Chromosome chr11 scaffold_14, whole genome shotgun sequence - Vitis vinifera (Grape), partial (49%)
	bpe-miR156a-5p.TC	TGACAGAAGAGAGTGAGCACTC	TC170313	1	1	22	43	64	UGACAGAAGAGAGUGAGCACUC	:::::: :::::::::::::	UUGUGCUCUCUCUCUUCUGUCA	Cleavage
	bpe-miR156a-5p.TC	TGACAGAAGAGAGTGAGCACTC	TC159682	1	1	22	40	61	UGACAGAAGAGAGUGAGCACUC	:::::: :::::::::::::	UCGUGCUCUCUCUCUUCUGUCA	Cleavage	similar to UniRef100_A7PFE5 Cluster: Chromosome chr11 scaffold_14, whole genome shotgun sequence; n=1; Vitis vinifera|Rep: Chromosome chr11 scaffold_14, whole genome shotgun sequence - Vitis vinifera (Grape), partial (6%)
	bpe-miR156a-5p.TC	TGACAGAAGAGAGTGAGCACTC	CN523533	1	1	22	536	557	UGACAGAAGAGAGUGAGCACUC	:::::: :::::::::::::	UCGUGCUCUCUCUCUUCUGUCA	Cleavage	homologue to UniRef100_A2YGR5 Cluster: Squamosa promoter-binding-like protein 12; n=1; Oryza sativa Indica Group|Rep: Squamosa promoter-binding-like protein 12 - Oryza sativa subsp. indica (Rice), partial (13%)
	bpe-miR156a-5p.TC	TGACAGAAGAGAGTGAGCACTC	TC162283	1	1	22	190	211	UGACAGAAGAGAGUGAGCACUC	:::::: :::::::::::::	UCGUGCUCUCUCUCUUCUGUCA	Cleavage	similar to UniRef100_A7PFE5 Cluster: Chromosome chr11 scaffold_14, whole genome shotgun sequence; n=1; Vitis vinifera|Rep: Chromosome chr11 scaffold_14, whole genome shotgun sequence - Vitis vinifera (Grape), partial (6%)
	bpe-miR156a-5p.TC	TGACAGAAGAGAGTGAGCACTC	TC139619	1	1	22	119	140	UGACAGAAGAGAGUGAGCACUC	:::::: :::::::::::::	CUGUGCUCUCUCUCUUCUGUCA	Cleavage	similar to UniRef100_Q94JW8 Cluster: Squamosa promoter-binding-like protein 6; n=1; Arabidopsis thaliana|Rep: Squamosa promoter-binding-like protein 6 - Arabidopsis thaliana (Mouse-ear cress), partial (9%)
	bpe-miR156a-5p.TC	TGACAGAAGAGAGTGAGCACTC	TC140194	1	1	22	389	410	UGACAGAAGAGAGUGAGCACUC	:::::: :::::::::::::	AUGUGCUCUCUCUCUUCUGUCA	Cleavage	similar to UniRef100_A7PKG5 Cluster: Chromosome chr15 scaffold_19, whole genome shotgun sequence; n=1; Vitis vinifera|Rep: Chromosome chr15 scaffold_19, whole genome shotgun sequence - Vitis vinifera (Grape), partial (67%)
	bpe-miR156a-5p.TC	TGACAGAAGAGAGTGAGCACTC	TC161130	1	1	22	421	442	UGACAGAAGAGAGUGAGCACUC	:::::: :::::::::::::	CUGUGCUCUCUCUCUUCUGUCA	Cleavage	similar to UniRef100_Q94JW8 Cluster: Squamosa promoter-binding-like protein 6; n=1; Arabidopsis thaliana|Rep: Squamosa promoter-binding-like protein 6 - Arabidopsis thaliana (Mouse-ear cress), partial (12%)
	bpe-miR156a-5p.TC	TGACAGAAGAGAGTGAGCACTC	TC188289	1	1	22	479	500	UGACAGAAGAGAGUGAGCACUC	:::::: :::::::::::::	UCGUGCUCUCUCUCUUCUGUCA	Cleavage	similar to UniRef100_A7PFE5 Cluster: Chromosome chr11 scaffold_14, whole genome shotgun sequence; n=1; Vitis vinifera|Rep: Chromosome chr11 scaffold_14, whole genome shotgun sequence - Vitis vinifera (Grape), partial (13%)
	bpe-miR156a-5p.TC	TGACAGAAGAGAGTGAGCACTC	TC179932	1	1	22	830	851	UGACAGAAGAGAGUGAGCACUC	:::::: :::::::::::::	CCGUGCUCUCUCUCUUCUGUCA	Cleavage	similar to UniRef100_A7QP31 Cluster: Chromosome chr1 scaffold_136, whole genome shotgun sequence; n=1; Vitis vinifera|Rep: Chromosome chr1 scaffold_136, whole genome shotgun sequence - Vitis vinifera (Grape), partial (53%)
	bpe-miR156a-5p.TC	TGACAGAAGAGAGTGAGCACTC	TC155685	1	1	22	1160	1181	UGACAGAAGAGAGUGAGCACUC	:::::: :::::::::::::	UUGUGCUCUCUCUCUUCUGUCA	Cleavage	similar to UniRef100_Q6YZE8 Cluster: Squamosa promoter-binding-like protein 16; n=1; Oryza sativa Japonica Group|Rep: Squamosa promoter-binding-like protein 16 - Oryza sativa subsp. japonica (Rice), partial (24%)
	bpe-miR156a-5p.TC	TGACAGAAGAGAGTGAGCACTC	TC150948	1	1	22	340	361	UGACAGAAGAGAGUGAGCACUC	:::::: :::::::::::::	UCGUGCUCUCUCUCUUCUGUCA	Cleavage	similar to UniRef100_A7PFE5 Cluster: Chromosome chr11 scaffold_14, whole genome shotgun sequence; n=1; Vitis vinifera|Rep: Chromosome chr11 scaffold_14, whole genome shotgun sequence - Vitis vinifera (Grape), partial (10%)
	bpe-miR156a-5p.TC	TGACAGAAGAGAGTGAGCACTC	TC183825	1	1	22	399	420	UGACAGAAGAGAGUGAGCACUC	:::::: :::::::::::::	UCGUGCUCUCUCUCUUCUGUCA	Cleavage	similar to UniRef100_A7PFE5 Cluster: Chromosome chr11 scaffold_14, whole genome shotgun sequence; n=1; Vitis vinifera|Rep: Chromosome chr11 scaffold_14, whole genome shotgun sequence - Vitis vinifera (Grape), partial (11%)
	bpe-miR156a-5p.TC	TGACAGAAGAGAGTGAGCACTC	TC140316	1	1	22	1076	1097	UGACAGAAGAGAGUGAGCACUC	:::::: :::::::::::::	AUGUGCUCUCUCUCUUCUGUCA	Cleavage	similar to UniRef100_A7PKG5 Cluster: Chromosome chr15 scaffold_19, whole genome shotgun sequence; n=1; Vitis vinifera|Rep: Chromosome chr15 scaffold_19, whole genome shotgun sequence - Vitis vinifera (Grape), partial (72%)
	bpe-miR156a-5p.TC	TGACAGAAGAGAGTGAGCACTC	TC156238	1	1	22	626	647	UGACAGAAGAGAGUGAGCACUC	::::: :::::::::::::	GCAUGCUCUCUCUCUUCUGUCA	Cleavage	similar to UniRef100_A7QPU0 Cluster: Chromosome chr10 scaffold_138, whole genome shotgun sequence; n=1; Vitis vinifera|Rep: Chromosome chr10 scaffold_138, whole genome shotgun sequence - Vitis vinifera (Grape), partial (69%)
	bpe-miR156a-5p.TC	TGACAGAAGAGAGTGAGCACTC	TC143610	1	1	22	617	638	UGACAGAAGAGAGUGAGCACUC	::::: :::::::::::::	GCAUGCUCUCUCUCUUCUGUCA	Cleavage	similar to UniRef100_P93015 Cluster: Squamosa promoter-binding-like protein 3; n=1; Arabidopsis thaliana|Rep: Squamosa promoter-binding-like protein 3 - Arabidopsis thaliana (Mouse-ear cress), partial (70%)
	bpe-miR156a-5p.TC	TGACAGAAGAGAGTGAGCACTC	TC140187	1	1	22	725	746	UGACAGAAGAGAGUGAGCACUC	::::: :::::::::::::	CCAUGCUCUCUCUCUUCUGUCA	Cleavage	similar to UniRef100_Q84JE4 Cluster: Squamosa promoter binding like-protein; n=1; Betula pendula|Rep: Squamosa promoter binding like-protein - Betula verrucosa (White birch) (Betula pendula), partial (80%)
	bpe-miR156a-5p.TC	TGACAGAAGAGAGTGAGCACTC	TC156260	1	1	22	644	665	UGACAGAAGAGAGUGAGCACUC	::::: :::::::::::::	GCAUGCUCCCUCUCUUCUGUCA	Cleavage	weakly similar to UniRef100_A7QPU0 Cluster: Chromosome chr10 scaffold_138, whole genome shotgun sequence; n=1; Vitis vinifera|Rep: Chromosome chr10 scaffold_138, whole genome shotgun sequence - Vitis vinifera (Grape), partial (78%)
	bpe-miR156a-5p.TC	TGACAGAAGAGAGTGAGCACTC	TC167753	1	1	22	636	657	UGACAGAAGAGAGUGAGCACUC	::::: :::::::::::::	GCAUGCUCCCUCUCUUCUGUCA	Cleavage	similar to UniRef100_Q5U8L4 Cluster: SBP transcription factor; n=1; Gossypium hirsutum|Rep: SBP transcription factor - Gossypium hirsutum (Upland cotton) (Gossypium mexicanum), partial (70%)
	bpe-miR156a-5p.TC	TGACAGAAGAGAGTGAGCACTC	TC159843	2	1	22	30	51	UGACAGAAGAGAGUGAGCACUC	::::. :::::::.:::::	UGAUGCUUCCUCUCUUUUGUCA	Cleavage	similar to UniRef100_P93484 Cluster: Vacuolar-sorting receptor 1 precursor; n=1; Pisum sativum|Rep: Vacuolar-sorting receptor 1 precursor - Pisum sativum (Garden pea), partial (31%)
	bpe-miR156a-5p.TC	TGACAGAAGAGAGTGAGCACTC	TC138813	2.5	1	22	38	59	UGACAGAAGAGAGUGAGCACUC	:::::::::.:::::::	UAAAGCUCACUCUUUUCUGUCC	Cleavage	UniRef100_Q7EUR6 Cluster: AT4g05320/C17L7_240; n=8; core eudicotyledons|Rep: AT4g05320/C17L7_240 - Arabidopsis thaliana (Mouse-ear cress), partial (80%)
	bpe-miR156a-5p.TC	TGACAGAAGAGAGTGAGCACTC	TC154785	2.5	1	22	63	84	UGACAGAAGAGAGUGAGCACUC	: :::::.::::::::: :.:	CACUGCUCGCUCUCUUCUCUUA	Cleavage	similar to UniRef100_Q2HRW5 Cluster: Syntaxin, N-terminal; n=1; Medicago truncatula|Rep: Syntaxin, N-terminal - Medicago truncatula (Barrel medic), partial (77%)
	bpe-miR156a-5p.TC	TGACAGAAGAGAGTGAGCACTC	TC146251	2.5	1	22	792	813	UGACAGAAGAGAGUGAGCACUC	:::..::.::::::::::	AUUAGCUUGCUUUCUUCUGUCA	Cleavage	similar to UniRef100_A7QQJ3 Cluster: Chromosome undetermined scaffold_143, whole genome shotgun sequence; n=1; Vitis vinifera|Rep: Chromosome undetermined scaffold_143, whole genome shotgun sequence - Vitis vinifera (Grape), partial (51%)
	bpe-miR156a-5p.TC	TGACAGAAGAGAGTGAGCACTC	TC167513	2.5	1	22	257	278	UGACAGAAGAGAGUGAGCACUC	:::::::::::::.: :.:	UUCUGCUCACUCUCUUUUUUUA	Cleavage	similar to UniRef100_Q9XGI4 Cluster: Cyclin A2; n=1; Solanum lycopersicum|Rep: Cyclin A2 - Solanum lycopersicum (Tomato) (Lycopersicon esculentum), partial (20%)
	bpe-miR156a-5p.TC	TGACAGAAGAGAGTGAGCACTC	TC162499	2.5	1	22	9	30	UGACAGAAGAGAGUGAGCACUC	: ::: :::::::.:::::	UCUUCCUCUCUCUCUUUUGUCA	Cleavage	similar to UniRef100_Q3E7D0 Cluster: Nucleobase-ascorbate transporter 12; n=3; Arabidopsis thaliana|Rep: Nucleobase-ascorbate transporter 12 - Arabidopsis thaliana (Mouse-ear cress), partial (8%)
	bpe-miR156a-5p.TC	TGACAGAAGAGAGTGAGCACTC	TC181170	3	1	22	1437	1458	UGACAGAAGAGAGUGAGCACUC	:: ::::..::::.:::::: :	GAUUGCUUGCUCUUUUCUGUAA	Cleavage	similar to UniRef100_A7NUV0 Cluster: Chromosome chr18 scaffold_1, whole genome shotgun sequence; n=1; Vitis vinifera|Rep: Chromosome chr18 scaffold_1, whole genome shotgun sequence - Vitis vinifera (Grape), partial (90%)
	bpe-miR156a-5p.TC	TGACAGAAGAGAGTGAGCACTC	AJ407505	3	1	22	247	267	UGACAGAAGAGAGUGAGCACUC	::::::::::::::: ::::	CUGUGCUCACUCUCUUC-GUCA	Cleavage	UniRef100_A7PEL7 Cluster: Chromosome chr11 scaffold_13 whole genome shotgun sequence; n=1; Vitis vinifera|Rep:, partial (1%)
	bpe-miR156a-5p.TC	TGACAGAAGAGAGTGAGCACTC	TC179911	3	1	22	450	471	UGACAGAAGAGAGUGAGCACUC	::::::.::::::::.:	CUAGACUCACUUUCUUCUGUUA	Cleavage	similar to UniRef100_Q6W2J5 Cluster: VDAC1.1; n=1; Lotus japonicus|Rep: VDAC1.1 - Lotus japonicus, partial (37%)
	bpe-miR156a-5p.TC	TGACAGAAGAGAGTGAGCACTC	TC145461	3	1	22	1020	1041	UGACAGAAGAGAGUGAGCACUC	::::::.::::::::.:	CUNNNCUCACUUUCUUCUGUUA	Cleavage	similar to UniRef100_Q6W2J5 Cluster: VDAC1.1; n=1; Lotus japonicus|Rep: VDAC1.1 - Lotus japonicus, complete
	bpe-miR156a-5p.TC	TGACAGAAGAGAGTGAGCACTC	TC140389	3	1	22	1023	1044	UGACAGAAGAGAGUGAGCACUC	::::::.::::::::.:	CUAGACUCACUUUCUUCUGUUA	Cleavage	similar to UniRef100_Q6W2J5 Cluster: VDAC1.1; n=1; Lotus japonicus|Rep: VDAC1.1 - Lotus japonicus, partial (98%)
	bpe-miR156a-5p.TC	TGACAGAAGAGAGTGAGCACTC	TC180503	3	1	22	246	267	UGACAGAAGAGAGUGAGCACUC	::.::..:.:::::::::	UCCUGUUCGUUUUCUUCUGUCC	Cleavage	weakly similar to UniRef100_A4BRK1 Cluster: Probable transporter; n=1; Nitrococcus mobilis Nb-231|Rep: Probable transporter - Nitrococcus mobilis Nb-231, partial (5%)
	bpe-miR156a-5p.TC	TGACAGAAGAGAGTGAGCACTC	TC156083	3	1	22	17	38	UGACAGAAGAGAGUGAGCACUC	:::::::.:::::: :::	CAAAGCUCACUUUCUUCUUUCA	Cleavage	weakly similar to UniRef100_Q84Q77 Cluster: 17.4 kDa class I heat shock protein 3; n=3; Oryza sativa|Rep: 17.4 kDa class I heat shock protein 3 - Oryza sativa subsp. japonica (Rice), partial (42%)
	bpe-miR156a-5p.TC	TGACAGAAGAGAGTGAGCACTC	TC157471	3	1	22	140	161	UGACAGAAGAGAGUGAGCACUC	:::::::.:::::: :::	CAAAGCUCACUUUCUUCUUUCA	Cleavage
	bpe-miR156a-5p.TC	TGACAGAAGAGAGTGAGCACTC	TC170385	3	1	22	144	165	UGACAGAAGAGAGUGAGCACUC	::::..::::::::: :.:	UCCUGCUUGCUCUCUUCUCUUA	Cleavage	homologue to UniRef100_A9V995 Cluster: Predicted protein; n=1; Monosiga brevicollis MX1|Rep: Predicted protein - Monosiga brevicollis MX1, partial (15%)
	bpe-miR156a-5p.TC	TGACAGAAGAGAGTGAGCACTC	TC147463	3	1	22	152	173	UGACAGAAGAGAGUGAGCACUC	::::..::::::::: :.:	UUCUGCUUGCUCUCUUCUAUUA	Cleavage	similar to UniRef100_A3IAY7 Cluster: Nitrogen fixation protein; n=1; Bacillus sp. B14905|Rep: Nitrogen fixation protein - Bacillus sp. B14905, partial (19%)
	bpe-miR156a-5p.TC	TGACAGAAGAGAGTGAGCACTC	DT469891	3	1	22	663	684	UGACAGAAGAGAGUGAGCACUC	::.:.:.:.:.::::::.:	GCAUGUUUAUUUUUUUCUGUUA	Cleavage	UniRef100_A7RQ83 Cluster: Predicted protein; n=1; Nematostella vectensis|Rep: Predicted protein - Nematostella vectensis (Starlet sea anemone), partial (12%)
	bpe-miR156a-5p.TC	TGACAGAAGAGAGTGAGCACTC	TC179956	3	1	22	1291	1312	UGACAGAAGAGAGUGAGCACUC	::::::::. :::.:::.:	UUCUGCUCACUUGCUUUUGUUA	Translation	similar to UniRef100_A7NUJ3 Cluster: Chromosome chr18 scaffold_1, whole genome shotgun sequence; n=1; Vitis vinifera|Rep: Chromosome chr18 scaffold_1, whole genome shotgun sequence - Vitis vinifera (Grape), partial (49%)
	bpe-miR156a-5p.TC	TGACAGAAGAGAGTGAGCACTC	DB876395	3	1	22	30	51	UGACAGAAGAGAGUGAGCACUC	::.:: ::::::::: :::	GUCUGUUCUCUCUCUUCUCUCA	Cleavage	similar to UniRef100_Q5BJ88 Cluster: Wasf1 protein; n=1; Xenopus tropicalis|Rep: Wasf1 protein - Xenopus tropicalis (Western clawed frog) (Silurana tropicalis), partial (5%)
	bpe-miR156a-5p.TC	TGACAGAAGAGAGTGAGCACTC	TC171875	3	1	19	1	19	UGACAGAAGAGAGUGAGCA	: ::.:: :::::::::::	UACUUACACUCUUCUGUCA	Cleavage	homologue to UniRef100_A7QDX2 Cluster: Chromosome chr4 scaffold_83, whole genome shotgun sequence; n=1; Vitis vinifera|Rep: Chromosome chr4 scaffold_83, whole genome shotgun sequence - Vitis vinifera (Grape), partial (23%)
	bpe-miR156a-5p.TC	TGACAGAAGAGAGTGAGCACTC	TC176385	3	1	22	504	525	UGACAGAAGAGAGUGAGCACUC	: : .: ::::::::::::.:	CAUUUUUAACUCUCUUCUGUUA	Cleavage	similar to UniRef100_A7PU50 Cluster: Chromosome chr7 scaffold_31, whole genome shotgun sequence; n=1; Vitis vinifera|Rep: Chromosome chr7 scaffold_31, whole genome shotgun sequence - Vitis vinifera (Grape), partial (6%)
	bpe-miR156a-5p.tgs.A	ACAGAAGAGAGTGAGCACA	TC170313	1.5	1	19	44	62	ACAGAAGAGAGUGAGCACA	::::::: :::::::::::	UGUGCUCUCUCUCUUCUGU	Cleavage
	bpe-miR156a-5p.tgs.A	ACAGAAGAGAGTGAGCACA	TC139619	1.5	1	19	120	138	ACAGAAGAGAGUGAGCACA	::::::: :::::::::::	UGUGCUCUCUCUCUUCUGU	Cleavage	similar to UniRef100_Q94JW8 Cluster: Squamosa promoter-binding-like protein 6; n=1; Arabidopsis thaliana|Rep: Squamosa promoter-binding-like protein 6 - Arabidopsis thaliana (Mouse-ear cress), partial (9%)
	bpe-miR156a-5p.tgs.A	ACAGAAGAGAGTGAGCACA	TC140194	1.5	1	19	390	408	ACAGAAGAGAGUGAGCACA	::::::: :::::::::::	UGUGCUCUCUCUCUUCUGU	Cleavage	similar to UniRef100_A7PKG5 Cluster: Chromosome chr15 scaffold_19, whole genome shotgun sequence; n=1; Vitis vinifera|Rep: Chromosome chr15 scaffold_19, whole genome shotgun sequence - Vitis vinifera (Grape), partial (67%)
	bpe-miR156a-5p.tgs.A	ACAGAAGAGAGTGAGCACA	TC161130	1.5	1	19	422	440	ACAGAAGAGAGUGAGCACA	::::::: :::::::::::	UGUGCUCUCUCUCUUCUGU	Cleavage	similar to UniRef100_Q94JW8 Cluster: Squamosa promoter-binding-like protein 6; n=1; Arabidopsis thaliana|Rep: Squamosa promoter-binding-like protein 6 - Arabidopsis thaliana (Mouse-ear cress), partial (12%)
	bpe-miR156a-5p.tgs.A	ACAGAAGAGAGTGAGCACA	TC155685	1.5	1	19	1161	1179	ACAGAAGAGAGUGAGCACA	::::::: :::::::::::	UGUGCUCUCUCUCUUCUGU	Cleavage	similar to UniRef100_Q6YZE8 Cluster: Squamosa promoter-binding-like protein 16; n=1; Oryza sativa Japonica Group|Rep: Squamosa promoter-binding-like protein 16 - Oryza sativa subsp. japonica (Rice), partial (24%)
	bpe-miR156a-5p.tgs.A	ACAGAAGAGAGTGAGCACA	TC140316	1.5	1	19	1077	1095	ACAGAAGAGAGUGAGCACA	::::::: :::::::::::	UGUGCUCUCUCUCUUCUGU	Cleavage	similar to UniRef100_A7PKG5 Cluster: Chromosome chr15 scaffold_19, whole genome shotgun sequence; n=1; Vitis vinifera|Rep: Chromosome chr15 scaffold_19, whole genome shotgun sequence - Vitis vinifera (Grape), partial (72%)
	bpe-miR156a-5p.tgs.A	ACAGAAGAGAGTGAGCACA	TC159682	2.5	1	19	41	59	ACAGAAGAGAGUGAGCACA	:::::: :::::::::::	CGUGCUCUCUCUCUUCUGU	Cleavage	similar to UniRef100_A7PFE5 Cluster: Chromosome chr11 scaffold_14, whole genome shotgun sequence; n=1; Vitis vinifera|Rep: Chromosome chr11 scaffold_14, whole genome shotgun sequence - Vitis vinifera (Grape), partial (6%)
	bpe-miR156a-5p.tgs.A	ACAGAAGAGAGTGAGCACA	CN523533	2.5	1	19	537	555	ACAGAAGAGAGUGAGCACA	:::::: :::::::::::	CGUGCUCUCUCUCUUCUGU	Cleavage	homologue to UniRef100_A2YGR5 Cluster: Squamosa promoter-binding-like protein 12; n=1; Oryza sativa Indica Group|Rep: Squamosa promoter-binding-like protein 12 - Oryza sativa subsp. indica (Rice), partial (13%)
	bpe-miR156a-5p.tgs.A	ACAGAAGAGAGTGAGCACA	TC162283	2.5	1	19	191	209	ACAGAAGAGAGUGAGCACA	:::::: :::::::::::	CGUGCUCUCUCUCUUCUGU	Cleavage	similar to UniRef100_A7PFE5 Cluster: Chromosome chr11 scaffold_14, whole genome shotgun sequence; n=1; Vitis vinifera|Rep: Chromosome chr11 scaffold_14, whole genome shotgun sequence - Vitis vinifera (Grape), partial (6%)
	bpe-miR156a-5p.tgs.A	ACAGAAGAGAGTGAGCACA	TC188289	2.5	1	19	480	498	ACAGAAGAGAGUGAGCACA	:::::: :::::::::::	CGUGCUCUCUCUCUUCUGU	Cleavage	similar to UniRef100_A7PFE5 Cluster: Chromosome chr11 scaffold_14, whole genome shotgun sequence; n=1; Vitis vinifera|Rep: Chromosome chr11 scaffold_14, whole genome shotgun sequence - Vitis vinifera (Grape), partial (13%)
	bpe-miR156a-5p.tgs.A	ACAGAAGAGAGTGAGCACA	TC179932	2.5	1	19	831	849	ACAGAAGAGAGUGAGCACA	:::::: :::::::::::	CGUGCUCUCUCUCUUCUGU	Cleavage	similar to UniRef100_A7QP31 Cluster: Chromosome chr1 scaffold_136, whole genome shotgun sequence; n=1; Vitis vinifera|Rep: Chromosome chr1 scaffold_136, whole genome shotgun sequence - Vitis vinifera (Grape), partial (53%)
	bpe-miR156a-5p.tgs.A	ACAGAAGAGAGTGAGCACA	TC150948	2.5	1	19	341	359	ACAGAAGAGAGUGAGCACA	:::::: :::::::::::	CGUGCUCUCUCUCUUCUGU	Cleavage	similar to UniRef100_A7PFE5 Cluster: Chromosome chr11 scaffold_14, whole genome shotgun sequence; n=1; Vitis vinifera|Rep: Chromosome chr11 scaffold_14, whole genome shotgun sequence - Vitis vinifera (Grape), partial (10%)
	bpe-miR156a-5p.tgs.A	ACAGAAGAGAGTGAGCACA	TC158039	2.5	1	19	695	713	ACAGAAGAGAGUGAGCACA	:::::: :::::::::::	CGUGCUCUCUCUCUUCUGU	Cleavage	similar to UniRef100_A7PFE5 Cluster: Chromosome chr11 scaffold_14, whole genome shotgun sequence; n=1; Vitis vinifera|Rep: Chromosome chr11 scaffold_14, whole genome shotgun sequence - Vitis vinifera (Grape), partial (49%)
	bpe-miR156a-5p.tgs.A	ACAGAAGAGAGTGAGCACA	TC183825	2.5	1	19	400	418	ACAGAAGAGAGUGAGCACA	:::::: :::::::::::	CGUGCUCUCUCUCUUCUGU	Cleavage	similar to UniRef100_A7PFE5 Cluster: Chromosome chr11 scaffold_14, whole genome shotgun sequence; n=1; Vitis vinifera|Rep: Chromosome chr11 scaffold_14, whole genome shotgun sequence - Vitis vinifera (Grape), partial (11%)
	bpe-miR156a-5p.tgs.A	ACAGAAGAGAGTGAGCACA	DT518516	2.5	1	19	578	596	ACAGAAGAGAGUGAGCACA	::::. ::::::::::::	UGUGUACACUCUCUUCUGC	Cleavage	similar to UniRef100_A7QC92 Cluster: Chromosome undetermined scaffold_77, whole genome shotgun sequence; n=1; Vitis vinifera|Rep: Chromosome undetermined scaffold_77, whole genome shotgun sequence - Vitis vinifera (Grape), partial (35%)
	bpe-miR156a-5p.tgs.A	ACAGAAGAGAGTGAGCACA	BU894131	3	1	19	369	387	ACAGAAGAGAGUGAGCACA	:::.:.:::.::::.:::	AGUGUUUACUUUCUUUUGU	Cleavage	similar to UniRef100_A7R523 Cluster: Chromosome undetermined scaffold_838, whole genome shotgun sequence; n=1; Vitis vinifera|Rep: Chromosome undetermined scaffold_838, whole genome shotgun sequence - Vitis vinifera (Grape), partial (14%)
	bpe-miR156a-5p.tgs.A	ACAGAAGAGAGTGAGCACA	CK114475	3	1	19	63	81	ACAGAAGAGAGUGAGCACA	: ::::..::::::::::	UCUGCUUGCUCUCUUCUGG	Cleavage
	bpe-miR156a-5p.tgs.A	ACAGAAGAGAGTGAGCACA	TC176697	3	1	19	289	307	ACAGAAGAGAGUGAGCACA	::::. ..:::::::.:::	UGUGUGUGCUCUCUUUUGU	Cleavage	homologue to UniRef100_A7QJF7 Cluster: Chromosome chr8 scaffold_106, whole genome shotgun sequence; n=1; Vitis vinifera|Rep: Chromosome chr8 scaffold_106, whole genome shotgun sequence - Vitis vinifera (Grape), partial (5%)
	bpe-miR156a-5p.tgs.A	ACAGAAGAGAGTGAGCACA	TC183661	3	1	19	220	238	ACAGAAGAGAGUGAGCACA	:: :.:..:::::::.:::	UGCGUUUGCUCUCUUUUGU	Cleavage	similar to UniRef100_A7PK29 Cluster: Chromosome chr15 scaffold_19, whole genome shotgun sequence; n=1; Vitis vinifera|Rep: Chromosome chr15 scaffold_19, whole genome shotgun sequence - Vitis vinifera (Grape), partial (12%)
	bpe-miR156a-5p.tgs.A	ACAGAAGAGAGTGAGCACA	CV261576	3	1	19	403	421	ACAGAAGAGAGUGAGCACA	::: ::::::: :::.:::	UGUUCUCACUCCCUUUUGU	Cleavage	UniRef100_A7NWG7 Cluster: Chromosome chr5 scaffold_2, whole genome shotgun sequence; n=1; Vitis vinifera|Rep: Chromosome chr5 scaffold_2, whole genome shotgun sequence - Vitis vinifera (Grape), partial (17%)
	bpe-miR156a-5p.tgs.A	ACAGAAGAGAGTGAGCACA	TC144664	3	1	19	164	182	ACAGAAGAGAGUGAGCACA	:::: :.:.:.:.::::::	UGUGAUUAUUUUUUUCUGU	Cleavage	UniRef100_A8NRV9 Cluster: Predicted protein; n=1; Coprinopsis cinerea okayama7#130|Rep: Predicted protein - Coprinopsis cinerea okayama7#130, partial (6%)
	bpe-miR156a-5p.tgs.A	ACAGAAGAGAGTGAGCACA	TC171630	3	1	19	126	144	ACAGAAGAGAGUGAGCACA	::: .:..:::::::.:::	UGUUUUUGCUCUCUUUUGU	Cleavage	weakly similar to UniRef100_A4BUW5 Cluster: Amino acid permease-associated region; n=1; Nitrococcus mobilis Nb-231|Rep: Amino acid permease-associated region - Nitrococcus mobilis Nb-231, partial (4%)
	bpe-miR156a-5p.tgs.A	ACAGAAGAGAGTGAGCACA	TC167513	3	1	19	258	276	ACAGAAGAGAGUGAGCACA	: :::::::::::::.: :	UCUGCUCACUCUCUUUUUU	Cleavage	similar to UniRef100_Q9XGI4 Cluster: Cyclin A2; n=1; Solanum lycopersicum|Rep: Cyclin A2 - Solanum lycopersicum (Tomato) (Lycopersicon esculentum), partial (20%)
	bpe-miR156a-5p.tgs.A	ACAGAAGAGAGTGAGCACA	TC157170	3	1	19	305	323	ACAGAAGAGAGUGAGCACA	:: :: ::::::.::.:::	UGCGCACACUCUUUUUUGU	Cleavage
	bpe-miR156a-5p.ts	GACAGAAGAGAGTGAGCAC	TC170313	1.5	1	19	45	63	GACAGAAGAGAGUGAGCAC	:::::: ::::::::::::	GUGCUCUCUCUCUUCUGUC	Cleavage
	bpe-miR156a-5p.ts	GACAGAAGAGAGTGAGCAC	TC159682	1.5	1	19	42	60	GACAGAAGAGAGUGAGCAC	:::::: ::::::::::::	GUGCUCUCUCUCUUCUGUC	Cleavage	similar to UniRef100_A7PFE5 Cluster: Chromosome chr11 scaffold_14, whole genome shotgun sequence; n=1; Vitis vinifera|Rep: Chromosome chr11 scaffold_14, whole genome shotgun sequence - Vitis vinifera (Grape), partial (6%)
	bpe-miR156a-5p.ts	GACAGAAGAGAGTGAGCAC	CN523533	1.5	1	19	538	556	GACAGAAGAGAGUGAGCAC	:::::: ::::::::::::	GUGCUCUCUCUCUUCUGUC	Cleavage	homologue to UniRef100_A2YGR5 Cluster: Squamosa promoter-binding-like protein 12; n=1; Oryza sativa Indica Group|Rep: Squamosa promoter-binding-like protein 12 - Oryza sativa subsp. indica (Rice), partial (13%)
	bpe-miR156a-5p.ts	GACAGAAGAGAGTGAGCAC	TC162283	1.5	1	19	192	210	GACAGAAGAGAGUGAGCAC	:::::: ::::::::::::	GUGCUCUCUCUCUUCUGUC	Cleavage	similar to UniRef100_A7PFE5 Cluster: Chromosome chr11 scaffold_14, whole genome shotgun sequence; n=1; Vitis vinifera|Rep: Chromosome chr11 scaffold_14, whole genome shotgun sequence - Vitis vinifera (Grape), partial (6%)
	bpe-miR156a-5p.ts	GACAGAAGAGAGTGAGCAC	TC139619	1.5	1	19	121	139	GACAGAAGAGAGUGAGCAC	:::::: ::::::::::::	GUGCUCUCUCUCUUCUGUC	Cleavage	similar to UniRef100_Q94JW8 Cluster: Squamosa promoter-binding-like protein 6; n=1; Arabidopsis thaliana|Rep: Squamosa promoter-binding-like protein 6 - Arabidopsis thaliana (Mouse-ear cress), partial (9%)
	bpe-miR156a-5p.ts	GACAGAAGAGAGTGAGCAC	TC140194	1.5	1	19	391	409	GACAGAAGAGAGUGAGCAC	:::::: ::::::::::::	GUGCUCUCUCUCUUCUGUC	Cleavage	similar to UniRef100_A7PKG5 Cluster: Chromosome chr15 scaffold_19, whole genome shotgun sequence; n=1; Vitis vinifera|Rep: Chromosome chr15 scaffold_19, whole genome shotgun sequence - Vitis vinifera (Grape), partial (67%)
	bpe-miR156a-5p.ts	GACAGAAGAGAGTGAGCAC	TC161130	1.5	1	19	423	441	GACAGAAGAGAGUGAGCAC	:::::: ::::::::::::	GUGCUCUCUCUCUUCUGUC	Cleavage	similar to UniRef100_Q94JW8 Cluster: Squamosa promoter-binding-like protein 6; n=1; Arabidopsis thaliana|Rep: Squamosa promoter-binding-like protein 6 - Arabidopsis thaliana (Mouse-ear cress), partial (12%)
	bpe-miR156a-5p.ts	GACAGAAGAGAGTGAGCAC	TC188289	1.5	1	19	481	499	GACAGAAGAGAGUGAGCAC	:::::: ::::::::::::	GUGCUCUCUCUCUUCUGUC	Cleavage	similar to UniRef100_A7PFE5 Cluster: Chromosome chr11 scaffold_14, whole genome shotgun sequence; n=1; Vitis vinifera|Rep: Chromosome chr11 scaffold_14, whole genome shotgun sequence - Vitis vinifera (Grape), partial (13%)
	bpe-miR156a-5p.ts	GACAGAAGAGAGTGAGCAC	TC179932	1.5	1	19	832	850	GACAGAAGAGAGUGAGCAC	:::::: ::::::::::::	GUGCUCUCUCUCUUCUGUC	Cleavage	similar to UniRef100_A7QP31 Cluster: Chromosome chr1 scaffold_136, whole genome shotgun sequence; n=1; Vitis vinifera|Rep: Chromosome chr1 scaffold_136, whole genome shotgun sequence - Vitis vinifera (Grape), partial (53%)
	bpe-miR156a-5p.ts	GACAGAAGAGAGTGAGCAC	TC155685	1.5	1	19	1162	1180	GACAGAAGAGAGUGAGCAC	:::::: ::::::::::::	GUGCUCUCUCUCUUCUGUC	Cleavage	similar to UniRef100_Q6YZE8 Cluster: Squamosa promoter-binding-like protein 16; n=1; Oryza sativa Japonica Group|Rep: Squamosa promoter-binding-like protein 16 - Oryza sativa subsp. japonica (Rice), partial (24%)
	bpe-miR156a-5p.ts	GACAGAAGAGAGTGAGCAC	TC150948	1.5	1	19	342	360	GACAGAAGAGAGUGAGCAC	:::::: ::::::::::::	GUGCUCUCUCUCUUCUGUC	Cleavage	similar to UniRef100_A7PFE5 Cluster: Chromosome chr11 scaffold_14, whole genome shotgun sequence; n=1; Vitis vinifera|Rep: Chromosome chr11 scaffold_14, whole genome shotgun sequence - Vitis vinifera (Grape), partial (10%)
	bpe-miR156a-5p.ts	GACAGAAGAGAGTGAGCAC	TC158039	1.5	1	19	696	714	GACAGAAGAGAGUGAGCAC	:::::: ::::::::::::	GUGCUCUCUCUCUUCUGUC	Cleavage	similar to UniRef100_A7PFE5 Cluster: Chromosome chr11 scaffold_14, whole genome shotgun sequence; n=1; Vitis vinifera|Rep: Chromosome chr11 scaffold_14, whole genome shotgun sequence - Vitis vinifera (Grape), partial (49%)
	bpe-miR156a-5p.ts	GACAGAAGAGAGTGAGCAC	TC183825	1.5	1	19	401	419	GACAGAAGAGAGUGAGCAC	:::::: ::::::::::::	GUGCUCUCUCUCUUCUGUC	Cleavage	similar to UniRef100_A7PFE5 Cluster: Chromosome chr11 scaffold_14, whole genome shotgun sequence; n=1; Vitis vinifera|Rep: Chromosome chr11 scaffold_14, whole genome shotgun sequence - Vitis vinifera (Grape), partial (11%)
	bpe-miR156a-5p.ts	GACAGAAGAGAGTGAGCAC	TC140316	1.5	1	19	1078	1096	GACAGAAGAGAGUGAGCAC	:::::: ::::::::::::	GUGCUCUCUCUCUUCUGUC	Cleavage	similar to UniRef100_A7PKG5 Cluster: Chromosome chr15 scaffold_19, whole genome shotgun sequence; n=1; Vitis vinifera|Rep: Chromosome chr15 scaffold_19, whole genome shotgun sequence - Vitis vinifera (Grape), partial (72%)
	bpe-miR156a-5p.ts	GACAGAAGAGAGTGAGCAC	TC138813	2.5	1	19	40	58	GACAGAAGAGAGUGAGCAC	:::::::::.:::::::	AAGCUCACUCUUUUCUGUC	Cleavage	UniRef100_Q7EUR6 Cluster: AT4g05320/C17L7_240; n=8; core eudicotyledons|Rep: AT4g05320/C17L7_240 - Arabidopsis thaliana (Mouse-ear cress), partial (80%)
	bpe-miR156a-5p.ts	GACAGAAGAGAGTGAGCAC	TC156238	2.5	1	19	628	646	GACAGAAGAGAGUGAGCAC	::::: ::::::::::::	AUGCUCUCUCUCUUCUGUC	Cleavage	similar to UniRef100_A7QPU0 Cluster: Chromosome chr10 scaffold_138, whole genome shotgun sequence; n=1; Vitis vinifera|Rep: Chromosome chr10 scaffold_138, whole genome shotgun sequence - Vitis vinifera (Grape), partial (69%)
	bpe-miR156a-5p.ts	GACAGAAGAGAGTGAGCAC	TC143610	2.5	1	19	619	637	GACAGAAGAGAGUGAGCAC	::::: ::::::::::::	AUGCUCUCUCUCUUCUGUC	Cleavage	similar to UniRef100_P93015 Cluster: Squamosa promoter-binding-like protein 3; n=1; Arabidopsis thaliana|Rep: Squamosa promoter-binding-like protein 3 - Arabidopsis thaliana (Mouse-ear cress), partial (70%)
	bpe-miR156a-5p.ts	GACAGAAGAGAGTGAGCAC	TC140187	2.5	1	19	727	745	GACAGAAGAGAGUGAGCAC	::::: ::::::::::::	AUGCUCUCUCUCUUCUGUC	Cleavage	similar to UniRef100_Q84JE4 Cluster: Squamosa promoter binding like-protein; n=1; Betula pendula|Rep: Squamosa promoter binding like-protein - Betula verrucosa (White birch) (Betula pendula), partial (80%)
	bpe-miR156a-5p.ts	GACAGAAGAGAGTGAGCAC	TC156260	2.5	1	19	646	664	GACAGAAGAGAGUGAGCAC	::::: ::::::::::::	AUGCUCCCUCUCUUCUGUC	Cleavage	weakly similar to UniRef100_A7QPU0 Cluster: Chromosome chr10 scaffold_138, whole genome shotgun sequence; n=1; Vitis vinifera|Rep: Chromosome chr10 scaffold_138, whole genome shotgun sequence - Vitis vinifera (Grape), partial (78%)
	bpe-miR156a-5p.ts	GACAGAAGAGAGTGAGCAC	TC167753	2.5	1	19	638	656	GACAGAAGAGAGUGAGCAC	::::: ::::::::::::	AUGCUCCCUCUCUUCUGUC	Cleavage	similar to UniRef100_Q5U8L4 Cluster: SBP transcription factor; n=1; Gossypium hirsutum|Rep: SBP transcription factor - Gossypium hirsutum (Upland cotton) (Gossypium mexicanum), partial (70%)
	bpe-miR156a-5p.ts	GACAGAAGAGAGTGAGCAC	TC138639	2.5	1	19	681	699	GACAGAAGAGAGUGAGCAC	::::: ::::::::::::	UUGCUCUCUCUCUUCUGUC	Cleavage	similar to UniRef100_A7PJ70 Cluster: Chromosome chr12 scaffold_18, whole genome shotgun sequence; n=1; Vitis vinifera|Rep: Chromosome chr12 scaffold_18, whole genome shotgun sequence - Vitis vinifera (Grape), partial (70%)
	bpe-miR156a-5p.ts	GACAGAAGAGAGTGAGCAC	TC183201	2.5	1	19	905	923	GACAGAAGAGAGUGAGCAC	::::: ::::::::::::	UUGCUCUCUCUCUUCUGUC	Cleavage	similar to UniRef100_Q52UU1 Cluster: Squamosa promoter binding-like protein; n=1; Betula platyphylla|Rep: Squamosa promoter binding-like protein - Betula platyphylla, partial (74%)
	bpe-miR156a-5p.ts	GACAGAAGAGAGTGAGCAC	TC181875	2.5	1	19	980	998	GACAGAAGAGAGUGAGCAC	::::: ::::::::::::	UUGCUCUCUCUCUUCUGUC	Cleavage	homologue to UniRef100_Q96035 Cluster: Cytochrome oxidase subunit 3; n=1; Magnolia grandiflora|Rep: Cytochrome oxidase subunit 3 - Magnolia grandiflora (Southern magnolia), partial (69%)
	bpe-miR156a-5p.ts	GACAGAAGAGAGTGAGCAC	TC164700	2.5	1	19	126	144	GACAGAAGAGAGUGAGCAC	:::.::: :::.:::::::	GUGUUCAGUCUUUUCUGUC	Cleavage	weakly similar to UniRef100_A7PVY1 Cluster: Chromosome chr8 scaffold_34, whole genome shotgun sequence; n=1; Vitis vinifera|Rep: Chromosome chr8 scaffold_34, whole genome shotgun sequence - Vitis vinifera (Grape), partial (7%)
	bpe-miR156a-5p.ts	GACAGAAGAGAGTGAGCAC	TC180503	3	1	19	248	266	GACAGAAGAGAGUGAGCAC	::.::..:.:::::::::	CUGUUCGUUUUCUUCUGUC	Cleavage	weakly similar to UniRef100_A4BRK1 Cluster: Probable transporter; n=1; Nitrococcus mobilis Nb-231|Rep: Probable transporter - Nitrococcus mobilis Nb-231, partial (5%)
	bpe-miR156a-5p.ts	GACAGAAGAGAGTGAGCAC	BU894131	3	1	19	370	388	GACAGAAGAGAGUGAGCAC	:::.:.:::.::::.:::	GUGUUUACUUUCUUUUGUA	Cleavage	similar to UniRef100_A7R523 Cluster: Chromosome undetermined scaffold_838, whole genome shotgun sequence; n=1; Vitis vinifera|Rep: Chromosome undetermined scaffold_838, whole genome shotgun sequence - Vitis vinifera (Grape), partial (14%)
	bpe-miR156a-5p.ts	GACAGAAGAGAGTGAGCAC	AJ407505	3	1	19	249	266	GACAGAAGAGAGUGAGCAC	::::::::::::::: :::	GUGCUCACUCUCUUC-GUC	Cleavage	UniRef100_A7PEL7 Cluster: Chromosome chr11 scaffold_13 whole genome shotgun sequence; n=1; Vitis vinifera|Rep:, partial (1%)
	bpe-miR156a-5p.ts	GACAGAAGAGAGTGAGCAC	CX173964	3	1	19	27	45	GACAGAAGAGAGUGAGCAC	:: .:...:::::::::::	GUCUUUGUUCUCUUCUGUC	Cleavage	similar to UniRef100_Q84TL2 Cluster: Phosphoglycerate kinase; n=1; Populus tremuloides|Rep: Phosphoglycerate kinase - Populus tremuloides (Quaking aspen), partial (41%)
	bpe-miR156a-5p.ts	GACAGAAGAGAGTGAGCAC	TC182061	3	1	19	600	618	GACAGAAGAGAGUGAGCAC	:::. ::.:.:.:::::::	GUGUGCAUUUUUUUCUGUC	Cleavage	similar to UniRef100_P62458 Cluster: Histidinol dehydrogenase; n=1; Leptospira interrogans serovar Copenhageni|Rep: Histidinol dehydrogenase - Leptospira interrogans serogroup Icterohaemorrhagiae serovarcopenhageni, partial (5%)
	bpe-miR156a-5p.ts	GACAGAAGAGAGTGAGCAC	TC168182	3	1	19	965	983	GACAGAAGAGAGUGAGCAC	:: .::: :::::::::::	GUUUUCAAUCUCUUCUGUC	Cleavage	similar to UniRef100_A7QYP0 Cluster: Chromosome undetermined scaffold_252, whole genome shotgun sequence; n=1; Vitis vinifera|Rep: Chromosome undetermined scaffold_252, whole genome shotgun sequence - Vitis vinifera (Grape), partial (6%)
	bpe-miR156a-5p.ts.A2T.C3G.A4C.G5T.A6C.G8C.A9T.G10C.A11T.G12C.G14T.A15C.G16T.C17G.A18T	GTGCTCACTCTCTTCTGTC	CK092224	0.5	1	19	359	377	GUGCUCACUCUCUUCUGUC	:::::::::::::::::.:	GACAGAAGAGAGUGAGCGC	Cleavage	homologue to UniRef100_A6FZZ0 Cluster: Trk active potasium channel; n=1; Plesiocystis pacifica SIR-1|Rep: Trk active potasium, partial (2%)
	bpe-miR156a-5p.ts.A2T.C3G.A4C.G5T.A6C.G8C.A9T.G10C.A11T.G12C.G14T.A15C.G16T.C17G.A18T	GTGCTCACTCTCTTCTGTC	DN489113	2.5	1	19	247	265	GUGCUCACUCUCUUCUGUC	:::::::::::: :::::	GACAGAAGAGAGAGAGCAA	Cleavage	similar to UniRef100_A7PJ70 Cluster: Chromosome chr12 scaffold_18, whole genome shotgun sequence; n=1; Vitis vinifera|Rep: Chromosome chr12 scaffold_18, whole genome shotgun sequence - Vitis vinifera (Grape), partial (47%)
	bpe-miR156a-5p.ts.A2T.C3G.A4C.G5T.A6C.G8C.A9T.G10C.A11T.G12C.G14T.A15C.G16T.C17G.A18T	GTGCTCACTCTCTTCTGTC	DB882925	2.5	1	19	123	141	GUGCUCACUCUCUUCUGUC	:: ::::::::: ::::::	GAGAGAAGAGAGAGAGCAC	Cleavage	similar to UniRef100_Q18QW0 Cluster: Methyl-accepting chemotaxis sensory transducer precursor; n=2; Desulfitobacterium hafniense|Rep: Methyl-accepting chemotaxis sensory transducer precursor - Desulfitobacterium hafniense (strain DCB-2), partial (5%)
	bpe-miR156a-5p.ts.A2T.C3G.A4C.G5T.A6C.G8C.A9T.G10C.A11T.G12C.G14T.A15C.G16T.C17G.A18T	GTGCTCACTCTCTTCTGTC	TC141811	3	1	19	371	389	GUGCUCACUCUCUUCUGUC	.::::::::::::.:::	UGCAGAAGAGAGUGGGCAA	Cleavage	similar to UniRef100_A7PFH9 Cluster: Chromosome chr11 scaffold_14, whole genome shotgun sequence; n=1; Vitis vinifera|Rep: Chromosome chr11 scaffold_14, whole genome shotgun sequence - Vitis vinifera (Grape), partial (53%)
	bpe-miR156a-5p.ts.A2T.C3G.A4C.G5T.A6C.G8C.A9T.G10C.A11T.G12C.G14T.A15C.G16T.C17G.A18T	GTGCTCACTCTCTTCTGTC	TC154585	3	1	19	435	453	GUGCUCACUCUCUUCUGUC	.::::::::::::.:::	UGCAGAAGAGAGUGGGCAA	Cleavage	similar to UniRef100_A7PFH9 Cluster: Chromosome chr11 scaffold_14, whole genome shotgun sequence; n=1; Vitis vinifera|Rep: Chromosome chr11 scaffold_14, whole genome shotgun sequence - Vitis vinifera (Grape), partial (76%)
	bpe-miR156a-5p.ts.A2T.C3G.A4C.G5T.A6C.G8C.A9T.G10C.A11T.G12C.G14T.A15C.G16T.C17G.A18T	GTGCTCACTCTCTTCTGTC	TC139409	3	1	19	422	440	GUGCUCACUCUCUUCUGUC	.::::::::::::.:::	UGCAGAAGAGAGUGGGCAA	Cleavage	similar to UniRef100_A7PFH9 Cluster: Chromosome chr11 scaffold_14, whole genome shotgun sequence; n=1; Vitis vinifera|Rep: Chromosome chr11 scaffold_14, whole genome shotgun sequence - Vitis vinifera (Grape), partial (86%)
	bpe-miR156a-5p.ts.A2T.C3G.A4C.G5T.A6C.G8C.A9T.G10C.A11T.G12C.G14T.A15C.G16T.C17G.A18T	GTGCTCACTCTCTTCTGTC	CX184224	3	1	19	602	620	GUGCUCACUCUCUUCUGUC	:..:::::::::::::. :	GGUAGAAGAGAGUGAGUCC	Cleavage	similar to UniRef100_A7PUT3 Cluster: Chromosome chr4 scaffold_32, whole genome shotgun sequence; n=1; Vitis vinifera|Rep: Chromosome chr4 scaffold_32, whole genome shotgun sequence - Vitis vinifera (Grape), partial (23%)
	bpe-miR156a-5p.ts.A2T.C3G.A4C.G5T.A6C.G8C.A9T.G10C.A11T.G12C.G14T.A15C.G16T.C17G.A18T	GTGCTCACTCTCTTCTGTC	BU827954	3	1	19	55	73	GUGCUCACUCUCUUCUGUC	:: .::::::::::::.:	GAAGGAAGAGAGUGAGUAG	Cleavage
	bpe-miR156a-5p.ts.A2T.C3G.A4C.G5T.A6C.G8C.A9T.G10C.A11T.G12C.G14T.A15C.G16T.C17G.A18T	GTGCTCACTCTCTTCTGTC	TC177643	3	1	19	689	707	GUGCUCACUCUCUUCUGUC	: :::.:::::::::::.	AAAAGAGGAGAGUGAGCAU	Cleavage	similar to UniRef100_A7QT48 Cluster: Chromosome undetermined scaffold_165, whole genome shotgun sequence; n=1; Vitis vinifera|Rep: Chromosome undetermined scaffold_165, whole genome shotgun sequence - Vitis vinifera (Grape), partial (40%)
	bpe-miR156a-5p.ts.A2T.C3G.A4C.G5T.A6C.G8C.A9T.G10C.A11T.G12C.G14T.A15C.G16T.C17G.A18T	GTGCTCACTCTCTTCTGTC	TC152430	3	1	19	401	419	GUGCUCACUCUCUUCUGUC	:: :::::::::::: ::.	GAAAGAAGAGAGUGAUCAU	Cleavage	similar to UniRef100_A7PHK6 Cluster: Chromosome chr17 scaffold_16, whole genome shotgun sequence; n=1; Vitis vinifera|Rep: Chromosome chr17 scaffold_16, whole genome shotgun sequence - Vitis vinifera (Grape), partial (17%)
	bpe-miR156a-5p.ts.AG	GACAGAAGAGAGTGAGCACAG	TC139619	1.5	1	21	119	139	GACAGAAGAGAGUGAGCACAG	:::::::: ::::::::::::	CUGUGCUCUCUCUCUUCUGUC	Cleavage	similar to UniRef100_Q94JW8 Cluster: Squamosa promoter-binding-like protein 6; n=1; Arabidopsis thaliana|Rep: Squamosa promoter-binding-like protein 6 - Arabidopsis thaliana (Mouse-ear cress), partial (9%)
	bpe-miR156a-5p.ts.AG	GACAGAAGAGAGTGAGCACAG	TC161130	1.5	1	21	421	441	GACAGAAGAGAGUGAGCACAG	:::::::: ::::::::::::	CUGUGCUCUCUCUCUUCUGUC	Cleavage	similar to UniRef100_Q94JW8 Cluster: Squamosa promoter-binding-like protein 6; n=1; Arabidopsis thaliana|Rep: Squamosa promoter-binding-like protein 6 - Arabidopsis thaliana (Mouse-ear cress), partial (12%)
	bpe-miR156a-5p.ts.AG	GACAGAAGAGAGTGAGCACAG	TC170313	1.5	1	21	43	63	GACAGAAGAGAGUGAGCACAG	.::::::: ::::::::::::	UUGUGCUCUCUCUCUUCUGUC	Cleavage
	bpe-miR156a-5p.ts.AG	GACAGAAGAGAGTGAGCACAG	TC155685	1.5	1	21	1160	1180	GACAGAAGAGAGUGAGCACAG	.::::::: ::::::::::::	UUGUGCUCUCUCUCUUCUGUC	Cleavage	similar to UniRef100_Q6YZE8 Cluster: Squamosa promoter-binding-like protein 16; n=1; Oryza sativa Japonica Group|Rep: Squamosa promoter-binding-like protein 16 - Oryza sativa subsp. japonica (Rice), partial (24%)
	bpe-miR156a-5p.ts.AG	GACAGAAGAGAGTGAGCACAG	TC140194	1.5	1	21	389	409	GACAGAAGAGAGUGAGCACAG	::::::: ::::::::::::	AUGUGCUCUCUCUCUUCUGUC	Cleavage	similar to UniRef100_A7PKG5 Cluster: Chromosome chr15 scaffold_19, whole genome shotgun sequence; n=1; Vitis vinifera|Rep: Chromosome chr15 scaffold_19, whole genome shotgun sequence - Vitis vinifera (Grape), partial (67%)
	bpe-miR156a-5p.ts.AG	GACAGAAGAGAGTGAGCACAG	TC140316	1.5	1	21	1076	1096	GACAGAAGAGAGUGAGCACAG	::::::: ::::::::::::	AUGUGCUCUCUCUCUUCUGUC	Cleavage	similar to UniRef100_A7PKG5 Cluster: Chromosome chr15 scaffold_19, whole genome shotgun sequence; n=1; Vitis vinifera|Rep: Chromosome chr15 scaffold_19, whole genome shotgun sequence - Vitis vinifera (Grape), partial (72%)
	bpe-miR156a-5p.ts.AG	GACAGAAGAGAGTGAGCACAG	TC179932	1.5	1	21	830	850	GACAGAAGAGAGUGAGCACAG	: :::::: ::::::::::::	CCGUGCUCUCUCUCUUCUGUC	Cleavage	similar to UniRef100_A7QP31 Cluster: Chromosome chr1 scaffold_136, whole genome shotgun sequence; n=1; Vitis vinifera|Rep: Chromosome chr1 scaffold_136, whole genome shotgun sequence - Vitis vinifera (Grape), partial (53%)
	bpe-miR156a-5p.ts.AG	GACAGAAGAGAGTGAGCACAG	TC159682	1.5	1	21	40	60	GACAGAAGAGAGUGAGCACAG	:::::: ::::::::::::	UCGUGCUCUCUCUCUUCUGUC	Cleavage	similar to UniRef100_A7PFE5 Cluster: Chromosome chr11 scaffold_14, whole genome shotgun sequence; n=1; Vitis vinifera|Rep: Chromosome chr11 scaffold_14, whole genome shotgun sequence - Vitis vinifera (Grape), partial (6%)
	bpe-miR156a-5p.ts.AG	GACAGAAGAGAGTGAGCACAG	CN523533	1.5	1	21	536	556	GACAGAAGAGAGUGAGCACAG	:::::: ::::::::::::	UCGUGCUCUCUCUCUUCUGUC	Cleavage	homologue to UniRef100_A2YGR5 Cluster: Squamosa promoter-binding-like protein 12; n=1; Oryza sativa Indica Group|Rep: Squamosa promoter-binding-like protein 12 - Oryza sativa subsp. indica (Rice), partial (13%)
	bpe-miR156a-5p.ts.AG	GACAGAAGAGAGTGAGCACAG	TC162283	1.5	1	21	190	210	GACAGAAGAGAGUGAGCACAG	:::::: ::::::::::::	UCGUGCUCUCUCUCUUCUGUC	Cleavage	similar to UniRef100_A7PFE5 Cluster: Chromosome chr11 scaffold_14, whole genome shotgun sequence; n=1; Vitis vinifera|Rep: Chromosome chr11 scaffold_14, whole genome shotgun sequence - Vitis vinifera (Grape), partial (6%)
	bpe-miR156a-5p.ts.AG	GACAGAAGAGAGTGAGCACAG	TC188289	1.5	1	21	479	499	GACAGAAGAGAGUGAGCACAG	:::::: ::::::::::::	UCGUGCUCUCUCUCUUCUGUC	Cleavage	similar to UniRef100_A7PFE5 Cluster: Chromosome chr11 scaffold_14, whole genome shotgun sequence; n=1; Vitis vinifera|Rep: Chromosome chr11 scaffold_14, whole genome shotgun sequence - Vitis vinifera (Grape), partial (13%)
	bpe-miR156a-5p.ts.AG	GACAGAAGAGAGTGAGCACAG	TC150948	1.5	1	21	340	360	GACAGAAGAGAGUGAGCACAG	:::::: ::::::::::::	UCGUGCUCUCUCUCUUCUGUC	Cleavage	similar to UniRef100_A7PFE5 Cluster: Chromosome chr11 scaffold_14, whole genome shotgun sequence; n=1; Vitis vinifera|Rep: Chromosome chr11 scaffold_14, whole genome shotgun sequence - Vitis vinifera (Grape), partial (10%)
	bpe-miR156a-5p.ts.AG	GACAGAAGAGAGTGAGCACAG	TC158039	1.5	1	21	694	714	GACAGAAGAGAGUGAGCACAG	:::::: ::::::::::::	GCGUGCUCUCUCUCUUCUGUC	Cleavage	similar to UniRef100_A7PFE5 Cluster: Chromosome chr11 scaffold_14, whole genome shotgun sequence; n=1; Vitis vinifera|Rep: Chromosome chr11 scaffold_14, whole genome shotgun sequence - Vitis vinifera (Grape), partial (49%)
	bpe-miR156a-5p.ts.AG	GACAGAAGAGAGTGAGCACAG	TC183825	1.5	1	21	399	419	GACAGAAGAGAGUGAGCACAG	:::::: ::::::::::::	UCGUGCUCUCUCUCUUCUGUC	Cleavage	similar to UniRef100_A7PFE5 Cluster: Chromosome chr11 scaffold_14, whole genome shotgun sequence; n=1; Vitis vinifera|Rep: Chromosome chr11 scaffold_14, whole genome shotgun sequence - Vitis vinifera (Grape), partial (11%)
	bpe-miR156a-5p.ts.AG	GACAGAAGAGAGTGAGCACAG	TC138813	2.5	1	21	38	58	GACAGAAGAGAGUGAGCACAG	:::::::::.:::::::	UAAAGCUCACUCUUUUCUGUC	Cleavage	UniRef100_Q7EUR6 Cluster: AT4g05320/C17L7_240; n=8; core eudicotyledons|Rep: AT4g05320/C17L7_240 - Arabidopsis thaliana (Mouse-ear cress), partial (80%)
	bpe-miR156a-5p.ts.AG	GACAGAAGAGAGTGAGCACAG	TC156238	2.5	1	21	626	646	GACAGAAGAGAGUGAGCACAG	::::: ::::::::::::	GCAUGCUCUCUCUCUUCUGUC	Cleavage	similar to UniRef100_A7QPU0 Cluster: Chromosome chr10 scaffold_138, whole genome shotgun sequence; n=1; Vitis vinifera|Rep: Chromosome chr10 scaffold_138, whole genome shotgun sequence - Vitis vinifera (Grape), partial (69%)
	bpe-miR156a-5p.ts.AG	GACAGAAGAGAGTGAGCACAG	TC143610	2.5	1	21	617	637	GACAGAAGAGAGUGAGCACAG	::::: ::::::::::::	GCAUGCUCUCUCUCUUCUGUC	Cleavage	similar to UniRef100_P93015 Cluster: Squamosa promoter-binding-like protein 3; n=1; Arabidopsis thaliana|Rep: Squamosa promoter-binding-like protein 3 - Arabidopsis thaliana (Mouse-ear cress), partial (70%)
	bpe-miR156a-5p.ts.AG	GACAGAAGAGAGTGAGCACAG	TC140187	2.5	1	21	725	745	GACAGAAGAGAGUGAGCACAG	::::: ::::::::::::	CCAUGCUCUCUCUCUUCUGUC	Cleavage	similar to UniRef100_Q84JE4 Cluster: Squamosa promoter binding like-protein; n=1; Betula pendula|Rep: Squamosa promoter binding like-protein - Betula verrucosa (White birch) (Betula pendula), partial (80%)
	bpe-miR156a-5p.ts.AG	GACAGAAGAGAGTGAGCACAG	TC156260	2.5	1	21	644	664	GACAGAAGAGAGUGAGCACAG	::::: ::::::::::::	GCAUGCUCCCUCUCUUCUGUC	Cleavage	weakly similar to UniRef100_A7QPU0 Cluster: Chromosome chr10 scaffold_138, whole genome shotgun sequence; n=1; Vitis vinifera|Rep: Chromosome chr10 scaffold_138, whole genome shotgun sequence - Vitis vinifera (Grape), partial (78%)
	bpe-miR156a-5p.ts.AG	GACAGAAGAGAGTGAGCACAG	TC167753	2.5	1	21	636	656	GACAGAAGAGAGUGAGCACAG	::::: ::::::::::::	GCAUGCUCCCUCUCUUCUGUC	Cleavage	similar to UniRef100_Q5U8L4 Cluster: SBP transcription factor; n=1; Gossypium hirsutum|Rep: SBP transcription factor - Gossypium hirsutum (Upland cotton) (Gossypium mexicanum), partial (70%)
	bpe-miR156a-5p.ts.AG	GACAGAAGAGAGTGAGCACAG	TC138639	2.5	1	21	679	699	GACAGAAGAGAGUGAGCACAG	::::: ::::::::::::	GAUUGCUCUCUCUCUUCUGUC	Cleavage	similar to UniRef100_A7PJ70 Cluster: Chromosome chr12 scaffold_18, whole genome shotgun sequence; n=1; Vitis vinifera|Rep: Chromosome chr12 scaffold_18, whole genome shotgun sequence - Vitis vinifera (Grape), partial (70%)
	bpe-miR156a-5p.ts.AG	GACAGAAGAGAGTGAGCACAG	TC183201	2.5	1	21	903	923	GACAGAAGAGAGUGAGCACAG	::::: ::::::::::::	GAUUGCUCUCUCUCUUCUGUC	Cleavage	similar to UniRef100_Q52UU1 Cluster: Squamosa promoter binding-like protein; n=1; Betula platyphylla|Rep: Squamosa promoter binding-like protein - Betula platyphylla, partial (74%)
	bpe-miR156a-5p.ts.AG	GACAGAAGAGAGTGAGCACAG	TC181875	2.5	1	21	978	998	GACAGAAGAGAGUGAGCACAG	::::: ::::::::::::	GAUUGCUCUCUCUCUUCUGUC	Cleavage	homologue to UniRef100_Q96035 Cluster: Cytochrome oxidase subunit 3; n=1; Magnolia grandiflora|Rep: Cytochrome oxidase subunit 3 - Magnolia grandiflora (Southern magnolia), partial (69%)
	bpe-miR156a-5p.ts.AG	GACAGAAGAGAGTGAGCACAG	TC164700	2.5	1	21	124	144	GACAGAAGAGAGUGAGCACAG	:::.::: :::.:::::::	GAGUGUUCAGUCUUUUCUGUC	Cleavage	weakly similar to UniRef100_A7PVY1 Cluster: Chromosome chr8 scaffold_34, whole genome shotgun sequence; n=1; Vitis vinifera|Rep: Chromosome chr8 scaffold_34, whole genome shotgun sequence - Vitis vinifera (Grape), partial (7%)
	bpe-miR156a-5p.ts.AG	GACAGAAGAGAGTGAGCACAG	AJ407505	3	1	21	247	266	GACAGAAGAGAGUGAGCACAG	::::::::::::::::: :::	CUGUGCUCACUCUCUUC-GUC	Cleavage	UniRef100_A7PEL7 Cluster: Chromosome chr11 scaffold_13 whole genome shotgun sequence; n=1; Vitis vinifera|Rep:, partial (1%)
	bpe-miR156a-5p.ts.AG	GACAGAAGAGAGTGAGCACAG	BU894131	3	1	21	368	388	GACAGAAGAGAGUGAGCACAG	: :::.:.:::.::::.:::	CAGUGUUUACUUUCUUUUGUA	Cleavage	similar to UniRef100_A7R523 Cluster: Chromosome undetermined scaffold_838, whole genome shotgun sequence; n=1; Vitis vinifera|Rep: Chromosome undetermined scaffold_838, whole genome shotgun sequence - Vitis vinifera (Grape), partial (14%)
	bpe-miR156a-5p.ts.AG	GACAGAAGAGAGTGAGCACAG	TC180503	3	1	21	246	266	GACAGAAGAGAGUGAGCACAG	::.::..:.:::::::::	UCCUGUUCGUUUUCUUCUGUC	Cleavage	weakly similar to UniRef100_A4BRK1 Cluster: Probable transporter; n=1; Nitrococcus mobilis Nb-231|Rep: Probable transporter - Nitrococcus mobilis Nb-231, partial (5%)
	bpe-miR156a-5p.ts.AG	GACAGAAGAGAGTGAGCACAG	CX173964	3	1	21	25	45	GACAGAAGAGAGUGAGCACAG	:: .:...:::::::::::	AAGUCUUUGUUCUCUUCUGUC	Cleavage	similar to UniRef100_Q84TL2 Cluster: Phosphoglycerate kinase; n=1; Populus tremuloides|Rep: Phosphoglycerate kinase - Populus tremuloides (Quaking aspen), partial (41%)
	bpe-miR156a-5p.ts.AG	GACAGAAGAGAGTGAGCACAG	TC182061	3	1	21	598	618	GACAGAAGAGAGUGAGCACAG	:::. ::.:.:.:::::::	GAGUGUGCAUUUUUUUCUGUC	Cleavage	similar to UniRef100_P62458 Cluster: Histidinol dehydrogenase; n=1; Leptospira interrogans serovar Copenhageni|Rep: Histidinol dehydrogenase - Leptospira interrogans serogroup Icterohaemorrhagiae serovarcopenhageni, partial (5%)
	bpe-miR156a-5p.ts.AG	GACAGAAGAGAGTGAGCACAG	TC168182	3	1	21	963	983	GACAGAAGAGAGUGAGCACAG	:: .::: :::::::::::	AAGUUUUCAAUCUCUUCUGUC	Cleavage	similar to UniRef100_A7QYP0 Cluster: Chromosome undetermined scaffold_252, whole genome shotgun sequence; n=1; Vitis vinifera|Rep: Chromosome undetermined scaffold_252, whole genome shotgun sequence - Vitis vinifera (Grape), partial (6%)
	bpe-miR156a-5p.ts.G1C.A2G.C3T.A4G.G5C.A6T.A7C.G8A.A9C.G10T.A11C.G12T.T13C.G14T.A15T.G16C.C17T.A18G.C19T.C	CGTGCTCACTCTCTTCTGTC	CK092224	0.5	1	20	359	378	CGUGCUCACUCUCUUCUGUC	:::::::::::::::::.::	GACAGAAGAGAGUGAGCGCG	Cleavage	homologue to UniRef100_A6FZZ0 Cluster: Trk active potasium channel; n=1; Plesiocystis pacifica SIR-1|Rep: Trk active potasium, partial (2%)
	bpe-miR156a-5p.ts.G1C.A2G.C3T.A4G.G5C.A6T.A7C.G8A.A9C.G10T.A11C.G12T.T13C.G14T.A15T.G16C.C17T.A18G.C19T.C	CGTGCTCACTCTCTTCTGTC	TC152430	3	1	20	401	420	CGUGCUCACUCUCUUCUGUC	:: :::::::::::: ::.:	GAAAGAAGAGAGUGAUCAUG	Cleavage	similar to UniRef100_A7PHK6 Cluster: Chromosome chr17 scaffold_16, whole genome shotgun sequence; n=1; Vitis vinifera|Rep: Chromosome chr17 scaffold_16, whole genome shotgun sequence - Vitis vinifera (Grape), partial (17%)
	bpe-miR156a-5p.ts.G1C.A2G.C3T.A4G.G5C.A6T.A7C.G8A.A9C.G10T.A11C.G12T.T13C.G14T.A15T.G16C.C17T.A18G.C19T.C	CGTGCTCACTCTCTTCTGTC	BU827300	3	1	20	12	32	CGUGCUCACUCUCU-UCUGUC	::::: :::::::::::::	CACAGAGAGAGAGUGAGCACC	Cleavage	similar to UniRef100_A7P358 Cluster: Chromosome chr1 scaffold_5, whole genome shotgun sequence; n=1; Vitis vinifera|Rep: Chromosome chr1 scaffold_5, whole genome shotgun sequence - Vitis vinifera (Grape), partial (34%)
	bpe-miR156a-5p.ts.G1C.A2G.C3T.A4G.G5C.A6T.A7C.G8A.A9C.G10T.A11C.G12T.T13C.G14T.A15T.G16C.C17T.A18G.C19T.C	CGTGCTCACTCTCTTCTGTC	TC149448	3	1	20	119	138	CGUGCUCACUCUCUUCUGUC	:.::: :::::::::.::	CAUAGAUGAGAGUGAGUACA	Cleavage	weakly similar to UniRef100_A7P394 Cluster: Chromosome chr1 scaffold_5, whole genome shotgun sequence; n=1; Vitis vinifera|Rep: Chromosome chr1 scaffold_5, whole genome shotgun sequence - Vitis vinifera (Grape), partial (52%)
	bpe-miR156a-5p.ts.G1C.A2G.C3T.A4G.G5C.A6T.A7C.G8A.A9C.G10T.A11C.G12T.T13C.G14T.A15T.G16C.C17T.A18G.C19T.C	CGTGCTCACTCTCTTCTGTC	TC177643	3	1	20	689	708	CGUGCUCACUCUCUUCUGUC	: :::.:::::::::::.	AAAAGAGGAGAGUGAGCAUU	Cleavage	similar to UniRef100_A7QT48 Cluster: Chromosome undetermined scaffold_165, whole genome shotgun sequence; n=1; Vitis vinifera|Rep: Chromosome undetermined scaffold_165, whole genome shotgun sequence - Vitis vinifera (Grape), partial (40%)
	bpe-miR156a-5p.ts.G1C.A2G.C3T.A4G.G5C.A6T.A7C.G8A.A9C.G10T.A11C.G12T.T13C.G14T.A15T.G16C.C17T.A18G.C19T.C	CGTGCTCACTCTCTTCTGTC	TC156145	3	1	20	63	82	CGUGCUCACUCUCUUCUGUC	: ::::::::: :::::.:	UAAAGAAGAGAGAGAGCAUG	Cleavage	homologue to UniRef100_Q84T16 Cluster: Serine/threonine protein phosphatase; n=1; Phaseolus acutifolius|Rep: Serine/threonine protein phosphatase - Phaseolus acutifolius (Tepary bean), partial (53%)
	bpe-miR156a-5p.Ts.T	TTGACAGAAGAGAGTGAGCACT	TC159682	1	1	22	41	62	UUGACAGAAGAGAGUGAGCACU	:::::: ::::::::::::::	CGUGCUCUCUCUCUUCUGUCAA	Cleavage	similar to UniRef100_A7PFE5 Cluster: Chromosome chr11 scaffold_14, whole genome shotgun sequence; n=1; Vitis vinifera|Rep: Chromosome chr11 scaffold_14, whole genome shotgun sequence - Vitis vinifera (Grape), partial (6%)
	bpe-miR156a-5p.Ts.T	TTGACAGAAGAGAGTGAGCACT	CN523533	1	1	22	537	558	UUGACAGAAGAGAGUGAGCACU	:::::: ::::::::::::::	CGUGCUCUCUCUCUUCUGUCAA	Cleavage	homologue to UniRef100_A2YGR5 Cluster: Squamosa promoter-binding-like protein 12; n=1; Oryza sativa Indica Group|Rep: Squamosa promoter-binding-like protein 12 - Oryza sativa subsp. indica (Rice), partial (13%)
	bpe-miR156a-5p.Ts.T	TTGACAGAAGAGAGTGAGCACT	TC162283	1	1	22	191	212	UUGACAGAAGAGAGUGAGCACU	:::::: ::::::::::::::	CGUGCUCUCUCUCUUCUGUCAA	Cleavage	similar to UniRef100_A7PFE5 Cluster: Chromosome chr11 scaffold_14, whole genome shotgun sequence; n=1; Vitis vinifera|Rep: Chromosome chr11 scaffold_14, whole genome shotgun sequence - Vitis vinifera (Grape), partial (6%)
	bpe-miR156a-5p.Ts.T	TTGACAGAAGAGAGTGAGCACT	TC188289	1	1	22	480	501	UUGACAGAAGAGAGUGAGCACU	:::::: ::::::::::::::	CGUGCUCUCUCUCUUCUGUCAA	Cleavage	similar to UniRef100_A7PFE5 Cluster: Chromosome chr11 scaffold_14, whole genome shotgun sequence; n=1; Vitis vinifera|Rep: Chromosome chr11 scaffold_14, whole genome shotgun sequence - Vitis vinifera (Grape), partial (13%)
	bpe-miR156a-5p.Ts.T	TTGACAGAAGAGAGTGAGCACT	TC150948	1	1	22	341	362	UUGACAGAAGAGAGUGAGCACU	:::::: ::::::::::::::	CGUGCUCUCUCUCUUCUGUCAA	Cleavage	similar to UniRef100_A7PFE5 Cluster: Chromosome chr11 scaffold_14, whole genome shotgun sequence; n=1; Vitis vinifera|Rep: Chromosome chr11 scaffold_14, whole genome shotgun sequence - Vitis vinifera (Grape), partial (10%)
	bpe-miR156a-5p.Ts.T	TTGACAGAAGAGAGTGAGCACT	TC158039	1	1	22	695	716	UUGACAGAAGAGAGUGAGCACU	:::::: ::::::::::::::	CGUGCUCUCUCUCUUCUGUCAA	Cleavage	similar to UniRef100_A7PFE5 Cluster: Chromosome chr11 scaffold_14, whole genome shotgun sequence; n=1; Vitis vinifera|Rep: Chromosome chr11 scaffold_14, whole genome shotgun sequence - Vitis vinifera (Grape), partial (49%)
	bpe-miR156a-5p.Ts.T	TTGACAGAAGAGAGTGAGCACT	TC183825	1	1	22	400	421	UUGACAGAAGAGAGUGAGCACU	:::::: ::::::::::::::	CGUGCUCUCUCUCUUCUGUCAA	Cleavage	similar to UniRef100_A7PFE5 Cluster: Chromosome chr11 scaffold_14, whole genome shotgun sequence; n=1; Vitis vinifera|Rep: Chromosome chr11 scaffold_14, whole genome shotgun sequence - Vitis vinifera (Grape), partial (11%)
	bpe-miR156a-5p.Ts.T	TTGACAGAAGAGAGTGAGCACT	TC156238	1	1	22	627	648	UUGACAGAAGAGAGUGAGCACU	::::: ::::::::::::::	CAUGCUCUCUCUCUUCUGUCAA	Cleavage	similar to UniRef100_A7QPU0 Cluster: Chromosome chr10 scaffold_138, whole genome shotgun sequence; n=1; Vitis vinifera|Rep: Chromosome chr10 scaffold_138, whole genome shotgun sequence - Vitis vinifera (Grape), partial (69%)
	bpe-miR156a-5p.Ts.T	TTGACAGAAGAGAGTGAGCACT	TC143610	1	1	22	618	639	UUGACAGAAGAGAGUGAGCACU	::::: ::::::::::::::	CAUGCUCUCUCUCUUCUGUCAA	Cleavage	similar to UniRef100_P93015 Cluster: Squamosa promoter-binding-like protein 3; n=1; Arabidopsis thaliana|Rep: Squamosa promoter-binding-like protein 3 - Arabidopsis thaliana (Mouse-ear cress), partial (70%)
	bpe-miR156a-5p.Ts.T	TTGACAGAAGAGAGTGAGCACT	TC140187	1	1	22	726	747	UUGACAGAAGAGAGUGAGCACU	::::: ::::::::::::::	CAUGCUCUCUCUCUUCUGUCAA	Cleavage	similar to UniRef100_Q84JE4 Cluster: Squamosa promoter binding like-protein; n=1; Betula pendula|Rep: Squamosa promoter binding like-protein - Betula verrucosa (White birch) (Betula pendula), partial (80%)
	bpe-miR156a-5p.Ts.T	TTGACAGAAGAGAGTGAGCACT	TC156260	1	1	22	645	666	UUGACAGAAGAGAGUGAGCACU	::::: ::::::::::::::	CAUGCUCCCUCUCUUCUGUCAA	Cleavage	weakly similar to UniRef100_A7QPU0 Cluster: Chromosome chr10 scaffold_138, whole genome shotgun sequence; n=1; Vitis vinifera|Rep: Chromosome chr10 scaffold_138, whole genome shotgun sequence - Vitis vinifera (Grape), partial (78%)
	bpe-miR156a-5p.Ts.T	TTGACAGAAGAGAGTGAGCACT	TC167753	1	1	22	637	658	UUGACAGAAGAGAGUGAGCACU	::::: ::::::::::::::	CAUGCUCCCUCUCUUCUGUCAA	Cleavage	similar to UniRef100_Q5U8L4 Cluster: SBP transcription factor; n=1; Gossypium hirsutum|Rep: SBP transcription factor - Gossypium hirsutum (Upland cotton) (Gossypium mexicanum), partial (70%)
	bpe-miR156a-5p.Ts.T	TTGACAGAAGAGAGTGAGCACT	TC139619	1.5	1	22	120	141	UUGACAGAAGAGAGUGAGCACU	:::::: :::::::::::::.	UGUGCUCUCUCUCUUCUGUCAG	Cleavage	similar to UniRef100_Q94JW8 Cluster: Squamosa promoter-binding-like protein 6; n=1; Arabidopsis thaliana|Rep: Squamosa promoter-binding-like protein 6 - Arabidopsis thaliana (Mouse-ear cress), partial (9%)
	bpe-miR156a-5p.Ts.T	TTGACAGAAGAGAGTGAGCACT	TC161130	1.5	1	22	422	443	UUGACAGAAGAGAGUGAGCACU	:::::: :::::::::::::.	UGUGCUCUCUCUCUUCUGUCAG	Cleavage	similar to UniRef100_Q94JW8 Cluster: Squamosa promoter-binding-like protein 6; n=1; Arabidopsis thaliana|Rep: Squamosa promoter-binding-like protein 6 - Arabidopsis thaliana (Mouse-ear cress), partial (12%)
	bpe-miR156a-5p.Ts.T	TTGACAGAAGAGAGTGAGCACT	TC146251	1.5	1	22	793	814	UUGACAGAAGAGAGUGAGCACU	:::..::.:::::::::::	UUAGCUUGCUUUCUUCUGUCAA	Cleavage	similar to UniRef100_A7QQJ3 Cluster: Chromosome undetermined scaffold_143, whole genome shotgun sequence; n=1; Vitis vinifera|Rep: Chromosome undetermined scaffold_143, whole genome shotgun sequence - Vitis vinifera (Grape), partial (51%)
	bpe-miR156a-5p.Ts.T	TTGACAGAAGAGAGTGAGCACT	TC170313	2	1	22	44	65	UUGACAGAAGAGAGUGAGCACU	:::::: :::::::::::::	UGUGCUCUCUCUCUUCUGUCAU	Cleavage
	bpe-miR156a-5p.Ts.T	TTGACAGAAGAGAGTGAGCACT	TC140194	2	1	22	390	411	UUGACAGAAGAGAGUGAGCACU	:::::: :::::::::::::	UGUGCUCUCUCUCUUCUGUCAU	Cleavage	similar to UniRef100_A7PKG5 Cluster: Chromosome chr15 scaffold_19, whole genome shotgun sequence; n=1; Vitis vinifera|Rep: Chromosome chr15 scaffold_19, whole genome shotgun sequence - Vitis vinifera (Grape), partial (67%)
	bpe-miR156a-5p.Ts.T	TTGACAGAAGAGAGTGAGCACT	TC179932	2	1	22	831	852	UUGACAGAAGAGAGUGAGCACU	:::::: :::::::::::::	CGUGCUCUCUCUCUUCUGUCAU	Cleavage	similar to UniRef100_A7QP31 Cluster: Chromosome chr1 scaffold_136, whole genome shotgun sequence; n=1; Vitis vinifera|Rep: Chromosome chr1 scaffold_136, whole genome shotgun sequence - Vitis vinifera (Grape), partial (53%)
	bpe-miR156a-5p.Ts.T	TTGACAGAAGAGAGTGAGCACT	TC155685	2	1	22	1161	1182	UUGACAGAAGAGAGUGAGCACU	:::::: :::::::::::::	UGUGCUCUCUCUCUUCUGUCAU	Cleavage	similar to UniRef100_Q6YZE8 Cluster: Squamosa promoter-binding-like protein 16; n=1; Oryza sativa Japonica Group|Rep: Squamosa promoter-binding-like protein 16 - Oryza sativa subsp. japonica (Rice), partial (24%)
	bpe-miR156a-5p.Ts.T	TTGACAGAAGAGAGTGAGCACT	TC140316	2	1	22	1077	1098	UUGACAGAAGAGAGUGAGCACU	:::::: :::::::::::::	UGUGCUCUCUCUCUUCUGUCAU	Cleavage	similar to UniRef100_A7PKG5 Cluster: Chromosome chr15 scaffold_19, whole genome shotgun sequence; n=1; Vitis vinifera|Rep: Chromosome chr15 scaffold_19, whole genome shotgun sequence - Vitis vinifera (Grape), partial (72%)
	bpe-miR156a-5p.Ts.T	TTGACAGAAGAGAGTGAGCACT	TC138639	2	1	22	680	701	UUGACAGAAGAGAGUGAGCACU	: ::::: :::::::::::::	AUUGCUCUCUCUCUUCUGUCAU	Cleavage	similar to UniRef100_A7PJ70 Cluster: Chromosome chr12 scaffold_18, whole genome shotgun sequence; n=1; Vitis vinifera|Rep: Chromosome chr12 scaffold_18, whole genome shotgun sequence - Vitis vinifera (Grape), partial (70%)
	bpe-miR156a-5p.Ts.T	TTGACAGAAGAGAGTGAGCACT	TC183201	2	1	22	904	925	UUGACAGAAGAGAGUGAGCACU	: ::::: :::::::::::::	AUUGCUCUCUCUCUUCUGUCAU	Cleavage	similar to UniRef100_Q52UU1 Cluster: Squamosa promoter binding-like protein; n=1; Betula platyphylla|Rep: Squamosa promoter binding-like protein - Betula platyphylla, partial (74%)
	bpe-miR156a-5p.Ts.T	TTGACAGAAGAGAGTGAGCACT	TC181875	2	1	22	979	1000	UUGACAGAAGAGAGUGAGCACU	: ::::: :::::::::::::	AUUGCUCUCUCUCUUCUGUCAU	Cleavage	homologue to UniRef100_Q96035 Cluster: Cytochrome oxidase subunit 3; n=1; Magnolia grandiflora|Rep: Cytochrome oxidase subunit 3 - Magnolia grandiflora (Southern magnolia), partial (69%)
	bpe-miR156a-5p.Ts.T	TTGACAGAAGAGAGTGAGCACT	TC159843	2	1	22	31	52	UUGACAGAAGAGAGUGAGCACU	::::. :::::::.::::::	GAUGCUUCCUCUCUUUUGUCAA	Cleavage	similar to UniRef100_P93484 Cluster: Vacuolar-sorting receptor 1 precursor; n=1; Pisum sativum|Rep: Vacuolar-sorting receptor 1 precursor - Pisum sativum (Garden pea), partial (31%)
	bpe-miR156a-5p.Ts.T	TTGACAGAAGAGAGTGAGCACT	TC167513	2.5	1	22	258	279	UUGACAGAAGAGAGUGAGCACU	:::::::::::::.: :.::	UCUGCUCACUCUCUUUUUUUAA	Cleavage	similar to UniRef100_Q9XGI4 Cluster: Cyclin A2; n=1; Solanum lycopersicum|Rep: Cyclin A2 - Solanum lycopersicum (Tomato) (Lycopersicon esculentum), partial (20%)
	bpe-miR156a-5p.Ts.T	TTGACAGAAGAGAGTGAGCACT	AJ407505	3	1	22	248	268	UUGACAGAAGAGAGUGAGCACU	::::::::::::::: :::::	UGUGCUCACUCUCUUC-GUCAA	Cleavage	UniRef100_A7PEL7 Cluster: Chromosome chr11 scaffold_13 whole genome shotgun sequence; n=1; Vitis vinifera|Rep:, partial (1%)
	bpe-miR156a-5p.Ts.T	TTGACAGAAGAGAGTGAGCACT	TC147463	3	1	22	153	174	UUGACAGAAGAGAGUGAGCACU	::::..::::::::: :.::	UCUGCUUGCUCUCUUCUAUUAA	Cleavage	similar to UniRef100_A3IAY7 Cluster: Nitrogen fixation protein; n=1; Bacillus sp. B14905|Rep: Nitrogen fixation protein - Bacillus sp. B14905, partial (19%)
	bpe-miR156a-5p.Ts.T	TTGACAGAAGAGAGTGAGCACT	TC138813	3	1	22	39	60	UUGACAGAAGAGAGUGAGCACU	:::::::::.:::::::	AAAGCUCACUCUUUUCUGUCCG	Cleavage	UniRef100_Q7EUR6 Cluster: AT4g05320/C17L7_240; n=8; core eudicotyledons|Rep: AT4g05320/C17L7_240 - Arabidopsis thaliana (Mouse-ear cress), partial (80%)
	bpe-miR156a-5p.Ts.T	TTGACAGAAGAGAGTGAGCACT	TC179956	3	1	22	1292	1313	UUGACAGAAGAGAGUGAGCACU	::::::::. :::.:::.::	UCUGCUCACUUGCUUUUGUUAA	Translation	similar to UniRef100_A7NUJ3 Cluster: Chromosome chr18 scaffold_1, whole genome shotgun sequence; n=1; Vitis vinifera|Rep: Chromosome chr18 scaffold_1, whole genome shotgun sequence - Vitis vinifera (Grape), partial (49%)
	bpe-miR156a-5p.Ts.T	TTGACAGAAGAGAGTGAGCACT	TC149795	3	1	22	336	357	UUGACAGAAGAGAGUGAGCACU	:::.:: :::.:::::::::	UGUGUUCUAUCUUUUCUGUCAA	Cleavage	similar to UniRef100_A7NTH0 Cluster: Chromosome chr18 scaffold_1, whole genome shotgun sequence; n=1; Vitis vinifera|Rep: Chromosome chr18 scaffold_1, whole genome shotgun sequence - Vitis vinifera (Grape), partial (46%)
	bpe-miR156a-5p.Ts.T	TTGACAGAAGAGAGTGAGCACT	DB876395	3	1	22	31	52	UUGACAGAAGAGAGUGAGCACU	::.:: ::::::::: ::::	UCUGUUCUCUCUCUUCUCUCAA	Cleavage	similar to UniRef100_Q5BJ88 Cluster: Wasf1 protein; n=1; Xenopus tropicalis|Rep: Wasf1 protein - Xenopus tropicalis (Western clawed frog) (Silurana tropicalis), partial (5%)
	bpe-miR156a-5p.Ts.T	TTGACAGAAGAGAGTGAGCACT	TC179911	3	1	22	451	472	UUGACAGAAGAGAGUGAGCACU	::::::.::::::::.:	UAGACUCACUUUCUUCUGUUAU	Cleavage	similar to UniRef100_Q6W2J5 Cluster: VDAC1.1; n=1; Lotus japonicus|Rep: VDAC1.1 - Lotus japonicus, partial (37%)
	bpe-miR156a-5p.Ts.T	TTGACAGAAGAGAGTGAGCACT	TC145461	3	1	22	1021	1042	UUGACAGAAGAGAGUGAGCACU	::::::.::::::::.:	UNNNCUCACUUUCUUCUGUUAU	Cleavage	similar to UniRef100_Q6W2J5 Cluster: VDAC1.1; n=1; Lotus japonicus|Rep: VDAC1.1 - Lotus japonicus, complete
	bpe-miR156a-5p.Ts.T	TTGACAGAAGAGAGTGAGCACT	TC140389	3	1	22	1024	1045	UUGACAGAAGAGAGUGAGCACU	::::::.::::::::.:	UAGACUCACUUUCUUCUGUUAU	Cleavage	similar to UniRef100_Q6W2J5 Cluster: VDAC1.1; n=1; Lotus japonicus|Rep: VDAC1.1 - Lotus japonicus, partial (98%)
	bpe-miR156a-5p.Ts.T	TTGACAGAAGAGAGTGAGCACT	TC156083	3	1	22	18	39	UUGACAGAAGAGAGUGAGCACU	:::::::.:::::: :::	AAAGCUCACUUUCUUCUUUCAU	Cleavage	weakly similar to UniRef100_Q84Q77 Cluster: 17.4 kDa class I heat shock protein 3; n=3; Oryza sativa|Rep: 17.4 kDa class I heat shock protein 3 - Oryza sativa subsp. japonica (Rice), partial (42%)
	bpe-miR156a-5p.Ts.T	TTGACAGAAGAGAGTGAGCACT	TC157471	3	1	22	141	162	UUGACAGAAGAGAGUGAGCACU	:::::::.:::::: :::	AAAGCUCACUUUCUUCUUUCAU	Cleavage
	bpe-miR156a-5p.Ts.T	TTGACAGAAGAGAGTGAGCACT	TC171439	3	1	22	144	165	UUGACAGAAGAGAGUGAGCACU	::: :::::::.:::.::	CUCUCUCUCUCUCUUUUGUUAA	Cleavage	similar to UniRef100_Q6R567 Cluster: Ring domain containing protein; n=1; Capsicum annuum|Rep: Ring domain containing protein - Capsicum annuum (Bell pepper), partial (10%)
	bpe-miR156a-5p.Ts.T	TTGACAGAAGAGAGTGAGCACT	TC168311	3	1	22	115	136	UUGACAGAAGAGAGUGAGCACU	::: :::::::.:::.::	CUCUCUCUCUCUCUUUUGUUAA	Cleavage
	bpe-miR156a-5p.Ts.T	TTGACAGAAGAGAGTGAGCACT	TC172909	3	1	22	121	142	UUGACAGAAGAGAGUGAGCACU	::. :::::::.::::::	CCAUCUUUCUCUCUUUUGUCAA	Cleavage	homologue to UniRef100_A7PTB5 Cluster: Chromosome chr8 scaffold_29, whole genome shotgun sequence; n=1; Vitis vinifera|Rep: Chromosome chr8 scaffold_29, whole genome shotgun sequence - Vitis vinifera (Grape), partial (24%)
	bpe-miR156a-5p.Ts.T	TTGACAGAAGAGAGTGAGCACT	TC178385	3	1	22	116	137	UUGACAGAAGAGAGUGAGCACU	::. :::::::.::::::	CCAUCUUUCUCUCUUUUGUCAA	Cleavage	homologue to UniRef100_A7PTB5 Cluster: Chromosome chr8 scaffold_29, whole genome shotgun sequence; n=1; Vitis vinifera|Rep: Chromosome chr8 scaffold_29, whole genome shotgun sequence - Vitis vinifera (Grape), partial (28%)
	bpe-miR156a-5p.Ts.T	TTGACAGAAGAGAGTGAGCACT	TC139504	3	1	22	106	127	UUGACAGAAGAGAGUGAGCACU	::: :::::::.:::.::	CUCUCUCUCUCUCUUUUGUUAA	Cleavage	similar to UniRef100_Q6R567 Cluster: Ring domain containing protein; n=1; Capsicum annuum|Rep: Ring domain containing protein - Capsicum annuum (Bell pepper), partial (60%)
	bpe-miR156a-5p.Ts.T	TTGACAGAAGAGAGTGAGCACT	CX174005	3	1	22	217	238	UUGACAGAAGAGAGUGAGCACU	:: ::::.:: ::::::::	AAGGCCCACUUUCAUCUGUCAA	Cleavage	weakly similar to UniRef100_A7QEV5 Cluster: Chromosome chr16 scaffold_86, whole genome shotgun sequence; n=1; Vitis vinifera|Rep: Chromosome chr16 scaffold_86, whole genome shotgun sequence - Vitis vinifera (Grape), partial (32%)
	bpe-miR156a-5p.Ts.T	TTGACAGAAGAGAGTGAGCACT	TC158308	3	1	22	244	265	UUGACAGAAGAGAGUGAGCACU	:: ::::.:: ::::::::	AUGGCCCACUUUCAUCUGUCAA	Cleavage	similar to UniRef100_A7QEV5 Cluster: Chromosome chr16 scaffold_86, whole genome shotgun sequence; n=1; Vitis vinifera|Rep: Chromosome chr16 scaffold_86, whole genome shotgun sequence - Vitis vinifera (Grape), partial (36%)
	bpe-miR156a-5p.Ts.T	TTGACAGAAGAGAGTGAGCACT	TC154159	3	1	22	288	309	UUGACAGAAGAGAGUGAGCACU	:: ::::.:: ::::::::	AUGGCCCACUUUCAUCUGUCAA	Cleavage	similar to UniRef100_A7QEV5 Cluster: Chromosome chr16 scaffold_86, whole genome shotgun sequence; n=1; Vitis vinifera|Rep: Chromosome chr16 scaffold_86, whole genome shotgun sequence - Vitis vinifera (Grape), partial (56%)
	bpe-miR156a-5p.Ts.T	TTGACAGAAGAGAGTGAGCACT	TC158063	3	1	22	327	348	UUGACAGAAGAGAGUGAGCACU	:: ::::.:: ::::::::	AUGGCCCACUUUCAUCUGUCAA	Cleavage	similar to UniRef100_A7QEV5 Cluster: Chromosome chr16 scaffold_86, whole genome shotgun sequence; n=1; Vitis vinifera|Rep: Chromosome chr16 scaffold_86, whole genome shotgun sequence - Vitis vinifera (Grape), partial (66%)
	bpe-miR156a-5p.Ts.T	TTGACAGAAGAGAGTGAGCACT	TC139043	3	1	22	253	274	UUGACAGAAGAGAGUGAGCACU	:: ::::.:: ::::::::	AUGGCCCACUUUCAUCUGUCAA	Cleavage	similar to UniRef100_A7QEV5 Cluster: Chromosome chr16 scaffold_86, whole genome shotgun sequence; n=1; Vitis vinifera|Rep: Chromosome chr16 scaffold_86, whole genome shotgun sequence - Vitis vinifera (Grape), complete
	bpe-miR156a-5p.Ts.T	TTGACAGAAGAGAGTGAGCACT	TC151559	3	1	22	250	271	UUGACAGAAGAGAGUGAGCACU	:: ::::.:: ::::::::	AUGGCCCACUUUCAUCUGUCAA	Cleavage	similar to UniRef100_A7QEV5 Cluster: Chromosome chr16 scaffold_86, whole genome shotgun sequence; n=1; Vitis vinifera|Rep: Chromosome chr16 scaffold_86, whole genome shotgun sequence - Vitis vinifera (Grape), partial (98%)
bpe-miR156aa	bpe-miR156aa.GCs.G2C.A3T.A5T.G6A.A8C.G9T.A10C.T11C.A12T.A14T.G15C.ac	GCTCTCTAGCTCCTGTCAGC	TC163773	2.5	1	20	144	163	GCUCUCUAGCUCCUGUCAGC	:: :::::::.::::::::	GCAAACAGGAGUUAGAGAGC	Cleavage
	bpe-miR156aa.GCs.G2C.A3T.A5T.G6A.A8C.G9T.A10C.T11C.A12T.A14T.G15C.ac	GCTCTCTAGCTCCTGTCAGC	TC157004	2.5	1	20	206	225	GCUCUCUAGCUCCUGUCAGC	:: :::::::.::::::::	GCAAACAGGAGUUAGAGAGC	Cleavage	similar to UniRef100_Q6NNI8 Cluster: Zinc finger A20 and AN1 domain-containing stress-associated protein 1; n=1; Arabidopsis thaliana|Rep: Zinc finger A20 and AN1 domain-containing stress-associated protein 1 - Arabidopsis thaliana (Mouse-ear cress), partial (74%)
	bpe-miR156aa.GCs.G2C.A3T.A5T.G6A.A8C.G9T.A10C.T11C.A12T.A14T.G15C.ac	GCTCTCTAGCTCCTGTCAGC	TC141334	2.5	1	20	174	193	GCUCUCUAGCUCCUGUCAGC	:: :::::::.::::::::	GCAAACAGGAGUUAGAGAGC	Cleavage	similar to UniRef100_A1YMZ7 Cluster: Zinc finger A20 and AN1 domains-containing protein; n=1; Brassica rapa|Rep: Zinc finger A20 and AN1 domains-containing protein - Brassica campestris (Field mustard), partial (72%)
	bpe-miR156aa.GCs.G2C.A3T.A5T.G6A.A8C.G9T.A10C.T11C.A12T.A14T.G15C.ac	GCTCTCTAGCTCCTGTCAGC	TC149103	3	1	20	520	539	GCUCUCUAGCUCCUGUCAGC	::: :::::.:.:.:::::.	GCUCACAGGGGUUGGAGAGU	Cleavage	similar to UniRef100_A7PKJ1 Cluster: Chromosome chr15 scaffold_19, whole genome shotgun sequence; n=1; Vitis vinifera|Rep: Chromosome chr15 scaffold_19, whole genome shotgun sequence - Vitis vinifera (Grape), partial (79%)
	bpe-miR156aa.GCs.G2C.A3T.A5T.G6A.A8C.G9T.A10C.T11C.A12T.A14T.G15C.ac	GCTCTCTAGCTCCTGTCAGC	TC184249	3	1	20	454	473	GCUCUCUAGCUCCUGUCAGC	: ::::::::::.:::: :	UCGGACAGGAGCUGGAGAAC	Cleavage
	bpe-miR156aa.Gs.T1C.G2T.A3C.C4T.A5C.G6T.G7A.A8G.G9C.A10T.T11C.A12C.G13T.A14G.G15T.A16C.G17A.ac	GCTCTCTAGCTCCTGTCAC	TC169741	3	1	19	521	539	GCUCUCUAGCUCCUGUCAC	::::.:::.:: ::::.::	GUGAUAGGGGCCAGAGGGC	Cleavage	similar to UniRef100_A7P8Q4 Cluster: Chromosome chr3 scaffold_8, whole genome shotgun sequence; n=1; Vitis vinifera|Rep: Chromosome chr3 scaffold_8, whole genome shotgun sequence - Vitis vinifera (Grape), partial (21%)
	bpe-miR156aa.Gs.T1C.G2T.A3C.C4T.A5C.G6T.G7A.A8G.G9C.A10T.T11C.A12C.G13T.A14G.G15T.A16C.G17A.ac	GCTCTCTAGCTCCTGTCAC	TC150798	3	1	19	38	56	GCUCUCUAGCUCCUGUCAC	:::::::: :::.:::.:.	GUGACAGGUGCUGGAGGGU	Translation	weakly similar to UniRef100_A7PJZ9 Cluster: Chromosome chr12 scaffold_18, whole genome shotgun sequence; n=1; Vitis vinifera|Rep: Chromosome chr12 scaffold_18, whole genome shotgun sequence - Vitis vinifera (Grape), partial (90%)
	bpe-miR156aa.Gs.T1C.G2T.A3C.C4T.A5C.G6T.G7A.A8G.G9C.A10T.T11C.A12C.G13T.A14G.G15T.A16C.G17A.ac	GCTCTCTAGCTCCTGTCAC	TC169749	3	1	19	144	162	GCUCUCUAGCUCCUGUCAC	: ::::::::: .::::::	GGGACAGGAGCCGGAGAGC	Cleavage	similar to UniRef100_A7NSV2 Cluster: Chromosome chr18 scaffold_1, whole genome shotgun sequence; n=1; Vitis vinifera|Rep: Chromosome chr18 scaffold_1, whole genome shotgun sequence - Vitis vinifera (Grape), partial (17%)
	bpe-miR156aa.Gs.T1C.G2T.A3C.C4T.A5C.G6T.G7A.A8G.G9C.A10T.T11C.A12C.G13T.A14G.G15T.A16C.G17A.ac	GCTCTCTAGCTCCTGTCAC	TC160726	3	1	19	247	265	GCUCUCUAGCUCCUGUCAC	: ::::::::: .::::::	GGGACAGGAGCCGGAGAGC	Cleavage	similar to UniRef100_A7NSV2 Cluster: Chromosome chr18 scaffold_1, whole genome shotgun sequence; n=1; Vitis vinifera|Rep: Chromosome chr18 scaffold_1, whole genome shotgun sequence - Vitis vinifera (Grape), partial (17%)
	bpe-miR156aa.Gs.T1C.G2T.A3C.C4T.A5C.G6T.G7A.A8G.G9C.A10T.T11C.A12C.G13T.A14G.G15T.A16C.G17A.ac	GCTCTCTAGCTCCTGTCAC	TC163843	3	1	19	247	265	GCUCUCUAGCUCCUGUCAC	: ::::::::: .::::::	GGGACAGGAGCCGGAGAGC	Cleavage
	bpe-miR156aa.Gs.T1C.G2T.A3C.C4T.A5C.G6T.G7A.A8G.G9C.A10T.T11C.A12C.G13T.A14G.G15T.A16C.G17A.C18G.ac	GCTCTCTAGCTCCTGTCAG	TC184249	3	1	19	455	473	GCUCUCUAGCUCCUGUCAG	: ::::::::::.:::: :	CGGACAGGAGCUGGAGAAC	Cleavage
	bpe-miR156aa.Gs.T1C.G2T.A3C.C4T.A5C.G6T.G7A.A8G.G9C.A10T.T11C.A12C.G13T.A14G.G15T.A16C.G17A.C18G.ac	GCTCTCTAGCTCCTGTCAG	TC149103	3	1	19	521	539	GCUCUCUAGCUCCUGUCAG	:: :::::.:.:.:::::.	CUCACAGGGGUUGGAGAGU	Cleavage	similar to UniRef100_A7PKJ1 Cluster: Chromosome chr15 scaffold_19, whole genome shotgun sequence; n=1; Vitis vinifera|Rep: Chromosome chr15 scaffold_19, whole genome shotgun sequence - Vitis vinifera (Grape), partial (79%)
	bpe-miR156aa.TGs.G2A.G7A	TGTAACAGAAGATAGAGAGCAC	TC153290	1	1	22	692	713	UGUAACAGAAGAUAGAGAGCAC	::::.:::.::::::::::::	AUGCUUUCUGUCUUCUGUUACA	Cleavage	similar to UniRef100_A7Q1C9 Cluster: Chromosome chr10 scaffold_43, whole genome shotgun sequence; n=1; Vitis vinifera|Rep: Chromosome chr10 scaffold_43, whole genome shotgun sequence - Vitis vinifera (Grape), partial (29%)
	bpe-miR156aa.TGs.G2A.G7A	TGTAACAGAAGATAGAGAGCAC	TC169095	2	1	22	440	461	UGUAACAGAAGAUAGAGAGCAC	::::::::.: ::::::::::	AUGCUCUCUGUAUUCUGUUACA	Translation	similar to UniRef100_A7P2L9 Cluster: Chromosome chr1 scaffold_5, whole genome shotgun sequence; n=1; Vitis vinifera|Rep: Chromosome chr1 scaffold_5, whole genome shotgun sequence - Vitis vinifera (Grape), partial (38%)
	bpe-miR156aa.TGs.G2A.G7A	TGTAACAGAAGATAGAGAGCAC	DT492780	2	1	22	482	503	UGUAACAGAAGAUAGAGAGCAC	::::::::.: ::::::::::	AUGCUCUCUGUAUUCUGUUACA	Translation	similar to UniRef100_A7P2L9 Cluster: Chromosome chr1 scaffold_5, whole genome shotgun sequence; n=1; Vitis vinifera|Rep: Chromosome chr1 scaffold_5, whole genome shotgun sequence - Vitis vinifera (Grape), partial (37%)
	bpe-miR156aa.TGs.G2A.G7A	TGTAACAGAAGATAGAGAGCAC	TC151091	2	1	22	472	493	UGUAACAGAAGAUAGAGAGCAC	:: ::. ::.::::::::::::	GUCCUUCCUGUCUUCUGUUACA	Cleavage	similar to UniRef100_Q2PJS0 Cluster: WRKY13; n=1; Glycine max|Rep: WRKY13 - Glycine max (Soybean), partial (31%)
	bpe-miR156aa.TGs.G2A.G7A	TGTAACAGAAGATAGAGAGCAC	TC162878	2	1	22	465	486	UGUAACAGAAGAUAGAGAGCAC	:: ::. ::.::::::::::::	GUCCUUCCUGUCUUCUGUUACA	Cleavage	similar to UniRef100_Q2PJS0 Cluster: WRKY13; n=1; Glycine max|Rep: WRKY13 - Glycine max (Soybean), partial (57%)
	bpe-miR156aa.TGs.G2A.G7A	TGTAACAGAAGATAGAGAGCAC	TC159497	2	1	22	733	754	UGUAACAGAAGAUAGAGAGCAC	: .: :.::::::::::::::	AUCUUGUUUAUCUUCUGUUACA	Cleavage	similar to UniRef100_A7QW70 Cluster: Chromosome chr3 scaffold_199, whole genome shotgun sequence; n=1; Vitis vinifera|Rep: Chromosome chr3 scaffold_199, whole genome shotgun sequence - Vitis vinifera (Grape), partial (68%)
	bpe-miR156aa.TGs.G2A.G7A	TGTAACAGAAGATAGAGAGCAC	TC165978	2.5	1	22	249	271	UGUAACAGAAGAUAGA-GAGCAC	::::: ::::::::.:::::::	AUGCUCCUCUAUCUUUUGUUACA	Cleavage	similar to UniRef100_A7PR50 Cluster: Chromosome chr14 scaffold_26, whole genome shotgun sequence; n=1; Vitis vinifera|Rep: Chromosome chr14 scaffold_26, whole genome shotgun sequence - Vitis vinifera (Grape), partial (42%)
	bpe-miR156aa.TGs.G2A.G7A	TGTAACAGAAGATAGAGAGCAC	TC147472	2.5	1	22	649	670	UGUAACAGAAGAUAGAGAGCAC	:::.:::::.:::::: :::	AGGCUUUCUAUUUUCUGUGACA	Cleavage	homologue to UniRef100_A7QN57 Cluster: Chromosome undetermined scaffold_130, whole genome shotgun sequence; n=1; Vitis vinifera|Rep: Chromosome undetermined scaffold_130, whole genome shotgun sequence - Vitis vinifera (Grape), partial (19%)
	bpe-miR156aa.TGs.G2A.G7A	TGTAACAGAAGATAGAGAGCAC	TC142645	2.5	1	22	538	559	UGUAACAGAAGAUAGAGAGCAC	: ::.::: :.::::::::::	UUCCUUUCUUUUUUCUGUUACA	Cleavage	similar to UniRef100_A7R062 Cluster: Chromosome chr10 scaffold_297, whole genome shotgun sequence; n=1; Vitis vinifera|Rep: Chromosome chr10 scaffold_297, whole genome shotgun sequence - Vitis vinifera (Grape), partial (29%)
	bpe-miR156aa.TGs.G2A.G7A	TGTAACAGAAGATAGAGAGCAC	TC147012	2.5	1	22	89	110	UGUAACAGAAGAUAGAGAGCAC	::.:::::::::: ::.::	UCACUUUCUAUCUUCUCUUGCA	Cleavage	similar to UniRef100_Q6UA14 Cluster: Fiber protein Fb25; n=1; Gossypium barbadense|Rep: Fiber protein Fb25 - Gossypium barbadense (Sea-island cotton) (Egyptian cotton), partial (92%)
	bpe-miR156aa.TGs.G2A.G7A	TGTAACAGAAGATAGAGAGCAC	TC176212	3	1	22	359	380	UGUAACAGAAGAUAGAGAGCAC	:::::::: :::::::::::	CUGCUCUCUUCCUUCUGUUACA	Cleavage	similar to UniRef100_A7QHW1 Cluster: Chromosome undetermined scaffold_100, whole genome shotgun sequence; n=1; Vitis vinifera|Rep: Chromosome undetermined scaffold_100, whole genome shotgun sequence - Vitis vinifera (Grape), partial (17%)
	bpe-miR156aa.TGs.G2A.G7A	TGTAACAGAAGATAGAGAGCAC	TC157437	3	1	22	344	365	UGUAACAGAAGAUAGAGAGCAC	:::::::: :::::::::::	CUGCUCUCUUCCUUCUGUUACA	Cleavage	similar to UniRef100_A7QHW1 Cluster: Chromosome undetermined scaffold_100, whole genome shotgun sequence; n=1; Vitis vinifera|Rep: Chromosome undetermined scaffold_100, whole genome shotgun sequence - Vitis vinifera (Grape), partial (38%)
	bpe-miR156aa.TGs.G2A.G7A	TGTAACAGAAGATAGAGAGCAC	BU824464	3	1	22	65	86	UGUAACAGAAGAUAGAGAGCAC	::.:::.::::::::::	UUUUGCUUUAUUUUCUGUUACA	Cleavage	similar to UniRef100_Q27J84 Cluster: Alkaline alpha galactosidase; n=1; Cucumis sativus|Rep: Alkaline alpha galactosidase - Cucumis sativus (Cucumber), partial (18%)
	bpe-miR156aa.TGs.G2A.G7A	TGTAACAGAAGATAGAGAGCAC	TC141406	3	1	22	58	79	UGUAACAGAAGAUAGAGAGCAC	:.:::::::::::::: :	AAAAUUUCUAUCUUCUGUUAAA	Cleavage	similar to UniRef100_A7LH72 Cluster: GEM-like 1; n=1; Vitis vinifera|Rep: GEM-like 1 - Vitis vinifera (Grape), partial (64%)
	bpe-miR156aa.TGs.G2A.G7A	TGTAACAGAAGATAGAGAGCAC	TC161415	3	1	22	163	184	UGUAACAGAAGAUAGAGAGCAC	::::::.:.::.:::::.	UCUCUCUCUGUUUUUUGUUAUU	Cleavage	similar to UniRef100_P45350 Cluster: Bifunctional dihydrofolate reductase-thymidylate synthase (DHFR-TS) [Includes: Dihydrofolate reductase ; Thymidylate synthase ]; n=1; Daucus carota|Rep: Bifunctional dihydrofolate reductase-thymidylate synthase (DHFR-TS) [Includes: Dihydrofolate reductase ; Thymidylate synthase ] - Daucus carota (Carrot), partial (53%)
	bpe-miR156aa.TGs.G2A.G7A	TGTAACAGAAGATAGAGAGCAC	DB875069	3	1	22	369	390	UGUAACAGAAGAUAGAGAGCAC	.::::::::::.:: :.::	UCAUUCUCUAUCUUUUGCUGCA	Cleavage	homologue to UniRef100_Q07701 Cluster: EBNA-2; n=1; Cercopithecine herpesvirus 12|Rep: EBNA-2 - Cercopithecine herpesvirus 12 (CeHV-12) (Baboon herpesvirus), partial (4%)
	bpe-miR156aa.TGs.G2A.G7A	TGTAACAGAAGATAGAGAGCAC	DN486006	3	1	22	7	28	UGUAACAGAAGAUAGAGAGCAC	::.:::::.:::: :::.:	UCCCUUUCUAUUUUCUUUUAUA	Cleavage	similar to UniRef100_A7QH95 Cluster: Chromosome chr18 scaffold_96, whole genome shotgun sequence; n=1; Vitis vinifera|Rep: Chromosome chr18 scaffold_96, whole genome shotgun sequence - Vitis vinifera (Grape), partial (3%)
	bpe-miR156aa.TGs.G2A.G7A	TGTAACAGAAGATAGAGAGCAC	TC156810	3	1	22	151	172	UGUAACAGAAGAUAGAGAGCAC	.:.::: :::::::::.::	UAUUUUUCUCUCUUCUGUUGCA	Cleavage	similar to UniRef100_Q45TE3 Cluster: Senescence-associated protein; n=1; Nicotiana tabacum|Rep: Senescence-associated protein - Nicotiana tabacum (Common tobacco), partial (61%)
	bpe-miR156aa.TGs.G2A.G7A	TGTAACAGAAGATAGAGAGCAC	TC138820	3	1	22	211	232	UGUAACAGAAGAUAGAGAGCAC	.::::::::::.:: :.::	UCAUUCUCUAUCUUUUGCUGCA	Cleavage	similar to UniRef100_A2Q497 Cluster: Patatin; n=1; Medicago truncatula|Rep: Patatin - Medicago truncatula (Barrel medic), partial (75%)
	bpe-miR156aa.TGs.G2A.G7A	TGTAACAGAAGATAGAGAGCAC	TC161524	3	1	22	222	243	UGUAACAGAAGAUAGAGAGCAC	: ::.:::.::.::::::.	GGCCGCUUUAUUUUUUGUUACG	Cleavage	similar to UniRef100_A7QP35 Cluster: Chromosome chr1 scaffold_136, whole genome shotgun sequence; n=1; Vitis vinifera|Rep: Chromosome chr1 scaffold_136, whole genome shotgun sequence - Vitis vinifera (Grape), partial (57%)
	bpe-miR156aa.TGs.G7A.ac	TGTGACAGAAGATAGAGAGC	TC153290	1.5	1	20	694	713	UGUGACAGAAGAUAGAGAGC	:::.:::.::::::::.:::	GCUUUCUGUCUUCUGUUACA	Cleavage	similar to UniRef100_A7Q1C9 Cluster: Chromosome chr10 scaffold_43, whole genome shotgun sequence; n=1; Vitis vinifera|Rep: Chromosome chr10 scaffold_43, whole genome shotgun sequence - Vitis vinifera (Grape), partial (29%)
	bpe-miR156aa.TGs.G7A.ac	TGTGACAGAAGATAGAGAGC	DN487777	2	1	20	381	400	UGUGACAGAAGAUAGAGAGC	: :: ::::::::::::::	UCCCUAUAUCUUCUGUCACA	Cleavage	similar to UniRef100_A9TDC4 Cluster: Predicted protein; n=1; Physcomitrella patens subsp. patens|Rep: Predicted protein - Physcomitrella patens subsp. patens, partial (27%)
	bpe-miR156aa.TGs.G7A.ac	TGTGACAGAAGATAGAGAGC	TC169095	2.5	1	20	442	461	UGUGACAGAAGAUAGAGAGC	:::::::.: ::::::.:::	GCUCUCUGUAUUCUGUUACA	Translation	similar to UniRef100_A7P2L9 Cluster: Chromosome chr1 scaffold_5, whole genome shotgun sequence; n=1; Vitis vinifera|Rep: Chromosome chr1 scaffold_5, whole genome shotgun sequence - Vitis vinifera (Grape), partial (38%)
	bpe-miR156aa.TGs.G7A.ac	TGTGACAGAAGATAGAGAGC	DT492780	2.5	1	20	484	503	UGUGACAGAAGAUAGAGAGC	:::::::.: ::::::.:::	GCUCUCUGUAUUCUGUUACA	Translation	similar to UniRef100_A7P2L9 Cluster: Chromosome chr1 scaffold_5, whole genome shotgun sequence; n=1; Vitis vinifera|Rep: Chromosome chr1 scaffold_5, whole genome shotgun sequence - Vitis vinifera (Grape), partial (37%)
	bpe-miR156aa.TGs.G7A.ac	TGTGACAGAAGATAGAGAGC	TC147472	2.5	1	20	651	670	UGUGACAGAAGAUAGAGAGC	:::.:::::.:::::: :::	GCUUUCUAUUUUCUGUGACA	Cleavage	homologue to UniRef100_A7QN57 Cluster: Chromosome undetermined scaffold_130, whole genome shotgun sequence; n=1; Vitis vinifera|Rep: Chromosome undetermined scaffold_130, whole genome shotgun sequence - Vitis vinifera (Grape), partial (19%)
	bpe-miR156aa.TGs.G7A.ac	TGTGACAGAAGATAGAGAGC	TC162499	2.5	1	20	13	32	UGUGACAGAAGAUAGAGAGC	:::::: ::::.:::::.:	CCUCUCUCUCUUUUGUCAUA	Cleavage	similar to UniRef100_Q3E7D0 Cluster: Nucleobase-ascorbate transporter 12; n=3; Arabidopsis thaliana|Rep: Nucleobase-ascorbate transporter 12 - Arabidopsis thaliana (Mouse-ear cress), partial (8%)
	bpe-miR156aa.TGs.G7A.ac	TGTGACAGAAGATAGAGAGC	TC146022	2.5	1	20	34	53	UGUGACAGAAGAUAGAGAGC	:::::::::::::: ::..	UCUCUCUAUCUUCUGCCAUG	Cleavage	homologue to UniRef100_Q5VB46 Cluster: Acetolactate synthase; n=1; Helianthus annuus|Rep: Acetolactate synthase - Helianthus annuus (Common sunflower), partial (23%)
	bpe-miR156aa.TGs.G7A.ac	TGTGACAGAAGATAGAGAGC	TC174001	2.5	1	20	830	849	UGUGACAGAAGAUAGAGAGC	::::::.:. :::::::::	CCUCUCUGUUAUCUGUCACA	Translation	similar to UniRef100_A7P3U2 Cluster: Chromosome chr1 scaffold_5, whole genome shotgun sequence; n=1; Vitis vinifera|Rep: Chromosome chr1 scaffold_5, whole genome shotgun sequence - Vitis vinifera (Grape), partial (30%)
	bpe-miR156aa.TGs.G7A.ac	TGTGACAGAAGATAGAGAGC	TC151091	2.5	1	20	474	493	UGUGACAGAAGAUAGAGAGC	::. ::.::::::::.:::	CCUUCCUGUCUUCUGUUACA	Cleavage	similar to UniRef100_Q2PJS0 Cluster: WRKY13; n=1; Glycine max|Rep: WRKY13 - Glycine max (Soybean), partial (31%)
	bpe-miR156aa.TGs.G7A.ac	TGTGACAGAAGATAGAGAGC	TC147854	2.5	1	20	107	126	UGUGACAGAAGAUAGAGAGC	:::: : ::::::::::::	UCUCUAUUUCUUCUGUCACA	Cleavage
	bpe-miR156aa.TGs.G7A.ac	TGTGACAGAAGATAGAGAGC	TC159497	2.5	1	20	735	754	UGUGACAGAAGAUAGAGAGC	.: :.::::::::::.:::	CUUGUUUAUCUUCUGUUACA	Cleavage	similar to UniRef100_A7QW70 Cluster: Chromosome chr3 scaffold_199, whole genome shotgun sequence; n=1; Vitis vinifera|Rep: Chromosome chr3 scaffold_199, whole genome shotgun sequence - Vitis vinifera (Grape), partial (68%)
	bpe-miR156aa.TGs.G7A.ac	TGTGACAGAAGATAGAGAGC	TC162878	2.5	1	20	467	486	UGUGACAGAAGAUAGAGAGC	::. ::.::::::::.:::	CCUUCCUGUCUUCUGUUACA	Cleavage	similar to UniRef100_Q2PJS0 Cluster: WRKY13; n=1; Glycine max|Rep: WRKY13 - Glycine max (Soybean), partial (57%)
	bpe-miR156aa.TGs.G7A.ac	TGTGACAGAAGATAGAGAGC	TC170313	3	1	20	47	66	UGUGACAGAAGAUAGAGAGC	::::::: ::::::::::.	GCUCUCUCUCUUCUGUCAUC	Cleavage
	bpe-miR156aa.TGs.G7A.ac	TGTGACAGAAGATAGAGAGC	DB880563	3	1	20	152	171	UGUGACAGAAGAUAGAGAGC	:::::::.:::::: ::::	GCUCUCUGUCUUCUUUCACU	Cleavage	weakly similar to UniRef100_Q0IBZ2 Cluster: Transporter, major facilitator family protein; n=1; Synechococcus sp. CC9311|Rep: Transporter, major facilitator family protein - Synechococcus sp. (strain CC9311), partial (6%)
	bpe-miR156aa.TGs.G7A.ac	TGTGACAGAAGATAGAGAGC	TC140194	3	1	20	393	412	UGUGACAGAAGAUAGAGAGC	::::::: ::::::::::.	GCUCUCUCUCUUCUGUCAUC	Cleavage	similar to UniRef100_A7PKG5 Cluster: Chromosome chr15 scaffold_19, whole genome shotgun sequence; n=1; Vitis vinifera|Rep: Chromosome chr15 scaffold_19, whole genome shotgun sequence - Vitis vinifera (Grape), partial (67%)
	bpe-miR156aa.TGs.G7A.ac	TGTGACAGAAGATAGAGAGC	TC138639	3	1	20	683	702	UGUGACAGAAGAUAGAGAGC	::::::: ::::::::::.	GCUCUCUCUCUUCUGUCAUC	Cleavage	similar to UniRef100_A7PJ70 Cluster: Chromosome chr12 scaffold_18, whole genome shotgun sequence; n=1; Vitis vinifera|Rep: Chromosome chr12 scaffold_18, whole genome shotgun sequence - Vitis vinifera (Grape), partial (70%)
	bpe-miR156aa.TGs.G7A.ac	TGTGACAGAAGATAGAGAGC	TC183201	3	1	20	907	926	UGUGACAGAAGAUAGAGAGC	::::::: ::::::::::.	GCUCUCUCUCUUCUGUCAUC	Cleavage	similar to UniRef100_Q52UU1 Cluster: Squamosa promoter binding-like protein; n=1; Betula platyphylla|Rep: Squamosa promoter binding-like protein - Betula platyphylla, partial (74%)
	bpe-miR156aa.TGs.G7A.ac	TGTGACAGAAGATAGAGAGC	TC179932	3	1	20	834	853	UGUGACAGAAGAUAGAGAGC	::::::: ::::::::::.	GCUCUCUCUCUUCUGUCAUC	Cleavage	similar to UniRef100_A7QP31 Cluster: Chromosome chr1 scaffold_136, whole genome shotgun sequence; n=1; Vitis vinifera|Rep: Chromosome chr1 scaffold_136, whole genome shotgun sequence - Vitis vinifera (Grape), partial (53%)
	bpe-miR156aa.TGs.G7A.ac	TGTGACAGAAGATAGAGAGC	TC181875	3	1	20	982	1001	UGUGACAGAAGAUAGAGAGC	::::::: ::::::::::.	GCUCUCUCUCUUCUGUCAUC	Cleavage	homologue to UniRef100_Q96035 Cluster: Cytochrome oxidase subunit 3; n=1; Magnolia grandiflora|Rep: Cytochrome oxidase subunit 3 - Magnolia grandiflora (Southern magnolia), partial (69%)
	bpe-miR156aa.TGs.G7A.ac	TGTGACAGAAGATAGAGAGC	TC155685	3	1	20	1164	1183	UGUGACAGAAGAUAGAGAGC	::::::: ::::::::::.	GCUCUCUCUCUUCUGUCAUC	Cleavage	similar to UniRef100_Q6YZE8 Cluster: Squamosa promoter-binding-like protein 16; n=1; Oryza sativa Japonica Group|Rep: Squamosa promoter-binding-like protein 16 - Oryza sativa subsp. japonica (Rice), partial (24%)
	bpe-miR156aa.TGs.G7A.ac	TGTGACAGAAGATAGAGAGC	TC140316	3	1	20	1080	1099	UGUGACAGAAGAUAGAGAGC	::::::: ::::::::::.	GCUCUCUCUCUUCUGUCAUC	Cleavage	similar to UniRef100_A7PKG5 Cluster: Chromosome chr15 scaffold_19, whole genome shotgun sequence; n=1; Vitis vinifera|Rep: Chromosome chr15 scaffold_19, whole genome shotgun sequence - Vitis vinifera (Grape), partial (72%)
	bpe-miR156aa.TGs.G7A.ac	TGTGACAGAAGATAGAGAGC	TC159682	3	1	20	44	63	UGUGACAGAAGAUAGAGAGC	::::::: :::::::::: :	GCUCUCUCUCUUCUGUCAAA	Cleavage	similar to UniRef100_A7PFE5 Cluster: Chromosome chr11 scaffold_14, whole genome shotgun sequence; n=1; Vitis vinifera|Rep: Chromosome chr11 scaffold_14, whole genome shotgun sequence - Vitis vinifera (Grape), partial (6%)
	bpe-miR156aa.TGs.G7A.ac	TGTGACAGAAGATAGAGAGC	TC156238	3	1	20	630	649	UGUGACAGAAGAUAGAGAGC	::::::: :::::::::: :	GCUCUCUCUCUUCUGUCAAA	Cleavage	similar to UniRef100_A7QPU0 Cluster: Chromosome chr10 scaffold_138, whole genome shotgun sequence; n=1; Vitis vinifera|Rep: Chromosome chr10 scaffold_138, whole genome shotgun sequence - Vitis vinifera (Grape), partial (69%)
	bpe-miR156aa.TGs.G7A.ac	TGTGACAGAAGATAGAGAGC	TC162283	3	1	20	194	213	UGUGACAGAAGAUAGAGAGC	::::::: :::::::::: :	GCUCUCUCUCUUCUGUCAAA	Cleavage	similar to UniRef100_A7PFE5 Cluster: Chromosome chr11 scaffold_14, whole genome shotgun sequence; n=1; Vitis vinifera|Rep: Chromosome chr11 scaffold_14, whole genome shotgun sequence - Vitis vinifera (Grape), partial (6%)
	bpe-miR156aa.TGs.G7A.ac	TGTGACAGAAGATAGAGAGC	TC150948	3	1	20	344	363	UGUGACAGAAGAUAGAGAGC	::::::: :::::::::: :	GCUCUCUCUCUUCUGUCAAA	Cleavage	similar to UniRef100_A7PFE5 Cluster: Chromosome chr11 scaffold_14, whole genome shotgun sequence; n=1; Vitis vinifera|Rep: Chromosome chr11 scaffold_14, whole genome shotgun sequence - Vitis vinifera (Grape), partial (10%)
	bpe-miR156aa.TGs.G7A.ac	TGTGACAGAAGATAGAGAGC	TC183825	3	1	20	403	422	UGUGACAGAAGAUAGAGAGC	::::::: :::::::::: :	GCUCUCUCUCUUCUGUCAAA	Cleavage	similar to UniRef100_A7PFE5 Cluster: Chromosome chr11 scaffold_14, whole genome shotgun sequence; n=1; Vitis vinifera|Rep: Chromosome chr11 scaffold_14, whole genome shotgun sequence - Vitis vinifera (Grape), partial (11%)
	bpe-miR156aa.TGs.G7A.ac	TGTGACAGAAGATAGAGAGC	TC183578	3	1	20	598	617	UGUGACAGAAGAUAGAGAGC	:::::: ::.::::::::.	GCUCUCCAUUUUCUGUCAUC	Cleavage	weakly similar to UniRef100_A7NXD5 Cluster: Chromosome chr5 scaffold_2, whole genome shotgun sequence; n=1; Vitis vinifera|Rep: Chromosome chr5 scaffold_2, whole genome shotgun sequence - Vitis vinifera (Grape), partial (12%)
	bpe-miR156aa.TGs.G7A.ac	TGTGACAGAAGATAGAGAGC	TC165978	3	1	20	251	271	UGUGACAGAAGAUAGA-GAGC	:::: ::::::::.:::.:::	GCUCCUCUAUCUUUUGUUACA	Cleavage	similar to UniRef100_A7PR50 Cluster: Chromosome chr14 scaffold_26, whole genome shotgun sequence; n=1; Vitis vinifera|Rep: Chromosome chr14 scaffold_26, whole genome shotgun sequence - Vitis vinifera (Grape), partial (42%)
	bpe-miR156aa.TGs.G7A.ac	TGTGACAGAAGATAGAGAGC	TC151875	3	1	20	958	977	UGUGACAGAAGAUAGAGAGC	:::::: ::.::::::::.	GCUCUCCAUUUUCUGUCAUC	Cleavage	similar to UniRef100_A7NXD5 Cluster: Chromosome chr5 scaffold_2, whole genome shotgun sequence; n=1; Vitis vinifera|Rep: Chromosome chr5 scaffold_2, whole genome shotgun sequence - Vitis vinifera (Grape), partial (32%)
	bpe-miR156aa.TGs.G7A.ac	TGTGACAGAAGATAGAGAGC	AJ641080	3	1	20	32	51	UGUGACAGAAGAUAGAGAGC	::::::: ::.:::::::	AAUCUCUAUAUUUUGUCACA	Translation
	bpe-miR156aa.TGs.G7A.ac	TGTGACAGAAGATAGAGAGC	TC169703	3	1	20	190	209	UGUGACAGAAGAUAGAGAGC	::::::::::::: ::.:	CCUCUCUAUCUUCUCUCGCC	Cleavage	similar to UniRef100_A7QM63 Cluster: Chromosome chr5 scaffold_124, whole genome shotgun sequence; n=1; Vitis vinifera|Rep: Chromosome chr5 scaffold_124, whole genome shotgun sequence - Vitis vinifera (Grape), partial (79%)
	bpe-miR156aa.TGs.G7A.ac	TGTGACAGAAGATAGAGAGC	CK111958	3	1	20	191	210	UGUGACAGAAGAUAGAGAGC	::::::::::::: ::.:	CCUCUCUAUCUUCUCUCGCC	Cleavage	similar to UniRef100_A7QM63 Cluster: Chromosome chr5 scaffold_124, whole genome shotgun sequence; n=1; Vitis vinifera|Rep: Chromosome chr5 scaffold_124, whole genome shotgun sequence - Vitis vinifera (Grape), partial (79%)
	bpe-miR156aa.TGs.G7A.ac	TGTGACAGAAGATAGAGAGC	TC151261	3	1	20	206	225	UGUGACAGAAGAUAGAGAGC	.:::::::::::: ::::	UUUCUCUAUCUUCUCUCACU	Cleavage	similar to UniRef100_A7PLV3 Cluster: Chromosome chr14 scaffold_21, whole genome shotgun sequence; n=1; Vitis vinifera|Rep: Chromosome chr14 scaffold_21, whole genome shotgun sequence - Vitis vinifera (Grape), partial (86%)
	bpe-miR156aa.TGs.G7A.ac	TGTGACAGAAGATAGAGAGC	DT522215	3	1	20	272	291	UGUGACAGAAGAUAGAGAGC	::::::.:.: .:::::::	UCUCUCUGUUUCUUGUCACA	Cleavage	weakly similar to UniRef100_Q6FW57 Cluster: Candida glabrata strain CBS138 chromosome D complete sequence; n=1; Candida glabrata|Rep: Candida glabrata strain CBS138 chromosome D complete sequence - Candida glabrata (Yeast) (Torulopsis glabrata), partial (5%)
	bpe-miR156aa.TGs.G7A.ac	TGTGACAGAAGATAGAGAGC	CN517331	3	1	20	164	183	UGUGACAGAAGAUAGAGAGC	.:::.:.::::.::::..:	CUUCUUUGUCUUUUGUCGUA	Cleavage	similar to UniRef100_A7PKN4 Cluster: Chromosome chr7 scaffold_20, whole genome shotgun sequence; n=1; Vitis vinifera|Rep: Chromosome chr7 scaffold_20, whole genome shotgun sequence - Vitis vinifera (Grape), partial (18%)
	bpe-miR156aa.TGs.G7A.ac	TGTGACAGAAGATAGAGAGC	TC174962	3	1	20	17	36	UGUGACAGAAGAUAGAGAGC	:::::: :::::: :::::	CCUCUCUCUCUUCUAUCACA	Cleavage	similar to UniRef100_A7R6T9 Cluster: Chromosome undetermined scaffold_1419, whole genome shotgun sequence; n=1; Vitis vinifera|Rep: Chromosome undetermined scaffold_1419, whole genome shotgun sequence - Vitis vinifera (Grape), partial (22%)
	bpe-miR156aa.TGs.G7A.ac	TGTGACAGAAGATAGAGAGC	TC147012	3	1	20	91	110	UGUGACAGAAGAUAGAGAGC	::.:::::::::: :..::	ACUUUCUAUCUUCUCUUGCA	Cleavage	similar to UniRef100_Q6UA14 Cluster: Fiber protein Fb25; n=1; Gossypium barbadense|Rep: Fiber protein Fb25 - Gossypium barbadense (Sea-island cotton) (Egyptian cotton), partial (92%)
	bpe-miR156aa.TGs.G7A.ac	TGTGACAGAAGATAGAGAGC	TC142645	3	1	20	540	559	UGUGACAGAAGAUAGAGAGC	::.::: :.::::::.:::	CCUUUCUUUUUUCUGUUACA	Cleavage	similar to UniRef100_A7R062 Cluster: Chromosome chr10 scaffold_297, whole genome shotgun sequence; n=1; Vitis vinifera|Rep: Chromosome chr10 scaffold_297, whole genome shotgun sequence - Vitis vinifera (Grape), partial (29%)
	bpe-miR156aa.TGs.G7A.ac	TGTGACAGAAGATAGAGAGC	TC144257	3	1	20	4	23	UGUGACAGAAGAUAGAGAGC	::::::::::::: :: ::	ACUCUCUAUCUUCUCUCUCA	Cleavage	similar to UniRef100_A7QUQ7 Cluster: Chromosome chr1 scaffold_180, whole genome shotgun sequence; n=1; Vitis vinifera|Rep: Chromosome chr1 scaffold_180, whole genome shotgun sequence - Vitis vinifera (Grape), partial (39%)
	bpe-miR156aa.TGs.G7A.ac	TGTGACAGAAGATAGAGAGC	TC148444	3	1	20	711	730	UGUGACAGAAGAUAGAGAGC	:: ::::::::.:::::.	CCUGUCUAUCUUUUGUCAUU	Cleavage	similar to UniRef100_A7PGH3 Cluster: Chromosome chr17 scaffold_16, whole genome shotgun sequence; n=1; Vitis vinifera|Rep: Chromosome chr17 scaffold_16, whole genome shotgun sequence - Vitis vinifera (Grape), partial (22%)
	bpe-miR156aa.TGs.G7A.ac	TGTGACAGAAGATAGAGAGC	TC187734	3	1	20	723	742	UGUGACAGAAGAUAGAGAGC	:::: .:.::::::::::	AGUCUCAGUUUUCUGUCACA	Cleavage	similar to UniRef100_A7P396 Cluster: Chromosome chr1 scaffold_5, whole genome shotgun sequence; n=1; Vitis vinifera|Rep: Chromosome chr1 scaffold_5, whole genome shotgun sequence - Vitis vinifera (Grape), partial (71%)
	bpe-miR156aa.TGs.G7A.ac	TGTGACAGAAGATAGAGAGC	TC155204	3	1	20	762	781	UGUGACAGAAGAUAGAGAGC	:::: .:.::::::::::	AGUCUCAGUUUUCUGUCACA	Cleavage	weakly similar to UniRef100_A7P396 Cluster: Chromosome chr1 scaffold_5, whole genome shotgun sequence; n=1; Vitis vinifera|Rep: Chromosome chr1 scaffold_5, whole genome shotgun sequence - Vitis vinifera (Grape), partial (86%)
	bpe-miR156aa.TGs.G7A.ac	TGTGACAGAAGATAGAGAGC	TC168736	3	1	20	37	56	UGUGACAGAAGAUAGAGAGC	::: ::.::::::::: ::	UCUCACUGUCUUCUGUCUCA	Cleavage	similar to UniRef100_A7QQ47 Cluster: Chromosome chr2 scaffold_140, whole genome shotgun sequence; n=1; Vitis vinifera|Rep: Chromosome chr2 scaffold_140, whole genome shotgun sequence - Vitis vinifera (Grape), partial (43%)
	bpe-miR156aa.TGs.T1C.G2T.A3C.C4T.A5C.G6T.G7A.A8G.G9C.A10T.T11C.A12C.G13T.A14G.G15T.A16C.G17A.C18T.A19C.c	TGCTCTCTAGCTCCTGTCATC	TC169741	3	1	21	520	540	UGCUCUCUAGCUCCUGUCAUC	:.:::.:::.:: ::::.:::	GGUGAUAGGGGCCAGAGGGCA	Cleavage	similar to UniRef100_A7P8Q4 Cluster: Chromosome chr3 scaffold_8, whole genome shotgun sequence; n=1; Vitis vinifera|Rep: Chromosome chr3 scaffold_8, whole genome shotgun sequence - Vitis vinifera (Grape), partial (21%)
	bpe-miR156aa.TGs.T1C.G2T.A3C.C4T.A5C.G6T.G7A.A8G.G9C.A10T.T11C.A12C.G13T.A14G.G15T.A16C.G17A.C18T.A19C.c	TGCTCTCTAGCTCCTGTCATC	DB889003	3	1	21	138	158	UGCUCUCUAGCUCCUGUCAUC	:::...::::.:::::::..	AAUGGUGGGAGUUAGAGAGUG	Cleavage	weakly similar to UniRef100_A7P1N6 Cluster: Chromosome chr19 scaffold_4, whole genome shotgun sequence; n=1; Vitis vinifera|Rep: Chromosome chr19 scaffold_4, whole genome shotgun sequence - Vitis vinifera (Grape), partial (6%)
	bpe-miR156aa.TGs.T1C.G2T.A3C.C4T.A5C.G6T.G7A.A8G.G9C.A10T.T11C.A12C.G13T.A14G.G15T.A16C.G17A.C18T.A19C.c	TGCTCTCTAGCTCCTGTCATC	TC163773	3	1	21	144	164	UGCUCUCUAGCUCCUGUCAUC	:::::::.::::::::.	GCAAACAGGAGUUAGAGAGCG	Cleavage
	bpe-miR156aa.TGs.T1C.G2T.A3C.C4T.A5C.G6T.G7A.A8G.G9C.A10T.T11C.A12C.G13T.A14G.G15T.A16C.G17A.C18T.A19C.c	TGCTCTCTAGCTCCTGTCATC	CV269125	3	1	21	565	585	UGCUCUCUAGCUCCUGUCAUC	: ::::::::: ::::::.:	AAGGACAGGAGCGAGAGAGUA	Cleavage	similar to UniRef100_A7Q217 Cluster: Chromosome chr13 scaffold_45, whole genome shotgun sequence; n=1; Vitis vinifera|Rep: Chromosome chr13 scaffold_45, whole genome shotgun sequence - Vitis vinifera (Grape), partial (27%)
	bpe-miR156aa.TGs.T1C.G2T.A3C.C4T.A5C.G6T.G7A.A8G.G9C.A10T.T11C.A12C.G13T.A14G.G15T.A16C.G17A.C18T.A19C.c	TGCTCTCTAGCTCCTGTCATC	TC157004	3	1	21	206	226	UGCUCUCUAGCUCCUGUCAUC	:::::::.::::::::.	GCAAACAGGAGUUAGAGAGCG	Cleavage	similar to UniRef100_Q6NNI8 Cluster: Zinc finger A20 and AN1 domain-containing stress-associated protein 1; n=1; Arabidopsis thaliana|Rep: Zinc finger A20 and AN1 domain-containing stress-associated protein 1 - Arabidopsis thaliana (Mouse-ear cress), partial (74%)
	bpe-miR156aa.TGs.T1C.G2T.A3C.C4T.A5C.G6T.G7A.A8G.G9C.A10T.T11C.A12C.G13T.A14G.G15T.A16C.G17A.C18T.A19C.c	TGCTCTCTAGCTCCTGTCATC	TC141334	3	1	21	174	194	UGCUCUCUAGCUCCUGUCAUC	:::::::.::::::::.	GCAAACAGGAGUUAGAGAGCG	Cleavage	similar to UniRef100_A1YMZ7 Cluster: Zinc finger A20 and AN1 domains-containing protein; n=1; Brassica rapa|Rep: Zinc finger A20 and AN1 domains-containing protein - Brassica campestris (Field mustard), partial (72%)
	bpe-miR156aa.TGs.T1C.G2T.A3C.C4T.A5C.G6T.G7A.A8G.G9C.A10T.T11C.A12C.G13T.A14G.G15T.A16C.G17A.C18T.A19C.c	TGCTCTCTAGCTCCTGTCATC	TC150798	3	1	21	37	57	UGCUCUCUAGCUCCUGUCAUC	.::::::: :::.:::.:.:	CGUGACAGGUGCUGGAGGGUA	Cleavage	weakly similar to UniRef100_A7PJZ9 Cluster: Chromosome chr12 scaffold_18, whole genome shotgun sequence; n=1; Vitis vinifera|Rep: Chromosome chr12 scaffold_18, whole genome shotgun sequence - Vitis vinifera (Grape), partial (90%)
	bpe-miR156aa.TGs.T1C.G2T.A3C.C4T.A5C.G6T.G7A.A8G.G9C.A10T.T11C.A12C.G13T.A14G.G15T.A16C.G17A.C18T.A19C.c	TGCTCTCTAGCTCCTGTCATC	TC169749	3	1	21	143	163	UGCUCUCUAGCUCCUGUCAUC	::::::::: .:::::::	UGGGACAGGAGCCGGAGAGCA	Cleavage	similar to UniRef100_A7NSV2 Cluster: Chromosome chr18 scaffold_1, whole genome shotgun sequence; n=1; Vitis vinifera|Rep: Chromosome chr18 scaffold_1, whole genome shotgun sequence - Vitis vinifera (Grape), partial (17%)
	bpe-miR156aa.TGs.T1C.G2T.A3C.C4T.A5C.G6T.G7A.A8G.G9C.A10T.T11C.A12C.G13T.A14G.G15T.A16C.G17A.C18T.A19C.c	TGCTCTCTAGCTCCTGTCATC	TC160726	3	1	21	246	266	UGCUCUCUAGCUCCUGUCAUC	::::::::: .:::::::	UGGGACAGGAGCCGGAGAGCA	Cleavage	similar to UniRef100_A7NSV2 Cluster: Chromosome chr18 scaffold_1, whole genome shotgun sequence; n=1; Vitis vinifera|Rep: Chromosome chr18 scaffold_1, whole genome shotgun sequence - Vitis vinifera (Grape), partial (17%)
	bpe-miR156aa.TGs.T1C.G2T.A3C.C4T.A5C.G6T.G7A.A8G.G9C.A10T.T11C.A12C.G13T.A14G.G15T.A16C.G17A.C18T.A19C.c	TGCTCTCTAGCTCCTGTCATC	TC163843	3	1	21	246	266	UGCUCUCUAGCUCCUGUCAUC	::::::::: .:::::::	UGGGACAGGAGCCGGAGAGCA	Cleavage
	bpe-miR156aa.TGs.T1C.G2T.A3C.C4T.A5C.G6T.G7A.A8G.G9C.A10T.T11C.A12C.G13T.A14G.G15T.A16C.G17A.C18T.A19C.c	TGCTCTCTAGCTCCTGTCATC	TC184249	3	1	21	454	474	UGCUCUCUAGCUCCUGUCAUC	::::::::::.:::: ::	UCGGACAGGAGCUGGAGAACA	Cleavage
	bpe-miR156aa.TGs.T1C.G2T.A3C.C4T.A5C.G6T.G7A.A8G.G9C.A10T.T11C.A12C.G13T.A14G.G15T.A16C.G17A.C18T.A19C.c	TGCTCTCTAGCTCCTGTCATC	TC169741	3	1	21	520	540	UGCUCUCUAGCUCCUGUCAUC	:.:::.:::.:: ::::.:::	GGUGAUAGGGGCCAGAGGGCA	Cleavage	similar to UniRef100_A7P8Q4 Cluster: Chromosome chr3 scaffold_8, whole genome shotgun sequence; n=1; Vitis vinifera|Rep: Chromosome chr3 scaffold_8, whole genome shotgun sequence - Vitis vinifera (Grape), partial (21%)
[truncated: 4,752 more rows]

## Sheet: MAT vs JUV target descriptions
MiRNA	Target gene count	Target gene description
bpe-miR156a-5p	146	PGPD14
		Pro-neuregulin-1 membrane-bound isoform precursor (Pro-NRG1)
		Transporter, major facilitator family protein
		COLICIN V PRODUCTION PROTEIN
		Nitrogen fixation protein;
		Wasf1 protein
		17.4 kDa class I heat shock protein 3;
		Ring domain containing protein
		VDAC1.1
bpe-miR156aa	71	71 target genes
		WRKY13
[truncated: 149 more rows]

## Sheet: IVM vs REV target genes
MiRNA isomiR group name	miRNA name	miRNA_sequence	Target_Acc.	Expectation	miRNA_start	miRNA_end	Target_start	Target_end	miRNA_aligned_fragment	alignment	Target_aligned_fragment	Inhibition	Target_Desc.
[truncated: 1,091 more rows]

[truncated: 1 more sheets: IVM vs REV target descriptions]
